# Supplementary material for: Metastatic recurrence in colorectal cancer arises from residual EMP1+ cells
Source: PubMed Central journal article supplement (PMC7616986; doi:10.1038/s41586-022-05402-9), 2022-11-09
Supplement: EMS181817-supplement-Supplemenatry_tables.pdf [file EMS181817-supplement-Supplemenatry_tables.pdf]

# Metastatic recurrence in colorectal cancer arises from residual EMP1+ cells

Adrià Cañellas-Socias<sup>1,2</sup>, Carme Cortina<sup>1,2</sup>, Xavier Hernando-Momblona<sup>1,2</sup>, Sergio Palomo-Ponce<sup>1,2</sup>, Eoghan J. Mulholland<sup>3</sup>, Gemma Turon<sup>1</sup>, Lidia Mateo<sup>1</sup>, Sefora Conti<sup>4</sup>, Olga Roman<sup>1</sup>, Marta Sevillano<sup>1,2</sup>, Felipe Slebe<sup>1</sup>, Diana Stork<sup>1</sup>, Adrià Caballé-Mestres<sup>1</sup>, Antonio Berenguer-Llargo<sup>1</sup>, Adrián Álvarez-Varela<sup>1,2</sup>, Nicola Fenderico<sup>1</sup>, Laura Novellasdemunt<sup>1</sup>, Laura Jiménez-Gracia<sup>5</sup>, Tamara Sipka<sup>1</sup>, Lidia Bardia<sup>1</sup>, Patricia Lorden<sup>5</sup>, Julien Colombelli<sup>1</sup>, Holger Heyn<sup>5,6</sup>, Xavier Trepas<sup>4,7,8,9</sup>, Sabine Tejpar<sup>10</sup>, Elena Sancho<sup>1,2</sup>, Daniele V.F. Tauriello<sup>1,11</sup>, Simon Leedham<sup>3,12</sup>, Camille Stephan-Otto Attolini<sup>1</sup>, Eduard Batlle<sup>1,2,9</sup>

1. Institute for Research in Biomedicine (IRB Barcelona), The Barcelona Institute of Science and Technology (BIST), Barcelona, Spain.
2. Centro de Investigación Biomédica en Red de Cáncer (CIBERONC), Barcelona, Spain.
3. Gastrointestinal Stem Cell Biology Lab, Wellcome Centre Human Genetics, University of Oxford, Oxford, UK.
4. Institute for Bioengineering of Catalonia (IBEC), The Barcelona Institute of Science and Technology (BIST), Barcelona, Spain.
5. CNAG-CRG, Centre for Genomic Regulation, The Barcelona Institute of Science and Technology (BIST), Barcelona, Spain.
6. Universitat Pompeu Fabra (UPF), Barcelona, Spain.
7. Facultat de Medicina, Universitat de Barcelona, Barcelona, Spain.
8. Centro de Investigación Biomédica en Red en Bioingeniería, Biomateriales y Nanomedicina (CIBER-BBN), Barcelona, Spain.
9. Institució Catalana de Recerca i Estudis Avançats (ICREA), Barcelona, Spain.
10. Digestive Oncology, Department of Oncology, Katholieke Universiteit Leuven, Leuven, Belgium.
11. Department of Cell Biology, Radboud Institute for Molecular Life Sciences, Radboud University Medical Center, Nijmegen, The Netherlands.
12. Translational Gastroenterology Unit, John Radcliffe Hospital, University of Oxford and Oxford National Institute for Health Research Biomedical Research Centre, Oxford, UK.

Corresponding author: Eduard Batlle

**30-40% of colorectal cancer (CRC) patients undergoing curative resection of the primary tumor will develop metastases in the following years<sup>1</sup>. Therapies to prevent disease relapse remain an unmet medical need. Here we uncover the identity and features of the residual tumor cells responsible for CRC relapse. Analysis of single-cell transcriptomes of CRC patient samples revealed that the majority of poor prognosis genes are expressed by a unique tumor cell population that we named High Relapse Cells (HRCs). We established a human-like mouse model of microsatellite stable CRC that undergoes metastatic relapse following surgical resection of the primary tumor. Residual HRCs occult in mouse livers after primary CRC surgery gave rise to multiple cell types over time, including Lgr5+ stem-like tumor cells<sup>2-4</sup>, and caused overt metastatic disease. Using *Emp1* (epithelial membrane**

44 protein 1) as a marker gene for HRCs, we tracked and selectively eliminated this cell  
45 population. Genetic ablation of Emp1-high cells prevented metastatic recurrence and mice  
46 remained disease-free after surgery. We also discovered that HRC-rich micrometastases  
47 were T-cell infiltrated yet became progressively immune-excluded during outgrowth.  
48 Treatment with neoadjuvant immunotherapy eliminated residual metastatic cells and  
49 saved mice from relapsing after surgery. Together, our findings reveal the cell-state  
50 dynamics of the residual disease in CRC and anticipate that therapies targeting HRCs may  
51 help avoid metastatic relapse.

52

## 53 MAIN

### 54 *The CRC poor prognosis transcriptome*

55 Surgical resection of the primary CRC effectively cures most patients diagnosed with locoregional  
56 disease<sup>1</sup>. However, about 5% of AJCC Stage I, 15% of Stage II and 40% of Stage III patients will  
57 develop metastases over the following years<sup>1</sup>. We and others have previously shown that the vast  
58 majority of genes that predict high risk of disease relapse in CRC are expressed by cells of the  
59 tumor microenvironment (TME), particularly by cancer-associated fibroblasts (CAFs)<sup>5-7</sup>. To  
60 further investigate this finding, we sought to map the expression of the poor prognosis CRC  
61 transcriptome at the single-cell level. Using a large pooled transcriptomic cohort of primary CRC  
62 samples (n=1830 stage I-III CRC, Supplementary Table 1), we identified 2530 genes that  
63 predicted disease relapse (HR>1, p-val<0.05) (Fig. 1a). Subsequently, the expression of this poor  
64 prognosis geneset was analyzed in two independent single cell RNA sequencing (scRNAseq)  
65 CRC datasets that included both tumor epithelial and microenvironment cells; 20 patients  
66 corresponding to the Samsung Medical Center (SMC) cohort and 7 patients from the Katholieke  
67 Universiteit Leuven (KUL) cohort<sup>8</sup> (Fig. 1b-d and Extended Data Fig. 1a-c). Supporting our  
68 previous findings, CAFs, endothelial cells and, to a lower extent, myeloid cells expressed the  
69 highest levels of poor prognosis genes (Fig. 1b and Extended Data Fig. 1a). However, detailed  
70 analysis of the recurrence geneset in specific cell populations purified from primary CRC patient  
71 samples (tumor cells/EPCAM+, leukocytes/CD45+, endothelial cells/CD31+ and CAFs/FAP+)<sup>6</sup>  
72 revealed that 99 out of the 2530 genes were upregulated in epithelial tumor cells compared to  
73 TME cells (Fig. 1a and Supplementary Table 2). Indeed, these 99 recurrence-associated genes  
74 (from now on named EpiHR for Epithelial-specific high-risk geneset), showed epithelial tumor cell-  
75 restricted expression patterns in the SMC (Fig. 1d) and KUL (Extended Data Fig. 1c) scRNAseq  
76 cohorts. EpiHR expression levels predicted recurrence with an accuracy equivalent to the subset  
77 of poor prognosis genes expressed in the tumor microenvironment (Fig. 1e). In multivariate

78 analysis including the two signatures and clinical variables, the TME-HR and EpiHR genesets  
79 were independent prognostic factors (EpiHR: HR (+1 SD) = 2.26, p-val=1.2x10<sup>-7</sup>; TME-HR: HR  
80 (+1 SD) =1.74, p-val=8x10<sup>-4</sup>). The EpiHR signature was significantly associated with right-side  
81 colon cancer and to AJCC Stages III-IV (Extended Data Fig. 1d). In addition, it stratified CRC  
82 patients within each consensus molecular subtype<sup>9</sup> (CMS) into high and low risk of relapse  
83 (Extended Data Fig. 1e). Thus, the EpiHR geneset encodes determinants of disease relapse with  
84 epithelial tumor cell-specific expression.

85

### 86 **Identification of EpiHR+ tumor cells**

87 Representation of tumor epithelial CRC cells using Uniform Manifold Approximation and  
88 Projections (UMAPs) showed that 18 out of 27 CRCs contained cells labeled with the EpiHR  
89 geneset in proportions ranging from 1.4% to 98.1% (Fig. 1f-h and Extended Data Fig. 1f,g). We  
90 named this tumor cell population HRCs (for High Relapse Cells). Analysis of the EpiHR signature  
91 revealed a large number of highly correlated genes exhibiting overlapping expression in HRCs  
92 (Gene clusters 1 and 3 in Extended Data Fig. 1h,i and Supplementary Table 2). The EpiHR only  
93 contains epithelial-specific genes, reflecting only a fraction of the HRC transcriptome. We further  
94 identified a core gene expression program upregulated in HRCs of most tumor samples  
95 (Extended Data Fig. 2a-b and Supplementary Table 2). HRCs belonging to different CRCs  
96 displayed a shared enrichment pattern of annotated genesets, implying that they co-opt a similar  
97 phenotype and play equivalent functions (Extended Data Fig. 2c-d). Differential expression  
98 analysis of HRCs versus non-HRCs revealed prominent enrichment in genes related to hypoxia,  
99 cell-to-cell adhesion, extracellular matrix, actin cytoskeleton and regulation of cell migration (Fig.  
100 1i). Amongst them (Supplementary Table 2), the collagen sensing receptor DDR1, the integrins  
101  $\alpha 2$ ,  $\alpha 3$  and  $\beta 4$  or the protease PLAUR have been repeatedly associated with tumor cell invasion,  
102 extravasation and metastasis in multiple cancer types. Incidentally, we also discovered that the  
103 signature of basal-like pancreatic cancer cells<sup>10</sup> marked both human and mouse HRCs suggesting  
104 that they adopt a state akin to the most aggressive subtype of pancreatic cancer (Extended Data  
105 Fig. 2e and Supplementary Table 3). Further reinforcing our observations, most scRNAseq  
106 samples containing abundant EpiHR+ cells were stage III and IV CRCs (Fig. 1j – p=0.051 Stage  
107 I+II versus III+IV).

108

109 Widespread evidence has demonstrated that CRC growth is driven by a subset of LGR5+ stem  
110 cell-like tumor cells<sup>2-4</sup>. However, our analyses revealed that HRCs represent a distinct cell  
111 population, shown by their mutually exclusive distribution in UMAPs (Fig. 1k-l, Extended Data Fig.

112 2f-g). Quantification showed that only one tumor sample exhibited a significant number of HRCs  
113 co-expressing the LGR5 signature (7.79% sample SMC04, Fig. 1h) whereas five others included  
114 a minimal fraction (<3%) of cells marked by both *LGR5* and the HRC gene programs. The  
115 expression patterns of several WNT/intestinal stem cell marker genes confirmed that HRCs were  
116 not LGR5+ stem-like tumor cells (Extended Data Fig. 2h-o). Indeed, a subset of CRCs exhibited  
117 marginal WNT target gene expression levels (Extended Data Fig. 2p-q) yet contained HRCs  
118 (identified with an \* in Fig. 1h). Furthermore, HRCs represented a subset of cells in both epithelial  
119 intrinsic consensus molecular CRC subtypes iCMS2 and iCMS3<sup>11</sup> (Extended Data Fig. 2r).

120

121 We previously described that mice bearing mutations in *Apc*, *Kras*, *Tgfbr2* and *p53* (AKTP) in  
122 Lgr5+ ISCs develop human-like metastatic CRCs<sup>12</sup>. We analyzed CRCs generated by  
123 implantation of AKTP mouse tumor organoids (MTOs) in the caecum of c57BL/6 mice by  
124 scRNAseq (Fig. 1m-o). Mirroring the observations in human tumor samples, we found that mouse  
125 CRCs contained abundant HRCs and that this population did not express the Lgr5+ ISC-like  
126 expression program (Fig. 1m-o and Extended Data Fig. 2s). HRCs were enriched in similar gene  
127 categories in both species, including the pancreatic basal-like signature, implying functional  
128 equivalence (Fig. 1i and Extended Data Fig. 2s-t). Bulk RNA sequencing analysis of our MTO  
129 biobank<sup>12</sup> showed elevated EpiHR and coreHRC gene signatures in AKTP MTOs derived from  
130 metastases compared to those established from primary CRCs (Extended Data Fig. 2u).

131

### 132 **Dynamics of metastatic cell states**

133 We developed a new mouse model of metastatic relapse that allowed us to investigate the  
134 contribution of HRCs to metastatic recurrence. In brief, we innovated classical needle-based  
135 orthotopic injections by relocating them to the tip of the caecum, which allowed complete surgical  
136 excision of singular invasive CRCs (Fig. 2a, Extended Data Fig. 3a-c and Supplementary Video).  
137 Dual GFP/Luciferase-labelled AKTP MTOs grew rapidly in the caecum of c57BL/6 mice, colonized  
138 the adjacent mucosa and generated invasive cancers (Extended Data Fig. 3a,b).  
139 Bioluminescence imaging (BLI) revealed that mice remained free of primary disease after surgical  
140 resection yet, over the following days, they relapsed in the form of liver metastases (Fig. 2b,c and  
141 Extended Data Fig. 3d-e). Occasionally, we also observed metastases in mesenteric lymph  
142 nodes, lungs, peritoneum and diaphragm (Extended Data Fig. 3f-h). Primary tumor resection  
143 shortly after implantation cured all mice, whereas surgery at later points resulted in increased  
144 proportions of mice developing metastatic recurrences (Fig. 2b). In experiments of early primary  
145 tumor resection (day 11-15), faint bioluminescence could be detected ex vivo in some livers

146 immediately after surgery, implying the presence of residual disseminated tumor cells. Lightsheet  
147 3D fluorescence imaging revealed 3 to 10-cell micrometastases at the time of resection (Fig. 2d).  
148 Based on these observations, we established 4-5 weeks post-implantation as the optimal  
149 timepoint to enable a complete surgical resection of the primary CRC. We also developed a CRC  
150 relapse model based on the implantation of AKP MTOs in the caecum. These triple mutant CRCs  
151 exhibited delayed kinetics of metastatic recurrence after surgical extirpation of the primary CRC  
152 (Extended Data Fig. 3i).

153

154 We next sought to profile tumor cells along the process of relapse. Isolation of residual tumor cells  
155 from large organs has been historically a major hurdle in cancer research<sup>13</sup>. We devised a tissue  
156 dissociation strategy that enriched for residual tumor cells from whole liver samples (Extended  
157 Data Fig. 3j). In brief, we discovered that during tissue preparation for FACS, the vast majority of  
158 luciferase+ tumor cells were retained in 100  $\mu$ m filters after mild enzymatic digestions, whereas  
159 most parenchymal liver cells flowed through in these conditions (Extended Data Fig. 3k,l). By re-  
160 digesting cells retained in the filter, we obtained a 400-fold GFP-Luciferase+ enriched metastatic  
161 tumor cell preparation (Extended Data Fig. 3m). This step allowed purification of residual tumor  
162 cells from individual livers exhibiting absent or very low *ex vivo* bioluminescence (Extended Data  
163 Fig. 3n). By means of this approach, we profiled by Smart-seq2 scRNAseq 900 GFP+ tumor cells  
164 derived from livers collected at different time points after implantation of MTOs as well as from  
165 their corresponding primary CRCs (Fig. 2e). We confirmed the presence of micrometastases,  
166 small metastases or macrometastases by bioluminescence measurements in the resected livers  
167 (Extended Data Fig. 3n).

168

169 UMAP representation showed that tumor cells from primary tumors and metastases overlapped  
170 to a large extent (Fig. 2e,f and Extended Data Fig. 4). Hierarchical clustering analysis identified  
171 six cell clusters (Fig. 2g and Extended Data Fig. 4b, c). Cluster 0 included cells that expressed  
172 elevated levels of proliferation and biosynthesis-encoding genes (Fig. 2g and Extended Data Fig.  
173 4b, c). Lgr5+ ISC-like tumor cells occupied two different clusters depending on high (cluster 1)  
174 and low (cluster 2) expression levels of the Ki67 proliferative signature<sup>14</sup> (Fig. 2g and Extended  
175 Data Fig. 4c). Tumor cells of cluster 3 upregulated the differentiation marker *Krt20*. Clusters 4 and  
176 5 were largely enriched in HRCs. Some cells in cluster 4 expressed *Krt20* suggesting that HRCs  
177 can also undergo differentiation (Fig. 2g and Extended Data Fig. 4b, c). Quantification of cell types  
178 revealed a dynamic distribution of cell populations across the metastatic relapse process (Fig.  
179 2h). Primary CRCs and macrometastases exhibited similar distribution of cell populations,

180 including proliferative cells, Lgr5+ ISC-like cells, Krt20+ differentiated tumor cells and HRCs, most  
181 of which were also Krt20+ (Fig. 2h). In contrast, micrometastases were largely enriched in  
182 undifferentiated (Krt20-) HRCs and also contained abundant proliferative cells (Fig. 2h). Small  
183 metastases were mainly formed by Lgr5+ ISC-like cells in both Ki67+ and Ki67- states and  
184 contained fewer HRCs than micrometastases (Fig. 2h and Extended Data Fig 4d).

185

186 The computational trajectory inference algorithm CellRank<sup>15</sup> predicted diverse hierarchical  
187 organizations during metastatic progression. In primary CRCs, proliferative Lgr5-neg tumor cells  
188 gave rise to Lgr5+ cells and HRCs (Fig. 2i-l). In macrometastases, the apex of the hierarchy was  
189 occupied by proliferative Lgr5+ ISC-like cells, which generated HRCs over time (Fig. 2q-t). In  
190 contrast, the algorithm prognosticated that the cells that initiate the cellular hierarchy of  
191 micrometastases corresponded to undifferentiated HRCs in cluster 5 (Fig. 2m-p and Extended  
192 Data Fig 4e). This cell population gave rise to Lgr5+ ISC-like and proliferative tumor cell progeny  
193 (Fig. 2m-p), which are abundant in small metastases (Fig. 2h and Extended Data Fig. 4d).

194

195 We made equivalent observations in AKP CRCs (Extended Data Fig. 4f-p). Abundant HRCs  
196 characterized liver AKP lesions profiled at early time points (day 35 post-implantation), whereas  
197 micrometastases collected later (day 70) contained a larger proportion of Lgr5+ cells (Extended  
198 Data Fig. 4f-k). Micrometastatic Lgr5+ cells in the AKP model expressed high levels of the  
199 signature of latent Mex3a+ cells (Extended Data Fig. 4l-n), which is in agreement with our  
200 previous study on the specification of this population in triple mutant CRCs<sup>16</sup>. CellRank also  
201 predicted HRCs as the origin of micrometastasis in the AKP CRCs (Extended Data Fig. 4o,p).

202

### 203 **Characterization of HRC features**

204 A comparison of human and mouse scRNAseq datasets revealed that a large subset of core  
205 genes were expressed consistently by HRCs of the two species (Extended Data Fig. 5a). Among  
206 them, we focused on EMP1 because it was expressed at high levels in HRCs and exhibited a  
207 large degree of overlap with the expression of the EpiHR geneset in both human (Extended Data  
208 Fig. 5b-c) and AKTP mouse CRCs (Fig. 3a and Extended Data Fig. 5d). Echoing our results with  
209 the EpiHR signature, CellRank predicted that the cell origin of metastatic relapse in AKTP  
210 (Extended Data Fig. 5e-g) and AKP (Extended Data Fig. 5h,i) tumors expressed elevated *Emp1*  
211 levels.

212

213 We thus leveraged *Emp1* to track HRCs during disease relapse. To this end, we knocked-in an  
214 inducible-Caspase9-tdTomato (iCT) cassette<sup>2</sup> into the *Emp1* locus of AKTP MTOs using  
215 CRISPR-Cas9 (Fig. 3b). Inspection of knock-in MTOs revealed high tdTomato (TOM) expression  
216 in a subset of tumor cells (Fig. 3b). We next inoculated *Emp1*-iCT AKTP MTOs into the caecum  
217 of c57BL/6 mice. TOM expression in dissociated epithelial tumor cells measured by flow  
218 cytometry revealed heterogeneity in *Emp1* expression (Extended Data Fig. 5j). TOM-high cells  
219 purified by Fluorescence-activated single cell sorting (FACS) showed large upregulation of *Emp1*  
220 expression (Extended Data Fig. 5k). In contrast, TOM-low cells were characterized by expression  
221 of intestinal stem cell (ISC)-specific genes such as *Lgr5* and *Smoc2* (Extended Data Fig. 5k).  
222 Gene expression profiling confirmed elevated levels of the EpiHR and coreHRC signatures in  
223 *Emp1*-TOM-high cells, whereas the WNT/*Lgr5*+ ISC program was downregulated in these cells  
224 (Fig. 3c,d and Extended Data Fig. 5l).

225

226 Inspection of tissue sections evidenced that cancer cells invading the muscular layer were  
227 strongly labeled by the fluorescent reporter (Fig. 3e). In particular, isolated tumor buds and larger  
228 clusters in contact with the stroma at the edges on invasion fronts exhibited the highest TOM  
229 expression (Inset in Fig. 3e, Extended Data Fig. 6a-d). *Emp1*-TOM<sup>high</sup> cell clusters were often  
230 found in proximity to peripheral blood vessels in mouse primary CRCs, suggesting a connection  
231 with hematogenous or lymphatic dissemination (Extended Data Fig. 6e). CRCs generated by  
232 implantation of AKP MTOs in the caecum also exhibited *Emp1*-TOM<sup>high</sup> invasion fronts and tumor  
233 buds that overexpressed HRC-marker genes (Extended Data Fig. 6f-h).

234

235 We also examined livers of mice bearing AKTP tumors at various time points post-orthotopic MTO  
236 implantation. In samples collected at early time points, micrometastatic lesions trapped within  
237 portal veins and liver sinusoids were populated entirely by *Emp1*-TOM<sup>high</sup> cells (Fig. 3f-g and  
238 Extended Data Fig. 6i-j). Fitting the scRNAseq analyses, we identified two *Emp1*-TOM+ subsets;  
239 one expressed KRT20 and was located mainly in the tumor cores, whereas the other was  
240 positioned at invasion fronts, lacked KRT20 and expressed the highest levels of TOM reporter  
241 (Extended Data Fig. 6k). Liver *Emp1*-TOM<sup>high</sup> micrometastases were also KRT20 negative  
242 (Extended Data Fig. 6l). Of note, *Emp1*-TOM<sup>high</sup> tumor buds and micrometastases were labeled  
243 with EPCAM and E-CADHERIN, implying that they retained an epithelial organization (Extended  
244 Data Fig. 6 and Extended Data Fig. 7a). Analysis of epithelial-to-mesenchymal transition (EMT)  
245 master transcription factors showed equivalent expression levels in *Emp1*-TOM<sup>high</sup> and *Emp1*-  
246 TOM<sup>low</sup> cells (Extended Data Fig. 7b). scRNAseq also supported the lack of canonical EMT

247 markers in human and mouse HRCs (Extended Data Fig. 7c-d). However, we noticed that the  
248 coreHRC signature genes *LAMA3*, *LAMC2*, *ITGA2* and *PLAUR* belong to a recently characterized  
249 partial EMT gene expression module<sup>17</sup>. HRCs in mouse primary CRCs and micrometastases  
250 upregulated this partial EMT signature (Extended Data Fig. 4e). Of note, *LAMC2* has been  
251 previously identified as a specific marker for tumor budding in multiple tumor types, including  
252 CRC<sup>18</sup>, and we confirmed that its expression correlated with *EMP1* mRNA in CRC patient samples  
253 (Extended Data Fig. 7e,g). *KRT17*, a widely used marker of the basal pancreatic cancer subtype<sup>19</sup>,  
254 also marked *EMP1*<sup>high</sup> invasion fronts and tumor buds (Extended Data Fig. 7f,g). Gene Set  
255 Enrichment Analysis (GSEA) also revealed homophilic cell adhesion and apical junctions as  
256 central features of HRCs (Fig. 1l). Fittingly, *EMP1* encodes a component of the tight junctions<sup>20,21</sup>  
257 and there were multiple other constituents of adherent junction, tight junction and desmosome  
258 complexes upregulated in the core HRC program such as *PCDH1*, *DSC2*, *CLND4* and *JUP*  
259 (Extended Data Fig. 7g and Supplementary Table 2). The latter encodes Plakoglobin which  
260 mediates circulation of tumor cells as clusters and confers enhanced metastatic capacity to breast  
261 cancer cells<sup>22</sup>.

262

263 To further explore the relationship between *Emp1* and *Lgr5* expression, we engineered AKTP  
264 MTOs bearing both *Emp1*-iCT and *Lgr5*-EGFP knock-in reporter cassettes (Extended Data Fig.  
265 8a-f). Confocal imaging of dual labeled MTOs showed a mutually exclusive pattern of expression  
266 of the two reporters (Extended Data Fig. 8a) and RT-qPCR analysis confirmed upregulation of  
267 *Emp1* and *Lgr5* in sorted TOM+ and EGFP+ cells, respectively (Extended data Fig. 8b). Primary  
268 CRCs generated from inoculation of dual labeled MTOs in the caecum also exhibited a mutually  
269 exclusive expression pattern of *Emp1*-TOM and *Lgr5*-EGFP reporters (Fig. 3h and Extended Data  
270 Fig. 8c-d). *Emp1*-TOM<sup>high</sup> cells were largely enriched at tumor buds which, in contrast, contained  
271 few *Lgr5*-EGFP+ cells (Fig. 3i). RNA fluorescence in situ hybridization (FISH) analysis on human  
272 CRC patient samples also showed that *EMP1* expression was elevated at tumor invasion fronts,  
273 whereas *LGR5* marked the tumor cores in most cases (examples in Extended Data Fig. 8g-p).

274

275 Finally, we analyzed the livers of mice bearing primary CRCs. *Lgr5*-EGFP fluorescence was  
276 absent in disseminated tumor cells (DTCs) and micrometastases, but was progressively gained  
277 during metastatic outgrowth, in a marked antithetic pattern to *Emp1*-TOM expression (Fig. 3j-k  
278 and Extended data Fig. 8e-f). Together with CellRank bioinformatic predictions, these  
279 observations suggest that HRCs are endowed with the ability to migrate and disseminate to



280 foreign organs where they initiate metastatic outgrowth and subsequently give rise to non-HRC  
281 populations.

282

### 283 **Determinants of the HRC population**

284 The transcription factor YAP opposes the activity of the WNT pathway<sup>23,24</sup> and a YAP-driven gene  
285 program has been associated with tumor cell plasticity<sup>25,26</sup>, regeneration<sup>27</sup> and metastasis  
286 formation in CRC<sup>28</sup>. In addition, YAP promotes the conversion of LGR5+ CRCs cells to a fetal  
287 intestine-like progenitor state during chemotherapy<sup>16,25,29,30</sup>. Extended Data Fig. 9a,b shows the  
288 expression of the top 50 upregulated fetal intestine progenitor genes from Mustata et al.<sup>31</sup>, and  
289 the broadly used YAP\_22 target gene signature<sup>32</sup>. As a reference, we also show the expression  
290 of the Top 50 HRC core genes (Extended Data Fig. 9c). Only 3 out of 22 YAP core signature  
291 genes were upregulated in HRCs of CRC patients, whereas most bonafide YAP target genes,  
292 including *CTGF* and *CYR61*, were not (Extended Data Fig. 9a). HRCs only upregulated a few  
293 canonical markers of the regenerative fetal-like intestinal population, including *ANXA1* or  
294 *TACSTD2*, but the majority of them were either not expressed or expressed at low levels by HRCs  
295 (Extended Data Fig. 9b). We also found little overlap between the coreHRC and YAP\_22 or fetal  
296 intestinal progenitor signatures (Extended Data Fig. 9d). Emp1-TOM+ cells isolated from mouse  
297 primary CRCs were neither enriched in YAP target genes (Extended Data Fig. 9e-f). Therefore,  
298 there are only marginal similarities between YAP+/fetal intestinal progenitors and the HRC state.  
299 To obtain further insights into this question, we knocked down YAP levels using shRNAs in MTOs  
300 or blocked YAP-driven transcription by over-expressing an inducible dominant-negative TEAD  
301 transcription factor that inhibits both YAP and TAZ activity<sup>33</sup> (Extended Data Fig. 9g-m). These  
302 genetic manipulations decreased the levels of the canonical YAP-target genes *Ctgf* and *Cyr61*,  
303 but did not affect the expression of core HRC genes *Emp1* or *Lamc2* in MTOs, neither the  
304 abundance of Emp1-Tom-high cells (Extended Data Fig. 9g-m). As a control for these  
305 experiments, we used chemotherapy (Folfiri), which upregulated the YAP\_22 signature, including  
306 *Ctgf* and *Cyr61*, and the intestinal fetal progenitor program but did not induce the HRC state  
307 (Extended Data Fig. 9n,o).

308

309 Association analyses in the TCGA COAD cohort revealed a strong correlation between activating  
310 KRAS mutations and EpiHR expression levels (Fig. 3l). Using a series of mouse organoids with  
311 compound mutations in main CRC driver genes engineered by means of CRISPR/Cas9 (CRISPR  
312 Tumor Organoids or CTOs), we confirmed that genotypes containing KRAS G12D mutations  
313 exhibited upregulation of coreHRC and EpiHR gene signatures (Fig. 3m and Extended Data Fig.

314 10a,b). We next searched for associations between HRCs and TME composition using the  
315 scRNAseq CRC patient dataset. This analysis exposed a direct correlation between CAFs and  
316 HRCs abundance (Fig. 3n). Consistent with this finding,  $\alpha$ -SMA+ CAFs surrounded Emp1-  
317 TOM<sup>high</sup> cells in primary AKTP CRCs (Fig. 3o). Co-culture of AKTP MTOs with CAFs augmented  
318 6-fold Emp1-TOM+ cell numbers (Fig. 3p), but YAP knockdown failed to block this effect  
319 (Extended Data Fig. 10c). Expression profiling of MTO cells isolated from co-cultures  
320 demonstrated upregulation of EpiHR, coreHRC and basal pancreatic cancer signature levels (Fig.  
321 3q-r and Extended Data Fig. 10d). Furthermore, it was evident an arrangement of tumor cell types  
322 reminiscent of the *in vivo* organization; Lgr5-EGFP cells were positioned at the organoid center,  
323 whereas Emp1-TOM+ cells relocated to the boundaries in contact with the fibroblast population  
324 (Fig. 3s and Extended Data Fig. 10e). Fibroblasts surrounding MTOs appeared activated, as  
325 shown by the expression of  $\alpha$ -SMA (Extended Data Fig. 10f). We also noticed that some  
326 organoids gained expression of the pancreatic cancer basal cell marker KRT17 (Extended Data  
327 Fig. 10g).

328

### 329 **Relapse by residual EMP1+ cells**

330 We next leveraged the inducible Caspase9 cassette inserted in the *Emp1* locus to perform cell  
331 ablation experiments in intact tumors (Fig. 4a,b)<sup>2,34</sup>. Inoculation of mice with AP20187 dimerized  
332 the chimeric Caspase9 expressed under the *Emp1* locus and specifically killed cells expressing  
333 the highest levels of Emp1-TOM reporter (Fig. 4c-e). This effect was reversible, shown by a slow  
334 but progressive recovery of the Emp1-TOM-high cell population at invasion fronts upon AP20187  
335 dimerizer (DIM) treatment cessation (Extended Data Fig. 10h-j). DIM treatment was only  
336 administered during primary tumor growth but was ceased the day before primary CRC resection  
337 (Fig. 4b). Macrometastases were not yet present when DIM treatment finished; therefore, this  
338 experimental setting aimed at ablating Emp1<sup>high</sup> cells in the primary tumor and possibly in incipient  
339 metastatic lesions. Remarkably, while DIM treatment did not affect primary tumor growth (Fig. 4f),  
340 the majority of mice showed no signs of liver and lung metastatic recurrence and were disease-  
341 free at experimental endpoints (Fig. 4g,h and Extended Data Fig. 10k). We made equivalent  
342 observations in AKTP CRC growing in nude mice, thus ruling out that genetic cell ablation strategy  
343 impaired metastatic progression through activation of the adaptive immune system (Extended  
344 Data Fig. 10l-n). When Emp1<sup>high</sup> cell ablation started one week after primary CRC resection, we  
345 observed no changes in metastatic progression and all mice suffered metastatic relapse (Fig. 4i,j).  
346 Emp1<sup>high</sup> cell ablation neither halted metastasis formation when MTOs were directly inoculated in  
347 the liver through the spleen (Fig. 4k,l). Reinforcing this observation, we found that intrasplenic

348 inoculation of Emp1<sup>high</sup> cells isolated from MTOs generated more and larger liver metastases than  
349 either Lgr5<sup>high</sup> cells or Emp1<sup>low</sup>/Lgr5<sup>low</sup> cells but the difference was not substantial, suggesting that  
350 all these tumor cell populations hold metastasis initiating capacity in this assay (Extended Data  
351 Fig. 10o-r). Moreover, metastases produced by these three cell populations contained the other  
352 tumor cell types owing to extensive cell plasticity (Extended Data Fig. 10s). Overall, these data  
353 demonstrate that Emp1<sup>high</sup> HRCs drive metastatic relapse after primary CRC resection, yet they  
354 are dispensable after metastatic seeding is completed. This model is further supported by the  
355 observation that HRC ablation just after surgery and during metastatic outgrowth decreased the  
356 number of small size metastasis very significantly, but did not modify the frequency of large  
357 metastases (Extended Data Fig. 10t-w).

358

359 Despite the slow-growing metastatic lesions generated by the AKP CRCs, HRC ablation before  
360 primary tumor surgery also prevented metastatic recurrence in these triple mutant models  
361 (Extended Data Fig. 11a-c). In addition, we demonstrated that HRCs mediated recurrence in  
362 CRCs bearing Smad4 mutations (AKPS) (Extended Data Fig. 11d-f). To extend our observations  
363 beyond the colon-to-liver metastasis axis, we implanted AKTP MTOs in the rectum, which  
364 generated invasive rectal cancers that, as in humans, metastasized preferentially to the lungs  
365 (Extended Data Fig. 11g-k). Inspection of lung metastases revealed that, akin to liver metastases,  
366 micrometastases were mostly Emp1<sup>high</sup>, whereas larger metastases decreased the percentage of  
367 Emp1<sup>high</sup> cells (Extended Data Fig. 11i). Although we could not surgically resect mouse rectal  
368 tumors, ablation of Emp1<sup>high</sup> cells caused a 20-fold reduction in lung metastasis burden in this  
369 model (Extended Data Fig. 11k).

370

371 Using a diphtheria toxin receptor (DTR)-based ablation strategy in CRC models, it was previously  
372 shown that Lgr5<sup>+</sup> CRC cells are necessary for liver metastasis formation<sup>3</sup>. To assess the role of  
373 Lgr5<sup>+</sup> tumor cells in our relapse models, we knocked-in a DTR cassette into the *Lgr5* locus of  
374 AKTP MTOs (Extended Data Fig. 11l-m). Inoculation of this MTO line into the caecum further  
375 validated our previous observations that invasion fronts, tumor buds and micrometastases seldom  
376 contain Lgr5<sup>+</sup> cells (Extended Data Fig. 11n-q). More importantly, treatment with Diphtheria toxin  
377 (DT) before surgical removal of the primary CRC effectively eliminated Lgr5<sup>+</sup> cells (Fig. 4m-p),  
378 yet it did not prevent disease relapse and mice developed overt liver metastatic disease (Fig. 4q-  
379 s). Thus, Lgr5<sup>+</sup> cells are dispensable for dissemination and metastatic colonization. We validated  
380 these results using an independent AKTP MTO line engineered with an iCaspase9-tdTomato  
381 (iCT) cassette knocked-in in the *Lgr5* locus (Extended Data Fig. 11r-t). Again, effective ablation

382 of Lgr5+ cells in the iCT model (Extended Data Fig. 11u-w) neither altered CRC tumor growth  
383 (Extended Data Fig. 11x) nor prevented metastatic recurrence (Extended Data Fig. 11y). On the  
384 other hand, ablation of Lgr5+ cells after direct inoculation of MTOs in the liver through the portal  
385 vein halted metastasis formation (Fig. 4t, u), further supporting a requirement for Lgr5+ cells  
386 during metastatic outgrowth<sup>3</sup>.

387

### 388 **Neoadjuvant immunotherapy avoids relapse**

389 We previously showed that mouse primary AKTP CRCs are models of microsatellite stable  
390 (MSS)/mismatch repair proficient CRCs characterized by a relatively low mutational burden,  
391 abundant stroma cells and T cell exclusion<sup>12</sup>. Transplantation of AKTP MTOs in caecum also gave  
392 rise to T-cell excluded CRCs (Extended Data Fig. 12a). CAFs surrounded *Emp1*-expressing  
393 invasion fronts and tumor buds, but T cells did not reach these structures and remained at the  
394 tumor periphery (Extended Data Fig. 12b). In contrast, liver micrometastases generated by these  
395 primary CRCs exhibited high CD3+ cell density (Fig. 5a). The lack of T cell exclusion was evident  
396 and we could visualize T cell-HRC interactions in these early lesions (Fig. 5b). However,  
397 metastatic outgrowth was accompanied by a gradual decline of CD3+ cells and the relocalization  
398 of T cells to the periphery (Fig. 5c,d). Multiplex immunohistochemistry showed that most infiltrating  
399 T cells were CD4+/FOXP3- (Examples in Fig. 5e and quantification in Fig. 5g and Extended Data  
400 Fig. 12c). T cell exclusion coincided with progressive CAFs ( $\alpha$ -SMA+ and/or POSTN+) and  
401 Macrophage (CD68+) recruitment to the metastatic TME (Fig. 5f,g and Extended Data Fig. 12c).

402

403 scRNASeq revealed elevated expression of interferon-alpha and -gamma target genes in  
404 undifferentiated (Krt20-) HRCs (Fig. 5h and Supplementary Table 4), >95% of which belong to  
405 micrometastatic lesions, suggestive of an ongoing inflammatory response as HRCs reach the  
406 liver. Indeed, undifferentiated HRCs upregulate multiple interferon response genes compared to  
407 the other tumor cell populations in primary CRCs and large metastases (Extended Data Fig. 12d).  
408 It was also apparent that HRCs in micrometastases expressed elevated *Cd274* (that encodes PD-  
409 L1 ) and *Ido1* levels, two negative regulators of the immune response (Extended Data Fig. 12d).  
410 Flow cytometry confirmed elevated PD-L1 expression at the surface of micrometastatic CRC cells  
411 and a progressive decline over subsequent outgrowth (Fig. 5i,j). Based on these findings, we  
412 hypothesized that at the onset of organ colonization, lack of a mature TME exposes HRCs to the  
413 adaptive immune system, yet disseminated cells bypass immune attack through the expression  
414 of immune-modulatory molecules. To test the susceptibility of micrometastatic disease to  
415 immunotherapy, we treated mice with anti-PD1 in combination with anti-CTLA4 antibodies in the

416 neoadjuvant setting, i.e., before the primary tumor was extirpated by surgery (Fig. 5k-p). This  
417 approach increased CD8+ cytotoxic T cell numbers in the primary CRC (Fig. 5l,m) but we did not  
418 observe alteration of the tumor growth rate (Extended Data Fig. 12e) or curative effects on the  
419 primary disease at experimental endpoints (Fig. 5n). Yet, remarkably, most of these mice did not  
420 develop metastasis after surgical removal of the primary CRC and remained disease-free at  
421 experimental endpoints (Fig. 5o,p). We obtained similar results with neoadjuvant anti-PD1  
422 monotherapy (Extended Data Fig. 12f-i). In contrast, the same regime applied two weeks after  
423 surgery (i.e., late anti-PD1/CTLA4 immunotherapy) did not stop metastatic outgrowth (Fig. 5q-s),  
424 which is in line with the failure of checkpoint immunotherapy observed in patients with metastatic  
425 MSS CRC<sup>35-37</sup>. Hence, during a temporal window after metastatic colonization, immunotherapy is  
426 effective in eliminating the residual disease and preventing subsequent metastatic relapse.

427

## 428 **DISCUSSION**

429 HRCs represent a defined cell state in a large proportion of patient samples implying a common  
430 origin and mechanism of metastatic recurrence across CRC genotypes and molecular subtypes.  
431 Pioneering work by de Sauvage and colleagues revealed that Lgr5+ cancer stem cells are  
432 dispensable for primary CRC growth yet necessary for metastasis formation in experimental  
433 models<sup>3</sup>. Subsequently, Van Rheenen and colleagues proposed that metastases are initiated by  
434 disseminated differentiated tumor cells that, through plasticity, produce Lgr5+ cancer stem cells  
435 upon reaching the liver<sup>38</sup>. Massagué and colleagues also provided evidence that expression of  
436 the adhesion molecule L1CAM in LGR5+ and LGR5- cells is important for the regenerative burst  
437 that follows metastatic colonization<sup>39</sup>. We unequivocally show that HRCs are a subset of LGR5  
438 negative cells yet they are neither differentiated nor stem-like but rather co-opt a distinct state that  
439 enables migration and colonization of foreign organs. KRAS mutations, cross-talk with stromal  
440 fibroblasts and other environmental stimuli such as hypoxia directly instruct HRCs at invasion  
441 fronts. The finding that HRCs are enriched in tumor buds strengthens the well-established  
442 association of these anatomic structures with poor prognosis<sup>40,41</sup>. In addition, a defining feature  
443 of the HRC state is the upregulation of genes encoding cell-to-cell adhesion molecules. We  
444 therefore speculate that HRCs may extravasate as cell clusters and colonize foreign organs as  
445 oligocellular structures rather than as single cells as previously shown for other cancer types<sup>22,42</sup>.  
446 Our data fit with a model whereby HRCs disseminate out of the primary tumor prior to surgical  
447 resection and the HRC state is subsequently retained in residual tumor cells lodged in foreign  
448 organs. Reacquisition of the Lgr5+ stem cell and proliferation programs occur at a later phase  
449 and is necessary for metastatic outgrowth (Fig. 5t). Ablation of HRCs in primary tumors prevents

450 the vast majority of metastatic relapses. Yet, it is formally possible that other tumor cell  
451 populations, including Lgr5+ cells, may generate metastasis if they reach foreign organs, as  
452 suggested by experiments of direct inoculation of tumor cells into the blood stream performed  
453 herein and elsewhere<sup>3,28,38,39</sup>. Our data also indicate that YAP activity is not required for the  
454 specification of HRCs in primary CRCs, although do not rule out a role for YAP during the  
455 metastatic cascade as previously proposed<sup>28</sup>.

456

457 Immune-checkpoint therapy does not exert therapeutic benefits in MSS/mismatch repair-  
458 proficient overtly metastatic CRCs<sup>35-37</sup>. Besides the lower neoantigen burden of MSS CRCs, data  
459 in experimental models and patient samples indicate that the TME of MSS CRCs excludes and  
460 limits the activity of T-cells<sup>12,43</sup>. Our findings reveal that residual metastatic cells lodged in foreign  
461 organs lack a mature TME and are susceptible to the attack of the adaptive immune system upon  
462 immunotherapy treatment. This window of vulnerability could be exploited to prevent metastatic  
463 relapse. Our results back up current efforts to use neoadjuvant immunotherapy in early-stage  
464 CRC patients<sup>44</sup>. This and other therapeutic strategies capable of eliminating HRCs may prevent  
465 disease relapse if applied before metastatic disease is overt. The CRC relapse mouse model  
466 described herein may serve as a powerful pre-clinical platform for testing such therapies.

467 **DATA AVAILABILITY**

468 All data relevant to this study are available from the corresponding author upon reasonable  
469 request. Expression arrays and RNA-seq data are available at Gene Expression Omnibus (GEO).  
470 The accession number for gene expression sequencing experiments reported in this paper are  
471 GEO: GSE190055 (Arrays Emp1-high vs Emp1-low AKTP tumor cells), GSE208139 (Arrays  
472 MTOs co-cultured with fibroblasts), GSE207974 (RNAseq chemotherapy) and GSE207668  
473 (RNAseq CTOs). Count matrices for single cell RNAseq experiments were deposited in  
474 ArrayExpress under accession number E-MTAB-11284 (10X AKTP primary tumors) E-MTAB-  
475 11302 (Smart-seq metastatic progression) and [E-MTAB-11981](#) (Smart-seq AKP micromets).  
476 Additional metadata and processed data files, including UMAP embeddings and gene signature  
477 scores, are available at Synapse (syn35000645). Source data are provided with this paper.

478

479 **ACKNOWLEDGEMENTS**

480 We thank all members of the laboratory for their support and discussions. We are grateful for the  
481 outstanding assistance by IRB Barcelona core facilities for biostatistics, histopathology, functional  
482 genomics and advanced digital microscopy, as well as the flow cytometry, animal facilities of the  
483 UB/PCB, and the CRG genomic unit. We are indebted to the HCB-IDIBAPS Biobank for sample  
484 and data procurement. Sample collection of this work was also supported by the Xarxa de Bancs  
485 de Tumors de Catalunya (XBTC) sponsored by Pla Director d'Oncologia (PDO). AC-S, GT and  
486 LJ-G have held FPU fellowships from Spanish Ministry of Universities and AA-V a La Caixa  
487 predoctoral fellowship. SC holds a FPI fellowship from Spanish Ministry of Economy and  
488 Competitiveness (MINECO). HH is a Miguel Servet (CP14/00229) researcher funded by the  
489 Spanish Institute of Health Carlos III (ISCIII) and the Agencia Estatal de Investigación (AEI) and  
490 FEDER (SAF2017-89109-P). This work has been supported by ERC advanced grants 884623  
491 (residualCRC to EB) and 883739 to (Epifold to XT); LCF/PR/HR19/52160018 from La Caixa  
492 foundation; PID2020-119917RB-I00 from Spanish MICINN; and CRUK Accelerator Award  
493 C7932/A26825 (ACRCelerate), in collaboration with AECC (grant GEACC19006BAT\_2021). EB,  
494 XT and HH are supported by the Fundació La Marató de TV3 (201903-30-31-32). HH received  
495 support for the project PID2020-115439GB-I00- funded by MCINN/AEI/10.13039/501100011033.  
496 SL was supported by a Wellcome Trust (Senior Clinical Research Fellowship (206314/Z/17/Z)),  
497 EJM is funded by the Lee Placito Medical Research Fund (University of Oxford). IRB Barcelona  
498 and IBEC are recipients of a Severo Ochoa Award of Excellence from MINECO. Single cell  
499 profiling of CRC samples was supported by the Belgian Federation against Cancer grant nos.  
500 2018-127 and 2016-133 and by a grant from Fondation Roi-Baudouin. S.T. is supported by a

501 Fundamental Clinical Researchers KU Leuven grant and Foundation against Cancer grant for this  
502 work. Dedicated to Magdalena Socias Moyà, mother of Adrià Cañellas-Socias, who during her  
503 cancer illness hiked 110 km to raise funds for metastasis research at IRB Barcelona.

504

#### 505 **AUTHOR CONTRIBUTIONS**

506 AC-S designed and performed key experiments including the profiling of residual disease, the  
507 analyses of tumor buds and micrometastases, genetic ablation studies and immunotherapy  
508 experiments in the CRC relapse model. AC-S, CC, GT, FS and DS generated and characterized  
509 MTO knock-in lines. AC-S, XH-M, SP-P and GT developed the CRC relapse model. AC-S, XH-M  
510 and SP-P performed all mice work. LM and CS-OA analyzed scRNAseq data. CS-OA and AB-LL  
511 analyzed human CRC transcriptomic datasets. AC-M, LM and CS-OA performed statistical  
512 analyses. CC and TS performed IF and imaged organoids in vitro. AC-S, CC and OR generated  
513 and characterized YAP KD models. AC-S, CC, OR, SC and XT performed in vitro co-cultures.  
514 AC-S and AA-V quantified immunofluorescence stainings. AC-S and NF developed the method  
515 to purify residual tumor cells in whole livers. MS performed IF and IHC. EM and SL performed  
516 multiplex IF. LN performed chemotherapy experiments. LB and JC performed 3D lightsheet  
517 imaging. LJ-G, CC, PL and HH provided support with scRNAseq experiments. ST generated  
518 single cell RNA sequencing data from CRC patient samples. DVFT and DS generated MTO and  
519 CTO biobanks. ES provided strategic support and helped with figures and manuscript writing. EB  
520 supervised the study.

521

#### 522 **COMPETING INTEREST**

523

524 The authors declare no competing financial interests.

525

#### 526 **ADDITIONAL INFORMATION**

527 Correspondence and requests for materials should be addressed to Eduard Batlle  
528 ([eduard.batlle@irbbarcelona.org](mailto:eduard.batlle@irbbarcelona.org)).

529

530

531

532

533

534

535



536 **FIGURE LEGENDS.**

537 **Fig. 1 | Identification of poor prognosis epithelial CRC cells**

538 **a**, Identification of TME-HR and EpiHR signatures in a metacohort of 7 pooled human stage I-III  
539 CRC datasets (n= 1830 patients, Supplementary Table 1). **b-d**, UMAP layout of whole tumors  
540 (stroma + epithelium cells) belonging to the SMC dataset, colored by AllHR (**b**), TME-HR (**c**) and  
541 epithelial-specific HR genes (**d**). **e**, Kaplan-Meier survival curves indicating relapse-free survival.  
542 Two-sided Wald test. Likelihood Ratio Test p-values (LRT-pv) are specified. **f,g**, UMAP layout of  
543 14674 CRC tumor cells (SMC cohort) colored by patient ID (**f**) and expression of the EpiHR  
544 signature (**g**). **h**, Barplot quantifying the sub-population composition of each patient in the SMC  
545 (left) and KUL (right) datasets. Patient ID is detailed. Patients with low WNT signature scores are  
546 marked with an “\*\*”. **i**, Selected Hallmarks, GOSLIM and KEGG gene signatures enriched in HRCs  
547 compared to the rest of tumor cells in human and mouse CRC samples. **j**, Boxplot representing  
548 the proportion of HRCs in each clinical stage. Box plots have whiskers of maximum 1.5 times the  
549 interquartile range. Boxes represent first, second (median) and third quartiles. n= 3, 7, 14, 3,  
550 patients from left to right. **Two-sided Kruskal-Wallis test**. **k**, UMAP of tumor cells colored by  
551 expression of the LGR5 signature. **l**, UMAP of tumor cells labelled according to their classification  
552 as HRCs, LGR5+, double positive or other cells. **m-o**, Primary tumors were generated in the  
553 caecum of c57BL/6J mice by injecting syngeneic AKTP MTOs. UMAPs depicting GFP+ tumor  
554 cells dissociated from primary tumors colored by expression levels of (**m**) EpiHR signature, (**n**)  
555 Lgr5 signature and (**o**) their classification as HRCs, Lgr5+, double positive or other cells.

556

557 **Fig. 2 | Spatiotemporal dynamics of CRC metastases resolved by scRNAseq**

558 **a**, Schematic representation of the mouse model of CRC metastatic relapse developed herein. **b**,  
559 Percentage of metastatic recurrence depending on time to primary tumor resection. Number of  
560 mice are detailed above the barplot. **P-value for generalized linear model**. **c**, Intravital  
561 bioluminescence imaging (BLI) quantification (photons s<sup>-1</sup>) of a representative experiment. Grey  
562 points and lines represent bioluminescence in the lower thorax of individual mice and purple  
563 points in the liver. Representative images of bioluminescence in the same mouse before, after  
564 surgery and upon liver metastases formation are shown. **d**, Representative images of whole livers  
565 containing GFP-expressing tumor cells obtained using lightsheet microscopy. Scale bars, left  
566 image (300 µm on Maximum Intensity Projections (MIP, and selected single plane insets 50 µm);  
567 right (100 µm on MIP and single plane insets 50 µm). **e**, Illustration of the longitudinal single cell  
568 RNA-expression analysis of tumor cells along the metastatic cascade. **f, g**, UMAP layout of 900  
569 tumor cells isolated from 7 different mice colored by (**f**) metastatic stage and (**g**) Seurat clusters.

570 **h**, Barplot showing Seurat cluster composition by sample stage. **i, m, q**, Vector fields representing  
571 RNA velocity projected on UMAPs of primary tumors (**i**), micro + small metastases (**m**) and  
572 macrometastases (**q**). Colored by the pseudotime estimated for each cell with scVelo. **j, n, r**,  
573 UMAPs with cells separated in primary tumors (**j**), micro+small metastases (**n**) and  
574 macrometastases (**r**) and colored by gene expression of mKi67, Lgr5 and EpiHR gene signatures.  
575 **k, o, s**, Schematics showing distinct hierarchical behavior during the different stages of metastasis  
576 formation. **l, p, t**, Smoothed mKi67, Lgr5 and EpiHR gene signature expression trends fitted with  
577 Generalized Additive Models as a function of pseudotime in primary tumors (**l**), micro+small (**p**)  
578 and large metastases (**t**).

579

580 **Fig. 3 | Emp1 marks cells enriched in invasion fronts and micrometastases.**

581 **a**, UMAP depicting EpiHR and *Emp1* levels. **b**, TOM and E-CADH immunostaining in *Emp1*-  
582 *iCasp9*-tdTomato AKTP MTOs. Scale bar, 50  $\mu$ m. **c-d**, Expression (normalized intensity) of EpiHR  
583 (**c**) and Lgr5 (**d**) signatures in *Emp1*-high and *Emp1*-low cells 4 weeks post-implantation. n=4  
584 mice per condition. ROAST-GSA adjusted p-values. **e-h**, Representative images of *Emp1*-TOM+  
585 and/or Lgr5-GFP+ cells in primary CRCs (**e,h**) and liver metastases (**f,g**). Dashed lines in panels  
586 **e,h** encompass tumor buds and invasion fronts or label the portal vein in **g**. NM: Normal Mucosa;  
587 ML: Muscle Layer. Scale bars, 500  $\mu$ m (e,g, h); 100  $\mu$ m (e, inset); 50  $\mu$ m (f). **i**, Percentage of Lgr5-  
588 GFP<sup>high</sup> and *Emp1*-TOM<sup>high</sup> cells in different CRC regions. Whiskers are maximum and minimum  
589 values; n= 855,330 cells from 18 mice. Two-sided Paired Wilcoxon test. **j**, Examples of liver  
590 metastases of increasing size. Scale bars, 50  $\mu$ m (micro and small), 250  $\mu$ m (medium), 500  $\mu$ m  
591 (macro). **k**, Percentage of *Emp1*-TOM<sup>high</sup> and Lgr5-GFP<sup>high</sup> cells per metastasis size. n= 318276  
592 cells from 137 liver metastases from 17 different mice. LOESS model with a 95% confidence  
593 interval. **l**, EpiHR levels versus driver mutations. Difference of medians (x axis) versus p-value of  
594 Wilcoxon test (y axis) are shown. **m**, Normalized intensity of EpiHR signature expression in CTOs  
595 of different genotypes. n= 6 (WT) and 5 (Kras G12D) CTOs; 2 technical replicates per genotype.  
596 P-value for two-sided T-test. **n**, Association between HRC frequency and TME cell populations in  
597 SMC patients. Pearson correlation coefficients and p-values are shown. **o**, Representative  
598 patterns of TOM,  $\alpha$ -SMA and EPCAM in primary CRCs. Dashed lines delimit the caecum. Scale  
599 bar: 250  $\mu$ m; 125  $\mu$ m (inset). **p**, Percentage of *Emp1*-TOM<sup>high</sup> cells (mean  $\pm$  SD) in the indicated  
600 conditions; n=17 (control), 4 (hypoxia) and 8 (fibroblast co-culture). Two-sided Wilcoxon test. **q-**  
601 **r**, Expression (normalized intensity) of EpiHR or basal-like signatures. n=4 biological replicates.  
602 ROAST-GSA adjusted p-values. **s**, Representative confocal images of AKTP MTOs co-cultured  
603 with colon fibroblasts. Scale bar, 50  $\mu$ m. Boxes in panels c, d, i, m, q and r indicate first, second

604 (median) and third quartiles. Whiskers in panels m,q and r indicate maximum of 1.5 times the  
605 interquartile range.

606

607 **Fig. 4 | Emp1-high cells are the origin of metastatic relapse.**

608 **a**, Emp1-iCaspase9-mediated cell ablation. **b**, Experimental timeline detailing inducible Emp1+  
609 cell ablation and surgery. **c**, Emp1-TOM+ cells in primary tumors after ablation. Lines mark the  
610 caecum borders. Scale bars, 500  $\mu\text{m}$  (C), 250  $\mu\text{m}$  (C'). **d**, Representative flow cytometry plot of  
611 TOM fluorescence in EPCAM+ cells. **e**, Percentage of Emp1-TOM<sup>high</sup> tumor cells (mean  $\pm$  SD) at  
612 the time of surgery. Every dot is a mouse, n=4 in both groups. Two-sided Wilcoxon test. **f**, Primary  
613 tumor area (mean  $\pm$  SD) after resection. Each dot is a mouse, n= 33 (control) and 22 (DIM) mice.  
614 P-value for linear model after boxcox transformation. **g**, Liver metastases (mean  $\pm$  SD) at  
615 experimental endpoints. Each dot is a mouse, n as in panel **f**. **h**, Percentage of mice that relapse  
616 with liver metastases. Two-sided fisher test. **i**, Experimental timeline detailing late ablation of  
617 Emp1+ cells and metastatic growth by BLI monitoring. n=9 mice per each group. **j**, Percentage of  
618 mice that relapse with liver metastases. Two-sided fisher test. **k**, Metastatic growth by BLI  
619 monitoring upon ablation of Emp1 cells 3 days after intrasplenic inoculation of Emp1-iCasp9-Tom  
620 organoids, n= 3 mice per each group. **l**, Number of liver metastases in **k**. Mean  $\pm$  SD. n= 3 mice  
621 per group. **m**, Experimental timeline. **n**, Representative stainings of Lgr5-DTR-EGFP+ cells in  
622 primary CRCs. Dashed lines outline the serosa. Scale bars, 100  $\mu\text{m}$ . **o**, Representative flow  
623 cytometry plot of Lgr5-EGFP fluorescence. **p**, Percentage of Lgr5-GFP<sup>high</sup> tumor cells (mean  $\pm$   
624 SD). n=3 (Cont.) and 5 (DT) mice respectively. P-value for generalized linear model. **q**, Primary  
625 tumor area (mean  $\pm$  SD) measured after resection. n=20 mice in control and 16 in DT. Two-sided  
626 Wilcoxon test. **r**, Liver metastases (mean  $\pm$  SD) at experimental endpoints. Each dot is a mouse,  
627 n as in (**r**). **s**, Percentage of mice that relapse with liver metastases. Two-sided fisher test. **t**, Liver  
628 metastasis growth monitored by BLI after intrasplenic inoculation of MTOs. **u**, Number of liver  
629 metastases (Mean  $\pm$  SD) in (**t**). n=7 mice in control and n=8 in DT treated in (**t,u**). Points and lines  
630 of BLI measurements in panels **i**, **k** and **t**, represent individual mice, trend lines (bold) show a  
631 LOESS model and P-values were calculated with mixed effects linear model. P-values comparing  
632 in panels **g**, **r**, **l** and **u** were calculated using generalized linear model.

633

634 **Fig. 5 | Neoadjuvant immunotherapy prevents metastatic relapse in CRC.**

635 **a-c**, Representative images of T cell distribution (CD3+) in liver micrometastasis (**a,b**) and  
636 macrometastases (**c**) present in the AKTP CRC relapse model. Scale bars, 100  $\mu\text{m}$  (a), 50  $\mu\text{m}$   
637 (b) and 500  $\mu\text{m}$  (c). **d**, Percentage of CD3+ T Cells (referred to total TME cells) versus metastases

638 size. n=12 mice, 133 metastases. Linear model with mouse as fixed effect. **e-f**, Representative  
639 examples of multiplex immunofluorescence of immune (**e**) and stromal (**f**) markers in metastases.  
640 Scale bars, 100  $\mu\text{m}$  (micro and macro), 500  $\mu\text{m}$  (small). **g**, Proportional stacked area graph  
641 showing TME cell types in metastasis of different sizes; n= 132 metastasis of 20 mice. **h**, Heatmap  
642 showing Hallmark GSEA in cell populations described in Fig. 2g. **i**, Representative flow cytometry  
643 contour plot showing PD-L1 expression in tumor cells of micro- and macro-metastases. **j**,  
644 Percentage of PD-L1+ tumor cells by flow cytometry. Whiskers encompass the smallest and  
645 largest value. Boxes represent first, second (median) and third quartiles. n= 3 (primary), 6 (micro),  
646 4 (small and medium), 2 (macro). Wilcoxon t-test. **k**, Experimental timeline for neoadjuvant  
647 immunotherapy treatment. **l-m**, CD3+ (**l**) and GZMB+ (**m**) cell densities in primary CRCs (means  
648  $\pm$  SD); n= 19 (control), 10 (neoadjuvant). Mixed effects linear model. **n**, Primary CRC area (mean  
649  $\pm$  SD) after resection. Each dot is a mouse; n= 18 (control), 10 (treated). P-value for linear model.  
650 **o**, Liver metastases (mean  $\pm$  SD) at experimental endpoints. Each dot is a mouse; n= 17 (control),  
651 9 (treated). P-value for generalized linear model. **p**, Percentage of mice that developed liver  
652 metastases at experimental endpoints; n as in **o**. P-value for generalized linear model. **q**,  
653 Experimental timeline for late immunotherapy. **r**, Liver metastasis growth measured by normalized  
654 BLI. Points and lines represent individual mice, trend lines show a LOESS model. n= 4 (control),  
655 5 (late immunotherapy). Analyzed with a linear model. **s**, Liver metastases (mean  $\pm$  SD) generated  
656 by AKTP primary tumors. Dots are an individual mouse. n= 7 (control), 6 (late immunotherapy).  
657 P-value for generalized linear model. **t**, Proposed model for metastatic dissemination of CRC and  
658 TME co-evolution.

659 **REFERENCES**

660

- 661 1. *AJCC Cancer Staging Manual. AJCC Cancer Staging Manual* (2017) doi:10.1007/978-3-  
662 319-40618-3.
- 663 2. Shimokawa, M. *et al.* Visualization and targeting of LGR5 + human colon cancer stem  
664 cells. *Nature* **545**, 187–192 (2017).
- 665 3. de Sousa e Melo, F. *et al.* A distinct role for Lgr5+ stem cells in primary and metastatic  
666 colon cancer. *Nature* **543**, 676–680 (2017).
- 667 4. Cortina, C. *et al.* A genome editing approach to study cancer stem cells in human tumors.  
668 *EMBO Mol. Med.* **9**, 869–879 (2017).
- 669 5. Calon, A. *et al.* Dependency of Colorectal Cancer on a TGF- $\beta$ -Driven Program in Stromal  
670 Cells for Metastasis Initiation. *Cancer Cell* **22**, 571–584 (2012).
- 671 6. Calon, A. *et al.* Stromal gene expression defines poor-prognosis subtypes in colorectal  
672 cancer. *Nat. Genet.* **47**, 320–329 (2015).
- 673 7. Isella, C. *et al.* Stromal contribution to the colorectal cancer transcriptome. *Nat. Genet.*  
674 **47**, 312–9 (2015).
- 675 8. Lee, H.-O. *et al.* Lineage-dependent gene expression programs influence the immune  
676 landscape of colorectal cancer. *Nat. Genet.* **52**, 594–603 (2020).
- 677 9. Guinney, J. *et al.* The consensus molecular subtypes of colorectal cancer. *Nat. Med.* **21**,  
678 1350–1356 (2015).
- 679 10. Raghavan, S. *et al.* Microenvironment drives cell state, plasticity, and drug response in  
680 pancreatic cancer. *Cell* **184**, 6119-6137.e26 (2021).
- 681 11. Joanito, I. *et al.* Single-cell and bulk transcriptome sequencing identifies two epithelial  
682 tumor cell states and refines the consensus molecular classification of colorectal cancer.  
683 *Nat. Genet.* **54**, 963–975 (2022).
- 684 12. Tauriello, D. V. F. *et al.* TGF $\beta$  drives immune evasion in genetically reconstituted colon  
685 cancer metastasis. *Nature* **554**, 538–543 (2018).
- 686 13. Massagué, J. & Obenauf, A. C. Metastatic colonization by circulating tumour cells. *Nature*  
687 **529**, 298–306 (2016).
- 688 14. Barriga, F. M. *et al.* Mex3a Marks a Slowly Dividing Subpopulation of Lgr5+ Intestinal  
689 Stem Cells. *Cell Stem Cell* **20**, 801-816.e7 (2017).
- 690 15. Lange, M. *et al.* CellRank for directed single-cell fate mapping. *Nat. Methods* **2022** *192*  
691 **19**, 159–170 (2022).
- 692 16. Álvarez-Varela, A. *et al.* Mex3a marks drug-tolerant persister colorectal cancer cells that

- 693 mediate relapse after chemotherapy. *Nat. Cancer* 2022 (2022) doi:10.1038/S43018-022-  
694 00402-0.
- 695 17. Tyler, M. & Tirosh, I. Decoupling epithelial-mesenchymal transitions from stromal profiles  
696 by integrative expression analysis. *Nat. Commun.* **12**, 1–13 (2021).
- 697 18. Grigore, A. D., Jolly, M. K., Jia, D., Farach-Carson, M. C. & Levine, H. Tumor budding:  
698 The name is EMT. partial EMT. *Journal of Clinical Medicine* vol. 5 51 (2016).
- 699 19. Roa-Peña, L. *et al.* Keratin 17 identifies the most lethal molecular subtype of pancreatic  
700 cancer. *Sci. Rep.* **9**, 11239 (2019).
- 701 20. Durgan, J. *et al.* SOS1 and Ras regulate epithelial tight junction formation in the human  
702 airway through EMP1. *EMBO Rep.* **16**, 87–96 (2015).
- 703 21. Bangsow, T. *et al.* The epithelial membrane protein 1 is a novel tight junction protein of  
704 the blood-brain barrier. *J. Cereb. Blood Flow Metab.* **28**, 1249–1260 (2008).
- 705 22. Aceto, N. *et al.* Circulating tumor cell clusters are oligoclonal precursors of breast cancer  
706 metastasis. *Cell* **158**, 1110–1122 (2014).
- 707 23. Barry, E. R. *et al.* Restriction of intestinal stem cell expansion and the regenerative  
708 response by YAP. *Nature* **493**, 106–110 (2013).
- 709 24. Cheung, P. *et al.* Regenerative Reprogramming of the Intestinal Stem Cell State via  
710 Hippo Signaling Suppresses Metastatic Colorectal Cancer. *Cell Stem Cell* **27**, 590-604.e9  
711 (2020).
- 712 25. Vasquez, E. G. *et al.* Dynamic and adaptive cancer stem cell population admixture in  
713 colorectal neoplasia. *Cell Stem Cell* **29**, 1213-1228.e8 (2022).
- 714 26. Han, T. *et al.* Lineage Reversion Drives WNT Independence in Intestinal Cancer. *Cancer*  
715 *Discov.* **10**, 1590–1609 (2020).
- 716 27. Lupu, B. *et al.* Colorectal cancer residual disease at maximal response to EGFR  
717 blockade displays a druggable Paneth cell–like phenotype. *Sci. Transl. Med.* **12**,  
718 :eaax8313 (2020).
- 719 28. Heinz, M. C. *et al.* Liver colonization by colorectal cancer metastases requires YAP-  
720 controlled plasticity at the micrometastatic stage Cellular determinants of metastatic  
721 outgrowth. *Cancer Res.* 1–16 (2022) doi:10.1158/0008-5472.CAN-21-0933.
- 722 29. Solé, L. *et al.* p53 wild-type colorectal cancer cells that express a fetal gene signature are  
723 associated with metastasis and poor prognosis. *Nat. Commun.* **13**, 2866 (2022).
- 724 30. Ohta, Y. *et al.* Cell-matrix interface regulates dormancy in human colon cancer stem  
725 cells. *Nature* **680**, 784–794 (2022).
- 726 31. Mustata, R. C. *et al.* Identification of Lgr5-Independent Spheroid-Generating Progenitors

- 727 of the Mouse Fetal Intestinal Epithelium. *Cell Rep.* **5**, 421–432 (2013).
- 728 32. Wang, Y. *et al.* Comprehensive Molecular Characterization of the Hippo Signaling  
729 Pathway in Cancer. *Cell Rep.* **25**, 1304-1317.e5 (2018).
- 730 33. Yuan, Y. *et al.* YAP1/TAZ-TEAD transcriptional networks maintain skin homeostasis by  
731 regulating cell proliferation and limiting KLF4 activity. *Nat. Commun.* **11**, 1472 (2020).
- 732 34. Morral, C. *et al.* Zonation of Ribosomal DNA Transcription Defines a Stem Cell Hierarchy  
733 in Colorectal Cancer. *Cell Stem Cell* **26**, 845-861.e12 (2020).
- 734 35. Brahmer, J. R. *et al.* Safety and Activity of Anti-PD-L1 Antibody in Patients with  
735 Advanced Cancer. *N. Engl. J. Med.* **366**, 2455–2465 (2012).
- 736 36. Le, D. T. *et al.* PD-1 Blockade in Tumors with Mismatch-Repair Deficiency. *N. Engl. J.*  
737 *Med.* **372**, 2509–2520 (2015).
- 738 37. Topalian, S. L. *et al.* Safety, Activity, and Immune Correlates of Anti-PD-1 Antibody in  
739 Cancer. *N. Engl. J. Med.* **366**, 2443–2454 (2012).
- 740 38. Fumagalli, A. *et al.* Plasticity of Lgr5-Negative Cancer Cells Drives Metastasis in  
741 Colorectal Cancer. *Cell Stem Cell* **26**, 569-578.e7 (2020).
- 742 39. Ganesh, K. *et al.* L1CAM defines the regenerative origin of metastasis-initiating cells in  
743 colorectal cancer. *Nat. cancer* **1**, 28–45 (2020).
- 744 40. van Wyk, H. C. *et al.* The Relationship Between Tumor Budding, Tumor  
745 Microenvironment, and Survival in Patients with Primary Operable Colorectal Cancer.  
746 *Ann. Surg. Oncol.* **26**, 4397–4404 (2019).
- 747 41. Lugli, A. *et al.* Recommendations for reporting tumor budding in colorectal cancer based  
748 on the International Tumor Budding Consensus Conference (ITBCC) 2016. *Mod. Pathol.*  
749 **30**, 1299–1311 (2017).
- 750 42. Padmanaban, V. *et al.* E-cadherin is required for metastasis in multiple models of breast  
751 cancer. *Nat.* 2019 5737774 **573**, 439–444 (2019).
- 752 43. Mlecnik, B. *et al.* The tumor microenvironment and Immunoscore are critical determinants  
753 of dissemination to distant metastasis. *Sci. Transl. Med.* **8**, 327ra26 (2016).
- 754 44. Chalabi, M. *et al.* Neoadjuvant immunotherapy leads to pathological responses in MMR-  
755 proficient and MMR-deficient early-stage colon cancers. *Nat. Med.* **26**, 566–576 (2020).
- 756
- 757
- 758
- 759

## 760 **METHODS**

### 761 **MTOs and integration of cassettes using CRISPR**

762 We previously described<sup>12</sup> the establishment of MTOs from primary tumors arising in GEMMs  
763 with compound genetic alterations (Apc, K-ras, Tp53, Tgfbr2). MTOs were cultured as detailed  
764 by Tauriello et al.<sup>12</sup> and checked bimonthly for mycoplasma contamination. 20 bp small guide  
765 RNAs (sgRNA) were designed to cut 9-11 base pairs after the STOP codons using the  
766 <http://crispr.mit.edu> web tool and were cloned into pX330-IRFP hSp-enhanced-Cas9 plasmid<sup>4</sup>.  
767 The sgRNA sequence for Emp1 was “AAATAAGCCGAATACGCTCA” and for Lgr5  
768 “GTCTCTAGTGACTATGAGAG”. 1kb 5' and 3' homology arms were sequentially cloned into  
769 pShuttle vectors containing the inducible Caspase9-tdTomato cassette<sup>34</sup>, a kind gift from Toshiro  
770 Sato. IRES-DTR-T2A-EGFP-WPRE-BGHpA sequence was cloned between Lgr5 homology arms  
771 flanking the gene stop codon. EGFP was cloned after the IRES sequence to generate the LGR5-  
772 IRES-EGFP-WPRE-BGHpA donor. CRISPR-Cas9 knock-in editing was carried out as described  
773 previously<sup>4</sup>. AKP-MTO#93 Emp1-iCT was generated from a single tdTomato+ cell (clone#14).  
774 MTO#93 Emp1-iCT Lgr5-EGFP was first generated from a single tdTomato+ cell (clone#49), then  
775 nucleofected with the Lgr5-EGFP construct and established from a pool of sorted EGFP+ cells.  
776 MTO#93 Lgr5-iCT was generated by a single tdTomato+ cell (clone#2). MTO#93 Lgr5-DTR-  
777 EGFP was generated by sorting a pool of EGFP+ cells. Triple mutant AKP MTO#54<sup>12</sup> Emp1-iCT  
778 was generated by sorting a pool of tdTomato+ cells. CRISPR-Cas9 gene editing was  
779 subsequently used to introduce a Smad4 mutation in AKP Emp1-iCT to generate AKPS MTOs as  
780 previously described<sup>45</sup>. Correct integration of the knockin cassettes was checked by PCR and  
781 sequencing of the genomic regions. Correct expression of the reporter cassette was tested by  
782 RT-qPCR or by sorting cells from tumors as described in the text. Genotyping primers are detailed  
783 in Supplementary Table 5.

784

### 785 **Generation of CRISPR-derived Tumor Organoids (CTOs)**

786 To study the effect of gene driver mutations on the HRC phenotype, we sequentially introduced  
787 mutations in Apc, Kras, Tp53, Tgfbr2 and/or Smad4 in normal mucosa colonic organoids using  
788 CRISPR-Cas9 as described elsewhere<sup>16,45,46</sup>. Compound mutations were introduced in organoids  
789 derived from one c57BL/6J mouse, which allowed us to assess the impact of individual mutations  
790 on gene expression without other confounding variables. We named these organoids CRISPR-  
791 derived Tumor Organoids (CTOs) to distinguish them from Mouse Tumor Organoids (MTOs), that  
792 were established from GEMMs.



793 **Lentivirus production and MTO infection**

794 For bioluminescent tracking, MTOs were infected with a lentivirus encoding an EGFP-firefly  
795 luciferase fusion reporter construct under the control of the PGK promoter. For YAP inhibition  
796 experiments, AKTP organoids were infected with shControl (SHC002) or shYAP1  
797 (TRCN0000095864, TRCN0000095865, TRCN0000095866, TRCN0000095867) Mission Sigma-  
798 Aldrich lentiviral constructs. We also use a pInducer20 EGFP-TEADi vector, a gift from Ramiro  
799 Iglesias-Bartolome (Addgene plasmid # 140145 ; <http://n2t.net/addgene:140145> ;  
800 RRID:Addgene\_140145), that blocks the activity of both YAP and TAZ<sup>33</sup>.

801 **Animal experimentation approval and maintenance**

802 Experiments with mice were approved by the Animal Care and Use Committee of Barcelona  
803 Science Park under protocol CEEA-PCB-14-000053. Mice were maintained in a specific-  
804 pathogen-free (SPF) facility with a 12-h light–dark cycle, under controlled temperature and  
805 humidity (18-23°C and 40-60% respectively) and given ad libitum access to standard diet and  
806 water. All mice were closely monitored by authors, facility technicians and by an external  
807 veterinary scientist responsible for animal welfare. Authors monitored primary tumor and  
808 metastasis growth using intravital bioluminescence at least once a week.

809 **Inoculation of MTOs into the caecum and rectum**

810 For all injections, c57BL/6J mice were purchased from Janvier Labs at six weeks of age and  
811 injected at 7 to 9 weeks of age. Sex always matched the origin of the tumor. Intra-caecum  
812 injections were used for the generation of primary tumors. Organoids were harvested and  
813 incubated for 30 minutes with cold HBSS to break down BME (Bio-Techne, 3533-010-02), without  
814 disrupting their structure. Cells were then counted and resuspended in 70% BME in HBSS for  
815 injection at a concentration of  $0.1 \times 10^6$  cells in 10  $\mu$ l per mouse. Full organoids were injected with  
816 a 30G syringe into the submucosal wall of the distal caecum while looking through binocular lens.  
817 We introduced a significant modification to previous protocols<sup>47</sup> by moving the injection site to the  
818 apex of the caecum, which allowed posterior surgical resection. For liver colonization studies we  
819 used intrasplenic injections of organoids as described before<sup>12</sup>. Rectal injections were performed  
820 following a previously described procedure<sup>48</sup>. [Maximum tumor volume of 300mm<sup>3</sup> allowed by the](#)  
821 [animal experimentation committee was never exceeded in these experiments except in](#)  
822 [experiments shown in Extended Data Fig 11j, where 1 mouse out of 19 developed larger tumor](#)  
823 [due to very fast tumor growth between the last measurement and the day of sacrifice.](#)

## 824 **Primary tumor resection**

825 Mice were anesthetized with isoflurane and placed in dorsal recumbency. The abdomen was  
826 shaved and sterilized with povidone-iodine surgical solution. A small midline incision - slightly to  
827 the left- was performed to open the skin and peritoneum and expose the abdominal area. We  
828 placed a sterile surgical drape on top of the abdomen with a circular hole above the incision and  
829 sprawled the caecum over the drape using cotton swabs and saline to keep it hydrated. After  
830 confirming the presence of a primary tumor, Kelly forceps were used to first knot the surgical  
831 suture into the caecum wall, in between the ileocecal junction and the primary tumor. This  
832 provided a grip for subsequent caecum ligation. After ligation, the apical caecum containing the  
833 primary tumor was excised and any remaining caecal tissue was trimmed. After resection and  
834 organ fixation, we measured primary tumor size using a caliper. We provide a video of the surgery,  
835 which usually lasted from 5 to 10 minutes (Supplementary video 1). Fitness of mice was monitored  
836 weekly throughout the experiment. Mice were euthanized four weeks after resection and  
837 metastasis were scored macroscopically.

## 838 **Pharmacological treatments**

839 For iCasp9-inducible ablation experiments, animals were treated with dimerizer (AP20187,  
840 Medchem express, HY-13992) via intraperitoneal injection at 2.5 mg/kg 3 times per week (Emp1-  
841 iCasp9) or 5 mg/kg every day (Lgr5-iCasp9). For DTR-inducible ablation mice were treated with  
842 16.7 µg/kg of diphtheria toxin (Sigma-Aldrich, 322326) three times per week. For immunotherapy  
843 experiments, 2 shots of 250 µg of anti-mouse CTLA-4 (C2444, Leinco) and/or anti-mouse PD-1  
844 (P372, Leinco) were administered via intraperitoneal injection 5 days apart.

## 845 **Tumor dissociation for flow cytometry**

846 Primary tumors and micro-dissected liver metastases were chopped with razor blades.  
847 Subsequent enzymatic digestion was performed with 200 U/ml collagenase IV (Sigma Aldrich,  
848 C5138) in HBSS (Lenovo) for 30 min at 37 °C, in a shaking water bath or a gentleMACS  
849 Dissociator (Miltenyi Biotec). Digested tissue fragments were then filtered through 100- and 40-  
850 µm meshes, washed, and treated for 5 minutes with ammonium chloride. Single-cell preparations  
851 were first blocked with anti-CD16/32 (clone 93; eBioscience) and then stained with APC anti-  
852 EPCAM (Biolegend, 118214) and BV605 anti-CD45 (Biolegend, 103155) antibodies at 1:200  
853 concentration. In experiments measuring PD-L1 expression in tumor cells, cells were stained with  
854 FITC anti-EPCAM (Santa Cruz, clone G8.8, 53532) and APC anti-PDL1 (BD, 564715, clone  
855 MIH5) at 1:200 concentration. Finally, cells were resuspended in HBSS with 0.5% FBS and DAPI  
856 (Sigma Aldrich, D9542).

### 857 **Collection of primary CRC and metastasis samples**

858 Metastatic seeding in the CRC relapse models is not synchronized; as it occurs in patients, tumor  
859 cells are shed from the primary tumor continuously during weeks until the day of resection. As a  
860 result, metastases expand for different periods in the liver and lung, and exhibit different sizes at  
861 experimental timepoints depending on when HRCs colonized the organ. We thus decided to  
862 classify according to size instead to time. Four different CRC samples were collected; Primary,  
863 Micrometastasis, Small metastasis and Macrometastases. Micrometastases and small  
864 metastases were collected from liver of mice 29 to 31 days post primary tumor implantations (i.e.  
865 at the time of primary CRC resection). Micrometastases samples were DTCs collected from livers  
866 with absent or residual bioluminescence ex vivo in which metastases were not visible. For small  
867 metastases, metastatic nodules were visible but small in size (<1.5mm). Macrometastases  
868 samples were derived from metastatic nodules larger than 4mm in livers from mice 64 to 66 days  
869 after primary tumor implantation. Primary tumor samples were paired with micro, small or  
870 macrometastases samples and were collected from both timepoints (29 to 31 and 64 to 66 days  
871 post primary tumor implantation).

### 872 **Isolation of liver residual DTCs**

873 For isolation of low numbers of tumor cells from mice without visible metastases, whole livers  
874 were thoroughly minced with razor blades. After an initial 30-minute digestion with 200 U/ml  
875 collagenase IV (Sigma-Aldrich, C5138), samples were filtered through 100 µm meshes. Although  
876 most cells flowed through, a small fraction of the sample –highly enriched for tumor cells– was  
877 retained in the filter (Extended data Fig. 3k,l). Filters were then laid into a 6-well plate and covered  
878 with HBSS containing 200 U/ml collagenase IV, 200 µg/ml Dispase II (Sigma-Aldrich, D4693), 40  
879 µg/ml DNase I (Sigma-Aldrich, 10104159001) and 13 µM rock inhibitor (Medchem Express, HY-  
880 10583). After re-digestion in a water bath for 30 minutes at 37 °C, most cells now seeped through  
881 the filters. The protocol continued with washing, ammonium chloride treatment and antibody  
882 staining as described above. DAPI- EGFP+ CD45- cells were gated to sort tumor cells.

### 883 **Histology and tissue staining**

884 Standard hematoxylin/eosin (HE) and antibody staining were performed on 4-µm tissue sections  
885 using standard procedures, as described previously<sup>12</sup>. [Details can be found in Supplementary](#)  
886 [Table 6](#). The following secondary antibodies were used: donkey anti-goat conjugated to Alexa  
887 488/568/647 (Life Technologies A11055, A11057, A21447), donkey anti-rabbit conjugated to  
888 Alexa 488/568/647 (Life Technologies A21206, A10042, A31573) and donkey anti-mouse  
889 conjugated to Alexa 488/568/647 (Life Technologies A-21202, A10037, A31571) at RT. Digital

890 scanned bright-field and fluorescent images were acquired with a NanoZoomer-2.0 HT C9600  
891 scanner (Hamamatsu, Photonics, France). All images were visualized with the NDP.view 2  
892 U123888-01 software (Hamamatsu, Photonics, France) with a gamma correction set at 1.8 in the  
893 image control panel.

#### 894 **Co-culture of MTOs and colon fibroblasts**

895 To address the role of fibroblasts in inducing HRCs, we seeded 5000 AKTP Emp1-iCT MTO cells  
896 with or without 100k mouse colon fibroblasts in BME (Bio-Techne, 3533-010-02) and  
897 supplemented them with MTO cell culture media<sup>12</sup> without noggin nor galunisertib. Co-cultures  
898 were analyzed 7 days after by flow cytometry and confocal microscopy. For Fig. 3s and Extended  
899 Data Fig. 10e, MTOs and mouse colon fibroblasts were also co-cultured in hanging drops as  
900 previously described<sup>49</sup>.

#### 901 **In Situ Hybridization on CRC patient samples**

902 Paraffin-embedded tissue sections (2-3  $\mu$ m in thickness) of human CRC primary tumors were air  
903 dried and further dried at 60 °C over-night prior any staining. To compare *EMP1* and *LGR5*  
904 expression, sections were hybridized with RNAscope® Probe Hs-LGR5 (ref: 311021, Bio-Techne  
905 R&D Systems) in C1 channel, a custom-made RNAscope® Probe Hs-EMP1 (, Bio-Techne R&D  
906 Systems, 895051-C2) in C2 channel and an Alexa568-conjugated antibody against E-  
907 CADHERIN. To compare the expression of *EMP1* with other HRC-marker genes, sections were  
908 hybridized with RNAscope® Probe Hs-EMP1 mRNA in channel 1 (Bio-Techne R&D Systems,  
909 895051-C1) and stained with the relevant antibodies. FISH probe were detected using the  
910 RNAscope® Multiplex Fluorescent Detection Reagents Kit v2 (Bio-Techne R&D Systems,  
911 323110).

#### 912 **Multiplex immunofluorescence**

913 Multiplex immunofluorescence staining was performed on 4- $\mu$ m-thick formalin-fixed paraffin  
914 embedded sections using the OPAL protocol (Akoya Biosciences, Marlborough, MA) on the Leica  
915 BOND RXm autostainer (Leica Microsystems, Wetzlar, Germany). Six consecutive staining cycles  
916 were performed using the following primary antibody-Opal fluorophore pairings. Stroma panel:  
917 CD34 (1:3000, ab81289; Abcam)–Opal 520; CD146 (1:500, ab75769; Abcam)–Opal 570;  $\alpha$ -SMA  
918 (1:1000, ab5694; Abcam)–Opal 620; PERIOSTIN (1:1000; Abcam, ab227049)–Opal 690; and E-  
919 E-CADHERIN (1:500; Cell Signaling, 3195)–Opal 650. Immune panel: (1) LY6G (1:300; BD  
920 Pharmingen, 551459)–Opal 540; (2) CD4 (1:500; Abcam, ab183685)–Opal 520; (3) CD8 (1:800;  
921 Cell Signaling, 98941)– Opal 570; (4) CD68 (1:1200, Abcam, ab125212)–Opal 620; (5) FOXP3

922 (1:400; Cell Signaling, 126553)–Opal 650; and (6) E-CADHERIN (1:500; Cell Signaling, 3195)–  
923 Opal 690. Primary antibodies were incubated for 60 minutes and detected using the BOND Poly-  
924 mer Refine Detection System (Leica Biosystems, Buffalo Grove, IL, DS9800) according to the  
925 manufacturer’s instructions, substituting DAB for the Opal fluorophores, with a 10 minute  
926 incubation time and without adding hematoxylin. Whole-slide scans and multispectral images  
927 (MSI) were obtained on the Akoya Biosciences Vectra Polaris. Batch analysis of the MSIs from  
928 each case was performed with the inForm 2.4.8 software provided. Finally, batched analyzed  
929 MSIs were fused in HALO (Indica Labs, Albuquerque, NM) to produce a spectrally unmixed  
930 reconstructed whole-tissue image, ready for analysis.

### 931 **Statistical analyses multiplex immunofluorescence**

932 HALO® IMAGE ANALYSIS PLATFORM software was used for quantification of cell phenotypes  
933 within metastases and primary tumors. Two matrices of counts (distinguishing immune and  
934 stromal panels) with the total number of cells per metastasis/primary (in rows) assigned to each  
935 cell population (in columns) were obtained. Multiple positives were present in both immune and  
936 stromal panels. These cases observed in the immune panel only represented the 0.7% of the  
937 total assignments and were removed from the analysis. For the stromal panel,  $\alpha$ -SMA and  
938 POSTN double positives were kept and labeled in a distinct category  $\alpha$ -SMA/POSTN. The rest  
939 of multiple positives, that accumulated the 7% of the total cells, were amalgamated and labeled  
940 as “stromal others”. For all metastases, information regarding metastasis size ( $n^\circ$  of total cells in  
941 log2 scale), metastatic burden (defining micro, small and big metastases) and organ site were  
942 considered for subsequent analysis.

943  
944 For the proportional stacked area graph, only the percentages of CD4, FOXP3, CD8, LY6G and  
945 CD68 for the immune panel, and the percentages of CD146, CD34, POSTN,  $\alpha$ -SMA and  $\alpha$ -  
946 SMA/POSTN for the stromal panel were considered. The cell composition of all measured  
947 metastases (in percentages) was averaged out using the R function aggregate, taking as grouping  
948 elements both metastasis size and metastatic burden. Linear mixed effects models were fitted  
949 independently for every cell population using the CLR-transformed values as response variable,  
950 the metastatic burden and the metastasis size as fixed effects, and the tumor Id (the tumor  
951 identifier) as random effect to consider the dependence between metastases for the same tumor.

### 952 **Quantification of tdTomato and EGFP fluorescence intensity**

953 For the quantification of percentages of Emp1-tdTomato high and Lgr5-EGFP-high in tumor  
954 sections we used HALO® IMAGE ANALYSIS PLATFORM. Briefly, the epithelial tumor area was

955 classified apart from the stroma, background and necrosis using a random forest algorithm. Single  
956 cells were detected and tdTomato/EGFP fluorescence intensity was measured for every cell. In  
957 primary tumors, Tomato-high and EGFP-high tumor cells were defined as the cells in the 90<sup>th</sup>  
958 percentile of each sample. In liver metastases, Tomato-high and EGFP-high tumors cells were  
959 defined as the cells in the 90<sup>th</sup> percentile for all metastases measured. For Emp1-iCT liver  
960 metastases (in Extended Data Fig. 6j) and Lgr5-DTR-EGFP liver metastases (in Extended Data  
961 Fig. 11q), tumor cell fluorescence-intensity was analyzed using ImageJ with a custom-made  
962 macro. Tumor cells were first detected and isolated using E-CADHERIN to create a mask.  
963 TdTomato or EGFP intensity was calculated for every pixel inside the masked area. Then, we  
964 plotted the percentage of fluorescence high and low pixels as a function of the area of the  
965 metastases (measured in pixels).

### 966 **Gene expression analysis by RT-qPCR**

967 RT-qPCR and Microarrays were used to compare subpopulations of Emp1-high and -low, Lgr5-  
968 high and -low cells dissociated from MTO#93 organoids grown *in vitro* or *in vivo*. Subpopulations  
969 were defined in flow cytometry as the top/bottom 10% in fluorescence expression. RNA from 2000  
970 cells was extracted and retrotranscribed to cDNA as described previously<sup>50</sup>. To analyze gene  
971 expression changes RT-qPCR was performed using 5 ng of cDNA per each real-time qPCR well.  
972 Real-time qPCRs were performed with TaqMan Universal PCR Master Mix (Applied Biosystems,  
973 4369016) or PowerUp SYBR Green Master Mix (Applied Biosystems, 100029284) in triplicates,  
974 following manufacturer's instructions. Gene expression levels were normalized using the  
975 housekeeping genes *PPIA* or *B2M*. The following TaqMan assays were used: TdTomato-BGHPA  
976 (custom made probe; F: GGGCATGGCACCGGCAGCACC, R:  
977 CCTACTTGTACAGCTCGTCCATGCC), MmPPIA (Mm002342430\_g1), MmB2m  
978 (Mm00437762\_m1), EGFP (Mr04097229mr), MmEmp1 (Mm00515678\_m1), MmLgr5  
979 (Mm0043889\_m1), MmSmoc2 (Mm00491553\_m1), MmLamC2 (Mm00500494), Ctgf  
980 (Mm01192033\_g1). The following Sybr primers were used: MmYAP (F:  
981 ACCCTCGTTTTGCCATGAAC, R: TGTGCTGGGATTGATATTCCGTA), MmCyr61 (F:  
982 AGGTCTGCGCTAAACAACACTCA, R: ATATTCACAGGGTCTGCCTTCT).

### 983 **Western blotting**

984 Cells were harvested in Cell Recovery Solution (Corning, 354257), pelleted and lysed in RIPA  
985 buffer (Tris-HCl pH 7.4, 150 mM NaCl, 0.5% Sodium deoxycolate, 0.1% SDS, 1 mM EDTA, 10  
986 mM NaF, 1 mM PMSF, 1% Triton X-100) supplemented with protease and phosphatase inhibitors  
987 (Sigma Aldrich). Primary antibodies we incubated overnight at 4°C at the following dilutions:

988 YAP/TAZ (Cell Signalling, CS93622) 1:1000, TAZ (Cell Signalling, 72804), 1:20000 vinculin  
989 (Sigma Aldrich, 9264). Anti-Rabbit IgG HRP (NA934V) and anti-mouse IgG HRP (NXA931V)  
990 secondary antibodies were diluted 1:5000 and incubated for 1h at RT with the PVDF membranes.  
991 Membranes were visualized using Hyper Processor (Amersham Pharmacia Biotech).

992

### 993 **RNA sequencing and analysis**

994 We used RNA sequencing to profile CTOs with different genotypes and to profile the effects of  
995 chemotherapy treatment on MTOs. For the first dataset, 5,000 cells from CTOs with multiple  
996 genotypes (AT, AP, AS, AK, ATP, APS, AKP, AKS, AKPT, AKPS) were seeded in BME (Bio-  
997 Techne, 3533-010-02) and cultured in full stem cell medium<sup>4</sup>. Organoids were harvested 7-10  
998 days after seeding. For chemotherapy experiments, MTO54 organoids were dissociated with  
999 TrypLE express (, Thermo Fisher, 12604039) and single cells were resuspended in BME in 6 well  
1000 plates in complete stem cell medium. Two days later, the media was removed and fresh media  
1001 containing Folfiri (5FU at 50 µg/µl (Sigma-Aldrich, F6627) plus SN38 at 100 nM (MedChem, HY-  
1002 13704)) or control (MTO stem cell media<sup>12</sup>) was added for two days.

1003

1004 RNA was extracted and sequenced as we previously described<sup>16</sup>. RNAseq reads from datasets  
1005 (CTOs or chemotherapy treatment) were aligned with STAR (v2.5.2)<sup>51</sup> with default parameters to  
1006 the *Mus musculus* reference genome built with annotations version  
1007 GENCODE\_mmusculus\_vM25. SAM files were converted to BAM and sorted using Sambamba  
1008 (v0.7.1)<sup>52</sup>. Count matrices were generated using the R (v4.0.5) package Rsubread (v2.4.3)<sup>53</sup> with  
1009 the GENCODE\_mmusculus\_vM25 custom annotation. Data from parental versus metastatic  
1010 MTOs was processed as described in Tauriello et al<sup>12</sup>. Genewise differential expression in the  
1011 chemotherapy dataset between controls and Folfiri treatment was performed using the R package  
1012 DESeq2 (v1.30.1)<sup>54</sup>. Normalized values for plots were obtained via the *rlog* function of the same  
1013 package. Signature scores were defined as the scaled mean of all genes in the signature after  
1014 scaling the expression matrix. Comparison of signature scores between conditions was assessed  
1015 using a t-test.

### 1016 **Microarray expression analyses**

1017 Microarrays GeneChip Mapping 250K Nsp Assay Kit, Affymetrix) were used to compare Emp1-  
1018 high and Emp1-low cells from MTO#93 Emp1-iCT primary tumors grown for 4 weeks; and to  
1019 compare MTO#93 Emp1-iCT MTOs grown in vitro alone or in combination with mouse colon  
1020 fibroblasts for 7 days. Samples were processed with oligo v1.46.0<sup>55</sup> (fitProbeLevelModel:

1021 background = TRUE, normalize = TRUE, target = "core", method = "plm"). Raw cel files were  
1022 normalized with RMA method<sup>56</sup> (default parameters). Probesets were annotated with  
1023 Clariom\_S\_Mouse\_HT-na36-mm10-transcript Affymetrix databases. Standard quality controls  
1024 were considered to identify abnormal samples<sup>57</sup>. No samples were excluded due to quality issues.

1025  
1026 Differential expression analysis of Emp1-high vs -low data was performed using a linear model  
1027 with empirical shrinkage (limma R package)<sup>58</sup>, taking into account the paired data setting.  
1028 Differential expression analysis of co-culture data was performed using the same regression  
1029 method, but considering as adjustment variable the Eklund metric pm.iqr<sup>59</sup> to reduce the influence  
1030 of technical variation. Benjamini- Hochberg FDR was used for multiple comparisons correction.  
1031 Gene set analysis was used to explore the enrichment in custom gene sets. The limma's rotation-  
1032 based approach for enrichment<sup>60</sup> was considered to represent the null distribution. The maxmean  
1033 enrichment statistic proposed in<sup>61</sup>, under restandardization, was used for competitive testing.  
1034 Gene signatures (Supplementary Table 7) z-scores<sup>62</sup> were used to measure pathway activity. For  
1035 doing so, normalized expression was adjusted for biological replicate, centered and scaled gene-  
1036 wise according to the mean and the standard deviation computed across samples. Gene  
1037 signature z-score was summarized by taking the average of its constituent genes. In addition, a  
1038 global signature was computed using all genes and used for a priori centering of signature scores.  
1039 This strategy has been proved to be useful to avoid systematic biases. Only the expression of the  
1040 most variable probe sets per gene were considered for gene set analyses.

#### 1041 **10X mouse single cell RNA sequencing analysis**

1042 CellRanger<sup>63</sup> (v4.0.0) was used to align reads to a custom refdata-gex-mm10-2020-A  
1043 transcriptome including the EGFP and Luciferase genes. Gene expression was analysed with  
1044 Seurat (v4.0.3)<sup>64-67</sup>. A total of 1,330 cells having <20% mitochondrial content and >3,000 detected  
1045 genes were considered. Ribosomal reads (17% of the total) were removed. Mitochondrial content  
1046 was regressed out during SCT normalization<sup>68</sup>.

1047  
1048 SCT transformed counts were smoothed with MAGIC (v.2.0.3)<sup>69</sup>. Gene signature expression was  
1049 summarized by taking the average MAGIC score of its constituent genes. HRCs and Lgr5+ cell  
1050 populations were defined by having a score above the 75th percentile. FindAllMarkers was used  
1051 to identify differentially expressed genes from raw counts. The HRCs cell population was  
1052 compared to the rest in order to identify mice HRC markers. Testing was limited to genes detected  
1053 in >10% of cells and showing >0.25 log-fold difference. Functional enrichment analysis was



1054 performed using the GSEApreranked<sup>70</sup> method ranking genes by the log<sub>2</sub> average fold change.  
1055 The significance threshold was set at 5% Benjamini-Hochberg FDR.

1056

1057 To select for marker genes to track HRCs in mouse tumors, we computed the correlation scores  
1058 for all genes with the EpiHR signature in the SMC human dataset and the mouse 10X dataset.  
1059 We used MAGIC score for genes and signature scores as defined previously.

#### 1060 **Mouse SMART-seq\_v2 single cell RNA sequencing analysis**

1061 Smart-seq2 reads were aligned to the UCSC\_GRCm38.mm10 genome with zUMIs<sup>71</sup> and  
1062 analyzed with Seurat<sup>64-67</sup> (v4.0.3). Four technical batches of AKTP at different stages were  
1063 merged into a single object and two technical batches of AKP micrometastases were merged into  
1064 another object. A total of 1,057 cells having <20% mitochondrial content and >20,000 UMIs were  
1065 considered for AKTP, whereas 414 cells with <20% mitochondrial content and >100,000 UMIs  
1066 were isolated from AKP micrometastases. Ribosomal reads were removed. Mitochondrial content  
1067 was regressed out during SCT normalization. SCT transformed counts were further imputed and  
1068 smoothed with MAGIC (v.2.0.3)<sup>69</sup>. Gene signature expression (Supplementary Table 7) was  
1069 summarized by taking the average MAGIC score of its constituent genes. Non-epithelial cells  
1070 were removed and normalized again. In order to improve the integration of the four AKTP batches,  
1071 the IntegrateData function was used with pre-computed anchors based on 3,000 features. The  
1072 integrated dataset was SCT normalized, smoothed with MAGIC (v.2.0.3)<sup>69</sup>, and clustered with  
1073 FindClusters Seurat function (resolution = 1.2). FindMarkers was used to identify differentially  
1074 expressed genes from raw counts. CellRank<sup>15</sup> were used to uncover the cell-state dynamics of  
1075 CRC metastasis from RNA velocity estimates<sup>72,73</sup>. Gene expression or signature expression was  
1076 represented as a function of latent time with R<sup>74</sup>. Additionally, the integration, normalization,  
1077 imputation, and trajectory analysis were performed independently for the subset of cells harvested  
1078 from primary tumors, incipient metastasis, and macrometastases.

#### 1079 **Creation of CRC transcriptomic Meta-cohort**

1080 Public CRC transcriptomic datasets were downloaded from GEO<sup>75</sup> and NCI GDC commons<sup>76</sup>,  
1081 pre-processed and homogenized into a unique Meta-cohort including 1830 samples from:  
1082 TCGA<sup>77</sup>, GSE38832<sup>78</sup>, GSE44076<sup>79</sup>, GSE33113<sup>80</sup>, GSE14333<sup>81</sup>, GSE39582<sup>82</sup> and GSE37892<sup>83</sup>  
1083 (Supplementary Table 1). The last four datasets include disease-free survival information with a  
1084 median follow-up of 3.7 years and clinical information across all datasets is gender, age, stage  
1085 and location of primary tumor (Supplementary Table 1). When not available, MSI status was  
1086 imputed using the transcriptomic signature reported in<sup>84</sup> through density-based non-parametric

1087 clustering<sup>85,86</sup>. Signature scores were computed as the scaled mean of the genes in the signature  
1088 after scaling the expression matrix.

1089  
1090 Microarray data were processed separately using RMA<sup>57</sup>. Information about sample processing  
1091 and hybridization was retrieved from the CEL files. For TCGA, the Legacy version was used for  
1092 expression with clinical annotation from October 2016. Genes were annotated using Ensembl  
1093 Biomart database (GRCh37)<sup>87,88</sup>. Duplicated samples across platforms were removed from the  
1094 GA dataset, as well as samples from other locations than colon or rectum. RSEM<sup>89</sup> expressions  
1095 were already log2-transformed and quantile normalized. Samples TCGA-A6-2679-01A and  
1096 TCGA-AA-A004-01A were excluded due to an anomalous expression distribution among all  
1097 samples.

1098  
1099 Each microarray series was corrected by Eklund metrics<sup>59</sup>, center and scanning date using a  
1100 mixed-effect linear model<sup>90</sup>. Age, gender, stage, site and MSI were also included in these models.  
1101 TCGA sets were corrected for occurrences of combinations of center and plate identifier (random  
1102 effect). For microarrays, probesets were summarized at the gene-level using the first principal  
1103 component from probesets in that gene. This component was then centered and scaled to the  
1104 weighted mean of the means and standard deviations of the probesets. The sign of the component  
1105 was changed to the sign of the probeset contributing the most. All datasets were merged after  
1106 genewise standardization to the GSE39582 series according to the distribution of gender, age,  
1107 MSI and stage using undersampling: a sub-sample of the same number of patients and the same  
1108 distribution according to these clinical variables was selected from the GSE39582 series for each  
1109 dataset. Expression values were truncated to the maximum and minimum values observed in the  
1110 reference dataset.

### 1111 **Gene screening for association with relapse**

1112 Each gene in the Meta-cohort was evaluated for linear association of its expression with  
1113 recurrence using a frailty Cox proportional hazards model<sup>91,92</sup>, including dataset and technical  
1114 variables. Statistical significance was assessed by means of a Wald test. Hazard Ratios (HR) and  
1115 their corresponding 95% confidence intervals were computed as a measure of association. The  
1116 2530 genes with HR>1 and p<0.05 were included in the all\_HR signature.

1117  
1118 We used the GSE39397 dataset<sup>6</sup> which includes expression profiles of epithelial cancer cells  
1119 (EPCAM+), CAFs (FAP+), leukocytes (CD45+) and endothelial cells (CD31+) isolated by FACs

1120 from dissociated primary CRCs (n=14), to classify genes according to their expressions in these  
1121 populations. The EpiHR signature contains genes from the allHR signature which are upregulated  
1122 (Fold change >1; p<0,05) in EPCAM+ cells compared to the three TME populations (FAP+,  
1123 CD31+ and CD45+). AllHR genes that did not pass this cut-off comprised the TME-HR signature.

1124  
1125 Signature scores were computed as the scaled mean of the genes in the signature after scaling  
1126 the expression matrix. The association with recurrence of the EpiHR signature in the whole  
1127 dataset as well as the subclasses of CMS samples was assessed as described above. The  
1128 likelihood ratio test comparing EpiHR and AllHR p-value was computed with the *drop1* R function.  
1129 Kaplan Meier plots were generated using the *survfit* and *plot* functions.

1130  
1131 Association between clinical variables and the EpiHR signature in the CRC metacohort was  
1132 assessed by fitting a linear model for each variable of interest independently. Technical factors  
1133 (dataset and center, as described in extended methods) were included as covariates.

#### 1134 **Association between oncogenic alterations and the EpiHR score**

1135 Annotations of oncogenic alterations for the TCGA samples were downloaded from<sup>93</sup>. A Wilcoxon  
1136 test comparing the expression of mutated vs wild-type samples was performed independently for  
1137 every alteration. The difference of expression medians was used as a measure of the impact of  
1138 each mutation in the gene expression.

#### 1139 **Patient 10X single-cell analysis**

1140 Count matrices were downloaded from arrayExpress (E-MTAB-8107 for samples EXT001,  
1141 EXT002, EXT003, EXT009, EXT010, EXT011, EXT012, EXT013, EXT014, EXT018, EXT019,  
1142 EXT020, EXT021, EXT022, EXT023, EXT024, EXT025, EXT026, EXT027, EXT028) and GEO  
1143 (GSE132465 for all SMC...-T samples)<sup>8</sup>. The remaining EXT samples were processed as referred  
1144 in E-MTAB-8107 and deposited in ArrayExpress under accession number E-MTAB-9934. Cells  
1145 with mitochondrial content higher than 20%, less than 1000 counts, more than 6000 or less than  
1146 200 genes were discarded. Ribosomal genes were also removed from the matrix to avoid  
1147 technical biases during normalization. Samples with less than 500 cells and not classified as core  
1148 tumor were discarded from further analyses. The Korea (SMC samples) and Leuven (EXT  
1149 samples) cohorts were processed independently following the R package Seurat V3  
1150 recommendations<sup>67</sup>: samples were combined and normalized using the SCTtransform function  
1151 regressing mitochondrial percentage, with the method "glmGamPoi", min.cells=1 and  
1152 return.only.genes=FALSE in order to keep the maximum number of genes. Dimensionality

1153 reduction and visualization were performed using RunPCA and RunUMAP, with 26 principal  
1154 components. Expression was imputed and smoothed using the MAGIC algorithm<sup>69</sup>. The  
1155 expression of the EPCAM gene was used to define the connected components corresponding to  
1156 epithelial cells.

1157  
1158 The epithelial component of each cohort was processed as follows: cells with less than 1000/3000  
1159 (SMC/KUL) counts and less than 200/1250 genes detected were removed from the dataset. No  
1160 further normalization was applied. RunPCA, RunUMAP, FindNeighbors and FindClusters were  
1161 applied, with 5/7 principal components and resolution of 0.7. Expression was imputed and  
1162 smoothed using the MAGIC algorithm. Signature scores were computed as the mean value of  
1163 the MAGIC expression per cell for all genes in the signature. The EpiHR and Lgr5 cell populations  
1164 were defined as cells with the corresponding signature expression above the 75 percentile.  
1165 Population markers were found using *FindMarkers*. Functional enrichment was computed through  
1166 the Gene Set Enrichment Analysis implementation in<sup>94</sup> with genes ordered by fold change.  
1167 Samples in the SMC and KUL datasets were annotated according to their iCMS class<sup>11</sup>.

1168  
1169 To identify the core gene expression program upregulated in HRCs, we computed the correlation  
1170 scores for all genes with the EpiHR signature in the SMC and KUL human dataset. The resulting  
1171 list was ranked by the average correlation across all samples (Supplementary Table 2). The  
1172 coreHRC signature was defined as the top 100 genes in the SMC dataset.

1173  
1174 **Association of HRCs and tumor microenvironment populations**  
1175 We classified clusters according to the expression of known markers of microenvironment  
1176 components<sup>8</sup>. For each population we estimated the association between its percentage per  
1177 sample and the percentage of HRCs. Spearman correlation coefficient and p-value were used to  
1178 assess said association.

1179  
1180 **Clustering of EpiHR genes according to expression correlation**  
1181 We computed the Pearson correlation coefficient for all pairwise combinations of genes in the  
1182 EpiHR signature. We then applied hierarchical clustering (*hclust* in R with method “complete”) and  
1183 defined 6 clusters via the *cutree* function. Upon visual inspection we decided to merge the three  
1184 clusters with higher correlation, resulting in Cluster 1 (Extended Data Fig. 1h).

1185  
1186

1187 **Ethics oversight**

1188 Samples of primary CRC from patients used for IF and ISH analysis were obtained from the  
1189 Hospital Clinic de Barcelona-IDIBAPS Biobank (B.0000575), which is integrated in the Spanish  
1190 National Biobanks Network. Samples were donated by patients under informed consent and they  
1191 were processed following standard operating procedures with the appropriate approval of the  
1192 Ethics and Scientific Committee of the Hospital Clinic de Barcelona (register code:  
1193 HCB/2020/1478) and according to the guidelines of the European Network of Research Ethics  
1194 Committees, following European, national and local laws.

1195

1196 **Statistics**

1197 No statistical test was used to determined sample size upfront. Instead sample size was  
1198 determined empirically according to previous knowledge of the variation in the experimental setup  
1199 <sup>4,12,34</sup>. A minimum of four mice were quantified in each experiment and each condition. For the  
1200 majority of in vitro experiments, we used  $n \geq 3$  according to previous experience with similar  
1201 experiments. Additional information is detailed in the reporting summary. Automated blind  
1202 quantifications and blind data analysis were done whenever possible. The sample size typically  
1203 results in standard error <25% of the mean. No data from in vitro or in vivo experiments were  
1204 excluded, except for the CRC relapse model, where a small fraction of mice, typically 1 in every  
1205 10 in each experiment, were not included in the follow up due to invasion into the ileocaecal  
1206 junction, which impeded successful surgery. Occasionally, mice bearing CRCs were sacrificed 1-  
1207 2 days after surgery due to significant weight loss or unhealthy aspect, according to protocols  
1208 approved by the animal experimental committees. Data distributions were assumed to be normal  
1209 but this was not formally tested. Transformations were applied whenever needed. For percentage  
1210 data, normality was assumed for values far from 0 or 100. Statistical analyses were performed  
1211 using R software package (v.4.0.5) and GraphPad Prism (v.7.03)

1212

1213 **Reporting summary**

1214 Further information on research design is available in the Nature Research Reporting Summary  
1215 linked to this article.

1216

1217

1218 **ADDITIONAL REFERENCES**

1219

- 1220 45. Matano, M. *et al.* Modeling colorectal cancer using CRISPR-Cas9-mediated engineering  
1221 of human intestinal organoids. *Nat. Med.* **21**, 256–62 (2015).
- 1222 46. Drost, J. *et al.* Sequential cancer mutations in cultured human intestinal stem cells.  
1223 *Nature* **521**, 43–47 (2015).
- 1224 47. Céspedes, M. V. *et al.* Orthotopic microinjection of human colon cancer cells in nude  
1225 mice induces tumor foci in all clinically relevant metastatic sites. *Am. J. Pathol.* **170**,  
1226 1077–1085 (2007).
- 1227 48. Chen, Y. C. *et al.* Gut Fecal Microbiota Transplant in a Mouse Model of Orthotopic Rectal  
1228 Cancer. *Front. Oncol.* **10**, 1–12 (2020).
- 1229 49. Conti, S. *et al.* CAFs and cancer cells co-migration in 3D spheroid invasion assay. in  
1230 *Methods in Molecular Biology* vol. 2179 243–256 (2020).
- 1231 50. Gonzalez-Roca, E. *et al.* Accurate expression profiling of very small cell populations.  
1232 *PLoS One* **5**, e14418 (2010).
- 1233 51. Dobin, A. *et al.* STAR: Ultrafast universal RNA-seq aligner. *Bioinformatics* **29**, 15–21  
1234 (2013).
- 1235 52. Tarasov, A., Vilella, A. J., Cuppen, E., Nijman, I. J. & Prins, P. Sambamba: Fast  
1236 processing of NGS alignment formats. *Bioinformatics* **31**, 2032–2034 (2015).
- 1237 53. Liao, Y., Smyth, G. K. & Shi, W. The R package Rsubread is easier, faster, cheaper and  
1238 better for alignment and quantification of RNA sequencing reads. *Nucleic Acids Res.* **47**,  
1239 e47–e47 (2019).
- 1240 54. Love, M. I., Huber, W. & Anders, S. Moderated estimation of fold change and dispersion  
1241 for RNA-seq data with DESeq2. *Genome Biol.* **15**, 550 (2014).
- 1242 55. Carvalho, B. S. & Irizarry, R. A. A framework for oligonucleotide microarray  
1243 preprocessing. *Bioinformatics* **26**, 2363–2367 (2010).
- 1244 56. Bolstad, B. M. *et al.* Quality Assessment of Affymetrix GeneChip Data BT - Bioinformatics  
1245 and Computational Biology Solutions Using R and Bioconductor. in *Bioinformatics and*  
1246 *Computational Biology Solutions Using R and Bioconductor* 33–47 (2005).
- 1247 57. Irizarry, R. A. *et al.* Exploration, normalization, and summaries of high density  
1248 oligonucleotide array probe level data. in *Selected Works of Terry Speed* 601–616  
1249 (2012). doi:10.1007/978-1-4614-1347-9\_15.
- 1250 58. Ritchie, M. E. *et al.* Limma powers differential expression analyses for RNA-sequencing

- 1251 and microarray studies. *Nucleic Acids Res.* **43**, e47 (2015).
- 1252 59. Eklund, A. C. & Szallasi, Z. Correction of technical bias in clinical microarray data  
1253 improves concordance with known biological information. *Genome Biol.* **9**, R26 (2008).
- 1254 60. Wu, D. *et al.* ROAST: rotation gene set tests for complex microarray experiments.  
1255 *Bioinformatics* **26**, 2176–82 (2010).
- 1256 61. Efron, B. & Tibshirani, R. On testing the significance of sets of genes. *Ann. Appl. Stat.* **1**,  
1257 107–129 (2007).
- 1258 62. Lee, E., Chuang, H. Y., Kim, J. W., Ideker, T. & Lee, D. Inferring pathway activity toward  
1259 precise disease classification. *PLoS Comput. Biol.* **4**, e1000217 (2008).
- 1260 63. Zheng, G. X. Y. *et al.* Massively parallel digital transcriptional profiling of single cells. *Nat.*  
1261 *Commun.* **8**, 14049 (2017).
- 1262 64. Hao, Y. *et al.* Integrated analysis of multimodal single-cell data. *Cell* **184**, 3573-3587.e29  
1263 (2021).
- 1264 65. Satija, R., Farrell, J. A., Gennert, D., Schier, A. F. & Regev, A. Spatial reconstruction of  
1265 single-cell gene expression data. *Nat. Biotechnol.* **33**, 495–502 (2015).
- 1266 66. Butler, A., Hoffman, P., Smibert, P., Papalexi, E. & Satija, R. Integrating single-cell  
1267 transcriptomic data across different conditions, technologies, and species. *Nat.*  
1268 *Biotechnol.* **36**, 411–420 (2018).
- 1269 67. Stuart, T. *et al.* Comprehensive Integration of Single-Cell Data. *Cell* **177**, 1888-1902.e21  
1270 (2019).
- 1271 68. Hafemeister, C. & Satija, R. Normalization and variance stabilization of single-cell RNA-  
1272 seq data using regularized negative binomial regression. *Genome Biol.* **20**, 296 (2019).
- 1273 69. van Dijk, D. *et al.* Recovering Gene Interactions from Single-Cell Data Using Data  
1274 Diffusion. *Cell* **174**, 716-729.e27 (2018).
- 1275 70. Subramanian, A. *et al.* Gene set enrichment analysis: a knowledge-based approach for  
1276 interpreting genome-wide expression profiles. *Proc Natl Acad Sci U S A* **102**, 15545–  
1277 15550 (2005).
- 1278 71. Parekh, S., Ziegenhain, C., Vieth, B., Enard, W. & Hellmann, I. zUMIs - A fast and flexible  
1279 pipeline to process RNA sequencing data with UMIs. *GigaScience* vol. 7 (2018).
- 1280 72. La Manno, G. *et al.* RNA velocity of single cells. *Nature* **560**, 494–498 (2018).
- 1281 73. Bergen, V., Lange, M., Peidli, S., Wolf, F. A. & Theis, F. J. Generalizing RNA velocity to  
1282 transient cell states through dynamical modeling. *Nat. Biotechnol.* **38**, 1408–1414 (2020).
- 1283 74. R Core Team. R: A Language and Environment for Statistical Computing. (2020).
- 1284 75. Barrett, T. & Edgar, R. [19] Gene Expression Omnibus: Microarray Data Storage,

- 1285 Submission, Retrieval, and Analysis. *Methods in Enzymology* vol. 411 352–369 (2006).
- 1286 76. Grossman, R. L. *et al.* Toward a Shared Vision for Cancer Genomic Data. *N. Engl. J.*  
1287 *Med.* **375**, 1109–1112 (2016).
- 1288 77. Muzny, D. M. *et al.* Comprehensive molecular characterization of human colon and rectal  
1289 cancer. *Nature* **487**, 330–337 (2012).
- 1290 78. Tripathi, M. K. *et al.* Nuclear factor of activated T-cell activity is associated with metastatic  
1291 capacity in colon cancer. *Cancer Res.* **74**, 6947–6957 (2014).
- 1292 79. Sanz-Pamplona, R. *et al.* Aberrant gene expression in mucosa adjacent to tumor reveals  
1293 a molecular crosstalk in colon cancer. *Mol. Cancer* **13**, 46 (2014).
- 1294 80. Kemper, K. *et al.* Mutations in the Ras-Raf axis underlie the prognostic value of CD133 in  
1295 colorectal cancer. *Clin. Cancer Res.* **18**, 3132–3141 (2012).
- 1296 81. Jorissen, R. N. *et al.* Metastasis-Associated Gene Expression Changes Predict Poor  
1297 Outcomes in Patients with Dukes Stage B and C Colorectal Cancer. *Clin. Cancer Res.*  
1298 **15**, 7642–7651 (2009).
- 1299 82. Marisa, L. *et al.* Gene Expression Classification of Colon Cancer into Molecular  
1300 Subtypes: Characterization, Validation, and Prognostic Value. *PLoS Med.* **10**, e1001453  
1301 (2013).
- 1302 83. Laibe, S. *et al.* A seven-gene signature aggregates a subgroup of stage II colon cancers  
1303 with stage III. *Omi. A J. Integr. Biol.* **16**, 560–565 (2012).
- 1304 84. Jorissen, R. N. *et al.* DNA copy-number alterations underlie gene expression differences  
1305 between microsatellite stable and unstable colorectal cancers. *Clin. Cancer Res.* **14**,  
1306 8061–9 (2008).
- 1307 85. Azzalini, A. & Menardi, G. Clustering via nonparametric density estimation: The R  
1308 package pdfcluster. *J. Stat. Softw.* **57**, 1–26 (2014).
- 1309 86. Azzalini, A. & Torelli, N. Clustering via nonparametric density estimation. *Stat. Comput.*  
1310 **17**, 71–80 (2007).
- 1311 87. Smedley, D. *et al.* The BioMart community portal: An innovative alternative to large,  
1312 centralized data repositories. *Nucleic Acids Res.* **43**, W589–W598 (2015).
- 1313 88. Drost, H. G. & Paszkowski, J. Biomart: Genomic data retrieval with R. *Bioinformatics* **33**,  
1314 1216–1217 (2017).
- 1315 89. Li, B. & Dewey, C. N. RSEM: Accurate transcript quantification from RNA-Seq data with  
1316 or without a reference genome. *BMC Bioinformatics* **12**, 323 (2011).
- 1317 90. Bates, D., Mächler, M., Bolker, B. M. & Walker, S. C. Fitting linear mixed-effects models  
1318 using lme4. *J. Stat. Softw.* **67**, 1–48 (2015).



- 1319 91. Therneau, T. M., Grambsch, P. M. & Pankratz, V. S. Penalized survival models and  
1320 frailty. *J. Comput. Graph. Stat.* **12**, 156–175 (2003).
- 1321 92. Therneau, T. *coxme: mixed effects Cox models. R package version 2.2-3. www.cran.R-*  
1322 *project.org/package=coxme. Oikos* (2012).
- 1323 93. Sanchez-Vega, F. *et al.* Oncogenic Signaling Pathways in The Cancer Genome Atlas.  
1324 *Cell* **173**, 321-337.e10 (2018).
- 1325 94. Mootha, V. K. *et al.* PGC-1 $\alpha$ -responsive genes involved in oxidative phosphorylation are  
1326 coordinately downregulated in human diabetes. *Nat. Genet.* **34**, 267–273 (2003).
- 1327

1328 **EXTENDED DATA FIGURE LEGENDS.**

1329

1330 **Extended Data Fig. 1 | The EpiHR geneset marks a defined tumor cell population across**  
1331 **CRCs.**

1332 **a-c**, UMAP layout of whole tumors (stroma + epithelium cells) from 7 CRC patients in the KUL  
1333 dataset. Colored by **(a)** gene expression of all high hazard ratio genes (AllHR), **(b)** tumor  
1334 microenvironment-specific HR genes (TME-HR), and **(c)** epithelial-specific HR genes (EpiHR). **d**,  
1335 Association between clinical variables and the EpiHR signature in the CRC meta cohort was  
1336 assessed by fitting a linear model for each variable independently. Technical factors (dataset and  
1337 center, as described in extended methods) were included as covariates. [Lines show the left and](#)  
1338 [right confidence intervals. n= 1688 patients.](#) **e**. Kaplan-Meier survival curves indicating relapse-  
1339 free survival according to EpiHR gene signature expression for CRC patients classified by CMS.  
1340 Two-sided Wald test. **f-g**, UMAP layout of 2718 CRC tumor cells from the KUL cohort colored by  
1341 **f)** patient ID and **g)** expression of the EpiHR signature. **h**, Heatmap showing Pearson correlation  
1342 scores in gene expression among EpiHR signature genes in patients from the SMC cohort. Note  
1343 that most genes belong to one coherent subset (Cluster 1). Gene lists are detailed in  
1344 Supplementary Table 2. **i**, UMAP layout of human CRC tumor cells colored by the expression of  
1345 genes belonging to Clusters 1, 2, 3 and 4 identified in **(h)**.

1346

1347 **Extended Data Fig. 2 | Characterization of HRC features.**

1348 **a**, Heatmap showing scaled expression of the top 50 most correlated genes with the EpiHR  
1349 signature across SMC patients. Tumor cells are divided as non-HRCs (left, FALSE) and HRCs  
1350 (right, TRUE). The EpiHR signature score for each individual cell is plotted above the heatmap.  
1351 **b**, UMAP layout of CRC tumor cells colored by the expression of the coreHRC signature. The  
1352 coreHRC signature is defined as the top 100 genes with better correlation with the EpiHR  
1353 signature. **c-d**, Heatmap showing Normalized Enrichment Scores (NES) for Genesets in Gene  
1354 Ontology Biological Processes (GOBP) in HRCs from different patients in the KUL **(c)** and SMC  
1355 **(d)** cohorts. Only GOBP genesets with NES scores above 0.5 are shown. Genesets and patients  
1356 are ordered by hierarchical clustering. **e**, UMAP layout of human CRC tumor cells in the SMC  
1357 cohort painted with the Basal cell state signature in Pancreatic Ductal Adenocarcinoma (PDAC)  
1358 by Raghavan et al<sup>10</sup>. **f**, UMAP layout of tumor cells from the KUL cohort showing the expression  
1359 of the Lgr5 signature. **g**, UMAP of same tumor cells labelled according to their classification into  
1360 HRCs, Lgr5+, double positive or other cells. **h-j**, UMAP layout of same tumor cells showing gene

1361 expression levels of canonical intestinal stem cell genes *LGR5*, *OLFM4* and *ASCL2*. **k-o**, UMAPs  
1362 of tumor cells in the SMC dataset showing gene expression levels of canonical intestinal stem  
1363 cell genes *LGR5*, *ASCL2*, *AXIN2*, *OLFM4*, and *SMOC2*. **p,q**, Violin plots showing WNT-ON  
1364 signature expression levels in epithelial tumor cells from patients in the SMC (**p**) and KUL (**q**)  
1365 cohorts. **r**, Barplot quantifying the HRC composition of each patient (combined SMC and KUL  
1366 datasets). Patients are classified as iCMS2 or iCMS3 according to Joanito et al<sup>11</sup>. **Two-sided**  
1367 **Kruskal-Wallis test**. **s,t**, UMAPs of mouse CRC AKTP tumor cells colored according to (**s**) the  
1368 coreHRC signature and (**t**) the Basal cell state signature in Pancreatic cancer by Raghavan et  
1369 al.<sup>10</sup> **u**, Gene expression levels of EpiHR (left) and coreHRC (right) signatures in MTOs derived  
1370 from primary tumors or from liver metastases. **Boxes represent the first, second (median) and**  
1371 **third quartiles. Whiskers indicate maximum and minimum values. Welch two-sided t-test. n= 5**  
1372 **(primary) 10 (metastatic).**

1373

1374 **Extended Data Fig. 3 | Analysis of the CRC relapse mouse models and purification of DTCs.**

1375 **a**, Representative micrograph of hematoxylin- and eosin (HE)-stained adenocarcinoma with  
1376 subserosal invasion (T4) generated by injection of an AKTP MTO in the mouse caecum. Tumor  
1377 center (TC), invasive fronts (IF), muscle layer (ML) and normal mucosa (NM) are indicated. Scale  
1378 bar, 2.5 mm. **b**, Representative image of a different T4 tumor penetrating the muscle layer (ML)  
1379 and reaching the serosa layer. TB: Tumor buds. Scale bar, 1mm. **c**, Picture of a caecum 21 days  
1380 after injection and imaged at the time of surgery showing a primary tumor (arrow) in the distal  
1381 part. **d-e**, Haematoxilin-Eosin (HE) staining of micrometastases and large metastases observed  
1382 in the liver of orthotopic isografted mouse. Scale bars, 50  $\mu$ m and 1 mm, respectively. In **e**, tumoral  
1383 tissue is surrounded by dashed lines. **f-h**, HE staining of lung, lymph node and diaphragm  
1384 metastases from orthotopic isografted mice. Scale bars, 100  $\mu$ m (**f** and **h**) 1 mm (**g**). **i**, Graph  
1385 showing liver longitudinal BLI measurements (photons per second), normalized to the day of  
1386 primary tumor resection. Points and lines represent individual mice. n= 9 (AKTP), 24 (AKP) mice.  
1387 **j**, Schematic representation of a novel tissue-dissociation strategy that enables recovery of DTCs  
1388 from livers. Whole livers are dissected and minced thoroughly. After a mild collagenase IV  
1389 digestion, samples are filtered through 100  $\mu$ m meshes. The filter retained sample is highly  
1390 enriched in tumor cells. Remaining tissue in the filter is re-digested with a stronger enzymatic  
1391 cocktail to fully digest it, and then re-filtered. **k**, Representative bioluminescent image of a whole  
1392 liver sample containing luciferase+ tumor cells before enzymatic digestion (B, input), after filtering  
1393 through 100  $\mu$ m (B') and 40  $\mu$ m (B'') meshes (previous protocol), and after recovering and re-  
1394 digesting tissue retained in the 100  $\mu$ m filter (B'''). **l**, Image showing the large cell pellet containing

1395 liver cells after 1 mild digestion and the small pellet in the retained and re-digested sample  
1396 enriched in DTCs. **m**, Percentage of GFP+ cells measured by flow cytometry in samples with 1  
1397 round of digestion compared to re-digested samples. Boxes represent the first, second (median)  
1398 and third quartiles. Whiskers indicate maximum and minimum values. Paired two-sided Wilcoxon  
1399 test on percentages. n=6 independent paired samples examined in 2 independent experiments.  
1400 **n**, Representative bioluminescent images, tumor burden and flow-cytometry plots of the 4  
1401 different stages analyzed by single-cell Smart-sequencing described in Fig. 2. Micrometastases  
1402 samples were DTCs collected from livers with absent or low bioluminescence in which metastases  
1403 were not visible. For small metastases samples, metastatic nodules were visible but small in size  
1404 (<1.5mm). Macrometastases samples were metastatic nodules larger than 4mm.

1405

1406 **Extended Data Fig. 4 | Additional description of residual AKTP and AKP metastatic cells.**

1407 **a**, UMAPs of colorectal primary tumors and liver metastases at different stages (micro, small and  
1408 large) colored according to sequencing batch, mouse ID, and sample ID. **b**, UMAPs showing the  
1409 expression levels of coreHRC, EpiHR, and mKi67 gene signatures and *Lgr5* and *Krt20* genes. **c**,  
1410 Violin plots showing expression of relevant genes used to define the 6 different Seurat clusters.  
1411 **d**, Fraction of cells (y axis) from each Seurat cluster (x axis) present in the different sample types:  
1412 Primary Tumor, micro-, small- and macro- metastases according to the indicated color code. Note  
1413 the “HRCs Krt20-” are mostly exclusive from micro metastases samples, whereas *Lgr5*+ cells are  
1414 highly enriched in small metastases samples. **e**, Smoothed *Krt20* gene and partial EMT gene  
1415 signature<sup>17</sup> expression trends fitted with Generalized Additive Models as a function of pseudotime  
1416 in primary tumors, micro+small and large metastases. **f,g**, UMAP of AKP liver micrometastases  
1417 colored according to timing of profiling and Seurat clusters. **h**, Barplot showing proportion of  
1418 different Seurat tumor cell types captured in AKP early vs late micrometastases. **i-l**, UMAPs  
1419 showing the expression levels of the coreHRC, mKi67 and *Mex3a* gene signatures and *Lgr5*  
1420 mRNA in AKP metastases. **m**, Barplot showing Seurat cluster distribution across AKP early and  
1421 late micrometastases. **n**. Violin plots showing expression levels of the *Mex3a* signature<sup>16</sup> in AKP  
1422 early and late micrometastases versus AKTP micro and small metastases. **o**, Vector fields  
1423 representing RNA velocity projected on UMAPs of AKP micrometastases. Colored by the  
1424 pseudotime estimated for each cell with scVelo. **p**, Smoothed coreHRC, mKi67, and *Lgr5* gene  
1425 signature expression trends in the early and late AKP micrometastasis dataset fitted with  
1426 Generalized Additive Models as a function of CellRank pseudotime.

1427

1428 **Extended Data Fig. 5 | Epithelial membrane protein 1 (EMP1) marks HRCs.**

1429 **a**, Scatter plot showing the correlation value between individual genes in the human SMC cohort  
1430 (x axis) and in mouse primary tumors (y axis) with the EpiHR signature. Genes with correlation  
1431 scores higher than 0.8 in both datasets are highlighted. **b**, UMAP of tumor cells from CRC patients  
1432 in the SMC dataset colored according to the expression of EpiHR signature (left) and of *EMP1*  
1433 gene (right). **c**, As in **b**, for CRC tumor cells from the KUL datasets. **d**, UMAP representation of  
1434 Smart-sequencing single cell data of AKTP mouse tumor cells along metastatic relapse sequence  
1435 colored by the EpiHR signature (left) and *Emp1* gene (right). **e**, Vector fields representing RNA  
1436 velocity projected on AKTP primary CRC, micro+small and macro metastases UMAPs, colored  
1437 by the pseudotime estimated for each cell with scVelo. **f**, AKTP tumor cell UMAPs colored by  
1438 *Emp1* gene expression. **g**, Smoothed *Emp1* gene expression trends fitted with Generalized  
1439 Additive Models as a function of pseudotime in AKTP primary tumor, micro+small and macro  
1440 metastases samples. **h**, UMAP representation of AKP micrometastases colored by *Emp1* gene  
1441 expression. **i**, Smoothed *Emp1* gene expression trends fitted with Generalized Additive Models  
1442 as a function of pseudotime in AKP micrometastases samples. **j**, Representative flow cytometry  
1443 plot of TOM expression in *wild-type* and *Emp1-iCT* AKTP MTOs. **k**, Relative mRNA expression in  
1444 *Emp1-TOM<sup>high</sup>* and *Emp1-TOM<sup>low</sup>* sorted cell populations from *Emp1-iCT* AKTP MTOs *in vitro*.  
1445 Two-sided t-test after normalizing by *Ppia*. n=3 technical replicates. Mean +/- SD. **l**, Boxplot  
1446 showing normalized intensity of coreHRC signature expression in *Emp1-TOM<sup>high</sup>* and *Emp1-*  
1447 *TOM<sup>low</sup>* cells dissociated from primary tumors 4 weeks post-implantation. Box plots have whiskers  
1448 of maximum 1.5 times the interquartile range; boxes represent first, second (median) and third  
1449 quartiles. n=4 mice per condition. ROAST-GSA adjusted p-values are shown.

1450

### 1451 **Extended Data Fig. 6 | HRCs are enriched in invasion fronts and micrometastases.**

1452 **a**, Primary tumor outlined by cyan line and colored in 4 different regions identified with HALO  
1453 image analysis classifier (tumor-red, stroma-green, background-yellow, necrosis-blue). Scale bar,  
1454 1mm. **b**, TOM cell intensity analysis in the tumor area after segmentation into individual cells. B'  
1455 and B'' show magnified regions corresponding to tumor core (B') and invasion fronts + tumor buds  
1456 (B''). Scale bars, 1mm (B), 100  $\mu$ m (B' and B''). **c**, Representative immunostaining of TOM and  
1457 E-CADH in the tumor core and in tumor buds of primary tumors derived from *Emp1-iCT* MTOs 4  
1458 weeks post implantation in the caecum. TOM fluorescence is shown with mpl-inferno LUT. The  
1459 dashed line delimits the caecum edge. Arrows point to tumor buds. Scale bars, 100  $\mu$ m (tumor  
1460 core) 50  $\mu$ m (tumor buds). **d**, Quantification of *Emp1-TOM<sup>high</sup>* (defined as cells in percentile 90 for  
1461 TOM expression) in the tumor core (submucosal area), invasion fronts (inside muscular layer)  
1462 and isolated glands (over muscular layer). Boxes represent the first, second (median) and third

1463 **quartiles. Whiskers indicate maximum and minimum values.** Two-sided Wilcoxon test on  
1464 percentages. n= 8 mice. **e**, Immunofluorescence of TOM, CD31 and DAPI in primary tumors.  
1465 Amplified insets show the tumor core and invasive glands intermingled in mucosal layers (ML)  
1466 next to blood vessels. Dashed lines outline healthy intestinal epithelium. Scale bars, 250  $\mu\text{m}$ , 100  
1467  $\mu\text{m}$  (tumor core) and 50  $\mu\text{m}$  (tumor buds). **f**, Representative flow cytometry plot of TOM expression  
1468 in *wild-type* and Emp1-iCT AKP MTOs. **g**, Relative mRNA expression in Emp1-TOM<sup>high</sup> and  
1469 Emp1-TOM<sup>low</sup> sorted cell populations from Emp1-iCT AKP MTOs. Two-sided t-test after  
1470 normalizing by *Ppia*. n=3 technical replicates. Mean +/- SD. **h**, Representative immunostaining  
1471 for TOM and E-CADHERIN in Emp1-iCT AKP tumors implanted in the caecum 4 weeks post-  
1472 implantation. Emp1-TOM fluorescence is shown with an mpl-inferno LUT. Dashed lines delimit  
1473 the edge of the caecum. Scale bar: 250  $\mu\text{m}$ . **i**, Representative images of TOM and E-CADHERIN  
1474 staining in micro (left) and medium (right) size metastases. Scale bars: 50  $\mu\text{m}$  and 250  $\mu\text{m}$ . **j**,  
1475 Percentage of tumor area containing TOM-high and low fluorescent pixels versus metastases  
1476 size (in pixels). Each dot represents an individual metastasis. **k**, TOM, KRT20 and E- CADHERIN  
1477 staining in primary tumors generated by Emp1-iCasp9-tdTomato AKTP MTOs. Dashed lines  
1478 encompass invasion fronts and tumor buds. KRT20 staining is observed in normal mucosa (NM)  
1479 and to a lesser extent in the tumor core. Tumor cell clusters invading the muscular layer (ML)  
1480 express high levels of TOM and no KRT20. Amplified insets show an example of tumor core (K')  
1481 and invasion fronts (K'') with TOM (left) and KRT20 (right) stainings. Scale bars, 500  $\mu\text{m}$  (k) and  
1482 100  $\mu\text{m}$  (K' and K''). **l**, Immunofluorescence of TOM and E-CADHERIN (left) and KRT20 and E-  
1483 CADHERIN (right) in a cluster of tumor cells that enter the liver through a portal vein (PV, delimited  
1484 with dashed lines). Scale bar, 50  $\mu\text{m}$ .

#### 1485 **Extended Data Fig. 7 | HRCs retain an epithelial phenotype.**

1486 **a**, Immunostaining of E-CADHERIN and TOM in Emp1-iCT primary tumors 4 weeks post-  
1487 implantation of MTOs. Arrows point at examples of E-CADHERIN+ invasion fronts and tumor  
1488 buds. Dashed lines show the caecum edge. Scale bars, 100  $\mu\text{m}$ . **b**, Boxplot showing normalized  
1489 expression of genes related to EMT in Emp1-TOM<sup>high</sup> versus Emp1- TOM<sup>low</sup> cells. Box plots have  
1490 whiskers of maximum 1.5 times the interquartile range; Boxes represent first, second (median)  
1491 and third quartiles. **P-value** for differential expression with Linear Model for Microarray Analysis  
1492 (limma). n=4 biological replicates. **c-d**, Violin plots showing expression of selected EMT-related  
1493 genes in HRCs versus the rest of other cells in mouse epithelial primary tumor cells (**c**) and human  
1494 tumor cells from the SMC cohort (**d**). Genes present in **b** not shown (*Snai1* and *Snai2*) were  
1495 undetected in (**c**). **e**, Representative example of *EMP1* mRNA FISH combined with LAMC2

1496 immunofluorescence on human primary CRC tissue section showing an overlapping pattern of  
1497 expression of *EMP1* and LAMC2 in invasion fronts and tumor buds (arrows). Scale bar, 100  $\mu$ m.  
1498 **f**, Representative example of *EMP1* mRNA FISH combined with KRT17 and EPCAM  
1499 immunofluorescence on human primary CRC tissue sections showing an overlapping pattern of  
1500 expression of *EMP1* and KRT17 in invading fronts and tumor cell clusters (arrows). Scale bars,  
1501 100  $\mu$ m. **g**, Violin plots showing enrichment of *LAMC2*, *KRT17* and several cell-to-cell adhesion  
1502 genes in HRCs (SMC cohort).

1503

#### 1504 **Extended Data Fig. 8 | Emp1 and Lgr5 mark distinct tumor cell populations.**

1505 **a**, Emp1-iCasp9-tdTomato and Lgr5-EGFP alleles introduced in AKTP MTOs. Confocal imaging  
1506 of TOM, EGFP and E-CADHERIN immunostaining in edited MTOs. Single z-plane. Scale bar, 10  
1507  $\mu$ m. **b**, Relative mRNA expression in EGFP-high/TOM-low and EGFP-low/TOM-high sorted cells  
1508 dissociated from subcutaneous AKTP Emp1-iCT Lgr5-EGFP tumors. Two-sided t-test after  
1509 normalizing by *PPIA*. Mean +/- SD. **n= 3 technical replicates**. **c**, Immunostaining of TOM, EGFP  
1510 and E-CADHERIN in Emp1-iCT Lgr5-EGFP primary tumors 4 weeks post-implantation of MTOs  
1511 in the caecum. Dashed lines encompass tumor buds. Scale bar, 250  $\mu$ m. **d**, Scatter plot showing  
1512 normalized Emp1-TOM intensity versus normalized Lgr5-EGFP intensity in 855,330 cells from 18  
1513 different primary tumors. Note the absence of double positive cells (TOM and EGFP high). **e**,  
1514 Representative immunofluorescence staining of TOM, EGFP and E-CADHERIN in liver  
1515 metastases of increasing size (micro, small, medium) generated from the mouse CRC relapse  
1516 model. Scale bars, 25  $\mu$ m (micro) 100  $\mu$ m (small) 250  $\mu$ m (medium). **f**, Scatter plot showing TOM  
1517 intensity versus EGFP intensity in 318,276 cells from 137 different liver metastases. Note the  
1518 absence of double positive cells (TOM and EGFP high). **g-p**, Examples of dual *EMP1* and *LGR5*  
1519 mRNA ISH combined with E-CADHERIN immunofluorescence on human primary CRC tissue  
1520 sections demonstrating a mutually exclusive pattern of expression of *EMP1* and *LGR5*. Note that  
1521 *EMP1* expression is elevated in invasion fronts and tumor cell buds (white arrows). Scale bars,  
1522 500  $\mu$ m (l, p) 250  $\mu$ m (g, h, i, j, m, n, o) 50  $\mu$ m (H', k).

1523

#### 1524 **Extended Data Fig. 9 | YAP/TAZ signaling is not required for HRC specification.**

1525 **a-c**, Violin plots comparing the expression of genes belonging to the YAP-22 core signature<sup>32</sup> (**a**),  
1526 the top 50 genes from the Fetal intestine progenitor signature<sup>31</sup> (**b**) and the top 50 genes of the  
1527 coreHRC signature (**c**) in HRCs vs other cells in the SMC scRNAseq cohort. **d**, Venn Diagram  
1528 showing genes that overlap between the coreHRC signature and YAP-22 or Fetal intestine

1529 progenitor signatures. **e**, Boxplot showing normalized intensity of YAP-22 signature expression in  
1530 Emp1-TOM<sup>high</sup> and Emp1-TOM<sup>low</sup> cells dissociated from primary tumors 4 weeks post-  
1531 implantation. Box plots have whiskers of maximum 1.5 times the interquartile range; boxes  
1532 represent first, second (median) and third quartiles. n=4 mice per condition. ROAST-GSA  
1533 adjusted p-values are shown. **f**, Relative mRNA expression measured by RT-qPCR in Emp1-  
1534 TOM<sup>high</sup> and Emp1-TOM<sup>low</sup> sorted cell populations from AKTP Emp1-iCT primary CRCs. Two-  
1535 sided t-test after normalizing by *PPIA*. n=4 biological replicates. Mean +/- SD. **g**, Western blot for  
1536 YAP and VINCULIN in non-infected, shControl and shYap infected AKTP organoids. **h**, Western  
1537 blot quantification of YAP normalized by Vinculin. **i**, Relative mRNA expression (mean ± SD) in  
1538 MTOs infected with shControl plasmid compared to uninfected MTOs and MTOs infected with  
1539 three different shYAP plasmids. Analyzed with a mixed effects linear model after normalizing by  
1540 *PPIA* housekeeping gene. n= 2 biological replicates with 3 technical replicates. **j**, Percentage  
1541 (mean ± SD) of Emp1-TOM<sup>high</sup> cells in organoids infected with shControl or shYAP plasmids. Two-  
1542 sided Wilcoxon t-test. n= 3 (sh67) 7 (all other) measurements examined over 4 independent  
1543 experiments. **k**, Relative mRNA expression (mean ± SD) in MTOs infected with pInducer GFP-  
1544 TEADi plasmid treated or untreated with doxycycline (DOX). GFP+ cells were sorted in DOX  
1545 treated organoids, whereas alive cells were sorted in untreated MTOs. n= 3 technical replicates.  
1546 Analyzed with a mixed effects linear model after normalizing by *PPIA* housekeeping gene. **l**,  
1547 Representative flow cytometry plot showing Emp1-TOM fluorescence versus pInducer GFP-  
1548 TEADi fluorescence in TEADi MTOs untreated or treated with DOX. **m**, Quantification (mean ±  
1549 SD) of Emp1-TOM<sup>high</sup> in TEADi MTOs untreated or treated with DOX for 5 days. Two-sided  
1550 Wilcoxon t-test. n= 2 biological replicates with 3 technical replicates. **n**, Boxplot showing  
1551 expression levels (normalized intensity) of YAP-22, Fetal and coreHRC signature genes in control  
1552 MTOs versus MTOs treated with chemotherapy (folfiri) for 4 days. Boxes represent the first,  
1553 second (median) and third quartiles. Whiskers indicate maximum and minimum values. n=3  
1554 biological replicates per condition. Two-sided t-test. **o**, Boxplot showing the expression levels of  
1555 relevant genes in control MTOs versus MTOs treated with chemotherapy (folfiri) for 4 days. Boxes  
1556 represent the first, second (median) and third quartiles. Whiskers indicate maximum and minimum  
1557 values. n=3 biological replicates per condition. Two-sided t-test.

1558

1559 **Extended Data Fig. 10 | KRAS mutations and CAFs specify the HRC population.**

1560 **a-b**, Normalized intensity of EpiHR and coreHRC signature expression in CTOs grouped by gain  
1561 of function mutation in *Kras* g12d and loss of function mutations in *p53*, *Smad4* and *Tgfb2*. Box



1562 plots have whiskers of maximum and minimum values; boxes represent first, second (median)  
1563 and third quartiles. n= 6 (WT) 5 (MUT) CTOs; 2 technical replicates. [P-values for two-sided T-](#)  
1564 [tests.](#) **c**, Percentage of Emp1<sup>high</sup> tumor cells (defined as the top 10% of the TOM population in  
1565 control MTOs, mean  $\pm$  SD) in parental (non-infected), control shRNA or shRNAs targeting YAP1.  
1566 n=5 biological replicates. P-value for [two-sided](#) t-test. **d**, Normalized intensity of the coreHRC  
1567 signature expression in control MTOs versus MTOs co-cultured with colon fibroblasts. [Box plots](#)  
1568 [have whiskers of maximum 1.5 times the interquartile range; boxes represent first, second](#)  
1569 [\(median\) and third quartiles. n= 4 biological replicates. ROAST-GSA adjusted p-value is shown.](#)  
1570 **e**, Representative images of MTOs Emp1-iCT Lgr5-EGFP co-cultured with colon fibroblasts.  
1571 Maximum intensity projection of confocal stacks, step 4  $\mu$ m, z stack 120  $\mu$ m. Scale bar,  
1572 50  $\mu$ m. **f**, Immunostaining of  $\alpha$ -SMA Emp1-iCT Lgr5-EGFP MTOs co-cultured with colon  
1573 fibroblasts for 2 days. Scale bars, 100  $\mu$ m. **g**, Immunostaining of KRT17 in 4-days grown MTO  
1574 Emp1-iCT organoids: fibroblast co-cultures and organoids alone control cultures. Scale bars, 50  
1575  $\mu$ m. **h**, Ablation by dimerizer (DIM) treatment and surgery schedule of mice with AKTP Emp1-iCT  
1576 primary tumors to assess the recovery of HRCs upon treatment cessation. **i**, Percentage ([mean](#)  
1577  [\$\pm\$  SD](#)) of Emp1-TOM<sup>high</sup> cells (defined as top 10% in control animals) in untreated mice versus  
1578 mice treated with DIM, with treatment discontinued at various timepoints post-injection. [Two-sided](#)  
1579 [T-test. n= 3 \(control\) 4 \(rest\) mice.](#) **j**, Representative immunostainings showing effective Emp1-  
1580 TOM<sup>high</sup> cell ablation in DIM-treated primary tumors and recovery upon treatment cessation.  
1581 Dashed lines delimitate the caecum edge. Scale bars, 250  $\mu$ m. **k**, Lung metastases (mean  $\pm$  SD)  
1582 generated by MTO Emp1-iCT up to one month after primary tumor resection, treated with vehicle  
1583 or DIM as in Fig. 4a. Each dot is a mouse; n= 34 (control) 29 (DIM). P-value for generalized linear  
1584 model with negative binomial family. **l**, Inducible ablation schedule of nude mice (*nu/nu*)  
1585 implanted with AKTP Emp1-iCT primary tumors. Resection was not possible due to local  
1586 spreading of tumors to neighboring tissue. **m**, Primary tumor area (mean  $\pm$  SD) measured at  
1587 sacrifice. Each dot is a mouse; n= 4 (control), 5 (DIM) mice. P-value for linear model. **n**, Liver  
1588 metastases (mean  $\pm$  SD) generated by MTO Emp1-iCT. Each dot is a mouse; n= 4 (control), 6  
1589 (DIM) mice. P-value for generalized linear model. **o**, Schematics of an experiment to analyze the  
1590 potential of Emp1+, Lgr5+ or double negative (DN) cells to colonize the liver and generate  
1591 metastases. 25,000 FACS-sorted Emp1-TOM-high, Lgr5-EGFP-high or double negative cells  
1592 were injected intrasplenically. **p**, Metastatic growth measured by BLI. **q**, Liver metastases (mean  
1593  $\pm$  SD) generated by Emp1-high, Lgr5-high or double negative cells. Each dot is a mouse; n= 5  
1594 mice. P-value for generalized linear model. **r**, [Distribution of liver metastasis diameters \(mean  \$\pm\$](#)   
1595 [SD\).](#) n=5 mice per condition. **s**, Percentage ([mean  \$\pm\$  SD](#)) of Emp1-TOM<sup>high</sup>, Lgr5-EGFP<sup>high</sup> and

1596 double negative tumor cells in metastases generated by the injection of Emp1-TOM<sup>high</sup>, Lgr5-  
1597 EGFP<sup>high</sup> and double negative cells, n= 9 (Emp1 and Lgr5) and 10 (DN) mice. [Two-sided t-test.](#)  
1598 **t**, Experimental setup showing inducible HRC ablation after surgery of primary AKPT  
1599 CRCs. **u**, Liver metastases (mean ± SD) generated by MTO Emp1-iCT in mice treated with  
1600 vehicle or DIM 1 day after primary tumor resection and until experimental endpoints. Each dot is  
1601 a mouse; n=30 (control) 12 (DIM) mice P-value for generalized linear model. **v**, Percentage ([mean](#)  
1602 [± SD](#)) of small (diameter equal or smaller than 1 mm<sup>2</sup>) and big metastases (bigger than 1 mm<sup>2</sup>)  
1603 in mice treated with vehicle or DIM 1 day after primary tumor resection and until experimental  
1604 endpoints. Mixed effects linear model after boxcox transformation with mouse as random  
1605 effect, [n= 20 \(control\) and 7 \(DIM\) mice](#). **w**, Percentage of mice that developed liver metastases  
1606 in control and Emp1-ablated mice. Analyzed with a generalized linear model.

1607

1608 **Extended Data Fig. 11 | Metastatic relapse in different mouse CRC models arises from**  
1609 **HRCs.**

1610 **a**, Inducible ablation and surgery schedule of mice with AKP Emp1-iCT primary tumors. Panels A  
1611 and A' show immunostaining of TOM and E-CADHERIN demonstrating effective ablation of  
1612 Emp1-high cells in primary CRCs. Dashed lines delimitate the caecum edge. Scale bars, 500 µm.

1613 **b**, Primary tumor area (mean ± SD) measured after resection. Each dot is a mouse, n= 12 (control)  
1614 and 6 (DIM) mice. P-value for linear model after boxcox transformation. **c**, Liver metastases (mean  
1615 ± SD) generated by MTO AKP Emp1-iCT up to one month after primary tumor resection. Each  
1616 dot is a mouse, [n= 12 \(control\) and 6 \(DIM\) mice](#). P-value for generalized linear model with  
1617 negative binomial family. Bottom panel indicates the percentage of mice that developed liver  
1618 metastases in the same experiment. Analyzed with a two-sided fisher test. **d**, Inducible ablation

1619 and surgery schedule of mice with AKPS Emp1-iCT primary tumors. Panels D and D' show  
1620 immunostaining of TOM demonstrating effective ablation of Emp1-TOM<sup>high</sup> cells in DIM-treated  
1621 primary tumors. Dashed lines delimitate the caecum edge. Scale bars, 250 µm. **e**, Primary tumor  
1622 area (mean ± SD) measured after resection. Each dot is a mouse, n= 17 (control) and 19 (DIM)

1623 mice. P-value for linear model after boxcox transformation. **f**, Liver metastases (mean ± SD)  
1624 generated by MTO AKPS Emp1-iCT up to one month after primary tumor resection. Each dot is  
1625 a mouse, n as in panel **e**. P-value for generalized linear model with negative binomial family.  
1626 Bottom panel indicate the percentage of mice that developed liver metastases in the same  
1627 experiment. Analyzed with a two-sided fisher test. **g**, Inducible ablation schedule of mice

1628 implanted with AKTP Emp1-iCT MTOs in the rectum. **h**, Longitudinal intravital BLI quantification  
1629 of AKTP MTOs implanted in the rectum. **i**, Representative TOM and E-CADHERIN

1630 immunostainings of lungs from mice bearing AKTP rectal tumors. Lung metastases of increasing  
1631 size are shown. Note that TOM expression is higher in micrometastases and progressively  
1632 reduced. Scale bars, 50  $\mu\text{m}$ . **j**, Primary rectal tumor area (mean  $\pm$  SD) measured at sacrifice.  
1633 Each dot is a mouse, n= 9 (control) and 10 (DIM) mice. P-value for linear model after boxcox  
1634 transformation. **k**, Lung (left panel) and liver (middle panel) metastases (mean  $\pm$  SD) generated  
1635 by MTO Emp1-iCT injected in the rectum. Each dot is a mouse, n as in panel **j**. P-value for  
1636 generalized linear model with Poisson family. Right panel shows the percentage of mice that  
1637 developed metastases in the same experiment. Analyzed with a two-sided fisher test. **l**, CRISPR-  
1638 Cas9 targeting strategy to introduce an DTR-GFP cassette into the *Lgr5* locus of MTOs. Confocal  
1639 imaging of immunostaining for EGFP and EPCAM in *Lgr5*-DTR-EGFP organoids. Scale bar,  
1640 30 $\mu\text{m}$ . Right panel shows a representative flow cytometry plot of EGFP expression in wild-type  
1641 and *Lgr5*-EGFP organoids. **m**, Relative *Lgr5* mRNA expression (mean  $\pm$  SD) of *Lgr5*-EGFP<sup>high</sup>  
1642 versus -low cells isolated from *Lgr5*-DTR-EGFP subcutaneous tumors. n=3 biological replicates.  
1643 Two-sided t-test normalizing to *B2M*. **n**, Immunofluorescence showing EGFP and E-CADHERIN  
1644 in primary tumors. Insets (N' and N'') correspond to invasion fronts and tumor buds lacking EGFP  
1645 expression at higher magnification. Scale bars, 500  $\mu\text{m}$  (D) and 100  $\mu\text{m}$  (D' and D''). **o**,  
1646 Quantification of *Lgr5*-EGFP<sup>high</sup> cells (defined as cells in percentile 90 for EGFP expression) in  
1647 the tumor core, invasion fronts and tumor buds. Boxes represent the first, second (median) and  
1648 third quartiles. Whiskers indicate maximum and minimum values. Paired two-sided Wilcoxon test  
1649 on percentages. n= 11 mice. **p**, Representative images of *Lgr5*-EGFP staining in micro (P) and  
1650 small (P') metastases. Dashed lines and the yellow arrow surround a micrometastasis. Scale  
1651 bars: (F) 50  $\mu\text{m}$ ; (F') 250  $\mu\text{m}$ . **q**, Percentage of tumor area containing *Lgr5*-EGFP<sup>high</sup> and *Lgr5*-  
1652 EGFP<sup>low</sup> cells versus metastases size. Each dot represents an individual metastasis. **r**, CRISPR-  
1653 Cas9 targeting strategy to introduce an iCaspase-9-TOM cassette into the *LGR5* locus of AKTP  
1654 MTOs. **s**, Representative flow cytometry plot of TOM expression in *Lgr5*-iCasp9-tdTomato  
1655 organoids. **t**, Quantification of *Lgr5* mRNA (mean  $\pm$  SD) by RT-qPCR in *Lgr5*-TOM<sup>high</sup> and *Lgr5*-  
1656 TOM<sup>low</sup> cells dissociated from primary tumors grown for 4 weeks. n=3 primary tumors. Analyzed  
1657 with a mixed effects linear model. **u**, Timing of inducible ablation and surgery in mice implanted  
1658 with AKTP *Lgr5*-iCasp9-TOM primary tumors. **v**, Representative flow cytometry plot of *Lgr5*-TOM  
1659 fluorescence in controls versus dimerizer-treated mice. DAPI-/EPCAM+ cells are shown. **w**,  
1660 Percentage (mean  $\pm$  SD) of *Lgr5*<sup>high</sup> tumor cells (defined as the top 10% of the TOM+ population)  
1661 in control and treated mice. n=4 mice each group. Two-sided Wilcoxon test. **x**, Primary tumor area  
1662 measured after resection. n= 15 mice each group. Mean with SD, p-value of linear model after  
1663 boxcox transformation. **y**, Liver metastases counted at experimental endpoints after primary

1664 tumor resection. n= 16 (control) and 21 (Lgr5-ablation) mice. Mean  $\pm$  SD. Analyzed with a linear  
1665 model with negative binomial family. Left panel show the percentage of mice that developed liver  
1666 metastases in control and Lgr5-ablated tumors in the same experiment. Two-sided Fisher test.

1667

1668 **Extended Data Fig. 12 | Immune checkpoint immunotherapies prevent metastatic relapse.**

1669 **a**, Representative image of CD3+ cell distribution in primary AKTP CRC showing T cell exclusion.

1670 Arrows point to T cells located at the tumor periphery. **b**, Representative immunostaining of Emp1-

1671 TOM, CD3 and  $\alpha$ -SMA in primary tumors. Scale bars, 100  $\mu$ m. **c**, Dotplot summarizing regression

1672 models applied to multiplex immunofluorescence data. Effects of the total number of cells on the

1673 composition of every cell population are represented by different point sizes (defining the

1674 magnitude of the effect) and colors (showing both the sign of the effect in blue(-)/red(+)

1675 and the statistical significance by color intensity). **d**, Dotplot showing examples of interferon response

1676 genes across 6 tumor scRNAseq cell clusters as defined in Fig. 2g. **e**, Bioluminescence

1677 monitoring of the effect of the neoadjuvant immunotherapy regime used in Fig. 5k on primary

1678 tumor growth. Points and lines represent individual mice, trend lines (bold) show a LOESS model.

1679 n= 19 (control) 10 (PD1+CTLA4) mice. Mixed effects linear model with data normalized to time 0

1680 and mouse as random effect. **f**, Schematics of an experiment comparing metastatic relapse in

1681 untreated mice and mice treated with neoadjuvant treatment with anti-PD1 monotherapy or anti-

1682 PD1+/anti-CTLA4 combined therapy. **g**, Primary tumor area (mean  $\pm$  SD) measured after

1683 resection in the experiment described in **f**. Each dot is an individual mice. n= 10 mice each group.

1684 Linear model. **h**, Liver metastases (mean  $\pm$  SD) generated by AKTP primary tumors up to one

1685 month after primary tumor resection in the experiment described in **f**. Each dot is an individual

1686 mice. n= 9 (control), 8 (PD1), 10 (PD1/CTLA4). Generalized linear model of Poisson family. **i**,

1687 Percentage of mice that developed liver metastases or remained metastases-free at experimental

1688 endpoints (4 weeks after resection) in control and immunotherapy-treated tumors. n= 9 (control),

1689 8 (PD1), 10 (PD1/CTLA4). Generalized linear model with beta-binomial distribution.

Supplementary Data 1. Uncropped Western Blot related to Ext.Fig.9g

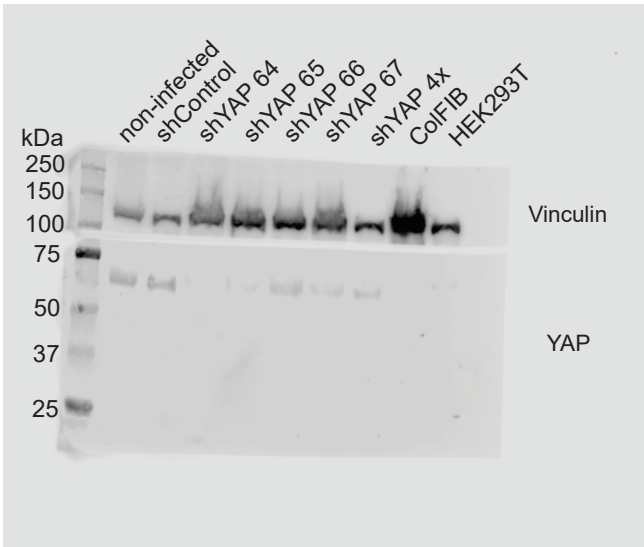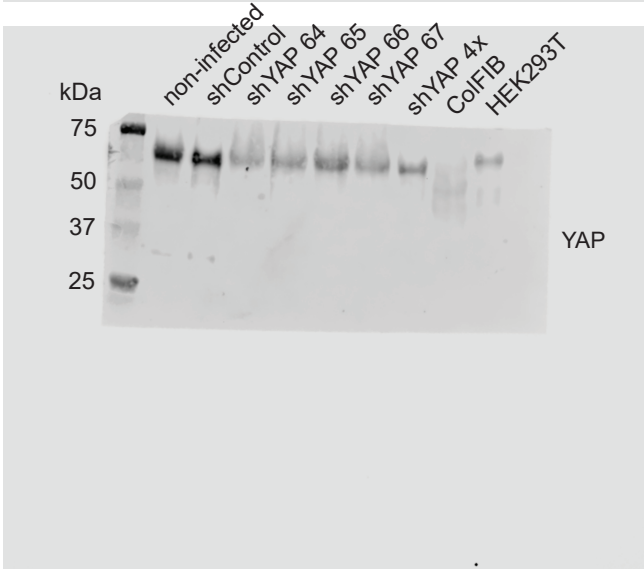

## Supplementary Data 2. Example of gating strategy

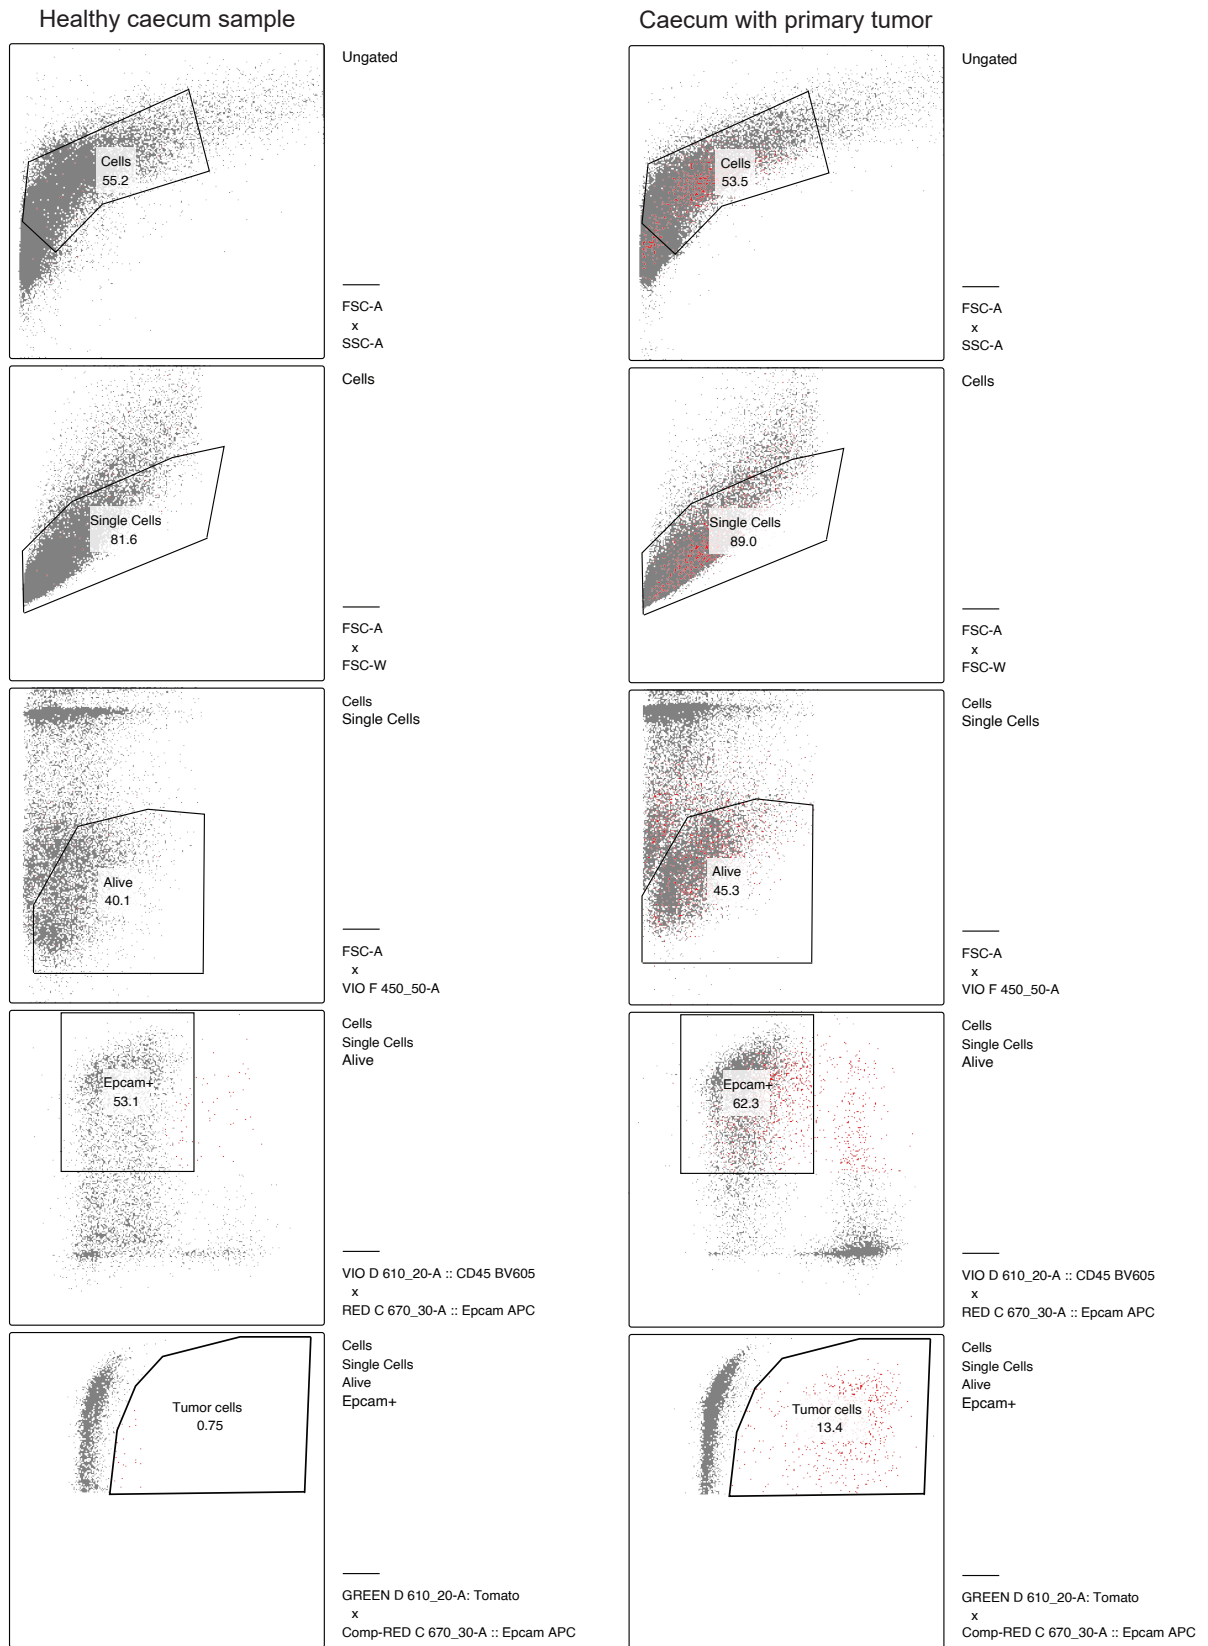

Extended Figures combined

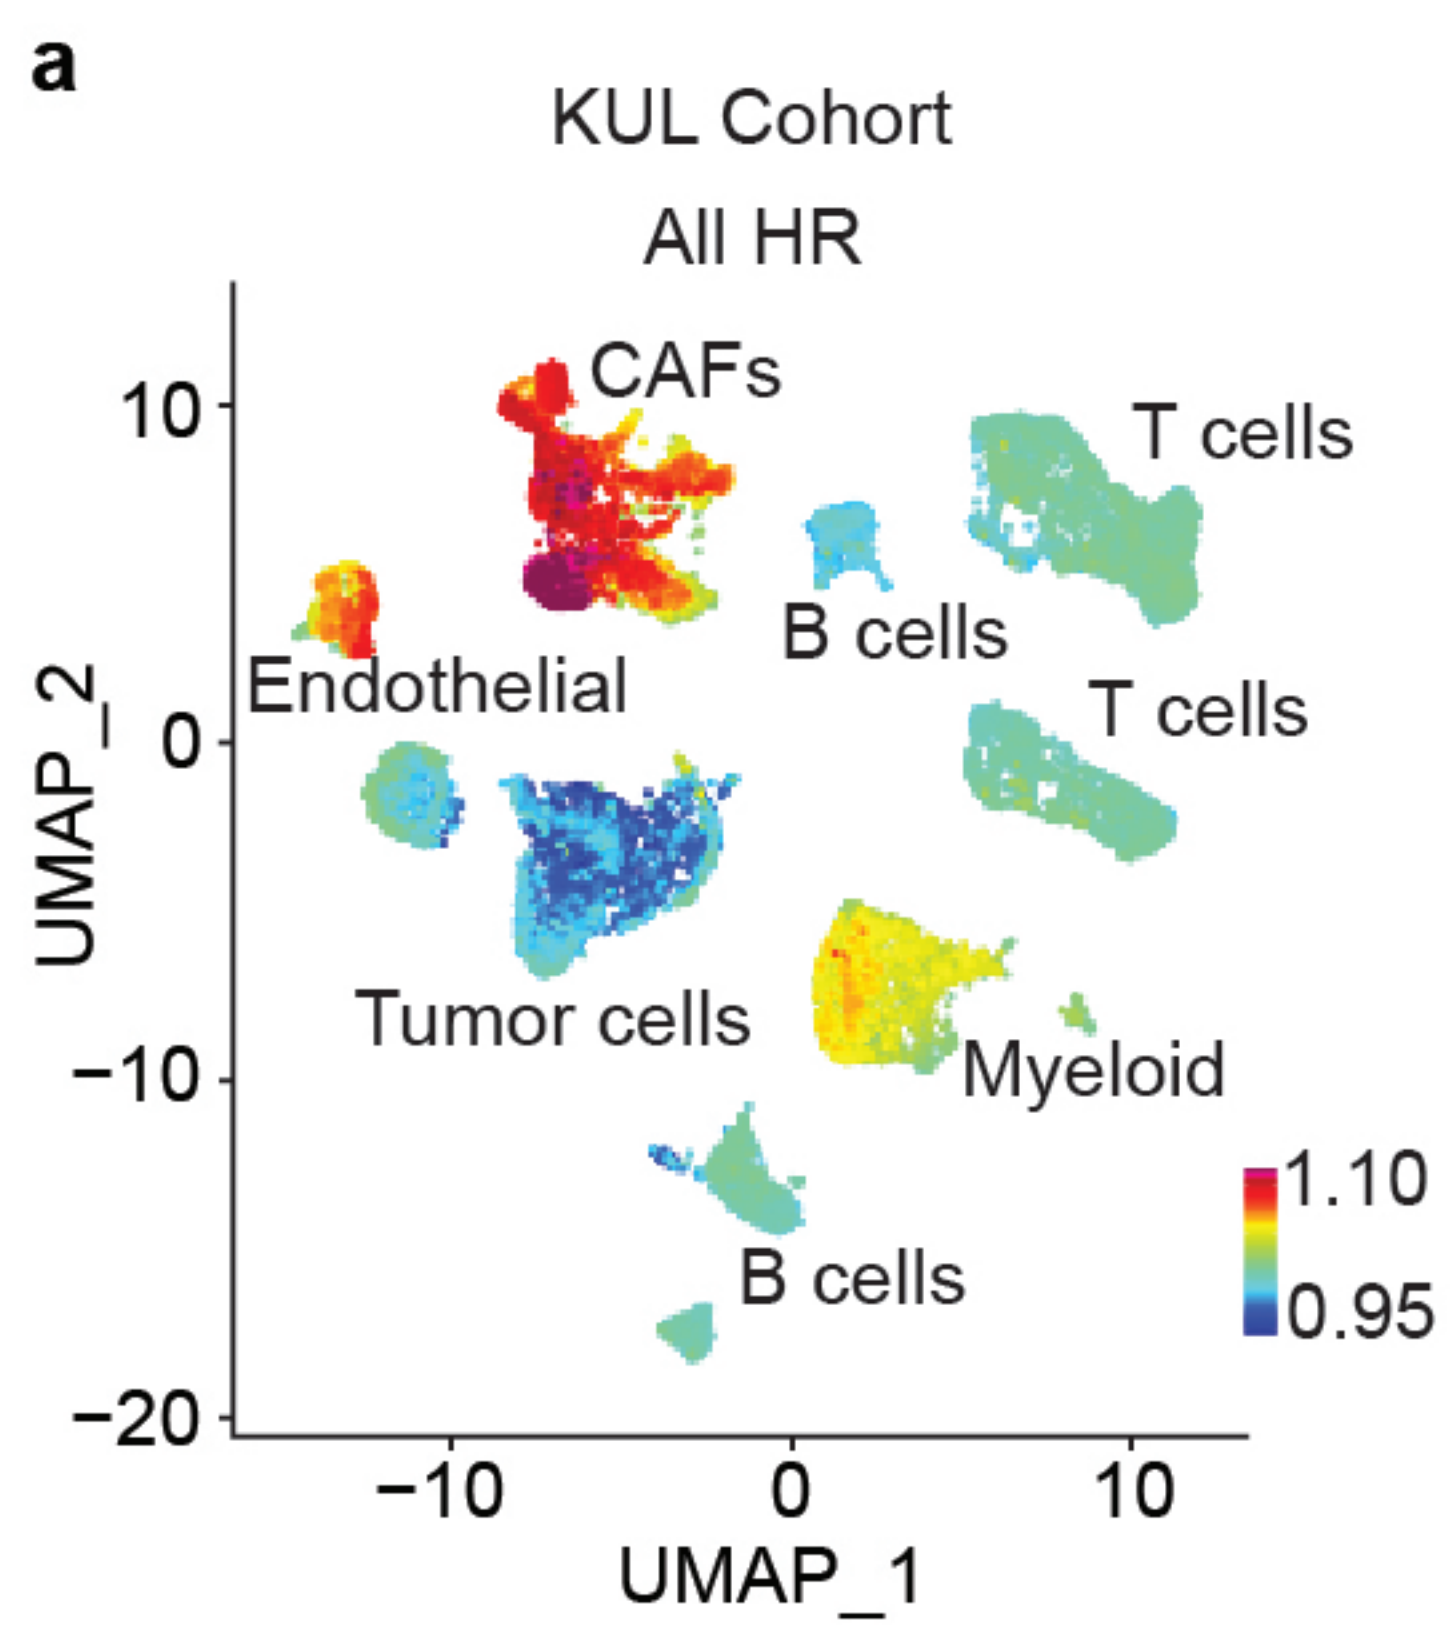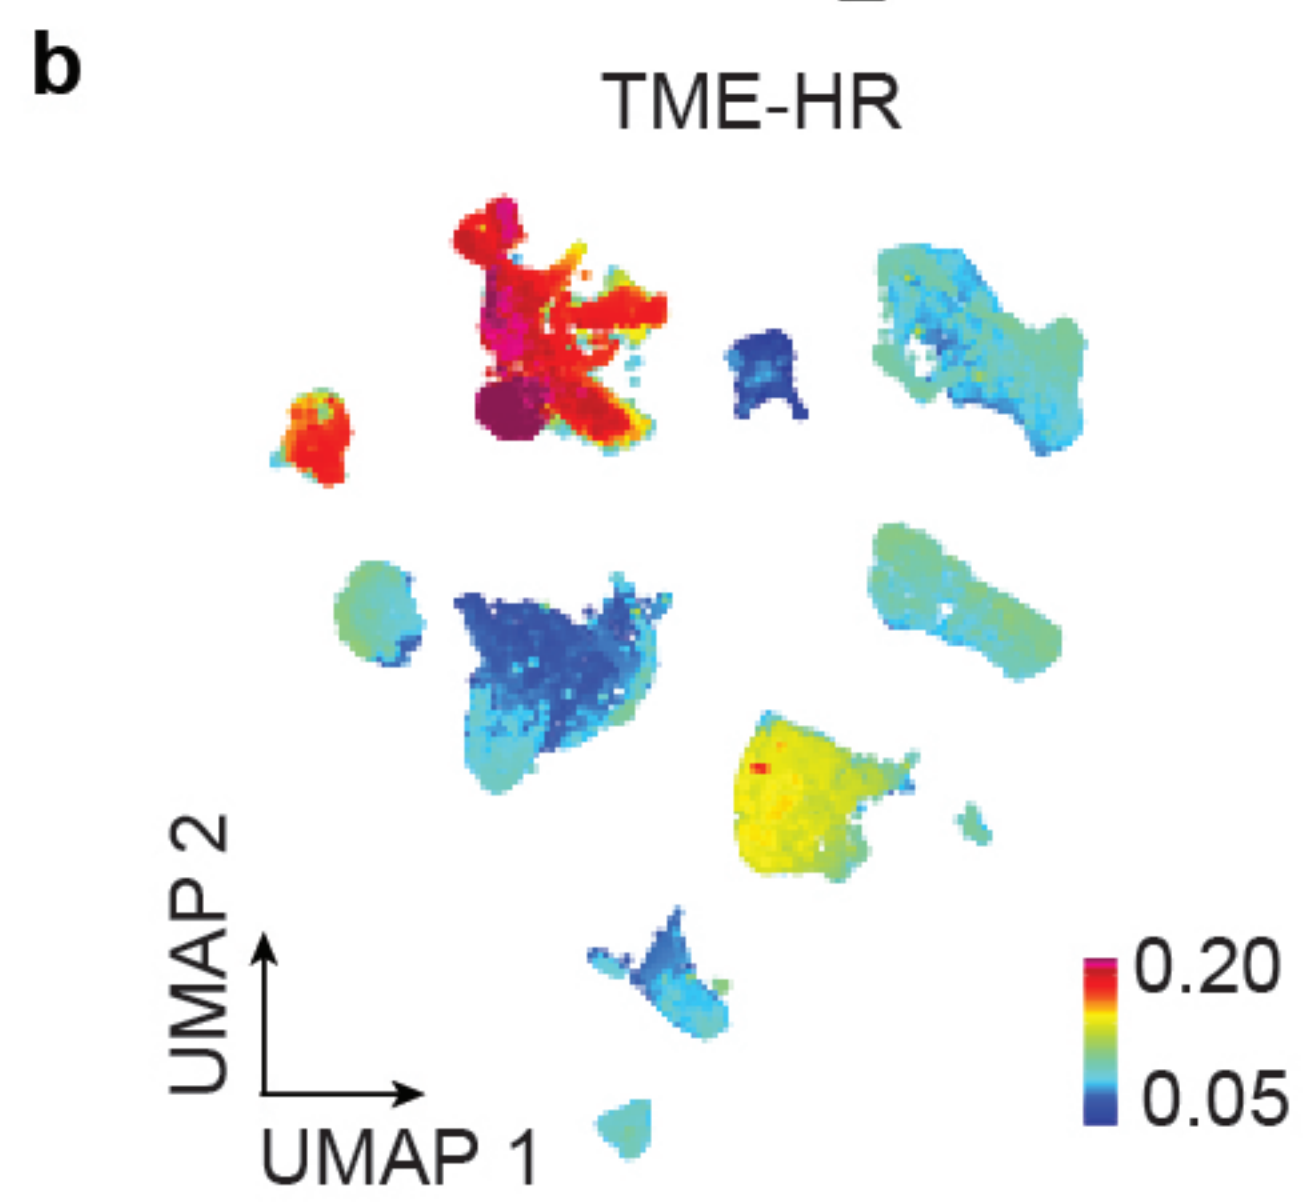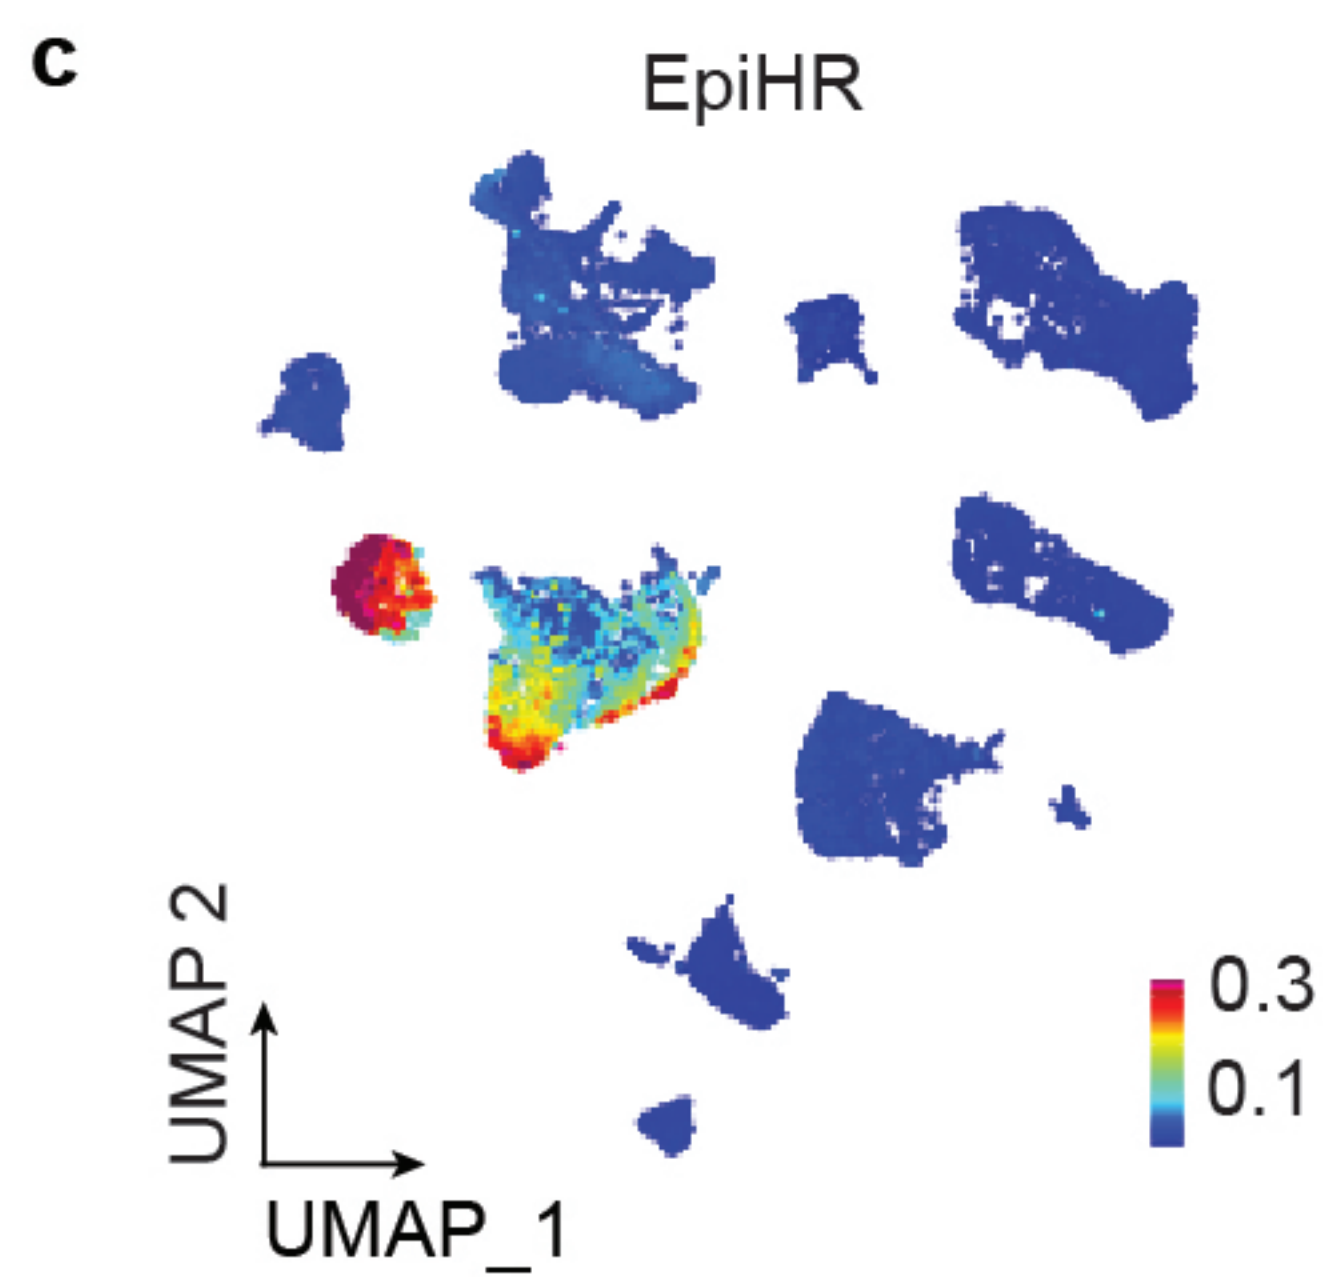

**h** Gene-gene correlation of EpiHR signature genes in human scRNAseq dataset

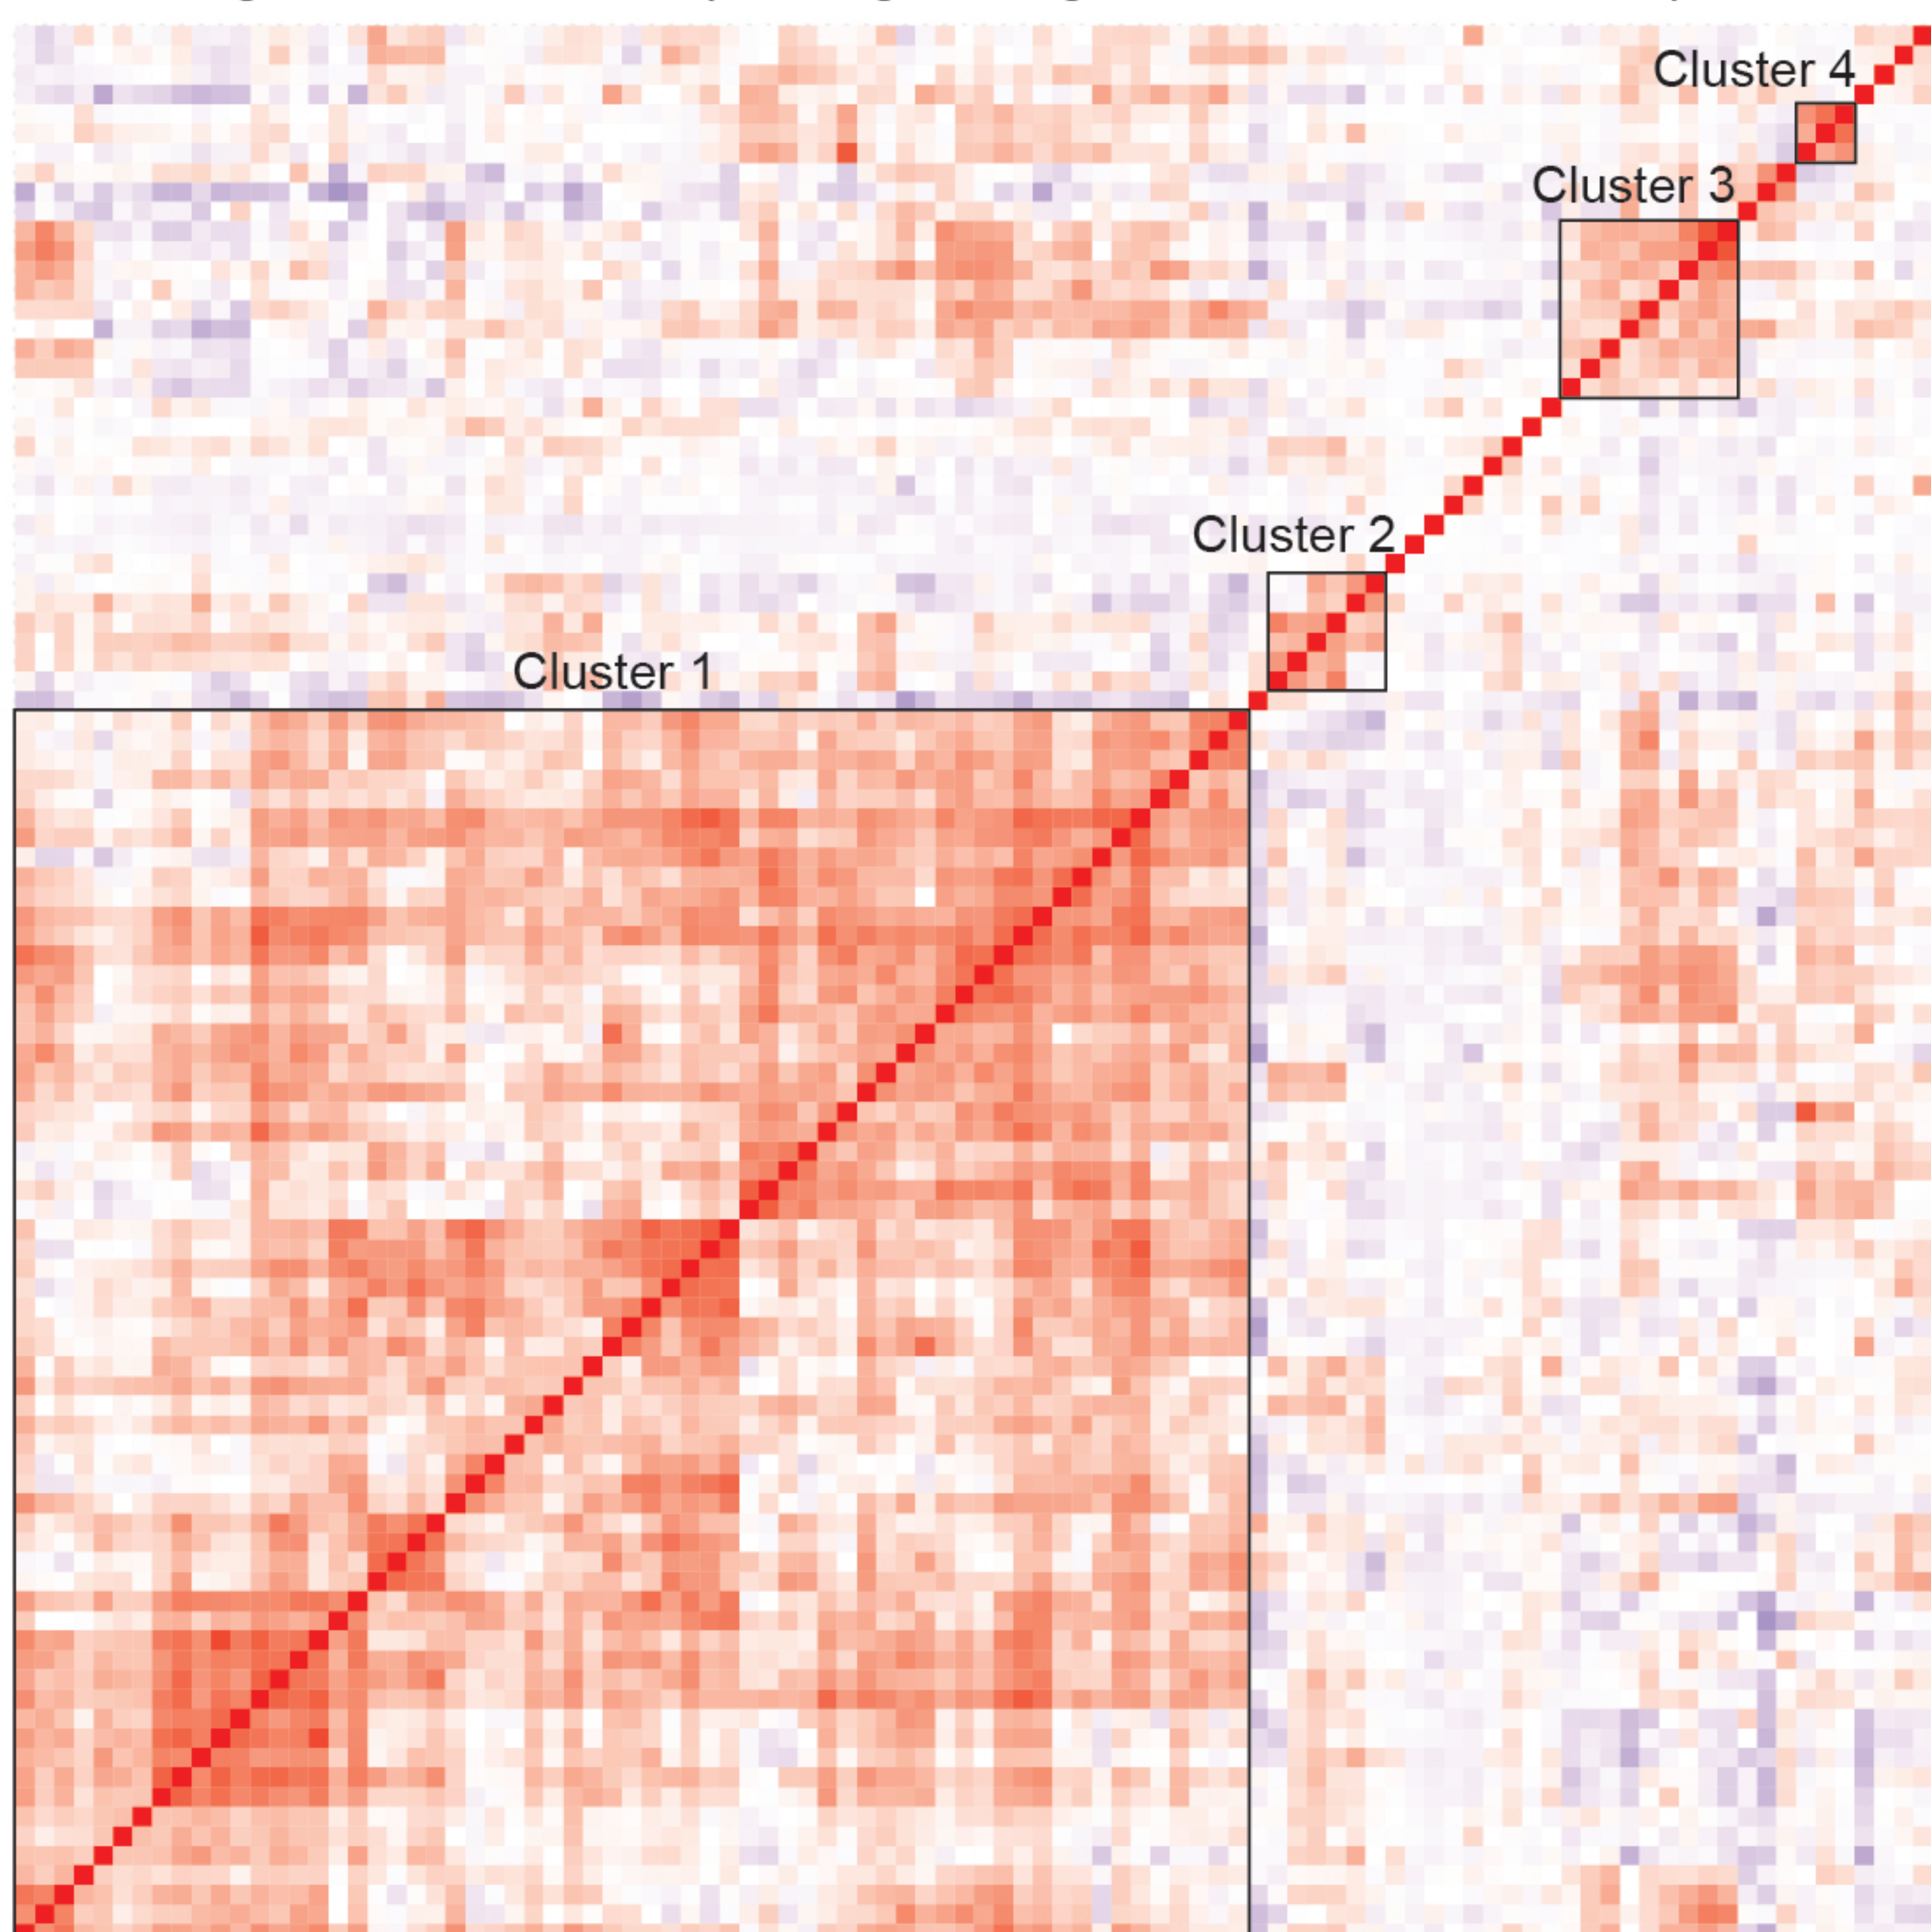

Pearson Correlation  
1 0 -1

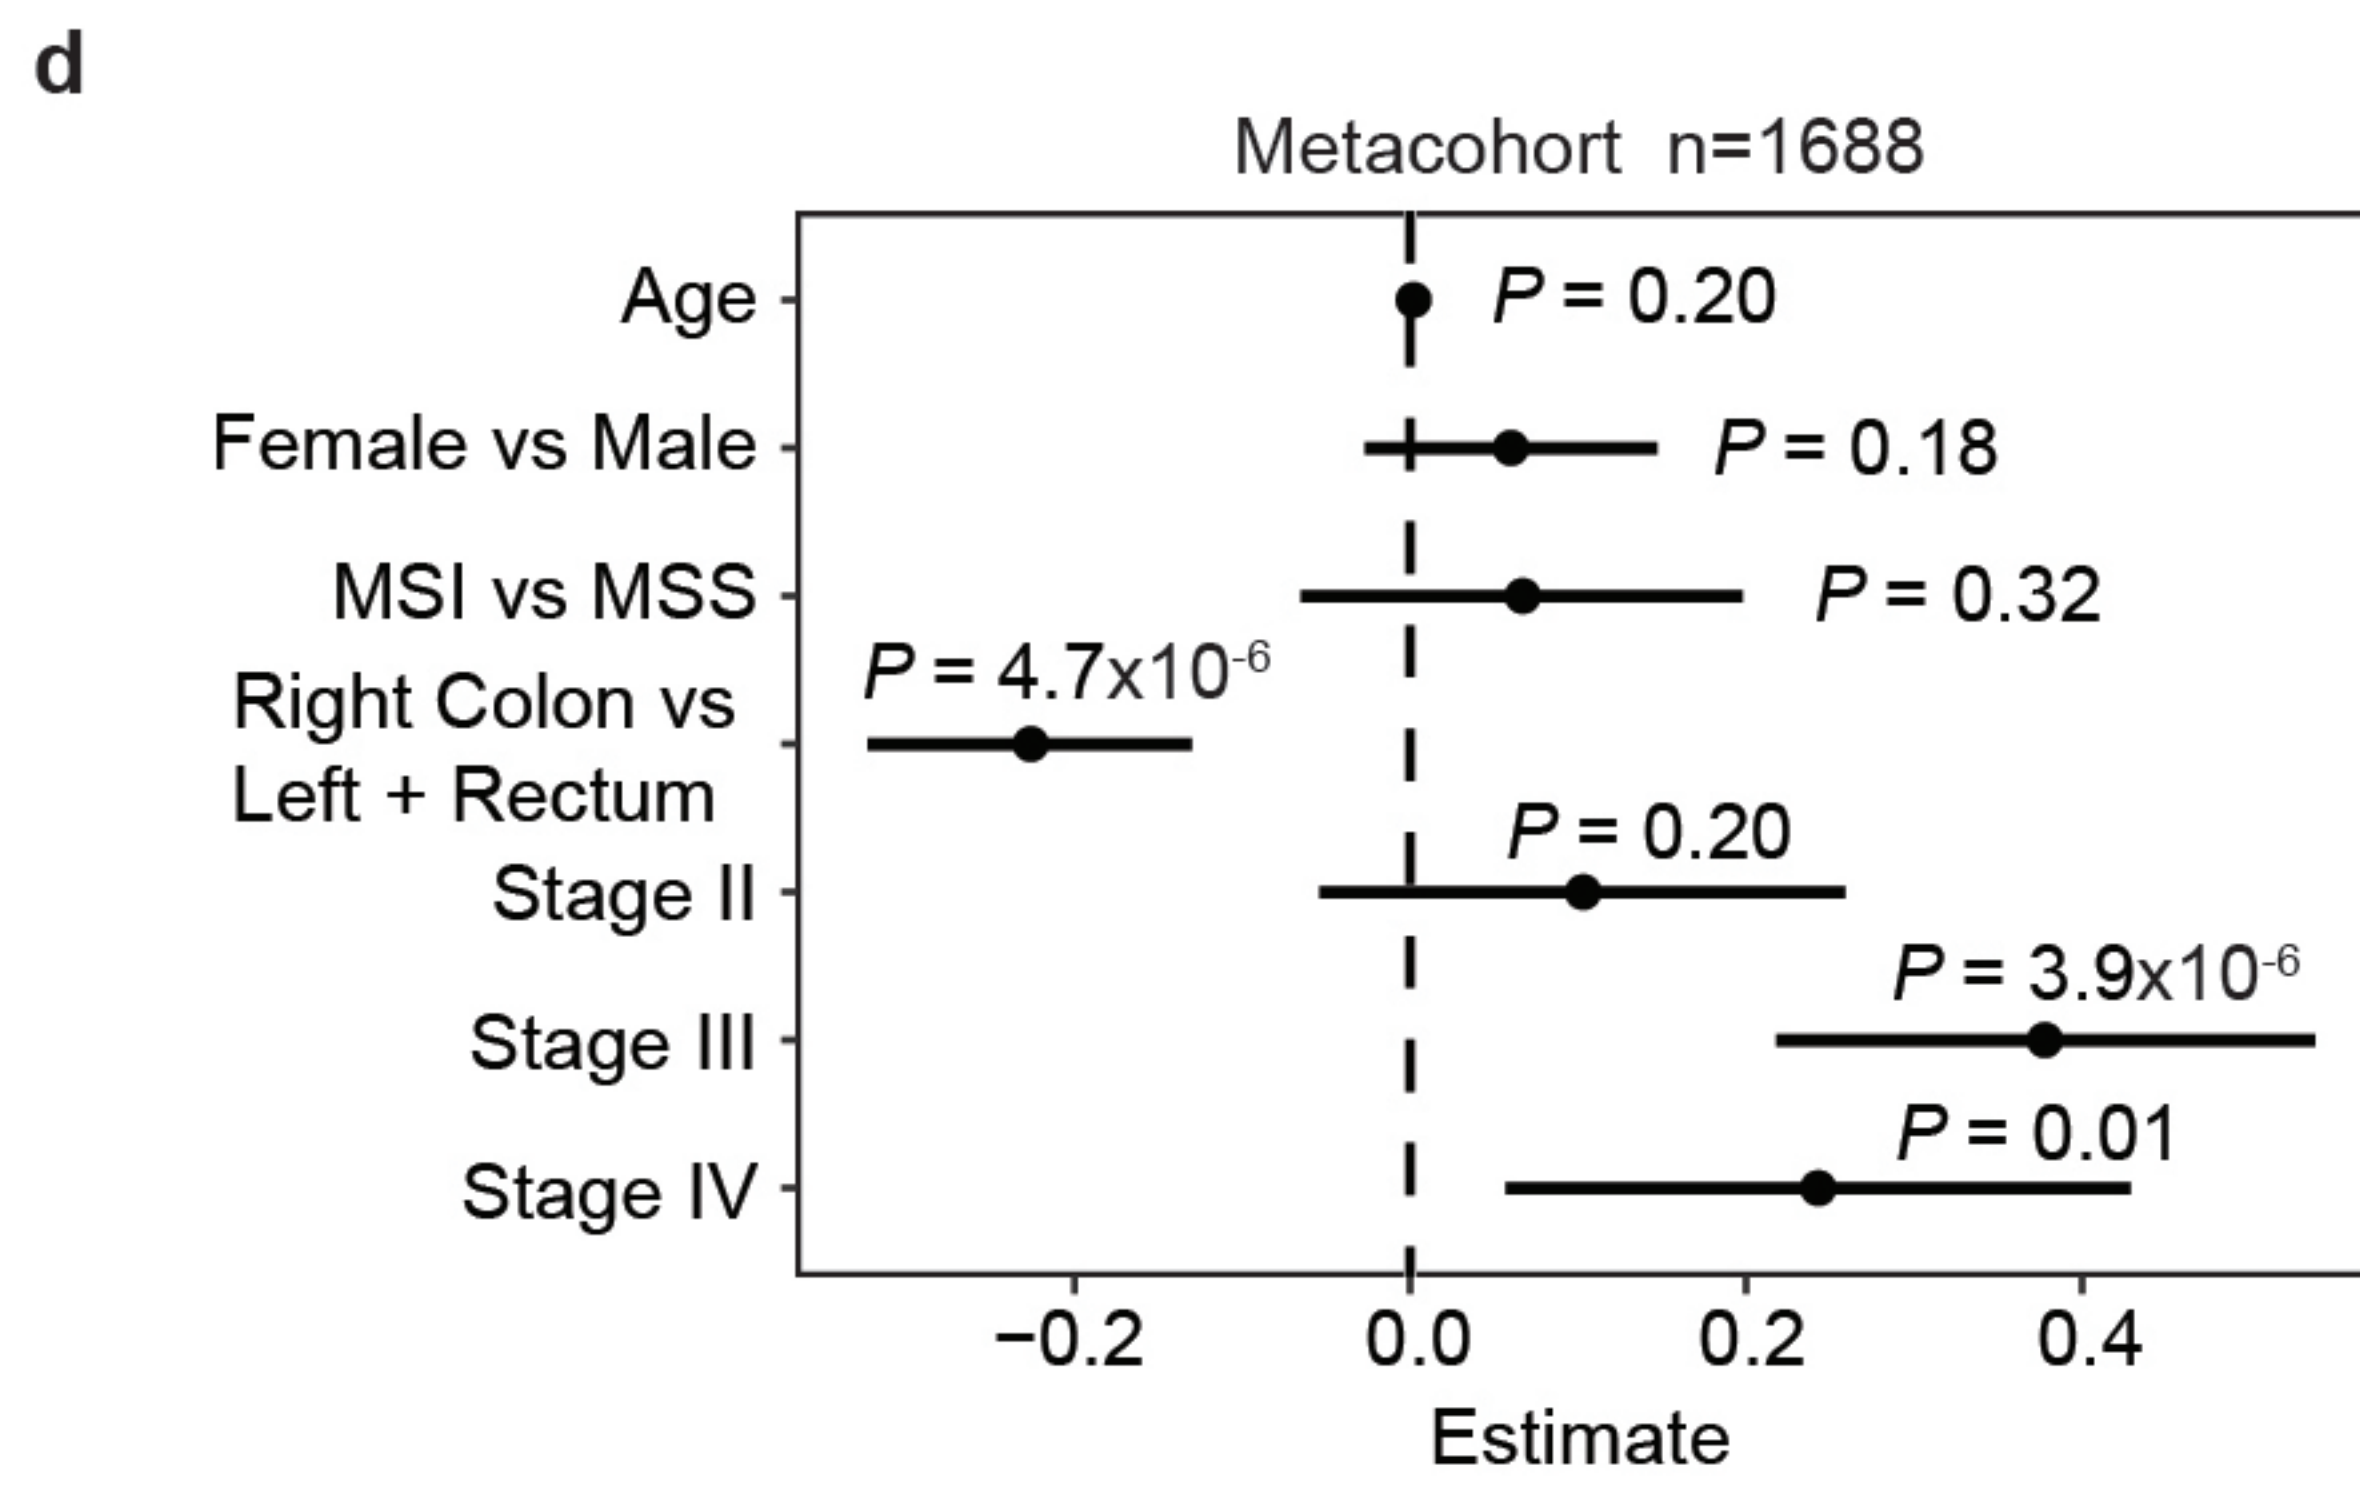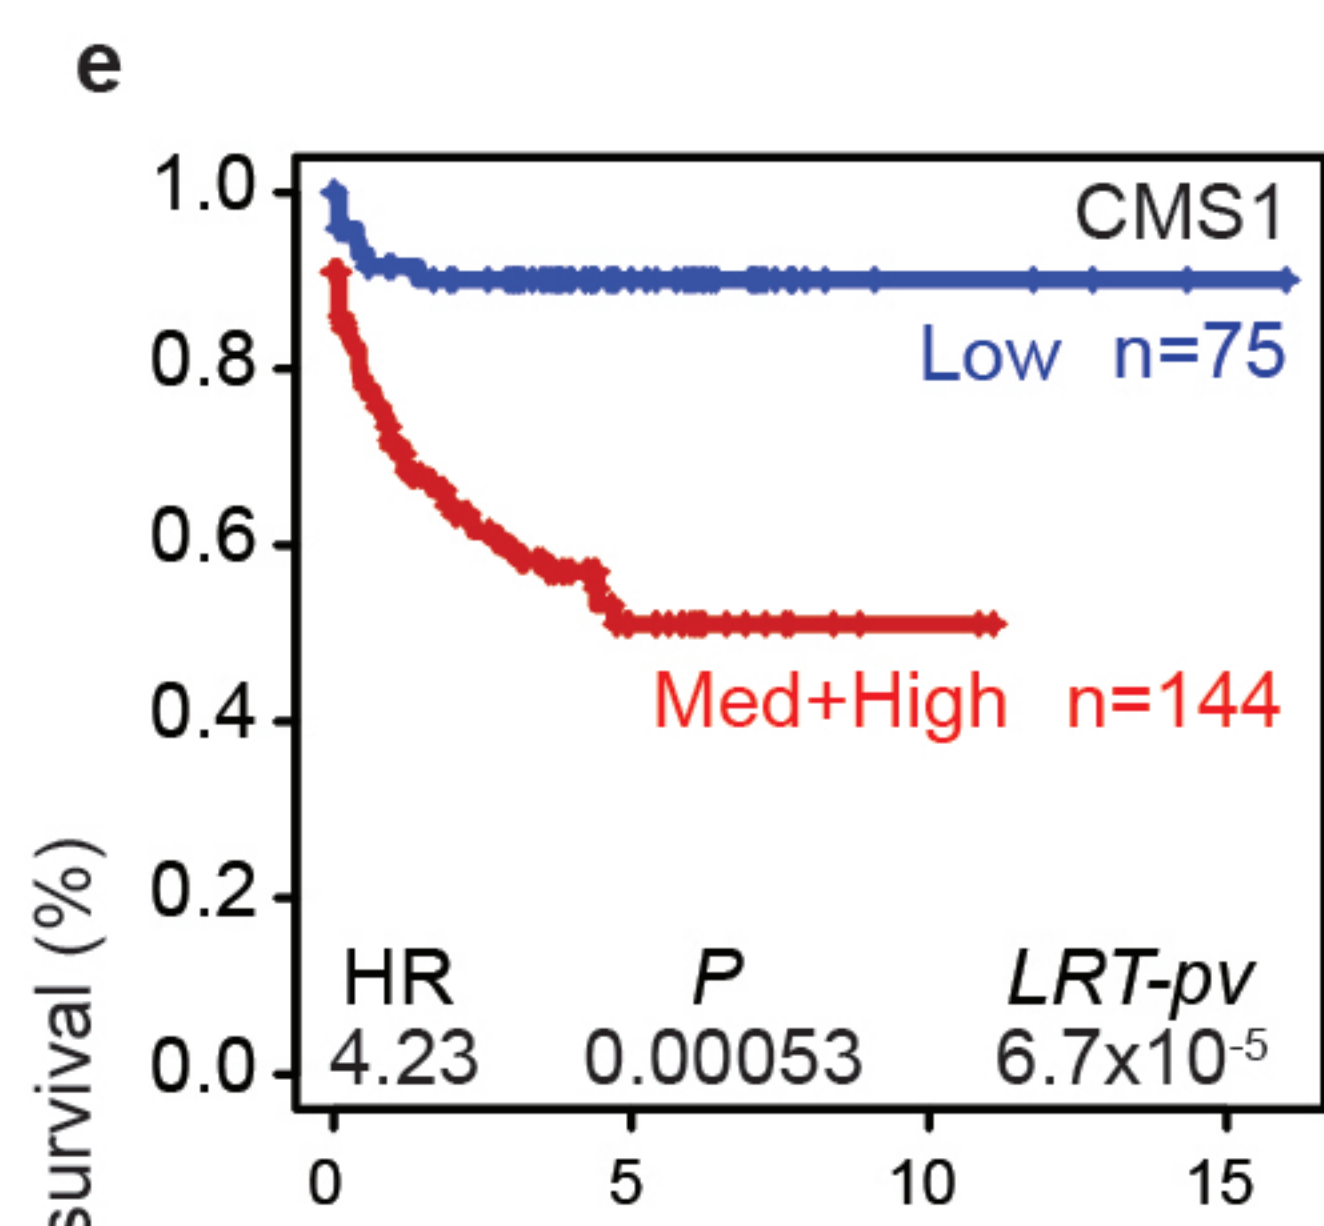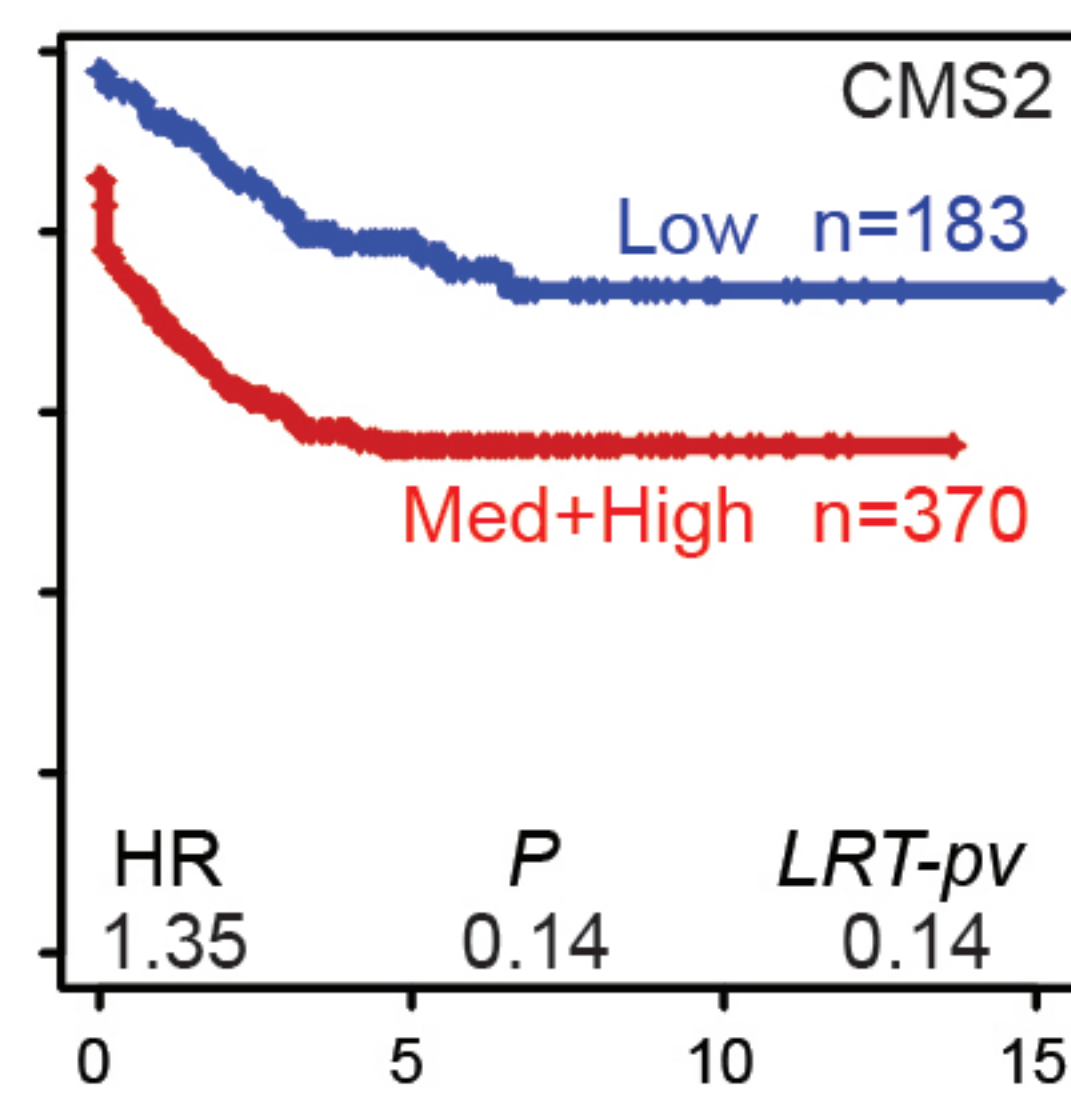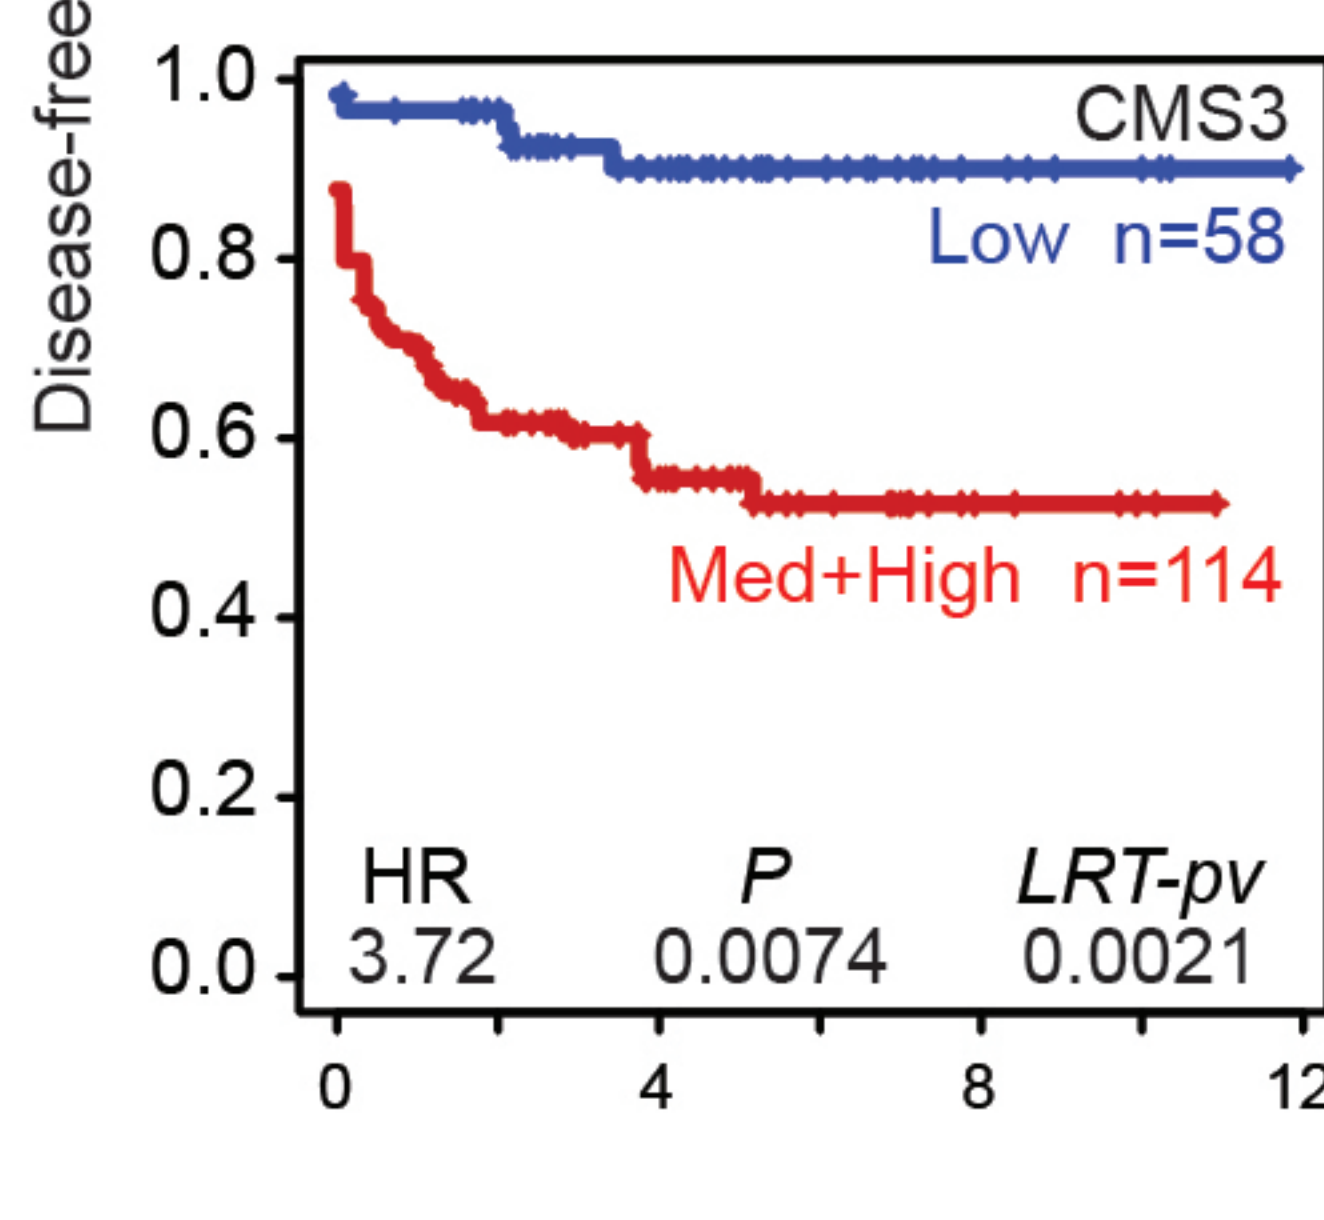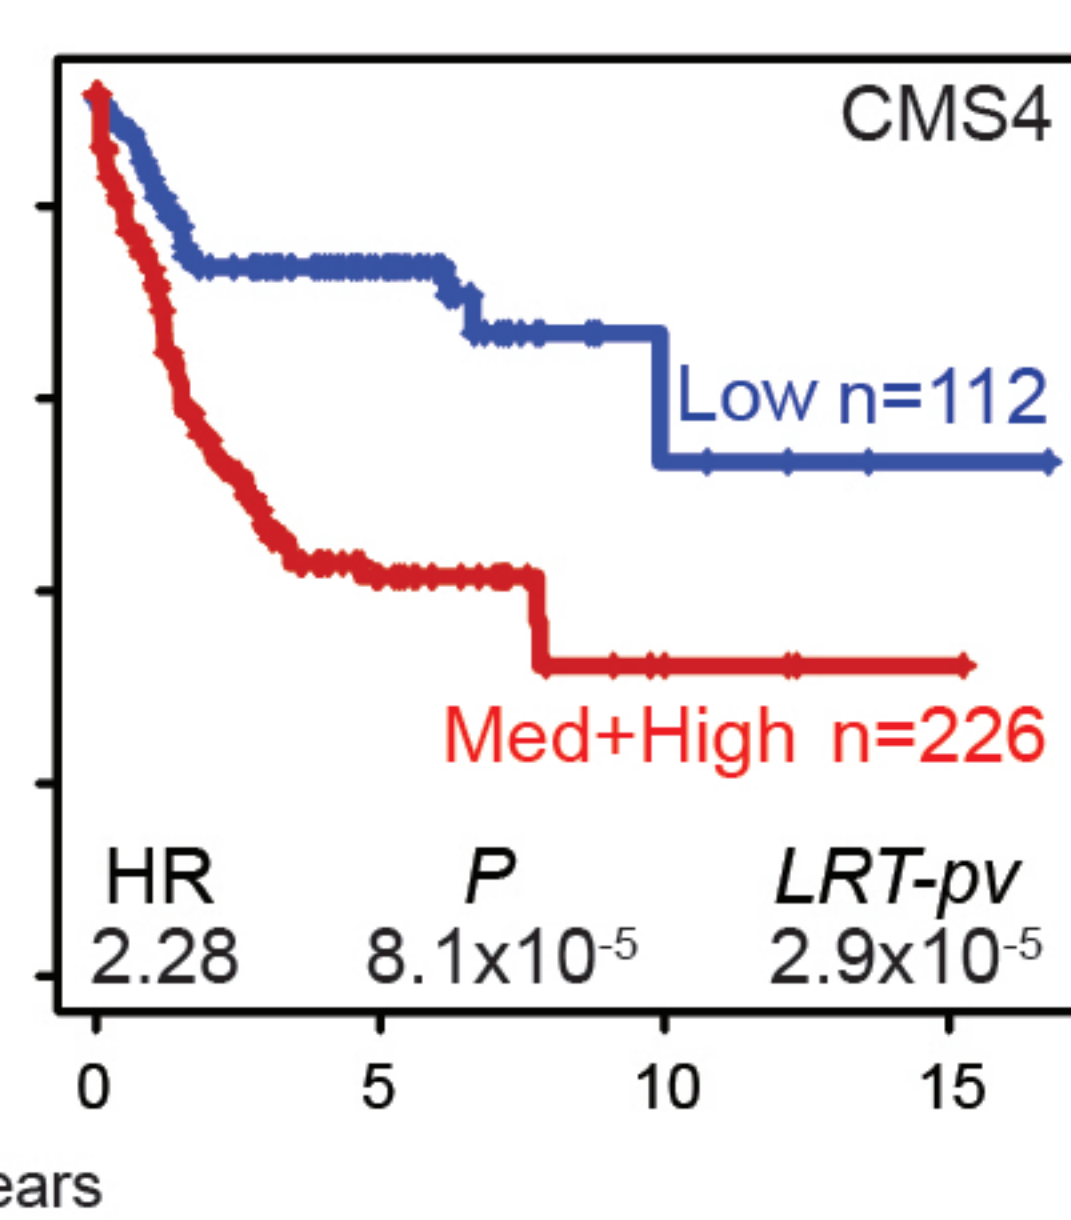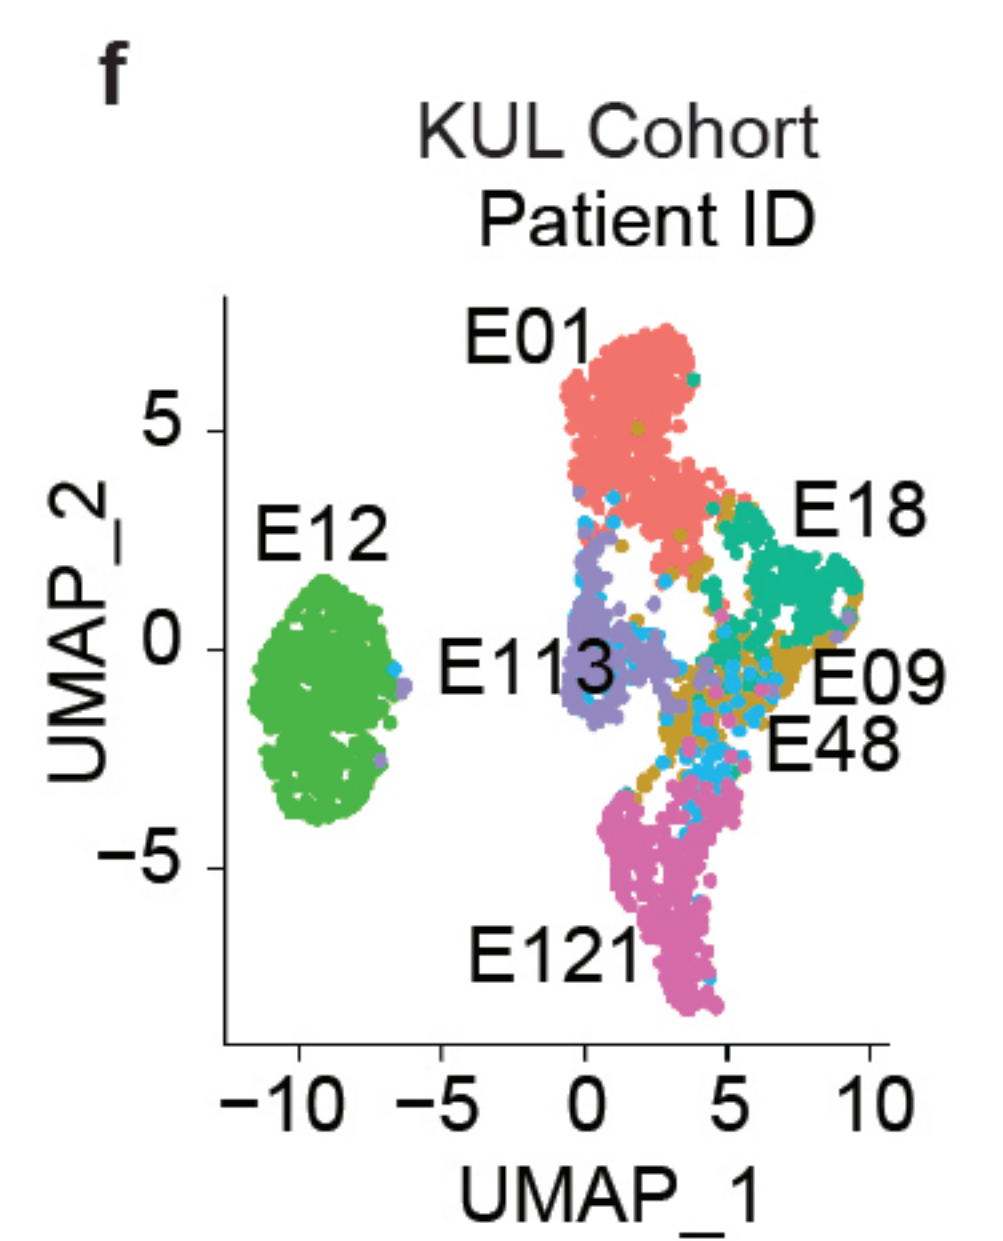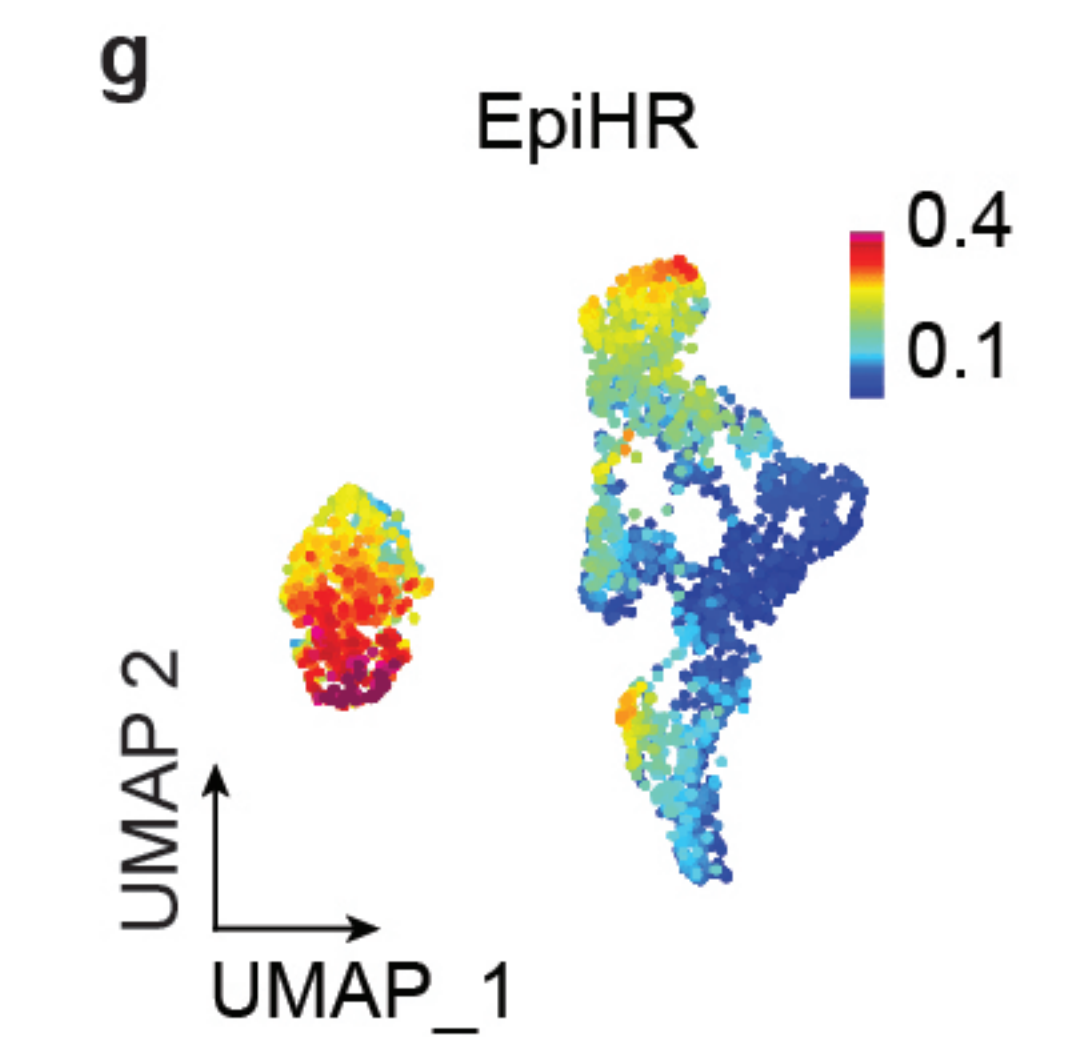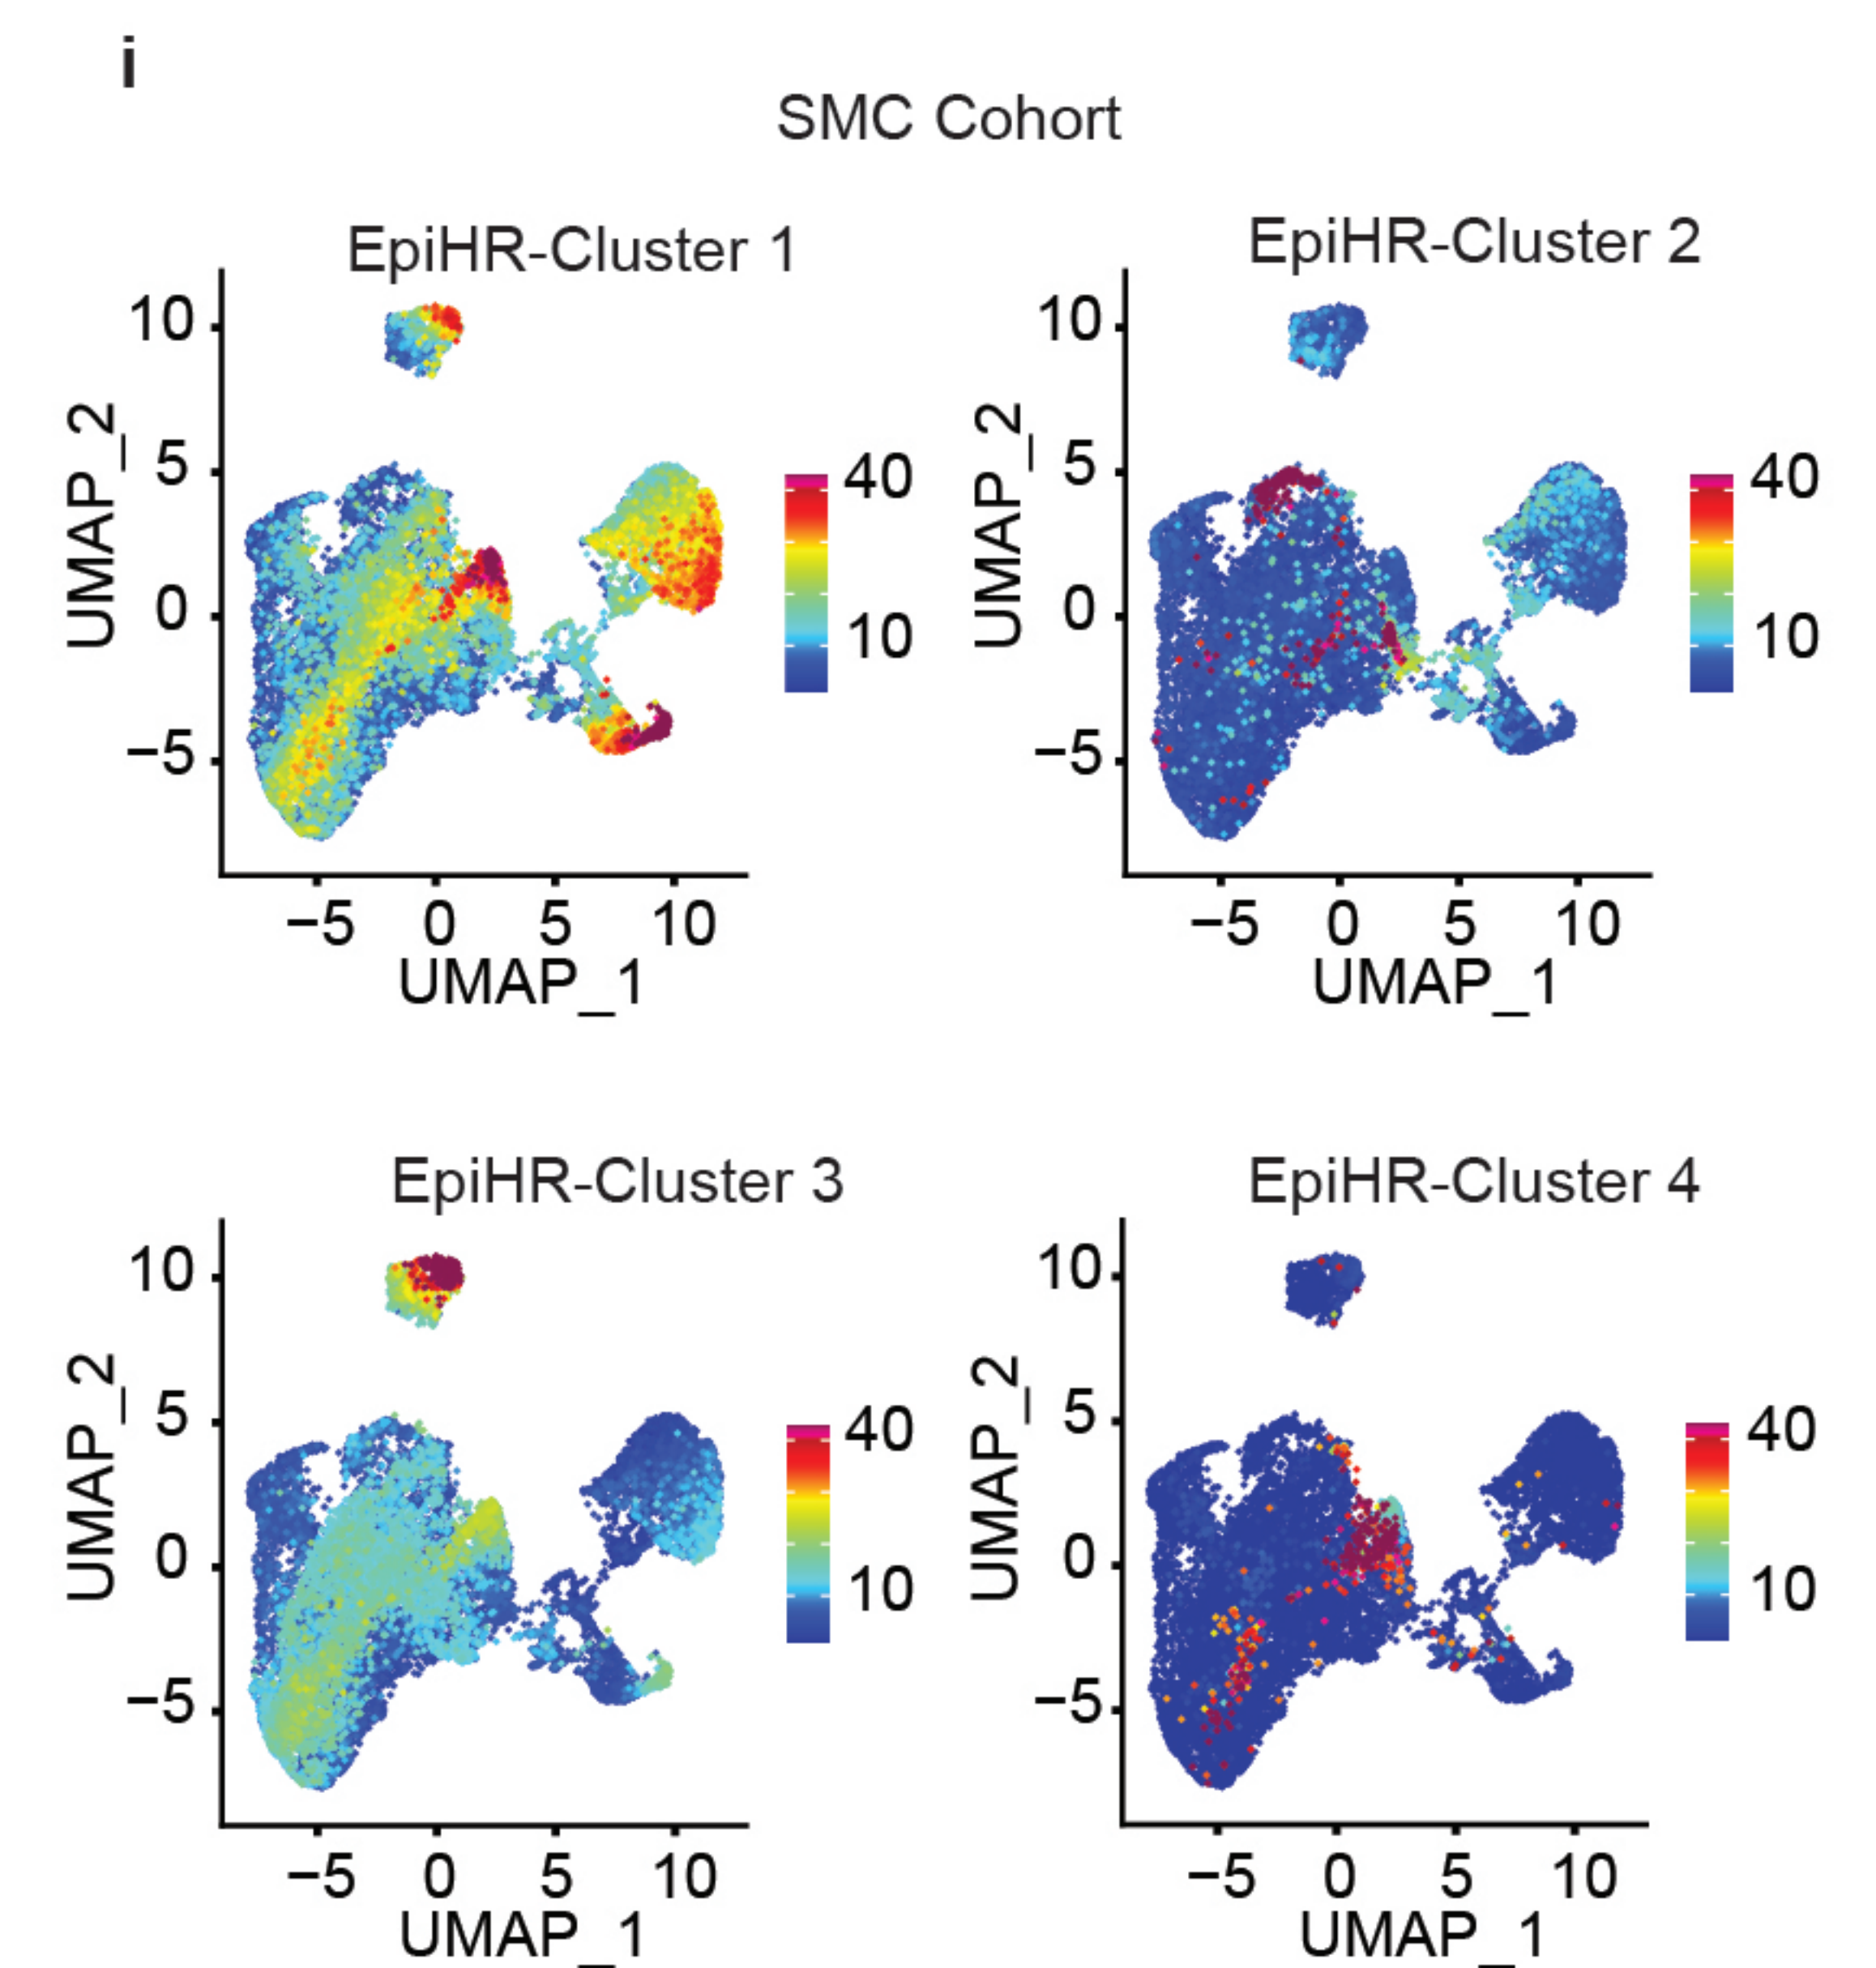



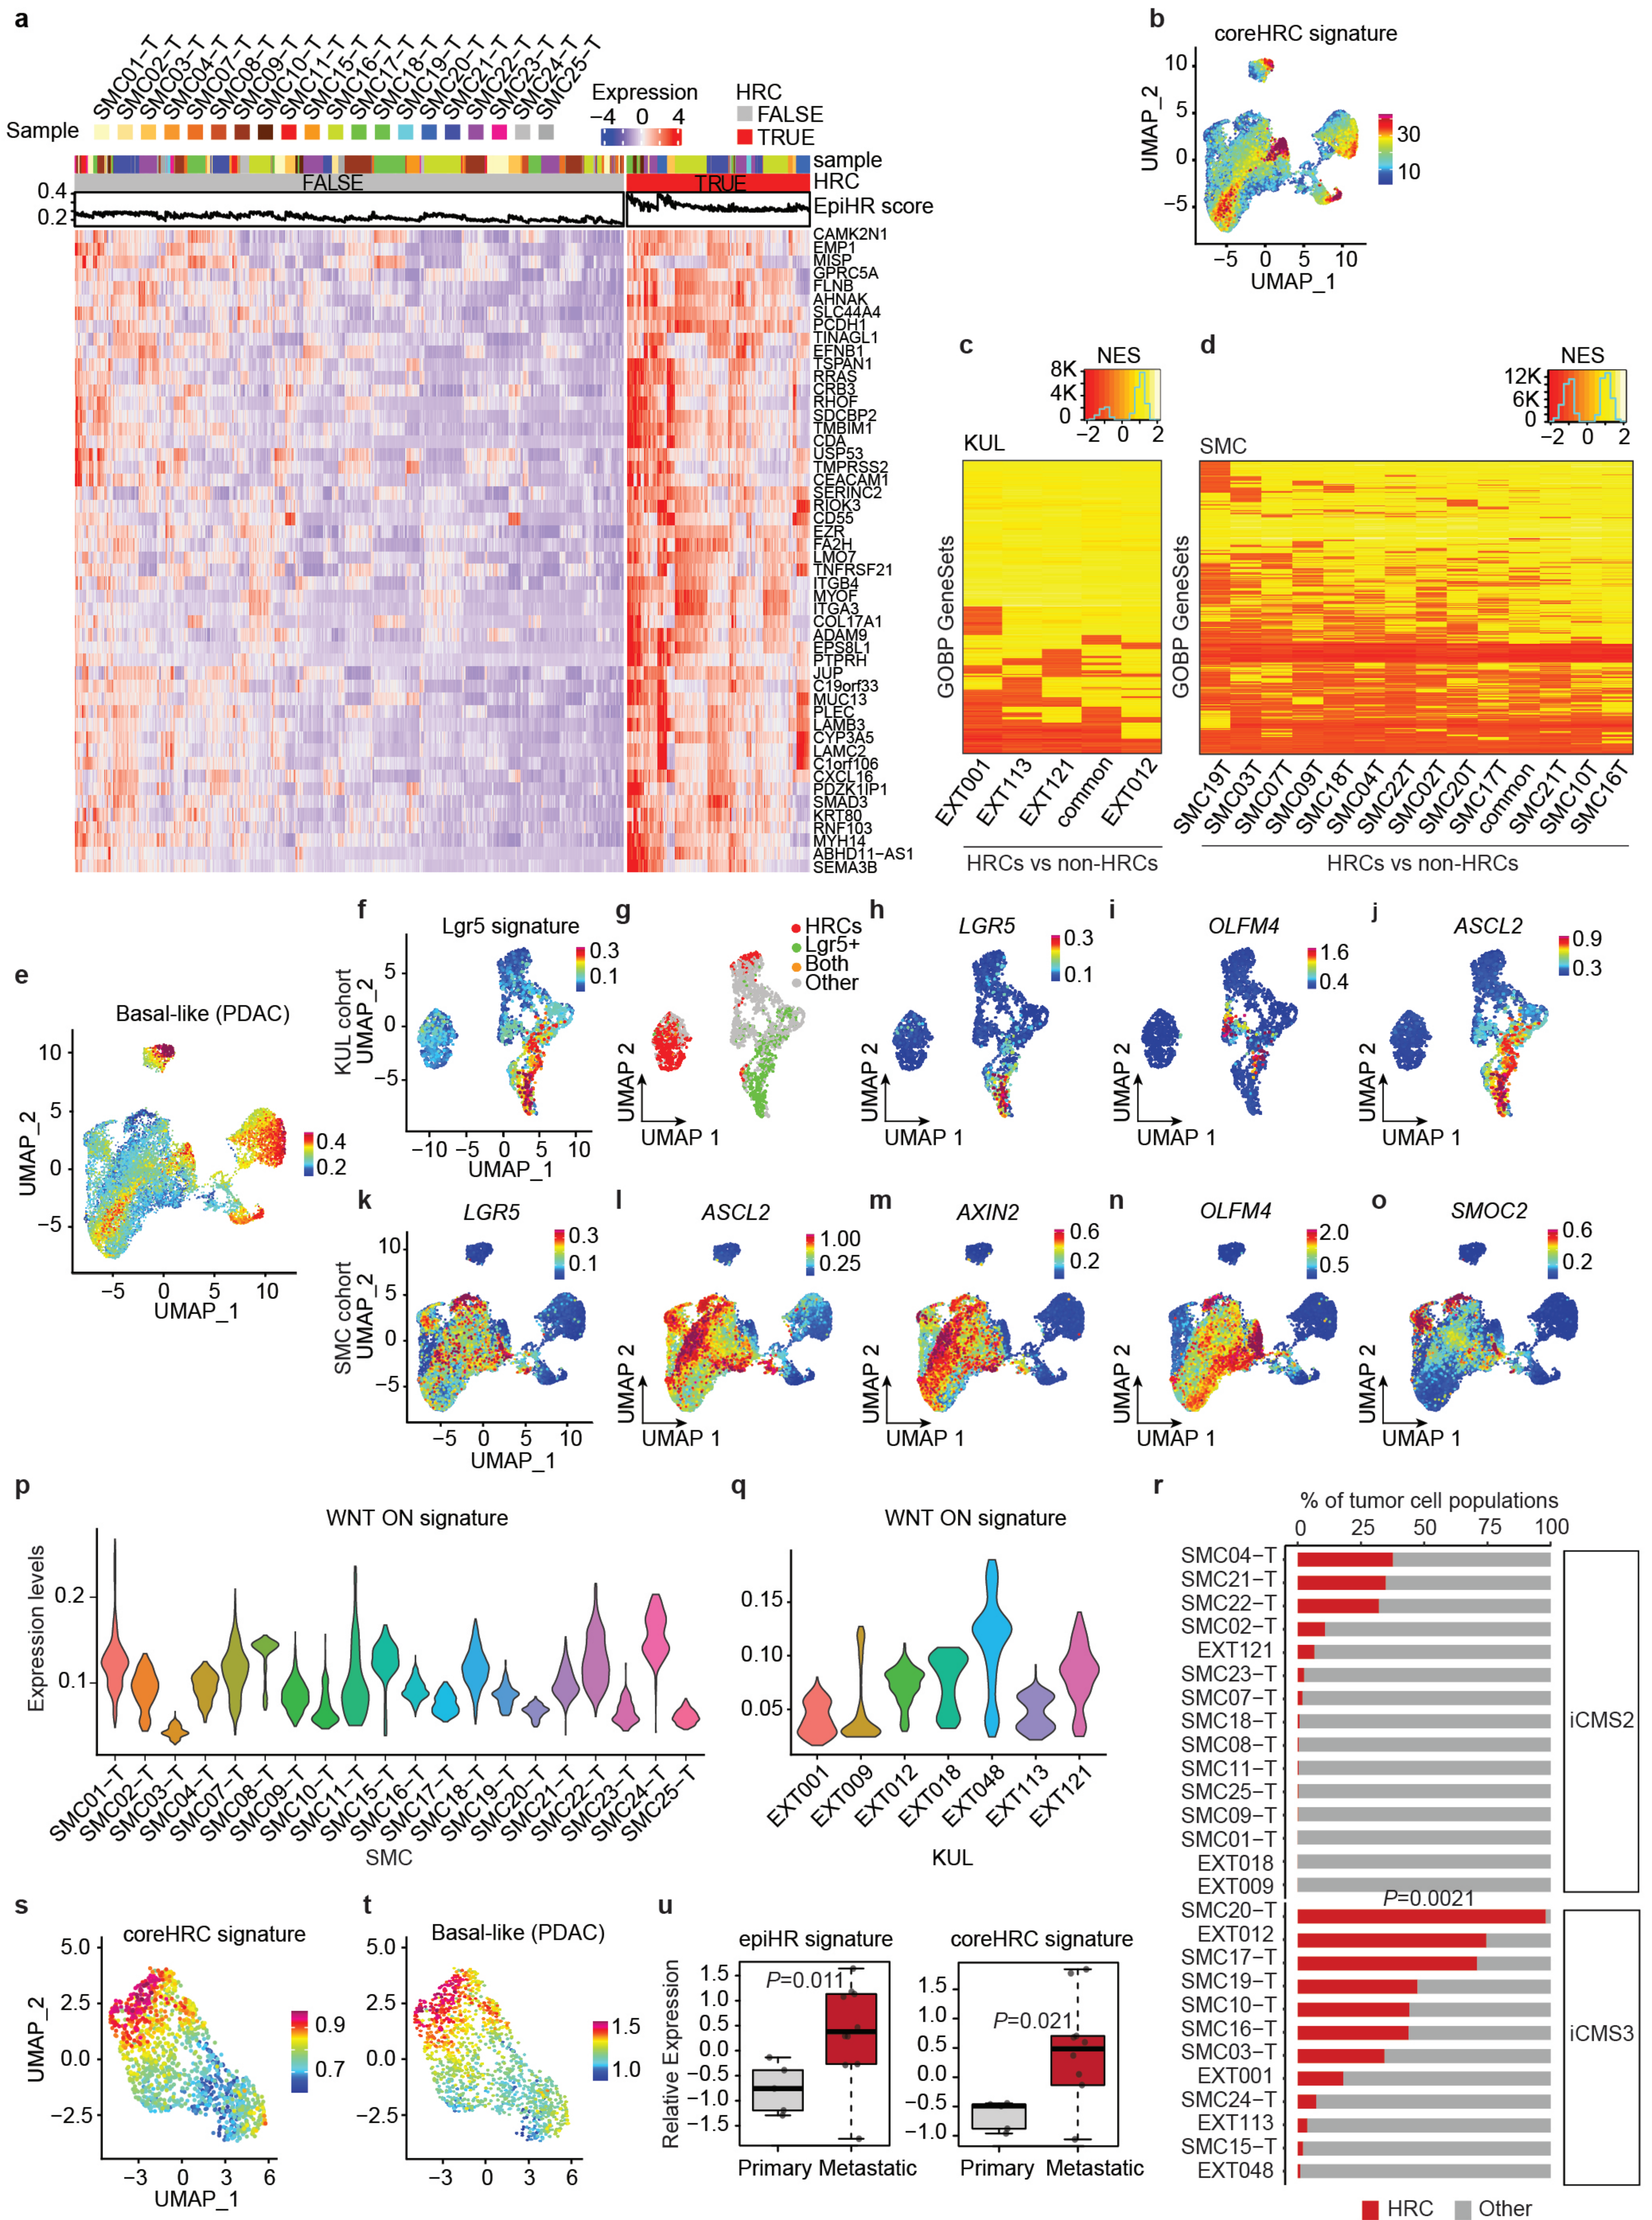

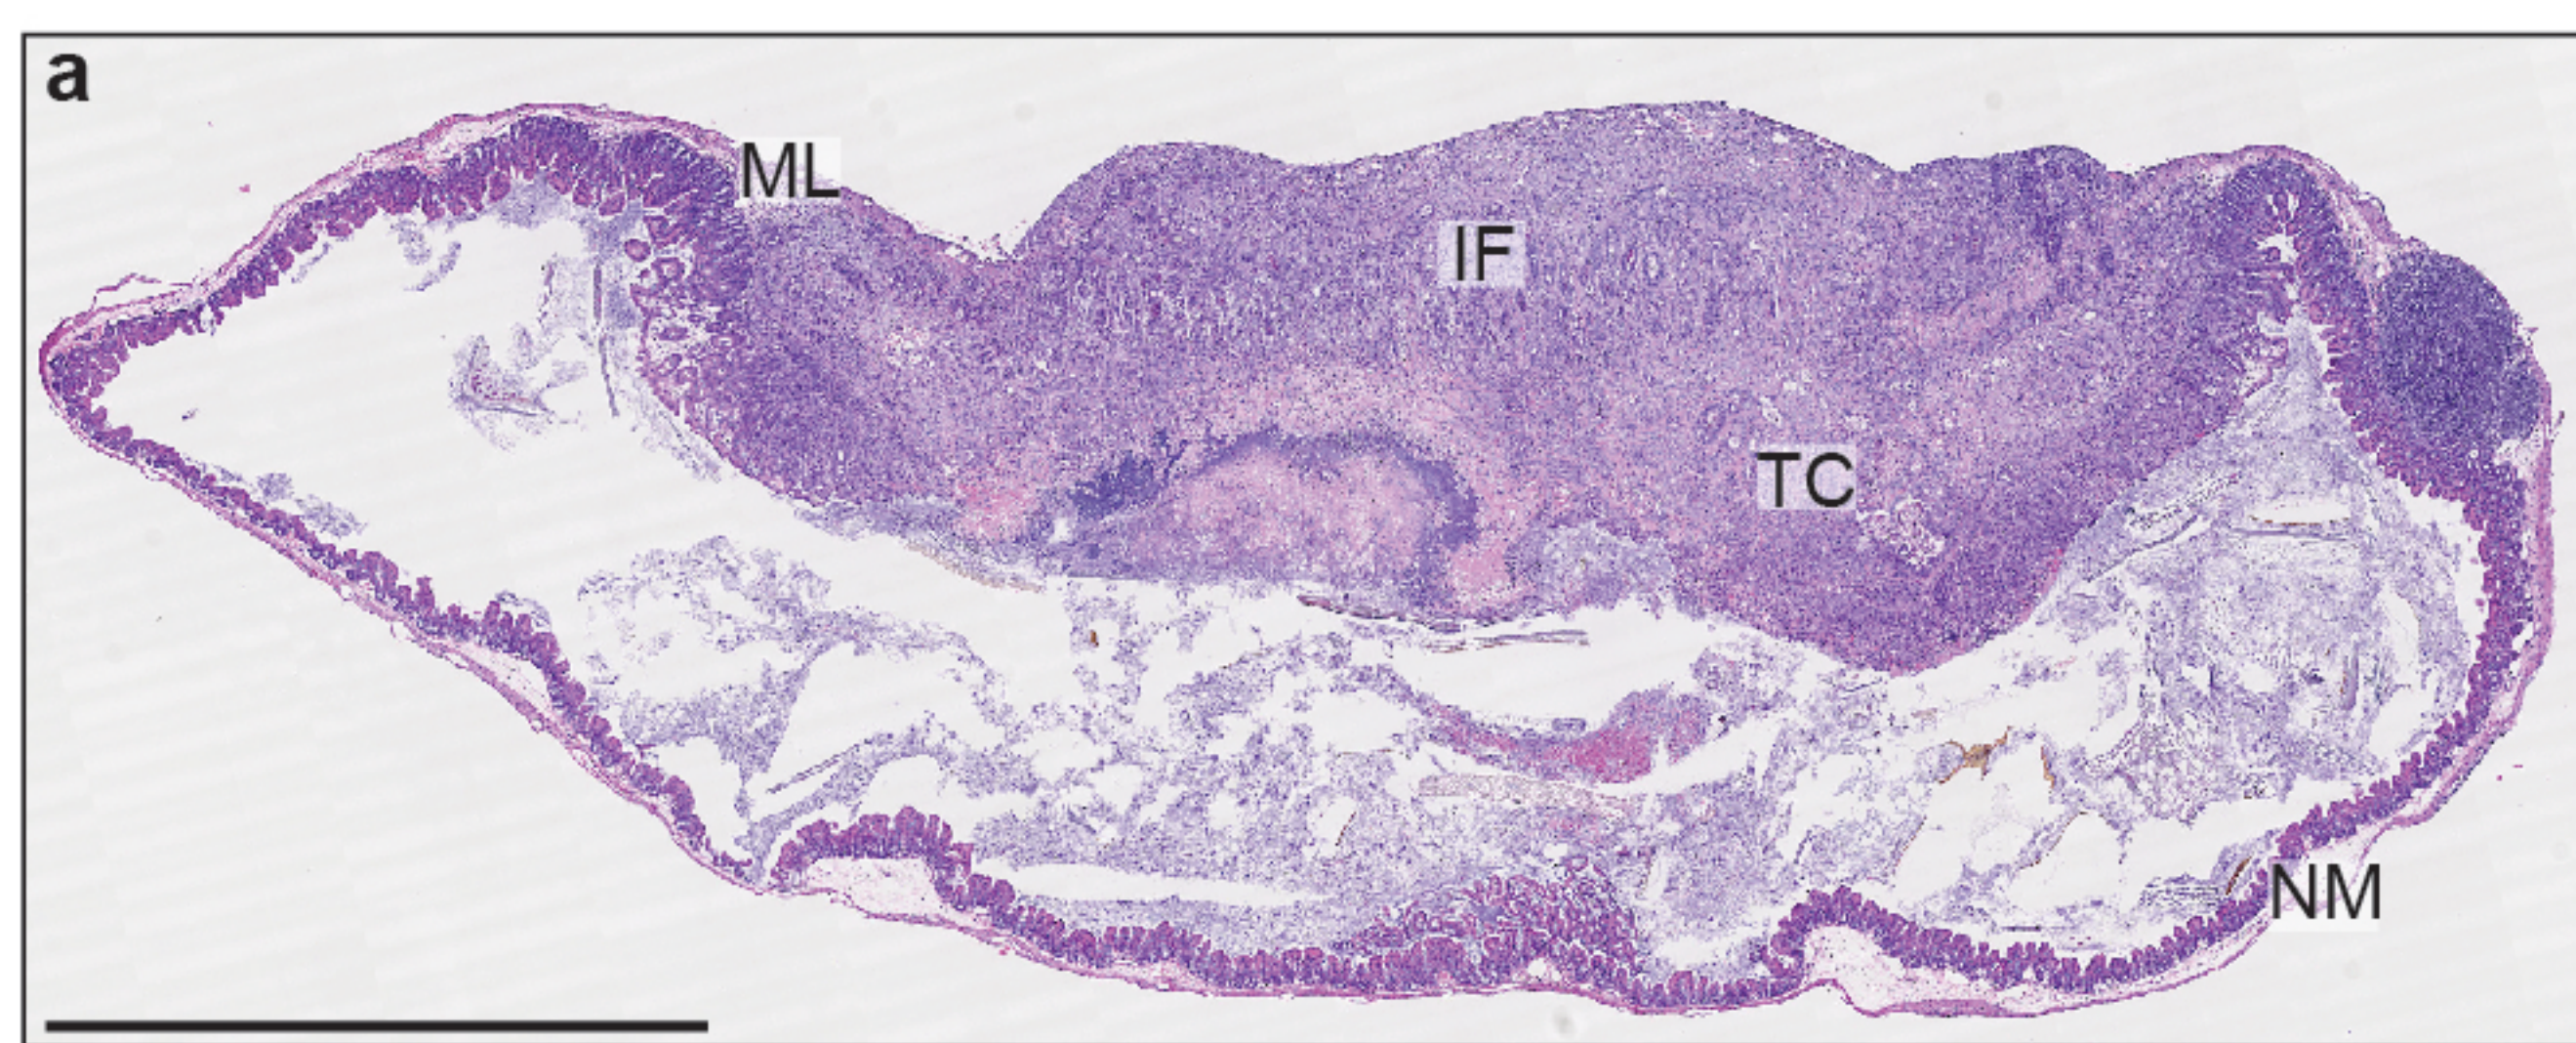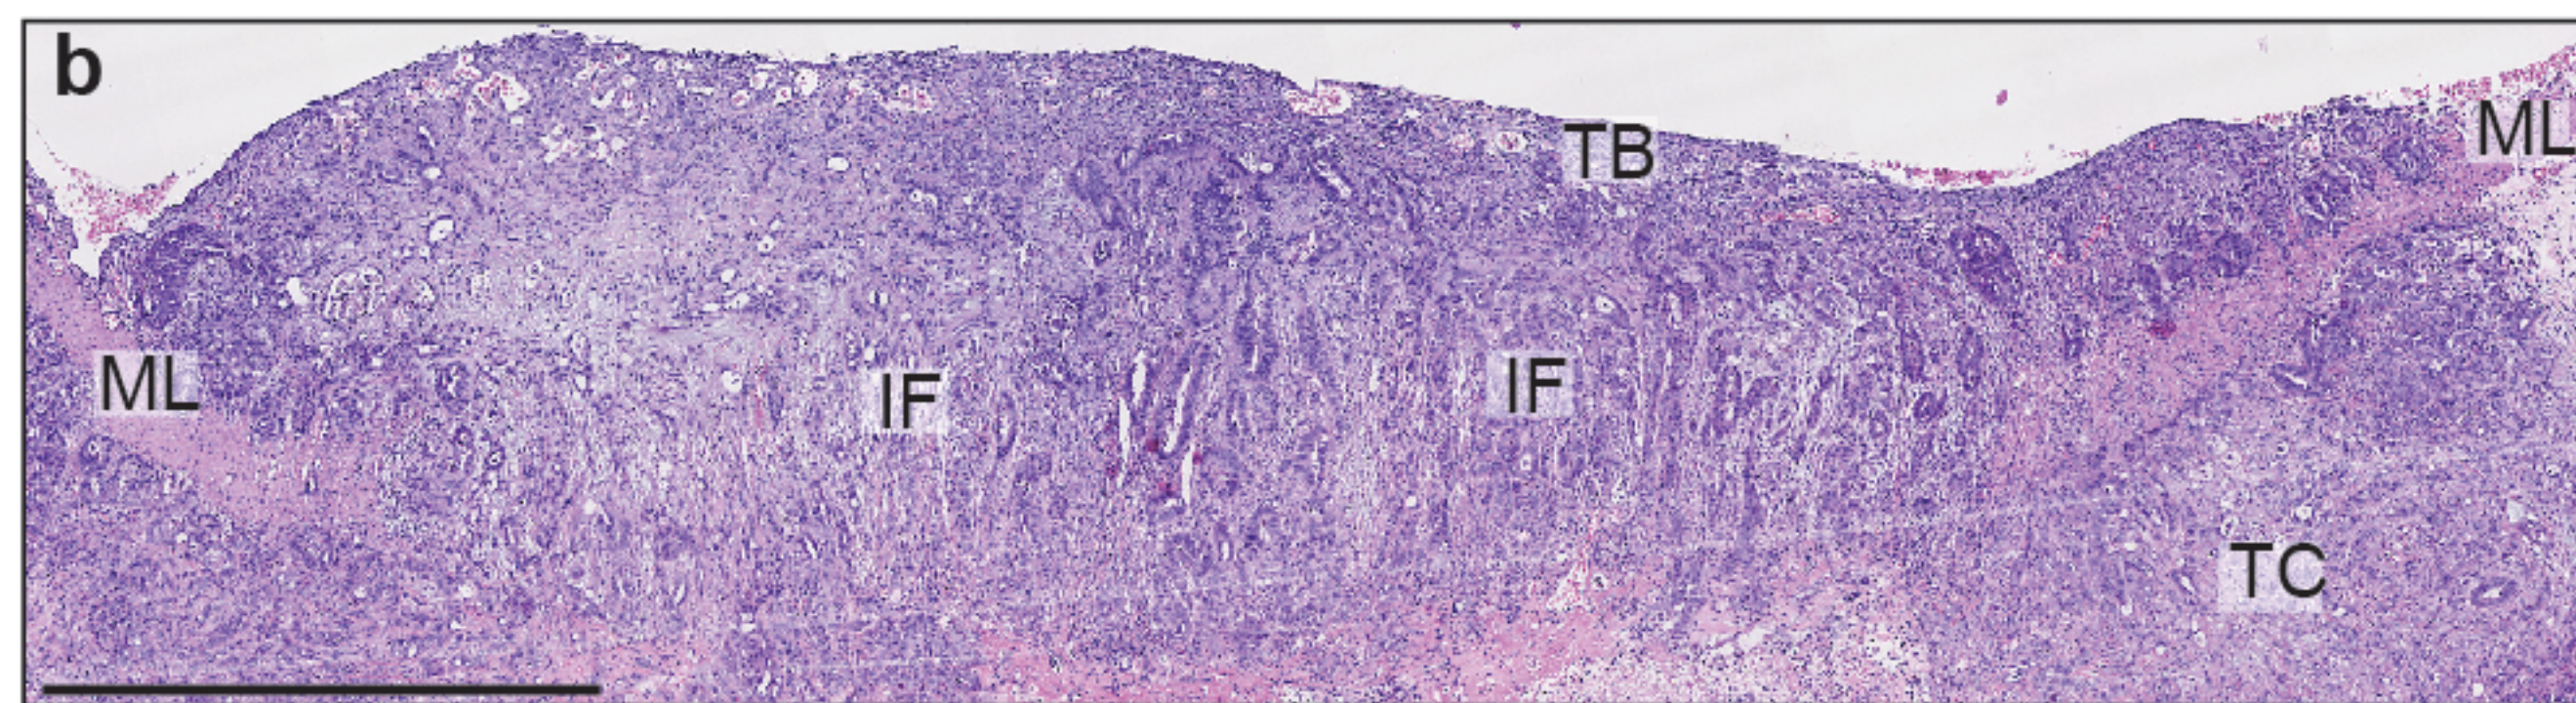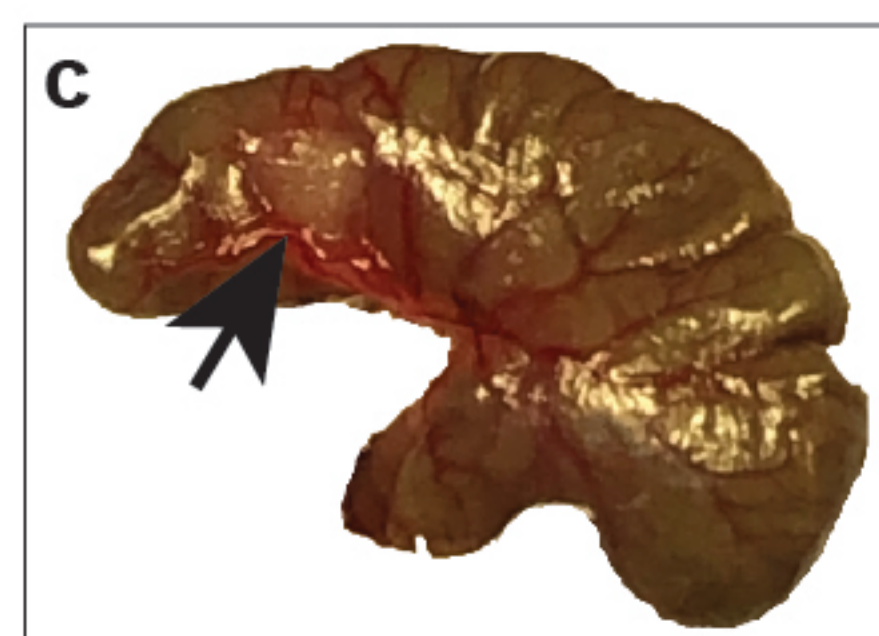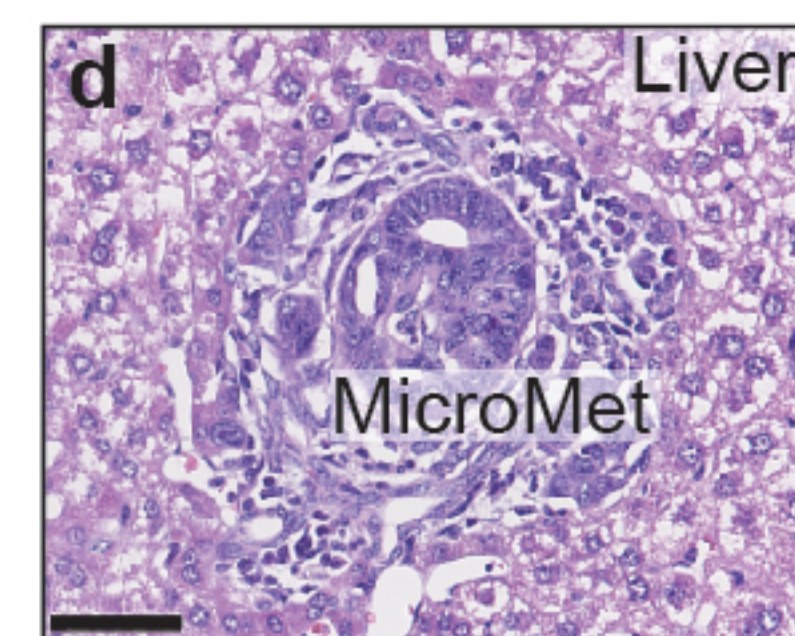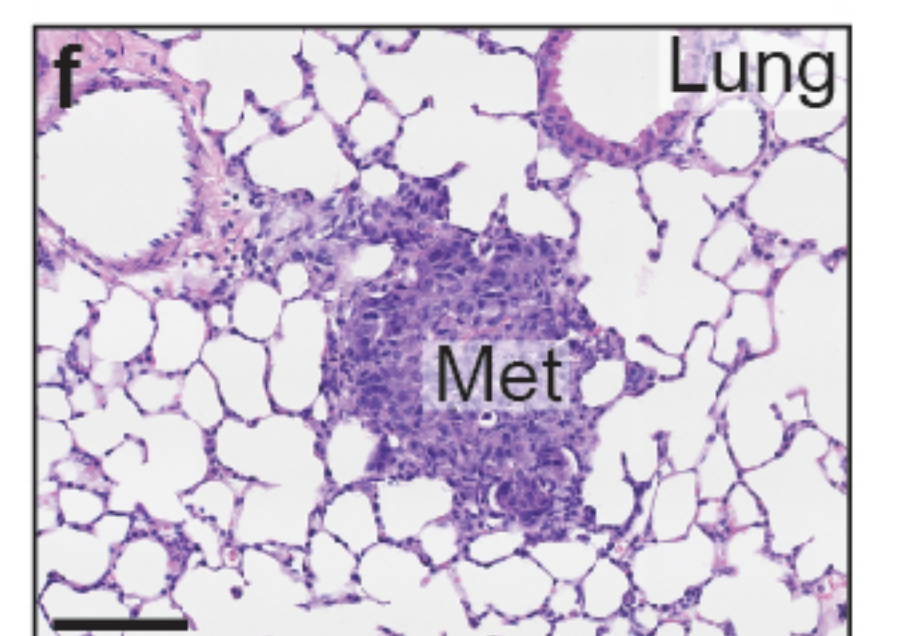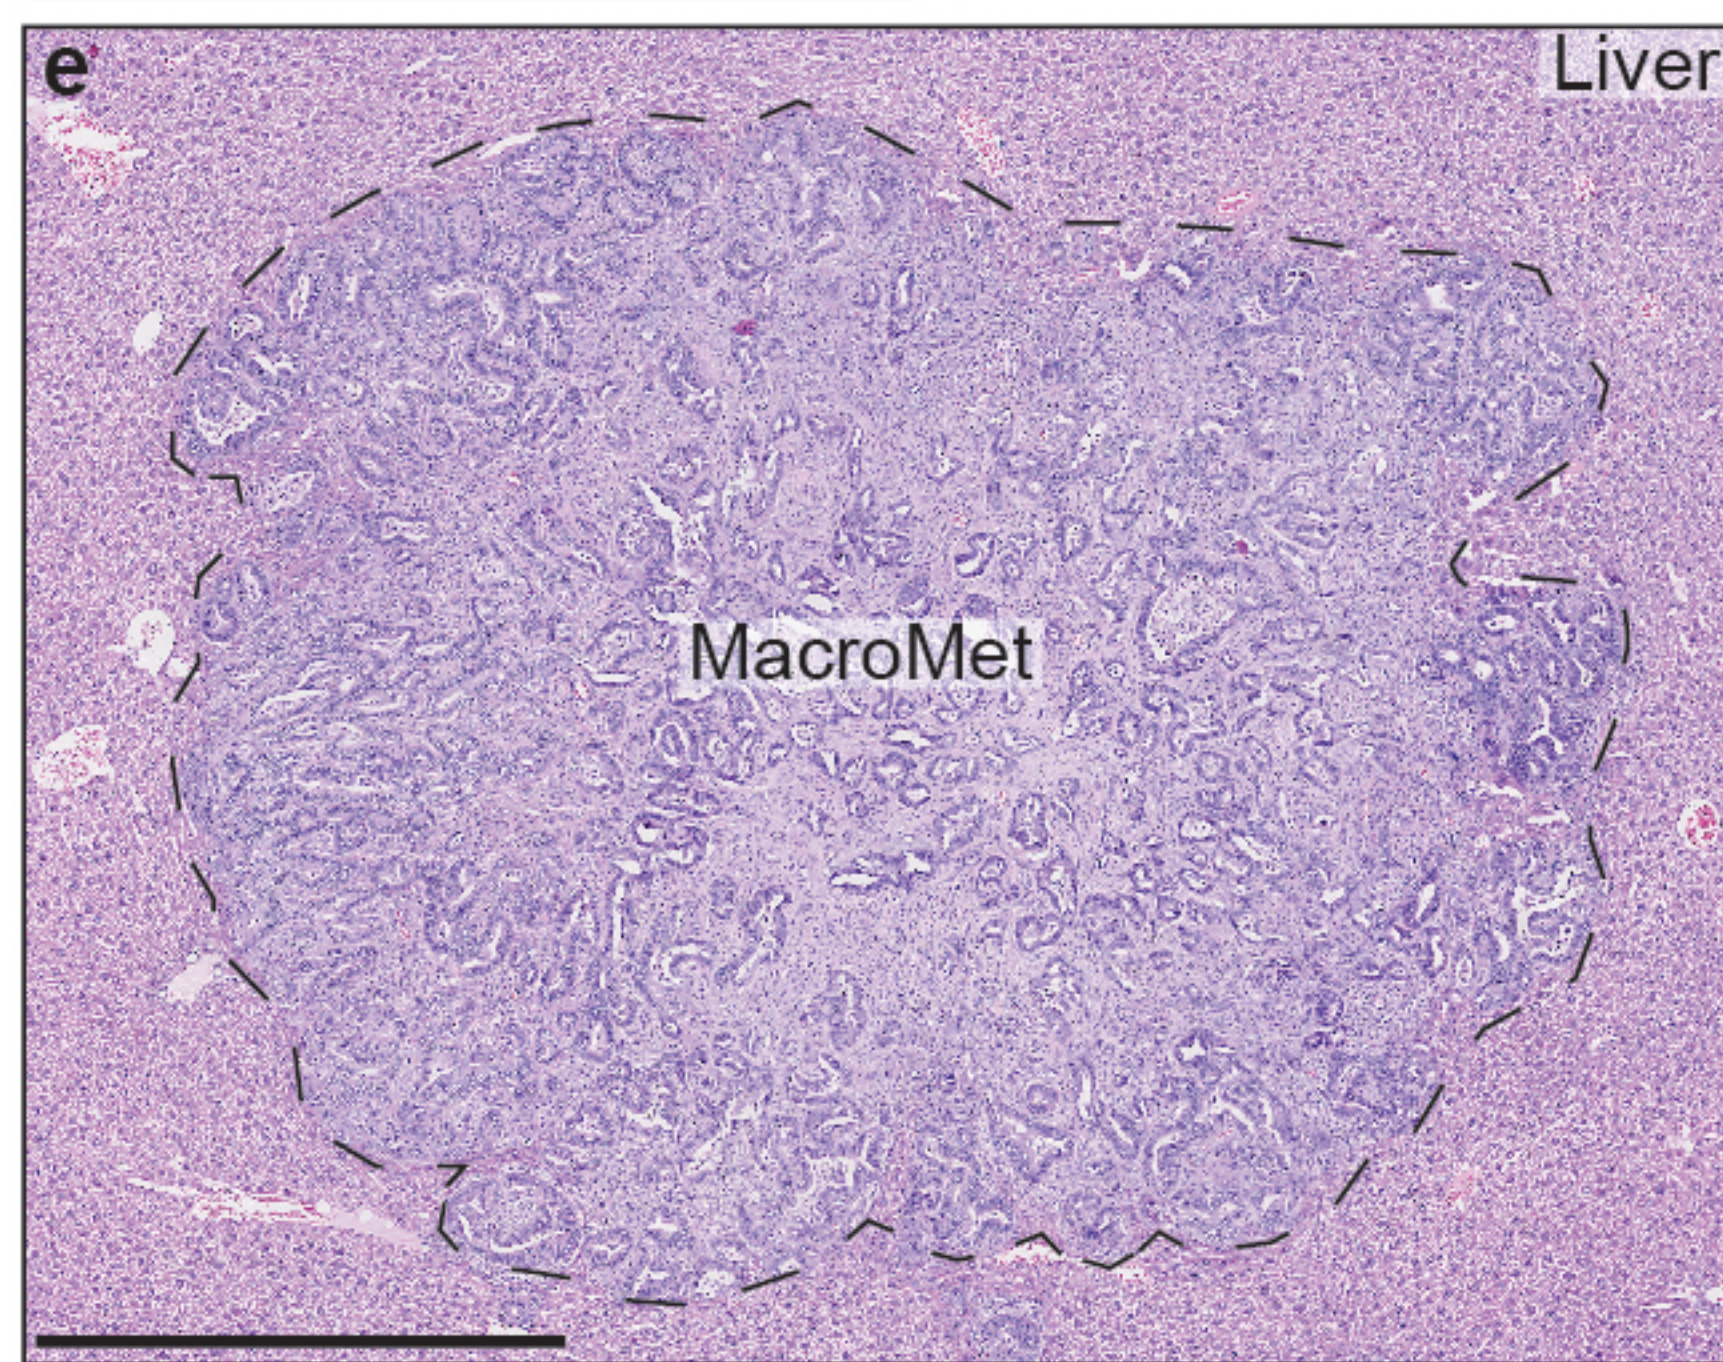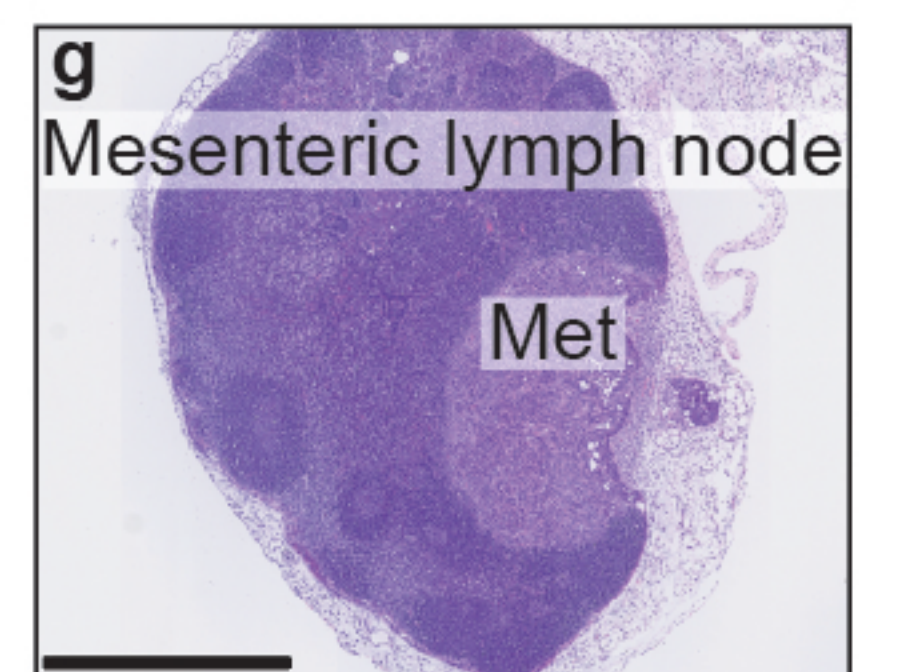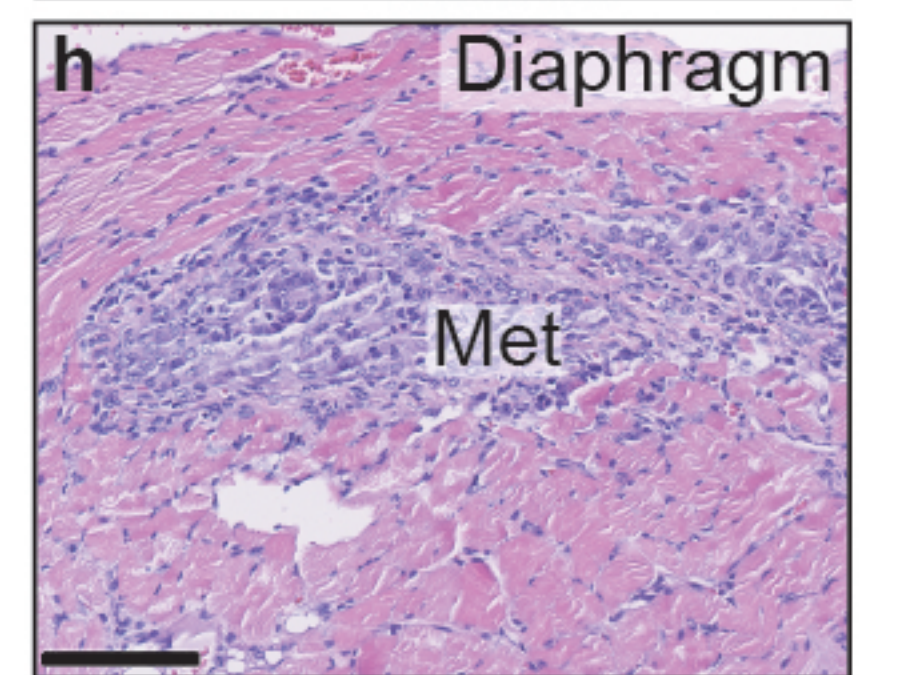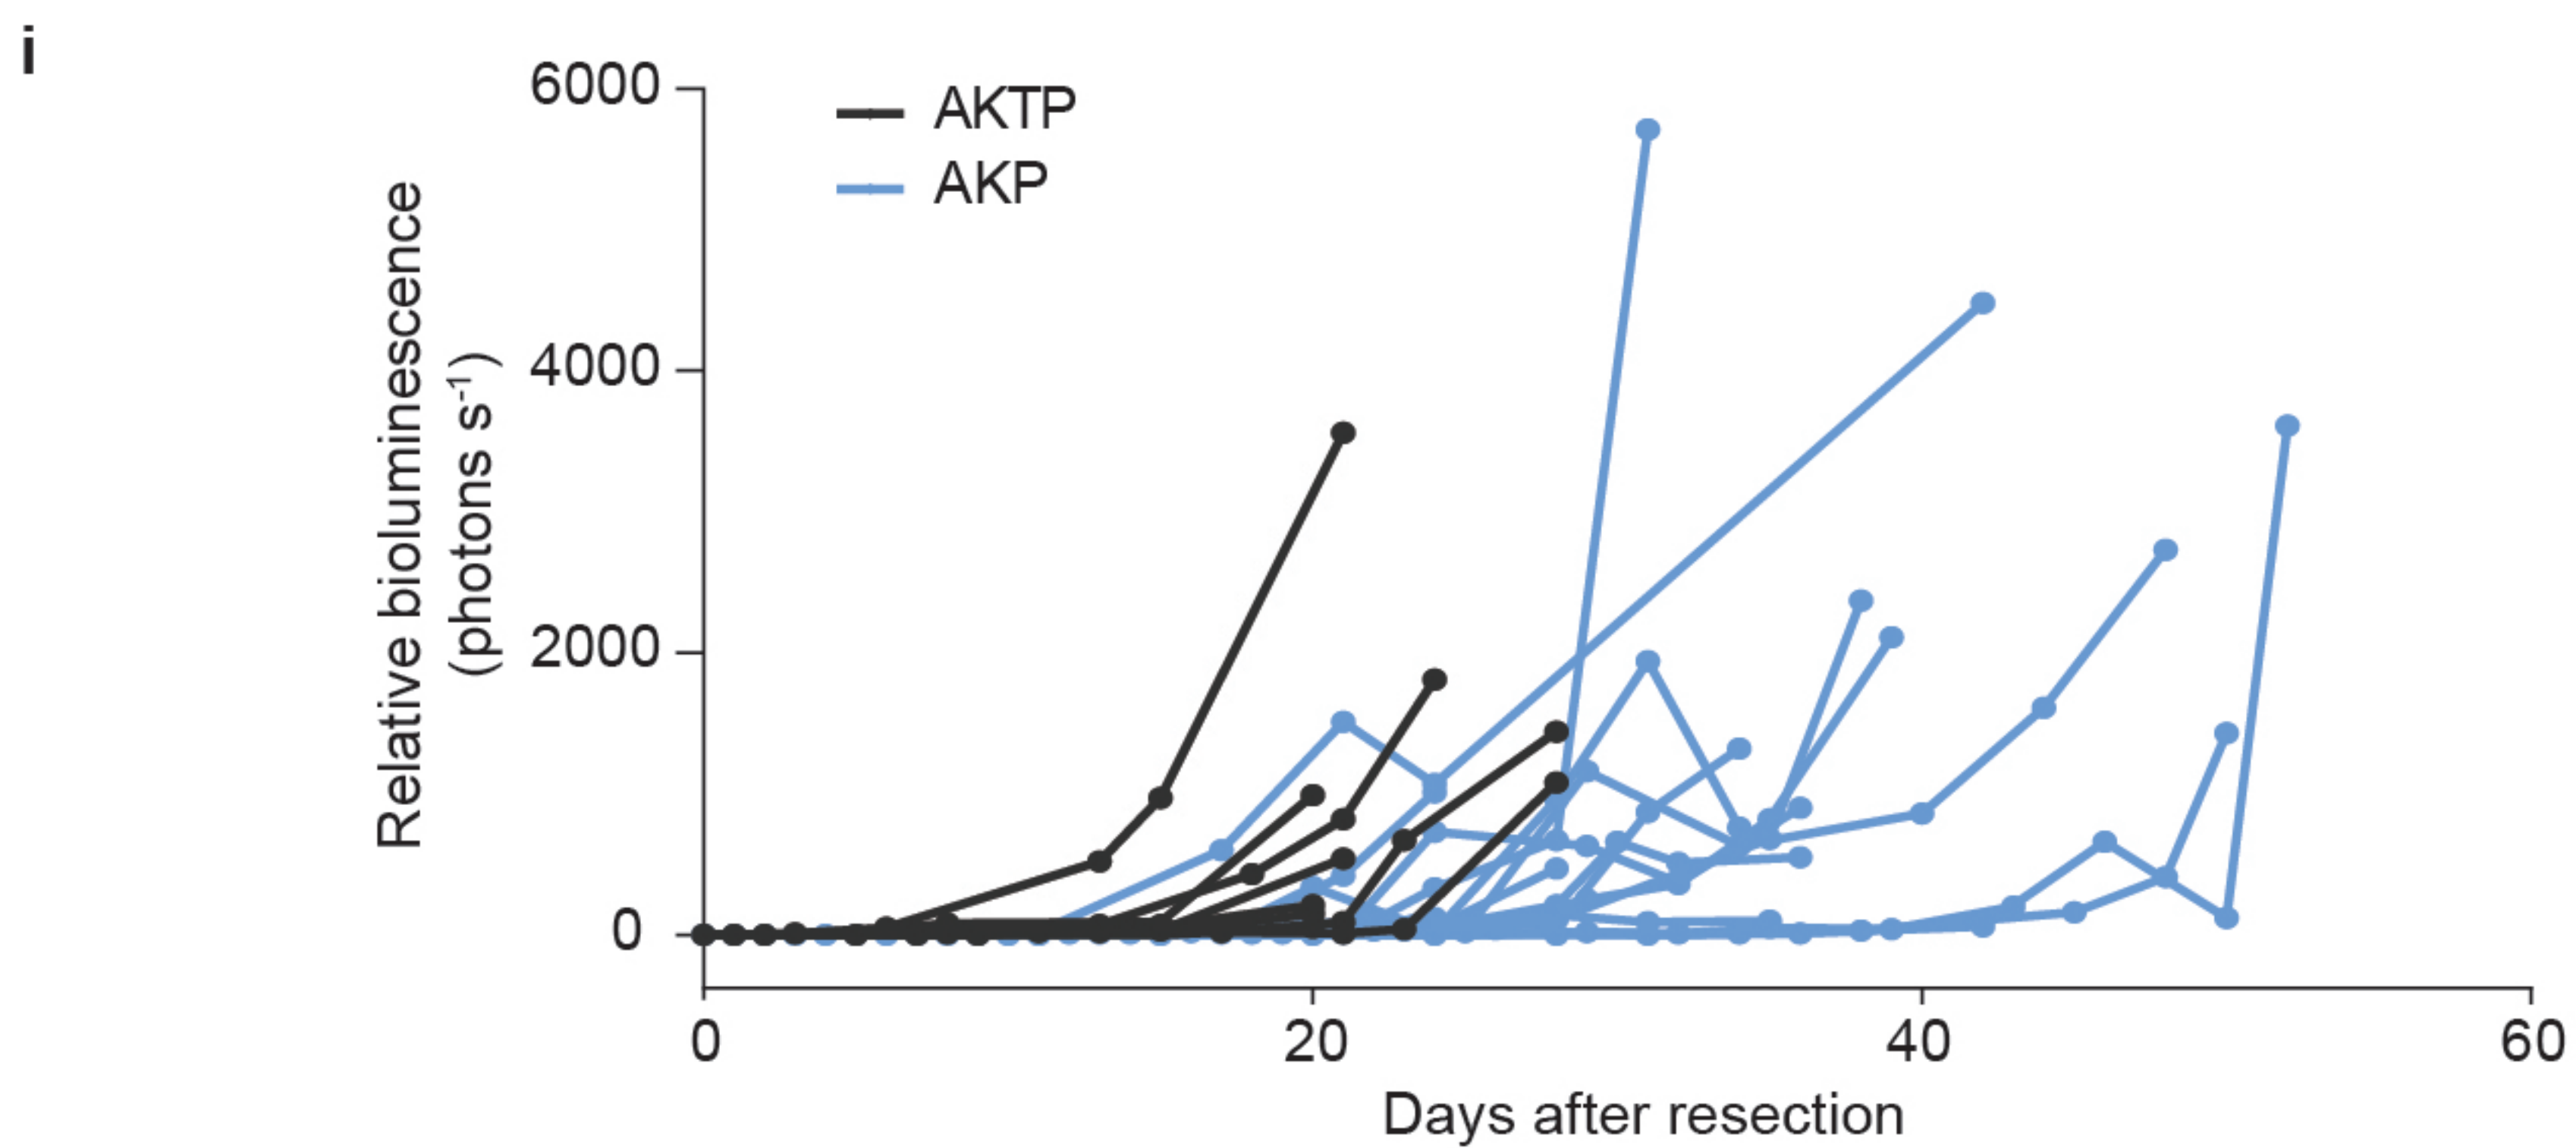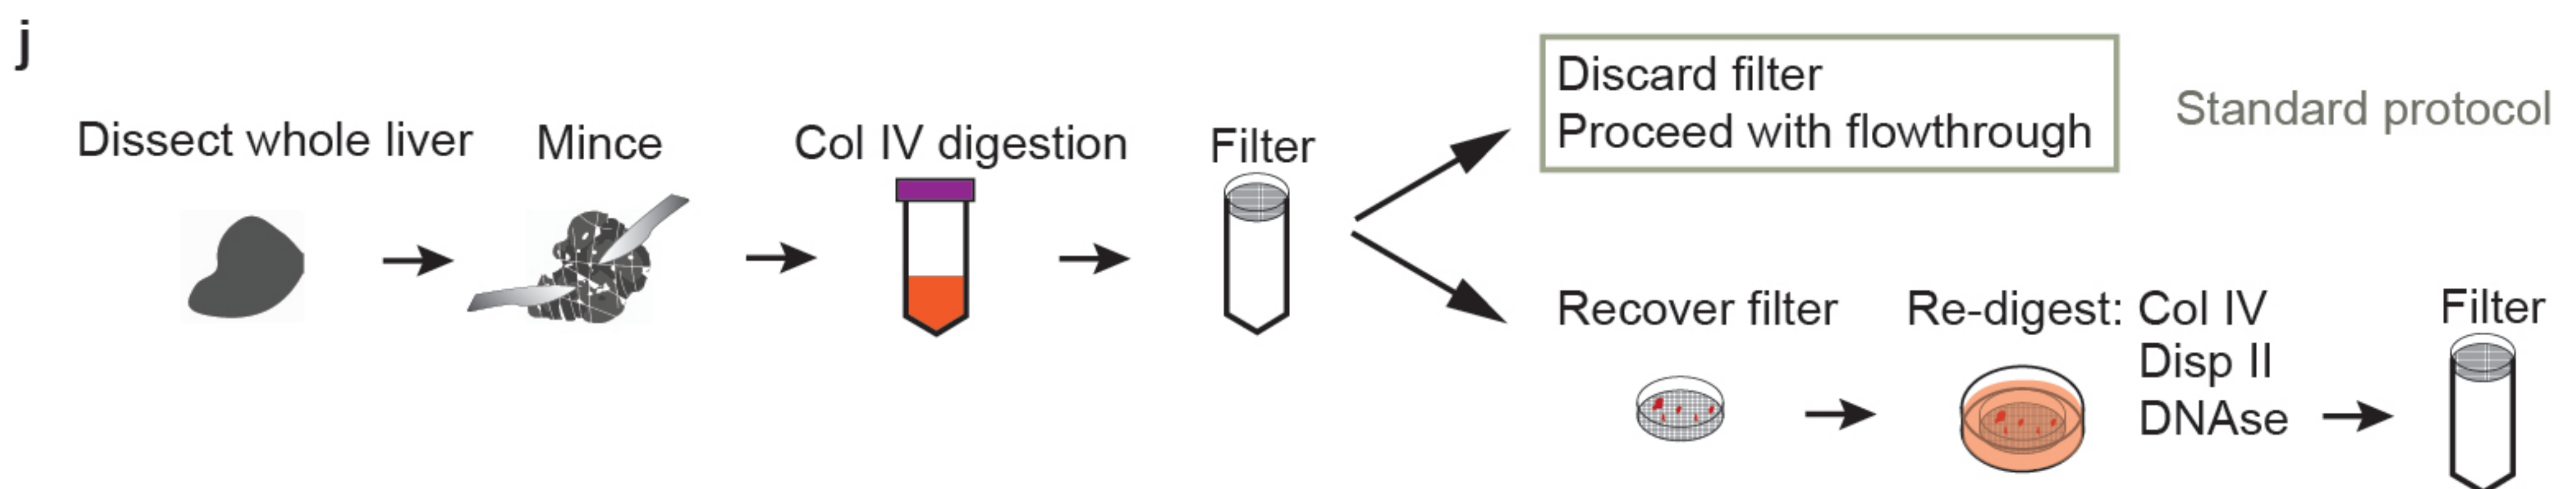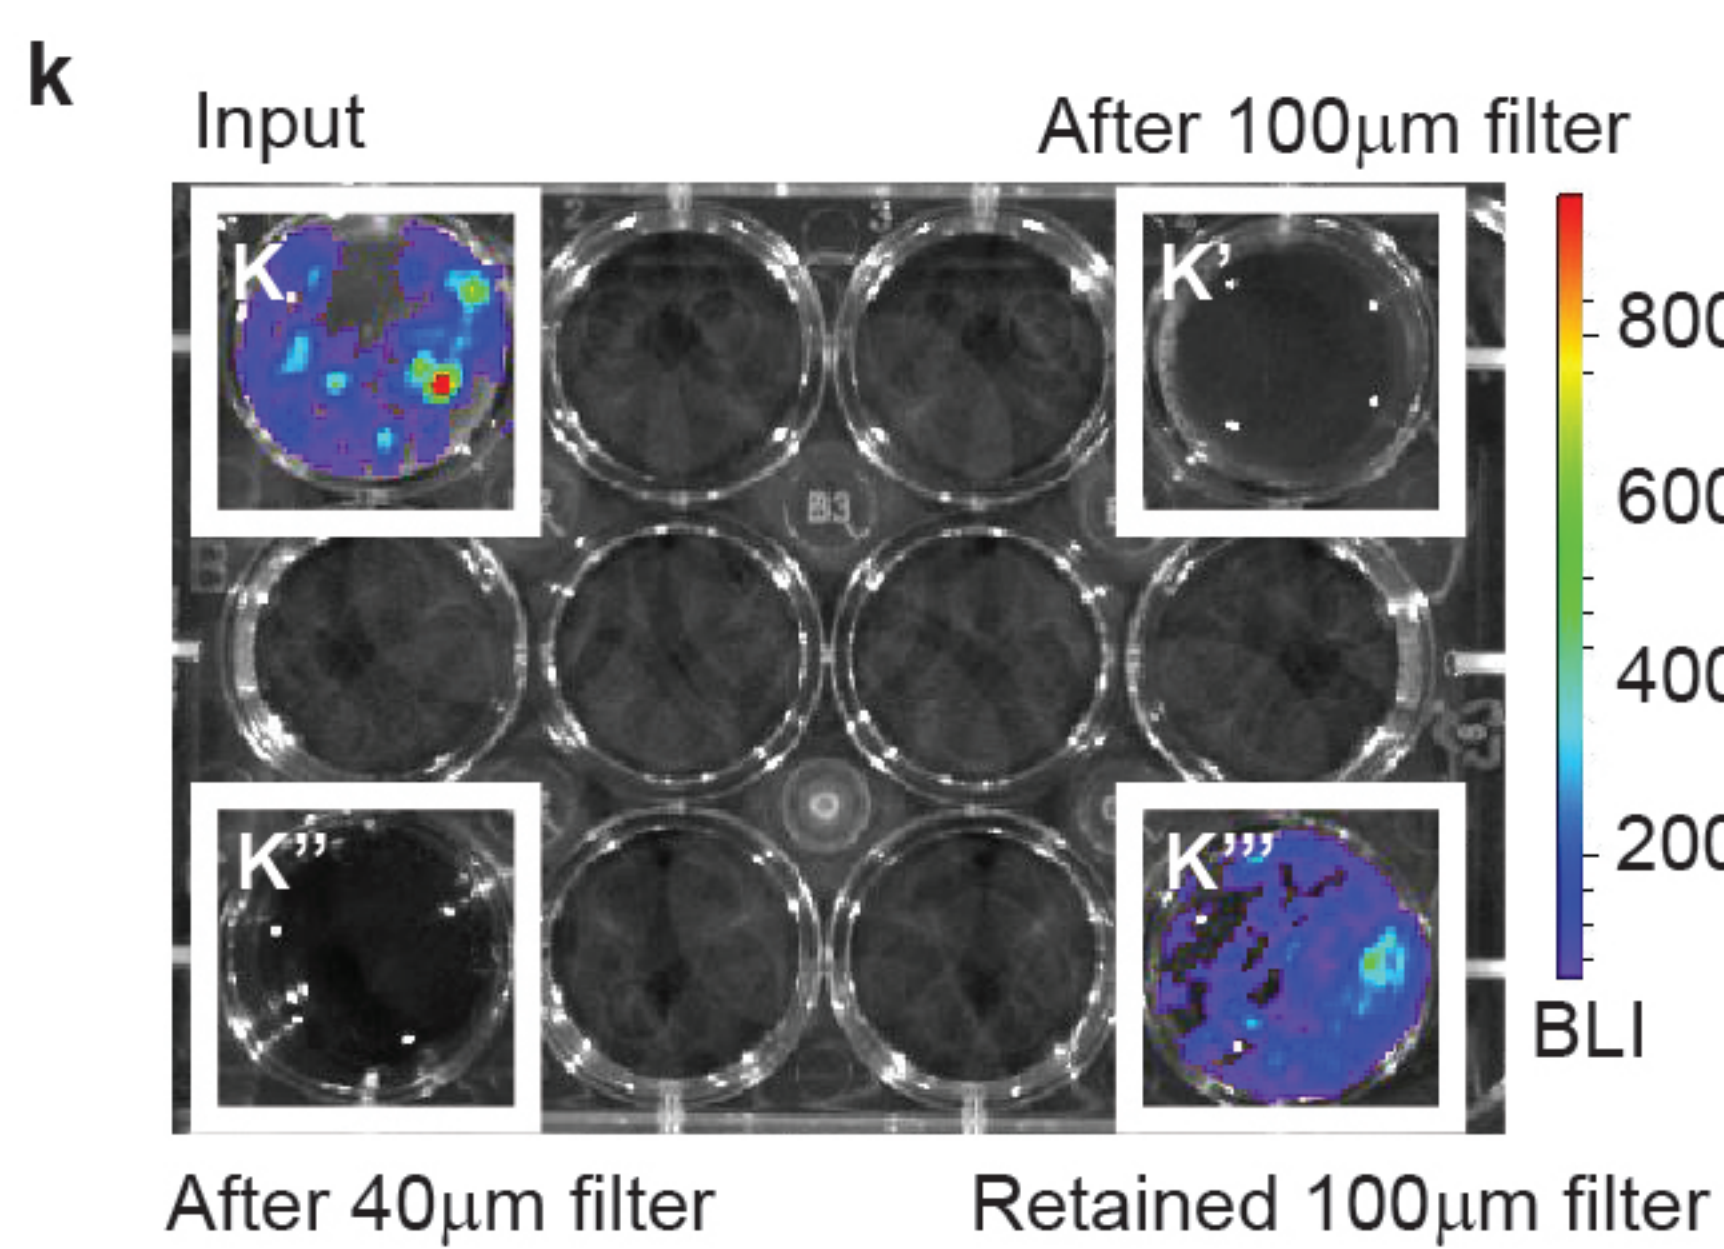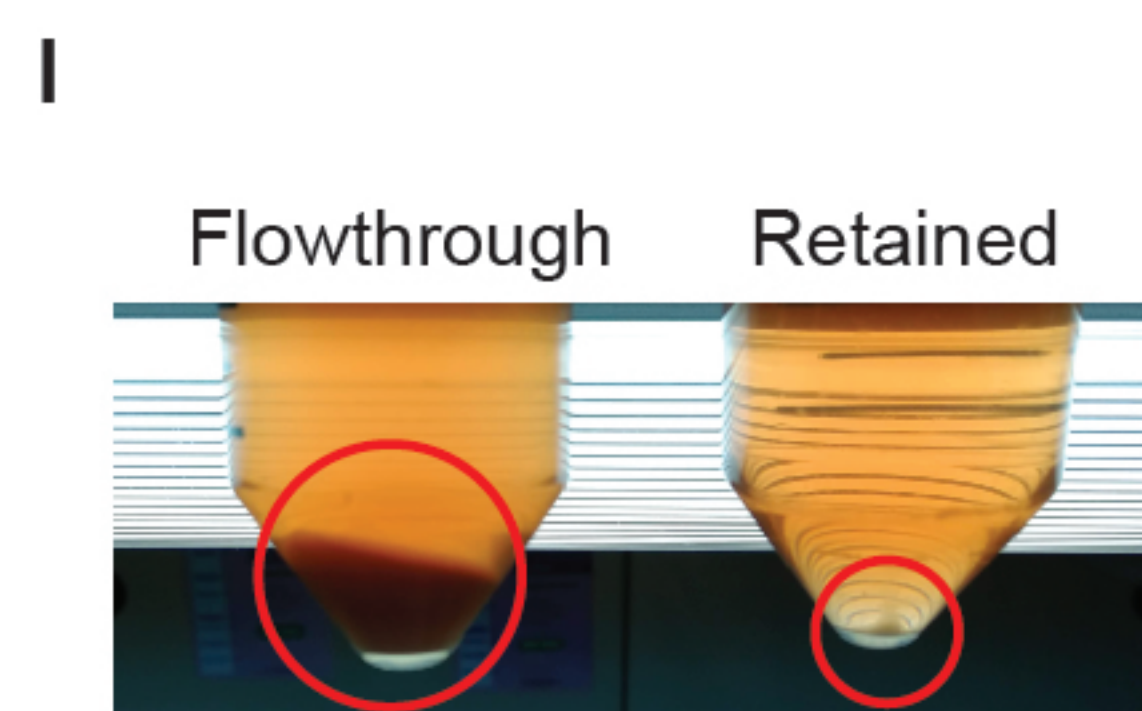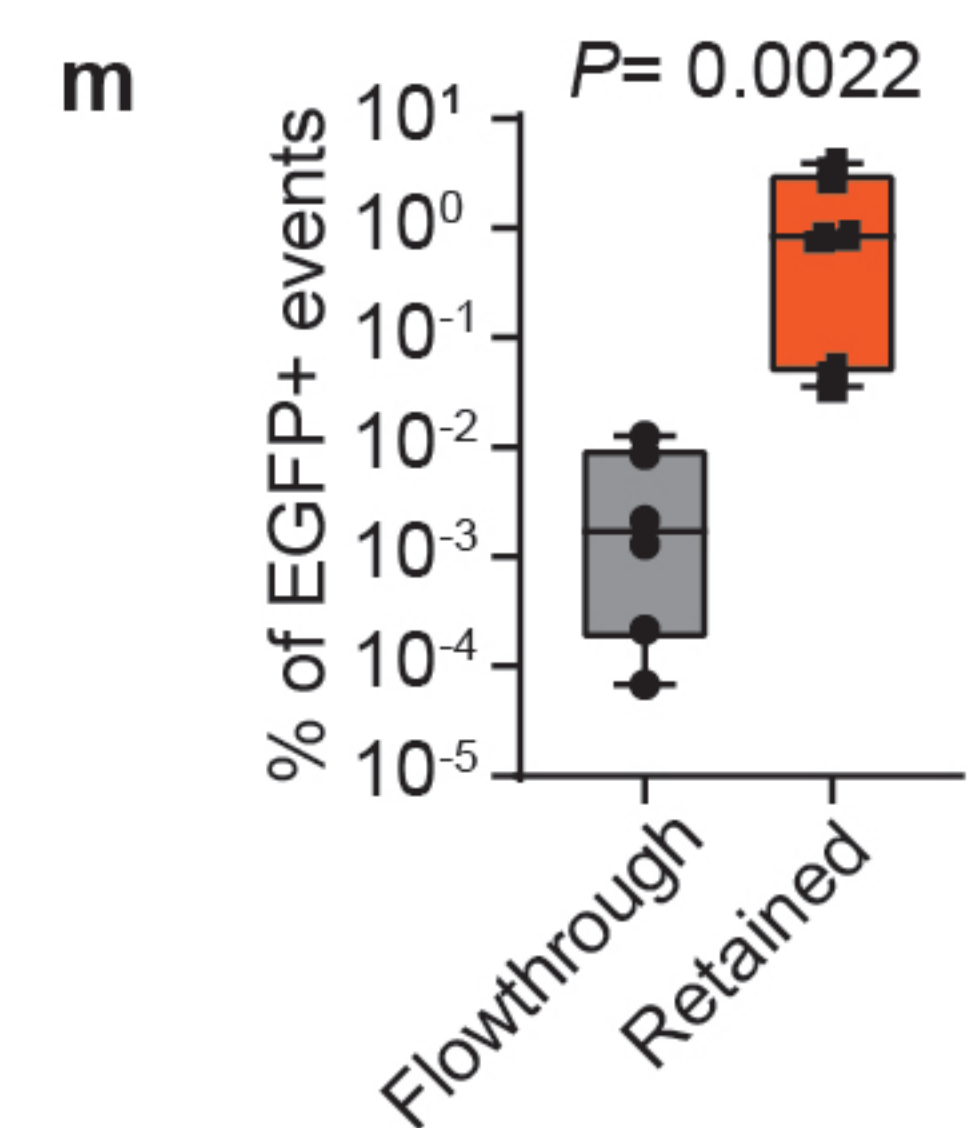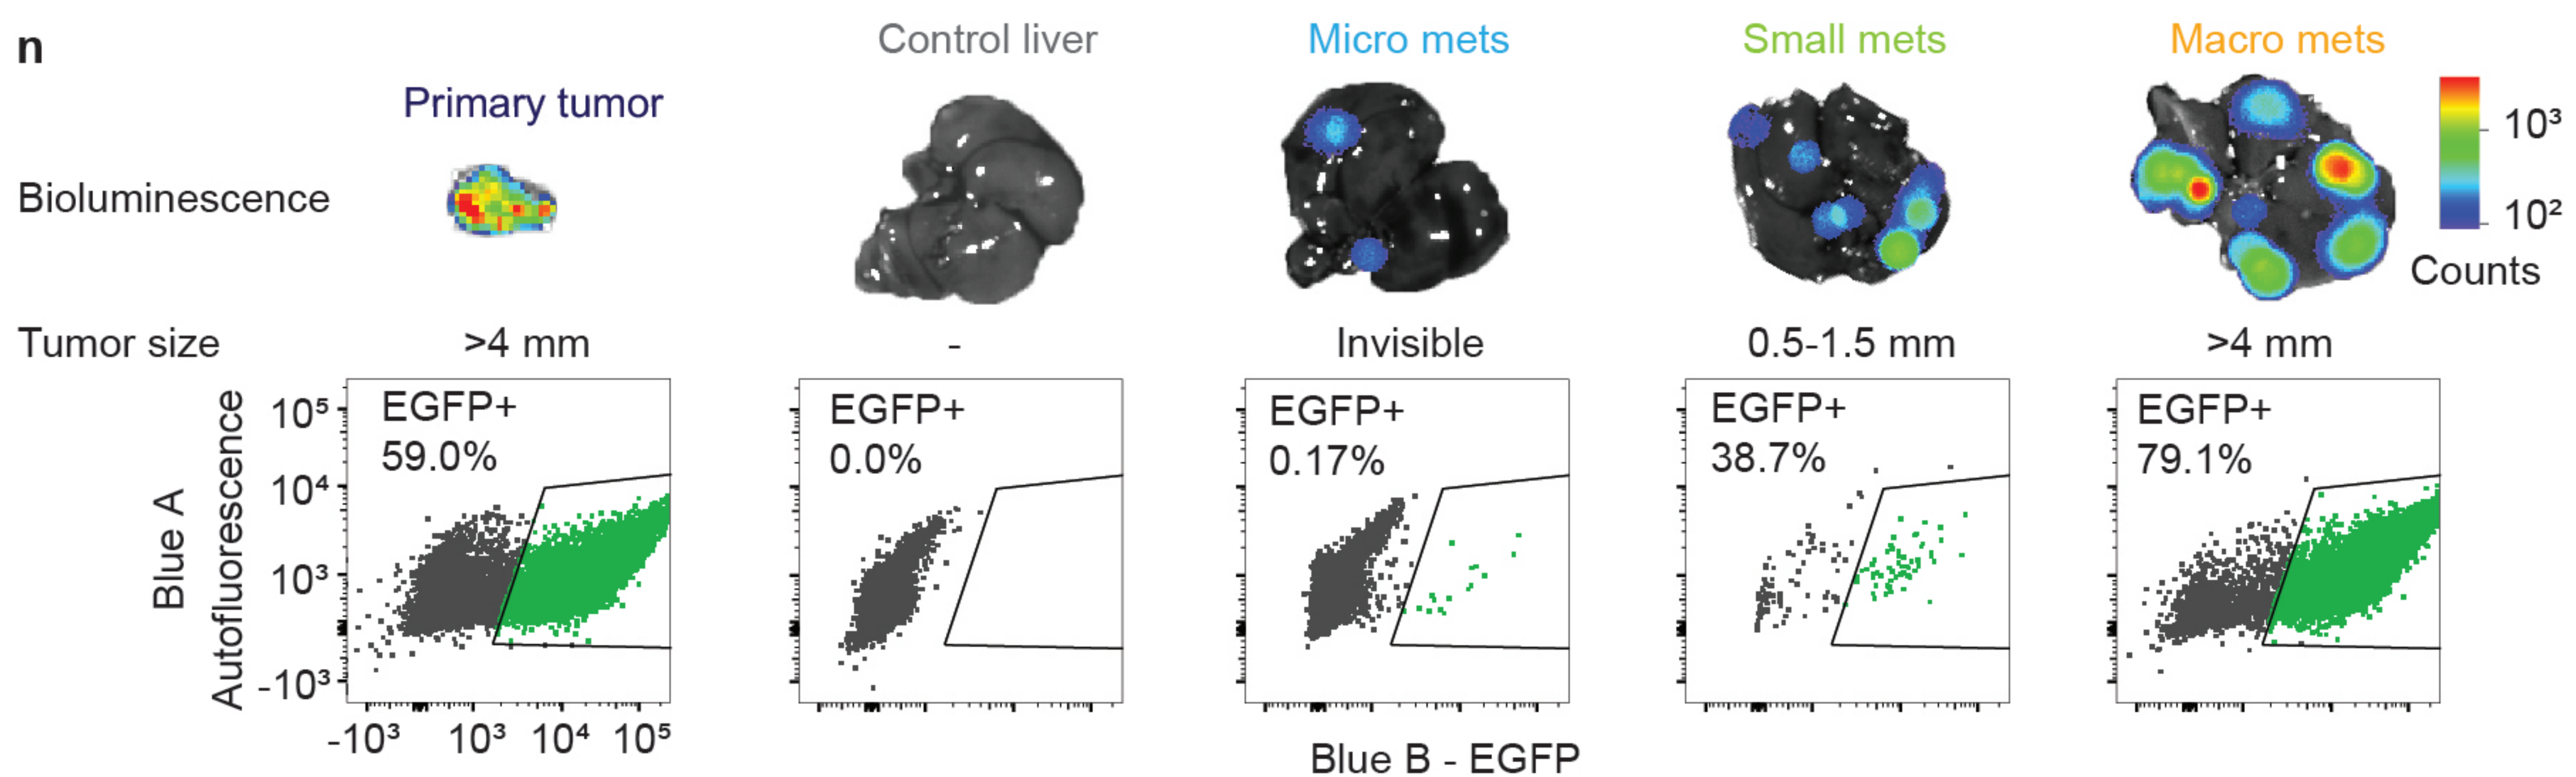

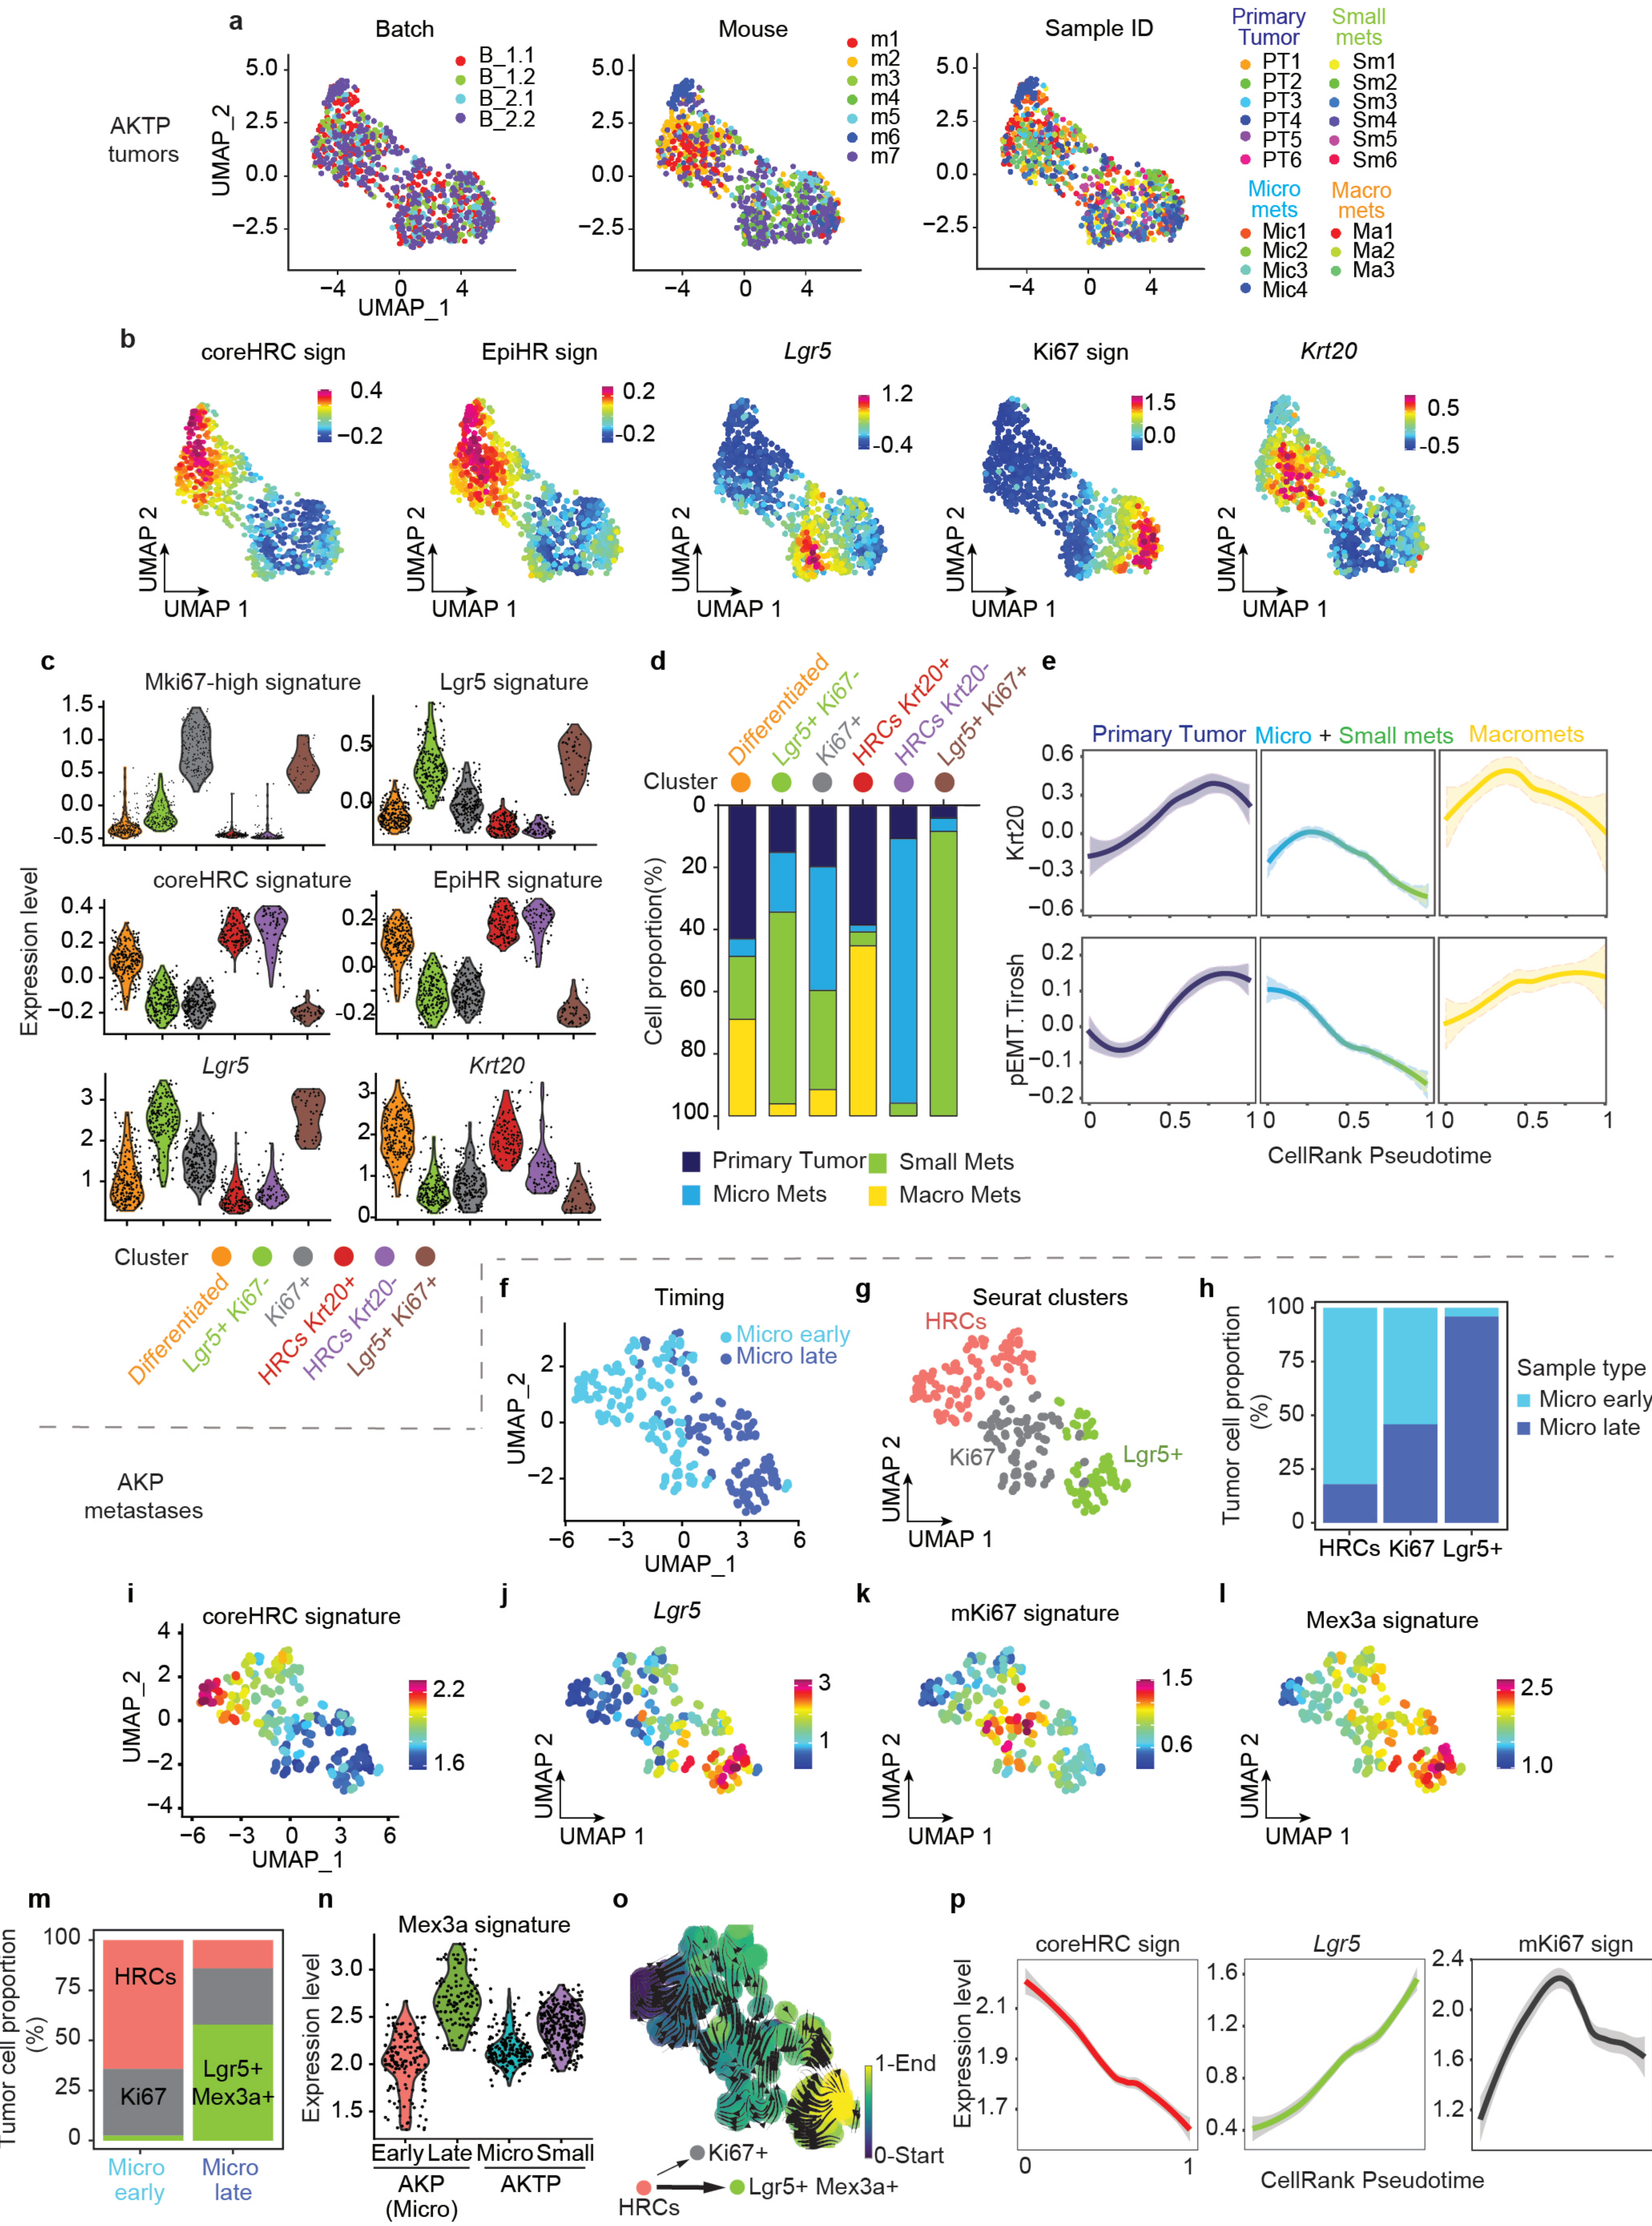

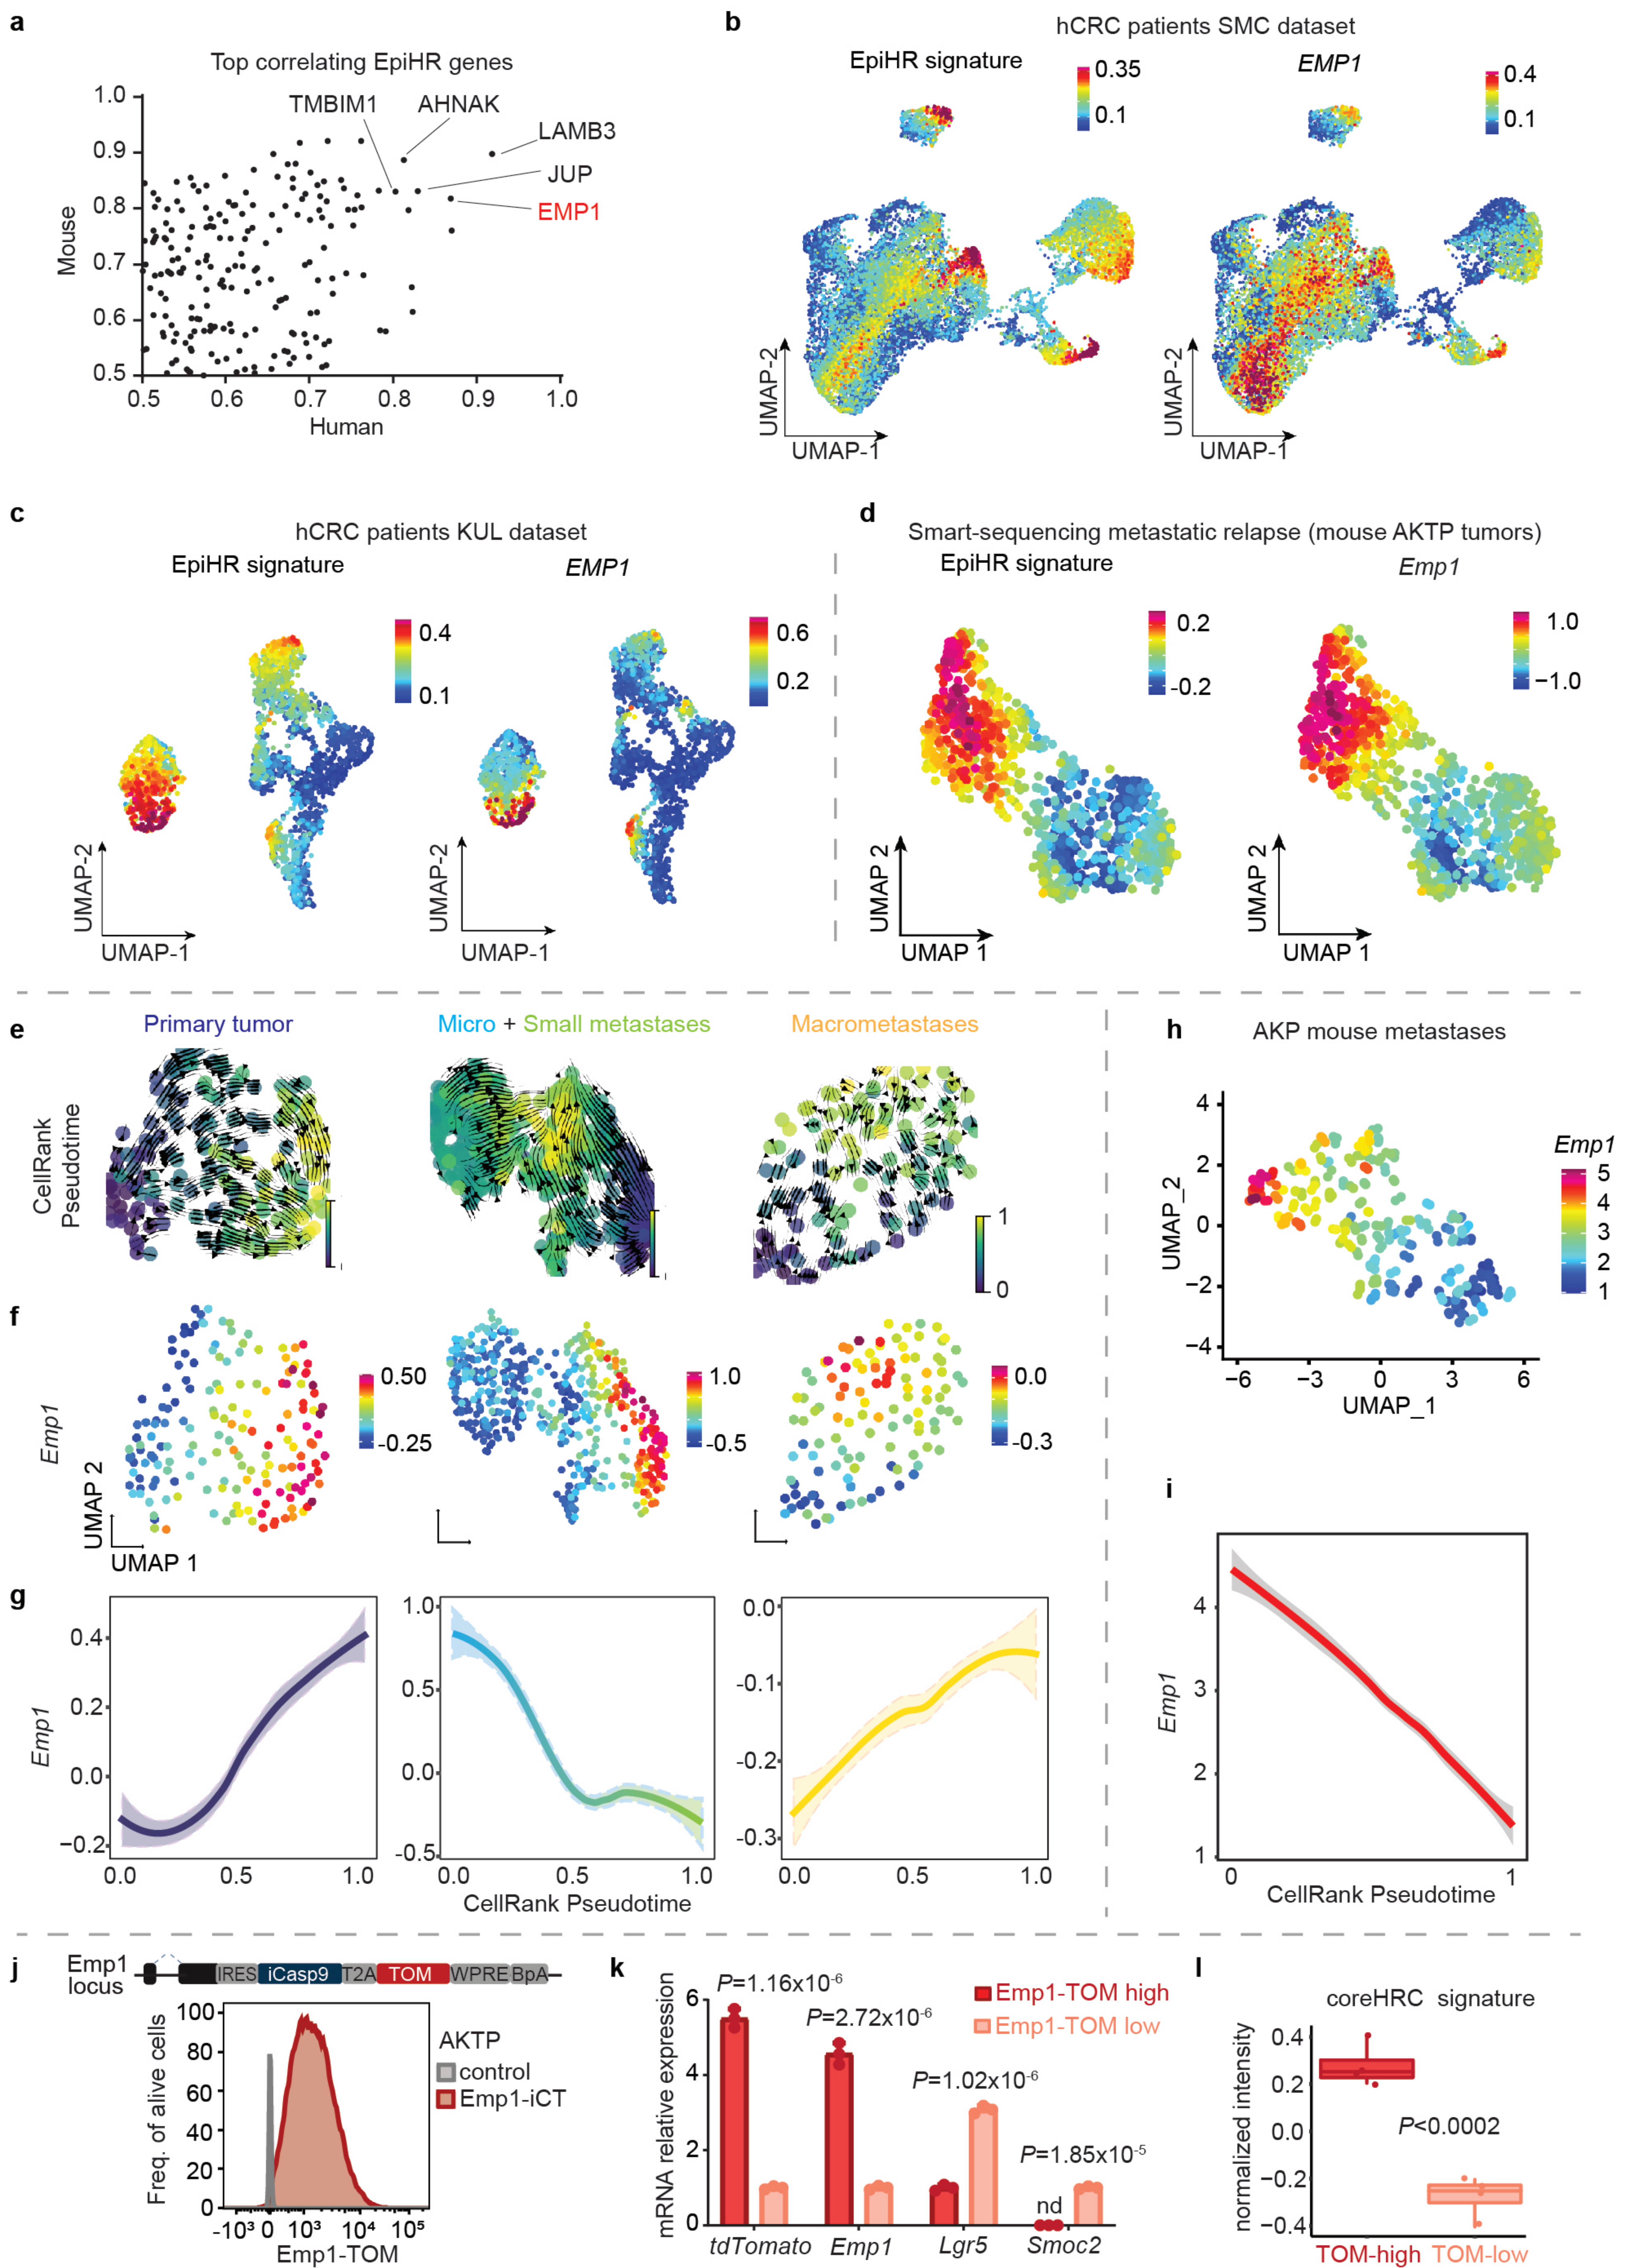

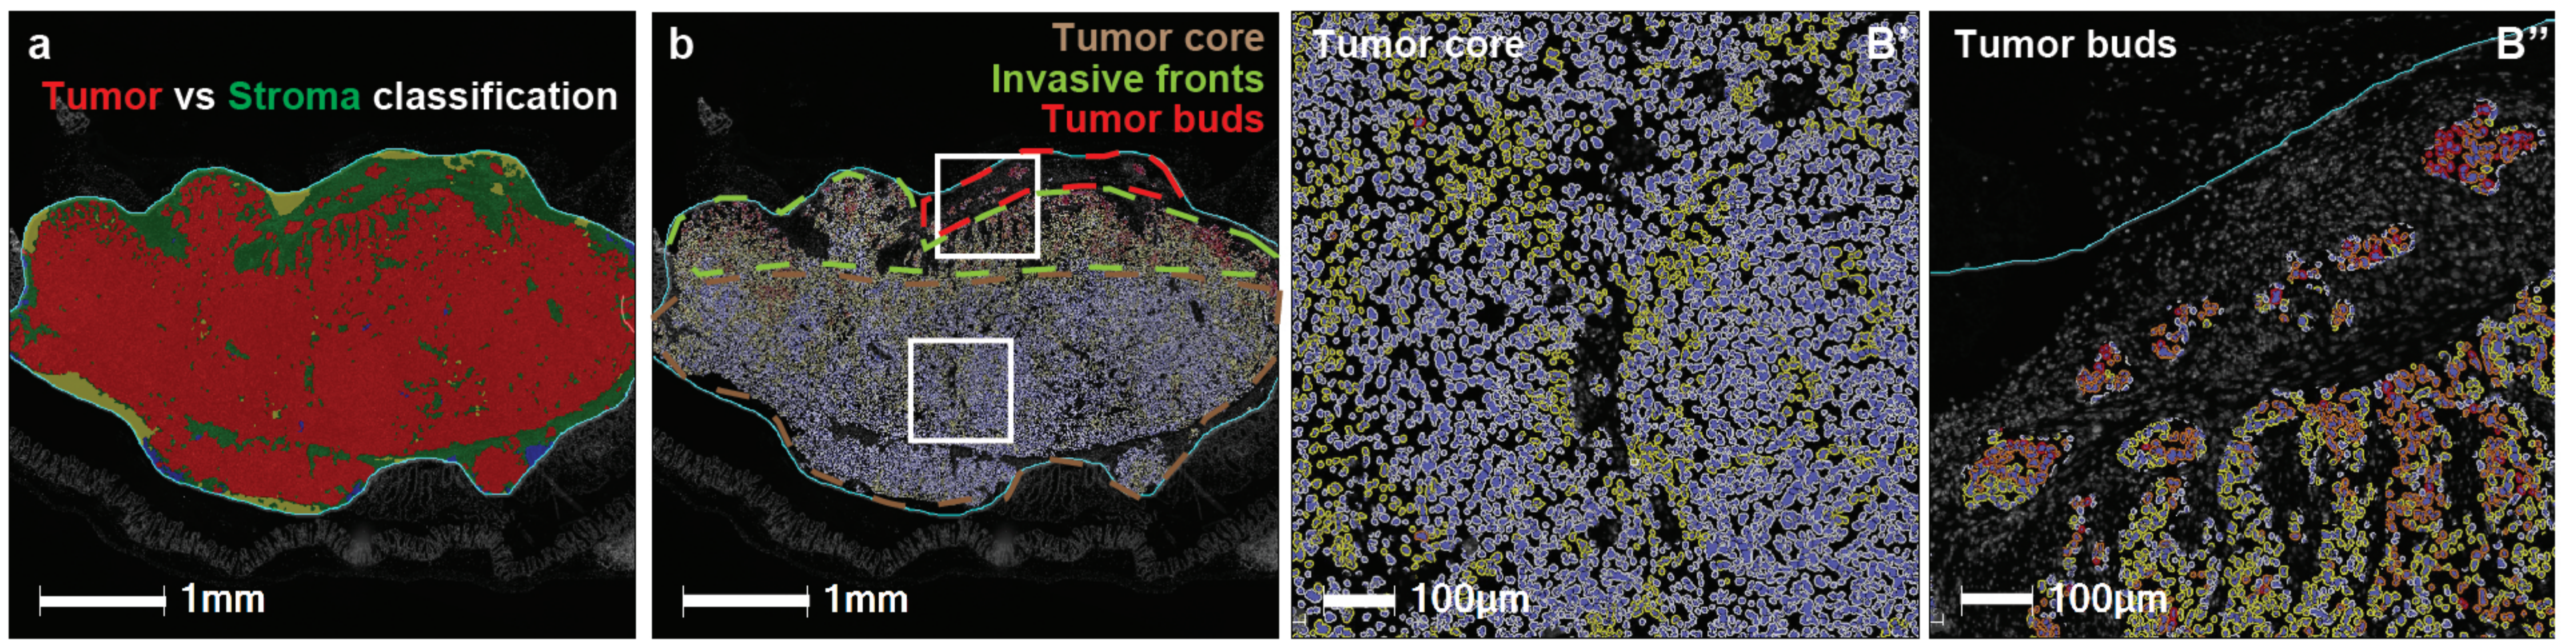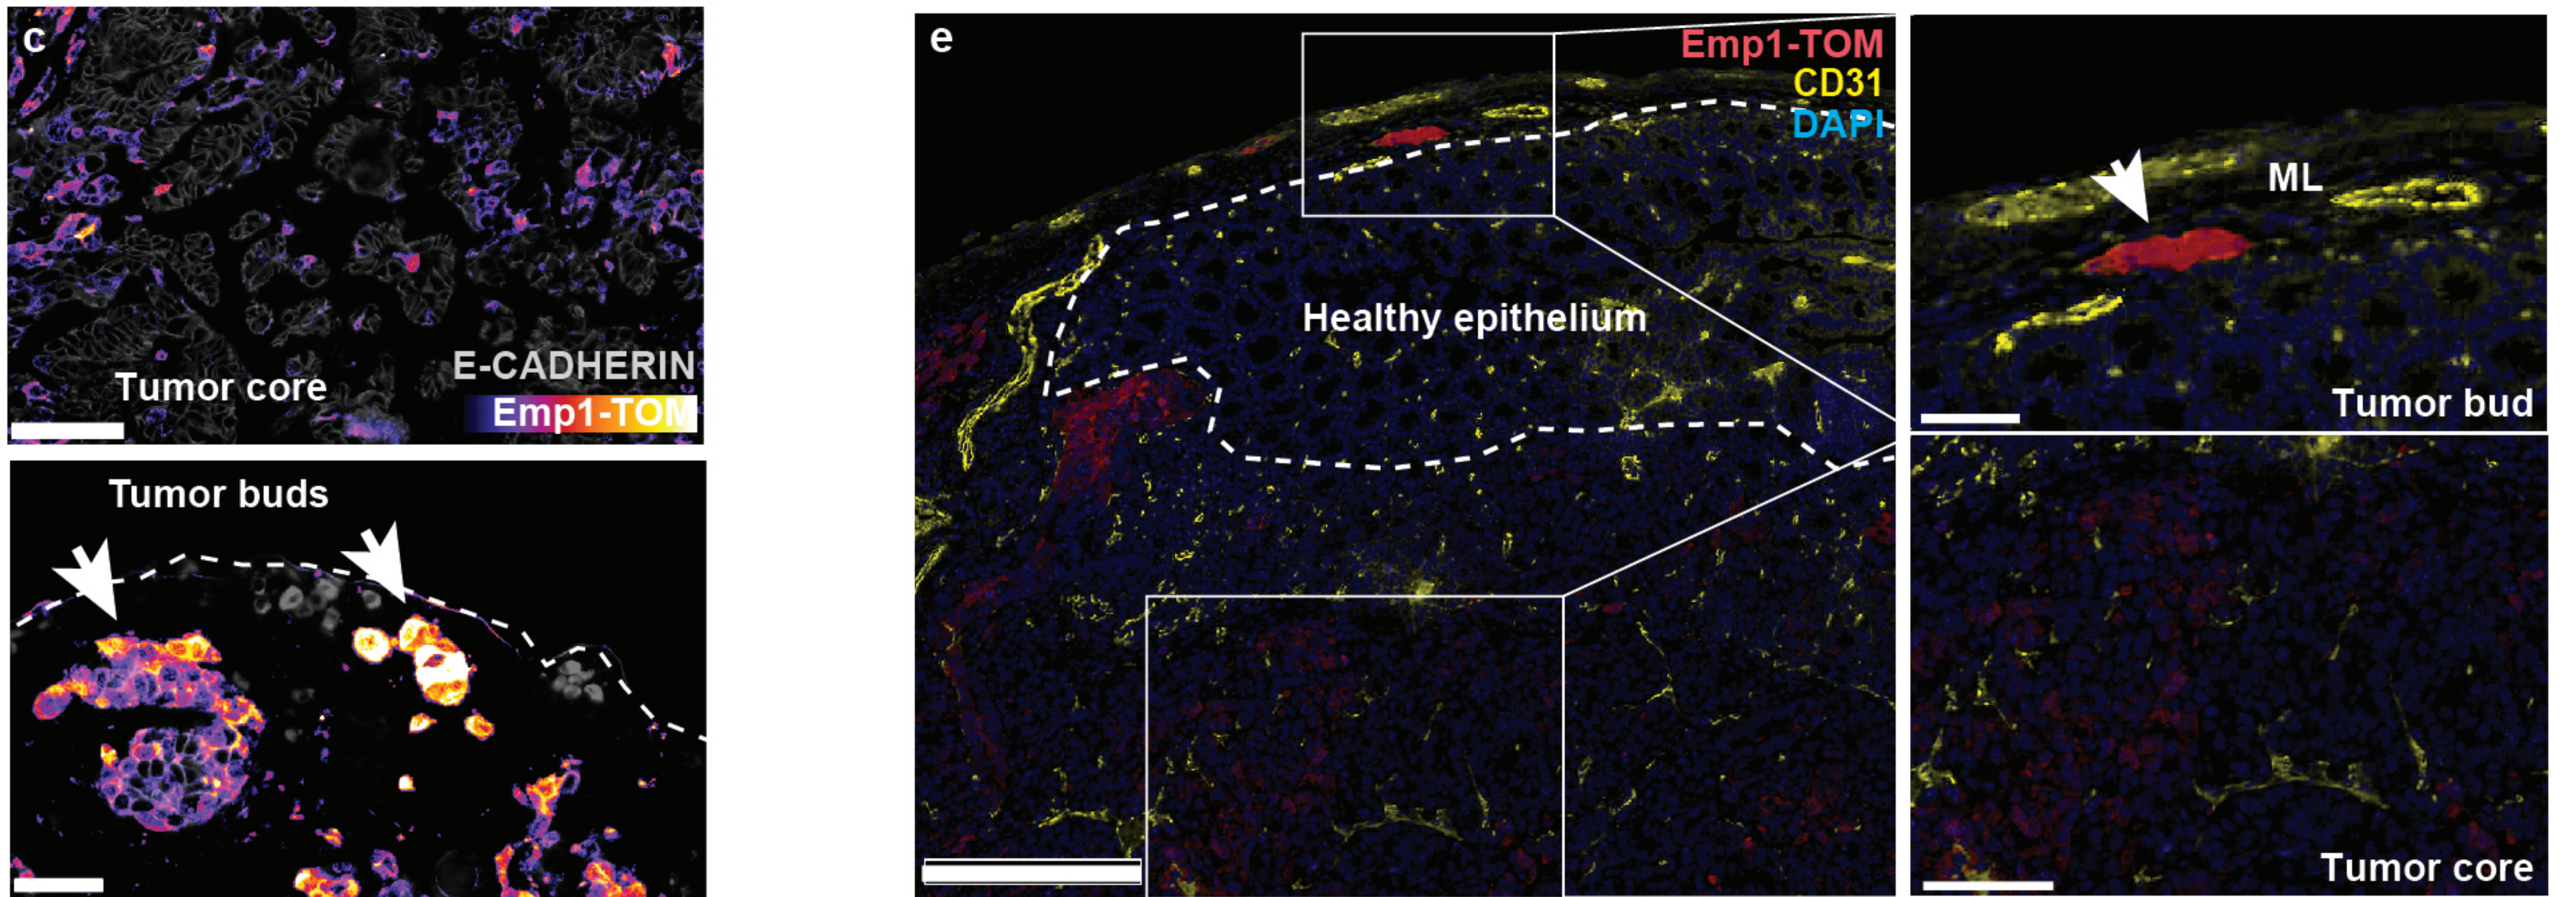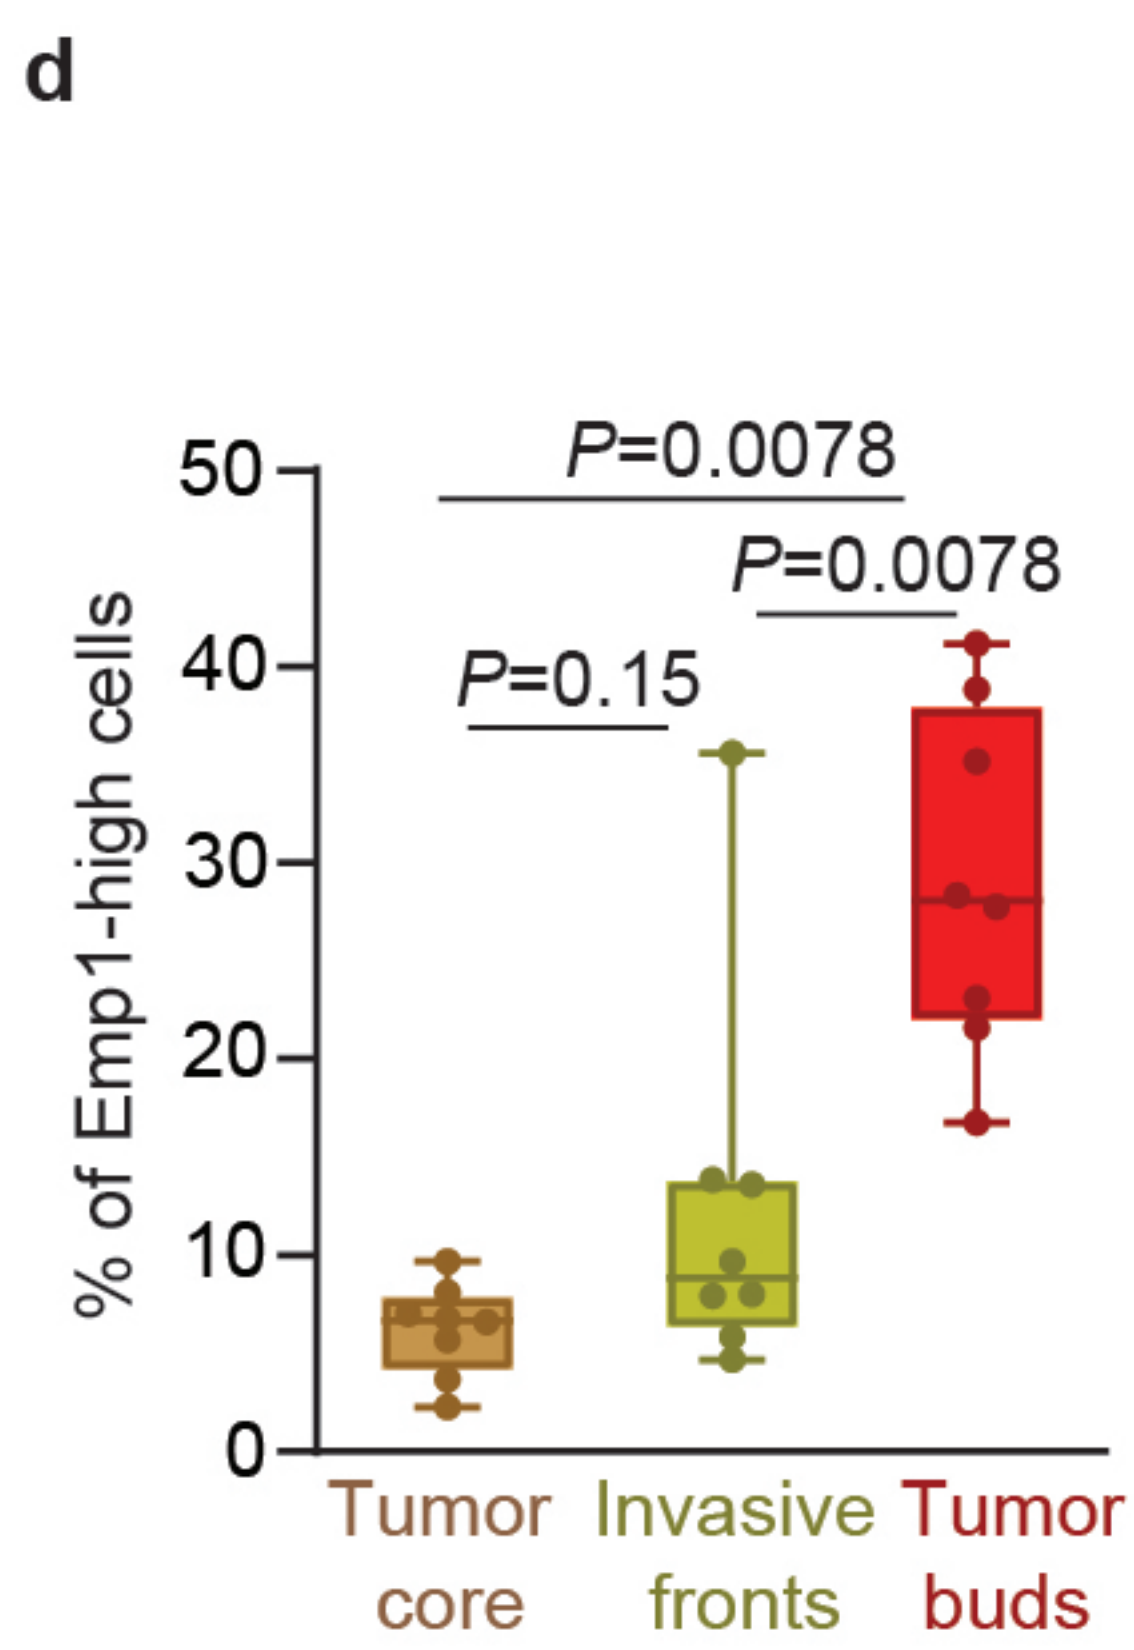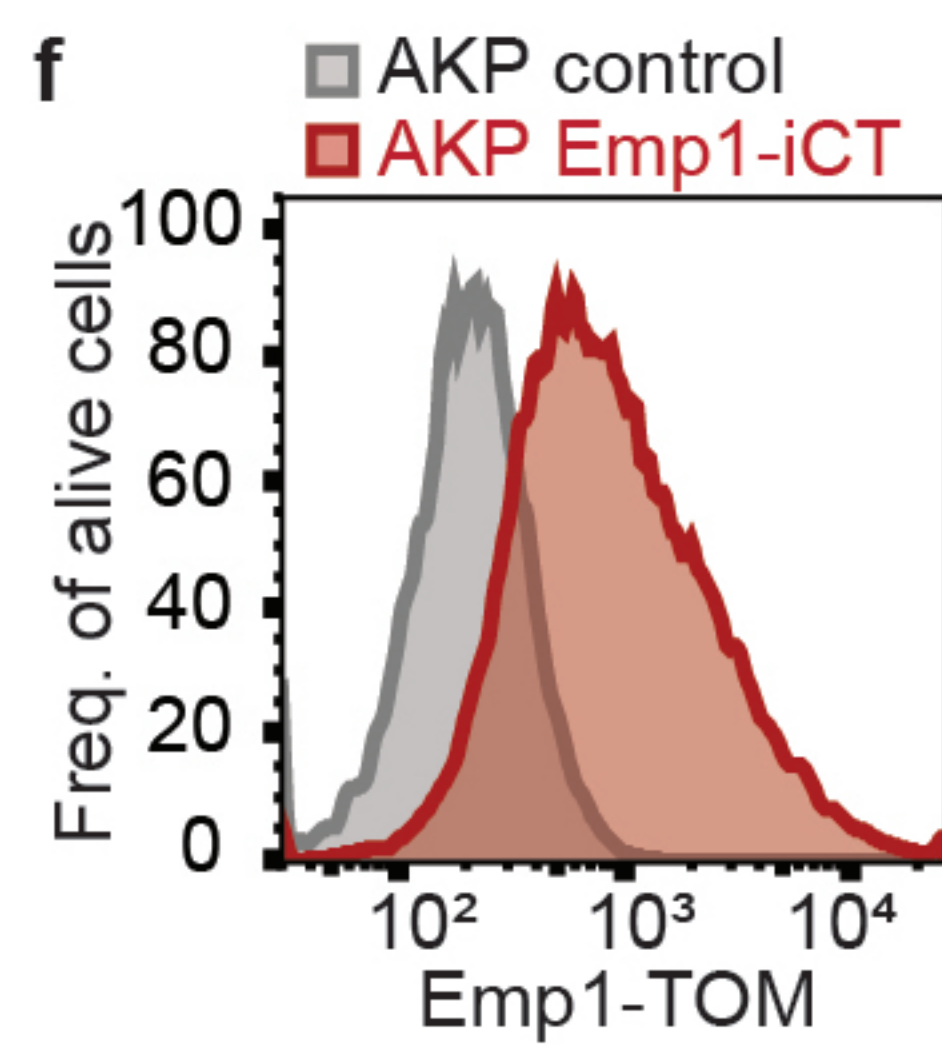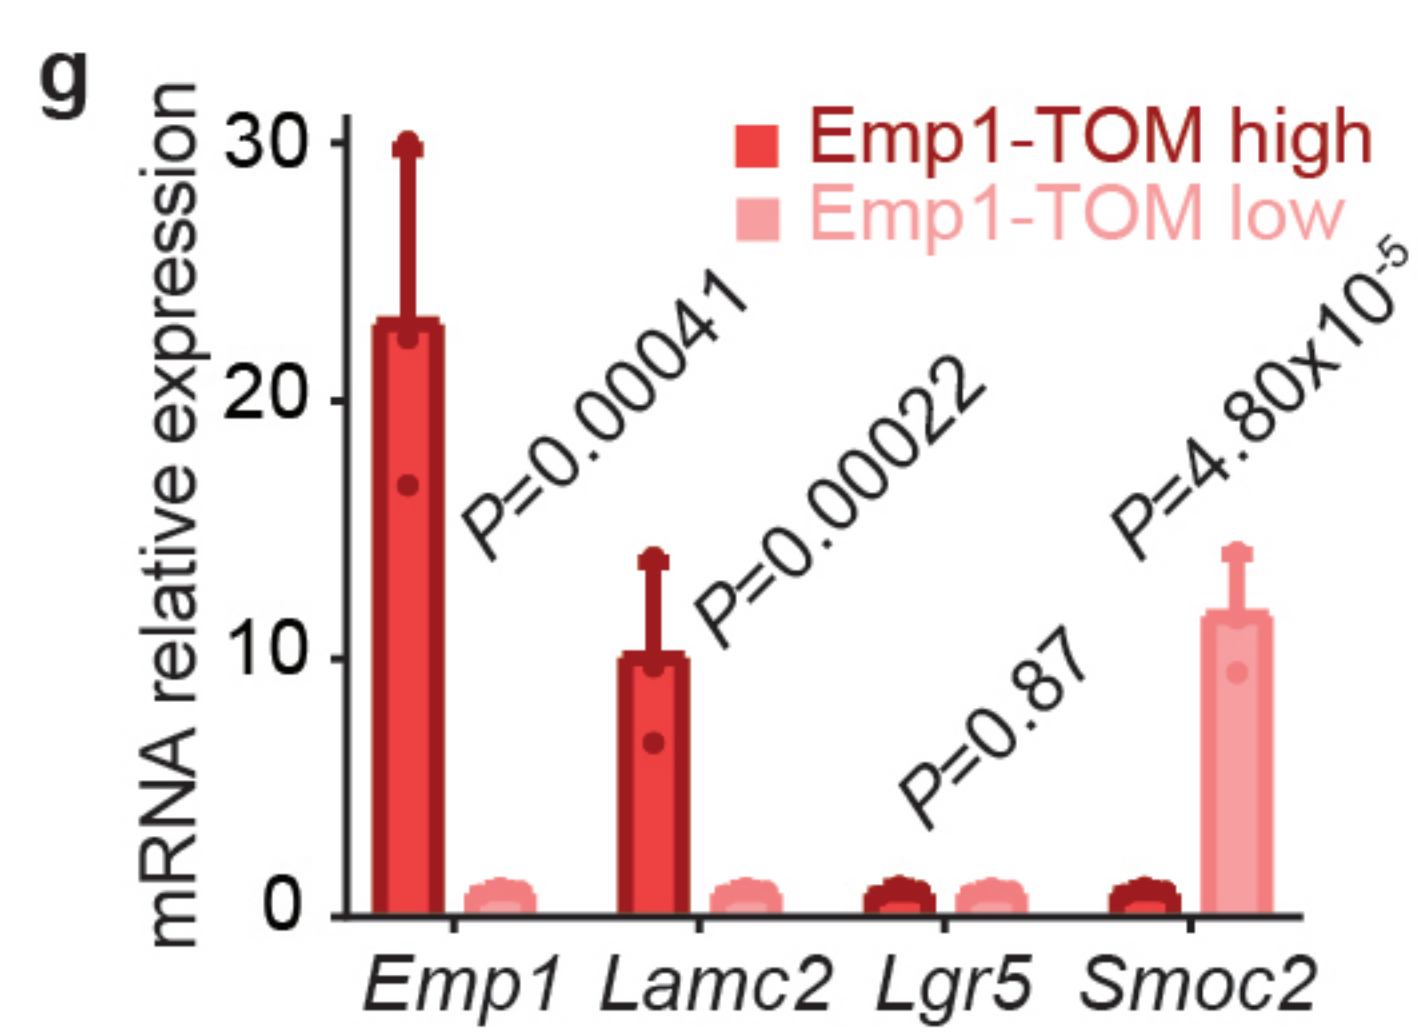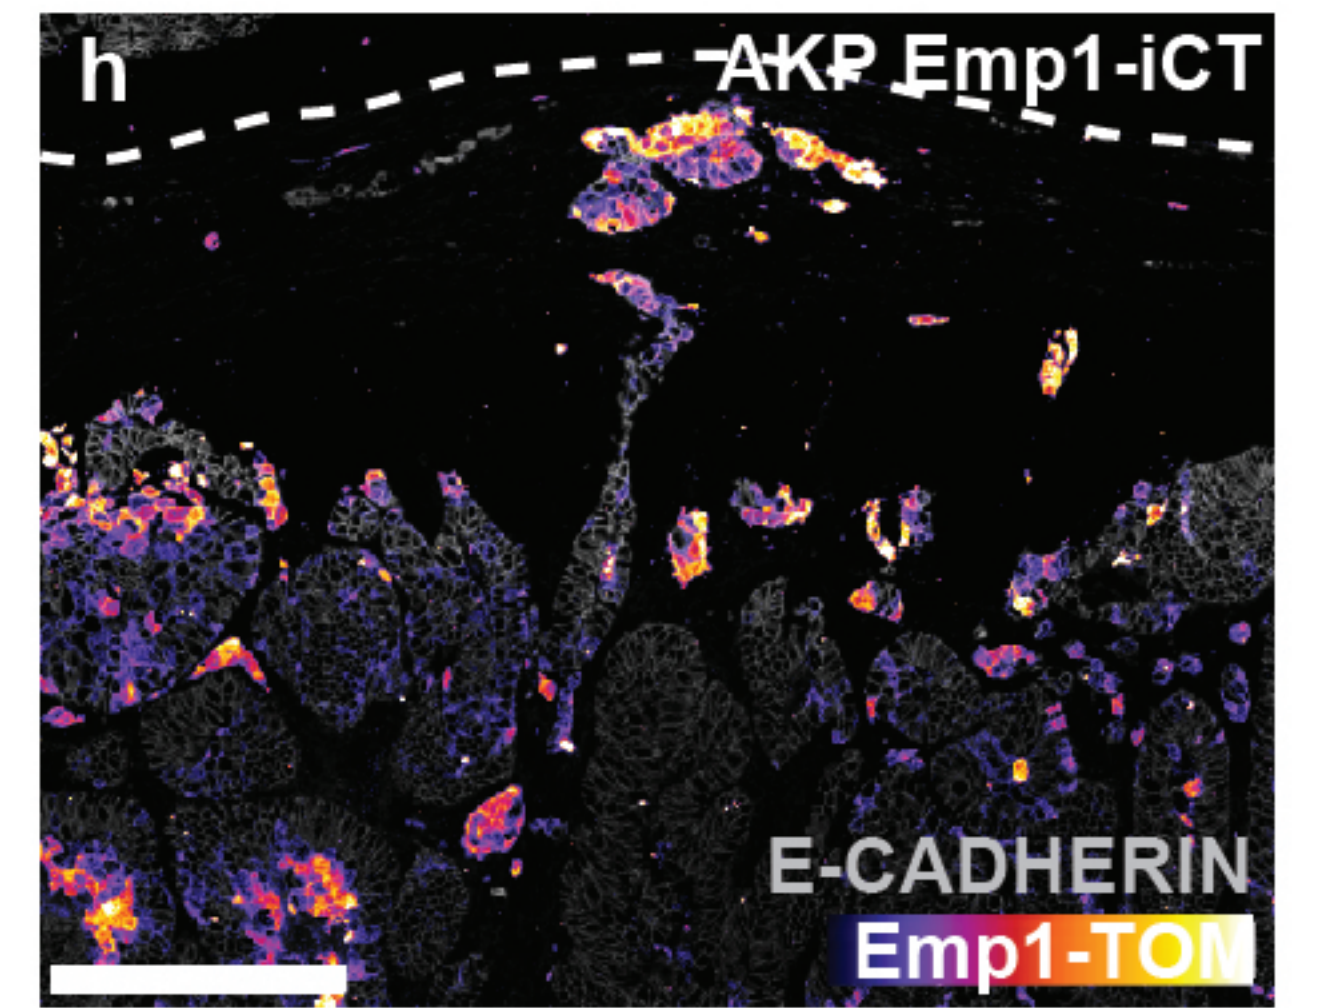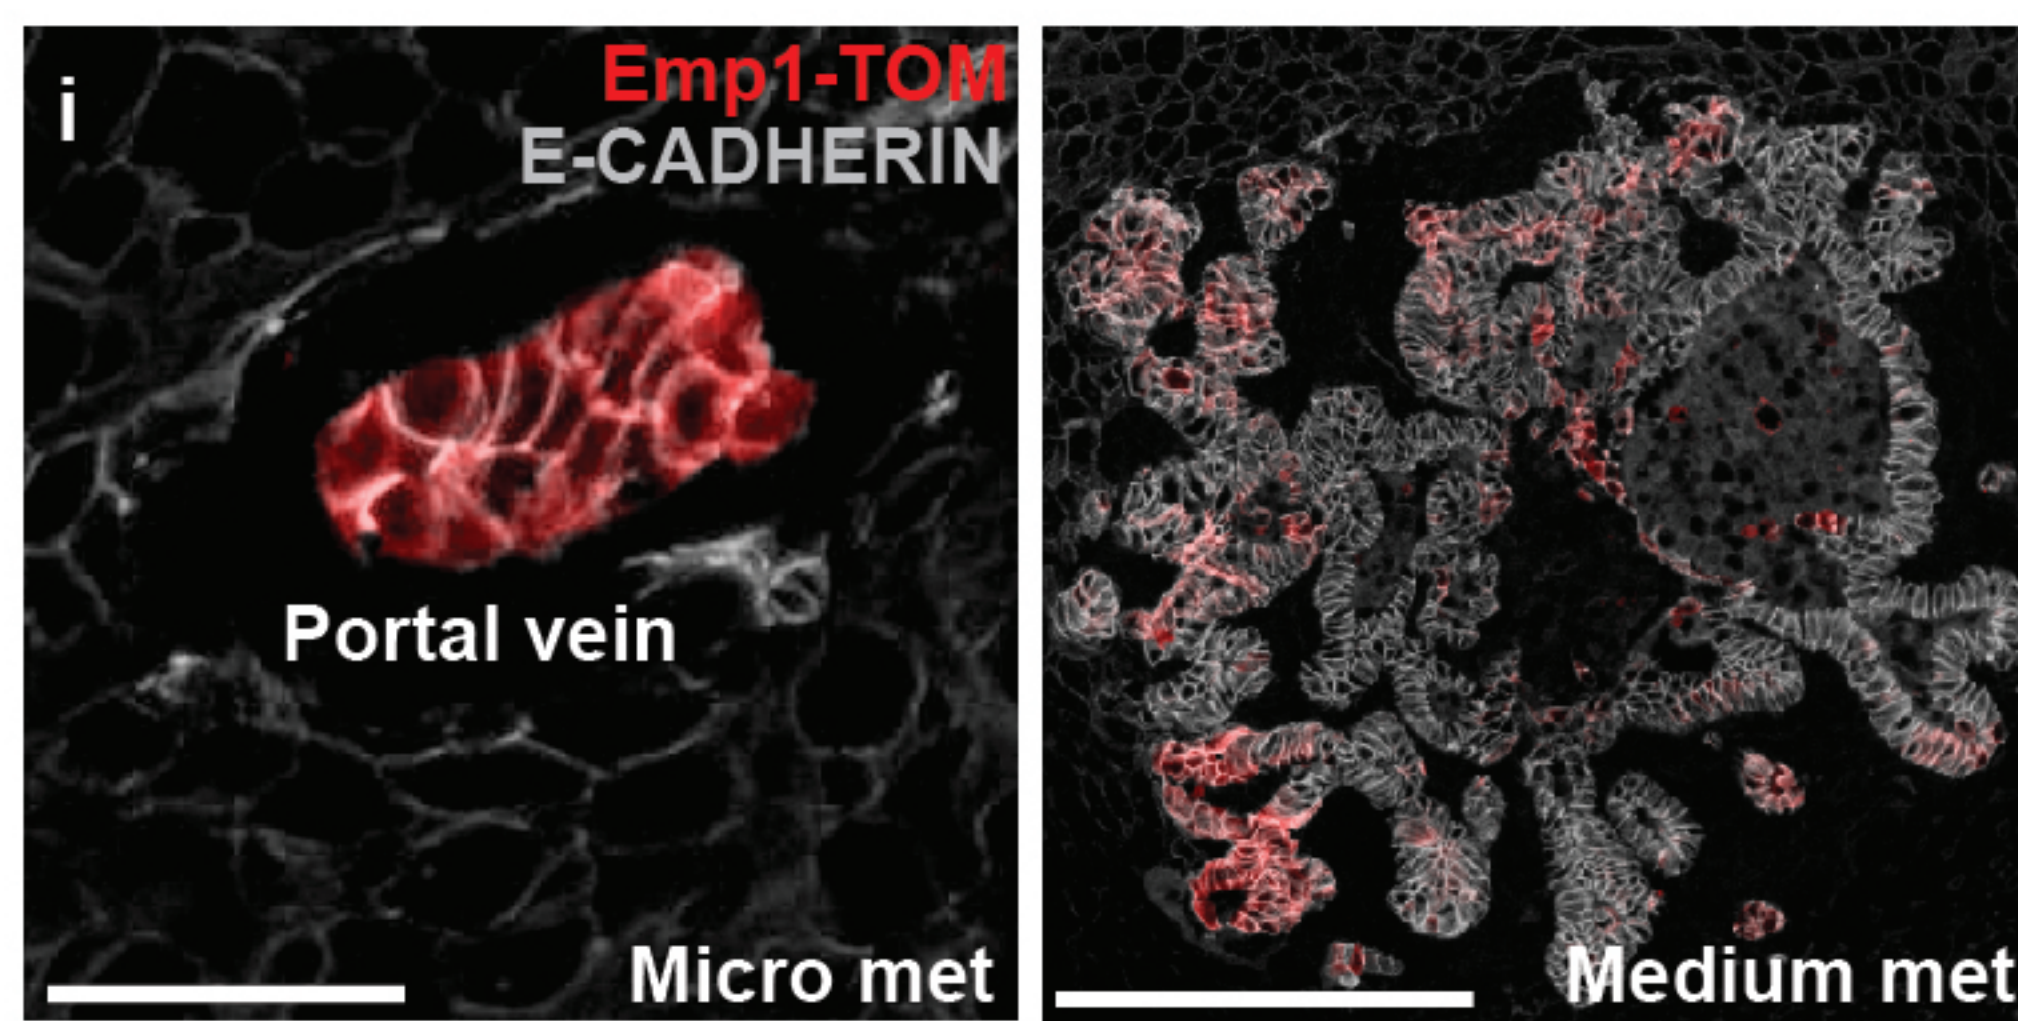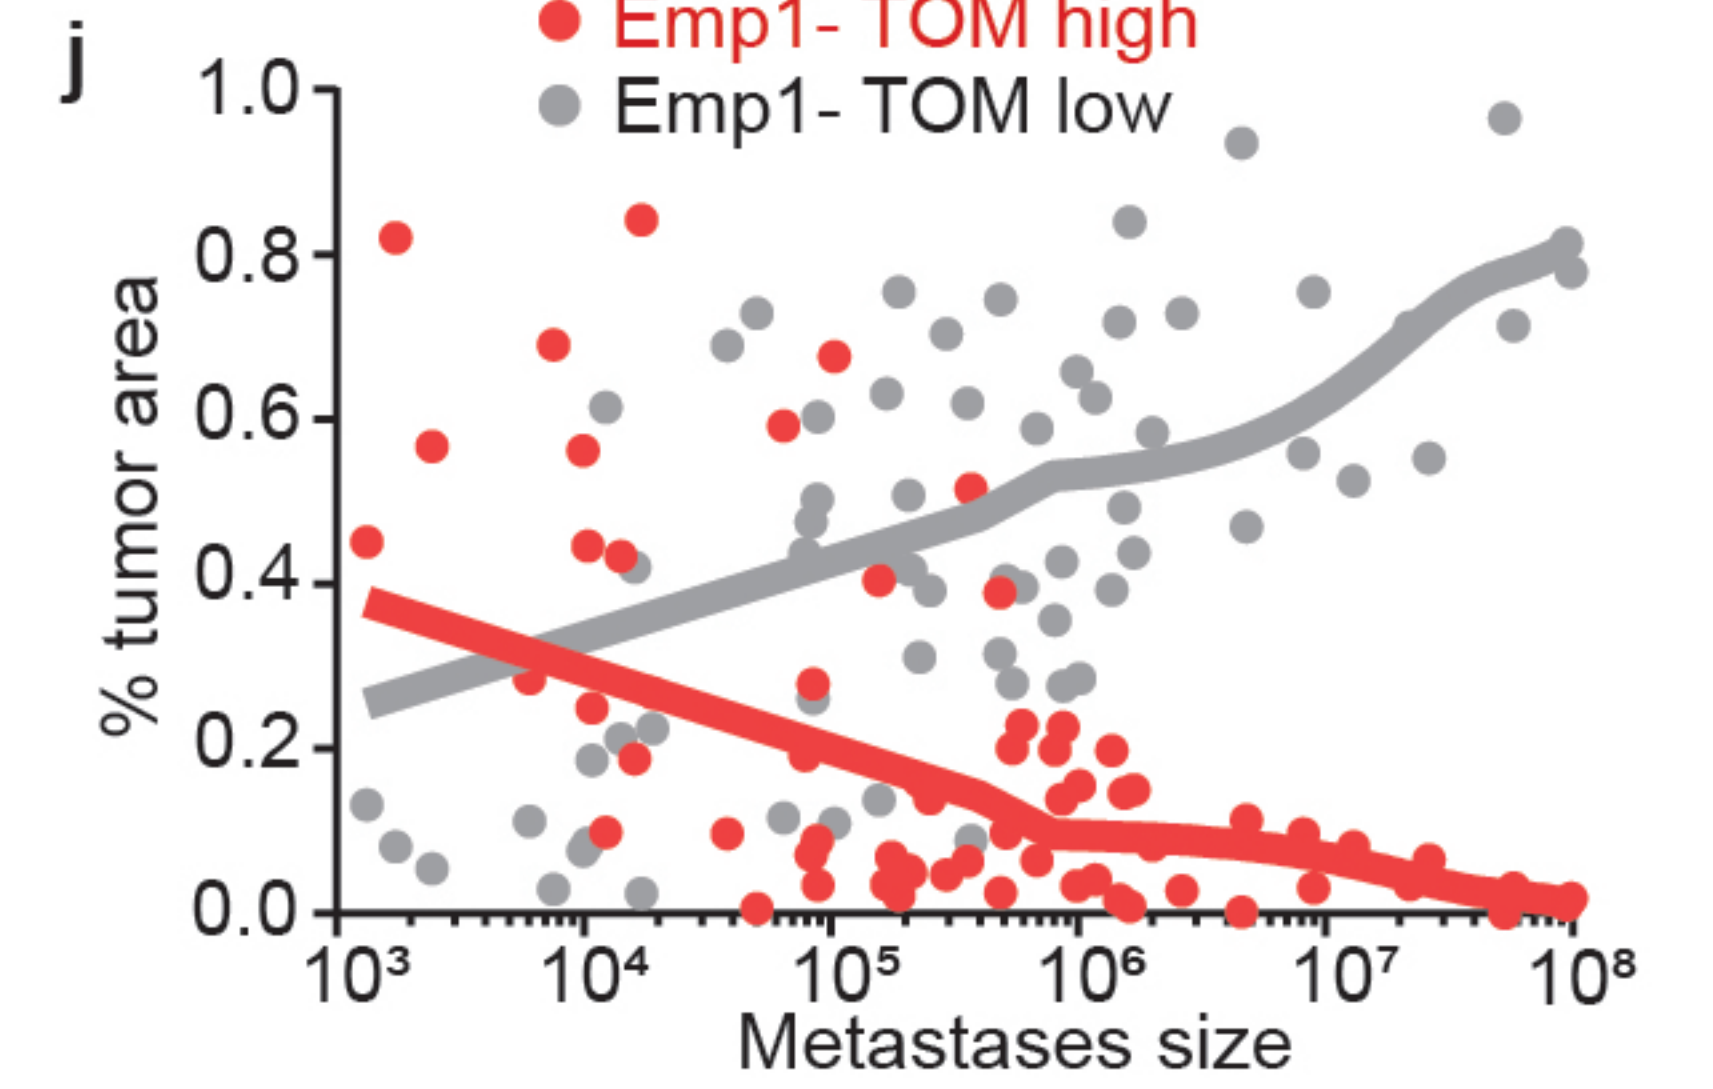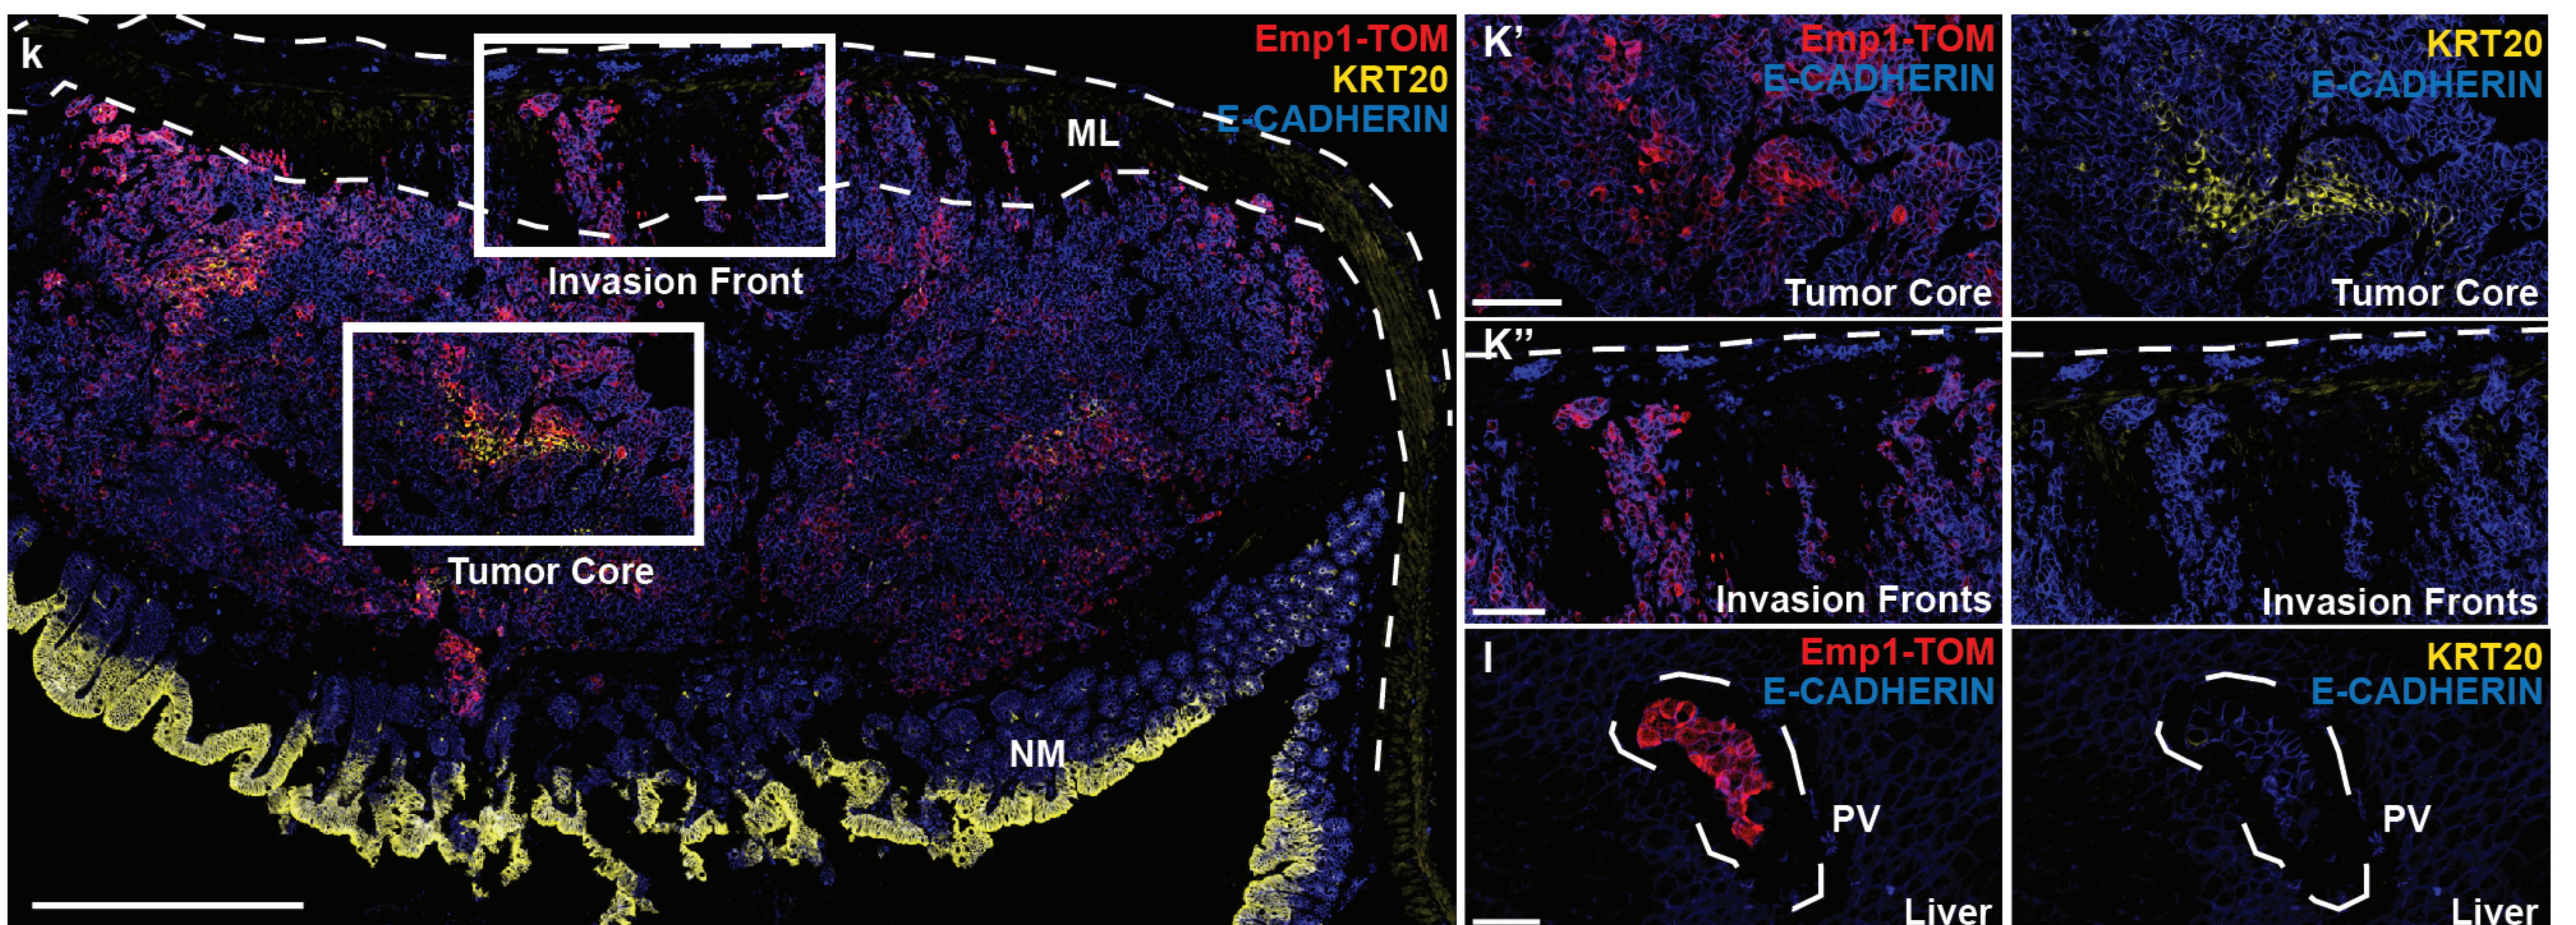

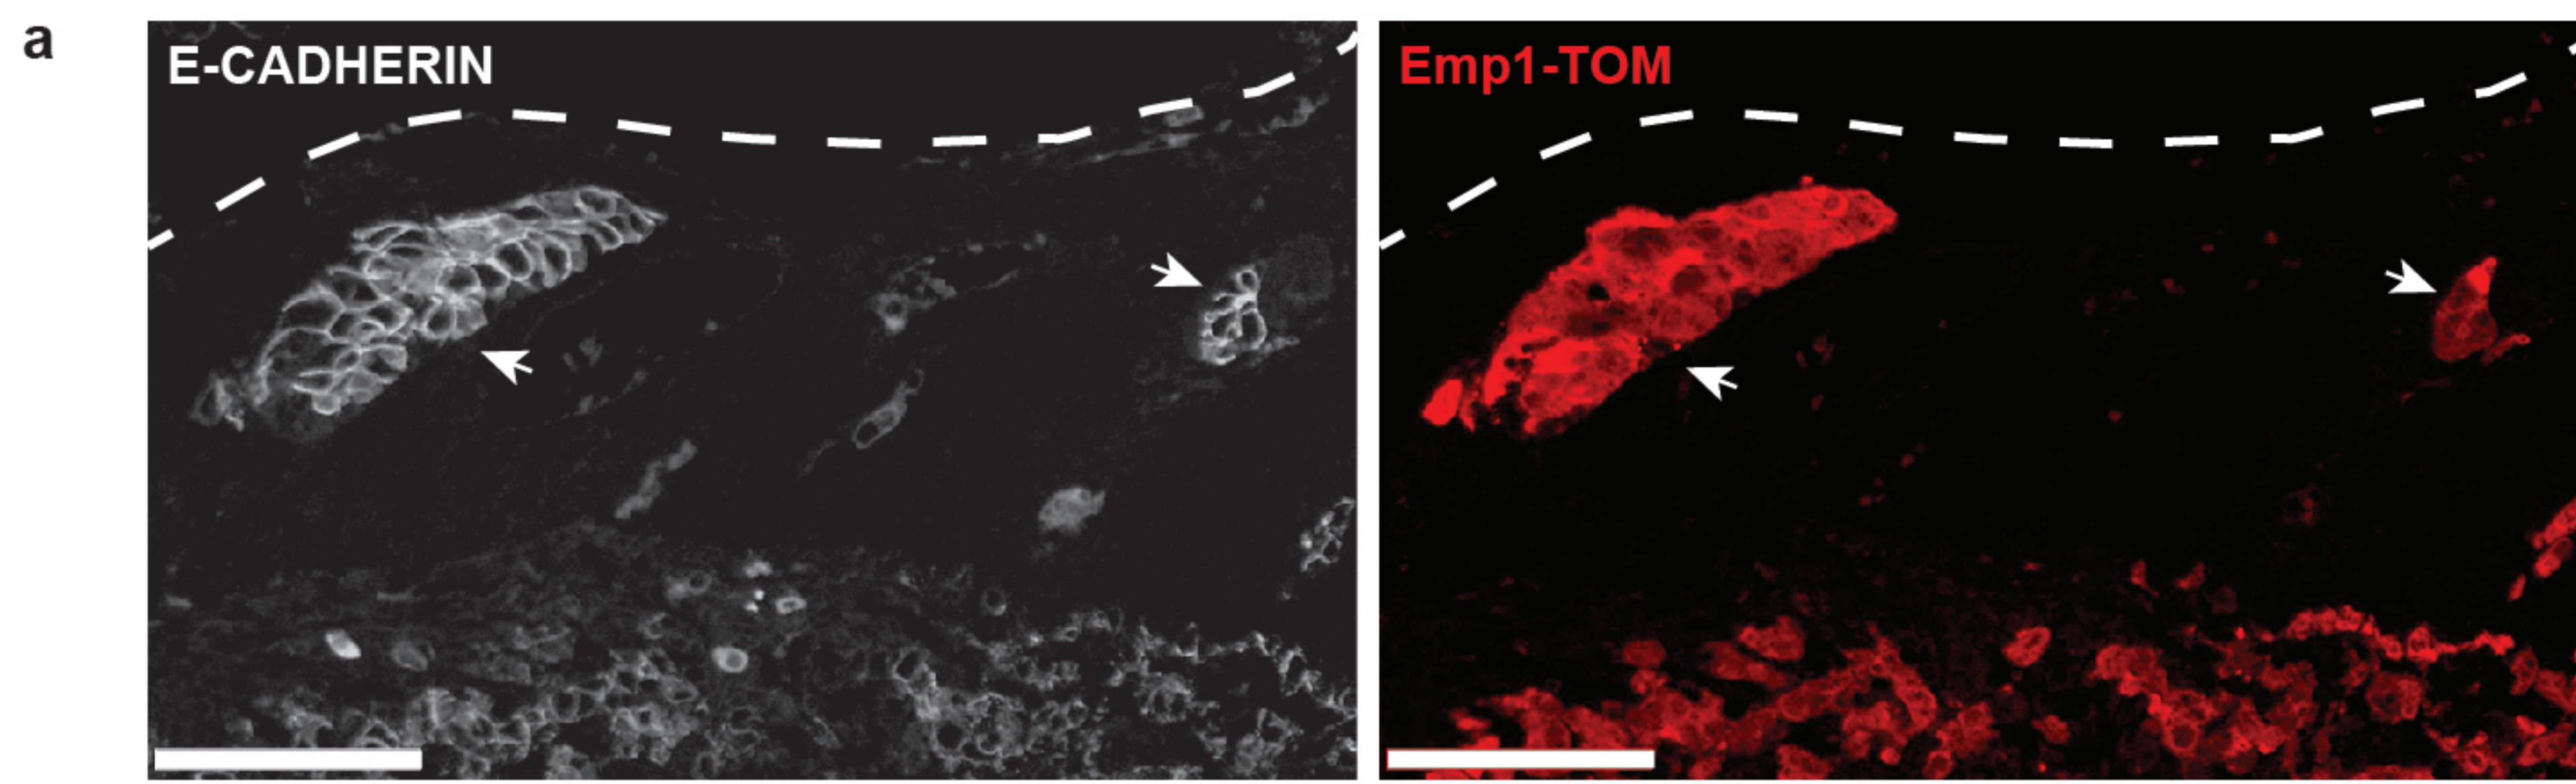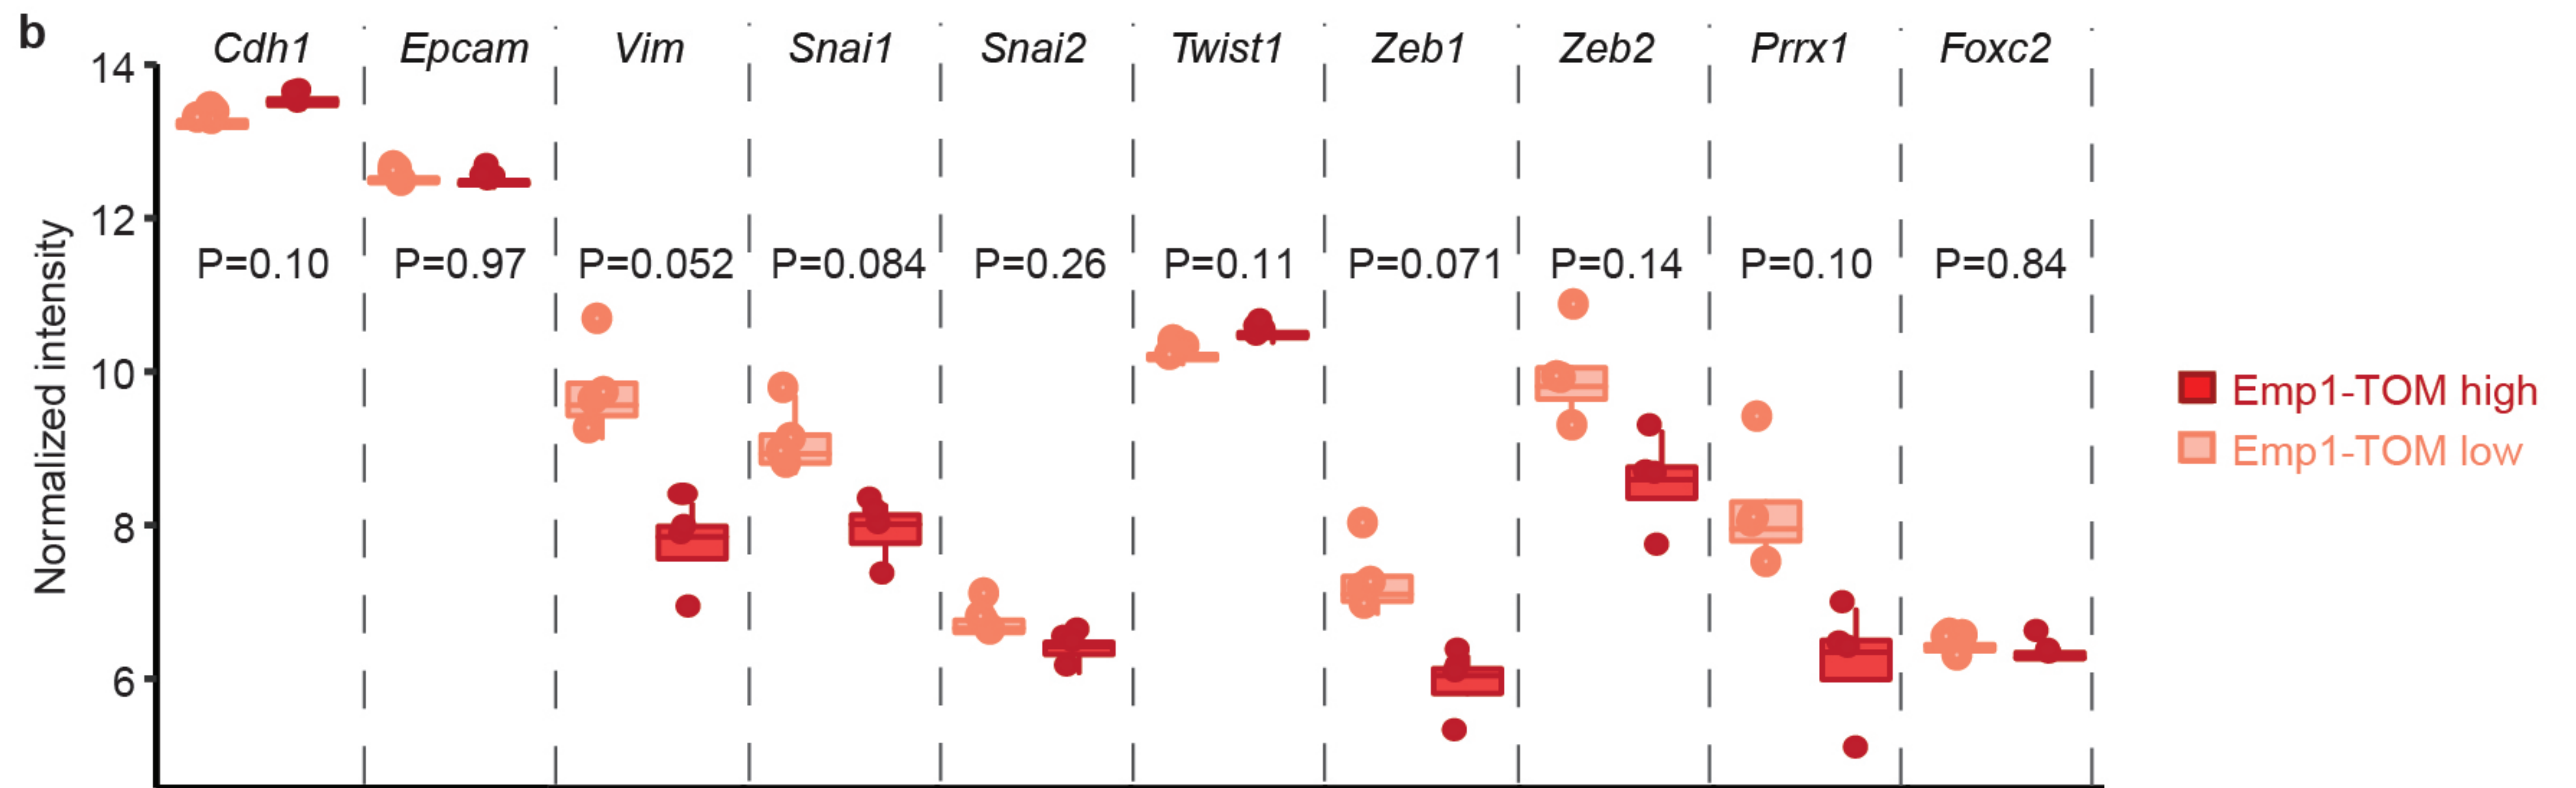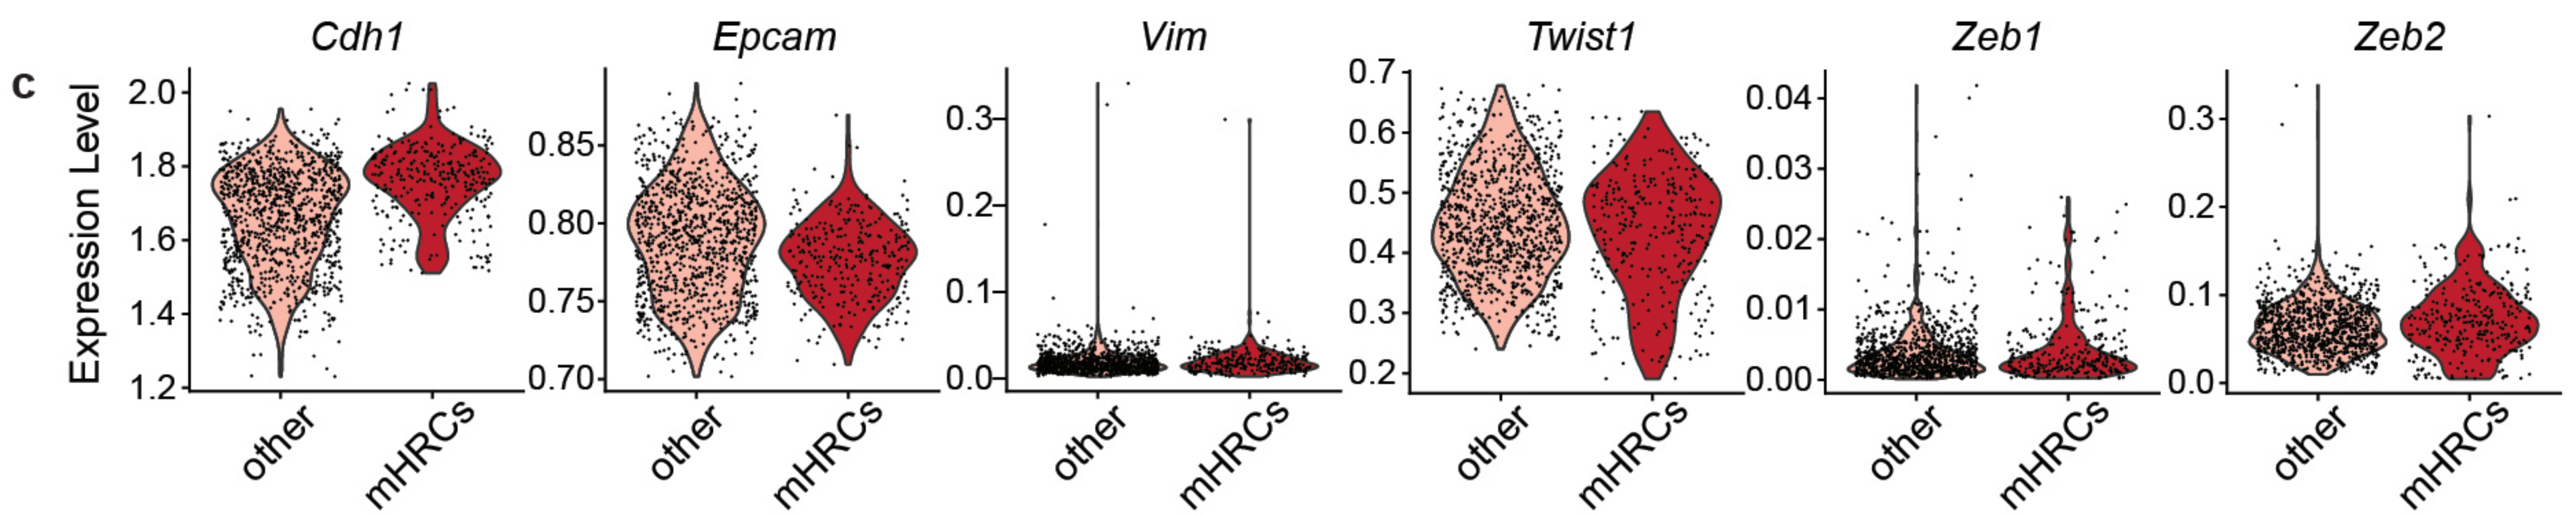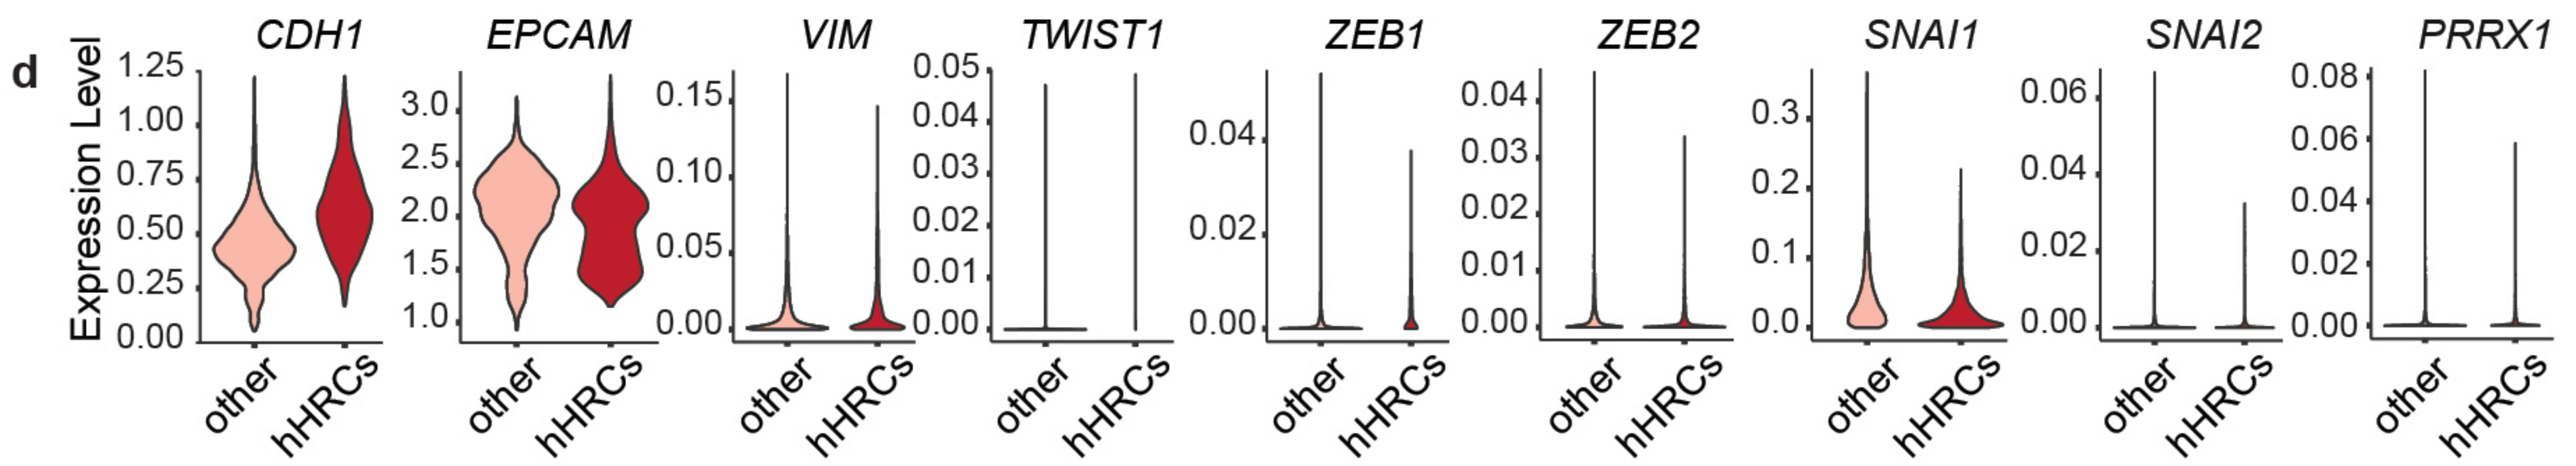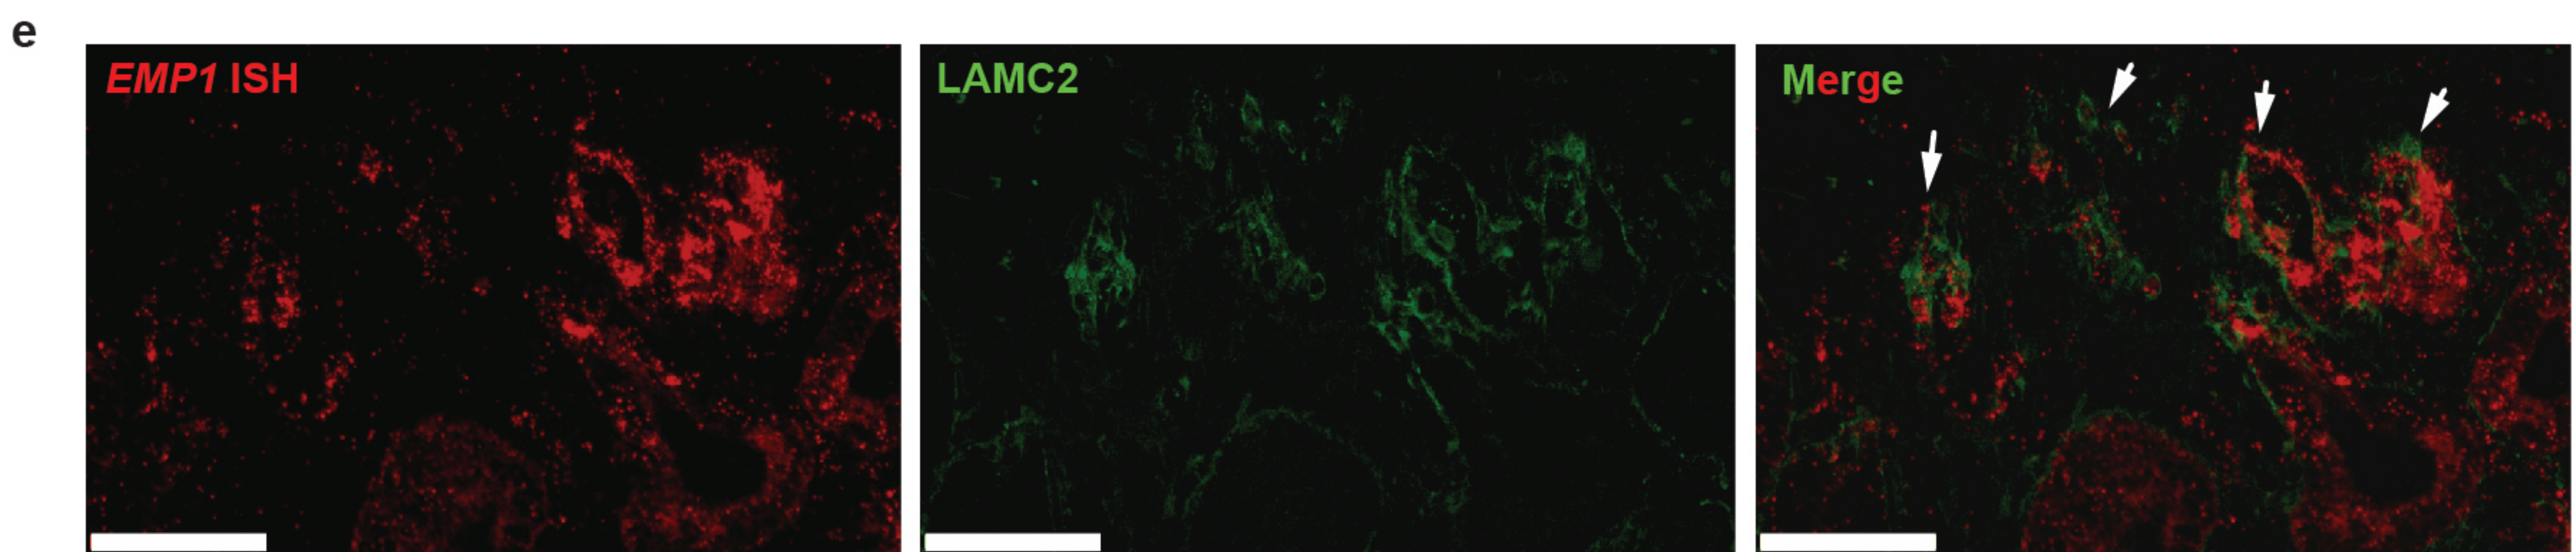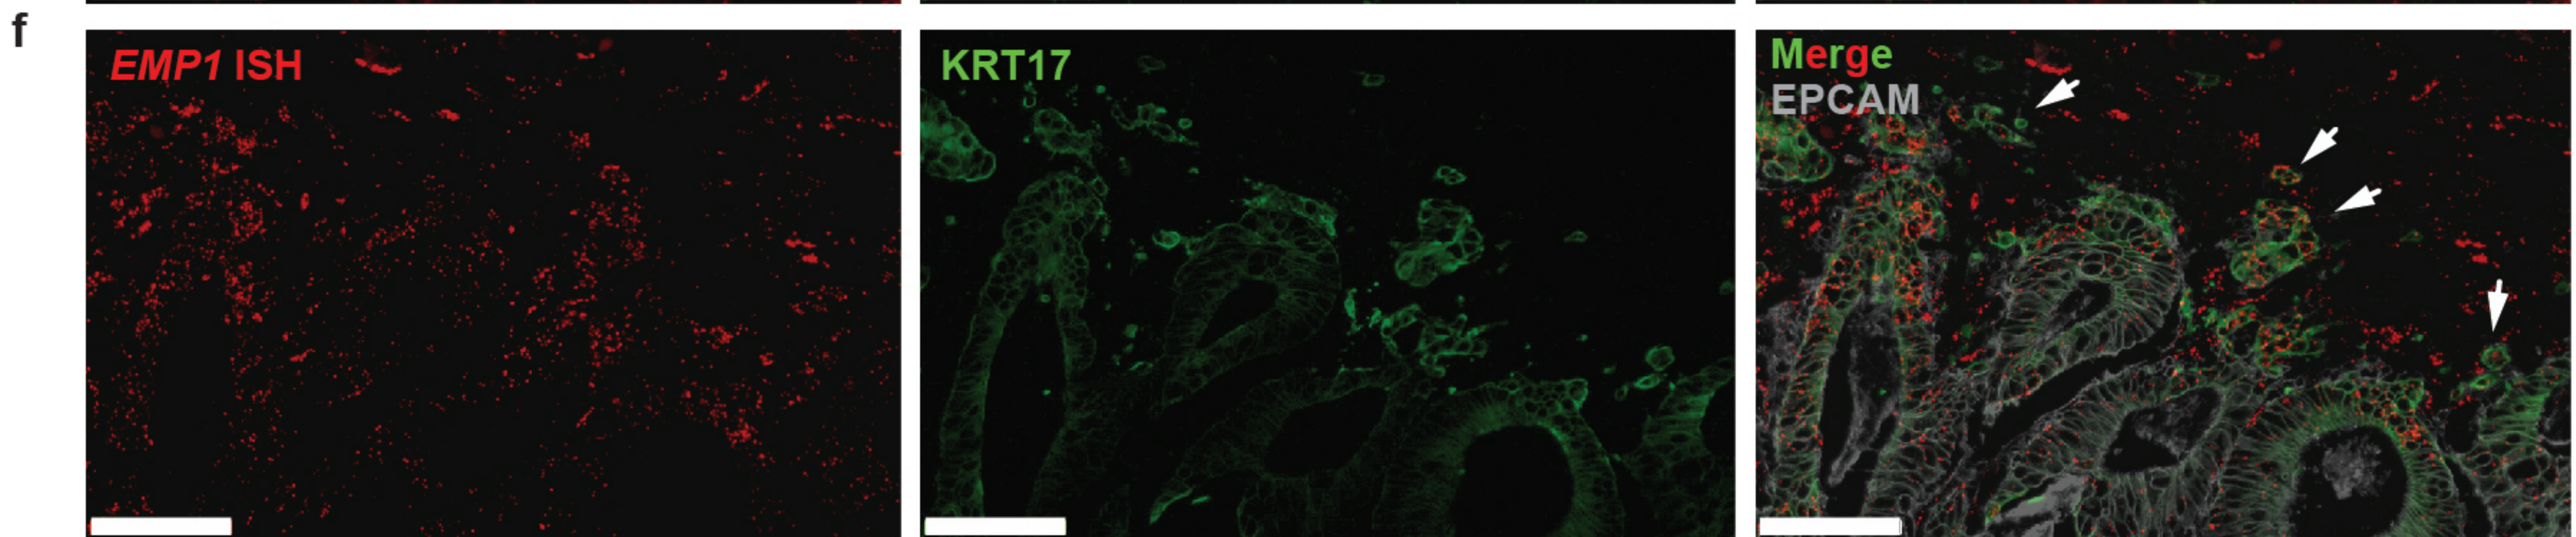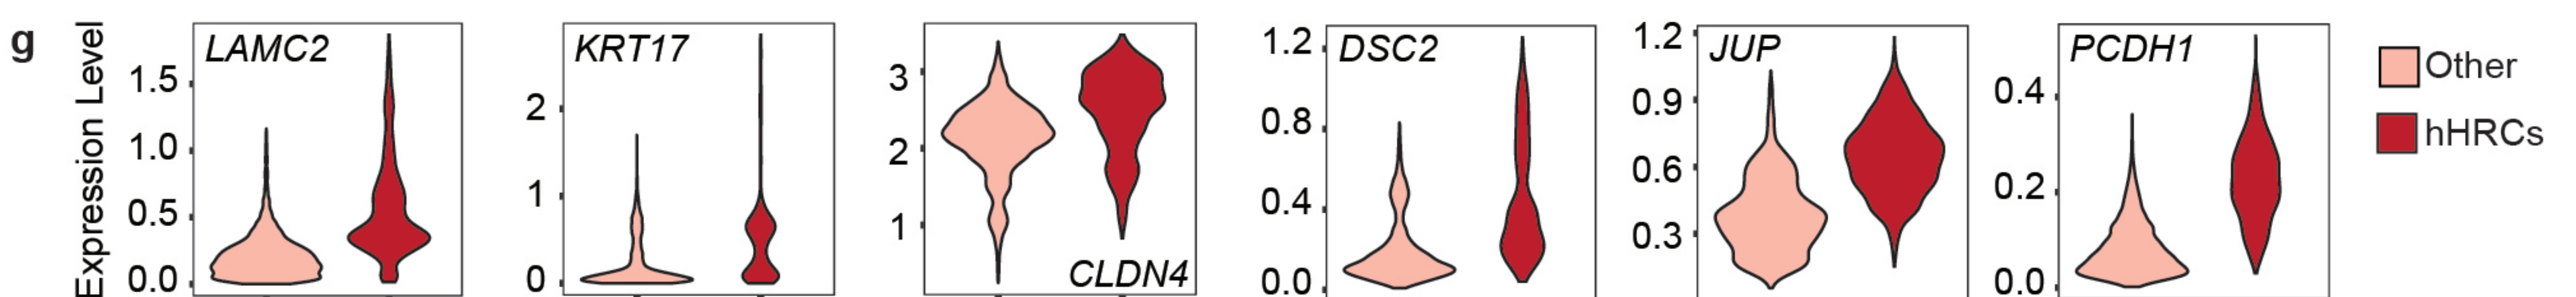

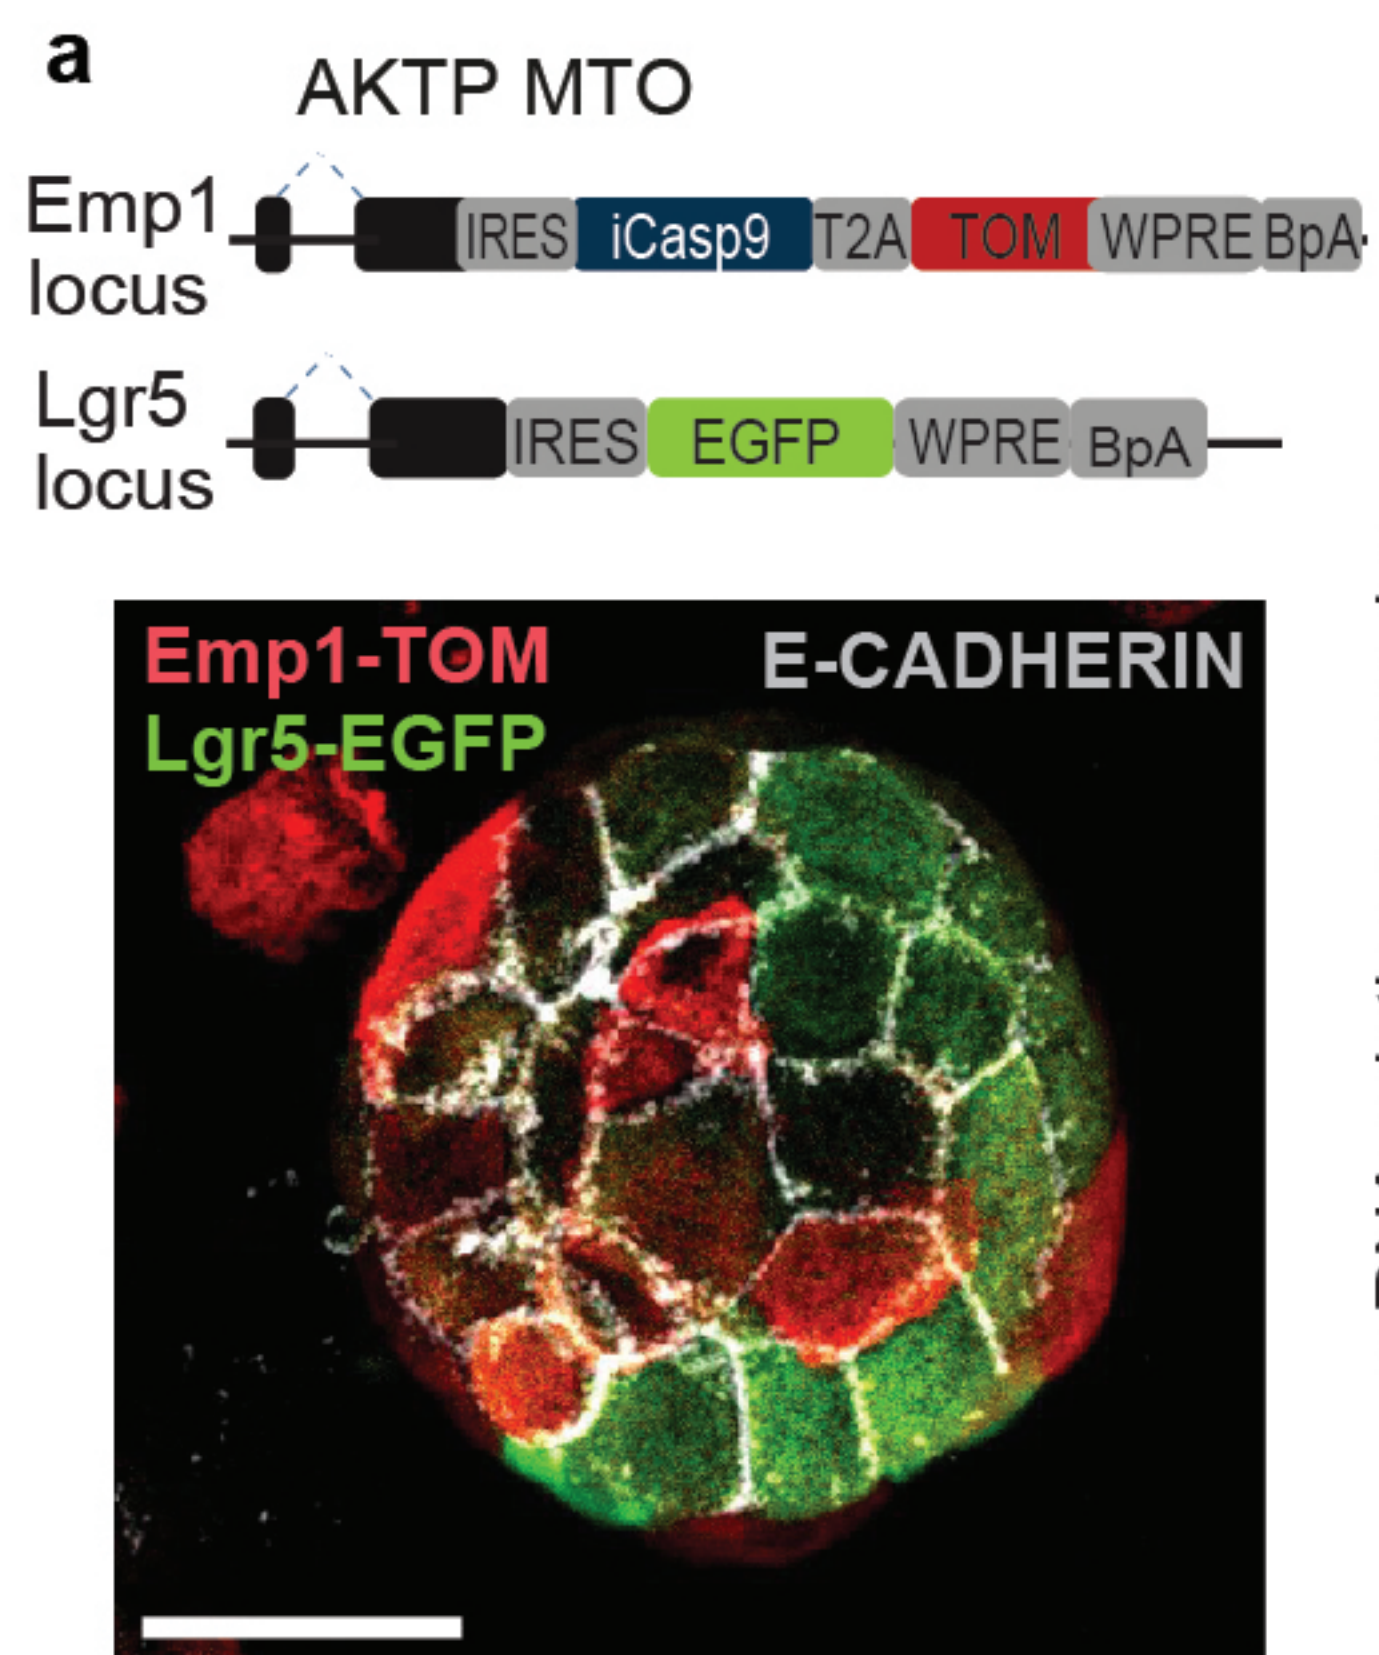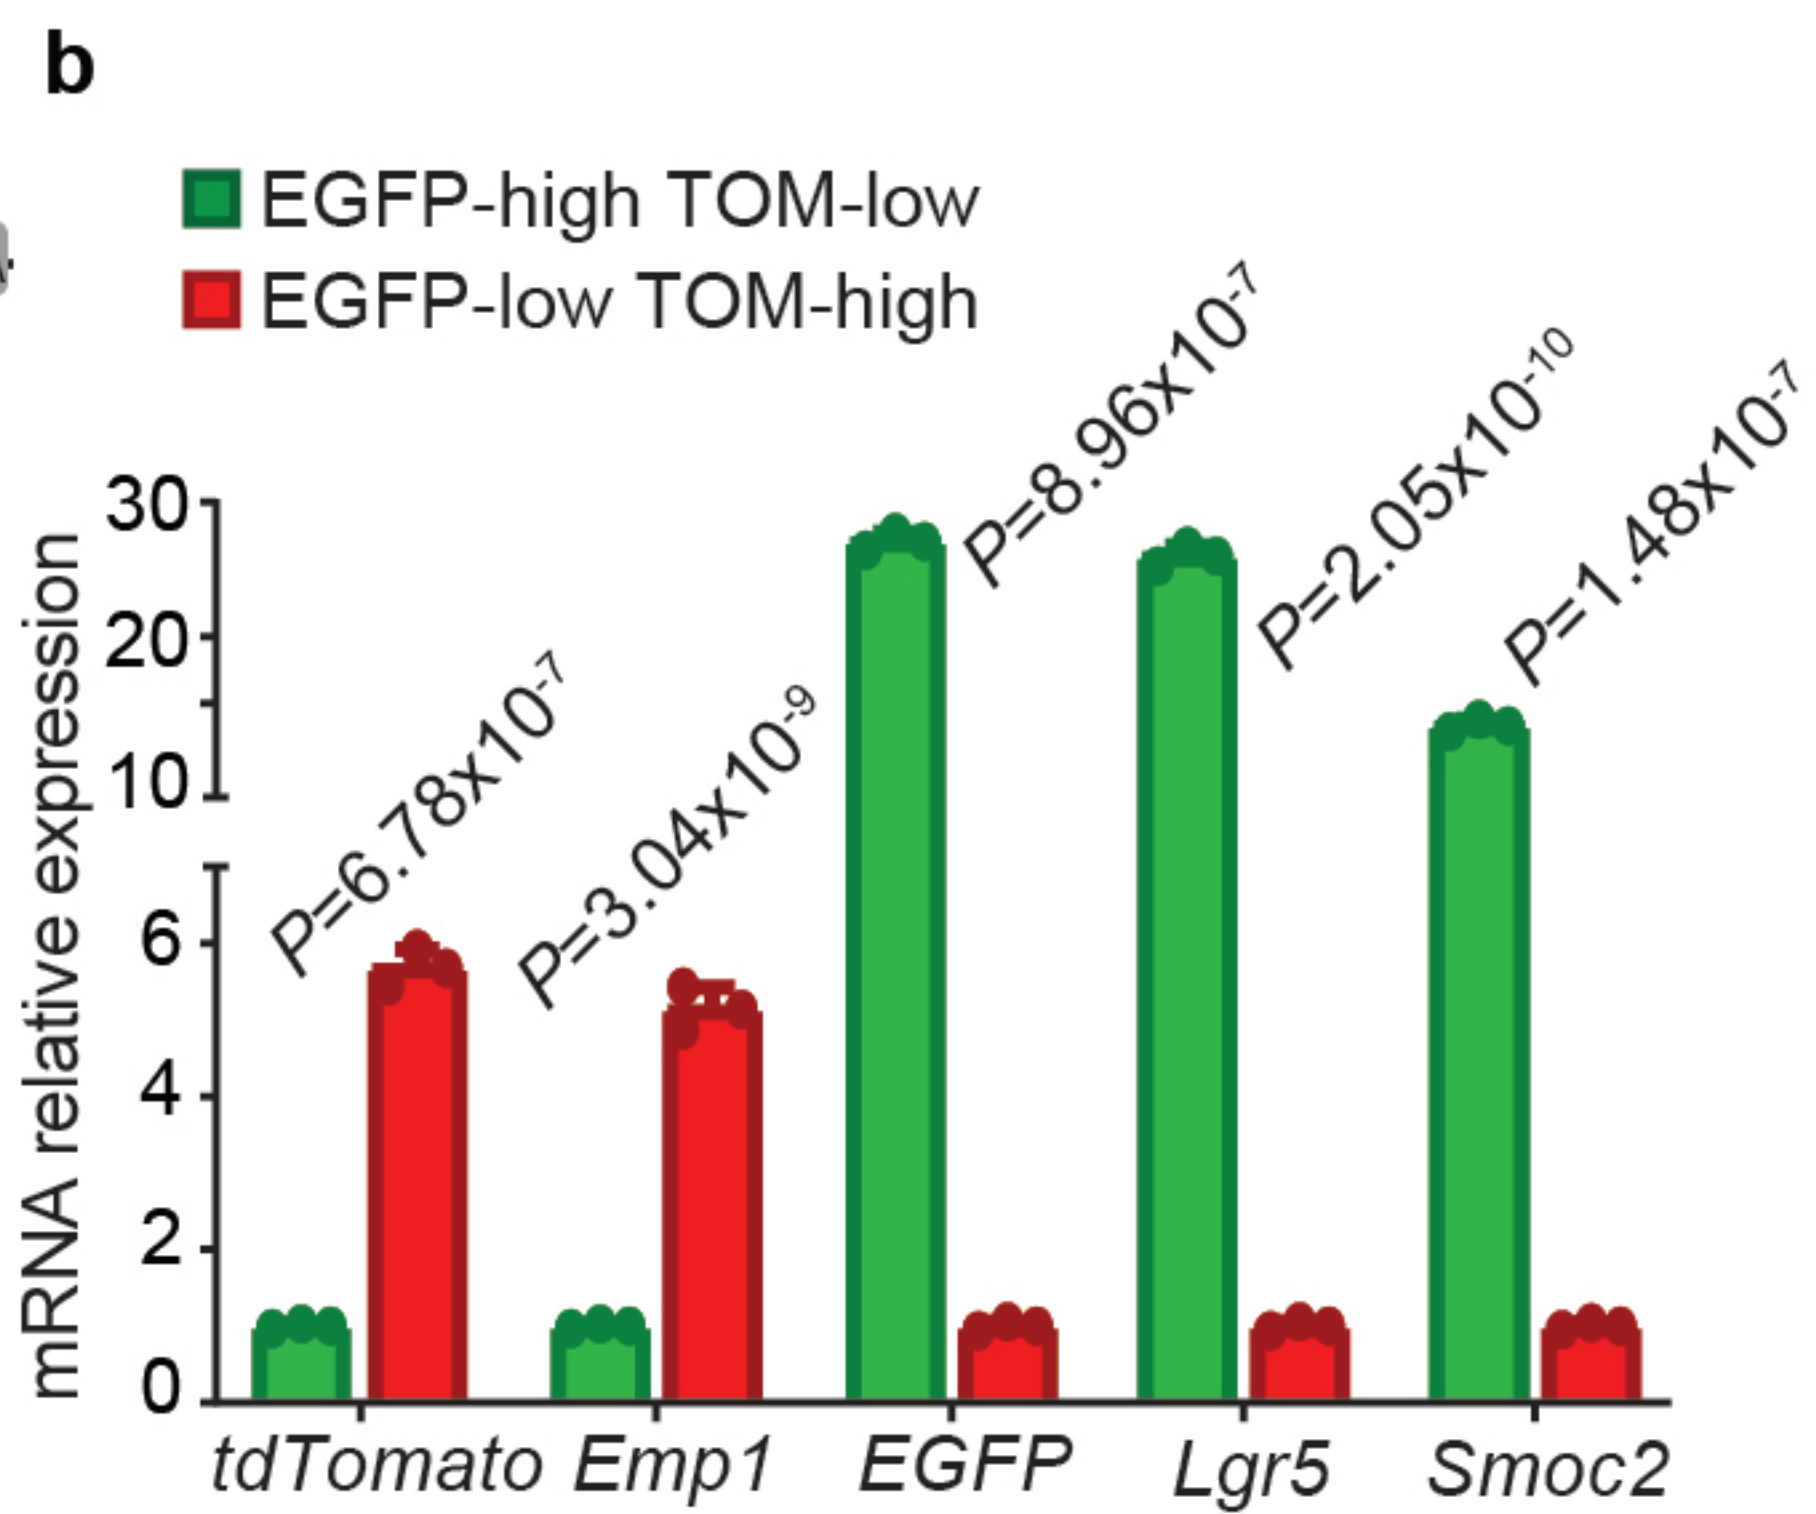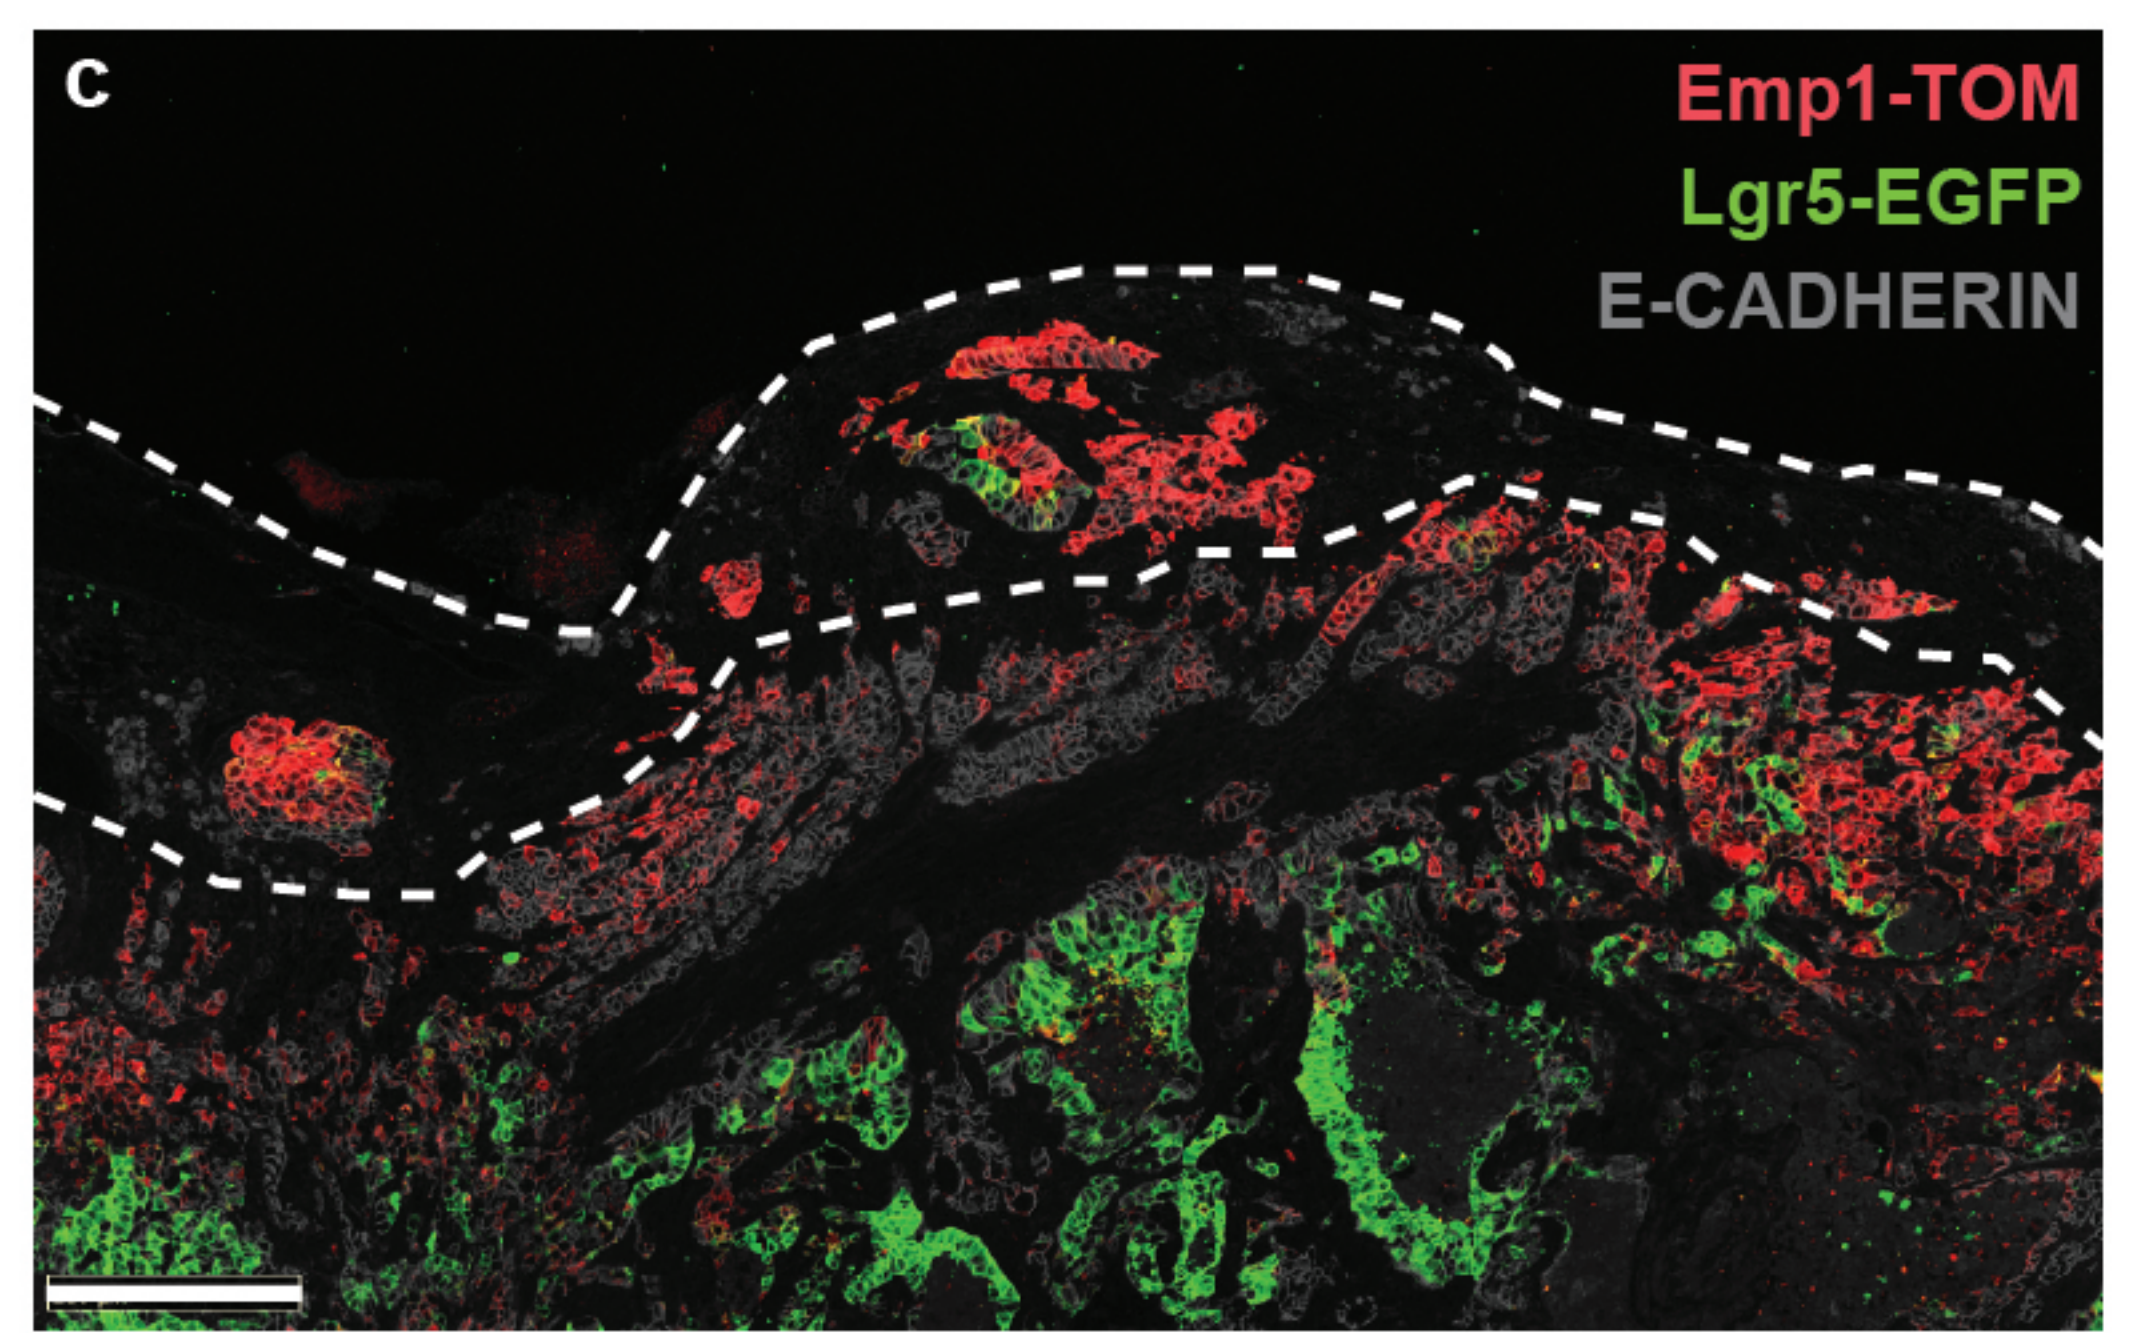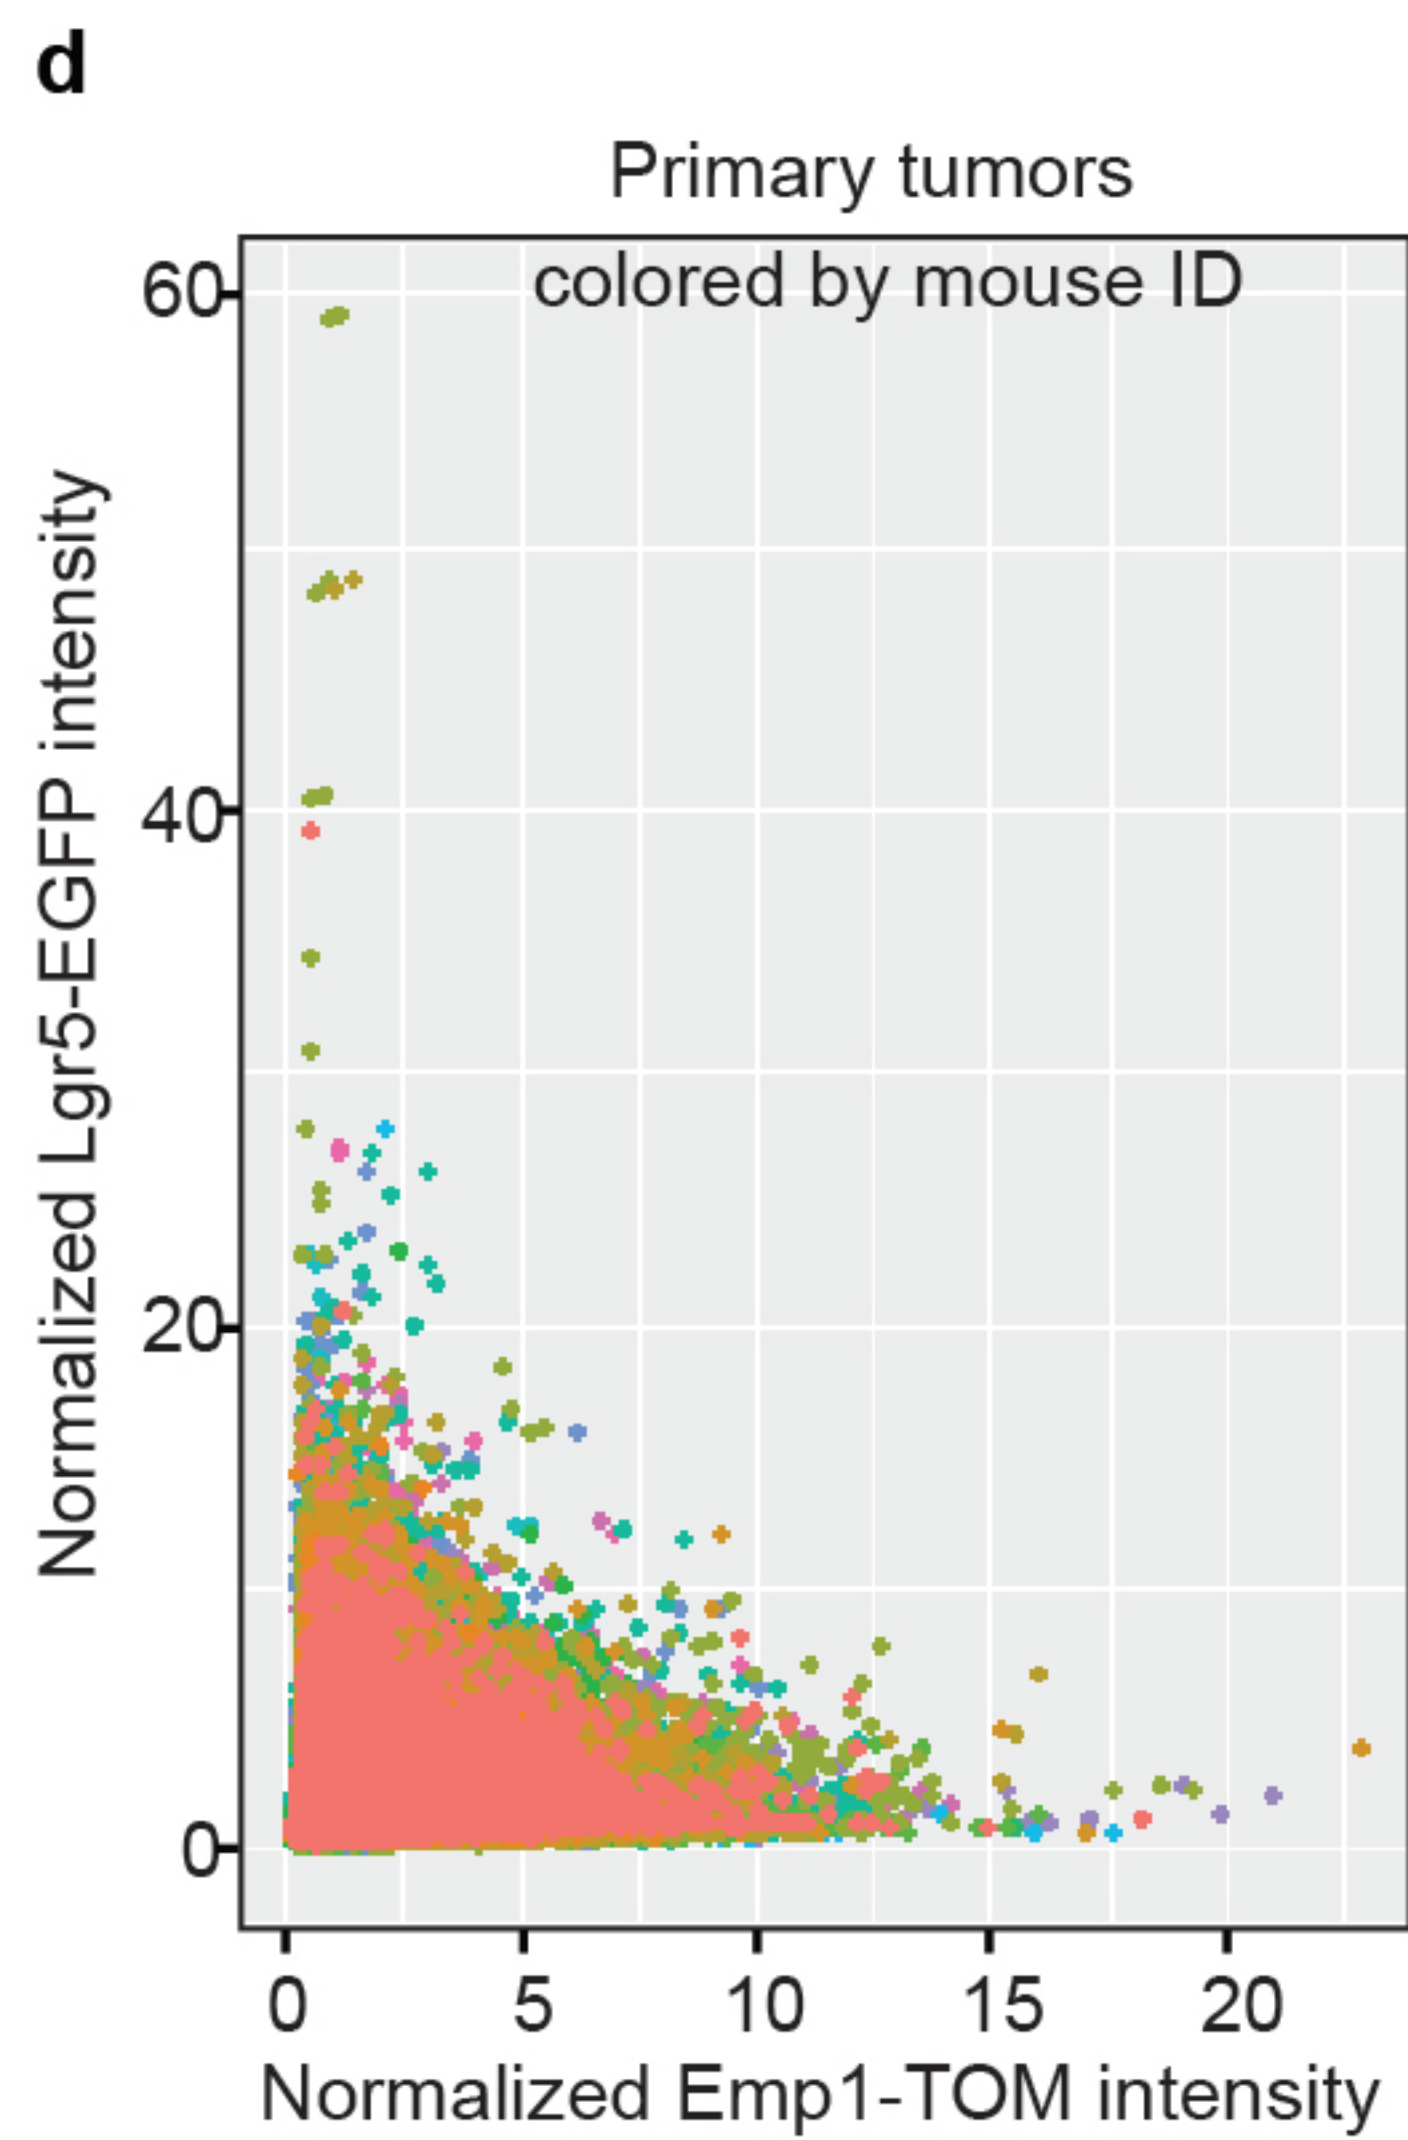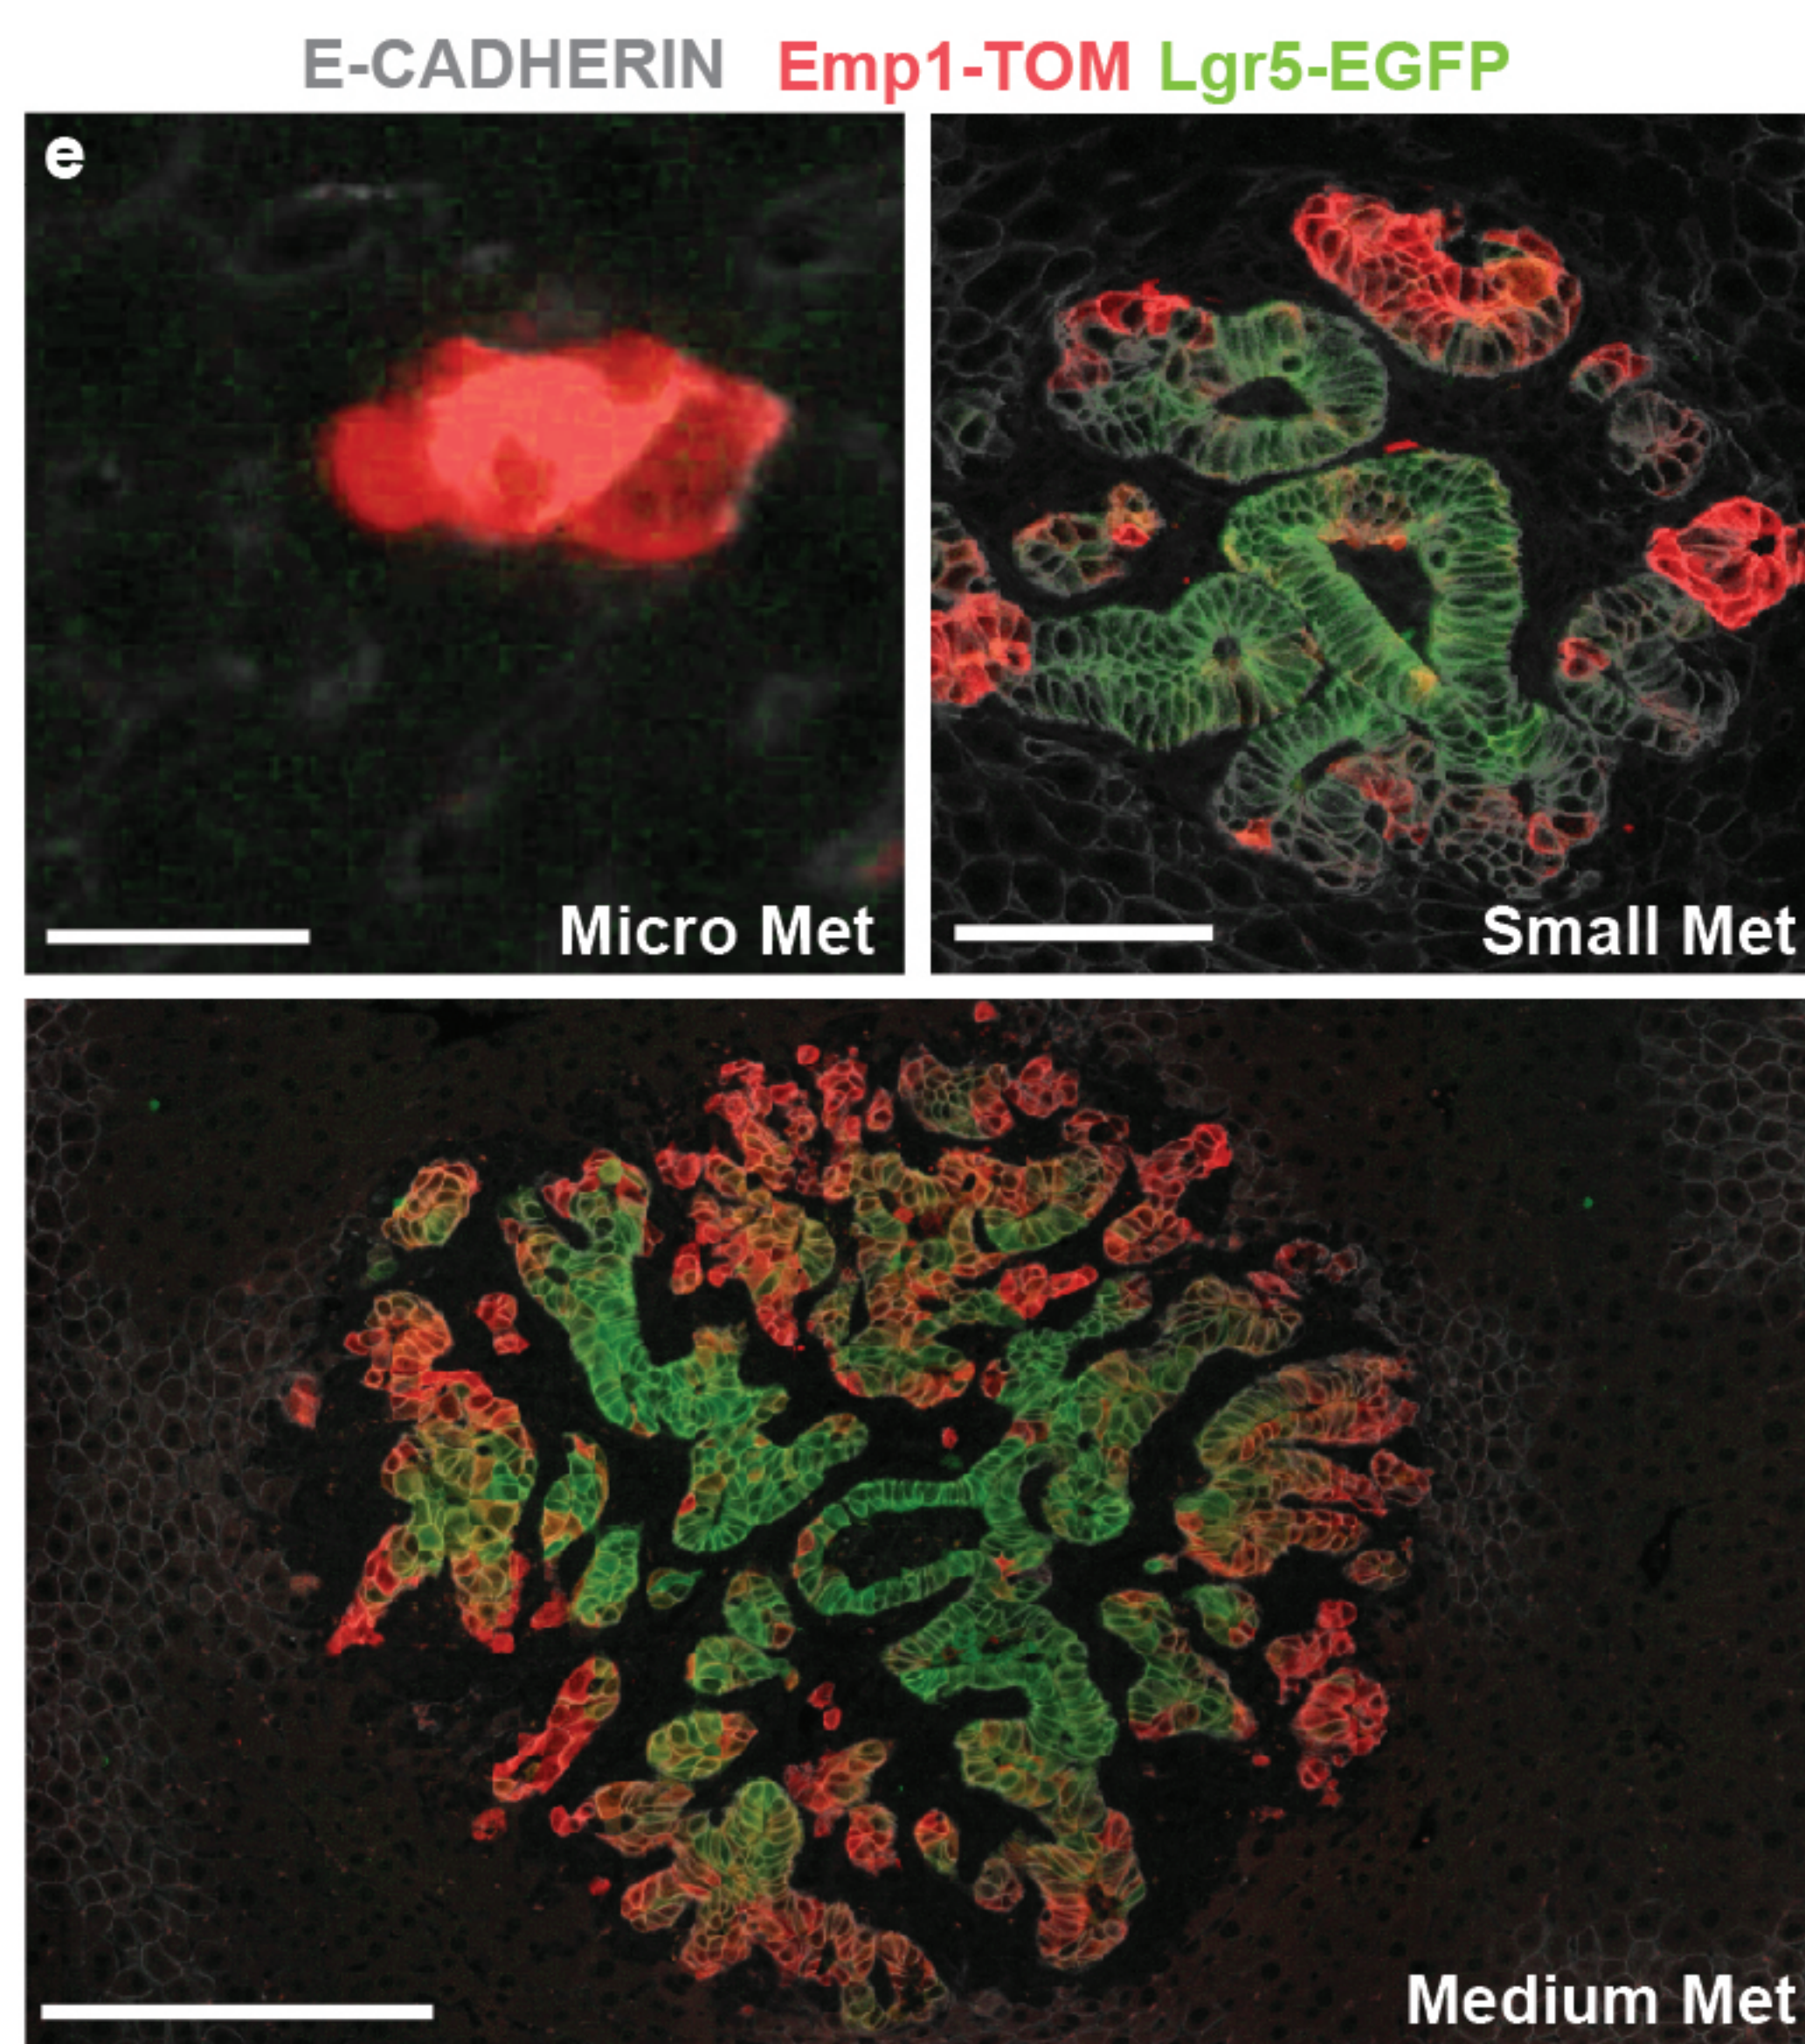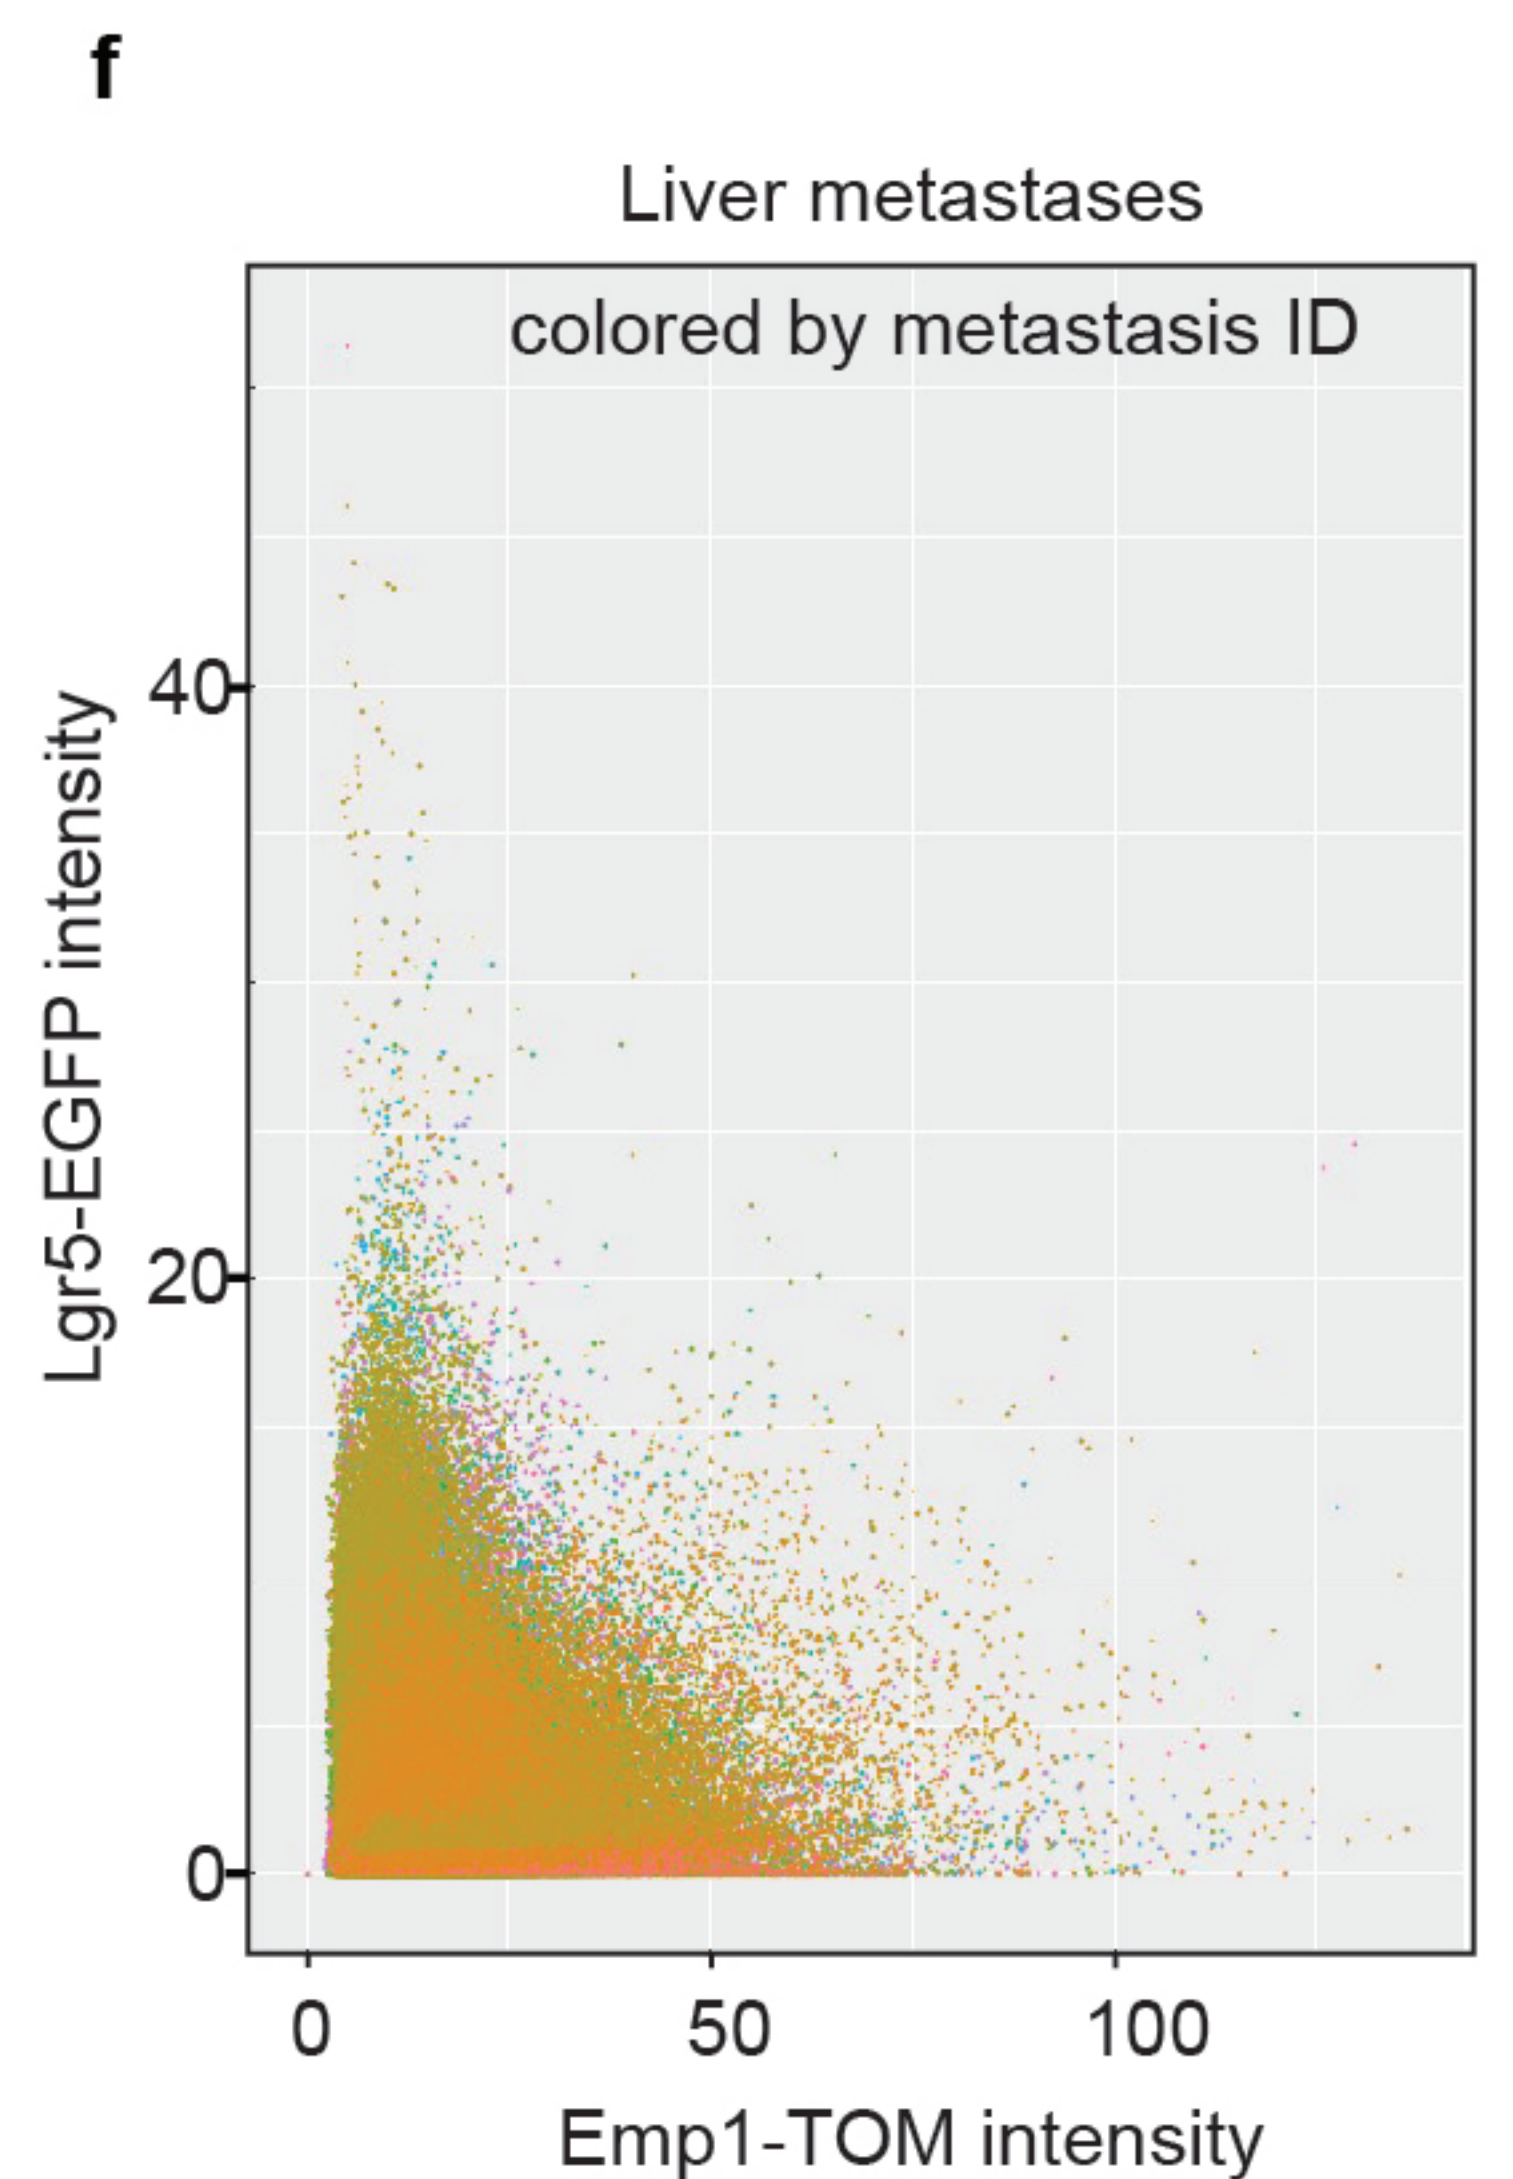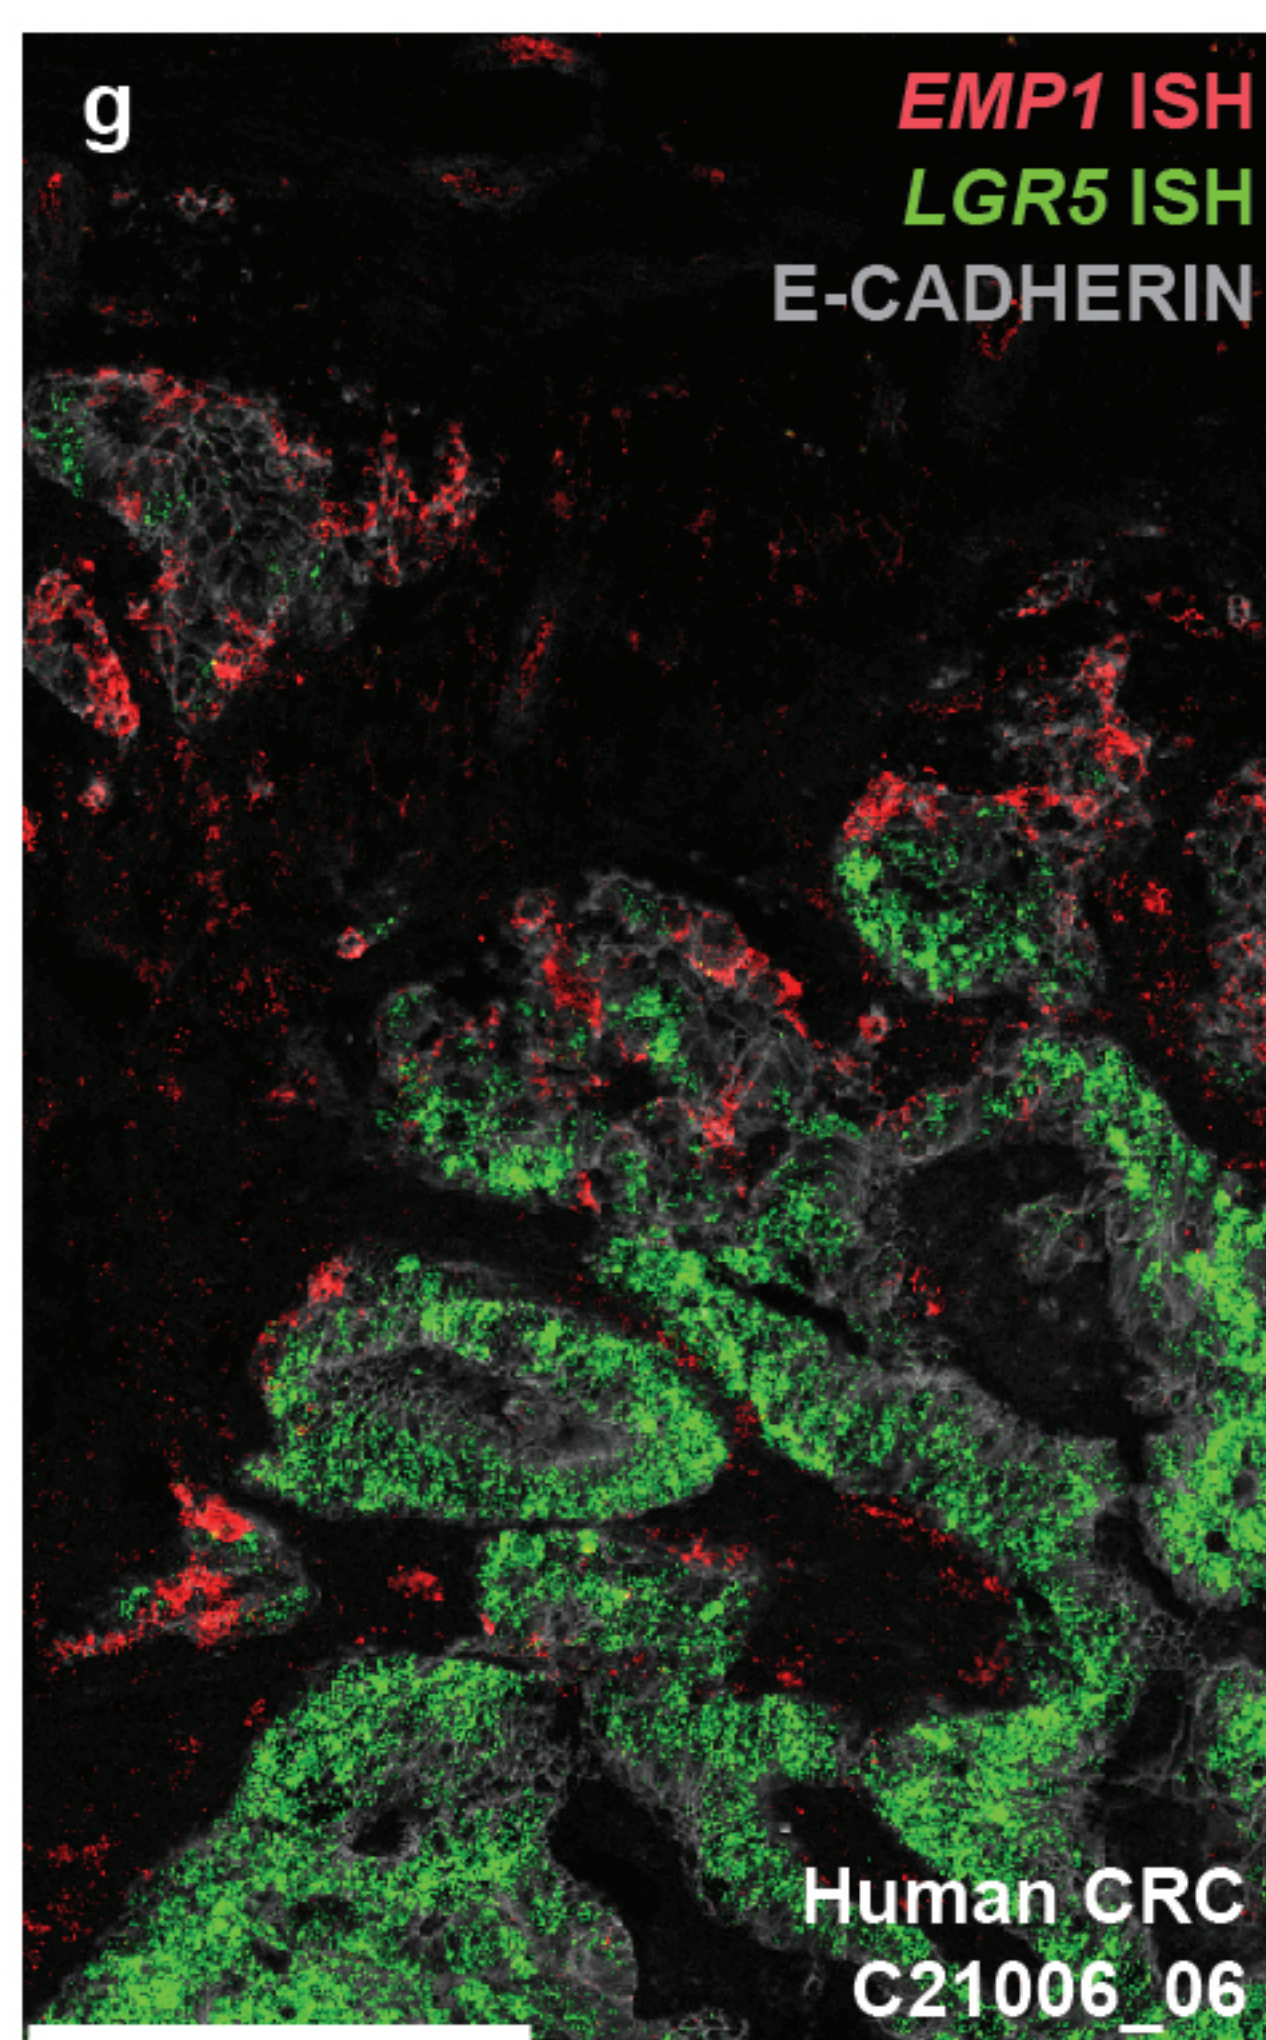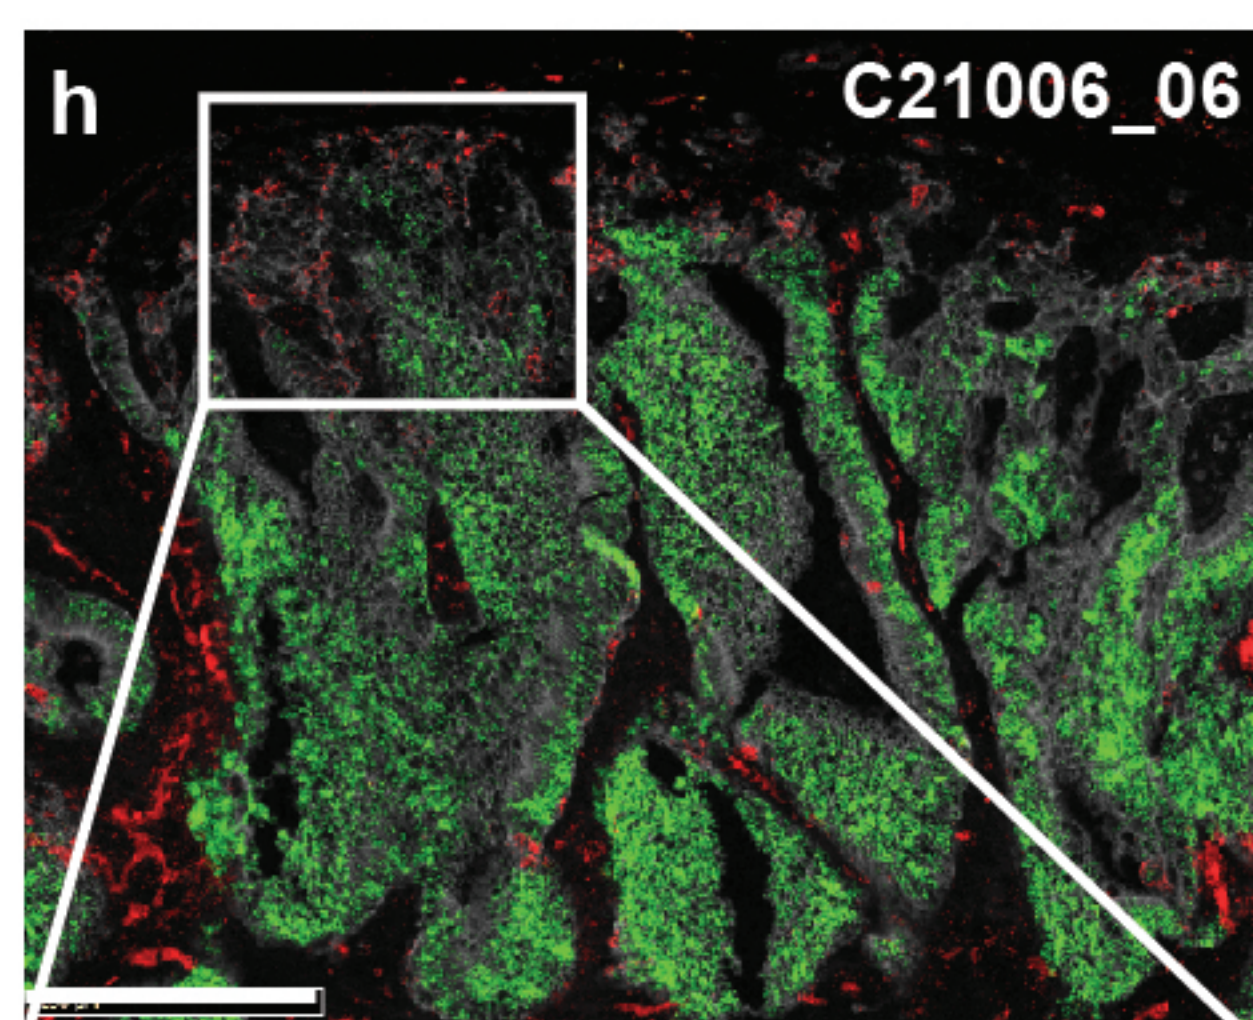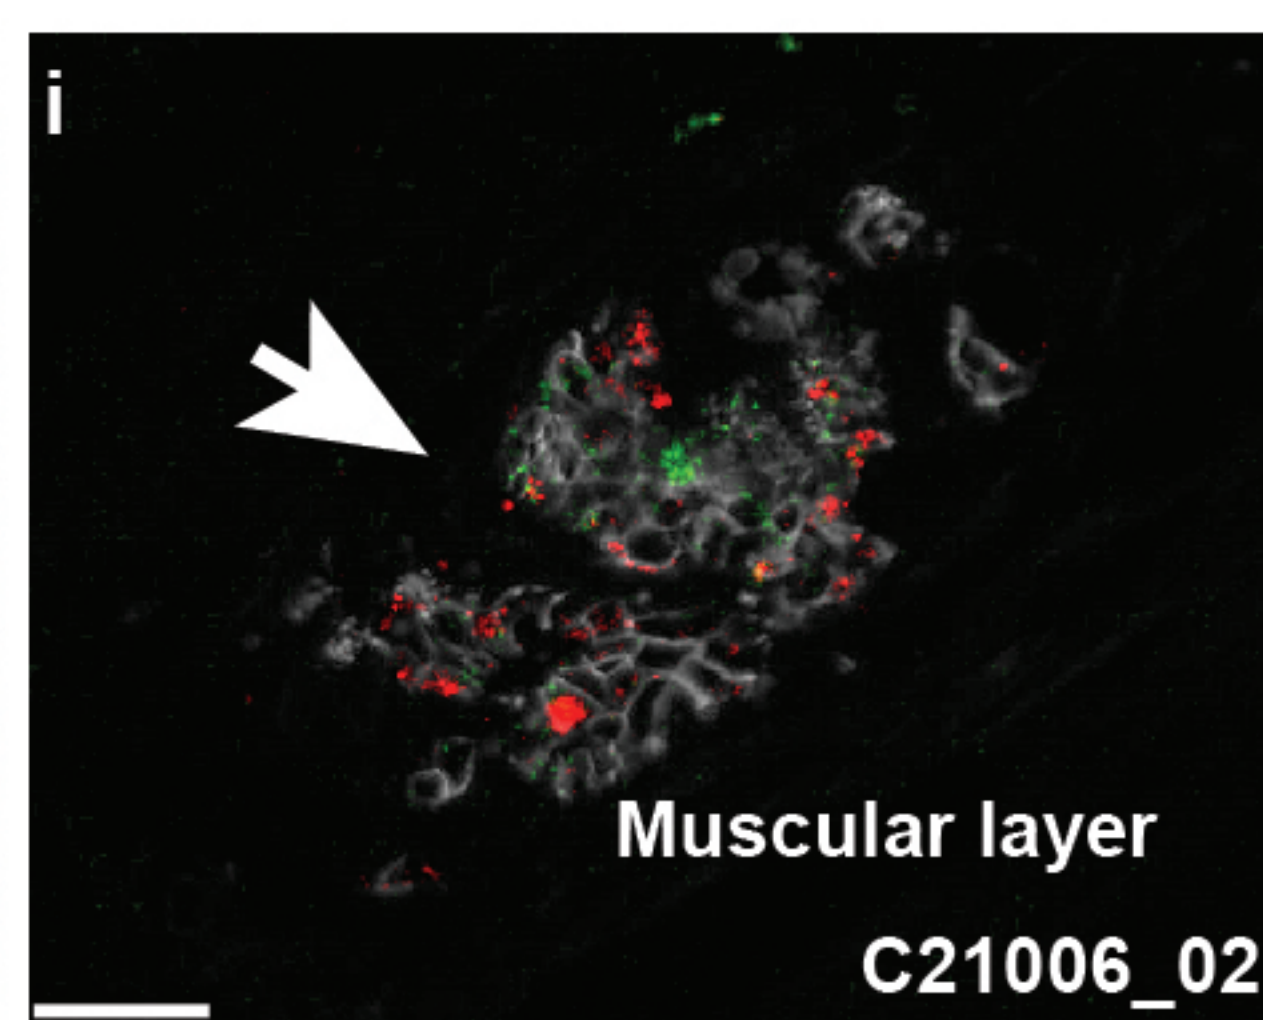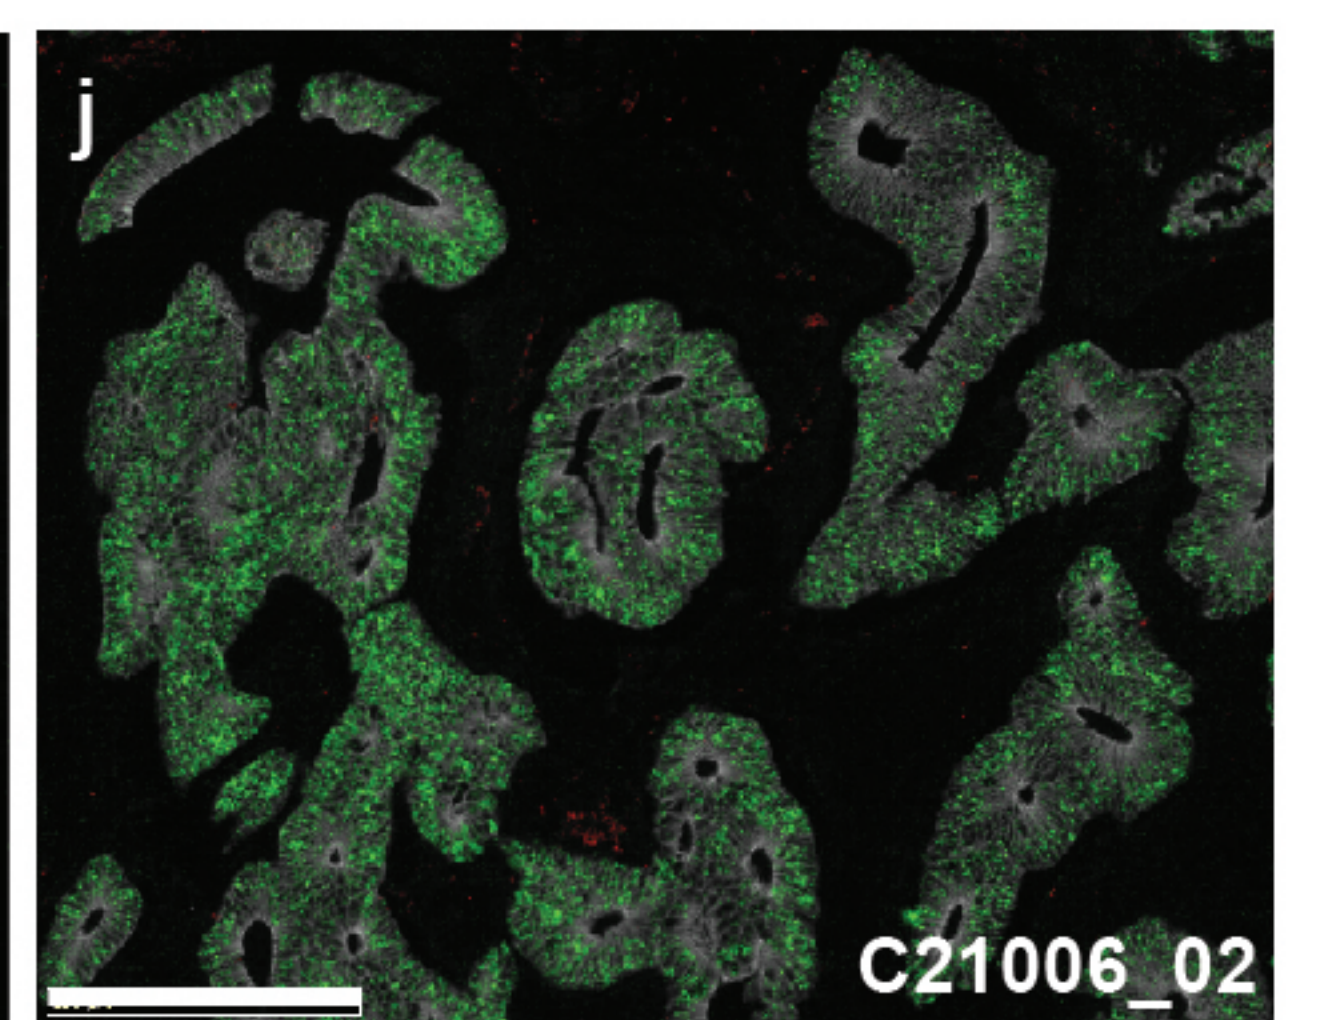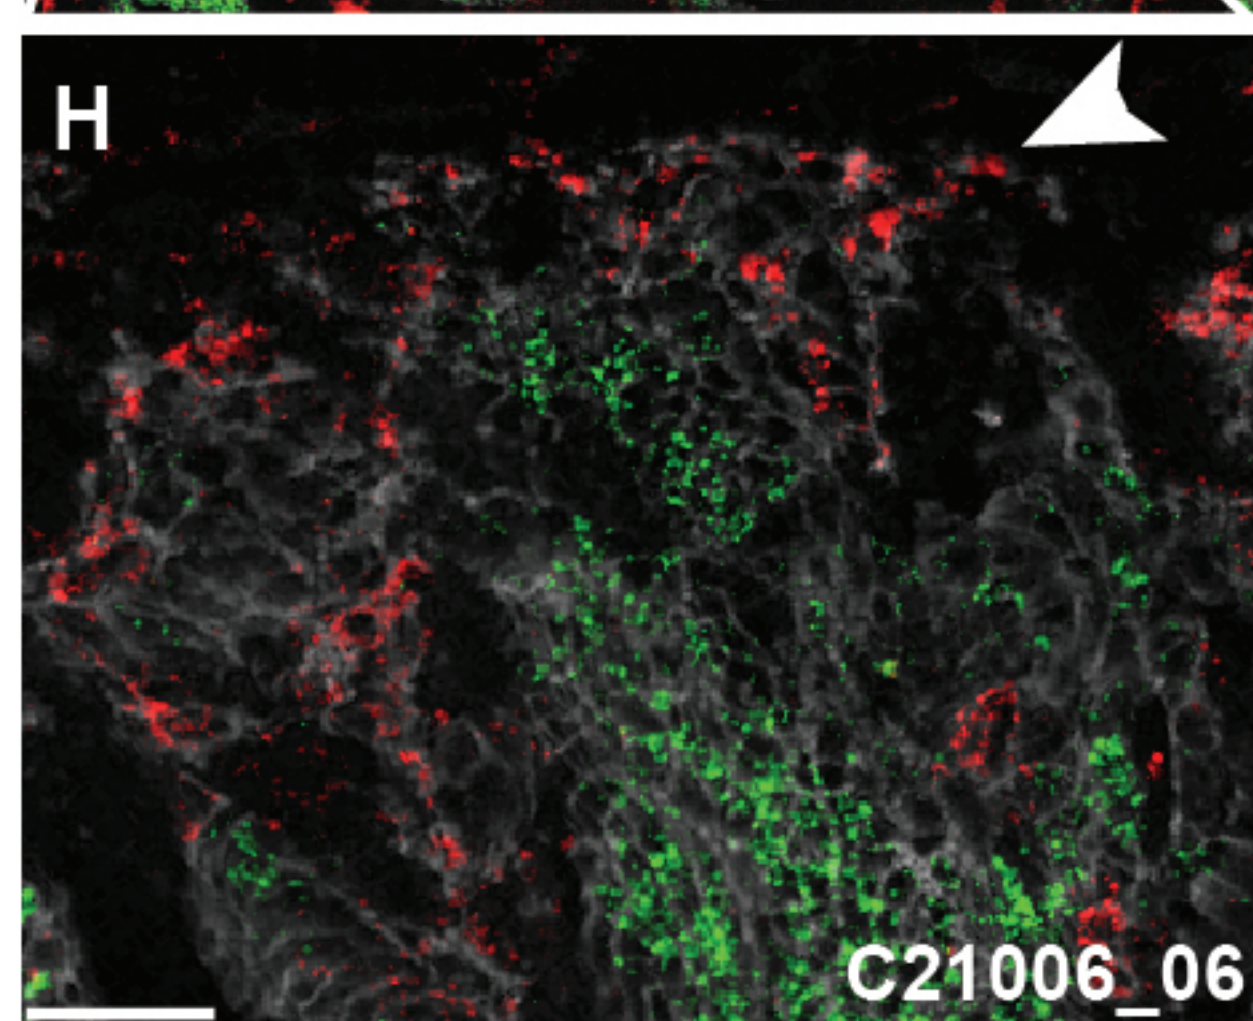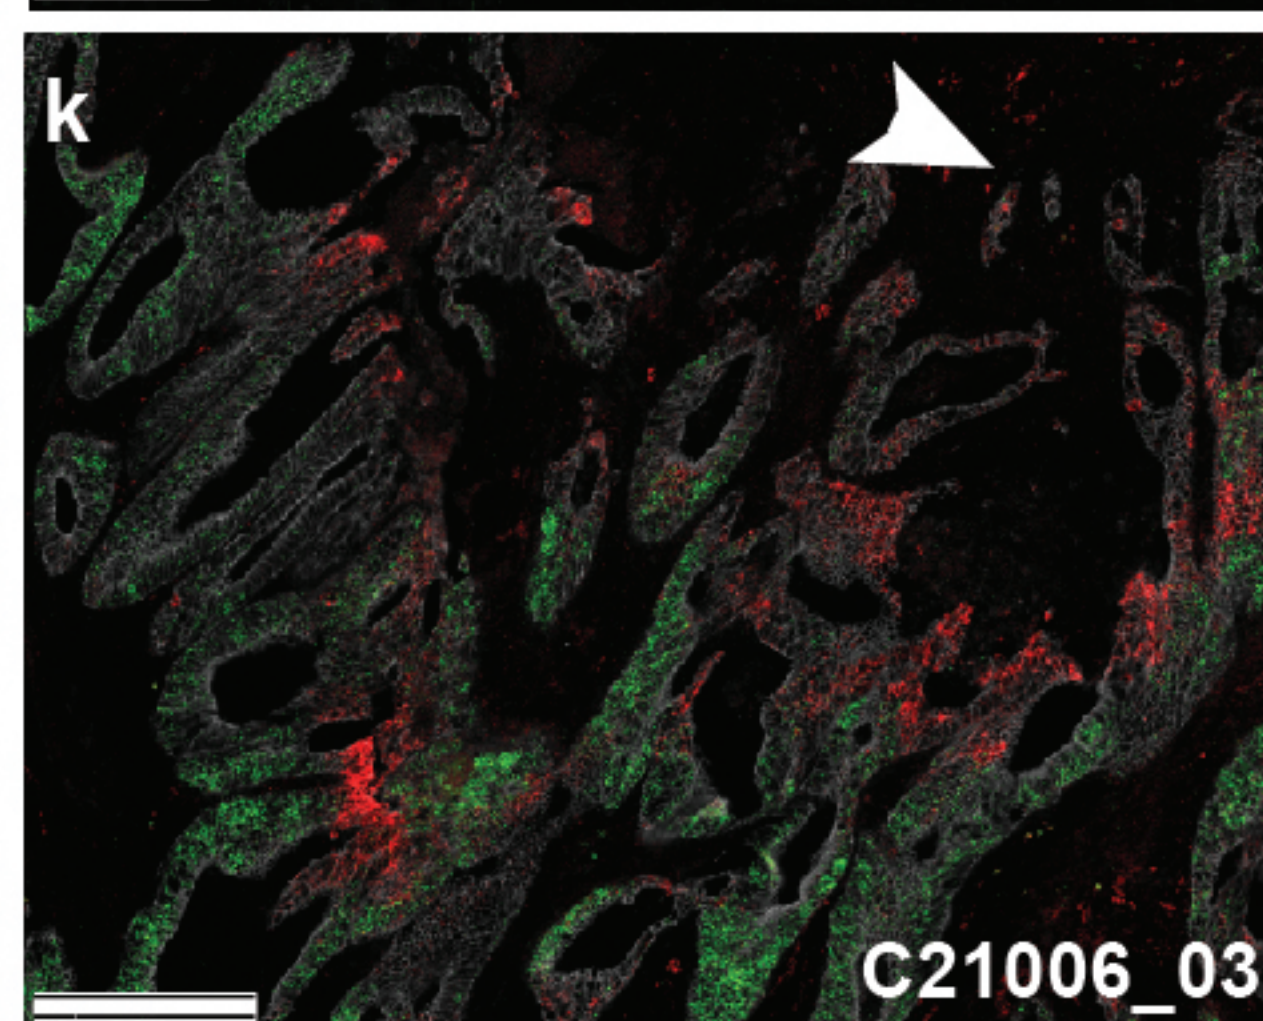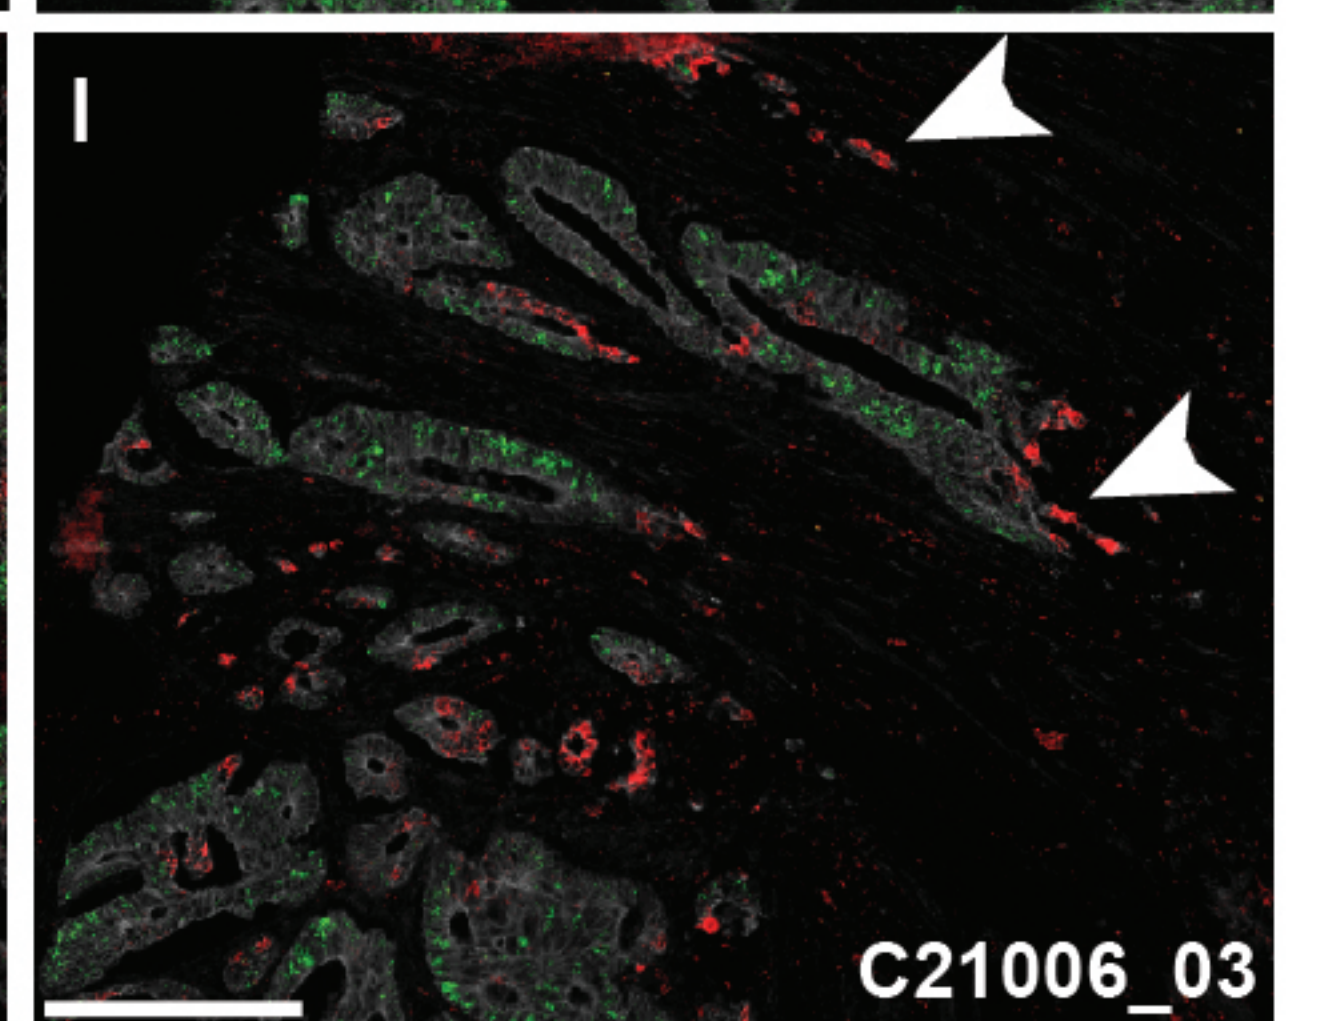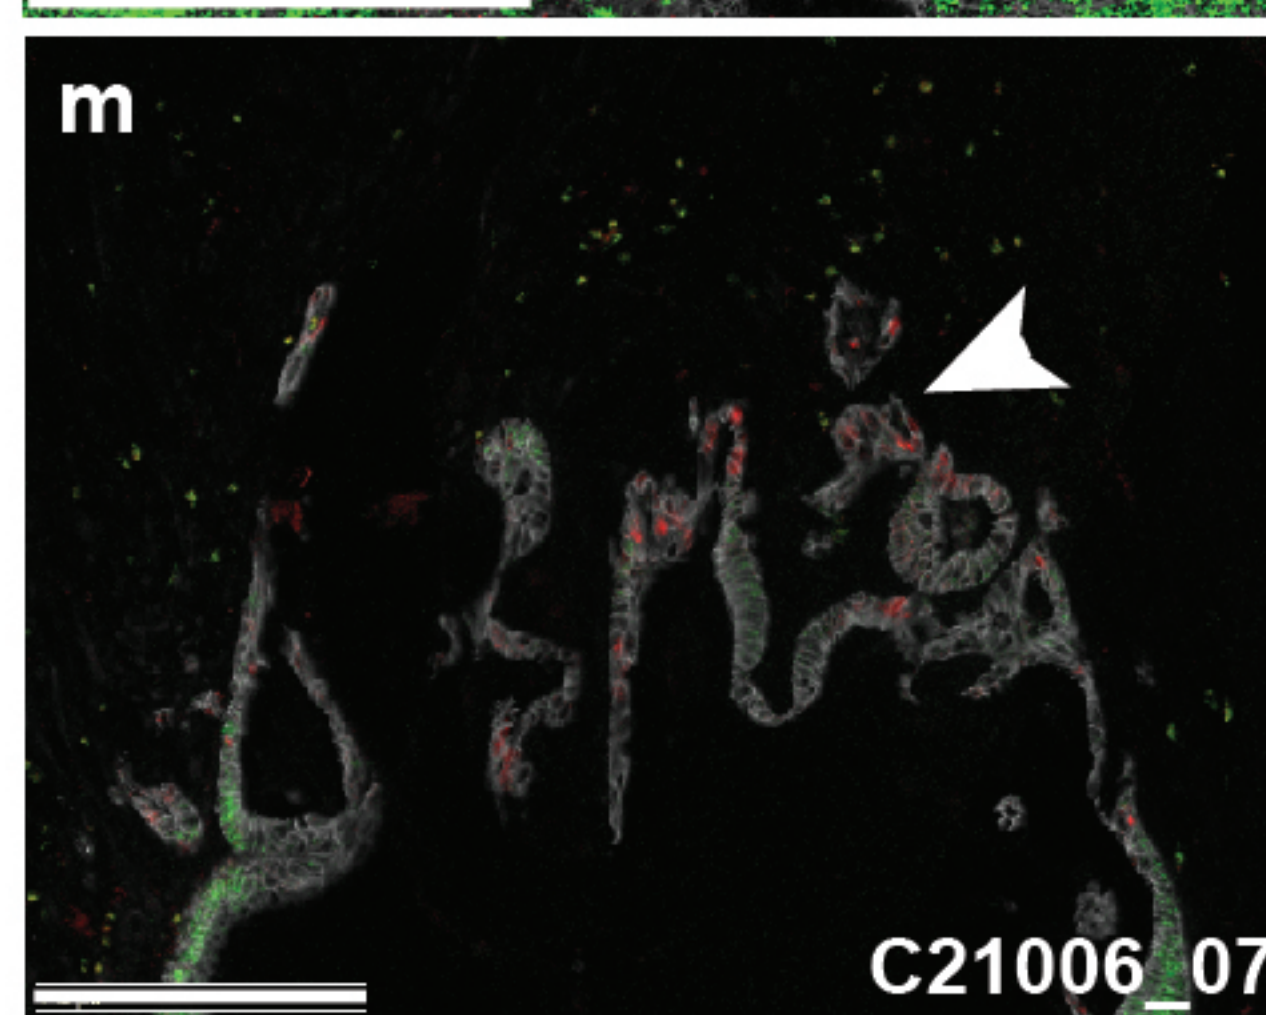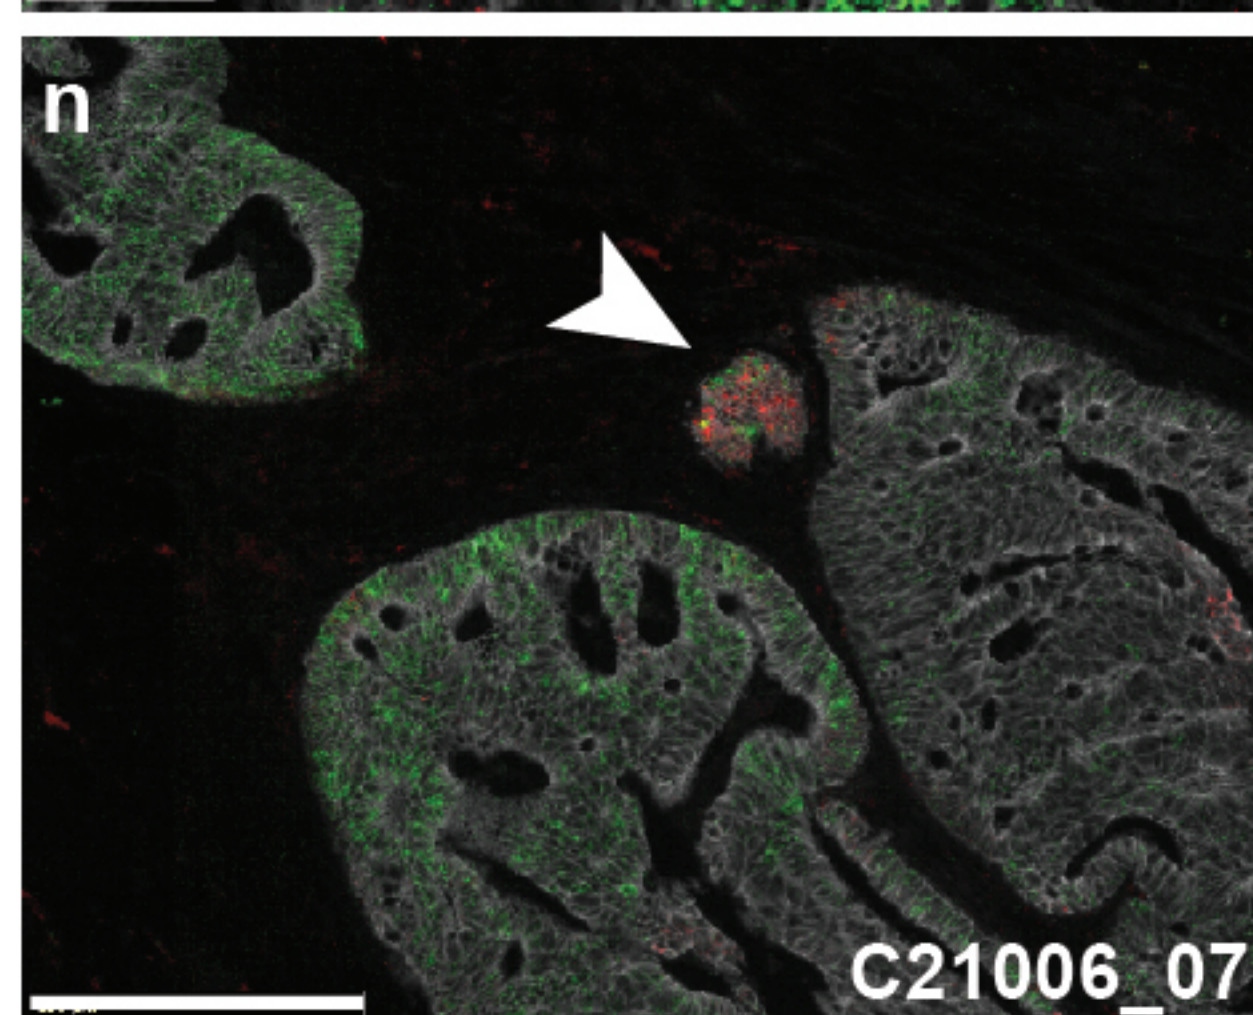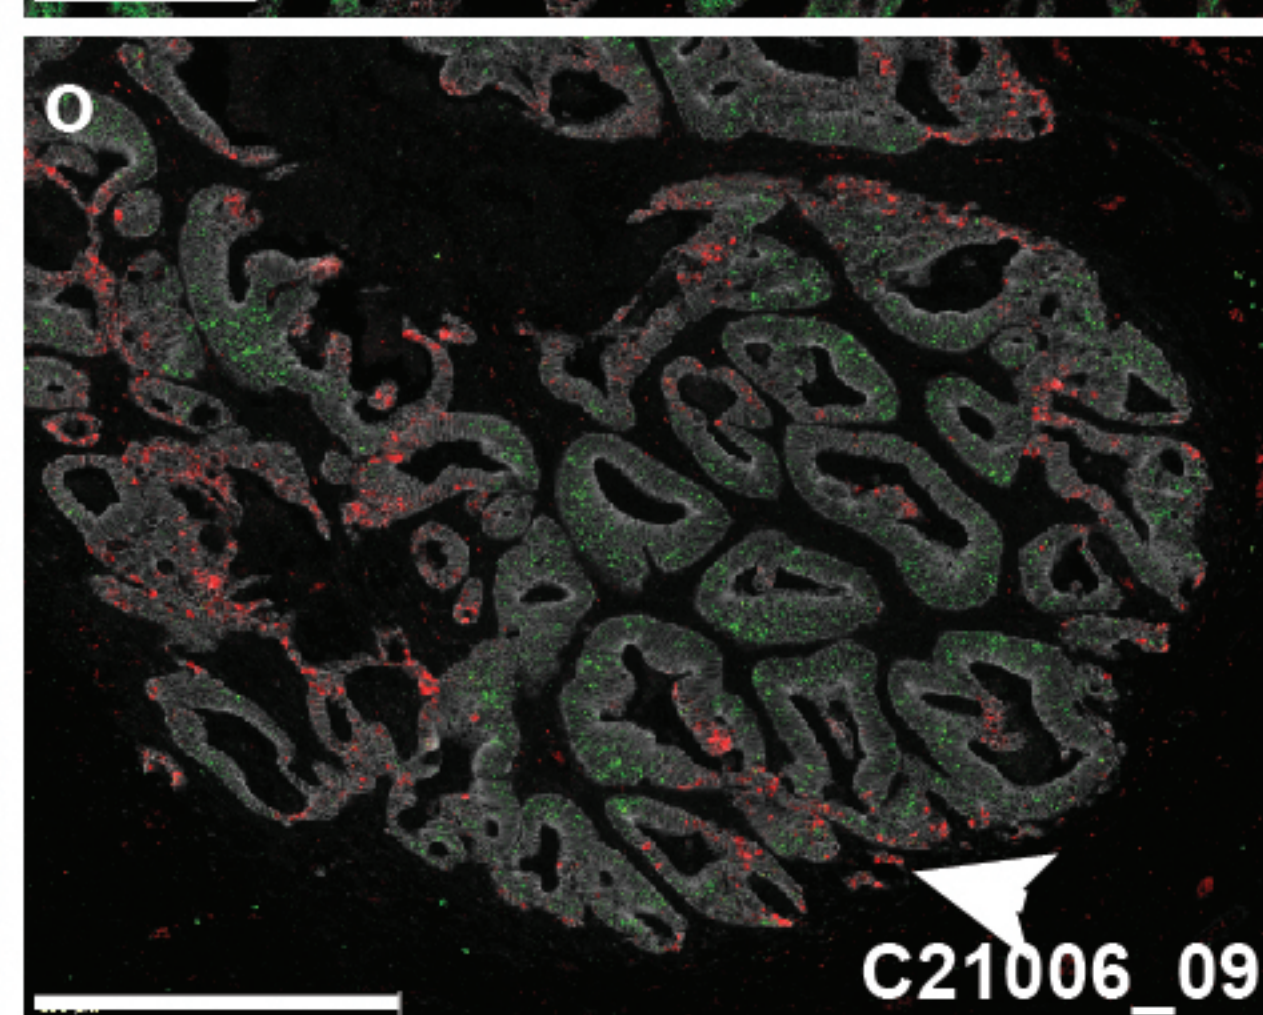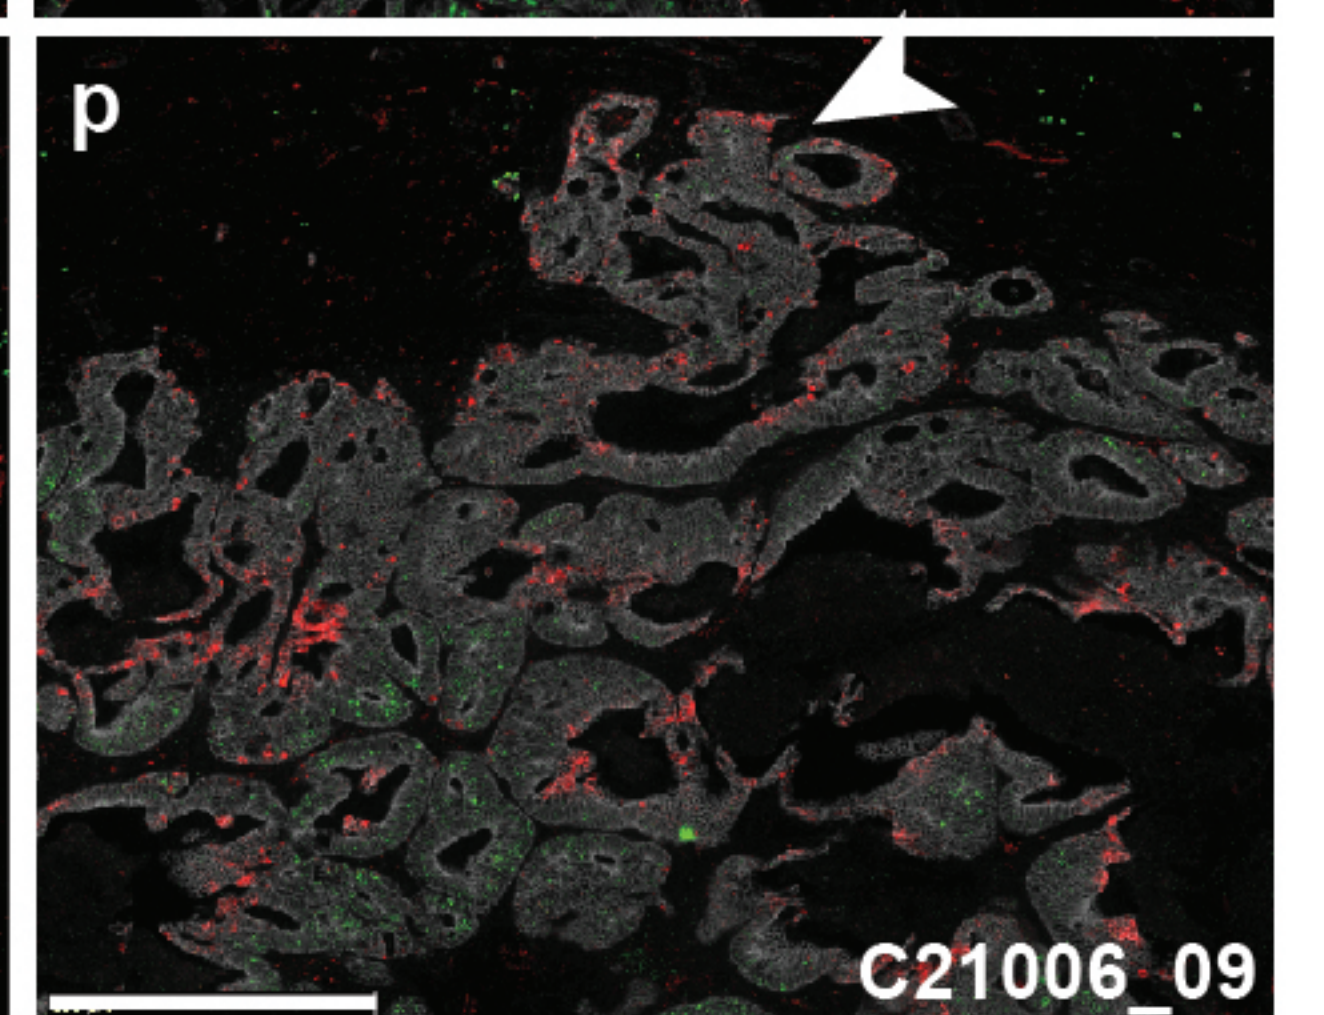

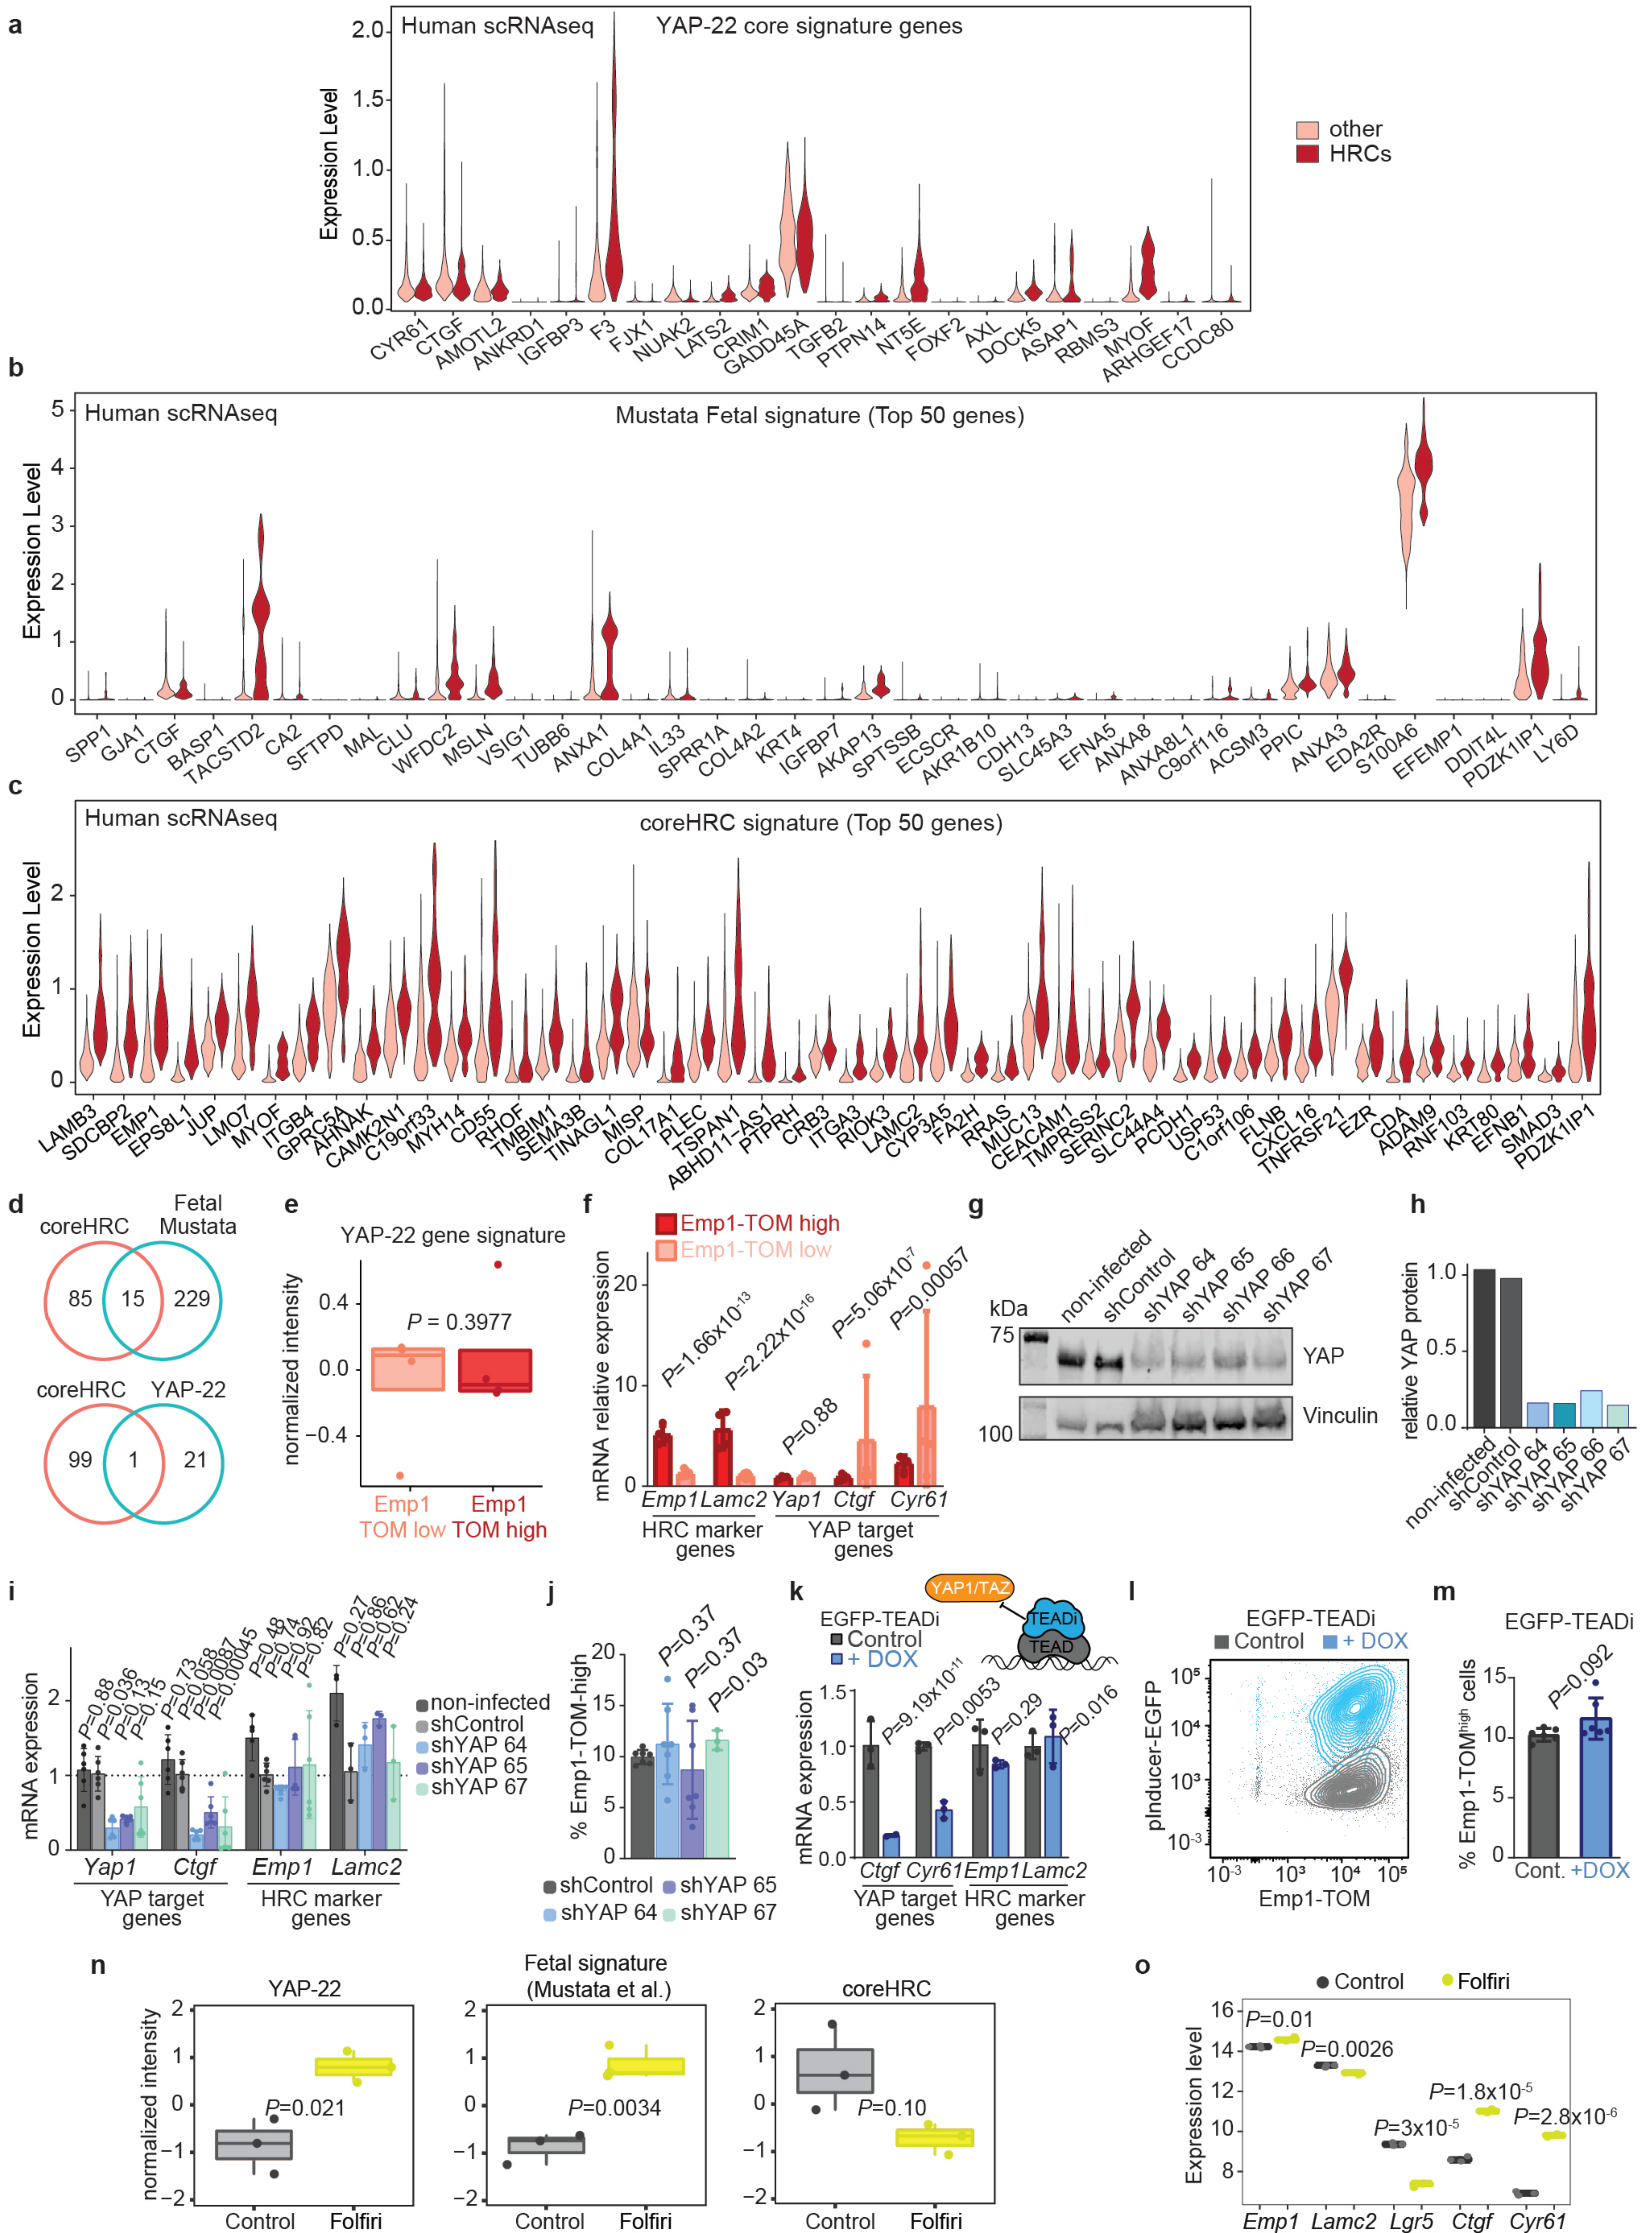



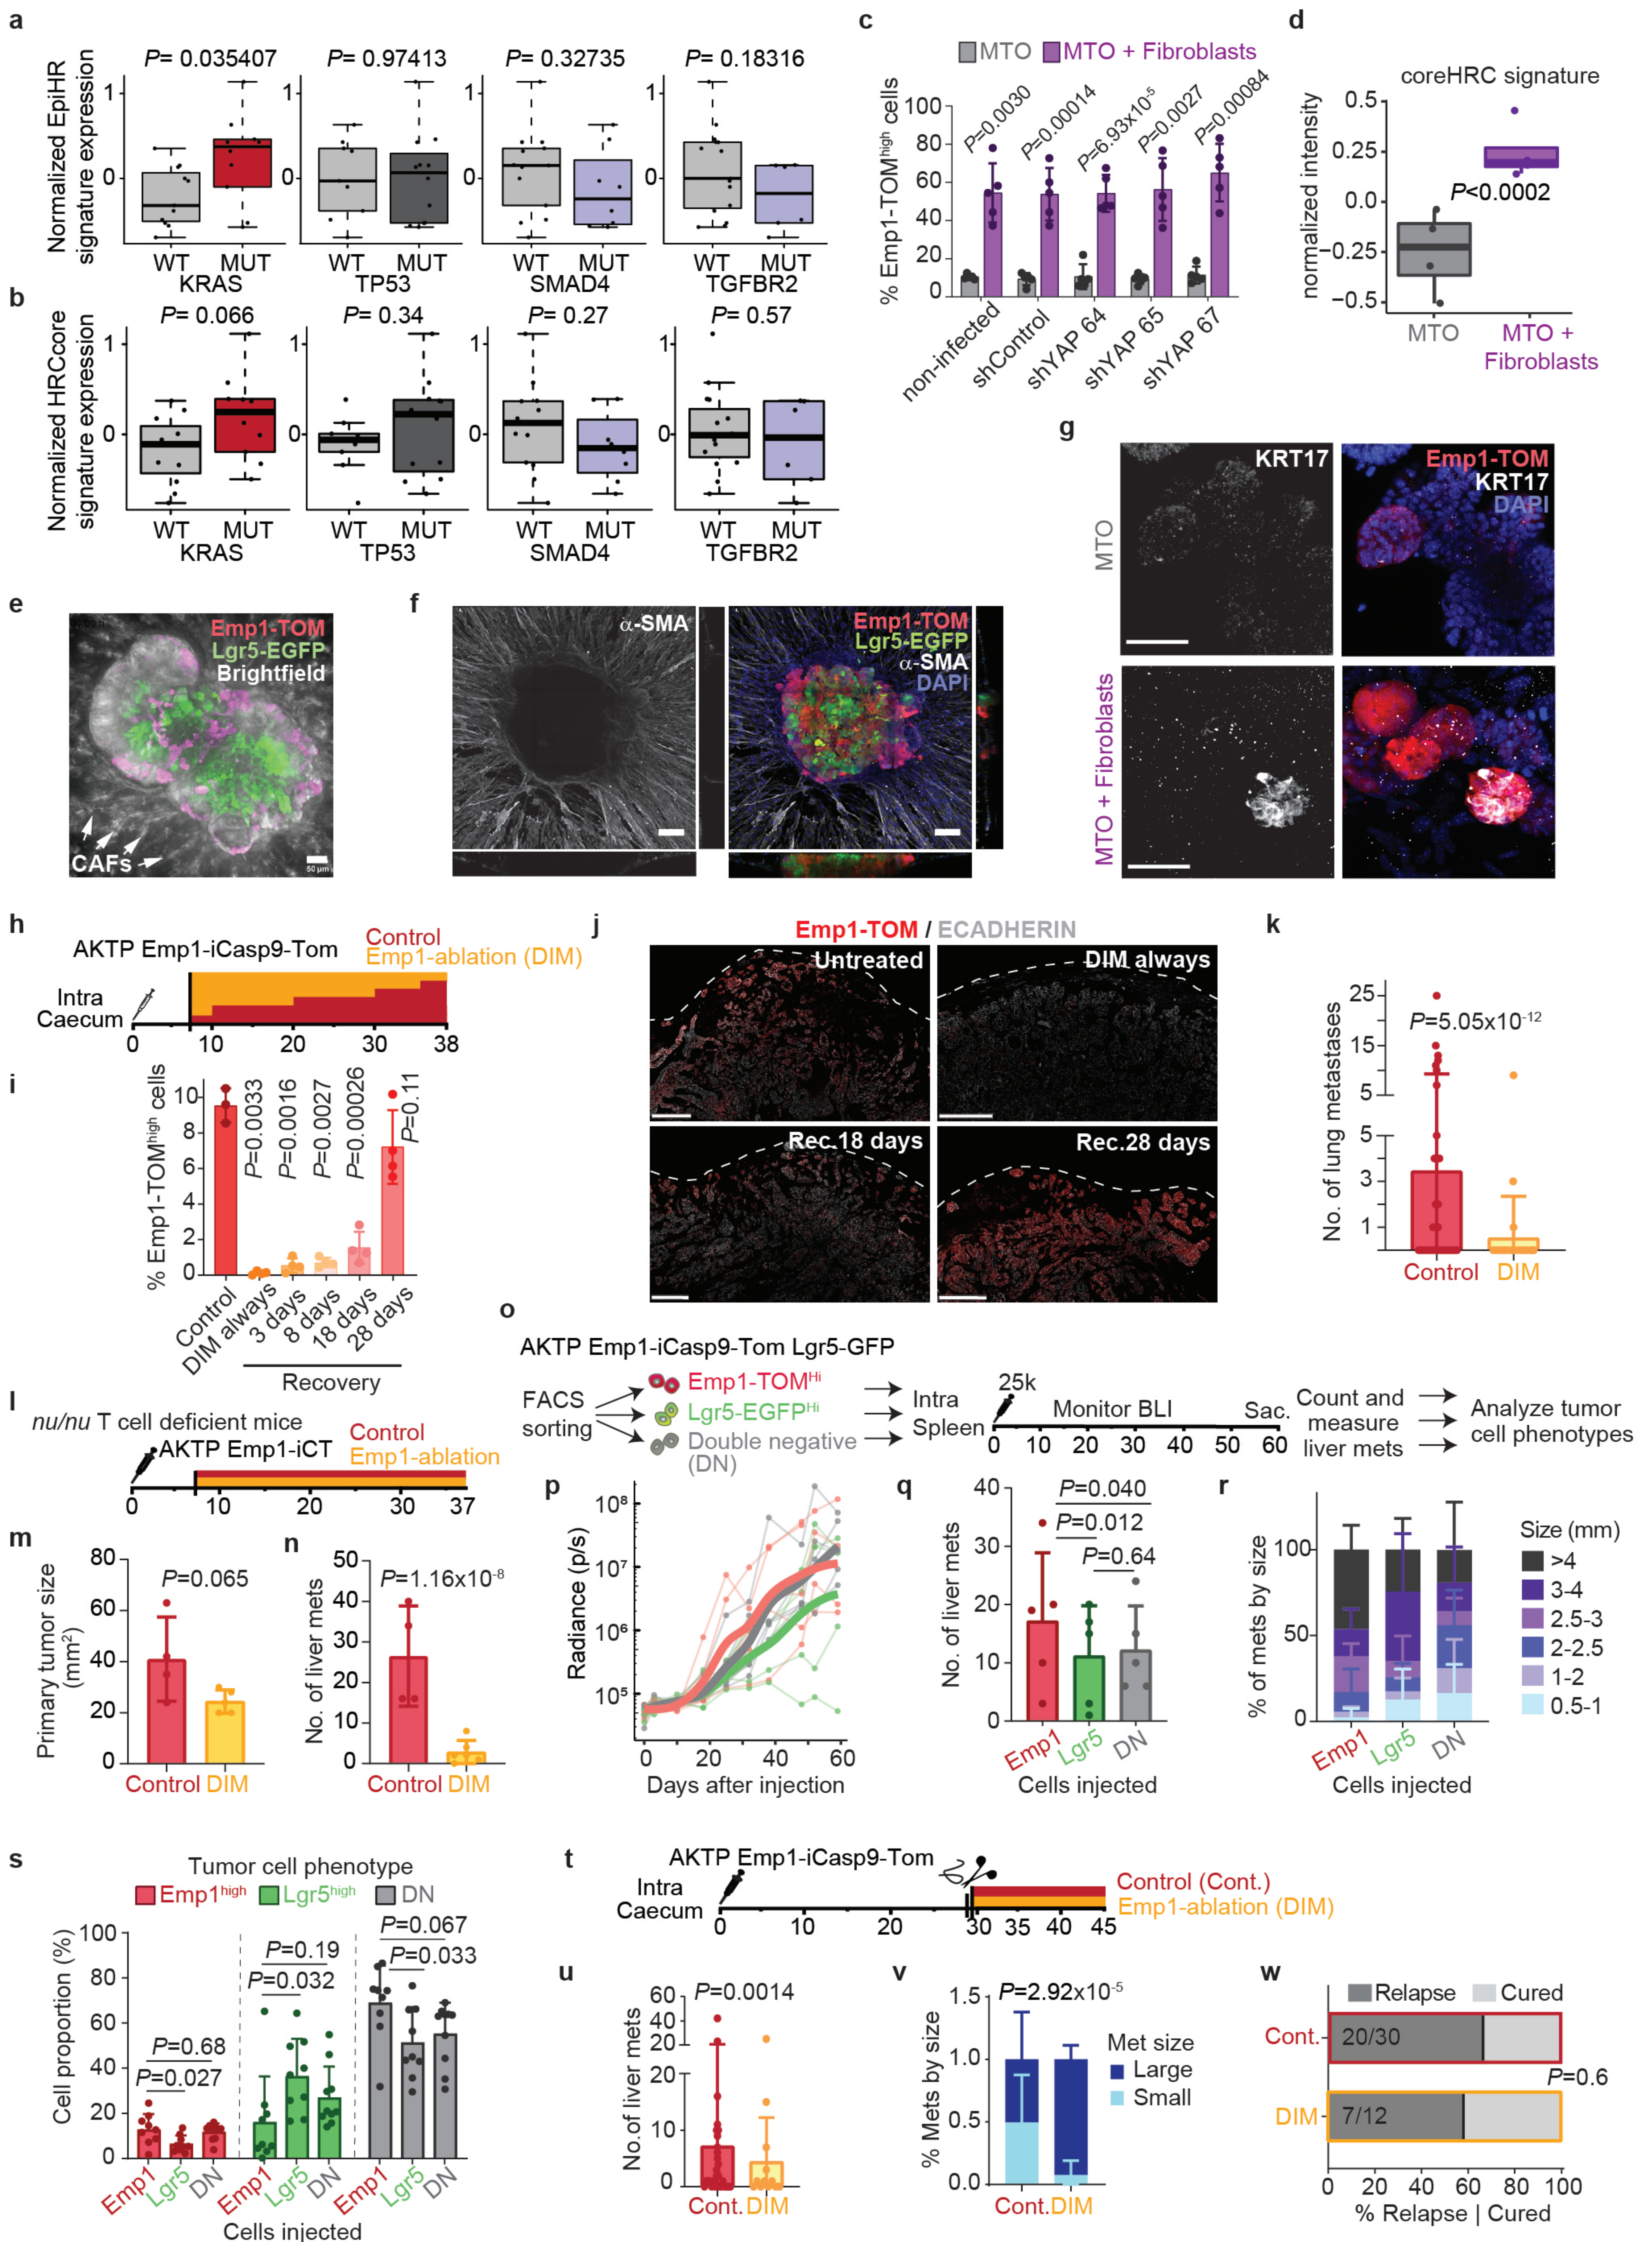

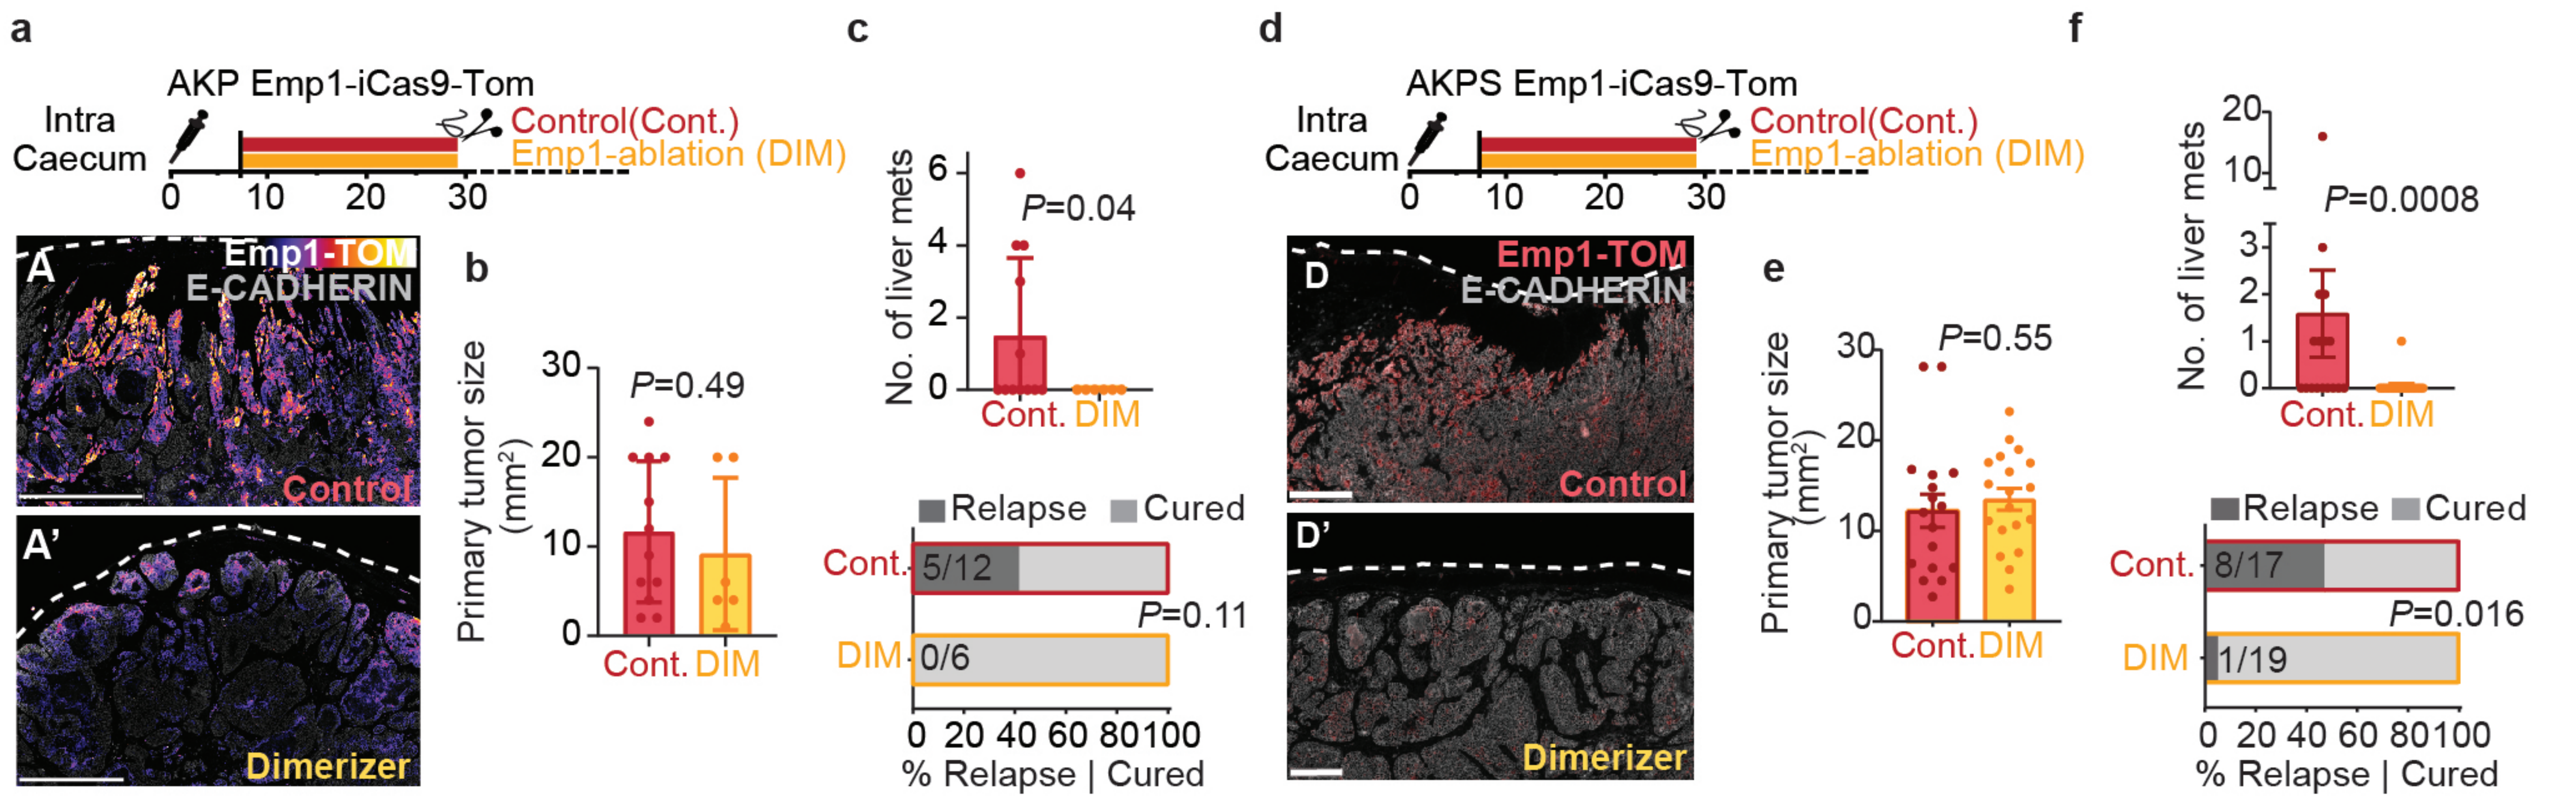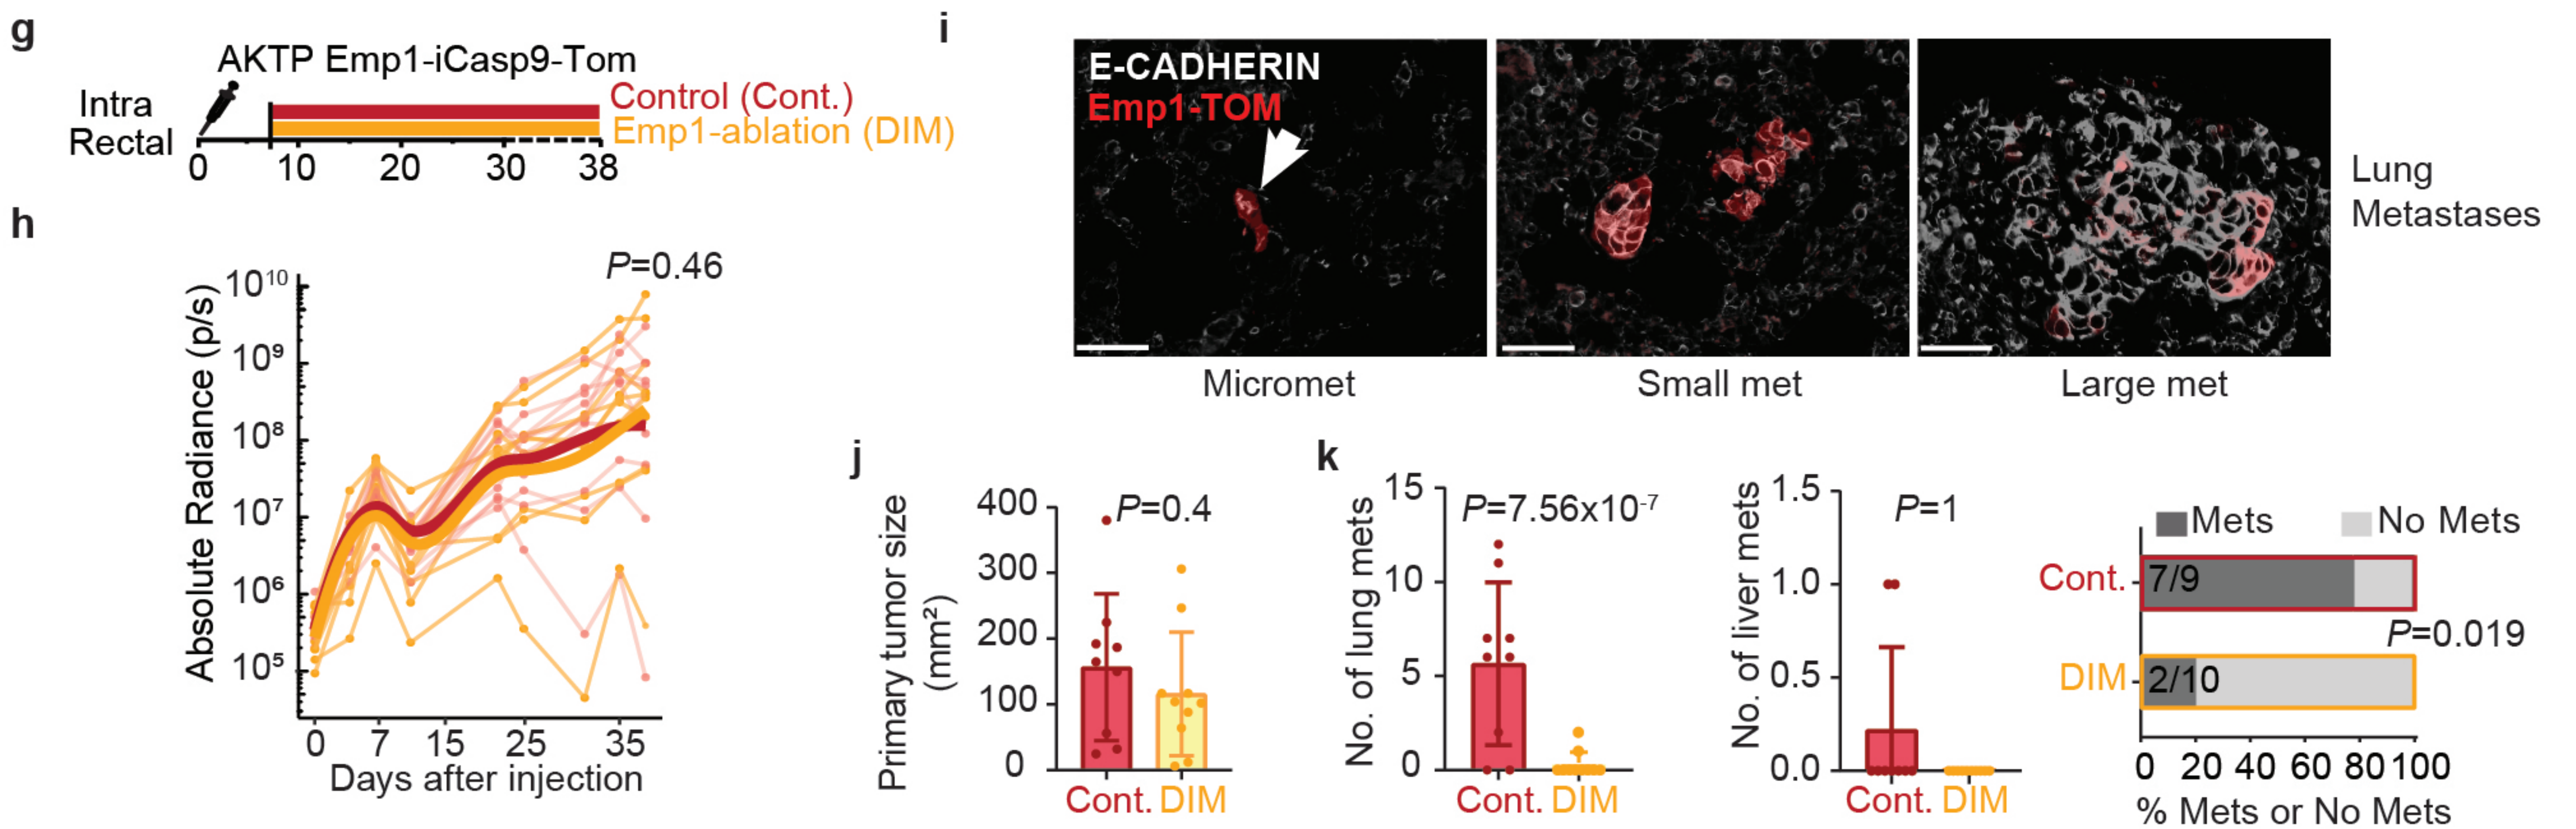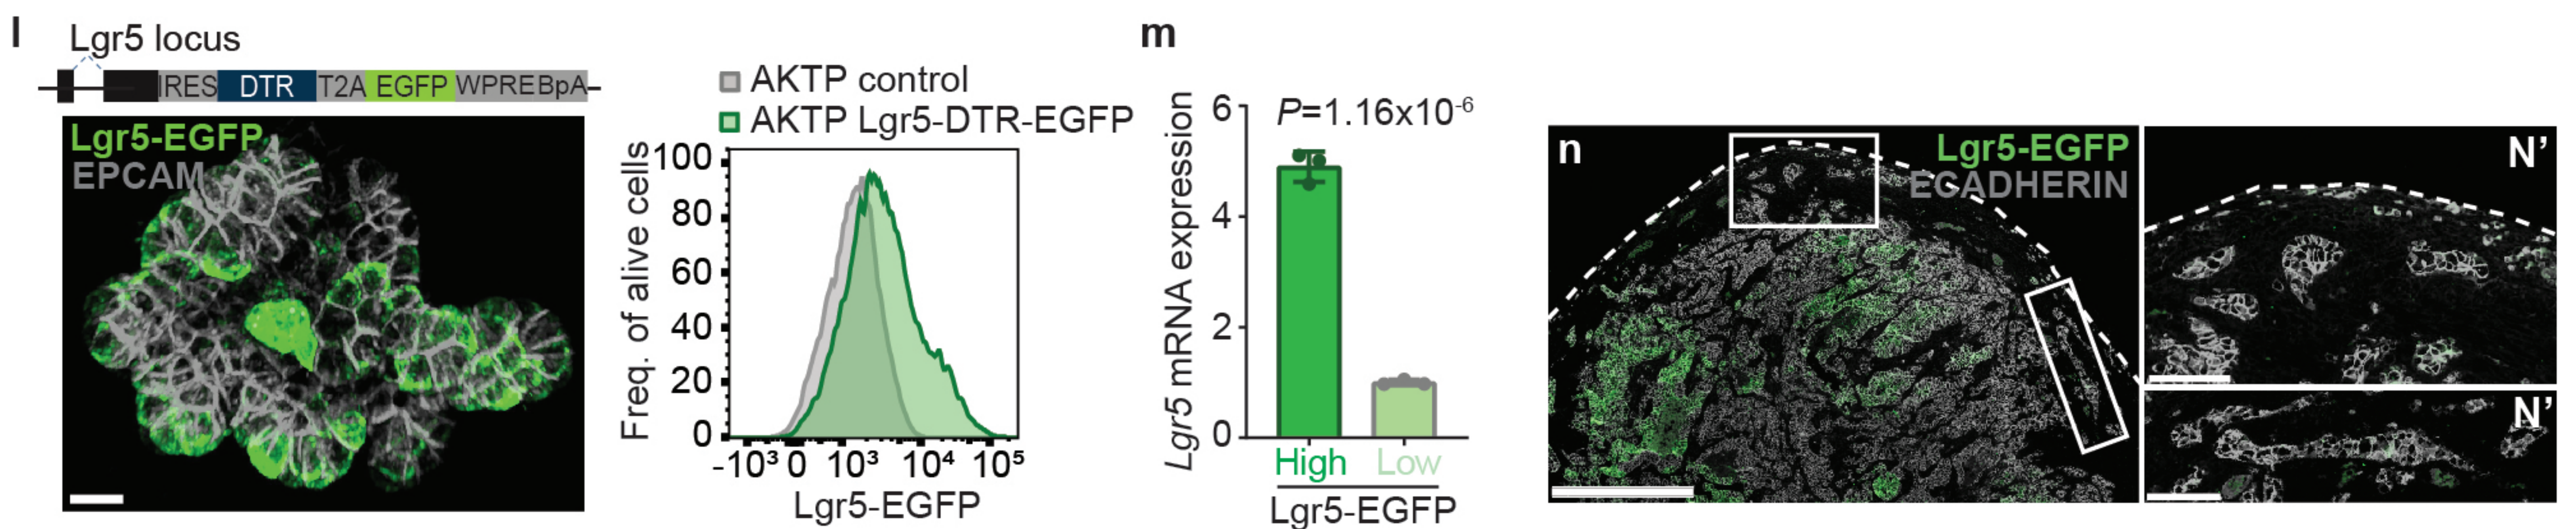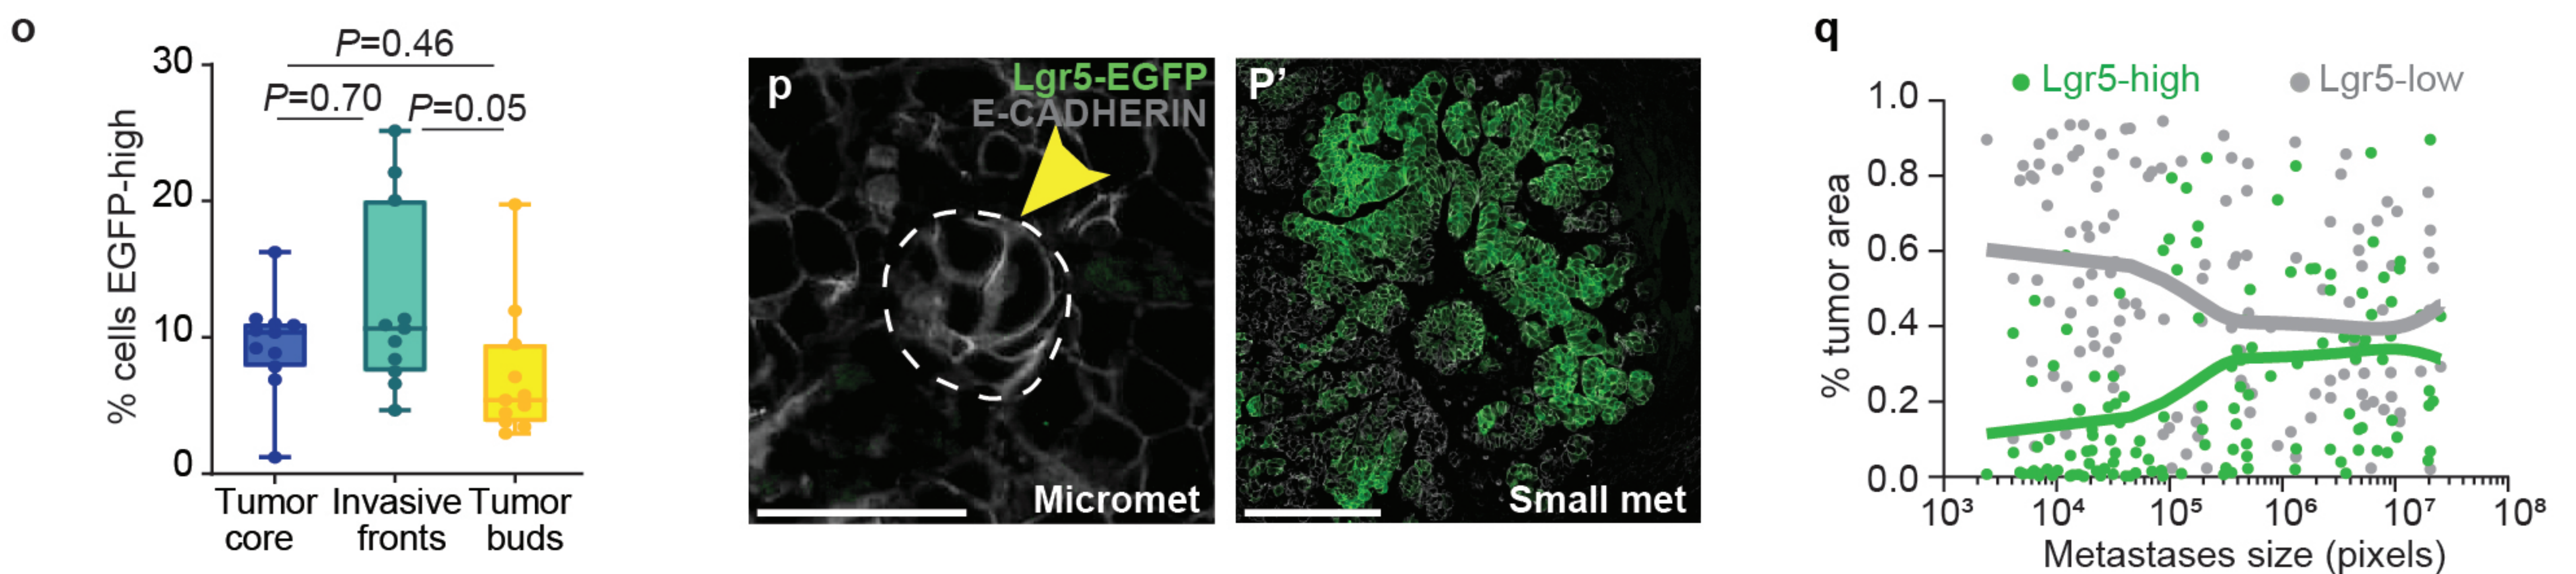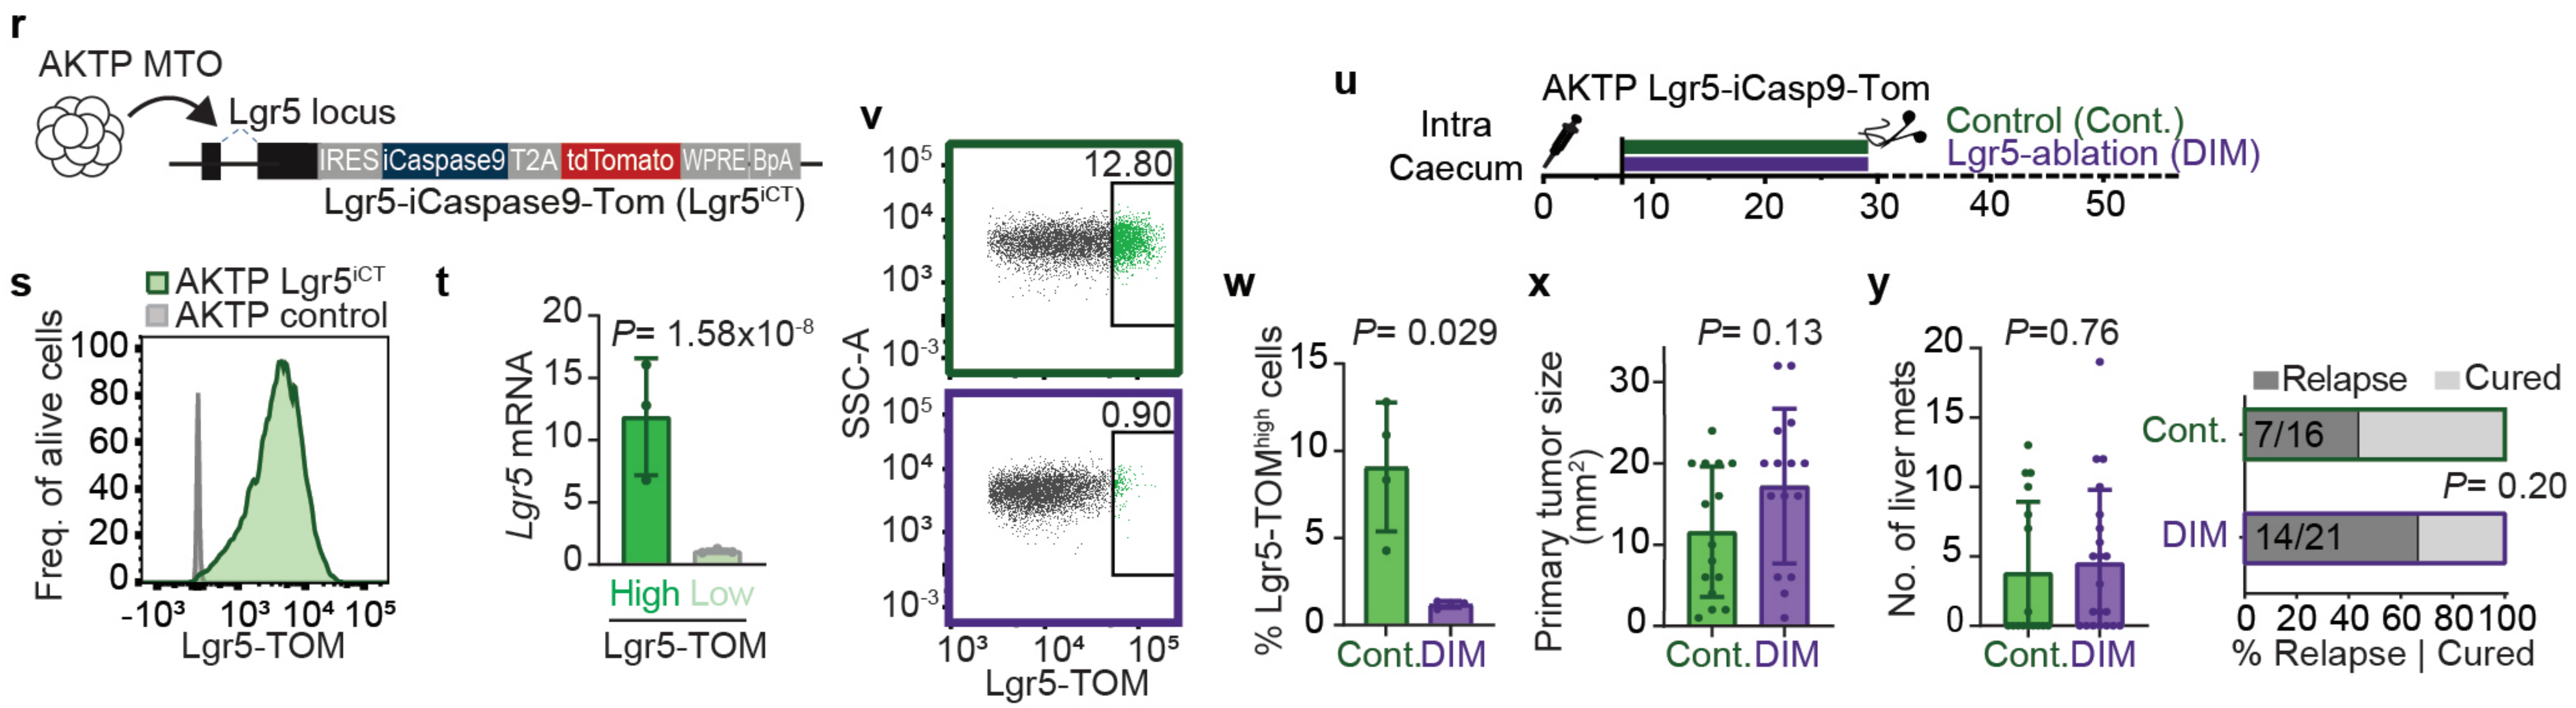

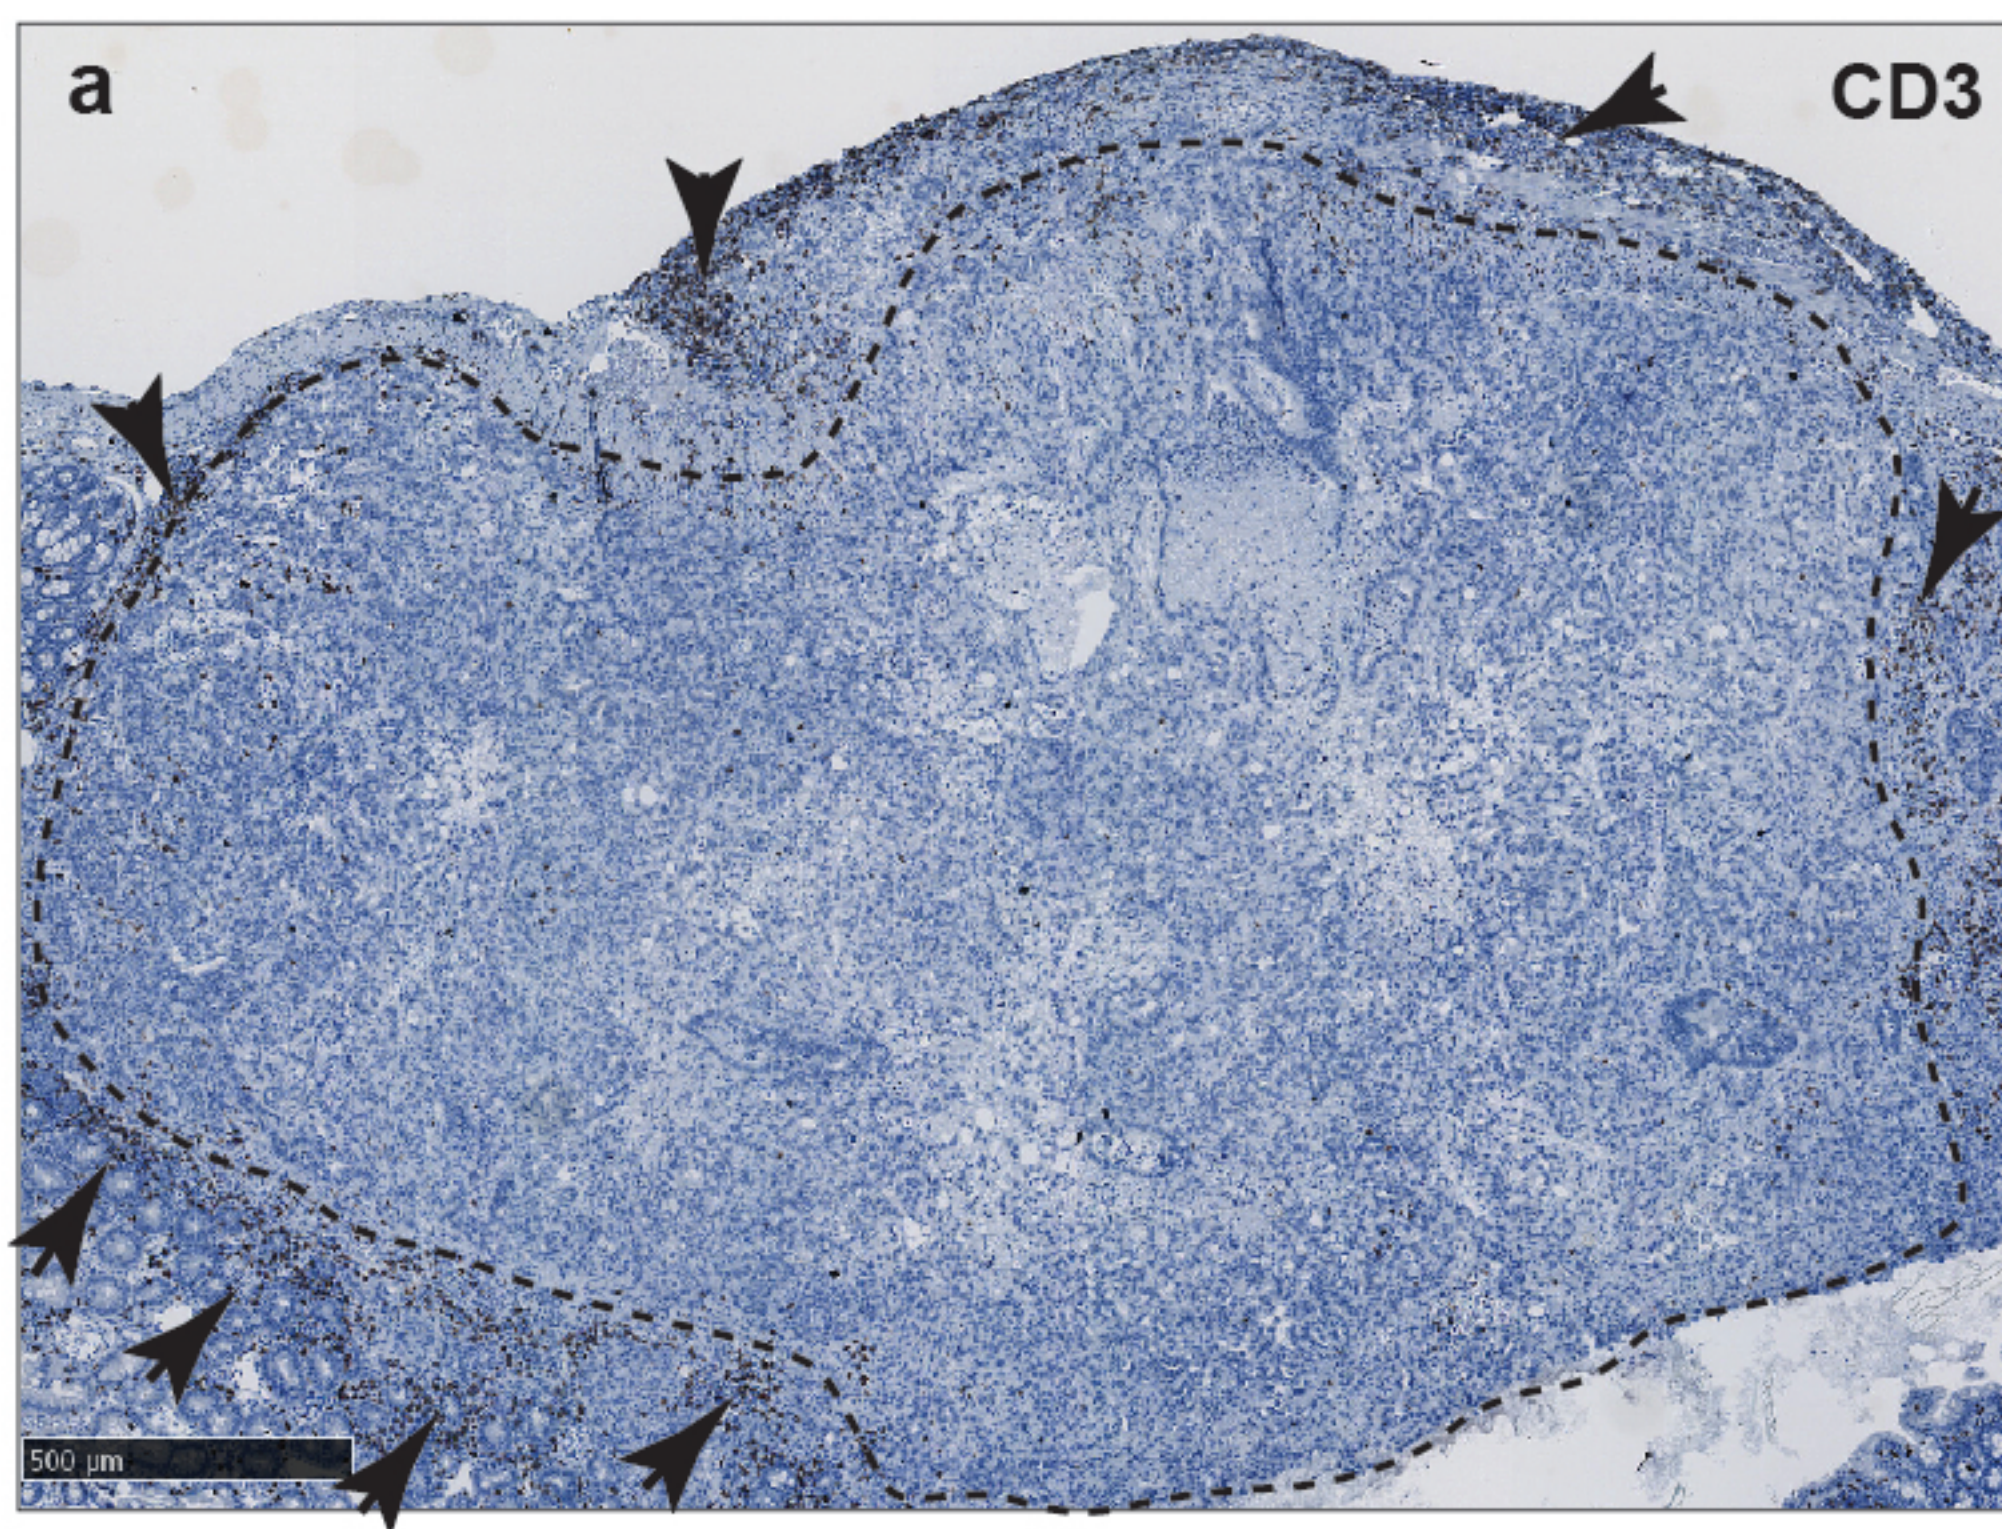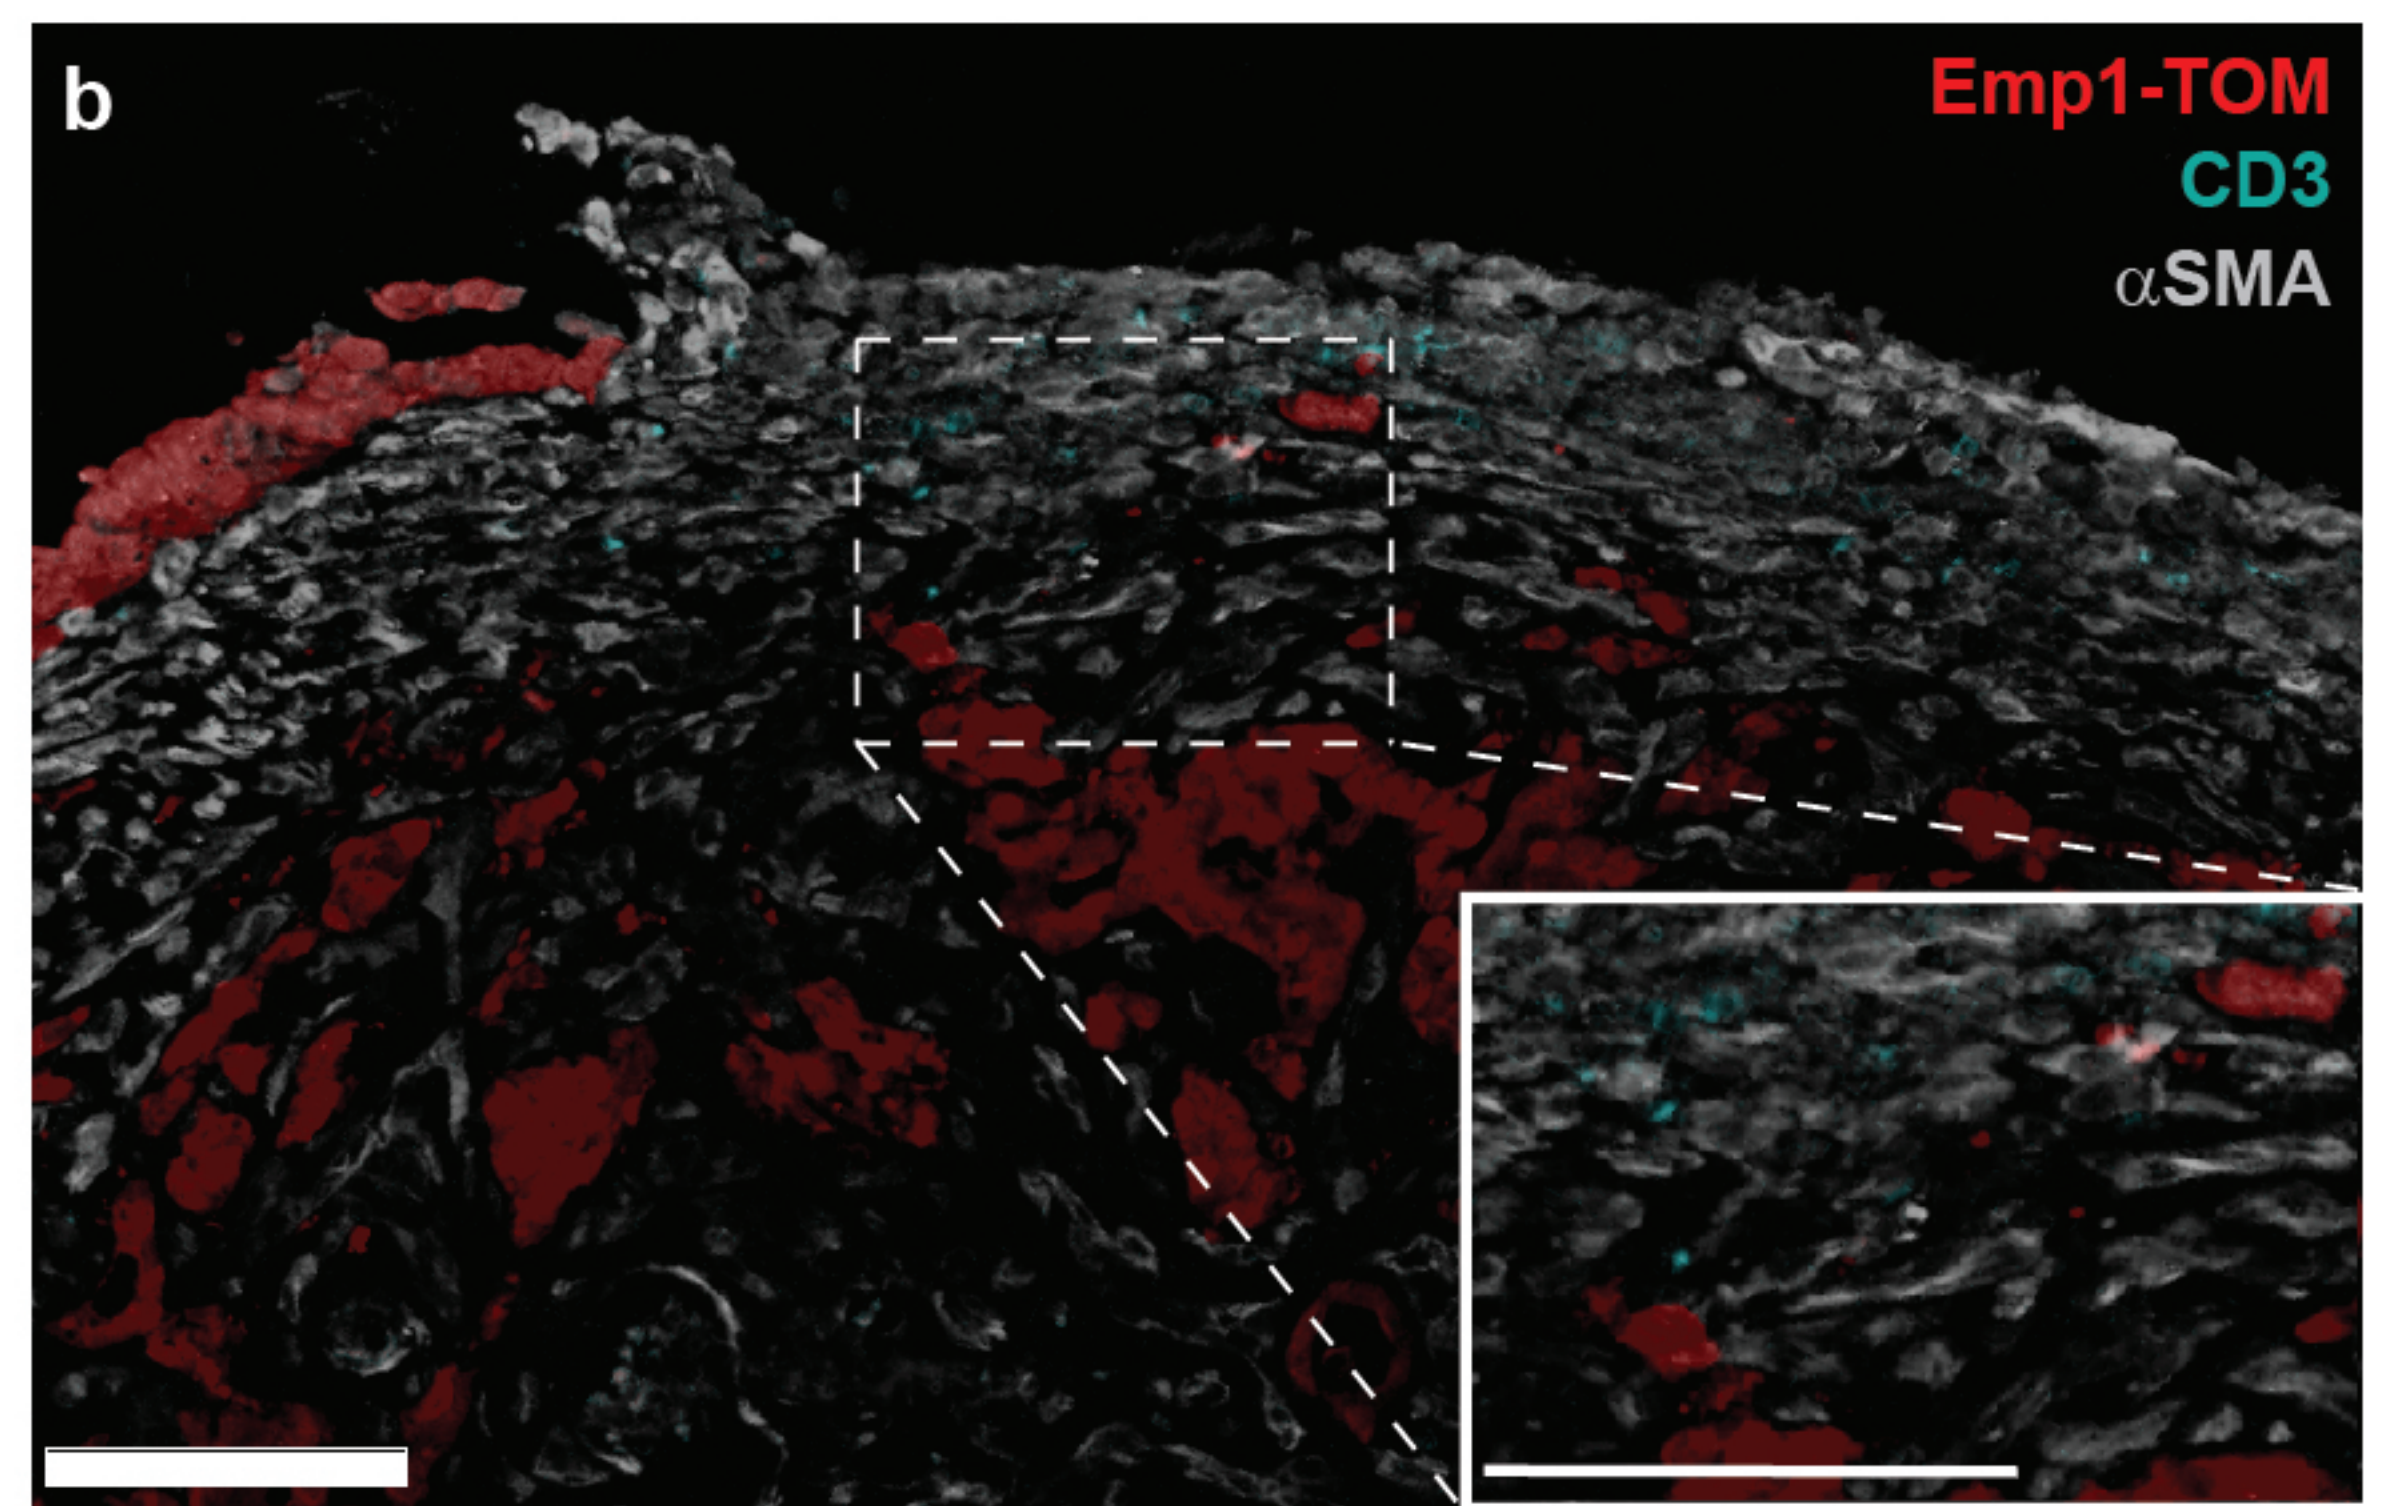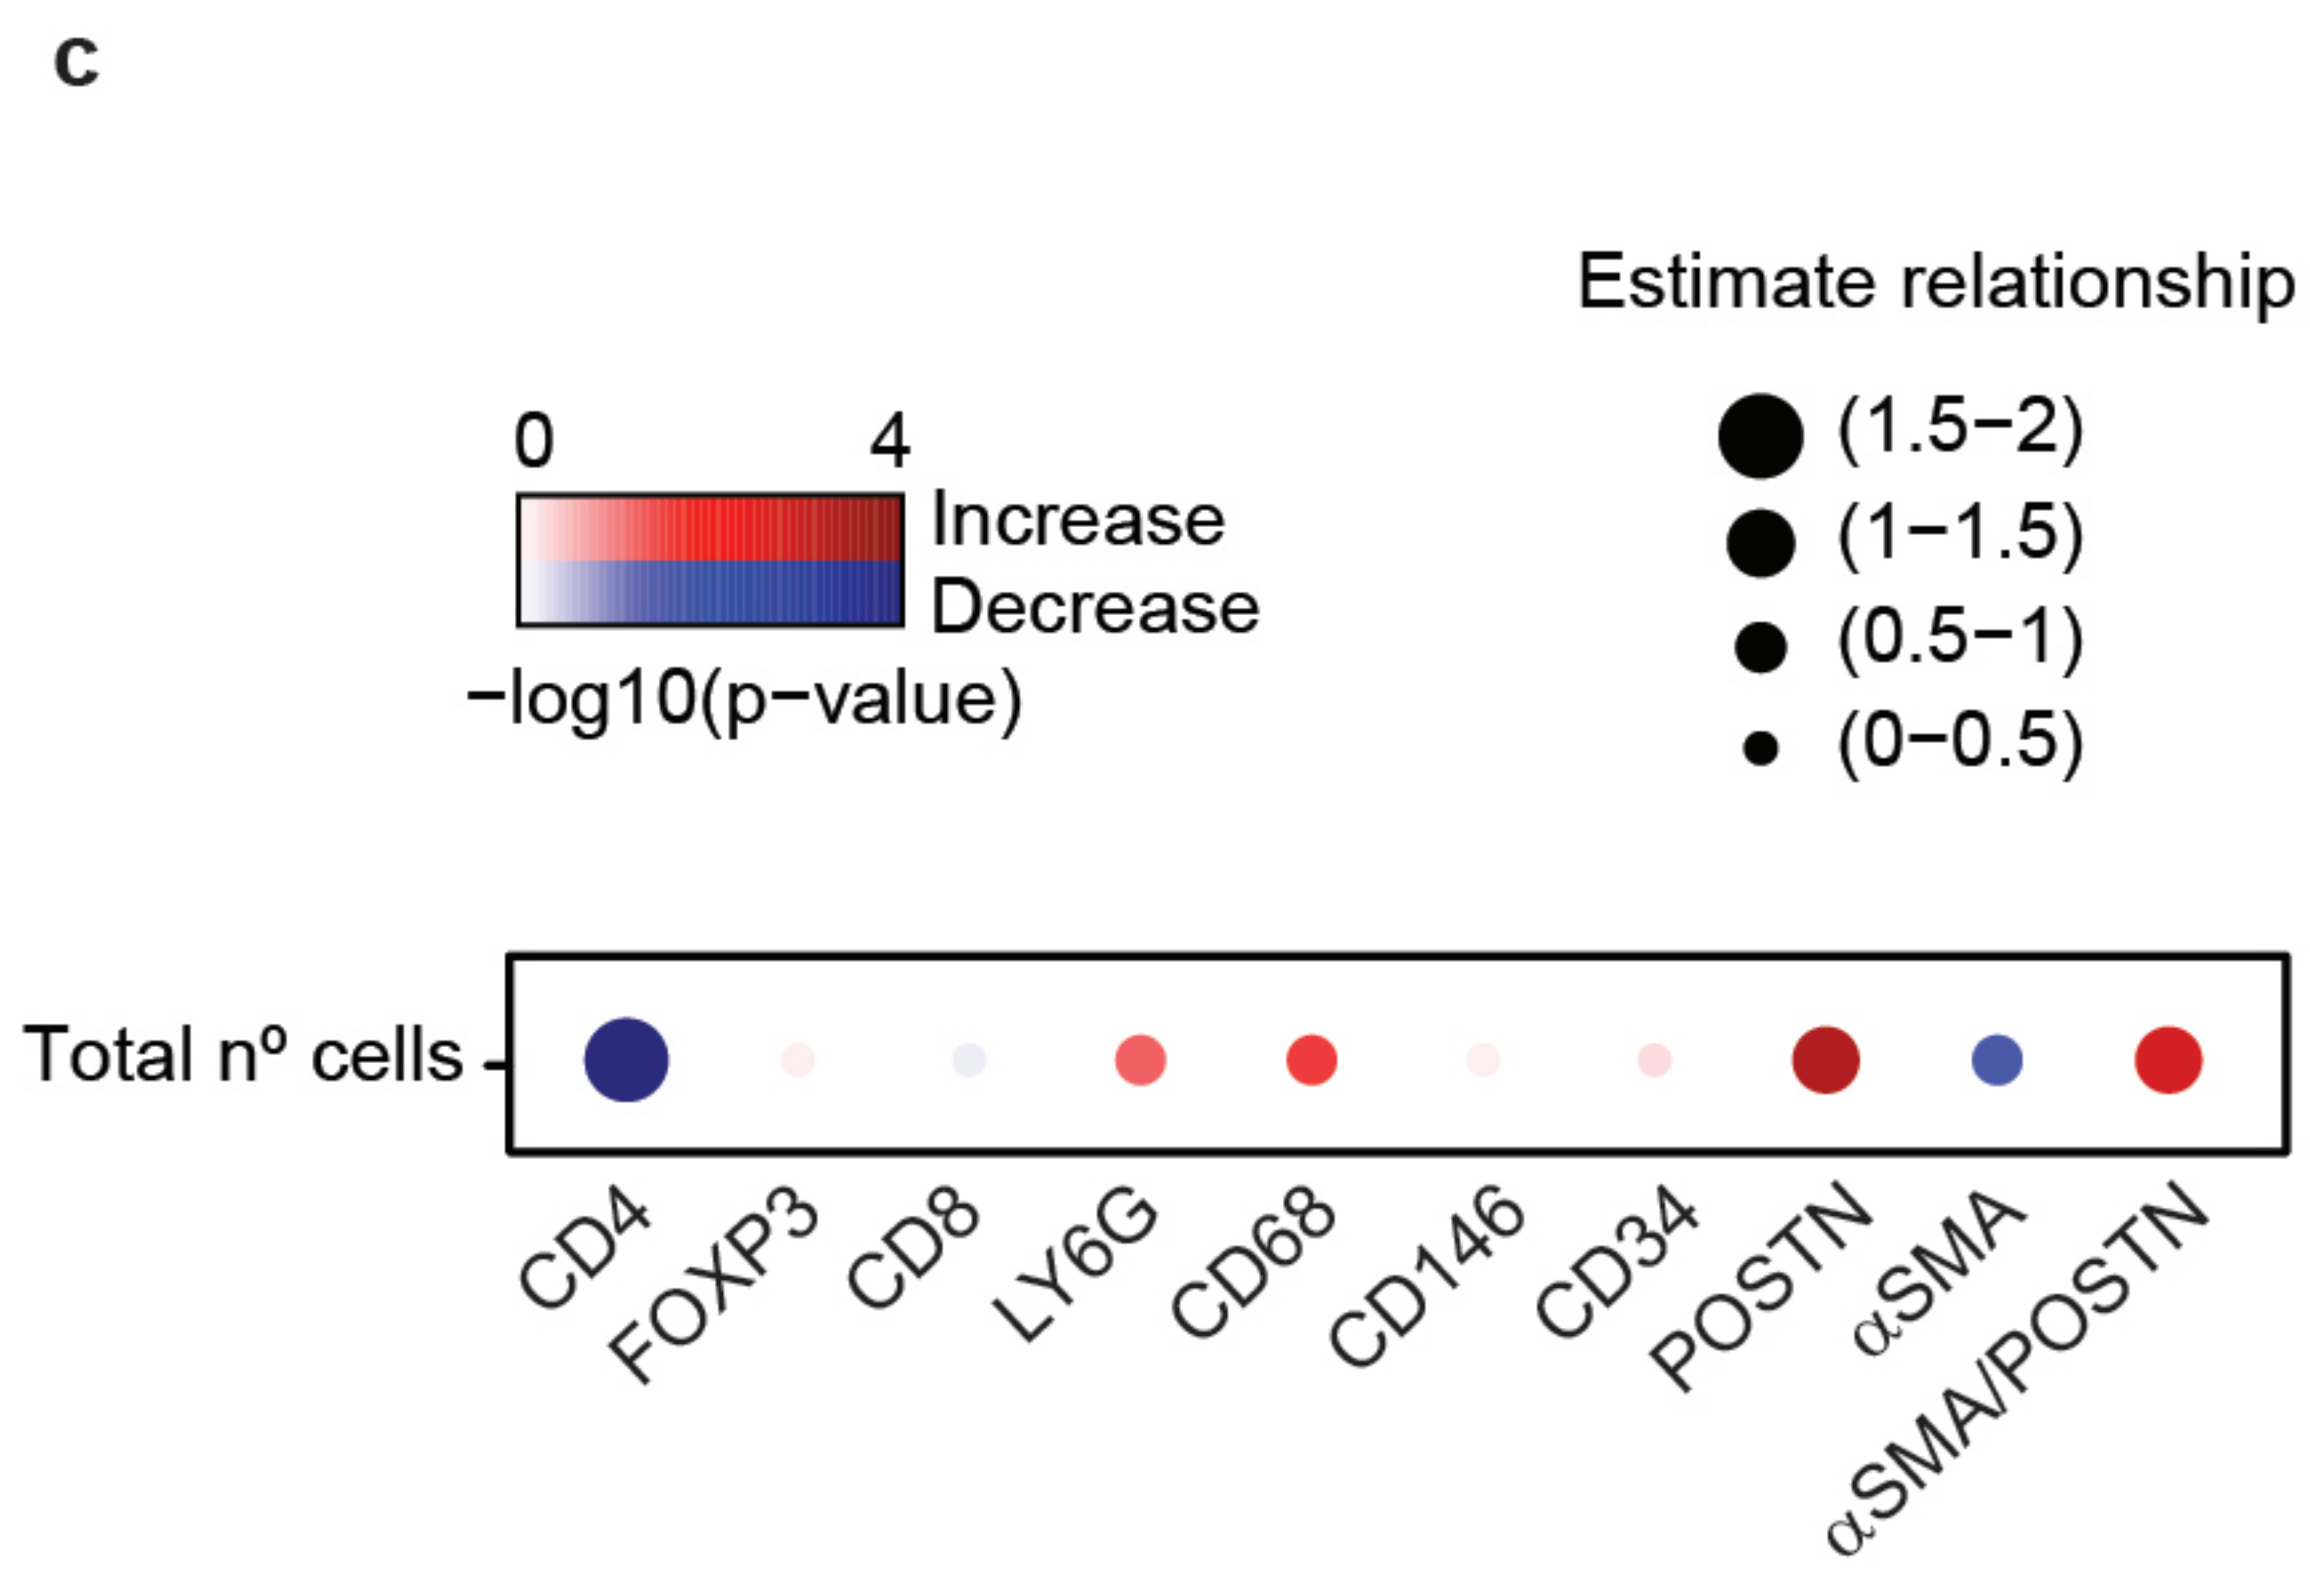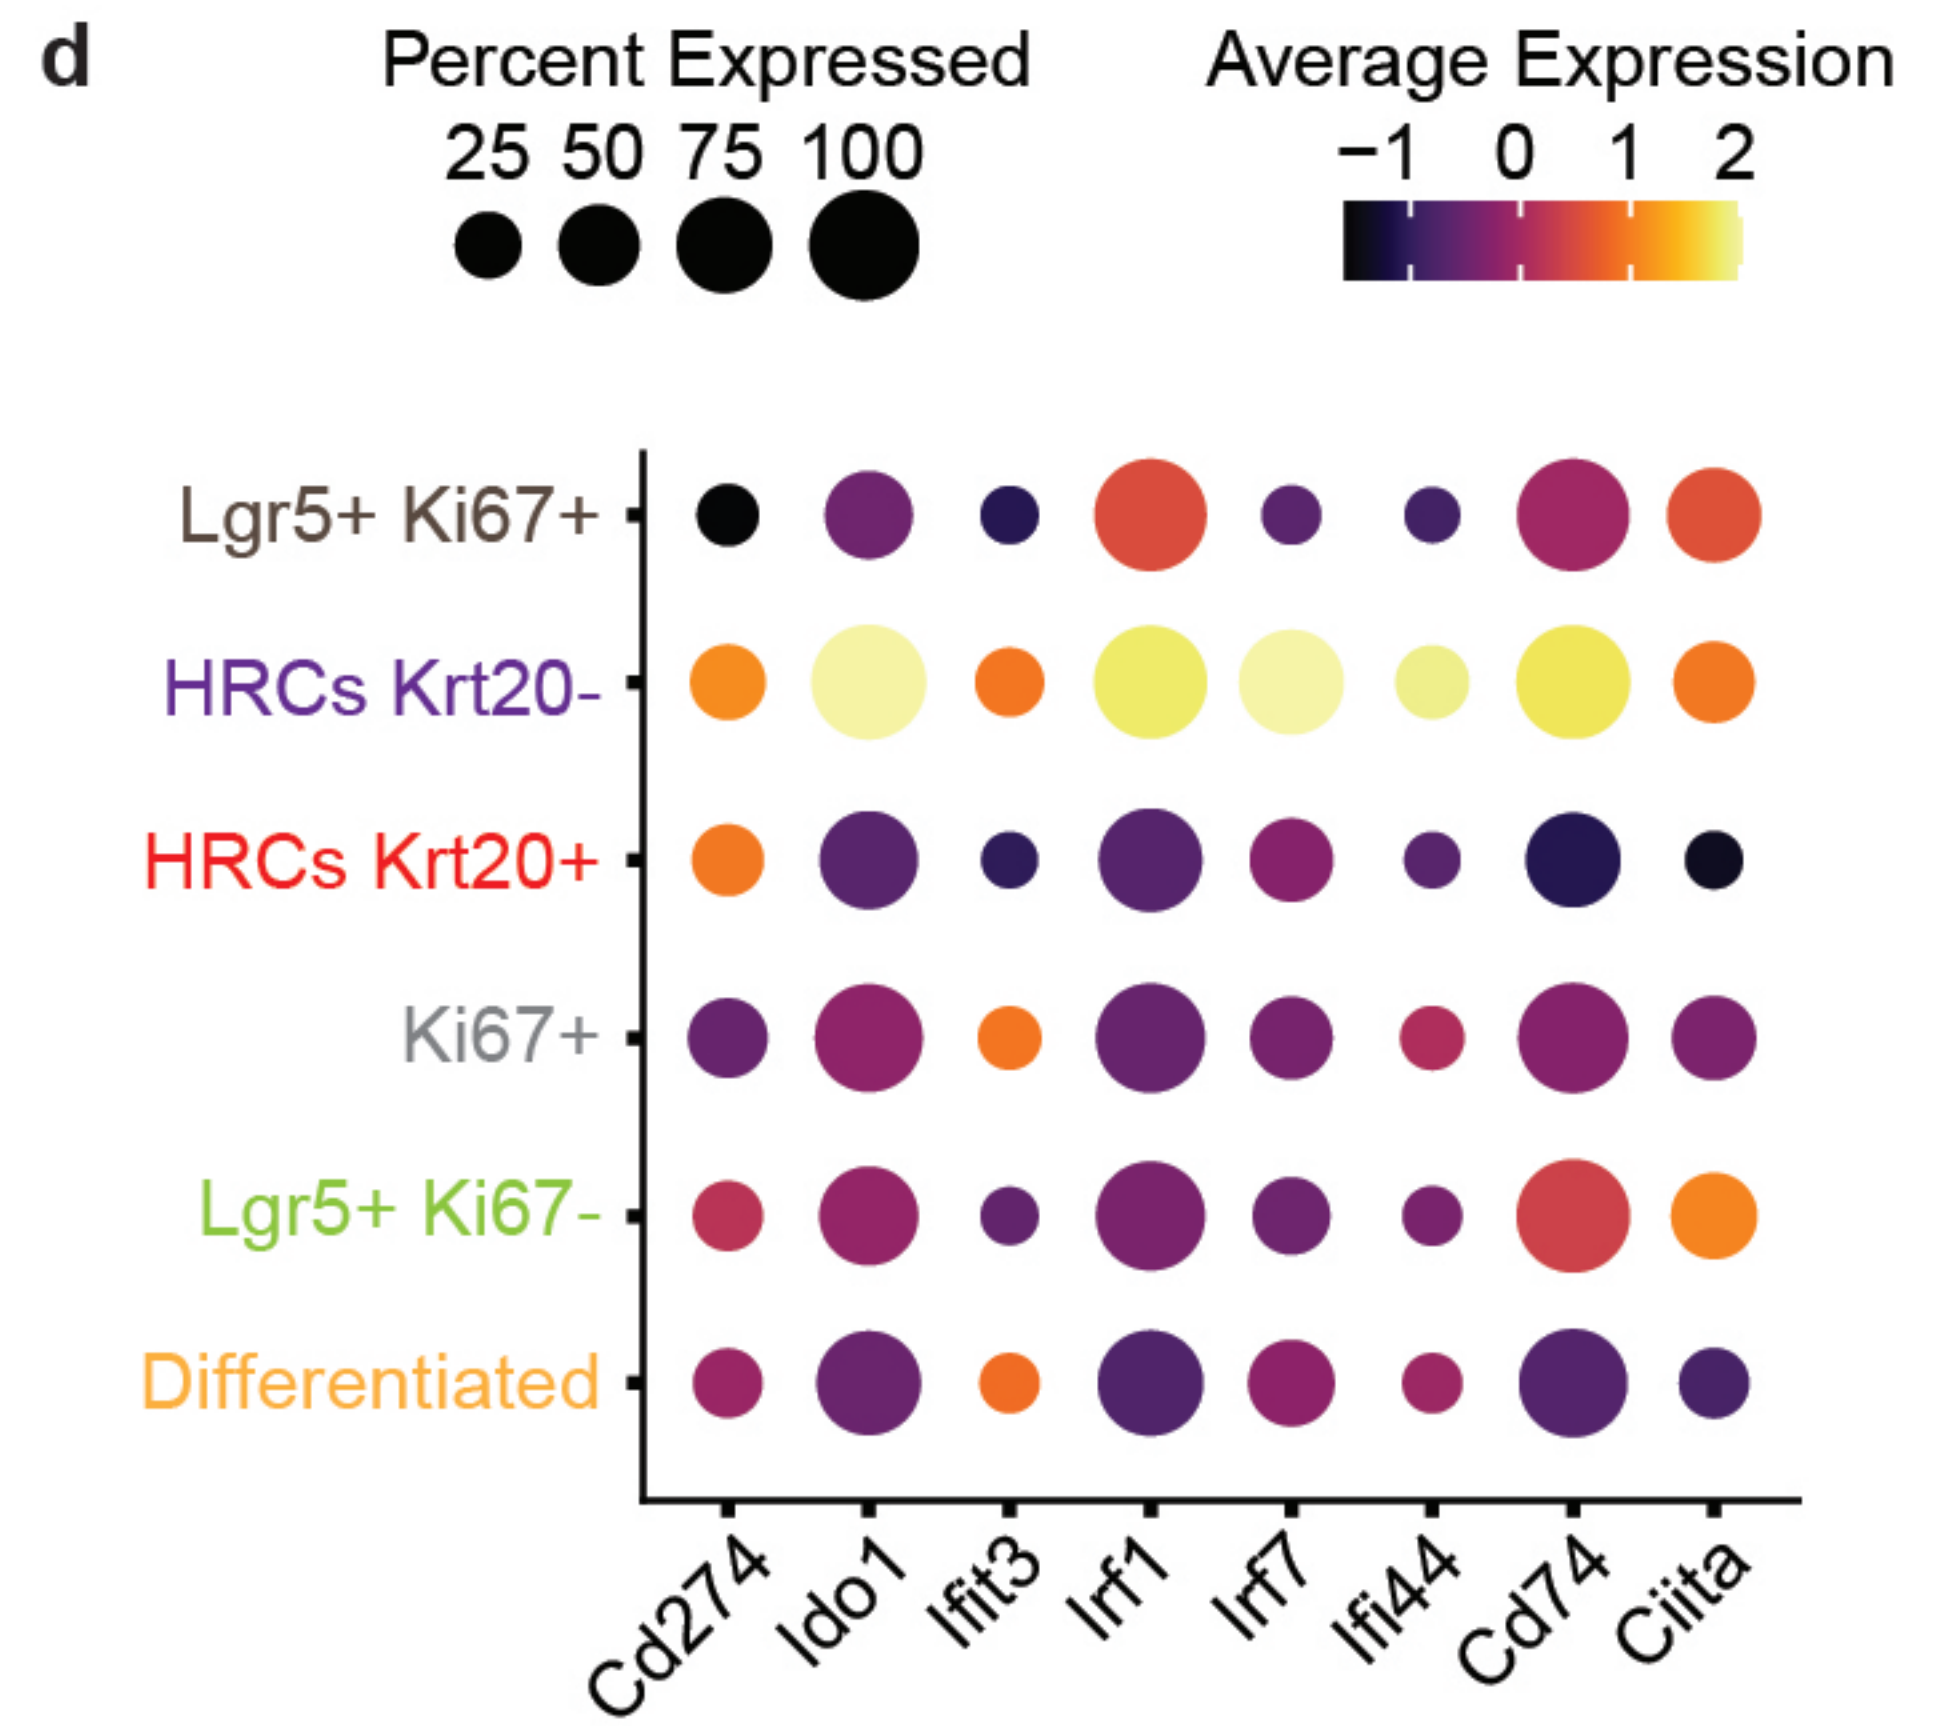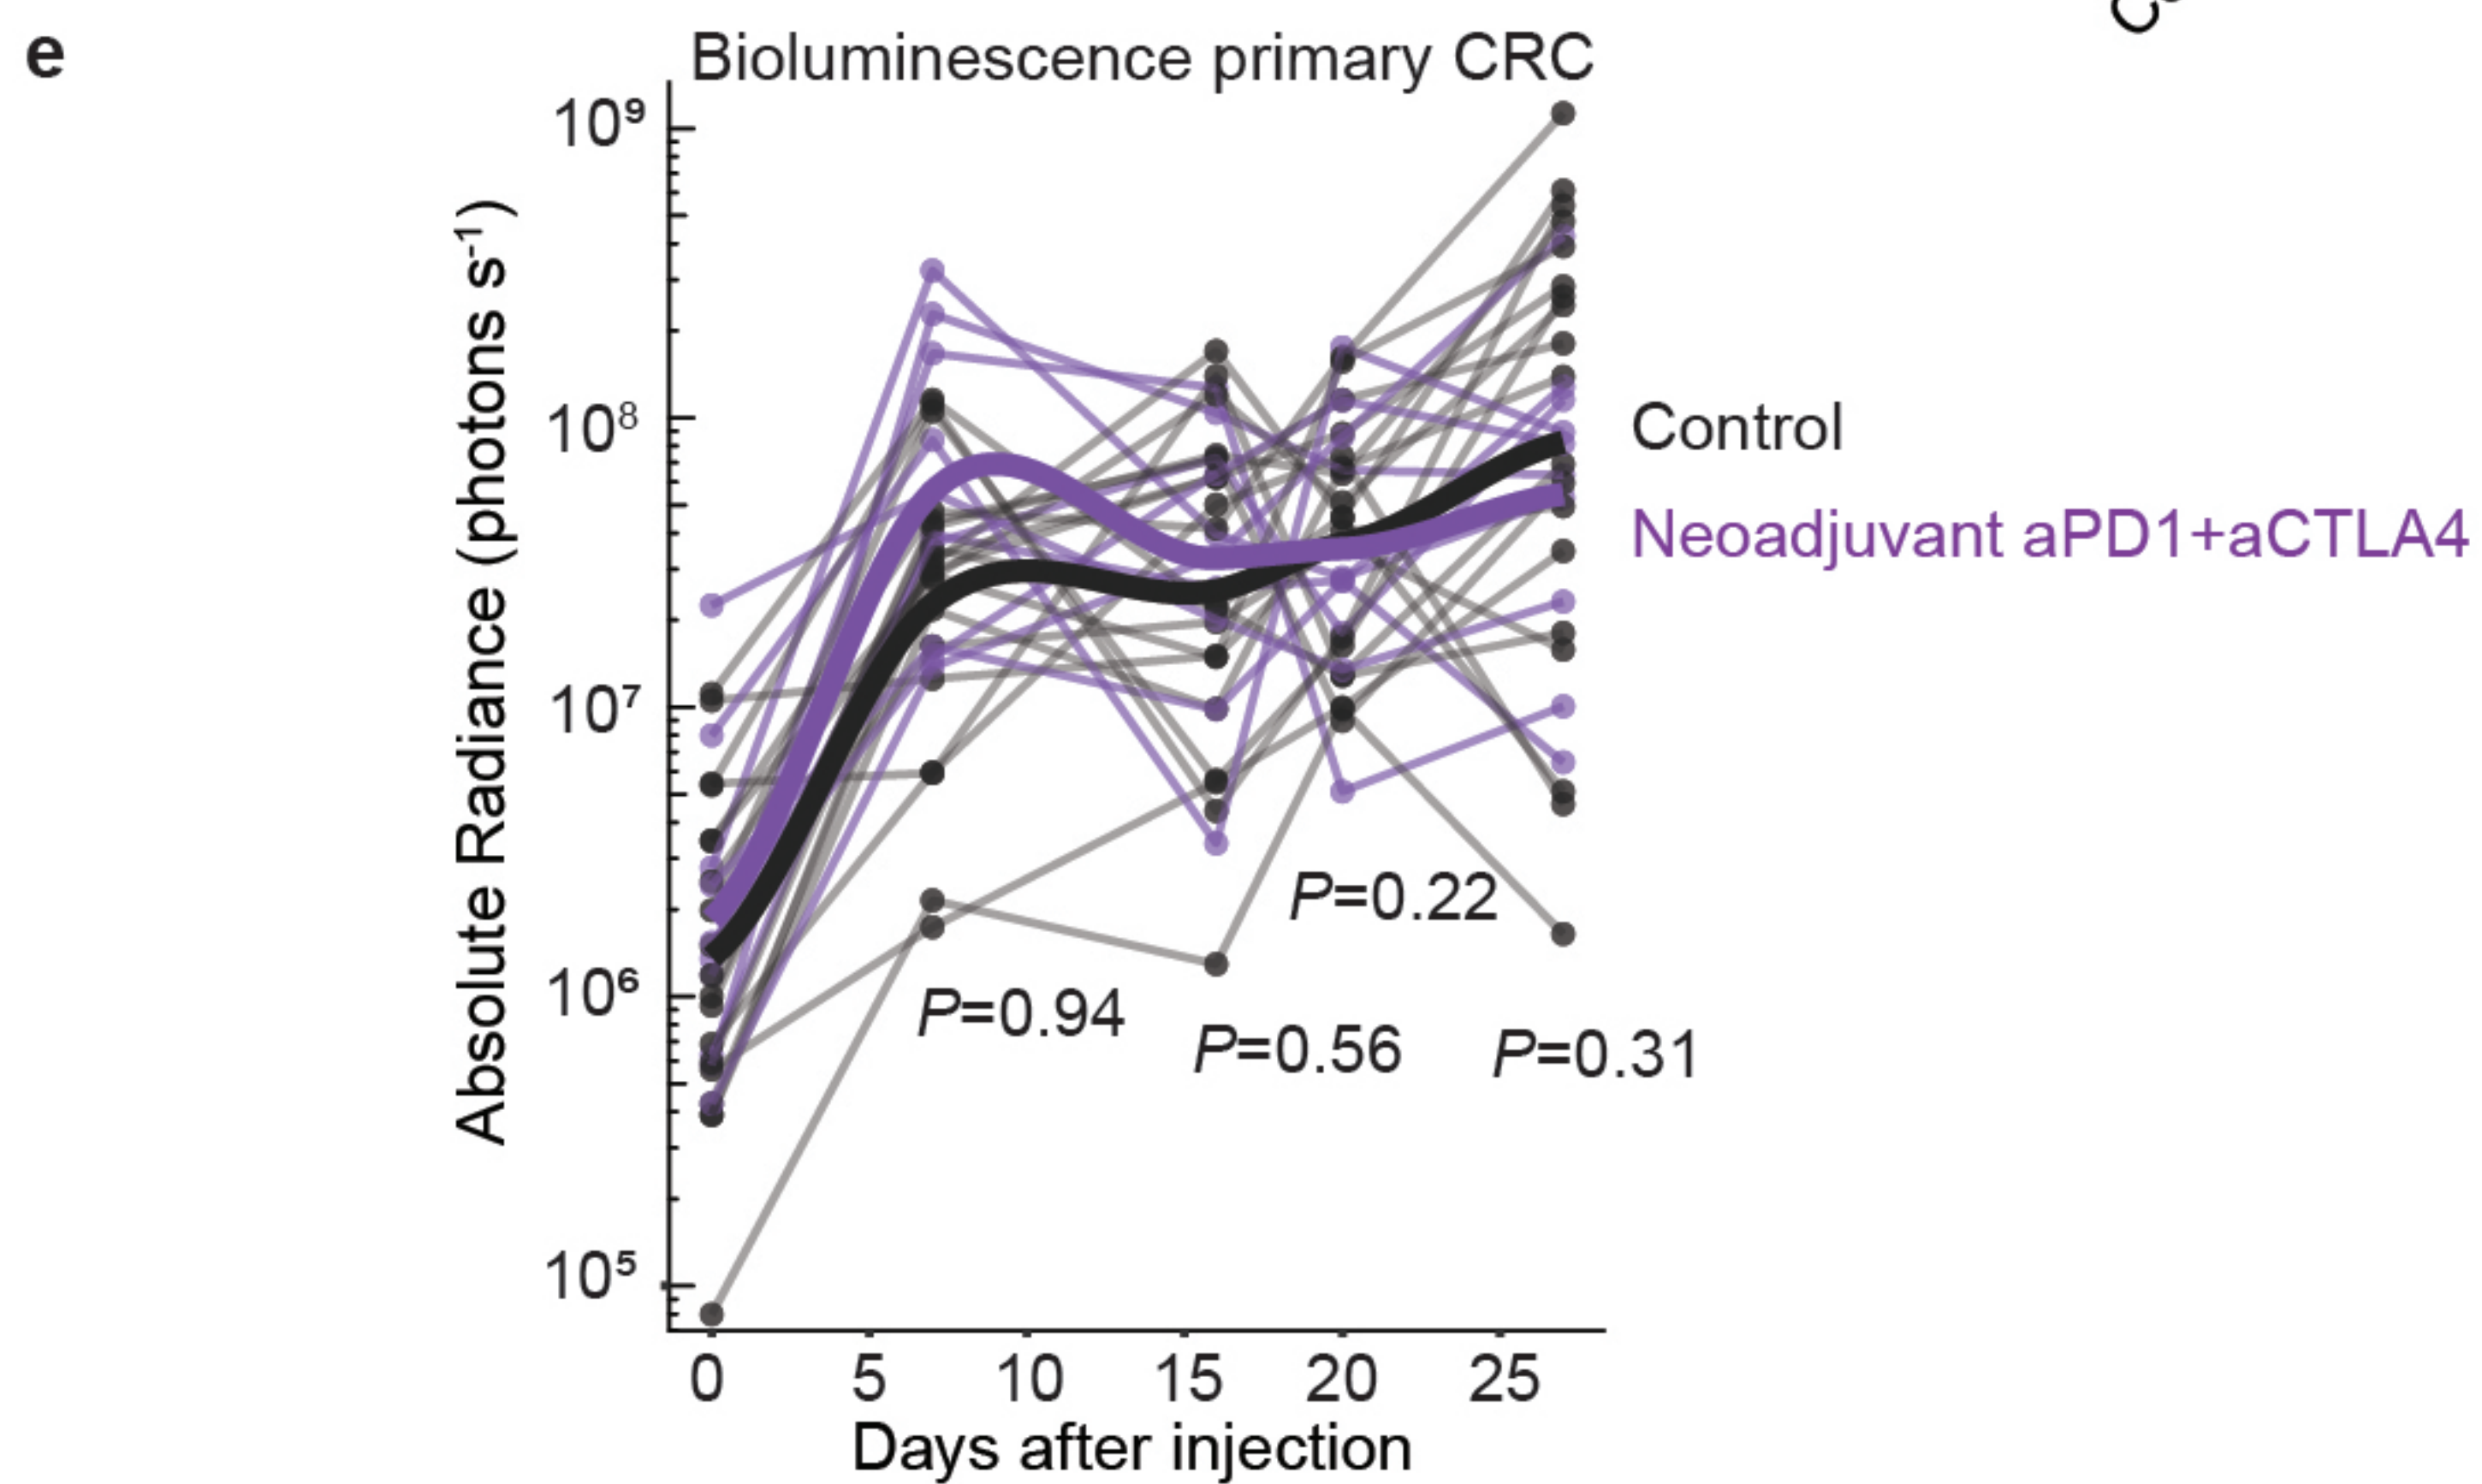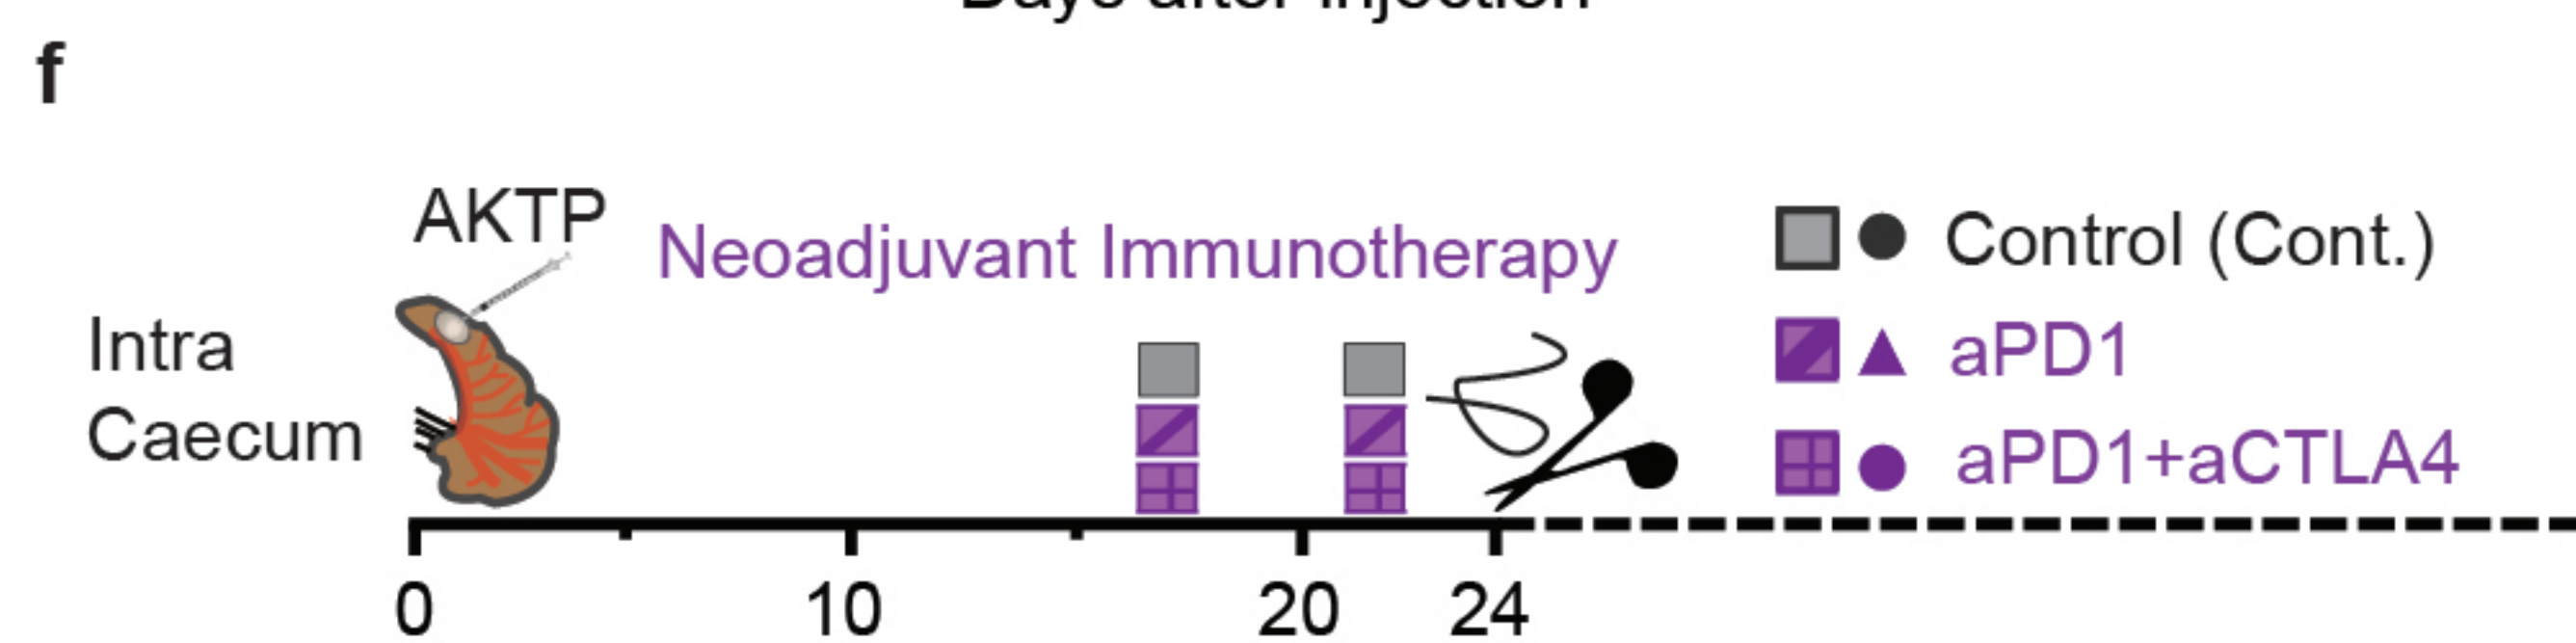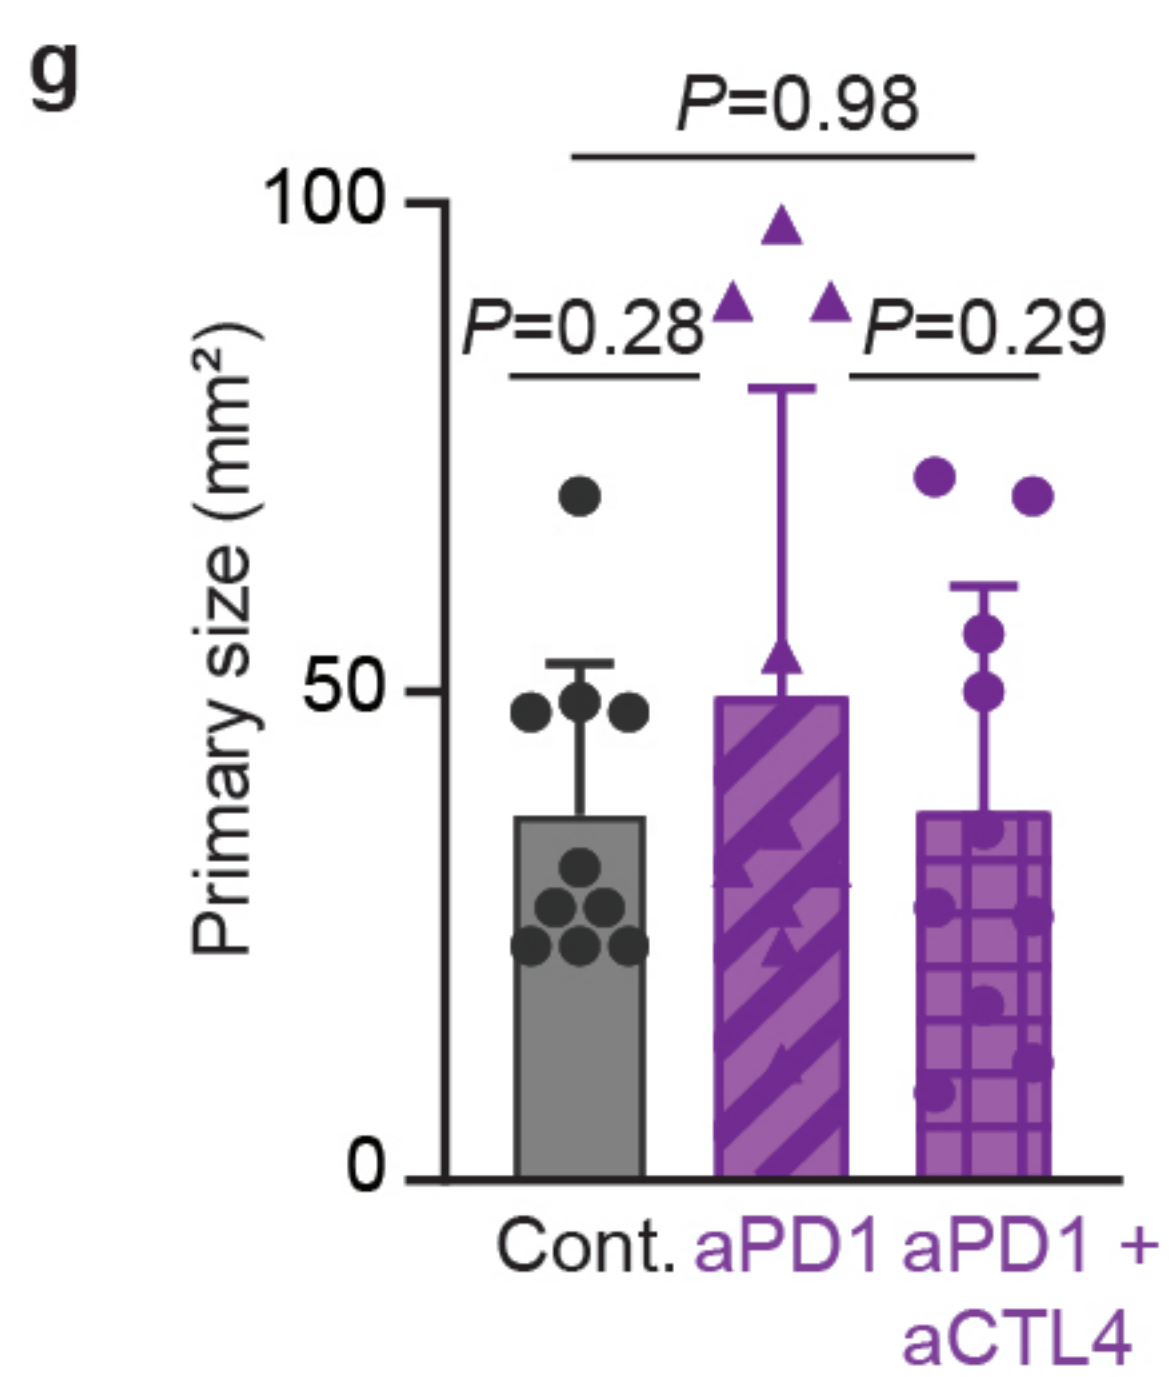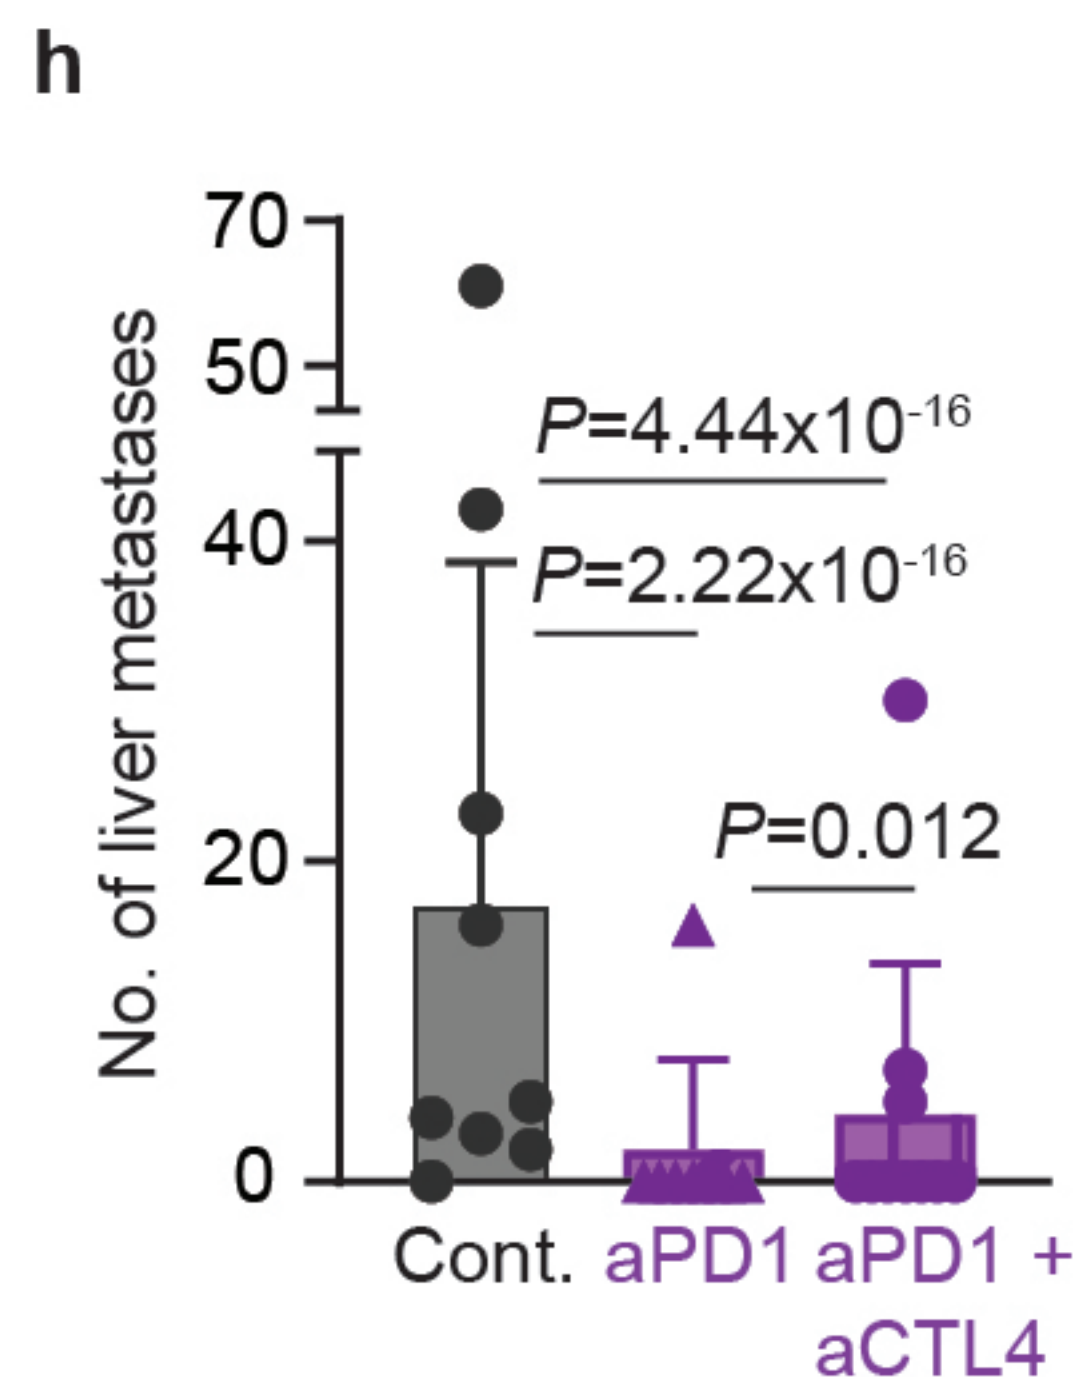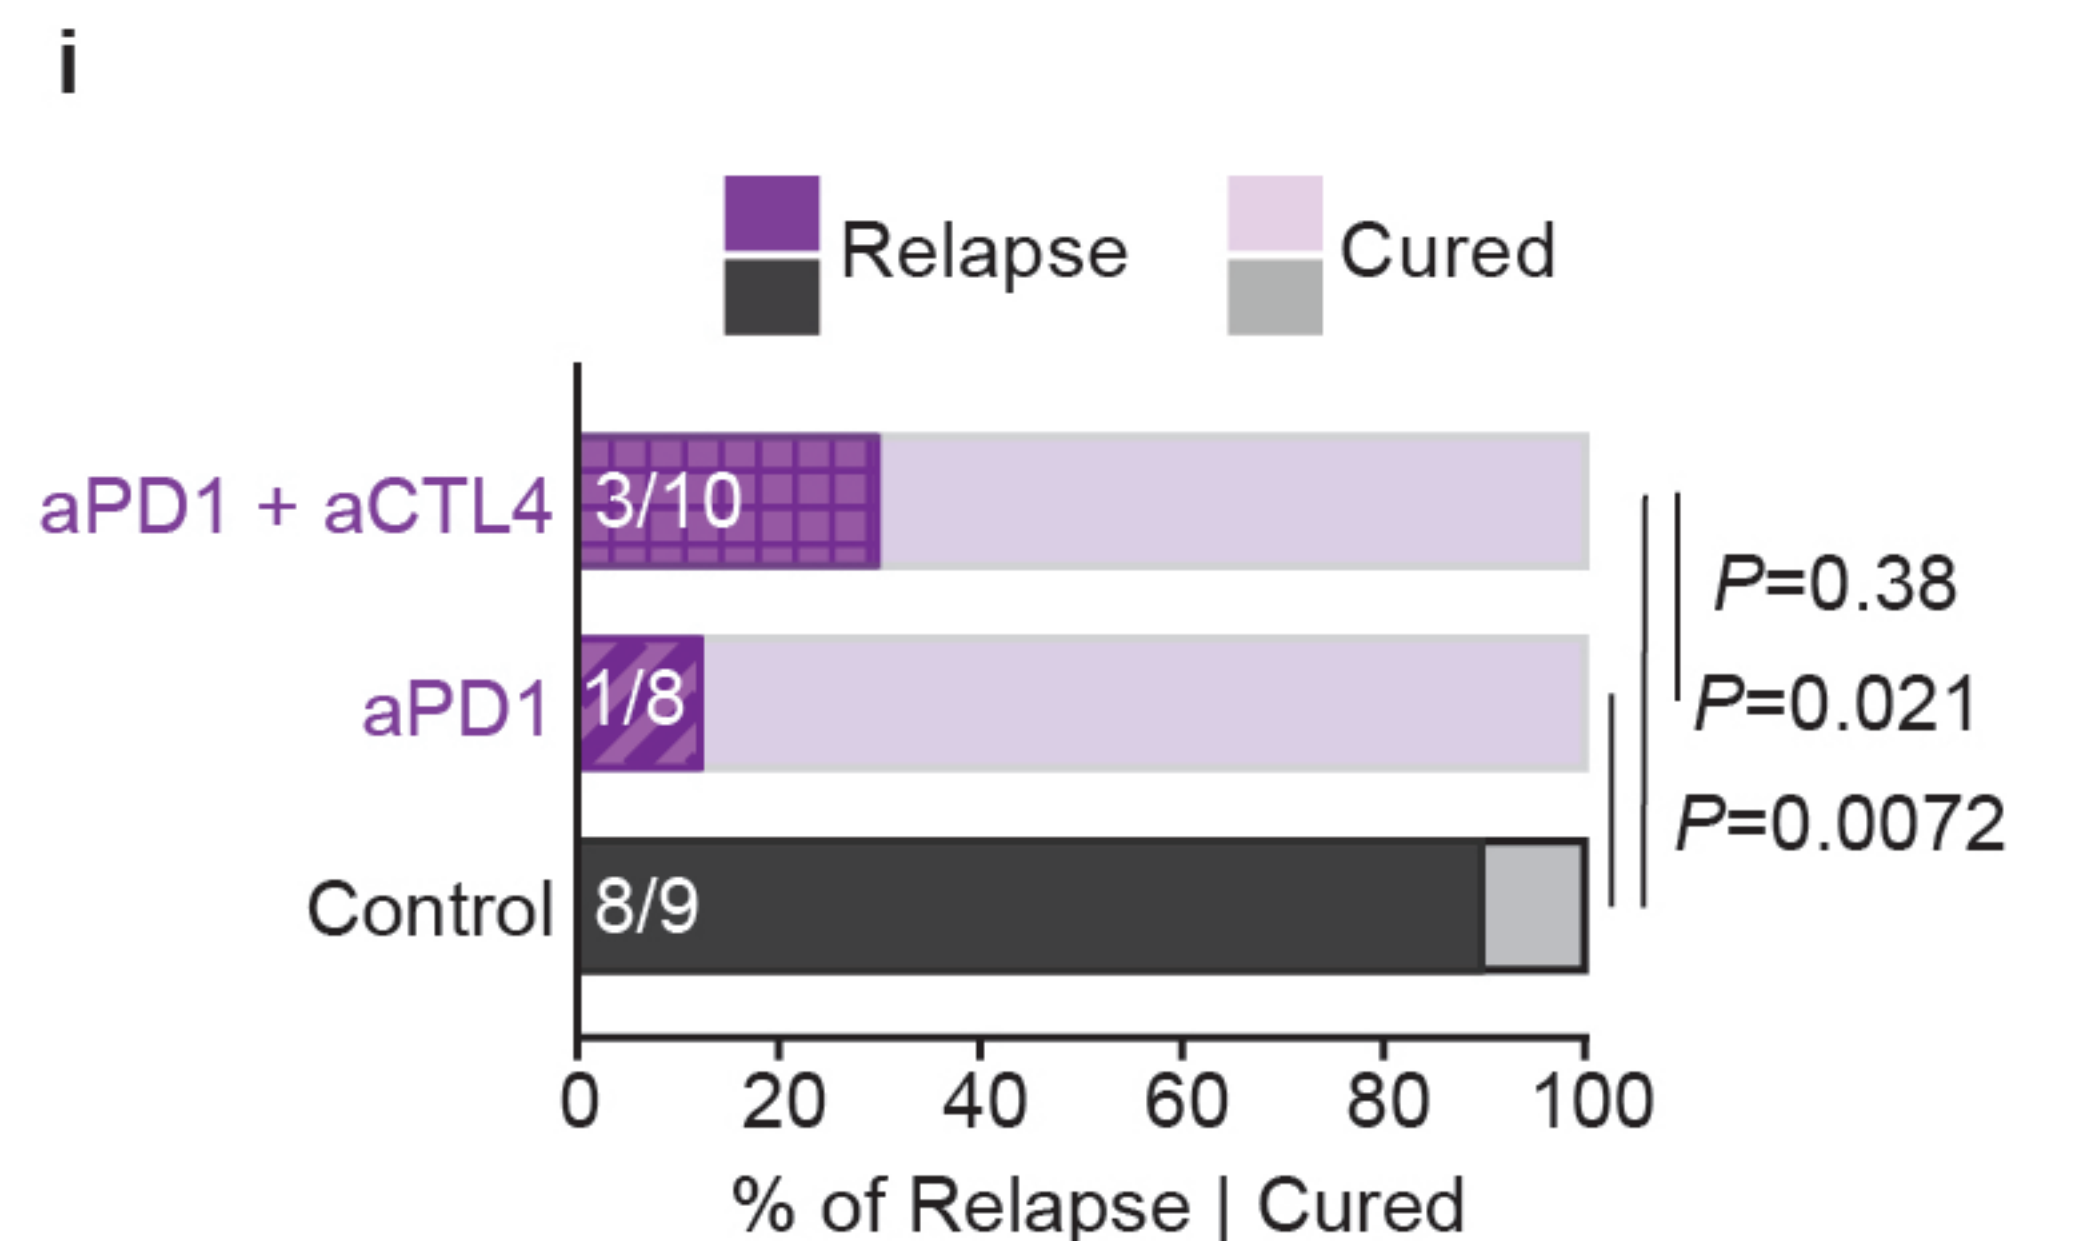

Main Figures together

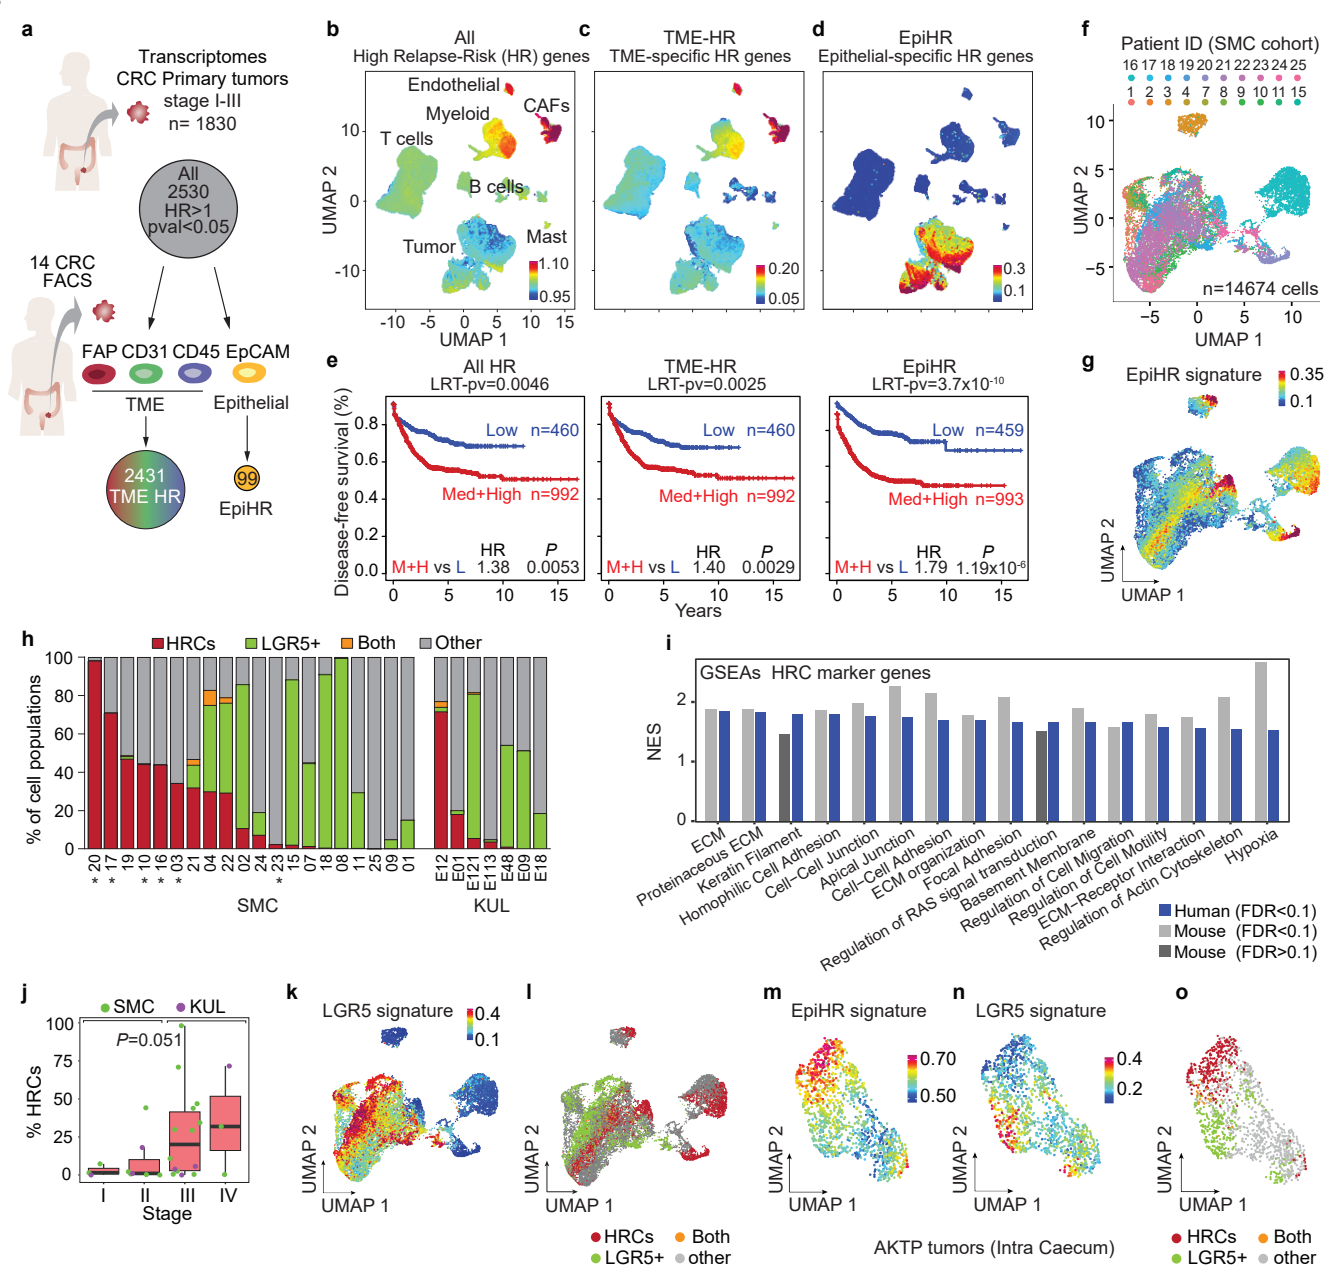

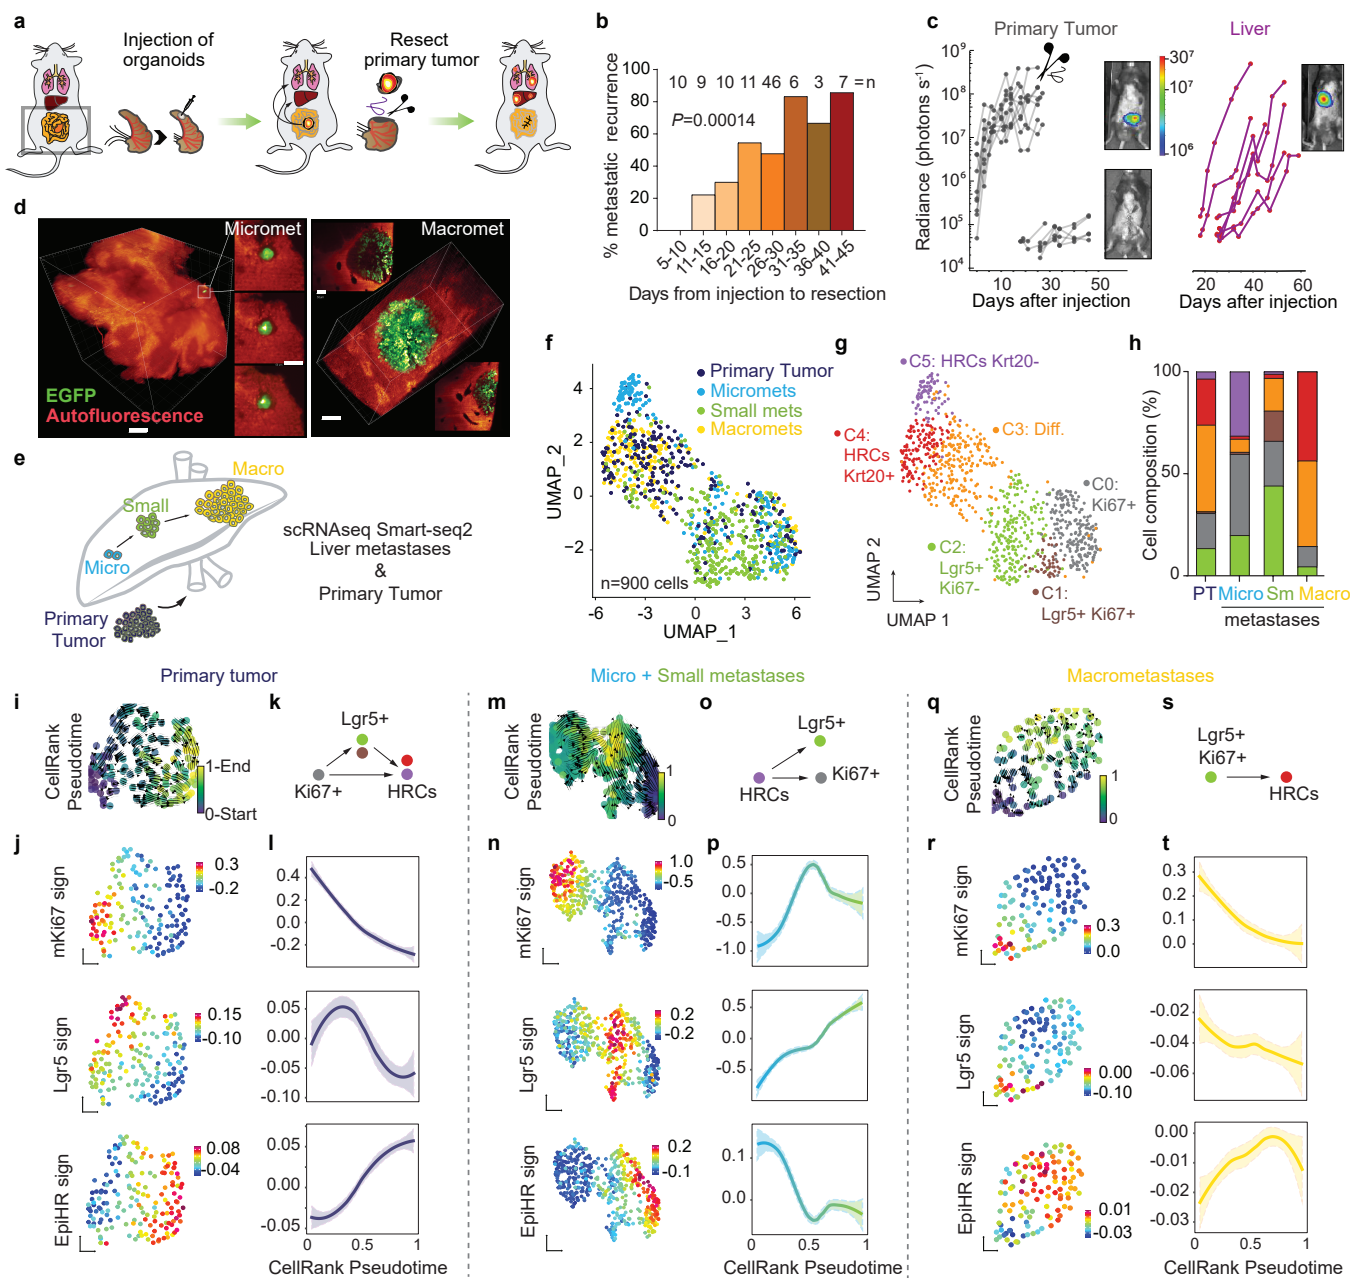

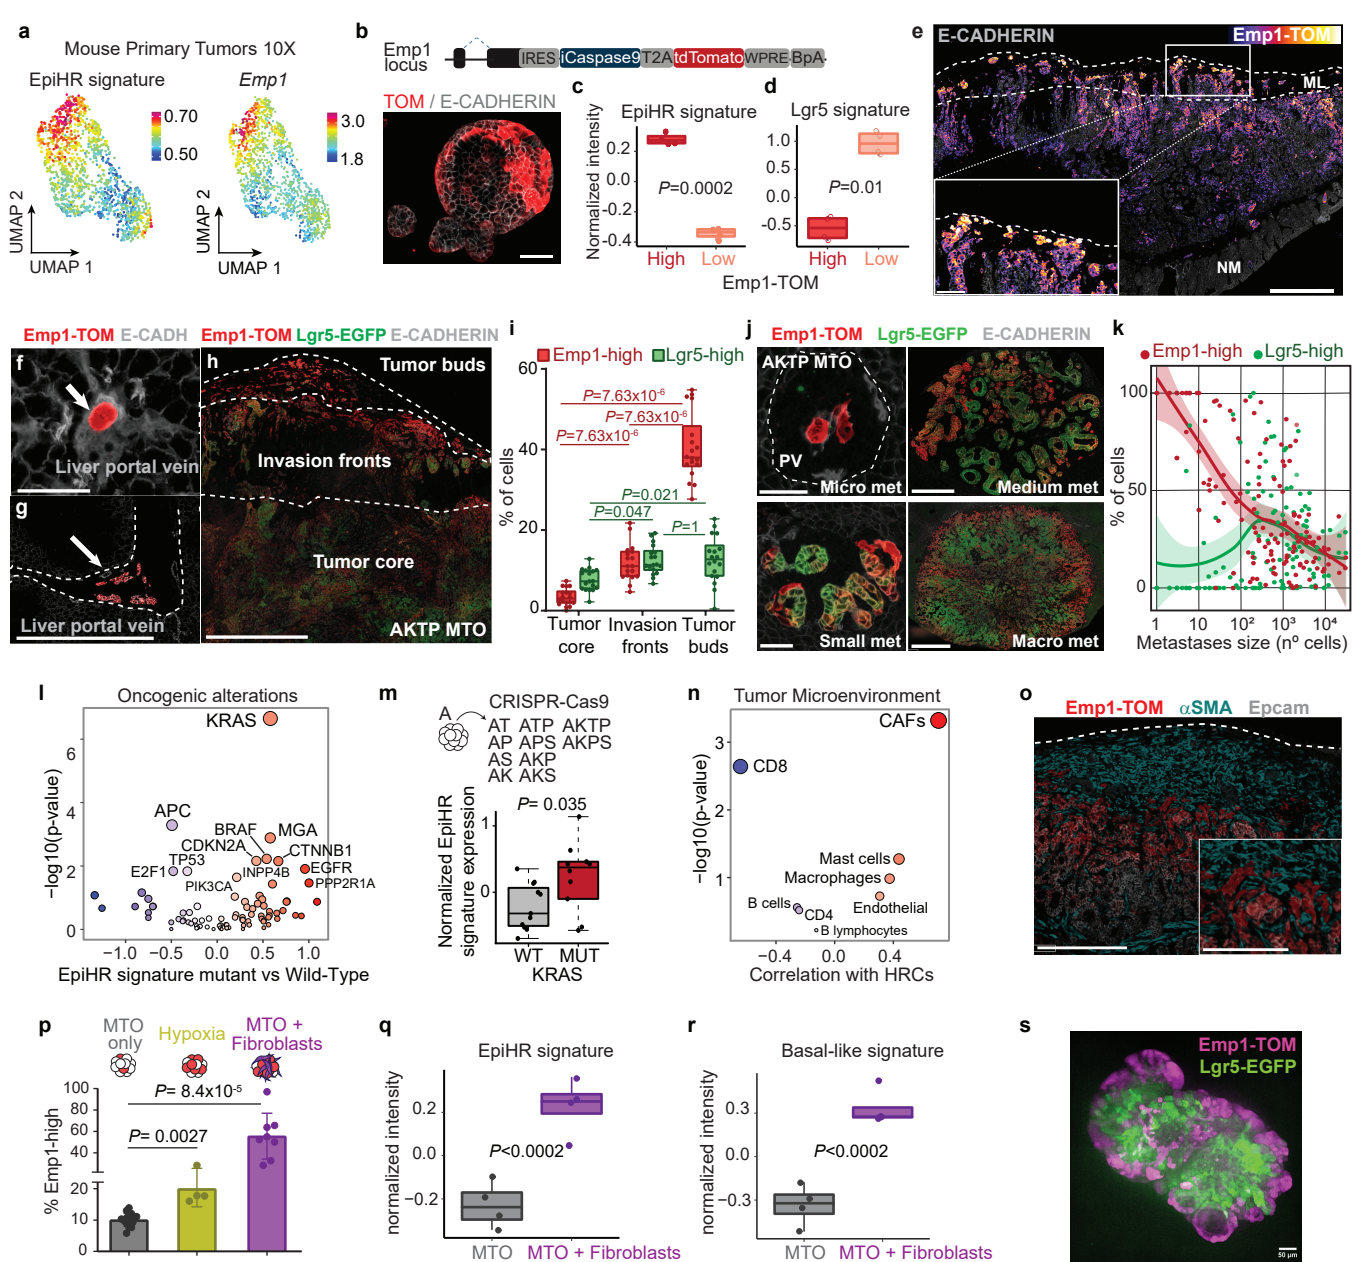

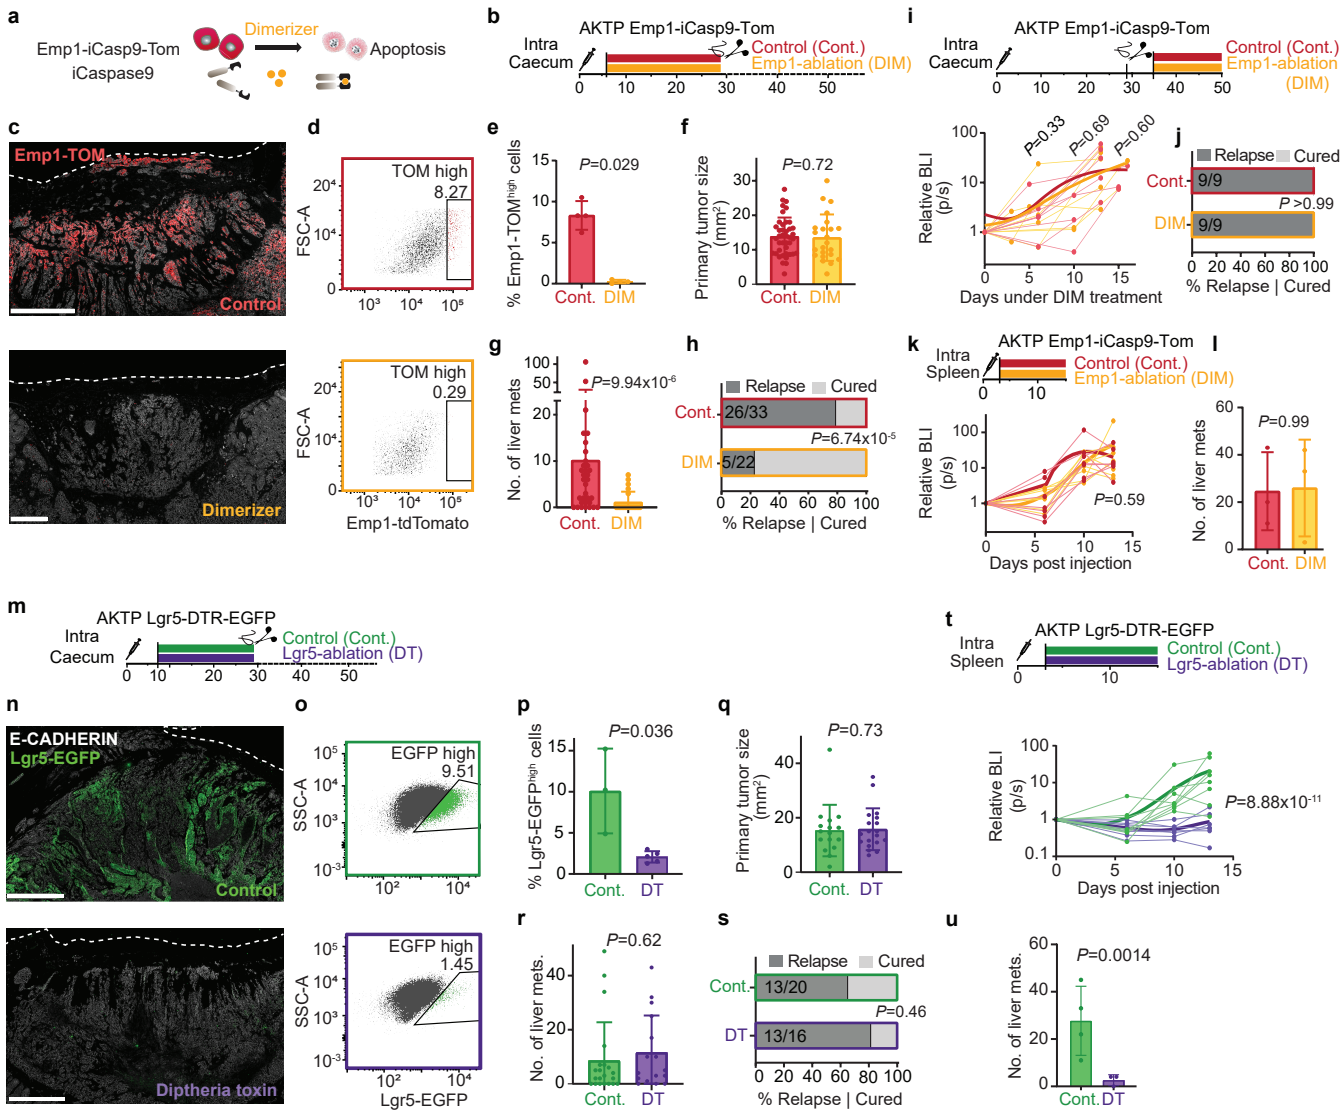



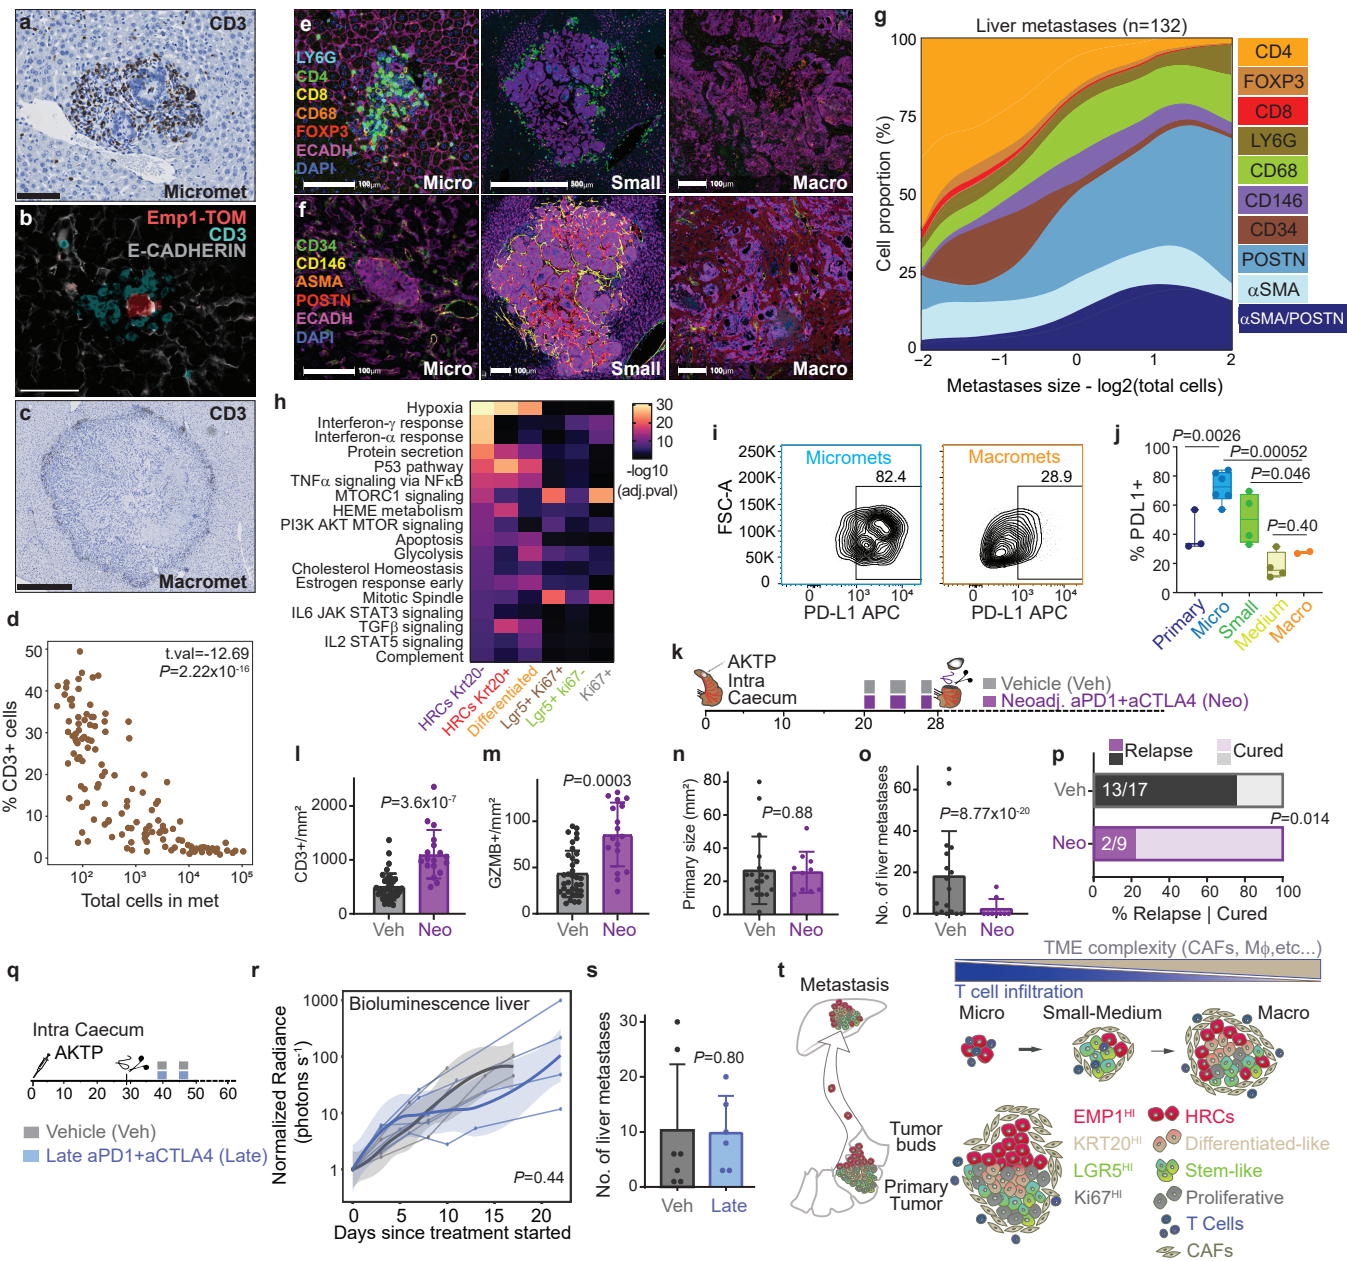

Supplementary Table 2. EpiHR and coreHRC signatures

Correlation with EpiHR

| gene       | mean_correlation_SMC_cohort | mean_correlation_KUL_cohort | epiHR | cluster (Ext data Fig 1h) | core_HRC |
|------------|-----------------------------|-----------------------------|-------|---------------------------|----------|
| LAMB3      | 0,918653386                 | 0,861439026                 | 1     | cl1                       | 1        |
| SDCBP2     | 0,870061556                 | 0,823929125                 | 0     | N.A.                      | 1        |
| EMP1       | 0,869356026                 | 0,853861678                 | 0     | N.A.                      | 1        |
| EPS8L1     | 0,836992759                 | 0,856944919                 | 1     | cl1                       | 1        |
| JUP        | 0,829972039                 | 0,899397863                 | 0     | N.A.                      | 1        |
| LMO7       | 0,823560828                 | 0,812490924                 | 1     | cl1                       | 1        |
| MYOF       | 0,822877259                 | 0,74822594                  | 0     | N.A.                      | 1        |
| ITGB4      | 0,822413043                 | 0,899083395                 | 0     | N.A.                      | 1        |
| GPRC5A     | 0,818474231                 | 0,946567465                 | 1     | cl1                       | 1        |
| AHNAK      | 0,81310242                  | 0,830276862                 | 0     | N.A.                      | 1        |
| CAMK2N1    | 0,810238117                 | 0,862067215                 | 1     | cl1                       | 1        |
| C19orf33   | 0,8097437                   | 0,767690421                 | 1     | cl1                       | 1        |
| MYH14      | 0,809364727                 | 0,855092786                 | 0     | N.A.                      | 1        |
| CD55       | 0,80690352                  | 0,77916496                  | 0     | N.A.                      | 1        |
| RHOF       | 0,806003022                 | 0,637239125                 | 0     | N.A.                      | 1        |
| TMBIM1     | 0,802892765                 | 0,908537459                 | 0     | N.A.                      | 1        |
| SEMA3B     | 0,800274517                 | 0,887833564                 | 0     | N.A.                      | 1        |
| TINAGL1    | 0,791494665                 | 0,779612514                 | 0     | N.A.                      | 1        |
| MISP       | 0,785808519                 | 0,866383456                 | 0     | N.A.                      | 1        |
| COL17A1    | 0,784847953                 | 0,831061603                 | 1     | cl1                       | 1        |
| PLEC       | 0,783177503                 | 0,845630555                 | 0     | N.A.                      | 1        |
| TSPAN1     | 0,771369807                 | 0,816608635                 | 0     | N.A.                      | 1        |
| ABHD11-AS1 | 0,770624757                 | 0,776251399                 | 0     | N.A.                      | 1        |
| PTPRH      | 0,767578857                 | 0,743807169                 | 0     | N.A.                      | 1        |
| CRB3       | 0,764646664                 | 0,798754211                 | 0     | N.A.                      | 1        |
| ITGA3      | 0,76369857                  | 0,922465825                 | 1     | cl1                       | 1        |
| RIOK3      | 0,762565768                 | 0,756617101                 | 0     | N.A.                      | 1        |
| LAMC2      | 0,761827702                 | 0,905559464                 | 1     | cl1                       | 1        |
| CYP3A5     | 0,760263416                 | 0,819324022                 | 0     | N.A.                      | 1        |

|                 |                    |                    |          |            |          |
|-----------------|--------------------|--------------------|----------|------------|----------|
| FA2H            | 0,757944389        | 0,757118121        | 0        | N.A.       | 1        |
| RRAS            | 0,757487095        | 0,804626606        | 0        | N.A.       | 1        |
| MUC13           | 0,755270309        | 0,791379923        | 0        | N.A.       | 1        |
| CEACAM1         | 0,755035049        | 0,848885407        | 0        | N.A.       | 1        |
| TMPRSS2         | 0,754313468        | 0,753969711        | 0        | N.A.       | 1        |
| SERINC2         | 0,754152646        | 0,817795977        | 0        | N.A.       | 1        |
| SLC44A4         | 0,752518672        | 0,656279333        | 0        | N.A.       | 1        |
| PCDH1           | 0,752337117        | 0,845915809        | 0        | N.A.       | 1        |
| USP53           | 0,747713417        | 0,686489812        | 0        | N.A.       | 1        |
| C1orf106        | 0,747662691        | 0,888007035        | 0        | N.A.       | 1        |
| FLNB            | 0,746497922        | 0,79819095         | 0        | N.A.       | 1        |
| CXCL16          | 0,744205325        | 0,736461602        | 0        | N.A.       | 1        |
| EZR             | 0,741632706        | 0,857506788        | 0        | N.A.       | 1        |
| <b>TNFRSF21</b> | <b>0,738220623</b> | <b>0,740539549</b> | <b>1</b> | <b>cl1</b> | <b>1</b> |
| CDA             | 0,737916406        | 0,804733531        | 0        | N.A.       | 1        |
| ADAM9           | 0,730916623        | 0,856877216        | 0        | N.A.       | 1        |
| RNF103          | 0,728303109        | 0,486469264        | 0        | N.A.       | 1        |
| <b>KRT80</b>    | <b>0,72743271</b>  | <b>0,78670345</b>  | <b>1</b> | <b>cl1</b> | <b>1</b> |
| EFNB1           | 0,726904417        | 0,799497428        | 0        | N.A.       | 1        |
| SMAD3           | 0,725842808        | 0,7311038          | 0        | N.A.       | 1        |
| PDZK1IP1        | 0,724035065        | 0,721319521        | 0        | N.A.       | 1        |
| LRP10           | 0,723782727        | 0,806901391        | 0        | N.A.       | 1        |
| <b>PRSS22</b>   | <b>0,721948755</b> | <b>0,898367891</b> | <b>1</b> | <b>cl1</b> | <b>1</b> |
| AHNAK2          | 0,720598585        | 0,794526483        | 0        | N.A.       | 1        |
| B4GALT1         | 0,720192625        | 0,516047798        | 0        | N.A.       | 1        |
| ANXA11          | 0,718159193        | 0,789630652        | 0        | N.A.       | 1        |
| BAIAP2L1        | 0,71727505         | 0,663589727        | 0        | N.A.       | 1        |
| F11R            | 0,717251787        | 0,786237991        | 0        | N.A.       | 1        |
| DUSP5           | 0,715463655        | 0,670896026        | 0        | N.A.       | 1        |
| <b>DDR1</b>     | <b>0,715281511</b> | <b>0,680808704</b> | <b>1</b> | <b>cl1</b> | <b>1</b> |
| ITGB1           | 0,712882098        | 0,711200456        | 0        | N.A.       | 1        |
| <b>SLC2A1</b>   | <b>0,711780311</b> | <b>0,850531314</b> | <b>1</b> | <b>cl1</b> | <b>1</b> |
| CDKN2B          | 0,711741628        | 0,732315104        | 0        | N.A.       | 1        |

|             |             |             |   |      |   |
|-------------|-------------|-------------|---|------|---|
| PLAUR       | 0,710314441 | 0,709668478 | 0 | N.A. | 1 |
| ITGA2       | 0,709881919 | 0,772861781 | 0 | N.A. | 1 |
| CDCP1       | 0,708977938 | 0,828555373 | 0 | N.A. | 1 |
| CD59        | 0,708669898 | 0,713700024 | 0 | N.A. | 1 |
| DSG2        | 0,70853198  | 0,769673499 | 0 | N.A. | 1 |
| KLK10       | 0,708278231 | 0,863073385 | 1 | cl1  | 1 |
| ARFGAP3     | 0,707661508 | 0,749148046 | 0 | N.A. | 1 |
| CD68        | 0,707248274 | 0,558115661 | 0 | N.A. | 1 |
| CGN         | 0,70575851  | 0,822156848 | 0 | N.A. | 1 |
| TM4SF1      | 0,705057034 | 0,784856608 | 0 | N.A. | 1 |
| PPP2CB      | 0,704963604 | 0,67509898  | 0 | N.A. | 1 |
| HEBP2       | 0,703978349 | 0,741815551 | 0 | N.A. | 1 |
| UGCG        | 0,703955227 | 0,473611497 | 0 | N.A. | 1 |
| GBP3        | 0,703710221 | 0,662409289 | 0 | N.A. | 1 |
| TIMP2       | 0,701193378 | 0,683523798 | 0 | N.A. | 1 |
| PINK1       | 0,701133054 | 0,662597026 | 0 | N.A. | 1 |
| CYSTM1      | 0,700765159 | 0,535818109 | 0 | N.A. | 1 |
| SLC6A8      | 0,700072171 | 0,784960057 | 0 | N.A. | 1 |
| PPARD       | 0,699813197 | 0,421439735 | 0 | N.A. | 1 |
| LIPH        | 0,6987803   | 0,791527997 | 0 | N.A. | 1 |
| CLIC3       | 0,698171106 | 0,864836063 | 0 | N.A. | 1 |
| SPINT1      | 0,698021957 | 0,865446495 | 1 | cls3 | 1 |
| PTK6        | 0,697775229 | 0,744819452 | 0 | N.A. | 1 |
| TJP3        | 0,697641745 | 0,791192001 | 0 | N.A. | 1 |
| STK24       | 0,696212151 | 0,815624092 | 0 | N.A. | 1 |
| AC009133.12 | 0,695725517 | 0,570300342 | 0 | N.A. | 1 |
| CEACAM5     | 0,695434213 | 0,716394721 | 0 | N.A. | 1 |
| MXD1        | 0,695423592 | 0,622895742 | 0 | N.A. | 1 |
| SNX9        | 0,694845139 | 0,703349506 | 0 | N.A. | 1 |
| ERO1L       | 0,694369584 | 0,81619661  | 0 | N.A. | 1 |
| SSFA2       | 0,693021808 | 0,670818297 | 0 | N.A. | 1 |
| TSPAN3      | 0,691835542 | 0,744709847 | 0 | N.A. | 1 |
| SLPI        | 0,691534114 | 0,822569433 | 1 | cls3 | 1 |

|          |             |             |   |      |   |
|----------|-------------|-------------|---|------|---|
| BMP2     | 0,691503031 | 0,645618766 | 0 | N.A. | 1 |
| GJB3     | 0,690683474 | 0,803749668 | 1 | cl1  | 1 |
| LAMA3    | 0,688601269 | 0,833874229 | 1 | cl1  | 1 |
| TMPRSS4  | 0,687531791 | 0,770908911 | 0 | N.A. | 1 |
| B4GALNT3 | 0,687261423 | 0,539818172 | 0 | N.A. | 1 |
| TNIP1    | 0,686091907 | 0,649657294 | 0 | N.A. | 0 |
| CDHR5    | 0,685947514 | 0,806702298 | 0 | N.A. | 0 |
| POLD4    | 0,683756701 | 0,592071689 | 0 | N.A. | 0 |
| GDA      | 0,68126987  | 0,657050931 | 0 | N.A. | 0 |
| MSLN     | 0,681201908 | 0,860456436 | 1 | cl1  | 0 |
| CD2AP    | 0,681187072 | 0,570274786 | 0 | N.A. | 0 |
| APOL1    | 0,680629823 | 0,671955319 | 0 | N.A. | 0 |
| GCNT3    | 0,68050076  | 0,83639611  | 0 | N.A. | 0 |
| PTTG1IP  | 0,680458919 | 0,838608132 | 0 | N.A. | 0 |
| RHOC     | 0,680332425 | 0,661967309 | 0 | N.A. | 0 |
| LMTK3    | 0,679279598 | 0,7270276   | 0 | N.A. | 0 |
| SLC16A3  | 0,677863333 | 0,815273476 | 0 | N.A. | 0 |
| FAM129B  | 0,676259772 | 0,79945779  | 0 | N.A. | 0 |
| TRIM31   | 0,676033911 | 0,693609344 | 0 | N.A. | 0 |
| PVRL2    | 0,675983023 | 0,880691491 | 0 | N.A. | 0 |
| CDHR2    | 0,67423523  | 0,624907184 | 0 | N.A. | 0 |
| BCL2L1   | 0,674174256 | 0,792951942 | 0 | N.A. | 0 |
| ISG20    | 0,674131165 | 0,6793177   | 0 | N.A. | 0 |
| KCNK1    | 0,672218063 | 0,732755152 | 0 | N.A. | 0 |
| NEAT1    | 0,672079523 | 0,663478681 | 0 | N.A. | 0 |
| MYO1E    | 0,67118211  | 0,724283764 | 0 | N.A. | 0 |
| IFNGR2   | 0,670728991 | 0,277270784 | 0 | N.A. | 0 |
| MET      | 0,670354381 | 0,741349565 | 0 | N.A. | 0 |
| CDH1     | 0,670253265 | 0,6889997   | 0 | N.A. | 0 |
| DST      | 0,669875081 | 0,742755296 | 0 | N.A. | 0 |
| EPS8     | 0,669428419 | 0,572285257 | 0 | N.A. | 0 |
| ANGPTL4  | 0,669316822 | 0,298592036 | 0 | N.A. | 0 |
| PLCD3    | 0,668227814 | 0,49029887  | 0 | N.A. | 0 |

|           |             |             |   |      |   |
|-----------|-------------|-------------|---|------|---|
| PLXNB2    | 0,667393479 | 0,82204746  | 0 | N.A. | 0 |
| DSC2      | 0,666774481 | 0,856581948 | 0 | N.A. | 0 |
| ACHE      | 0,666065257 | 0,587080845 | 0 | N.A. | 0 |
| ARHGAP27  | 0,665851496 | 0,752870085 | 0 | N.A. | 0 |
| CTNND1    | 0,665763066 | 0,761283738 | 0 | N.A. | 0 |
| CLIC5     | 0,665482102 | 0,547627382 | 0 | N.A. | 0 |
| PHLDA3    | 0,664397509 | 0,490143529 | 0 | N.A. | 0 |
| SDC4      | 0,664333157 | 0,69606919  | 0 | N.A. | 0 |
| HEPH      | 0,664084479 | 0,709072592 | 0 | N.A. | 0 |
| MALL      | 0,664003639 | 0,828369983 | 0 | N.A. | 0 |
| MTMR11    | 0,663035767 | 0,601760605 | 0 | N.A. | 0 |
| OPTN      | 0,662401638 | 0,668640443 | 0 | N.A. | 0 |
| KRT19     | 0,662218606 | 0,839990568 | 1 | cl1  | 0 |
| UBE2H     | 0,661972582 | 0,630464711 | 0 | N.A. | 0 |
| F2RL1     | 0,660333588 | 0,698020861 | 0 | N.A. | 0 |
| RHBDF1    | 0,660189233 | 0,66554889  | 0 | N.A. | 0 |
| QSOX1     | 0,659977425 | 0,682224629 | 0 | N.A. | 0 |
| PSORS1C1  | 0,659589035 | 0,226412934 | 1 | cl1  | 0 |
| LINC01559 | 0,659380732 | 0,720203186 | 0 | N.A. | 0 |
| CYP4F3    | 0,658374024 | 0,760349625 | 0 | N.A. | 0 |
| SVIL      | 0,658118759 | 0,633618197 | 0 | N.A. | 0 |
| PMEPA1    | 0,656754006 | 0,681379768 | 0 | N.A. | 0 |
| ITGB6     | 0,65531266  | 0,701304434 | 0 | N.A. | 0 |
| FUT3      | 0,655088375 | 0,681646116 | 0 | N.A. | 0 |
| ESYT2     | 0,654707007 | 0,518821211 | 0 | N.A. | 0 |
| EFHD2     | 0,654263575 | 0,728375511 | 0 | N.A. | 0 |
| PNPLA2    | 0,65411932  | 0,73446483  | 1 | cl1  | 0 |
| ACTN4     | 0,653177873 | 0,807135668 | 0 | N.A. | 0 |
| FSTL3     | 0,652951952 | 0,533152881 | 0 | N.A. | 0 |
| ARRDC4    | 0,651699008 | 0,508919275 | 0 | N.A. | 0 |
| CAB39     | 0,651213853 | 0,725662103 | 0 | N.A. | 0 |
| CDC42EP2  | 0,650179896 | 0,533095512 | 0 | N.A. | 0 |
| JOSD1     | 0,6490135   | 0,651799563 | 0 | N.A. | 0 |

|             |             |             |   |      |   |
|-------------|-------------|-------------|---|------|---|
| C1orf116    | 0,648148997 | 0,801114373 | 1 | cl1  | 0 |
| KLF3        | 0,647910113 | 0,695737606 | 0 | N.A. | 0 |
| HHLA2       | 0,647113561 | 0,599462503 | 0 | N.A. | 0 |
| GJB4        | 0,646889036 | 0,747849462 | 0 | N.A. | 0 |
| CHP1        | 0,64646967  | 0,67947353  | 0 | N.A. | 0 |
| RP11-465N4. | 0,64473825  | 0,501170179 | 0 | N.A. | 0 |
| PRSS3       | 0,64405935  | 0,736547646 | 0 | N.A. | 0 |
| ST14        | 0,643056902 | 0,65731654  | 0 | N.A. | 0 |
| AGPAT2      | 0,642233603 | 0,569678991 | 0 | N.A. | 0 |
| TNFRSF12A   | 0,640872721 | 0,741069309 | 0 | N.A. | 0 |
| OAS1        | 0,640844028 | 0,49590937  | 0 | N.A. | 0 |
| NPEPPS      | 0,63941055  | 0,609905754 | 0 | N.A. | 0 |
| CLTB        | 0,638743348 | 0,678857202 | 0 | N.A. | 0 |
| AKAP12      | 0,638283854 | 0,567908723 | 0 | N.A. | 0 |
| ARHGAP21    | 0,638232959 | 0,772948939 | 0 | N.A. | 0 |
| YWHAZ       | 0,638062873 | 0,322077845 | 0 | N.A. | 0 |
| SGMS2       | 0,637297923 | 0,638653748 | 0 | N.A. | 0 |
| SPINT2      | 0,636872608 | 0,703692876 | 0 | N.A. | 0 |
| UNC13D      | 0,636066951 | 0,629868986 | 0 | N.A. | 0 |
| TOR4A       | 0,635894494 | 0,560529488 | 0 | N.A. | 0 |
| BHLHE40     | 0,635184009 | 0,747613268 | 0 | N.A. | 0 |
| TMC5        | 0,635141373 | 0,611435314 | 0 | N.A. | 0 |
| YOD1        | 0,634977949 | 0,320326751 | 0 | N.A. | 0 |
| FOSL2       | 0,634824072 | 0,724471869 | 0 | N.A. | 0 |
| CCDC64B     | 0,634725481 | 0,658489397 | 0 | N.A. | 0 |
| UPP1        | 0,634532311 | 0,519063878 | 0 | N.A. | 0 |
| KIAA1522    | 0,633984971 | 0,746945582 | 0 | N.A. | 0 |
| PLIN3       | 0,6338953   | 0,536155184 | 0 | N.A. | 0 |
| TGFA        | 0,633490066 | 0,676489342 | 0 | N.A. | 0 |
| ZFAND3      | 0,632570504 | 0,34500798  | 0 | N.A. | 0 |
| PDLIM5      | 0,63257024  | 0,567099512 | 0 | N.A. | 0 |
| BRI3        | 0,632072257 | 0,624146898 | 0 | N.A. | 0 |
| S100P       | 0,631007826 | 0,572528726 | 0 | N.A. | 0 |

|            |             |             |   |      |   |
|------------|-------------|-------------|---|------|---|
| OASL       | 0,629876215 | 0,364956683 | 0 | N.A. | 0 |
| TMEM92     | 0,629657317 | 0,600300371 | 0 | N.A. | 0 |
| EFNB2      | 0,628292025 | 0,792986759 | 0 | N.A. | 0 |
| TMCC3      | 0,628021025 | 0,628633883 | 0 | N.A. | 0 |
| RHPN2      | 0,627874428 | 0,784610722 | 0 | N.A. | 0 |
| TMC6       | 0,627766908 | 0,707636507 | 0 | N.A. | 0 |
| VILL       | 0,627222606 | 0,635964569 | 0 | N.A. | 0 |
| ALS2CL     | 0,627187461 | 0,703680616 | 0 | N.A. | 0 |
| PTPN12     | 0,626486202 | 0,542514084 | 0 | N.A. | 0 |
| PIM1       | 0,626421211 | 0,38276505  | 0 | N.A. | 0 |
| GNG12      | 0,626032585 | 0,621903854 | 0 | N.A. | 0 |
| ELOVL1     | 0,625788555 | 0,855818265 | 0 | N.A. | 0 |
| MEF2D      | 0,625260758 | 0,45281226  | 0 | N.A. | 0 |
| AMN        | 0,624903602 | 0,623044229 | 0 | N.A. | 0 |
| RHOD       | 0,6243871   | 0,647021026 | 1 | cl1  | 0 |
| CDKN1A     | 0,624179654 | 0,599836341 | 0 | N.A. | 0 |
| C6orf132   | 0,624040054 | 0,734324168 | 0 | N.A. | 0 |
| PLXNA3     | 0,623820621 | 0,579709748 | 0 | N.A. | 0 |
| TICAM1     | 0,623251155 | 0,605788204 | 0 | N.A. | 0 |
| OCLN       | 0,623238779 | 0,719885561 | 0 | N.A. | 0 |
| MUC1       | 0,622964827 | 0,789950782 | 0 | N.A. | 0 |
| LPP        | 0,622963782 | 0,541677509 | 0 | N.A. | 0 |
| MIR4435-1H | 0,622856919 | 0,266590261 | 0 | N.A. | 0 |
| B3GALT4    | 0,622657101 | 0,540556513 | 0 | N.A. | 0 |
| TMEM127    | 0,622303181 | 0,613895749 | 0 | N.A. | 0 |
| EPB41L1    | 0,621012861 | 0,680309722 | 0 | N.A. | 0 |
| KRT7       | 0,62052748  | 0,49344304  | 0 | N.A. | 0 |
| MDFI       | 0,620301263 | 0,661086417 | 0 | N.A. | 0 |
| SPAG9      | 0,619845124 | 0,586168813 | 0 | N.A. | 0 |
| PAG1       | 0,619816796 | 0,477881681 | 0 | N.A. | 0 |
| C10orf54   | 0,619645145 | 0,543524008 | 0 | N.A. | 0 |
| TES        | 0,618478946 | 0,316376159 | 0 | N.A. | 0 |
| PTPRR      | 0,618226639 | 0,669482737 | 0 | N.A. | 0 |



|           |             |             |   |      |   |
|-----------|-------------|-------------|---|------|---|
| PICALM    | 0,617280533 | 0,484381728 | 0 | N.A. | 0 |
| AGRN      | 0,616486518 | 0,58215378  | 0 | N.A. | 0 |
| MIDN      | 0,61577993  | 0,798512339 | 0 | N.A. | 0 |
| LINC01133 | 0,615614944 | 0,769391976 | 0 | N.A. | 0 |
| PLS1      | 0,615008856 | 0,753358768 | 0 | N.A. | 0 |
| BCL9L     | 0,614942485 | 0,608557404 | 0 | N.A. | 0 |
| BACE2     | 0,613801702 | 0,654238358 | 0 | N.A. | 0 |
| TMEM63B   | 0,613252988 | 0,7653313   | 0 | N.A. | 0 |
| LEMD1     | 0,61288552  | 0,609721396 | 1 | cl1  | 0 |
| PRSS8     | 0,612528405 | 0,823433129 | 0 | N.A. | 0 |
| SLC20A1   | 0,612300639 | 0,736429202 | 1 | none | 0 |
| DSP       | 0,611277512 | 0,58170625  | 0 | N.A. | 0 |
| NDRG1     | 0,61124385  | 0,592440666 | 0 | N.A. | 0 |
| LLGL2     | 0,609141303 | 0,671587723 | 0 | N.A. | 0 |
| ECM1      | 0,609050179 | 0,712743171 | 0 | N.A. | 0 |
| MYO7B     | 0,608384501 | 0,56631935  | 0 | N.A. | 0 |
| LSR       | 0,607820261 | 0,773348846 | 0 | N.A. | 0 |
| C4BPB     | 0,607757598 | 0,500670027 | 0 | N.A. | 0 |
| P4HA2     | 0,607053896 | 0,707756761 | 0 | N.A. | 0 |
| PPP2R5B   | 0,606800021 | 0,622240268 | 0 | N.A. | 0 |
| EPHA2     | 0,605771301 | 0,772237831 | 1 | cl1  | 0 |
| CTSD      | 0,605741832 | 0,639560054 | 0 | N.A. | 0 |
| CEACAM6   | 0,605631848 | 0,762593525 | 0 | N.A. | 0 |
| GTPBP2    | 0,60518134  | 0,363238147 | 0 | N.A. | 0 |
| XDH       | 0,605000222 | 0,460237075 | 0 | N.A. | 0 |
| OXR1      | 0,604696861 | 0,504349295 | 0 | N.A. | 0 |
| SPTBN1    | 0,60457059  | 0,737804414 | 0 | N.A. | 0 |
| RASEF     | 0,60442152  | 0,630442052 | 0 | N.A. | 0 |
| CAST      | 0,603443421 | 0,72383654  | 0 | N.A. | 0 |
| SUN1      | 0,603234103 | 0,655950085 | 0 | N.A. | 0 |
| CAPG      | 0,60309413  | 0,582150425 | 0 | N.A. | 0 |
| MPRIIP    | 0,602824547 | 0,527812147 | 0 | N.A. | 0 |
| FEM1C     | 0,602800516 | 0,384174318 | 0 | N.A. | 0 |

|           |             |             |   |      |   |
|-----------|-------------|-------------|---|------|---|
| MYO5B     | 0,602217252 | 0,704987663 | 0 | N.A. | 0 |
| DOK4      | 0,601834665 | 0,733780704 | 0 | N.A. | 0 |
| IRF6      | 0,60182317  | 0,402765119 | 0 | N.A. | 0 |
| HK2       | 0,601561406 | 0,547777613 | 0 | N.A. | 0 |
| SLC20A2   | 0,601519717 | 0,565440781 | 0 | N.A. | 0 |
| PDCD6IP   | 0,600729891 | 0,718110341 | 0 | N.A. | 0 |
| FHL2      | 0,600489344 | 0,642430896 | 0 | N.A. | 0 |
| SLC9A1    | 0,599921304 | 0,719537139 | 0 | N.A. | 0 |
| APOL6     | 0,59990622  | 0,617065503 | 0 | N.A. | 0 |
| LBH       | 0,59983539  | 0,468636646 | 0 | N.A. | 0 |
| SQSTM1    | 0,599776162 | 0,627569811 | 0 | N.A. | 0 |
| CAPN2     | 0,599062063 | 0,728344053 | 0 | N.A. | 0 |
| MAFK      | 0,598894823 | 0,566808049 | 0 | N.A. | 0 |
| PCSK7     | 0,598295284 | 0,637923341 | 0 | N.A. | 0 |
| AIM1L     | 0,598241789 | 0,736103053 | 0 | N.A. | 0 |
| RAB5B     | 0,597768119 | 0,434473134 | 0 | N.A. | 0 |
| METRNL    | 0,597383003 | 0,508366761 | 0 | N.A. | 0 |
| PRRG1     | 0,597269895 | 0,227328658 | 0 | N.A. | 0 |
| IRF7      | 0,596574785 | 0,636158157 | 0 | N.A. | 0 |
| SLK       | 0,596343576 | 0,677444941 | 0 | N.A. | 0 |
| TP53INP2  | 0,595857843 | 0,690027993 | 0 | N.A. | 0 |
| PRDM1     | 0,595762086 | 0,220670586 | 0 | N.A. | 0 |
| B4GALT5   | 0,594179598 | 0,604368163 | 0 | N.A. | 0 |
| PITPNM1   | 0,593962013 | 0,386753921 | 0 | N.A. | 0 |
| PXN       | 0,593873884 | 0,764607087 | 0 | N.A. | 0 |
| ATP10B    | 0,593633322 | 0,653525959 | 0 | N.A. | 0 |
| MICAL2    | 0,593466951 | 0,610152643 | 0 | N.A. | 0 |
| TAX1BP3   | 0,592890974 | 0,404531278 | 0 | N.A. | 0 |
| SULT2B1   | 0,592655786 | 0,777857874 | 0 | N.A. | 0 |
| GPR110    | 0,592422994 | 0,536564391 | 0 | N.A. | 0 |
| MIR22HG   | 0,592103443 | 0,525988408 | 0 | N.A. | 0 |
| MMP24-AS1 | 0,591053287 | 0,322965846 | 0 | N.A. | 0 |
| MYO1C     | 0,590637505 | 0,68300652  | 0 | N.A. | 0 |

|          |             |             |   |      |   |
|----------|-------------|-------------|---|------|---|
| CHPF     | 0,590467962 | 0,758573476 | 0 | N.A. | 0 |
| TXNIP    | 0,59010103  | 0,470527914 | 0 | N.A. | 0 |
| SPATS2L  | 0,589724313 | 0,696607344 | 0 | N.A. | 0 |
| TMEM120B | 0,588389585 | 0,307042481 | 0 | N.A. | 0 |
| ALDH3B1  | 0,588166694 | 0,68623845  | 0 | N.A. | 0 |
| BCAR1    | 0,587832855 | 0,363620563 | 0 | N.A. | 0 |
| MUC17    | 0,587814437 | 0,658981426 | 0 | N.A. | 0 |
| FAM102A  | 0,587393947 | 0,703316994 | 0 | N.A. | 0 |
| SAT1     | 0,586795994 | 0,683531891 | 0 | N.A. | 0 |
| SEMA7A   | 0,58676793  | 0,502524268 | 0 | N.A. | 0 |
| ABHD2    | 0,586668693 | 0,613069194 | 0 | N.A. | 0 |
| MUC12    | 0,586558511 | 0,443192736 | 0 | N.A. | 0 |
| SERINC1  | 0,58609972  | 0,657141805 | 0 | N.A. | 0 |
| CYTH2    | 0,585553833 | 0,563737045 | 0 | N.A. | 0 |
| SEMA4B   | 0,584915992 | 0,762543209 | 1 | cl1  | 0 |
| EHBP1L1  | 0,584754102 | 0,560436145 | 0 | N.A. | 0 |
| PARD6B   | 0,582855132 | 0,676804677 | 0 | N.A. | 0 |
| TNFRSF1A | 0,582452133 | 0,639934025 | 0 | N.A. | 0 |
| PVRL4    | 0,582089718 | 0,747721641 | 0 | N.A. | 0 |
| LYST     | 0,581996601 | 0,430169572 | 0 | N.A. | 0 |
| LRRFIP1  | 0,581843537 | 0,672865929 | 0 | N.A. | 0 |
| SLC40A1  | 0,581811088 | 0,412711442 | 0 | N.A. | 0 |
| ECE1     | 0,581726471 | 0,609483818 | 0 | N.A. | 0 |
| SH3BGRL3 | 0,581596503 | 0,462664717 | 0 | N.A. | 0 |
| MYO6     | 0,581216411 | 0,751428655 | 0 | N.A. | 0 |
| ERBB2IP  | 0,579901253 | 0,49312591  | 0 | N.A. | 0 |
| MAL2     | 0,577997954 | 0,842204837 | 0 | N.A. | 0 |
| TJP2     | 0,577712831 | 0,68216393  | 0 | N.A. | 0 |
| TRIM29   | 0,577463843 | 0,742745227 | 0 | N.A. | 0 |
| DHRS9    | 0,577439569 | 0,62814721  | 0 | N.A. | 0 |
| MPZL3    | 0,577195384 | 0,6355882   | 0 | N.A. | 0 |
| MAPK3    | 0,577125865 | 0,782465888 | 1 | cl1  | 0 |
| ANXA1    | 0,577071676 | 0,335263196 | 0 | N.A. | 0 |

|             |                    |                    |          |            |   |
|-------------|--------------------|--------------------|----------|------------|---|
| LASP1       | 0,576228279        | 0,537978942        | 0        | N.A.       | 0 |
| MBNL2       | 0,576153825        | 0,602400123        | 0        | N.A.       | 0 |
| IL1RN       | 0,575542521        | 0,592375338        | 0        | N.A.       | 0 |
| SCARB2      | 0,575414644        | 0,703246074        | 0        | N.A.       | 0 |
| SAMD9       | 0,575124093        | 0,672767509        | 0        | N.A.       | 0 |
| MYD88       | 0,575119101        | 0,803784323        | 0        | N.A.       | 0 |
| RNF213      | 0,57502248         | 0,631612313        | 0        | N.A.       | 0 |
| IFI27       | 0,574580484        | 0,463290844        | 0        | N.A.       | 0 |
| DNM2        | 0,574381655        | 0,740640242        | 0        | N.A.       | 0 |
| GNAQ        | 0,573623136        | 0,49824925         | 0        | N.A.       | 0 |
| CFLAR       | 0,57294958         | 0,388634209        | 0        | N.A.       | 0 |
| ZNFX1       | 0,572913108        | 0,450492653        | 0        | N.A.       | 0 |
| TMEM106B    | 0,572717527        | 0,630433615        | 0        | N.A.       | 0 |
| HIST1H2BD   | 0,571256865        | 0,457540653        | 0        | N.A.       | 0 |
| KIAA0040    | 0,570876974        | 0,568162299        | 0        | N.A.       | 0 |
| <b>KLK7</b> | <b>0,570581469</b> | <b>0,241721073</b> | <b>1</b> | <b>cl1</b> | 0 |
| RMND5A      | 0,569785467        | 0,678475656        | 0        | N.A.       | 0 |
| SNCG        | 0,569389401        | 0,237679959        | 0        | N.A.       | 0 |
| MYO15B      | 0,56884312         | 0,55671518         | 0        | N.A.       | 0 |
| HECA        | 0,568805436        | 0,516029238        | 0        | N.A.       | 0 |
| XIAP        | 0,568315442        | 0,552996228        | 0        | N.A.       | 0 |
| MVP         | 0,568172016        | 0,703615963        | 0        | N.A.       | 0 |
| <b>PPL</b>  | <b>0,567934631</b> | <b>0,814860934</b> | <b>1</b> | <b>cl1</b> | 0 |
| TIPARP      | 0,567517604        | 0,374703379        | 0        | N.A.       | 0 |
| RILP        | 0,567428783        | 0,227041568        | 0        | N.A.       | 0 |
| EGLN3       | 0,567022207        | 0,68044016         | 0        | N.A.       | 0 |
| NR1D1       | 0,566645158        | 0,562459167        | 0        | N.A.       | 0 |
| SH3RF1      | 0,566616552        | 0,75542952         | 0        | N.A.       | 0 |
| PSAP        | 0,566254139        | 0,655268694        | 0        | N.A.       | 0 |
| TGM2        | 0,566089515        | 0,622198396        | 0        | N.A.       | 0 |
| RAPH1       | 0,565585409        | 0,583705668        | 0        | N.A.       | 0 |
| PLEKHM1     | 0,564873191        | 0,456441905        | 0        | N.A.       | 0 |
| DENND3      | 0,564778794        | 0,578733196        | 0        | N.A.       | 0 |

|             |             |             |   |      |   |
|-------------|-------------|-------------|---|------|---|
| APPL2       | 0,562605216 | 0,590618622 | 0 | N.A. | 0 |
| HSPG2       | 0,561984935 | 0,6391399   | 0 | N.A. | 0 |
| KLK8        | 0,561539407 | 0,363903678 | 1 | cl1  | 0 |
| SLMAP       | 0,561211856 | 0,523053579 | 0 | N.A. | 0 |
| GALNT5      | 0,561047151 | 0,522366258 | 0 | N.A. | 0 |
| GPD2        | 0,561021634 | 0,650463758 | 0 | N.A. | 0 |
| KIAA1551    | 0,560660955 | 0,66909006  | 0 | N.A. | 0 |
| RSAD2       | 0,560404903 | 0,620705785 | 0 | N.A. | 0 |
| WBSCR27     | 0,560322244 | 0,094836056 | 0 | N.A. | 0 |
| PLEKHG6     | 0,559630233 | 0,666133734 | 0 | N.A. | 0 |
| EPAS1       | 0,559391895 | 0,496289546 | 0 | N.A. | 0 |
| SPNS2       | 0,559234717 | 0,548990711 | 0 | N.A. | 0 |
| BNIP3L      | 0,559129634 | 0,405441105 | 0 | N.A. | 0 |
| CPEB2       | 0,5589352   | 0,286981252 | 0 | N.A. | 0 |
| FNDC3B      | 0,558269587 | 0,511283394 | 0 | N.A. | 0 |
| DOCK5       | 0,558062762 | 0,618674855 | 0 | N.A. | 0 |
| GK          | 0,558007479 | 0,493260459 | 0 | N.A. | 0 |
| CDC42BPB    | 0,55798739  | 0,659915523 | 0 | N.A. | 0 |
| R3HDM4      | 0,557951089 | 0,40890371  | 0 | N.A. | 0 |
| WSB2        | 0,557813617 | 0,605809827 | 0 | N.A. | 0 |
| SERTAD2     | 0,557751454 | 0,333246501 | 0 | N.A. | 0 |
| SESTD1      | 0,557519222 | 0,703418541 | 0 | N.A. | 0 |
| DNAJC5      | 0,557433922 | 0,577148951 | 0 | N.A. | 0 |
| GSN         | 0,556865299 | 0,64168702  | 0 | N.A. | 0 |
| RP1-122P22. | 0,556852477 | 0,38978526  | 0 | N.A. | 0 |
| SEZ6L2      | 0,556225723 | 0,720758543 | 1 | cl1  | 0 |
| RELB        | 0,555617488 | 0,402676309 | 0 | N.A. | 0 |
| ATP1B1      | 0,555175526 | 0,610676578 | 0 | N.A. | 0 |
| TMC4        | 0,554667807 | 0,644891711 | 0 | N.A. | 0 |
| INSIG2      | 0,554665744 | 0,658567213 | 0 | N.A. | 0 |
| SFN         | 0,554611122 | 0,551818922 | 0 | N.A. | 0 |
| TMOD3       | 0,553847715 | 0,545246866 | 0 | N.A. | 0 |
| HLA-E       | 0,553248679 | 0,382482895 | 0 | N.A. | 0 |

|             |             |             |   |      |   |
|-------------|-------------|-------------|---|------|---|
| SLC25A23    | 0,552318375 | 0,5517143   | 0 | N.A. | 0 |
| SLC6A14     | 0,552105485 | 0,661982414 | 0 | N.A. | 0 |
| SLC22A18    | 0,551900053 | 0,700015276 | 1 | cls3 | 0 |
| GAN         | 0,551686272 | 0,714690533 | 0 | N.A. | 0 |
| MGLL        | 0,550879472 | 0,596622779 | 0 | N.A. | 0 |
| P4HA1       | 0,549434599 | 0,566128061 | 0 | N.A. | 0 |
| MAPK6       | 0,548929103 | 0,337889584 | 0 | N.A. | 0 |
| S100A6      | 0,548753375 | 0,302732441 | 0 | N.A. | 0 |
| KCNK6       | 0,548648435 | 0,750755502 | 0 | N.A. | 0 |
| HIST1H2AC   | 0,547735816 | 0,501443854 | 0 | N.A. | 0 |
| VEGFA       | 0,547422954 | 0,513833707 | 0 | N.A. | 0 |
| GUCA2B      | 0,547276276 | 0,542000477 | 0 | N.A. | 0 |
| GBP2        | 0,546998145 | 0,333054057 | 0 | N.A. | 0 |
| CTSZ        | 0,546451054 | 0,636845143 | 0 | N.A. | 0 |
| TMEM30A     | 0,54624438  | 0,483354477 | 0 | N.A. | 0 |
| RNPEPL1     | 0,545936292 | 0,666727445 | 0 | N.A. | 0 |
| LPIN2       | 0,544712767 | 0,558141076 | 0 | N.A. | 0 |
| MMP14       | 0,54468665  | 0,526671451 | 0 | N.A. | 0 |
| HKDC1       | 0,544041981 | 0,482444169 | 0 | N.A. | 0 |
| PAM         | 0,54368229  | 0,64644885  | 0 | N.A. | 0 |
| RALGPS2     | 0,543203707 | 0,444302629 | 0 | N.A. | 0 |
| ITPR3       | 0,542836879 | 0,773585738 | 0 | N.A. | 0 |
| NABP1       | 0,542657977 | 0,475278312 | 0 | N.A. | 0 |
| DUOX2       | 0,542502694 | 0,545618168 | 0 | N.A. | 0 |
| ARHGAP5     | 0,542393267 | 0,629596505 | 0 | N.A. | 0 |
| EPS8L2      | 0,542009996 | 0,778487279 | 0 | N.A. | 0 |
| TOM1L2      | 0,541920631 | 0,382769275 | 0 | N.A. | 0 |
| SHC1        | 0,541910935 | 0,055804737 | 0 | N.A. | 0 |
| IFRD1       | 0,541715616 | 0,523496982 | 0 | N.A. | 0 |
| RP11-268J15 | 0,541538864 | 0,468267447 | 0 | N.A. | 0 |
| ASAP2       | 0,541275918 | 0,704493551 | 0 | N.A. | 0 |
| ZNF185      | 0,5409498   | 0,581452092 | 1 | cl1  | 0 |
| SRGAP1      | 0,540928361 | 0,6794122   | 0 | N.A. | 0 |

|          |             |             |   |      |   |
|----------|-------------|-------------|---|------|---|
| REEP3    | 0,540829817 | 0,655452274 | 0 | N.A. | 0 |
| SERPINE2 | 0,540510159 | 0,716573112 | 0 | N.A. | 0 |
| DAPP1    | 0,540380987 | 0,074767981 | 0 | N.A. | 0 |
| SH2D3A   | 0,540039139 | 0,692192395 | 0 | N.A. | 0 |
| CYP2S1   | 0,539831549 | 0,623360773 | 0 | N.A. | 0 |
| LHFPL2   | 0,539747188 | 0,339104773 | 0 | N.A. | 0 |
| MACF1    | 0,539078086 | 0,594828052 | 0 | N.A. | 0 |
| SLC6A20  | 0,538394743 | 0,560373495 | 0 | N.A. | 0 |
| TPM4     | 0,538152645 | 0,317697875 | 0 | N.A. | 0 |
| FAM126B  | 0,538118076 | 0,555756299 | 0 | N.A. | 0 |
| ABHD17C  | 0,538073261 | 0,528295334 | 0 | N.A. | 0 |
| TMEM45B  | 0,536952795 | 0,709420926 | 0 | N.A. | 0 |
| LRRC1    | 0,53672514  | 0,436946117 | 0 | N.A. | 0 |
| NPC1     | 0,536631101 | 0,494916911 | 0 | N.A. | 0 |
| LMBRD1   | 0,535761014 | 0,581556939 | 0 | N.A. | 0 |
| WIPF2    | 0,535311376 | 0,593227771 | 0 | N.A. | 0 |
| KIF13B   | 0,535161488 | 0,744073304 | 0 | N.A. | 0 |
| B2M      | 0,535074679 | 0,451429774 | 0 | N.A. | 0 |
| MLLT4    | 0,535053942 | 0,671285585 | 0 | N.A. | 0 |
| ABCG1    | 0,534957761 | 0,51487934  | 0 | N.A. | 0 |
| B3GNT3   | 0,534925856 | 0,681925429 | 0 | N.A. | 0 |
| SH3GLB1  | 0,534815595 | 0,546805748 | 0 | N.A. | 0 |
| SMIM6    | 0,53448632  | 0,621405975 | 0 | N.A. | 0 |
| SDR16C5  | 0,534478673 | 0,655605109 | 0 | N.A. | 0 |
| POF1B    | 0,534011438 | 0,346195179 | 0 | N.A. | 0 |
| CCDC68   | 0,533060378 | 0,266232431 | 0 | N.A. | 0 |
| MTUS1    | 0,532486233 | 0,591622802 | 0 | N.A. | 0 |
| DUOXA2   | 0,532207356 | 0,428701277 | 0 | N.A. | 0 |
| C11orf86 | 0,531999883 | 0,43357284  | 0 | N.A. | 0 |
| ANTXR2   | 0,531903293 | 0,643125823 | 0 | N.A. | 0 |
| CALCOCO1 | 0,531476072 | 0,562371629 | 0 | N.A. | 0 |
| MALAT1   | 0,530990814 | 0,586449823 | 0 | N.A. | 0 |
| SOWAHC   | 0,530563435 | 0,584591039 | 0 | N.A. | 0 |

|             |             |             |   |      |   |
|-------------|-------------|-------------|---|------|---|
| ITGAV       | 0,530545578 | 0,600351449 | 0 | N.A. | 0 |
| CLSTN1      | 0,529495871 | 0,828427121 | 0 | N.A. | 0 |
| CLDN23      | 0,528974191 | 0,615857172 | 0 | N.A. | 0 |
| TFF1        | 0,528915348 | 0,647226068 | 0 | N.A. | 0 |
| CDH17       | 0,528702873 | 0,594555312 | 0 | N.A. | 0 |
| YAP1        | 0,528695527 | 0,525456221 | 0 | N.A. | 0 |
| TTC9        | 0,528580309 | 0,515002113 | 0 | N.A. | 0 |
| EGFR        | 0,528391369 | 0,528634549 | 0 | N.A. | 0 |
| SLC17A5     | 0,528218334 | 0,718197926 | 0 | N.A. | 0 |
| IST1        | 0,528217992 | 0,258895343 | 0 | N.A. | 0 |
| KIFC3       | 0,528172126 | 0,399174434 | 0 | N.A. | 0 |
| LINC00969   | 0,528154177 | 0,626349113 | 0 | N.A. | 0 |
| HERC4       | 0,527954779 | 0,443560945 | 0 | N.A. | 0 |
| SMPDL3A     | 0,52683903  | 0,496345636 | 0 | N.A. | 0 |
| CSTB        | 0,526817795 | 0,491606585 | 0 | N.A. | 0 |
| NCOR2       | 0,526647052 | 0,64606396  | 0 | N.A. | 0 |
| SMIM5       | 0,526501529 | 0,527835232 | 0 | N.A. | 0 |
| RP11-841O20 | 0,526173401 | 0,363847529 | 0 | N.A. | 0 |
| PRKCDBP     | 0,526090265 | 0,370255103 | 0 | N.A. | 0 |
| MKNK2       | 0,526029577 | 0,659740039 | 0 | N.A. | 0 |
| SIRT7       | 0,525291676 | 0,76030063  | 0 | N.A. | 0 |
| TRIM15      | 0,524972485 | 0,371521586 | 0 | N.A. | 0 |
| DUSP3       | 0,524826289 | 0,452677634 | 0 | N.A. | 0 |
| MYH9        | 0,524330356 | 0,566449036 | 0 | N.A. | 0 |
| MIER3       | 0,52353296  | 0,382813139 | 0 | N.A. | 0 |
| SFTA2       | 0,523169611 | 0,478116197 | 1 | cl1  | 0 |
| EHD1        | 0,522889161 | 0,406505587 | 0 | N.A. | 0 |
| RAB22A      | 0,522297506 | 0,566566393 | 0 | N.A. | 0 |
| FOXO1       | 0,522269604 | 0,570100038 | 0 | N.A. | 0 |
| PI3         | 0,521548376 | 0,415737391 | 0 | N.A. | 0 |
| SMPD1       | 0,521193519 | 0,564223115 | 0 | N.A. | 0 |
| IFT172      | 0,520914183 | 0,421047194 | 0 | N.A. | 0 |
| MACC1       | 0,520251012 | 0,686492677 | 0 | N.A. | 0 |



|          |             |             |   |      |   |
|----------|-------------|-------------|---|------|---|
| RCOR1    | 0,519853817 | 0,338821561 | 0 | N.A. | 0 |
| PPP1R14D | 0,519811413 | 0,436245164 | 0 | N.A. | 0 |
| SIPA1    | 0,519487776 | 0,564787471 | 0 | N.A. | 0 |
| PKIB     | 0,519455738 | 0,540952158 | 0 | N.A. | 0 |
| TIMP1    | 0,519374602 | 0,703915055 | 0 | N.A. | 0 |
| RNF19B   | 0,519292525 | 0,211982924 | 0 | N.A. | 0 |
| MYEOV    | 0,518373769 | 0,625687656 | 0 | N.A. | 0 |
| ASS1     | 0,517886018 | 0,482273149 | 0 | N.A. | 0 |
| APOL2    | 0,517773218 | 0,373296174 | 0 | N.A. | 0 |
| TFF2     | 0,517234346 | 0,595052218 | 0 | N.A. | 0 |
| STS      | 0,517032454 | 0,578770956 | 0 | N.A. | 0 |
| MAPRE3   | 0,516589344 | 0,630568273 | 0 | N.A. | 0 |
| CTSE     | 0,516564227 | 0,496678341 | 1 | cl1  | 0 |
| ISG15    | 0,515975933 | 0,458027125 | 0 | N.A. | 0 |
| KLF2     | 0,515940459 | 0,409187704 | 0 | N.A. | 0 |
| TNK2     | 0,515217861 | 0,48688726  | 0 | N.A. | 0 |
| SMURF1   | 0,51519353  | 0,474034639 | 0 | N.A. | 0 |
| PITPNC1  | 0,514829979 | 0,297500367 | 0 | N.A. | 0 |
| AHCYL2   | 0,514669335 | 0,549376413 | 0 | N.A. | 0 |
| B3GALT5  | 0,514584301 | 0,604185593 | 0 | N.A. | 0 |
| ARSA     | 0,514455347 | 0,500376996 | 0 | N.A. | 0 |
| SMIM22   | 0,513849173 | 0,488105573 | 0 | N.A. | 0 |
| CAPN5    | 0,513794724 | 0,512446457 | 0 | N.A. | 0 |
| TRIM25   | 0,513769892 | 0,391094682 | 0 | N.A. | 0 |
| HOOK3    | 0,513631841 | 0,523383397 | 0 | N.A. | 0 |
| FXD5     | 0,513557066 | 0,431044247 | 0 | N.A. | 0 |
| MIR210HG | 0,513395989 | 0,634678703 | 0 | N.A. | 0 |
| GALNT1   | 0,513085724 | 0,508535987 | 0 | N.A. | 0 |
| KRT16    | 0,512989641 | 0,02493821  | 0 | N.A. | 0 |
| SLC12A7  | 0,51282609  | 0,621665133 | 0 | N.A. | 0 |
| TAPBP    | 0,512457641 | 0,386607208 | 0 | N.A. | 0 |
| NFE2L1   | 0,511454683 | 0,491326848 | 0 | N.A. | 0 |
| TCF7L2   | 0,511216342 | 0,531247499 | 0 | N.A. | 0 |

|             |             |             |   |      |   |
|-------------|-------------|-------------|---|------|---|
| PIP4K2C     | 0,511105239 | 0,44371777  | 0 | N.A. | 0 |
| FAM46A      | 0,510788506 | 0,605255265 | 0 | N.A. | 0 |
| GPRC5C      | 0,510720307 | 0,803421506 | 0 | N.A. | 0 |
| ARHGEF12    | 0,50986982  | 0,703988226 | 0 | N.A. | 0 |
| DENND2C     | 0,509669289 | 0,289417822 | 0 | N.A. | 0 |
| PDP1        | 0,509247255 | 0,573277066 | 0 | N.A. | 0 |
| CEACAM7     | 0,509163808 | 0,323494483 | 0 | N.A. | 0 |
| PLSCR1      | 0,508869533 | 0,557199247 | 0 | N.A. | 0 |
| IDS         | 0,508761232 | 0,394868034 | 0 | N.A. | 0 |
| GULP1       | 0,508541279 | 0,517764254 | 0 | N.A. | 0 |
| CDC42EP5    | 0,508343825 | 0,276474726 | 0 | N.A. | 0 |
| COX6B2      | 0,508080532 | 0,690486532 | 0 | N.A. | 0 |
| TNFAIP1     | 0,50751869  | 0,6622989   | 0 | N.A. | 0 |
| DDA1        | 0,507475299 | 0,320257968 | 0 | N.A. | 0 |
| CIDEC       | 0,507052585 | 0,469309823 | 0 | N.A. | 0 |
| CASP10      | 0,507020025 | 0,363293409 | 0 | N.A. | 0 |
| IFNGR1      | 0,506954584 | 0,685579317 | 0 | N.A. | 0 |
| TUBB2A      | 0,506835184 | 0,453434804 | 0 | N.A. | 0 |
| IBTK        | 0,506722728 | 0,528185611 | 0 | N.A. | 0 |
| RNF186      | 0,506144274 | 0,290716441 | 0 | N.A. | 0 |
| NFKBIE      | 0,505455712 | 0,406390707 | 0 | N.A. | 0 |
| F3          | 0,504995258 | 0,75042491  | 0 | N.A. | 0 |
| BCL2L15     | 0,504745415 | 0,490890035 | 0 | N.A. | 0 |
| GTPBP1      | 0,504566379 | 0,30189923  | 0 | N.A. | 0 |
| DDX60       | 0,504454414 | 0,464337641 | 0 | N.A. | 0 |
| KRT15       | 0,504451152 | 0,432809164 | 0 | N.A. | 0 |
| TAOK3       | 0,503910208 | 0,512235929 | 0 | N.A. | 0 |
| RP11-783K16 | 0,503902264 | 0,358242805 | 0 | N.A. | 0 |
| INSIG1      | 0,503763056 | 0,483035782 | 0 | N.A. | 0 |
| RNF223      | 0,503669035 | 0,413703141 | 0 | N.A. | 0 |
| EPS8L3      | 0,50324593  | 0,640201743 | 0 | N.A. | 0 |
| KRT20       | 0,503234456 | 0,605278091 | 0 | N.A. | 0 |
| GNB1        | 0,503017401 | 0,581275723 | 0 | N.A. | 0 |

|           |             |              |   |      |   |
|-----------|-------------|--------------|---|------|---|
| CYTH1     | 0,502979981 | 0,478443489  | 0 | N.A. | 0 |
| SEC31A    | 0,502797254 | 0,362903321  | 0 | N.A. | 0 |
| OAS3      | 0,502754134 | 0,590918822  | 0 | N.A. | 0 |
| PLAC8     | 0,502732037 | 0,60509469   | 0 | N.A. | 0 |
| GRN       | 0,502479665 | 0,543916298  | 0 | N.A. | 0 |
| CLDN12    | 0,502391613 | 0,64056347   | 0 | N.A. | 0 |
| TYMP      | 0,502087366 | 0,330593672  | 0 | N.A. | 0 |
| TCIRG1    | 0,501912479 | 0,525406864  | 0 | N.A. | 0 |
| BIRC3     | 0,501897109 | 0,426106018  | 0 | N.A. | 0 |
| FAM83H    | 0,501869103 | 0,56522893   | 0 | N.A. | 0 |
| CYP4F12   | 0,501107703 | 0,477744876  | 0 | N.A. | 0 |
| ZBTB20    | 0,501050446 | 0,433688435  | 0 | N.A. | 0 |
| FTH1      | 0,500937494 | 0,077613818  | 0 | N.A. | 0 |
| PKN2      | 0,500703011 | 0,638771842  | 0 | N.A. | 0 |
| FOXN2     | 0,50043951  | 0,215098665  | 0 | N.A. | 0 |
| ATP2B4    | 0,500407648 | 0,545573112  | 0 | N.A. | 0 |
| RND3      | 0,499882837 | 0,753962493  | 0 | N.A. | 0 |
| ARF6      | 0,49968826  | 0,418154117  | 0 | N.A. | 0 |
| RDH13     | 0,499410619 | 0,445431841  | 0 | N.A. | 0 |
| TMEM139   | 0,499328615 | 0,580984647  | 0 | N.A. | 0 |
| INF2      | 0,498978227 | 0,673122893  | 0 | N.A. | 0 |
| C17orf67  | 0,498773884 | -0,031982299 | 0 | N.A. | 0 |
| S100A2    | 0,498329069 | 0,354499252  | 1 | cl1  | 0 |
| FUT2      | 0,498138582 | 0,505599763  | 0 | N.A. | 0 |
| C1GALT1   | 0,498104563 | 0,634182714  | 0 | N.A. | 0 |
| MMP15     | 0,497924602 | 0,531121305  | 0 | N.A. | 0 |
| SHOC2     | 0,497766845 | 0,400197336  | 0 | N.A. | 0 |
| CD164     | 0,497652451 | 0,599461963  | 0 | N.A. | 0 |
| CHAC1     | 0,497554911 | 0,442829993  | 0 | N.A. | 0 |
| TRIP10    | 0,496853055 | 0,705519786  | 0 | N.A. | 0 |
| SECISBP2L | 0,496842846 | 0,601751263  | 0 | N.A. | 0 |
| BCL10     | 0,496635075 | 0,167956059  | 0 | N.A. | 0 |
| IL2RG     | 0,496488734 | 0,445616077  | 0 | N.A. | 0 |

|             |             |             |   |      |   |
|-------------|-------------|-------------|---|------|---|
| CXADR       | 0,496005348 | 0,689969582 | 0 | N.A. | 0 |
| RNF39       | 0,495971473 | 0,626902979 | 1 | cl1  | 0 |
| FGD6        | 0,495425108 | 0,563003656 | 0 | N.A. | 0 |
| INPP4B      | 0,495138133 | 0,493697665 | 0 | N.A. | 0 |
| IL22RA1     | 0,494882008 | 0,581940102 | 0 | N.A. | 0 |
| MAP1LC3B    | 0,494777132 | 0,334574534 | 0 | N.A. | 0 |
| TLE1        | 0,494431019 | 0,224551059 | 0 | N.A. | 0 |
| FXVD3       | 0,494344471 | 0,53041723  | 0 | N.A. | 0 |
| VASP        | 0,493850509 | 0,494231401 | 0 | N.A. | 0 |
| TAX1BP1     | 0,493345765 | 0,583949406 | 0 | N.A. | 0 |
| KRT17       | 0,493230731 | 0,568491862 | 1 | cl1  | 0 |
| FAM114A1    | 0,493174418 | 0,578632793 | 0 | N.A. | 0 |
| ARHGAP29    | 0,492981959 | 0,247018094 | 0 | N.A. | 0 |
| BHLHE41     | 0,492605731 | 0,504942053 | 0 | N.A. | 0 |
| SAV1        | 0,492593184 | 0,411934812 | 0 | N.A. | 0 |
| PELI1       | 0,492436493 | 0,499782198 | 0 | N.A. | 0 |
| TMEM87B     | 0,492243275 | 0,58137221  | 0 | N.A. | 0 |
| CLIP1       | 0,492073815 | 0,64004966  | 0 | N.A. | 0 |
| CTSB        | 0,491845214 | 0,588491146 | 0 | N.A. | 0 |
| CTD-2396E7. | 0,491165881 | 0,258571869 | 0 | N.A. | 0 |
| ARHGAP12    | 0,490913923 | 0,554811684 | 0 | N.A. | 0 |
| KLF6        | 0,490833894 | 0,635419228 | 0 | N.A. | 0 |
| RRBP1       | 0,490794371 | 0,55720004  | 0 | N.A. | 0 |
| IL32        | 0,490111497 | 0,285774635 | 0 | N.A. | 0 |
| CCDC186     | 0,489565885 | 0,506079752 | 0 | N.A. | 0 |
| MYRF        | 0,489547358 | 0,676797996 | 0 | N.A. | 0 |
| IL18        | 0,489410974 | 0,476411983 | 0 | N.A. | 0 |
| ARL8B       | 0,488958805 | 0,195513781 | 0 | N.A. | 0 |
| DPP4        | 0,488526356 | 0,49510719  | 0 | N.A. | 0 |
| ZBTB7B      | 0,487845785 | 0,678609826 | 0 | N.A. | 0 |
| ANKLE2      | 0,48761373  | 0,48842645  | 0 | N.A. | 0 |
| MFI2        | 0,486947583 | 0,621157768 | 0 | N.A. | 0 |
| HSD17B2     | 0,485311709 | 0,456045358 | 0 | N.A. | 0 |

|          |             |             |   |      |   |
|----------|-------------|-------------|---|------|---|
| CLOCK    | 0,485279182 | 0,60842416  | 0 | N.A. | 0 |
| MIR222HG | 0,484512181 | 0,407220891 | 0 | N.A. | 0 |
| DLGAP4   | 0,484491432 | 0,453873322 | 0 | N.A. | 0 |
| STOM     | 0,484370266 | 0,515790206 | 0 | N.A. | 0 |
| RAP2B    | 0,483993881 | 0,614367063 | 0 | N.A. | 0 |
| LPCAT4   | 0,483893751 | 0,657270824 | 0 | N.A. | 0 |
| VNN1     | 0,483839788 | 0,488186468 | 0 | N.A. | 0 |
| KIAA1217 | 0,483453653 | 0,406763782 | 0 | N.A. | 0 |
| ODF3B    | 0,483198729 | 0,247168187 | 0 | N.A. | 0 |
| SERPINB8 | 0,483041882 | 0,239628339 | 0 | N.A. | 0 |
| BACH1    | 0,482209954 | 0,642075416 | 0 | N.A. | 0 |
| SUSD6    | 0,481904296 | 0,516330409 | 0 | N.A. | 0 |
| TMEM30B  | 0,481899328 | 0,434025954 | 0 | N.A. | 0 |
| CPEB4    | 0,481783488 | 0,445159908 | 0 | N.A. | 0 |
| C12orf49 | 0,481749781 | 0,498171063 | 0 | N.A. | 0 |
| TJP1     | 0,480633155 | 0,752506656 | 0 | N.A. | 0 |
| UBR4     | 0,479992588 | 0,417966713 | 0 | N.A. | 0 |
| STAT6    | 0,479938774 | 0,504697786 | 0 | N.A. | 0 |
| C4orf19  | 0,479527956 | 0,492244692 | 0 | N.A. | 0 |
| LCOR     | 0,479501431 | 0,365886174 | 0 | N.A. | 0 |
| RAET1L   | 0,478871197 | 0,514673208 | 0 | N.A. | 0 |
| MXI1     | 0,477977399 | 0,454051746 | 0 | N.A. | 0 |
| SBNO2    | 0,477829099 | 0,381962078 | 0 | N.A. | 0 |
| TMEM125  | 0,477754886 | 0,570870576 | 0 | N.A. | 0 |
| CLDN4    | 0,477564594 | 0,639530539 | 0 | N.A. | 0 |
| PDE4C    | 0,476715253 | 0,242960777 | 0 | N.A. | 0 |
| CCDC107  | 0,475967824 | 0,464527337 | 0 | N.A. | 0 |
| S100A10  | 0,474964212 | 0,307863162 | 0 | N.A. | 0 |
| PTP4A2   | 0,474851143 | 0,186485016 | 0 | N.A. | 0 |
| ZBTB43   | 0,474683471 | 0,372891029 | 0 | N.A. | 0 |
| METRNL   | 0,473971214 | 0,151582339 | 0 | N.A. | 0 |
| KLHL21   | 0,473557028 | 0,194069611 | 0 | N.A. | 0 |
| SCEL     | 0,473439109 | 0,631357019 | 1 | cl1  | 0 |

|            |             |             |   |      |   |
|------------|-------------|-------------|---|------|---|
| ARRDC1     | 0,472895616 | 0,789515828 | 0 | N.A. | 0 |
| TLDC1      | 0,472816182 | 0,523582457 | 0 | N.A. | 0 |
| ULBP2      | 0,472796254 | 0,389497959 | 0 | N.A. | 0 |
| FAM214B    | 0,472785113 | 0,504020053 | 0 | N.A. | 0 |
| DCBLD2     | 0,47273649  | 0,55493073  | 0 | N.A. | 0 |
| CDYL       | 0,472388062 | 0,539407839 | 0 | N.A. | 0 |
| FAM132A    | 0,472287498 | 0,683585704 | 0 | N.A. | 0 |
| PNCK       | 0,472104278 | 0,198869443 | 0 | N.A. | 0 |
| S100A14    | 0,471955955 | 0,612393593 | 0 | N.A. | 0 |
| PSEN1      | 0,471218873 | 0,627015423 | 0 | N.A. | 0 |
| HS3ST1     | 0,471154685 | 0,321831109 | 0 | N.A. | 0 |
| ANKRD13A   | 0,470803766 | 0,556057583 | 0 | N.A. | 0 |
| LINC00520  | 0,470792903 | 0,674467222 | 0 | N.A. | 0 |
| DGKA       | 0,470743017 | 0,716852008 | 0 | N.A. | 0 |
| EIF4E3     | 0,47074246  | 0,541641735 | 0 | N.A. | 0 |
| RP3-395M20 | 0,470631316 | 0,510102477 | 0 | N.A. | 0 |
| ANKRD9     | 0,470452932 | 0,502401356 | 0 | N.A. | 0 |
| AKAP13     | 0,470292444 | 0,650705462 | 0 | N.A. | 0 |
| ADAM10     | 0,469911781 | 0,550447225 | 0 | N.A. | 0 |
| HRASLS2    | 0,469826743 | 0,264270886 | 0 | N.A. | 0 |
| ATP9A      | 0,469440066 | 0,512556553 | 0 | N.A. | 0 |
| SPRR1B     | 0,469394784 | 0,452490938 | 0 | N.A. | 0 |
| LENG8      | 0,469257945 | 0,595243617 | 0 | N.A. | 0 |
| CFDP1      | 0,469234564 | 0,623739626 | 0 | N.A. | 0 |
| UBL3       | 0,469220015 | 0,53159715  | 0 | N.A. | 0 |
| PDGFA      | 0,468798498 | 0,592745418 | 0 | N.A. | 0 |
| SGPP2      | 0,46857423  | 0,74798094  | 0 | N.A. | 0 |
| GUK1       | 0,467852191 | 0,161152908 | 0 | N.A. | 0 |
| RRAGC      | 0,46737164  | 0,480236821 | 0 | N.A. | 0 |
| GAST       | 0,467020996 | 0,431646749 | 0 | N.A. | 0 |
| S100A11    | 0,466839356 | 0,220558293 | 0 | N.A. | 0 |
| GRIN2D     | 0,466616846 | 0,312873928 | 0 | N.A. | 0 |
| PTPRF      | 0,465854709 | 0,627760061 | 0 | N.A. | 0 |

|          |             |             |   |      |   |
|----------|-------------|-------------|---|------|---|
| DGKH     | 0,465393259 | 0,550326659 | 0 | N.A. | 0 |
| N4BP1    | 0,464980447 | 0,474497295 | 0 | N.A. | 0 |
| RARA-AS1 | 0,464766848 | 0,291329067 | 0 | N.A. | 0 |
| FEZ2     | 0,464531311 | 0,643050897 | 0 | N.A. | 0 |
| STX7     | 0,464518318 | 0,564066605 | 0 | N.A. | 0 |
| ANO6     | 0,464487521 | 0,404844646 | 0 | N.A. | 0 |
| KCMF1    | 0,46332772  | 0,633477645 | 0 | N.A. | 0 |
| CNKS1    | 0,463219669 | 0,638560889 | 0 | N.A. | 0 |
| FOXO3    | 0,463016663 | 0,433364255 | 0 | N.A. | 0 |
| LIMA1    | 0,462663913 | 0,646747399 | 0 | N.A. | 0 |
| MST1R    | 0,462494946 | 0,630407694 | 0 | N.A. | 0 |
| NCOA2    | 0,462016173 | 0,209995326 | 0 | N.A. | 0 |
| SHROOM3  | 0,461511016 | 0,652818032 | 0 | N.A. | 0 |
| RASGRP3  | 0,461492818 | 0,295816479 | 0 | N.A. | 0 |
| SP1      | 0,461155152 | 0,417111574 | 0 | N.A. | 0 |
| SEPP1    | 0,460752134 | 0,350040333 | 0 | N.A. | 0 |
| ITPKC    | 0,460718351 | 0,512989138 | 0 | N.A. | 0 |
| BATF2    | 0,460535678 | 0,334919432 | 0 | N.A. | 0 |
| PLEKHN1  | 0,460380278 | 0,578503372 | 0 | N.A. | 0 |
| CTNNA1   | 0,459813135 | 0,674472488 | 0 | N.A. | 0 |
| TRIOBP   | 0,459801939 | 0,585143894 | 0 | N.A. | 0 |
| RALGDS   | 0,459658764 | 0,18371625  | 0 | N.A. | 0 |
| PLOD2    | 0,459475955 | 0,178693779 | 0 | N.A. | 0 |
| GRHL1    | 0,459274567 | 0,355102565 | 0 | N.A. | 0 |
| CTSS     | 0,459143191 | 0,188715288 | 0 | N.A. | 0 |
| TXNRD1   | 0,459112402 | 0,275519742 | 0 | N.A. | 0 |
| MED15    | 0,458898599 | 0,534594051 | 0 | N.A. | 0 |
| ARL8A    | 0,458533821 | 0,690820279 | 0 | N.A. | 0 |
| HES4     | 0,458366633 | 0,209981619 | 0 | N.A. | 0 |
| SERPIN5  | 0,458262391 | 0,618913781 | 1 | cl1  | 0 |
| LIF      | 0,458114161 | 0,608190619 | 0 | N.A. | 0 |
| PERP     | 0,457301149 | 0,786328142 | 0 | N.A. | 0 |
| NFAT5    | 0,457282755 | 0,476446163 | 0 | N.A. | 0 |

|               |                    |                    |          |            |   |
|---------------|--------------------|--------------------|----------|------------|---|
| FOXC1         | 0,457234003        | 0,43847209         | 0        | N.A.       | 0 |
| HELZ2         | 0,457209329        | 0,621553747        | 0        | N.A.       | 0 |
| <b>MMP7</b>   | <b>0,456657307</b> | <b>0,3140915</b>   | <b>1</b> | <b>cl1</b> | 0 |
| LGR4          | 0,456604827        | 0,437240219        | 0        | N.A.       | 0 |
| ABTB1         | 0,456534889        | 0,325750164        | 0        | N.A.       | 0 |
| RREB1         | 0,456485393        | 0,451815079        | 0        | N.A.       | 0 |
| TMEM8A        | 0,456427524        | 0,503129743        | 0        | N.A.       | 0 |
| SLC45A4       | 0,456152781        | 0,285824307        | 0        | N.A.       | 0 |
| PPP1R13L      | 0,456099364        | 0,708628779        | 0        | N.A.       | 0 |
| FAM107B       | 0,45574357         | 0,215027966        | 0        | N.A.       | 0 |
| SCIN          | 0,455637752        | 0,463310682        | 0        | N.A.       | 0 |
| S100A16       | 0,45529253         | 0,501712623        | 0        | N.A.       | 0 |
| <b>RHBDL2</b> | <b>0,455127996</b> | <b>0,664827991</b> | <b>1</b> | <b>cl1</b> | 0 |
| LRRC32        | 0,454871184        | 0,276599323        | 0        | N.A.       | 0 |
| SLC35A3       | 0,453839442        | 0,597100179        | 0        | N.A.       | 0 |
| WDR13         | 0,453506413        | 0,11829063         | 0        | N.A.       | 0 |
| AMOTL2        | 0,453019855        | 0,714415936        | 0        | N.A.       | 0 |
| CLMN          | 0,45290628         | 0,540275977        | 0        | N.A.       | 0 |
| FLII          | 0,452900636        | 0,600428113        | 0        | N.A.       | 0 |
| C9orf89       | 0,452722868        | 0,293288956        | 0        | N.A.       | 0 |
| CEMIP         | 0,452681904        | 0,364002593        | 0        | N.A.       | 0 |
| KCTD11        | 0,452644617        | 0,585760905        | 0        | N.A.       | 0 |
| MX2           | 0,452435636        | 0,461022367        | 0        | N.A.       | 0 |
| ATXN1         | 0,452381668        | 0,391383607        | 0        | N.A.       | 0 |
| HSBP1L1       | 0,45209043         | 0,29827209         | 0        | N.A.       | 0 |
| HLA-F         | 0,451617876        | 0,295410395        | 0        | N.A.       | 0 |
| PPIC          | 0,451539513        | 0,424293559        | 0        | N.A.       | 0 |
| PLEKHA1       | 0,451493956        | 0,686322379        | 0        | N.A.       | 0 |
| TGOLN2        | 0,451477403        | 0,39653043         | 0        | N.A.       | 0 |
| VIMP          | 0,451281461        | 0,618365387        | 0        | N.A.       | 0 |
| SEC23A        | 0,451216674        | 0,286789128        | 0        | N.A.       | 0 |
| HDAC9         | 0,450915134        | 0,479493715        | 0        | N.A.       | 0 |
| KHNYN         | 0,450875171        | 0,232458655        | 0        | N.A.       | 0 |



|                |                    |                    |          |            |   |
|----------------|--------------------|--------------------|----------|------------|---|
| SECTM1         | 0,450097054        | 0,40342675         | 0        | N.A.       | 0 |
| SORL1          | 0,450093623        | 0,565472706        | 0        | N.A.       | 0 |
| TPT1-AS1       | 0,450020602        | 0,219939864        | 0        | N.A.       | 0 |
| PPP1CB         | 0,449893309        | 0,346388162        | 0        | N.A.       | 0 |
| SLC52A3        | 0,449841875        | 0,460601921        | 0        | N.A.       | 0 |
| JUND           | 0,449724698        | 0,538415321        | 0        | N.A.       | 0 |
| FOSL1          | 0,449381029        | 0,287363292        | 0        | N.A.       | 0 |
| CHMP2B         | 0,449235148        | 0,64293261         | 0        | N.A.       | 0 |
| MYL6           | 0,449024375        | 0,217359502        | 0        | N.A.       | 0 |
| RAB27B         | 0,448492719        | 0,506941759        | 0        | N.A.       | 0 |
| ANXA2          | 0,448203252        | 0,452065675        | 0        | N.A.       | 0 |
| WBP2           | 0,448144051        | 0,492323548        | 0        | N.A.       | 0 |
| TOB1           | 0,447813213        | 0,543973435        | 0        | N.A.       | 0 |
| PDGFB          | 0,447790755        | 0,491177421        | 0        | N.A.       | 0 |
| BDKRB2         | 0,447704165        | 0,576405375        | 0        | N.A.       | 0 |
| DSG3           | 0,447658098        | 0,527299579        | 0        | N.A.       | 0 |
| PFKFB3         | 0,4470099          | 0,217617853        | 0        | N.A.       | 0 |
| NPTN           | 0,446891064        | 0,455074206        | 0        | N.A.       | 0 |
| LRP1           | 0,446804427        | 0,450968215        | 0        | N.A.       | 0 |
| TAF13          | 0,446683697        | 0,344284895        | 0        | N.A.       | 0 |
| DIAPH1         | 0,44643072         | 0,724360915        | 0        | N.A.       | 0 |
| HDHD3          | 0,446292459        | 0,596937122        | 0        | N.A.       | 0 |
| <b>TACSTD2</b> | <b>0,446283628</b> | <b>0,843848373</b> | <b>1</b> | <b>cl1</b> | 0 |
| STK39          | 0,44620458         | 0,51263925         | 0        | N.A.       | 0 |
| VAMP5          | 0,445564147        | 0,511714335        | 0        | N.A.       | 0 |
| SLC2A13        | 0,445195223        | 0,239693979        | 0        | N.A.       | 0 |
| CRIM1          | 0,445089934        | 0,452904092        | 0        | N.A.       | 0 |
| ETS1           | 0,44507917         | 0,27184605         | 0        | N.A.       | 0 |
| PMP22          | 0,444701967        | 0,459453152        | 0        | N.A.       | 0 |
| C4orf3         | 0,444629114        | 0,066638017        | 0        | N.A.       | 0 |
| CCL28          | 0,444506458        | 0,275713732        | 0        | N.A.       | 0 |
| GPR37L1        | 0,444485682        | 0,519693562        | 0        | N.A.       | 0 |
| EDEM1          | 0,444470679        | 0,080771529        | 0        | N.A.       | 0 |

|           |             |             |   |      |   |
|-----------|-------------|-------------|---|------|---|
| NDEL1     | 0,444415147 | 0,358816447 | 0 | N.A. | 0 |
| INADL     | 0,443564561 | 0,519339903 | 0 | N.A. | 0 |
| SMIM2-AS1 | 0,44345504  | 0,086623397 | 0 | N.A. | 0 |
| TMEM120A  | 0,443055874 | 0,525124671 | 0 | N.A. | 0 |
| STX4      | 0,442756969 | 0,230223669 | 0 | N.A. | 0 |
| PTPRK     | 0,442670377 | 0,489854403 | 0 | N.A. | 0 |
| LYPD3     | 0,44240349  | 0,356267241 | 0 | N.A. | 0 |
| ZG16B     | 0,442305057 | 0,508628147 | 0 | N.A. | 0 |
| MUC4      | 0,442144175 | 0,606934463 | 0 | N.A. | 0 |
| GOLGA2    | 0,441969544 | 0,575689637 | 0 | N.A. | 0 |
| GNS       | 0,441374702 | 0,226293749 | 0 | N.A. | 0 |
| LRRC8A    | 0,441014295 | 0,69728479  | 0 | N.A. | 0 |
| NFKB2     | 0,441007961 | 0,090930723 | 0 | N.A. | 0 |
| HIVEP2    | 0,440929582 | 0,269746085 | 0 | N.A. | 0 |
| ZYX       | 0,440803807 | 0,157282477 | 0 | N.A. | 0 |
| NCSTN     | 0,440670086 | 0,381034184 | 0 | N.A. | 0 |
| STK40     | 0,440378372 | 0,459068596 | 0 | N.A. | 0 |
| MAPKAPK2  | 0,439974688 | 0,349657073 | 0 | N.A. | 0 |
| MUC16     | 0,439661173 | 0,345859342 | 0 | N.A. | 0 |
| AOC1      | 0,43956455  | 0,59106449  | 0 | N.A. | 0 |
| TMEM181   | 0,439557839 | 0,430286544 | 0 | N.A. | 0 |
| PARM1     | 0,438960053 | 0,1329815   | 0 | N.A. | 0 |
| PLK3      | 0,438754359 | 0,550023597 | 0 | N.A. | 0 |
| ZNF292    | 0,438714329 | 0,44667265  | 0 | N.A. | 0 |
| PXDC1     | 0,438704021 | 0,470784906 | 0 | N.A. | 0 |
| HPGD      | 0,438662752 | 0,523530439 | 0 | N.A. | 0 |
| GPC1      | 0,438526147 | 0,583100944 | 0 | N.A. | 0 |
| SPPL2A    | 0,438461625 | 0,642625837 | 0 | N.A. | 0 |
| FGFBP1    | 0,438418449 | 0,577457936 | 0 | N.A. | 0 |
| H1FO      | 0,438376239 | 0,455693293 | 0 | N.A. | 0 |
| GPCPD1    | 0,437974989 | 0,355655271 | 0 | N.A. | 0 |
| JAG1      | 0,437951287 | 0,645908302 | 0 | N.A. | 0 |
| ABTB2     | 0,437947777 | 0,350341764 | 0 | N.A. | 0 |

|          |             |              |   |      |   |
|----------|-------------|--------------|---|------|---|
| RAB4B    | 0,437932703 | 0,224358733  | 0 | N.A. | 0 |
| BMPR2    | 0,437531574 | 0,491399857  | 0 | N.A. | 0 |
| GPR115   | 0,437496403 | 0,559271226  | 0 | N.A. | 0 |
| ARHGAP42 | 0,437345037 | 0,425166545  | 0 | N.A. | 0 |
| RBMS2    | 0,437156691 | 0,303713221  | 0 | N.A. | 0 |
| SSUH2    | 0,437047098 | 0,427915028  | 0 | N.A. | 0 |
| FAM3C    | 0,436787318 | 0,605224751  | 0 | N.A. | 0 |
| SEMA3C   | 0,436193003 | 0,309821044  | 0 | N.A. | 0 |
| KCNK5    | 0,435823105 | 0,332503853  | 0 | N.A. | 0 |
| LAMA5    | 0,435812991 | 0,38725887   | 0 | N.A. | 0 |
| RHCG     | 0,435244263 | 0,356547604  | 0 | N.A. | 0 |
| PNPLA8   | 0,434909192 | 0,261189419  | 0 | N.A. | 0 |
| CTTN     | 0,434620809 | 0,693800298  | 0 | N.A. | 0 |
| ATL3     | 0,434274671 | 0,075600552  | 0 | N.A. | 0 |
| GIPC1    | 0,434145002 | 0,701816618  | 0 | N.A. | 0 |
| NEK7     | 0,434040188 | 0,493768125  | 0 | N.A. | 0 |
| WASL     | 0,433796574 | 0,466637222  | 0 | N.A. | 0 |
| PRAP1    | 0,433669466 | 0,512621068  | 0 | N.A. | 0 |
| NOS2     | 0,43366594  | 0,340766327  | 0 | N.A. | 0 |
| B3GNT5   | 0,43303103  | 0,436989832  | 0 | N.A. | 0 |
| GNA13    | 0,432779642 | 0,231727654  | 0 | N.A. | 0 |
| IFI35    | 0,43257185  | 0,430369669  | 0 | N.A. | 0 |
| TPT1     | 0,432444785 | -0,220462111 | 0 | N.A. | 0 |
| CAPN8    | 0,432214723 | 0,628046608  | 0 | N.A. | 0 |
| PPP1R11  | 0,432061301 | 0,030908349  | 0 | N.A. | 0 |
| LATS2    | 0,431939299 | 0,575185291  | 0 | N.A. | 0 |
| RAB10    | 0,43189775  | 0,536134914  | 0 | N.A. | 0 |
| PTBP3    | 0,431583826 | 0,185976735  | 0 | N.A. | 0 |
| TSPAN8   | 0,431364979 | 0,448481783  | 0 | N.A. | 0 |
| NBL1     | 0,431111979 | 0,748993499  | 0 | N.A. | 0 |
| MYL9     | 0,430985202 | 0,122149176  | 0 | N.A. | 0 |
| TRAF4    | 0,430963786 | 0,700266539  | 0 | N.A. | 0 |
| TNFSF9   | 0,430813127 | 0,316493508  | 0 | N.A. | 0 |

|              |                    |                    |          |            |   |
|--------------|--------------------|--------------------|----------|------------|---|
| TNFSF15      | 0,430648129        | 0,425583974        | 0        | N.A.       | 0 |
| SLC5A3       | 0,43051672         | 0,644956872        | 0        | N.A.       | 0 |
| SLC11A2      | 0,430215939        | 0,485396314        | 0        | N.A.       | 0 |
| ADM          | 0,430186642        | 0,518769779        | 0        | N.A.       | 0 |
| HAS3         | 0,429994759        | 0,140450589        | 0        | N.A.       | 0 |
| CEP170B      | 0,429628413        | 0,443229438        | 0        | N.A.       | 0 |
| RETSAT       | 0,429370855        | 0,673616368        | 0        | N.A.       | 0 |
| ITGB8        | 0,429110043        | 0,65520502         | 0        | N.A.       | 0 |
| CNGA1        | 0,428977877        | 0,144473815        | 0        | N.A.       | 0 |
| ITPK1        | 0,428892792        | 0,466259014        | 0        | N.A.       | 0 |
| CLCF1        | 0,428889737        | 0,670003702        | 0        | N.A.       | 0 |
| ADIPOR2      | 0,428775512        | 0,58244489         | 0        | N.A.       | 0 |
| FAT1         | 0,42864841         | 0,464464799        | 0        | N.A.       | 0 |
| JAK1         | 0,428524007        | 0,384058457        | 0        | N.A.       | 0 |
| FAM160A2     | 0,428312576        | 0,523469393        | 0        | N.A.       | 0 |
| MAP7D1       | 0,428252513        | 0,468165144        | 0        | N.A.       | 0 |
| FRMD3        | 0,428225471        | 0,333489864        | 0        | N.A.       | 0 |
| CD58         | 0,428141899        | 0,449441942        | 0        | N.A.       | 0 |
| FRMD4B       | 0,427989782        | 0,225116315        | 0        | N.A.       | 0 |
| INO80C       | 0,427693645        | 0,46067128         | 0        | N.A.       | 0 |
| INSR         | 0,427566643        | 0,575468873        | 0        | N.A.       | 0 |
| <b>VSIG2</b> | <b>0,427416759</b> | <b>0,613713867</b> | <b>1</b> | <b>cl1</b> | 0 |
| THRB         | 0,427086786        | 0,481997966        | 0        | N.A.       | 0 |
| C19orf66     | 0,427079421        | 0,605833481        | 0        | N.A.       | 0 |
| TSPAN14      | 0,427045594        | 0,695404928        | 0        | N.A.       | 0 |
| COBL         | 0,426840707        | 0,51281019         | 0        | N.A.       | 0 |
| UBE2R2       | 0,426585292        | 0,668529061        | 0        | N.A.       | 0 |
| GALNT3       | 0,42657325         | 0,553664102        | 0        | N.A.       | 0 |
| KDM3A        | 0,426305157        | 0,219640559        | 0        | N.A.       | 0 |
| SLC35C1      | 0,426119078        | 0,591292305        | 0        | N.A.       | 0 |
| ARHGEF35     | 0,426080312        | 0,57878155         | 0        | N.A.       | 0 |
| PLA2G16      | 0,425561174        | 0,513150736        | 0        | N.A.       | 0 |
| RHOB         | 0,425033753        | 0,340484188        | 0        | N.A.       | 0 |

|             |                    |                    |          |            |   |
|-------------|--------------------|--------------------|----------|------------|---|
| HMOX1       | 0,424996144        | 0,452478706        | 0        | N.A.       | 0 |
| GOLGA3      | 0,424979332        | 0,387405408        | 0        | N.A.       | 0 |
| HAPLN3      | 0,424847736        | 0,422879448        | 0        | N.A.       | 0 |
| FNIP2       | 0,424746792        | 0,463261536        | 0        | N.A.       | 0 |
| SMPD3       | 0,424380816        | 0,34214884         | 0        | N.A.       | 0 |
| EHD4        | 0,424191346        | 0,649380587        | 0        | N.A.       | 0 |
| LDLR        | 0,423753743        | 0,627731293        | 0        | N.A.       | 0 |
| SERPINB9    | 0,423411376        | 0,281455679        | 0        | N.A.       | 0 |
| PRRT2       | 0,423393079        | 0,082238666        | 0        | N.A.       | 0 |
| OAS2        | 0,422834557        | 0,463825582        | 0        | N.A.       | 0 |
| <b>KLK6</b> | <b>0,422497121</b> | <b>0,419212671</b> | <b>1</b> | <b>cl1</b> | 0 |
| PML         | 0,422476221        | 0,436668321        | 0        | N.A.       | 0 |
| ARL4C       | 0,422342349        | 0,081464628        | 0        | N.A.       | 0 |
| LPGAT1      | 0,422160832        | 0,376452854        | 0        | N.A.       | 0 |
| C10orf10    | 0,422119412        | 0,280303503        | 0        | N.A.       | 0 |
| RAP1B       | 0,422023083        | -0,024769068       | 0        | N.A.       | 0 |
| CDC42BPA    | 0,42179777         | 0,482431113        | 0        | N.A.       | 0 |
| ZBTB7A      | 0,421600082        | 0,58841703         | 0        | N.A.       | 0 |
| ERBB2       | 0,421429711        | 0,655779783        | 0        | N.A.       | 0 |
| TRAK1       | 0,421356011        | 0,517927634        | 0        | N.A.       | 0 |
| SH3D21      | 0,420711455        | 0,535598645        | 0        | N.A.       | 0 |
| ZFAND5      | 0,420701672        | 0,333641326        | 0        | N.A.       | 0 |
| BBC3        | 0,420551618        | 0,403290012        | 0        | N.A.       | 0 |
| AHR         | 0,420531758        | 0,354327266        | 0        | N.A.       | 0 |
| FGD4        | 0,419358869        | 0,513694955        | 0        | N.A.       | 0 |
| MAP3K11     | 0,419080366        | 0,51997654         | 0        | N.A.       | 0 |
| MFGE8       | 0,419051179        | 0,478632194        | 0        | N.A.       | 0 |
| PARP14      | 0,419038835        | 0,6263058          | 0        | N.A.       | 0 |
| FAM134C     | 0,418803075        | 0,584841288        | 0        | N.A.       | 0 |
| MEGF6       | 0,418587599        | 0,489446523        | 0        | N.A.       | 0 |
| MINK1       | 0,418545313        | 0,467726508        | 0        | N.A.       | 0 |
| PIK3CB      | 0,418431793        | 0,379878434        | 0        | N.A.       | 0 |
| PTK2B       | 0,418362603        | 0,6143092          | 0        | N.A.       | 0 |

|             |             |             |   |      |   |
|-------------|-------------|-------------|---|------|---|
| OSGIN1      | 0,418279111 | 0,310211552 | 0 | N.A. | 0 |
| TMC7        | 0,418224755 | 0,36507954  | 0 | N.A. | 0 |
| APLP2       | 0,418196717 | 0,740220691 | 0 | N.A. | 0 |
| CTDSP1      | 0,418124973 | 0,324366469 | 0 | N.A. | 0 |
| KTN1        | 0,41773325  | 0,614242952 | 0 | N.A. | 0 |
| SH3D19      | 0,41711548  | 0,651349879 | 0 | N.A. | 0 |
| ZBP1        | 0,416720648 | 0,497548448 | 0 | N.A. | 0 |
| BMP1        | 0,416554629 | 0,409127207 | 0 | N.A. | 0 |
| AFF4        | 0,416439729 | 0,53436696  | 0 | N.A. | 0 |
| TNKS1BP1    | 0,416437098 | 0,608783955 | 0 | N.A. | 0 |
| C4orf48     | 0,416423474 | 0,411968135 | 0 | N.A. | 0 |
| TPCN1       | 0,416310953 | 0,532151156 | 0 | N.A. | 0 |
| BCL3        | 0,416300271 | 0,434556453 | 0 | N.A. | 0 |
| SNRK        | 0,416287011 | 0,477751254 | 0 | N.A. | 0 |
| TNFAIP2     | 0,416179957 | 0,49782015  | 0 | N.A. | 0 |
| RYBP        | 0,415924508 | 0,296959928 | 0 | N.A. | 0 |
| CTAGE5      | 0,415809191 | 0,388415072 | 0 | N.A. | 0 |
| GABRE       | 0,415774948 | 0,463877558 | 0 | N.A. | 0 |
| PHF1        | 0,415447405 | 0,300905593 | 0 | N.A. | 0 |
| DDX17       | 0,415329888 | 0,495980969 | 0 | N.A. | 0 |
| GRAMD3      | 0,415249726 | 0,422170339 | 0 | N.A. | 0 |
| ABI1        | 0,415132482 | 0,301230124 | 0 | N.A. | 0 |
| UBE2B       | 0,414796914 | 0,520978412 | 0 | N.A. | 0 |
| LAMB2       | 0,41460186  | 0,534711051 | 0 | N.A. | 0 |
| KIAA2026    | 0,414264816 | 0,506858246 | 0 | N.A. | 0 |
| ETV6        | 0,414245172 | 0,330327927 | 0 | N.A. | 0 |
| NSMF        | 0,413961933 | 0,559779261 | 0 | N.A. | 0 |
| RHOA        | 0,413823744 | 0,390752727 | 0 | N.A. | 0 |
| TMEM65      | 0,413708329 | 0,35997543  | 0 | N.A. | 0 |
| SLC35D2     | 0,413319031 | 0,298222748 | 0 | N.A. | 0 |
| TM4SF5      | 0,412861614 | 0,627541122 | 0 | N.A. | 0 |
| RP11-395B7. | 0,412695544 | 0,385483206 | 0 | N.A. | 0 |
| DHRS3       | 0,412694601 | 0,646735433 | 0 | N.A. | 0 |

|             |             |              |   |      |   |
|-------------|-------------|--------------|---|------|---|
| PPP1R15B    | 0,41215841  | 0,435825801  | 0 | N.A. | 0 |
| P2RY2       | 0,411889382 | 0,098022664  | 0 | N.A. | 0 |
| RP11-467L13 | 0,411626619 | 0,366878816  | 0 | N.A. | 0 |
| RAPGEFL1    | 0,411510609 | 0,619878369  | 0 | N.A. | 0 |
| SPRR3       | 0,41106944  | 0,406330771  | 0 | N.A. | 0 |
| CCRL2       | 0,410962428 | 0,105648307  | 0 | N.A. | 0 |
| TMEM219     | 0,410908375 | 0,402315382  | 0 | N.A. | 0 |
| ST3GAL1     | 0,41083801  | 0,557821133  | 0 | N.A. | 0 |
| CEBPG       | 0,410766742 | 0,576038751  | 0 | N.A. | 0 |
| TMEM164     | 0,410279336 | 0,434425124  | 0 | N.A. | 0 |
| FAM177A1    | 0,40998635  | 0,42205021   | 0 | N.A. | 0 |
| PTRF        | 0,409809698 | 0,264369911  | 0 | N.A. | 0 |
| ST6GALNAC2  | 0,4097697   | 0,051795596  | 0 | N.A. | 0 |
| NR1H2       | 0,409238797 | 0,070180352  | 0 | N.A. | 0 |
| TNNC1       | 0,409214712 | 0,256556749  | 0 | N.A. | 0 |
| TC2N        | 0,409117399 | 0,470173587  | 0 | N.A. | 0 |
| ICAM1       | 0,408782055 | 0,198055474  | 0 | N.A. | 0 |
| SLC10A3     | 0,408762645 | 0,391086577  | 0 | N.A. | 0 |
| CCPG1       | 0,408744609 | 0,228674039  | 0 | N.A. | 0 |
| SPTAN1      | 0,408723801 | 0,648449028  | 0 | N.A. | 0 |
| WLS         | 0,408715653 | 0,579678269  | 0 | N.A. | 0 |
| PPP4R1      | 0,408457301 | 0,522048649  | 0 | N.A. | 0 |
| HIST1H1C    | 0,408289639 | 0,183084036  | 0 | N.A. | 0 |
| PACS1       | 0,408255746 | -0,031189424 | 0 | N.A. | 0 |
| AP003068.23 | 0,407565213 | 0,260744639  | 0 | N.A. | 0 |
| WDR45B      | 0,4075085   | 0,493252328  | 0 | N.A. | 0 |
| AC006262.5  | 0,407230571 | 0,595142975  | 0 | N.A. | 0 |
| SPAG4       | 0,40703544  | 0,049579246  | 0 | N.A. | 0 |
| CTBS        | 0,406547529 | 0,146184656  | 0 | N.A. | 0 |
| LY6D        | 0,406274892 | 0,336809208  | 0 | N.A. | 0 |
| SHROOM1     | 0,40623513  | 0,445694169  | 0 | N.A. | 0 |
| CYTH3       | 0,406051206 | 0,335488729  | 0 | N.A. | 0 |
| NPLOC4      | 0,405686617 | 0,368330146  | 0 | N.A. | 0 |

|              |                    |                    |          |            |   |
|--------------|--------------------|--------------------|----------|------------|---|
| MESDC1       | 0,405595224        | 0,292878835        | 0        | N.A.       | 0 |
| BTG1         | 0,405220374        | 0,283507515        | 0        | N.A.       | 0 |
| LINC00152    | 0,405171813        | -0,043000732       | 0        | N.A.       | 0 |
| ZNF562       | 0,405105728        | 0,38255164         | 0        | N.A.       | 0 |
| TANC1        | 0,4046376          | 0,488983304        | 0        | N.A.       | 0 |
| MBOAT2       | 0,404607432        | 0,644541866        | 0        | N.A.       | 0 |
| ABCC3        | 0,404583447        | 0,650258053        | 0        | N.A.       | 0 |
| KRAS         | 0,404545211        | 0,592043451        | 0        | N.A.       | 0 |
| DEFB1        | 0,404501956        | 0,15194214         | 0        | N.A.       | 0 |
| SAMD8        | 0,404328832        | -0,019848075       | 0        | N.A.       | 0 |
| U47924.27    | 0,403952834        | 0,226893046        | 0        | N.A.       | 0 |
| HCFC1R1      | 0,403881013        | -0,151191688       | 0        | N.A.       | 0 |
| PIK3C2B      | 0,403844685        | 0,275358561        | 0        | N.A.       | 0 |
| PELI2        | 0,403542436        | 0,170078916        | 0        | N.A.       | 0 |
| SNX33        | 0,403502609        | 0,193692372        | 0        | N.A.       | 0 |
| CORO2A       | 0,403440617        | 0,616381229        | 0        | N.A.       | 0 |
| RAP2C        | 0,403437423        | 0,098714407        | 0        | N.A.       | 0 |
| SERPINB1     | 0,403111339        | 0,436029522        | 0        | N.A.       | 0 |
| APOBEC1      | 0,403040114        | 0,164361026        | 0        | N.A.       | 0 |
| UBE2Z        | 0,402800742        | 0,363562356        | 0        | N.A.       | 0 |
| LAIR2        | 0,402747508        | 0,033619399        | 0        | N.A.       | 0 |
| CTGF         | 0,402730579        | 0,499546118        | 0        | N.A.       | 0 |
| GPR35        | 0,402438716        | 0,535741598        | 0        | N.A.       | 0 |
| CDKN2A       | 0,402390013        | 0,590180696        | 0        | N.A.       | 0 |
| YPEL3        | 0,402377685        | 0,592304078        | 0        | N.A.       | 0 |
| <b>GDPD3</b> | <b>0,402145771</b> | <b>0,499391077</b> | <b>1</b> | <b>cl1</b> | 0 |
| TPPP         | 0,40211452         | 0,236716207        | 0        | N.A.       | 0 |
| <b>WFDC3</b> | <b>0,402077701</b> | <b>0,394331188</b> | <b>1</b> | <b>cl1</b> | 0 |
| CARD10       | 0,401517686        | 0,554103442        | 0        | N.A.       | 0 |
| KLF4         | 0,401109545        | 0,379811591        | 0        | N.A.       | 0 |
| ATP11B       | 0,400991027        | 0,427714105        | 0        | N.A.       | 0 |
| ARHGAP26     | 0,400894674        | 0,277516993        | 0        | N.A.       | 0 |
| ATP6VOE1     | 0,400816911        | 0,555835771        | 0        | N.A.       | 0 |



|             |             |              |   |      |   |
|-------------|-------------|--------------|---|------|---|
| TCN2        | 0,400368573 | 0,674563413  | 0 | N.A. | 0 |
| PQLC3       | 0,400298467 | 0,545657329  | 0 | N.A. | 0 |
| SYNPO       | 0,400224147 | 0,316088648  | 0 | N.A. | 0 |
| ACVRL1      | 0,400194996 | 0,19052084   | 0 | N.A. | 0 |
| PIM3        | 0,400170537 | 0,395319187  | 0 | N.A. | 0 |
| PACSIN2     | 0,400114169 | 0,551987423  | 0 | N.A. | 0 |
| OSMR        | 0,400100965 | -0,123883935 | 0 | N.A. | 0 |
| SLC12A4     | 0,400080431 | 0,343556414  | 0 | N.A. | 0 |
| SMG1        | 0,400029579 | 0,451917909  | 0 | N.A. | 0 |
| IRAK2       | 0,399945006 | 0,234569935  | 0 | N.A. | 0 |
| WDR45       | 0,399882159 | 0,270295567  | 0 | N.A. | 0 |
| IL6ST       | 0,399815181 | 0,431702068  | 0 | N.A. | 0 |
| RIN2        | 0,399446435 | 0,344858536  | 0 | N.A. | 0 |
| MAFF        | 0,399436374 | 0,595028678  | 0 | N.A. | 0 |
| EGLN1       | 0,399250038 | 0,378696866  | 0 | N.A. | 0 |
| MTRNR2L8    | 0,399213383 | 0,082871708  | 0 | N.A. | 0 |
| CD82        | 0,3991838   | 0,634527685  | 0 | N.A. | 0 |
| RAMP1       | 0,399157052 | 0,396179191  | 0 | N.A. | 0 |
| TMEM184A    | 0,39904649  | 0,344946433  | 0 | N.A. | 0 |
| CTDSP2      | 0,398700394 | 0,412854541  | 0 | N.A. | 0 |
| RP11-411K7. | 0,39869582  | 0,290296544  | 0 | N.A. | 0 |
| FBXW5       | 0,398237633 | 0,720820063  | 0 | N.A. | 0 |
| ARHGAP8     | 0,398219962 | 0,362572895  | 0 | N.A. | 0 |
| LY6G6C      | 0,398194204 | 0,224129681  | 0 | N.A. | 0 |
| CES2        | 0,397955475 | 0,283207222  | 0 | N.A. | 0 |
| NCKAP1      | 0,397702736 | 0,551446027  | 0 | N.A. | 0 |
| CAV2        | 0,397687548 | 0,695563775  | 0 | N.A. | 0 |
| MMP28       | 0,39742917  | 0,537540243  | 0 | N.A. | 0 |
| CLIC4       | 0,397391457 | -0,015755785 | 0 | N.A. | 0 |
| CACNG4      | 0,397094549 | 0,270107072  | 0 | N.A. | 0 |
| XAF1        | 0,397032767 | 0,42445057   | 0 | N.A. | 0 |
| TMCC1       | 0,396882254 | 0,343745341  | 0 | N.A. | 0 |
| IFNLR1      | 0,396601006 | 0,300972186  | 0 | N.A. | 0 |

|            |             |              |   |      |   |
|------------|-------------|--------------|---|------|---|
| S100A3     | 0,396555515 | 0,10173849   | 0 | N.A. | 0 |
| TMEM159    | 0,396518821 | 0,519754963  | 0 | N.A. | 0 |
| HLA-A      | 0,396451419 | 0,54591721   | 0 | N.A. | 0 |
| AC093673.5 | 0,396237277 | -0,184318944 | 0 | N.A. | 0 |
| GNA11      | 0,396159716 | 0,548663337  | 0 | N.A. | 0 |
| DENND5B    | 0,39595232  | 0,439824744  | 0 | N.A. | 0 |
| CRIP1      | 0,395579733 | 0,290746919  | 0 | N.A. | 0 |
| FBLIM1     | 0,395536946 | 0,558764981  | 0 | N.A. | 0 |
| FAM134B    | 0,395495948 | 0,369866796  | 0 | N.A. | 0 |
| SPRR2D     | 0,39540413  | 0,154213377  | 0 | N.A. | 0 |
| PDE9A      | 0,395308324 | 0,056260406  | 0 | N.A. | 0 |
| KIF16B     | 0,395154309 | 0,307465328  | 0 | N.A. | 0 |
| ZNF165     | 0,395099338 | 0,228907399  | 0 | N.A. | 0 |
| ARSD       | 0,395075662 | 0,548075094  | 0 | N.A. | 0 |
| RSPH3      | 0,394813692 | 0,259595603  | 0 | N.A. | 0 |
| TOR1AIP2   | 0,39478607  | 0,648316249  | 0 | N.A. | 0 |
| RASSF7     | 0,394499297 | 0,808946434  | 0 | N.A. | 0 |
| CLDN7      | 0,394481228 | 0,598178509  | 0 | N.A. | 0 |
| PRR5L      | 0,394464928 | 0,261782413  | 0 | N.A. | 0 |
| PDLIM7     | 0,394063767 | 0,376188214  | 0 | N.A. | 0 |
| DAZAP2     | 0,394004875 | -0,049312921 | 0 | N.A. | 0 |
| MGAT4A     | 0,393857819 | 0,233458041  | 0 | N.A. | 0 |
| TNFRSF14   | 0,393595103 | 0,518282096  | 0 | N.A. | 0 |
| CCK        | 0,393528872 | 0,174019155  | 0 | N.A. | 0 |
| SLC37A1    | 0,392853105 | 0,661666654  | 0 | N.A. | 0 |
| HGSNAT     | 0,392644349 | 0,611242624  | 0 | N.A. | 0 |
| PTGES      | 0,392385795 | 0,347985747  | 0 | N.A. | 0 |
| SAMD4A     | 0,392288904 | 0,496287279  | 0 | N.A. | 0 |
| IL10RB     | 0,392189049 | 0,563399541  | 0 | N.A. | 0 |
| NPAS2      | 0,392081203 | 0,333103052  | 0 | N.A. | 0 |
| LPIN3      | 0,391987382 | 0,275025166  | 0 | N.A. | 0 |
| ITGB5      | 0,39196922  | 0,67995202   | 0 | N.A. | 0 |
| CH17-360D5 | 0,391728322 | 0,532496733  | 0 | N.A. | 0 |

|              |             |              |   |      |   |
|--------------|-------------|--------------|---|------|---|
| PPP1R16A     | 0,39167982  | 0,43214126   | 0 | N.A. | 0 |
| SHH          | 0,391613537 | 0,115639647  | 0 | N.A. | 0 |
| GDI1         | 0,391184408 | 0,50815573   | 0 | N.A. | 0 |
| AC005256.1   | 0,391161987 | 0,277325721  | 0 | N.A. | 0 |
| IKZF2        | 0,391062234 | 0,169164614  | 0 | N.A. | 0 |
| IGF2BP2      | 0,391060441 | 0,499339403  | 0 | N.A. | 0 |
| SLC35E1      | 0,391047334 | 0,37107892   | 0 | N.A. | 0 |
| BCAS1        | 0,390851101 | 0,680863411  | 0 | N.A. | 0 |
| TNFRSF10B    | 0,390753374 | 0,485963949  | 0 | N.A. | 0 |
| NT5C2        | 0,390720609 | 0,338833375  | 0 | N.A. | 0 |
| SLC6A9       | 0,390478293 | 0,132492448  | 0 | N.A. | 0 |
| RP1-313I6.12 | 0,390374963 | 0,042923395  | 0 | N.A. | 0 |
| CYP4F11      | 0,390174411 | 0,458209329  | 0 | N.A. | 0 |
| PFKFB2       | 0,390143881 | 0,197355603  | 0 | N.A. | 0 |
| CKB          | 0,389993009 | 0,539059809  | 0 | N.A. | 0 |
| KIAA1671     | 0,389968439 | 0,395249433  | 0 | N.A. | 0 |
| UPK2         | 0,389938354 | -0,121395299 | 0 | N.A. | 0 |
| ONECUT3      | 0,38993218  | 0,093391965  | 0 | N.A. | 0 |
| ATP8B1       | 0,389785677 | 0,318791501  | 0 | N.A. | 0 |
| CACFD1       | 0,389678922 | 0,663556819  | 0 | N.A. | 0 |
| RAB21        | 0,389515289 | 0,523332737  | 0 | N.A. | 0 |
| RELA         | 0,389392788 | 0,247609799  | 0 | N.A. | 0 |
| KDM1B        | 0,389008165 | 0,210204065  | 0 | N.A. | 0 |
| B3GNT8       | 0,388696709 | 0,294763489  | 0 | N.A. | 0 |
| CREBRF       | 0,388505638 | 0,319328738  | 0 | N.A. | 0 |
| PTEN         | 0,388454241 | 0,080273383  | 0 | N.A. | 0 |
| ENTPD2       | 0,387993856 | 0,454342133  | 0 | N.A. | 0 |
| VPS37B       | 0,387840107 | 0,505883875  | 0 | N.A. | 0 |
| SEMA6A       | 0,38728478  | 0,182451651  | 0 | N.A. | 0 |
| VEZT         | 0,387128323 | 0,524726648  | 0 | N.A. | 0 |
| VCL          | 0,38690034  | 0,507285106  | 0 | N.A. | 0 |
| RABAC1       | 0,386666903 | 0,422805769  | 0 | N.A. | 0 |
| TSC22D4      | 0,386252528 | 0,315654206  | 0 | N.A. | 0 |

|           |             |              |   |      |   |
|-----------|-------------|--------------|---|------|---|
| LGALS1    | 0,386075456 | 0,281155181  | 0 | N.A. | 0 |
| BLCAP     | 0,385972962 | 0,561845459  | 0 | N.A. | 0 |
| SOCS6     | 0,385907278 | 0,228525706  | 0 | N.A. | 0 |
| MPPE1     | 0,385882982 | 0,365824069  | 0 | N.A. | 0 |
| ATP6V1D   | 0,385713331 | 0,313813837  | 0 | N.A. | 0 |
| FBXO11    | 0,385530374 | 0,093785088  | 0 | N.A. | 0 |
| LSMEM1    | 0,385493335 | 0,379336771  | 0 | N.A. | 0 |
| DUSP6     | 0,385114155 | 0,388329042  | 0 | N.A. | 0 |
| RAPGEF2   | 0,385092413 | 0,61702884   | 0 | N.A. | 0 |
| GOLM1     | 0,385068428 | 0,422647362  | 0 | N.A. | 0 |
| PQLC1     | 0,385036635 | 0,429074579  | 0 | N.A. | 0 |
| DNASE1L1  | 0,385009281 | 0,119784509  | 0 | N.A. | 0 |
| PHLDA2    | 0,384940552 | 0,689888686  | 0 | N.A. | 0 |
| DPY19L1   | 0,384643092 | 0,490251888  | 0 | N.A. | 0 |
| SEL1L     | 0,384602026 | 0,382323162  | 0 | N.A. | 0 |
| SLC41A2   | 0,384183815 | 0,430684841  | 0 | N.A. | 0 |
| SAA2      | 0,384148648 | 0,521409146  | 0 | N.A. | 0 |
| EPPK1     | 0,384002892 | 0,3978523    | 0 | N.A. | 0 |
| SP140L    | 0,383960768 | 0,274721482  | 0 | N.A. | 0 |
| LAMA4     | 0,383538148 | 0,143773673  | 0 | N.A. | 0 |
| MAP3K8    | 0,383447141 | 0,152007877  | 0 | N.A. | 0 |
| PDLIM2    | 0,383114478 | 0,312637301  | 0 | N.A. | 0 |
| CCDC120   | 0,383086192 | 0,551400598  | 0 | N.A. | 0 |
| DDX60L    | 0,382895526 | 0,47000923   | 0 | N.A. | 0 |
| RNF141    | 0,382797295 | 0,06846283   | 0 | N.A. | 0 |
| EDN2      | 0,382696445 | 0,311776501  | 0 | N.A. | 0 |
| CUX1      | 0,382513767 | 0,309866049  | 0 | N.A. | 0 |
| ERRFI1    | 0,382344969 | 0,691817867  | 0 | N.A. | 0 |
| CHST4     | 0,382130137 | -0,003320721 | 0 | N.A. | 0 |
| SPATA2L   | 0,382101534 | 0,090953536  | 0 | N.A. | 0 |
| GABARAPL1 | 0,38204768  | 0,300027753  | 0 | N.A. | 0 |
| LRCH4     | 0,381849784 | 0,353079401  | 0 | N.A. | 0 |
| NEBL      | 0,381767483 | 0,54884866   | 0 | N.A. | 0 |

|            |             |              |   |      |   |
|------------|-------------|--------------|---|------|---|
| MFSD6      | 0,38134486  | 0,315306735  | 0 | N.A. | 0 |
| ELK3       | 0,381277203 | 0,219835763  | 0 | N.A. | 0 |
| CREB3      | 0,381251168 | 0,331831267  | 0 | N.A. | 0 |
| PRR15      | 0,381224014 | 0,399018617  | 0 | N.A. | 0 |
| ARL5B      | 0,381135302 | 0,428035878  | 0 | N.A. | 0 |
| PRKD2      | 0,380797909 | 0,287662827  | 0 | N.A. | 0 |
| LRCH1      | 0,380728288 | 0,47996353   | 0 | N.A. | 0 |
| KIAA0232   | 0,380650065 | 0,438498518  | 0 | N.A. | 0 |
| ABHD11     | 0,38055054  | 0,297479728  | 0 | N.A. | 0 |
| SESN2      | 0,380547721 | 0,580388968  | 0 | N.A. | 0 |
| CNKSR3     | 0,37972121  | 0,427811029  | 0 | N.A. | 0 |
| ACOX1      | 0,379682098 | 0,47654866   | 0 | N.A. | 0 |
| KDM4B      | 0,379554065 | 0,460376414  | 0 | N.A. | 0 |
| CDKN2B-AS1 | 0,379446639 | 0,277611142  | 0 | N.A. | 0 |
| MICALL2    | 0,379429642 | 0,663077698  | 0 | N.A. | 0 |
| IGFL1      | 0,379376902 | 0,315398309  | 0 | N.A. | 0 |
| PJA2       | 0,379187419 | 0,011327052  | 0 | N.A. | 0 |
| DNAJB2     | 0,378810446 | 0,571108142  | 0 | N.A. | 0 |
| SAMD9L     | 0,378751353 | 0,423061906  | 0 | N.A. | 0 |
| ADM2       | 0,378622965 | 0,323540454  | 0 | N.A. | 0 |
| VAT1       | 0,378565254 | 0,360976687  | 0 | N.A. | 0 |
| PSD4       | 0,378318349 | 0,636749381  | 0 | N.A. | 0 |
| UNC5B      | 0,377957032 | 0,320655895  | 0 | N.A. | 0 |
| FRK        | 0,377744588 | 0,605494441  | 0 | N.A. | 0 |
| LANCL3     | 0,377580372 | 0,272636367  | 0 | N.A. | 0 |
| IL1RAP     | 0,377552662 | 0,224202773  | 0 | N.A. | 0 |
| GBP1       | 0,377474043 | -0,037423043 | 0 | N.A. | 0 |
| TAB2       | 0,377454789 | 0,241739064  | 0 | N.A. | 0 |
| FAM120AOS  | 0,376995785 | 0,105403174  | 0 | N.A. | 0 |
| IFNAR2     | 0,376993618 | 0,393944508  | 0 | N.A. | 0 |
| TTYH3      | 0,376890981 | 0,424777482  | 0 | N.A. | 0 |
| VAMP8      | 0,376805136 | 0,538623156  | 0 | N.A. | 0 |
| ZFP36L1    | 0,375942051 | 0,454816702  | 0 | N.A. | 0 |

|             |             |              |   |      |   |
|-------------|-------------|--------------|---|------|---|
| PLA2G2F     | 0,375818157 | 0,323986409  | 0 | N.A. | 0 |
| SPINK1      | 0,375817808 | 0,145582601  | 0 | N.A. | 0 |
| TM4SF4      | 0,375786695 | 0,482756223  | 1 | cls4 | 0 |
| NPAS1       | 0,375704718 | 0,376522557  | 0 | N.A. | 0 |
| LGALS3      | 0,375618402 | 0,505290735  | 0 | N.A. | 0 |
| SH3PXD2A-A  | 0,375580291 | 0,141128625  | 0 | N.A. | 0 |
| WSB1        | 0,3752936   | 0,512318693  | 0 | N.A. | 0 |
| C3orf52     | 0,37460145  | 0,508031168  | 0 | N.A. | 0 |
| TMEM53      | 0,374414828 | 0,282155513  | 0 | N.A. | 0 |
| PARP8       | 0,374412746 | 0,471758673  | 0 | N.A. | 0 |
| DYNLT3      | 0,374183281 | 0,277436561  | 0 | N.A. | 0 |
| DPCR1       | 0,374177714 | -0,041725672 | 0 | N.A. | 0 |
| CLDN3       | 0,374072493 | 0,405486759  | 0 | N.A. | 0 |
| MED13L      | 0,373965407 | 0,38717862   | 0 | N.A. | 0 |
| MUC20       | 0,373752849 | 0,665379709  | 0 | N.A. | 0 |
| MOSPD1      | 0,373670361 | 0,403417456  | 0 | N.A. | 0 |
| MNT         | 0,373651753 | 0,154643412  | 0 | N.A. | 0 |
| C15orf39    | 0,373585733 | 0,392899015  | 0 | N.A. | 0 |
| ADIRF       | 0,373417497 | 0,174029921  | 0 | N.A. | 0 |
| MAP3K2      | 0,373364086 | 0,535794414  | 0 | N.A. | 0 |
| HLA-C       | 0,373071937 | 0,371336494  | 0 | N.A. | 0 |
| MARCKS      | 0,37294437  | 0,199723881  | 0 | N.A. | 0 |
| ACAP2       | 0,372404509 | 0,375345443  | 0 | N.A. | 0 |
| RP11-462L8. | 0,372317479 | 0,378153047  | 0 | N.A. | 0 |
| CRY2        | 0,372210931 | 0,452974444  | 0 | N.A. | 0 |
| ZSWIM4      | 0,372145643 | 0,320972868  | 0 | N.A. | 0 |
| RANBP9      | 0,371897199 | 0,353052293  | 0 | N.A. | 0 |
| IFNAR1      | 0,371874756 | 0,304285341  | 0 | N.A. | 0 |
| ATP2B1      | 0,371821908 | 0,502983741  | 0 | N.A. | 0 |
| PAFAH1B1    | 0,371500092 | 0,118779229  | 0 | N.A. | 0 |
| TMEM41B     | 0,371418311 | 0,582999799  | 0 | N.A. | 0 |
| CTTNBP2NL   | 0,371144112 | 0,387515865  | 0 | N.A. | 0 |
| NTN4        | 0,37113327  | 0,144160116  | 0 | N.A. | 0 |

|             |             |              |   |      |   |
|-------------|-------------|--------------|---|------|---|
| VDR         | 0,371083984 | 0,359907501  | 0 | N.A. | 0 |
| AGPAT9      | 0,371065118 | 0,375147235  | 0 | N.A. | 0 |
| CASP7       | 0,371019665 | 0,428319756  | 0 | N.A. | 0 |
| RP11-285E9. | 0,370983281 | 0,385221768  | 0 | N.A. | 0 |
| SERINC3     | 0,37088684  | 0,392440611  | 0 | N.A. | 0 |
| SMG7        | 0,370510478 | 0,614341315  | 0 | N.A. | 0 |
| SLC35F5     | 0,370406307 | 0,489930825  | 0 | N.A. | 0 |
| TMED7       | 0,370008715 | 0,426627526  | 0 | N.A. | 0 |
| CAP1        | 0,369989178 | 0,504539576  | 0 | N.A. | 0 |
| PRSS12      | 0,369908742 | 0,734141549  | 0 | N.A. | 0 |
| WDFY1       | 0,369908362 | 0,311382638  | 0 | N.A. | 0 |
| PFKP        | 0,369730202 | 0,518844298  | 0 | N.A. | 0 |
| NRARP       | 0,36971397  | 0,07710495   | 0 | N.A. | 0 |
| PDXK        | 0,369638664 | 0,663466795  | 0 | N.A. | 0 |
| TMEM59      | 0,36953896  | 0,458886381  | 0 | N.A. | 0 |
| SPIRE2      | 0,369522649 | 0,226779482  | 0 | N.A. | 0 |
| FAM63B      | 0,369202644 | 0,525996923  | 0 | N.A. | 0 |
| MCU         | 0,369175001 | 0,083343191  | 0 | N.A. | 0 |
| FBXO2       | 0,369055872 | 0,371673907  | 0 | N.A. | 0 |
| ALCAM       | 0,368830234 | 0,440778196  | 0 | N.A. | 0 |
| SP100       | 0,36881637  | 0,122541579  | 0 | N.A. | 0 |
| KRT8        | 0,368520789 | 0,63534071   | 0 | N.A. | 0 |
| TPP1        | 0,368515736 | 0,269889837  | 0 | N.A. | 0 |
| IFIT2       | 0,368305104 | 0,403602054  | 0 | N.A. | 0 |
| STEAP4      | 0,367846993 | 0,476640043  | 0 | N.A. | 0 |
| BET1L       | 0,367701783 | 0,20551472   | 0 | N.A. | 0 |
| ZNF524      | 0,367687411 | 0,365789716  | 0 | N.A. | 0 |
| NT5C3A      | 0,367504102 | 0,303107797  | 0 | N.A. | 0 |
| ELF4        | 0,36749705  | -0,044285164 | 0 | N.A. | 0 |
| COL16A1     | 0,367332982 | 0,56608875   | 0 | N.A. | 0 |
| SIRT1       | 0,367321693 | 0,101338253  | 0 | N.A. | 0 |
| GRB10       | 0,367240378 | 0,253900406  | 0 | N.A. | 0 |
| MARVELD2    | 0,36713348  | 0,396155245  | 0 | N.A. | 0 |

|            |             |             |   |      |   |
|------------|-------------|-------------|---|------|---|
| HLA-B      | 0,366894613 | 0,476967    | 0 | N.A. | 0 |
| AP001610.9 | 0,366826393 | 0,326315321 | 0 | N.A. | 0 |
| SHB        | 0,366822495 | 0,31870048  | 0 | N.A. | 0 |
| DENND1B    | 0,366764331 | 0,385052952 | 0 | N.A. | 0 |
| MTRNR2L12  | 0,366717721 | 0,097668043 | 0 | N.A. | 0 |
| BTNL3      | 0,366688249 | 0,398003783 | 0 | N.A. | 0 |
| GIPR       | 0,366577171 | 0,441132545 | 0 | N.A. | 0 |
| ENO2       | 0,366570335 | 0,373291937 | 0 | N.A. | 0 |
| ATXN7      | 0,366491102 | 0,310875755 | 0 | N.A. | 0 |
| PCDH7      | 0,366381815 | 0,102648112 | 0 | N.A. | 0 |
| CCNL1      | 0,366264498 | 0,351483694 | 0 | N.A. | 0 |
| KDM5C      | 0,36625092  | 0,476211957 | 0 | N.A. | 0 |
| NEDD9      | 0,36616344  | 0,525286946 | 0 | N.A. | 0 |
| PSCA       | 0,365992817 | 0,546971186 | 0 | N.A. | 0 |
| BIRC2      | 0,365893314 | 0,451371462 | 0 | N.A. | 0 |
| ITSN1      | 0,365723902 | 0,653301177 | 0 | N.A. | 0 |
| MFSD4      | 0,365349714 | 0,365910307 | 0 | N.A. | 0 |
| TFE3       | 0,365299756 | 0,359363627 | 0 | N.A. | 0 |
| SEC24D     | 0,365295243 | 0,326943939 | 0 | N.A. | 0 |
| ARHGAP17   | 0,365242646 | 0,376224326 | 0 | N.A. | 0 |
| GSKIP      | 0,365063645 | 0,30133275  | 0 | N.A. | 0 |
| VPS4B      | 0,364978079 | 0,346748268 | 0 | N.A. | 0 |
| ATG9B      | 0,364780791 | 0,247893821 | 0 | N.A. | 0 |
| FAM83G     | 0,364735842 | 0,290728093 | 0 | N.A. | 0 |
| STYK1      | 0,364602185 | 0,623836804 | 0 | N.A. | 0 |
| MAP4K4     | 0,364241595 | 0,388178642 | 0 | N.A. | 0 |
| ANO8       | 0,364064366 | 0,255381814 | 0 | N.A. | 0 |
| NRP2       | 0,363890139 | 0,455950609 | 0 | N.A. | 0 |
| RIMKLA     | 0,36384034  | 0,024933116 | 0 | N.A. | 0 |
| TMPRSS3    | 0,363396914 | 0,387106147 | 0 | N.A. | 0 |
| SLC25A25   | 0,363265421 | 0,52020148  | 1 | cl1  | 0 |
| SEMA3B-AS1 | 0,363264006 | 0,128632358 | 0 | N.A. | 0 |
| KIAA1191   | 0,363194582 | 0,364173357 | 0 | N.A. | 0 |



|          |             |              |   |      |   |
|----------|-------------|--------------|---|------|---|
| RDH10    | 0,363191939 | 0,490418133  | 0 | N.A. | 0 |
| AMFR     | 0,363106836 | 0,444120966  | 0 | N.A. | 0 |
| PHYKPL   | 0,36309708  | 0,47860703   | 0 | N.A. | 0 |
| SPINK7   | 0,363054574 |              | 0 | N.A. | 0 |
| AQP12A   | 0,363047629 | -0,005496908 | 0 | N.A. | 0 |
| LY75     | 0,363045325 | 0,619820304  | 0 | N.A. | 0 |
| IRS1     | 0,362993297 | 0,465528665  | 0 | N.A. | 0 |
| ATG2A    | 0,362954273 | 0,280446128  | 0 | N.A. | 0 |
| TRAM1    | 0,362893171 | 0,698566255  | 0 | N.A. | 0 |
| PADI1    | 0,362341216 | 0,086935548  | 0 | N.A. | 0 |
| ATP13A2  | 0,362115442 | 0,684973252  | 0 | N.A. | 0 |
| C1orf210 | 0,361943738 | 0,299121337  | 0 | N.A. | 0 |
| MAF      | 0,361914951 | -0,036257154 | 0 | N.A. | 0 |
| TOR1B    | 0,361816973 | 0,403886525  | 0 | N.A. | 0 |
| HIST1H3E | 0,361531687 | 0,316233546  | 0 | N.A. | 0 |
| MUC3A    | 0,361171689 | 0,286140782  | 0 | N.A. | 0 |
| SLC39A14 | 0,36101275  | 0,524462209  | 0 | N.A. | 0 |
| VAPA     | 0,360640314 | 0,272450021  | 0 | N.A. | 0 |
| AQP7     | 0,360502973 | 0,276222106  | 0 | N.A. | 0 |
| SETD9    | 0,360433113 | 0,028995128  | 0 | N.A. | 0 |
| DYRK2    | 0,360229614 | 0,673033634  | 0 | N.A. | 0 |
| PADI2    | 0,360189268 | 0,218776286  | 0 | N.A. | 0 |
| PPARA    | 0,360071605 | 0,241014152  | 0 | N.A. | 0 |
| CA13     | 0,359717834 | 0,308099904  | 0 | N.A. | 0 |
| IFI6     | 0,359654556 | 0,593684128  | 0 | N.A. | 0 |
| UFM1     | 0,359653039 | 0,330639009  | 0 | N.A. | 0 |
| STK10    | 0,359556384 | -0,239516452 | 0 | N.A. | 0 |
| HLA-G    | 0,359517577 | 0,481679269  | 0 | N.A. | 0 |
| C6orf223 | 0,359470623 | 0,466094206  | 0 | N.A. | 0 |
| MAGT1    | 0,359460091 | 0,232587644  | 0 | N.A. | 0 |
| MARK4    | 0,35942809  | -0,003767225 | 0 | N.A. | 0 |
| NCEH1    | 0,359213638 | 0,532931418  | 0 | N.A. | 0 |
| NR2C2    | 0,359070621 | 0,170882912  | 0 | N.A. | 0 |

|             |             |              |   |      |   |
|-------------|-------------|--------------|---|------|---|
| NFIL3       | 0,358530023 | 0,429610309  | 0 | N.A. | 0 |
| RP11-7K24.3 | 0,358425498 | 0,327701322  | 0 | N.A. | 0 |
| VPS18       | 0,358391933 | 0,296694896  | 0 | N.A. | 0 |
| GLS         | 0,358385214 | 0,60715853   | 0 | N.A. | 0 |
| WWC1        | 0,358384653 | 0,583774956  | 0 | N.A. | 0 |
| P2RX4       | 0,358068087 | 0,513043631  | 0 | N.A. | 0 |
| SBF2        | 0,357923865 | 0,15853171   | 0 | N.A. | 0 |
| CLIP2       | 0,357633892 | 0,389409304  | 0 | N.A. | 0 |
| RAB6A       | 0,357412338 | 0,308244497  | 0 | N.A. | 0 |
| COG3        | 0,357307203 | 0,306395344  | 0 | N.A. | 0 |
| CTSO        | 0,357268174 | 0,183749209  | 0 | N.A. | 0 |
| NEURL3      | 0,357150883 | 0,378213542  | 0 | N.A. | 0 |
| TESK1       | 0,357099525 | 0,298403376  | 0 | N.A. | 0 |
| TMF1        | 0,357067921 | 0,365326119  | 0 | N.A. | 0 |
| C1QL1       | 0,356790286 | 0,132655245  | 0 | N.A. | 0 |
| MMP1        | 0,356743523 | 0,34036294   | 0 | N.A. | 0 |
| CAMK2D      | 0,35674338  | 0,243214964  | 0 | N.A. | 0 |
| MOGAT3      | 0,356651291 | 0,482585167  | 0 | N.A. | 0 |
| C1orf115    | 0,356601456 | 0,269701716  | 0 | N.A. | 0 |
| MAFG        | 0,356336811 | 0,402793971  | 0 | N.A. | 0 |
| INAFM1      | 0,35625219  | -0,115238508 | 0 | N.A. | 0 |
| MICAL3      | 0,356158534 | 0,388814481  | 0 | N.A. | 0 |
| RP11-350J20 | 0,356154514 | 0,339680368  | 0 | N.A. | 0 |
| BAIAP2L2    | 0,355624247 | 0,349488827  | 0 | N.A. | 0 |
| MROH1       | 0,35560266  | 0,415843874  | 0 | N.A. | 0 |
| C1orf167    | 0,35545408  | 0,381000921  | 0 | N.A. | 0 |
| RCAN1       | 0,355424343 | 0,229377266  | 0 | N.A. | 0 |
| SLCO2B1     | 0,355282759 | 0,076448083  | 0 | N.A. | 0 |
| PWWP2B      | 0,355145701 | 0,181684002  | 0 | N.A. | 0 |
| PDZD3       | 0,355046905 | 0,232419287  | 0 | N.A. | 0 |
| OCEL1       | 0,354983331 | 0,2430284    | 0 | N.A. | 0 |
| ITPRIPL2    | 0,354905001 | 0,397145727  | 0 | N.A. | 0 |
| LPAR5       | 0,354879908 | 0,612894478  | 0 | N.A. | 0 |

|             |             |              |   |      |   |
|-------------|-------------|--------------|---|------|---|
| MBD2        | 0,35477965  | 0,469956259  | 0 | N.A. | 0 |
| TFAP2C      | 0,35468601  | 0,459609238  | 0 | N.A. | 0 |
| LINC01207   | 0,354377796 | 0,424185081  | 0 | N.A. | 0 |
| ULK1        | 0,354337735 | 0,486752932  | 0 | N.A. | 0 |
| SERPINB7    | 0,353920847 | 0,127840344  | 0 | N.A. | 0 |
| SYTL2       | 0,353757708 | 0,437626849  | 0 | N.A. | 0 |
| TMSB4X      | 0,35330644  | 0,036353208  | 0 | N.A. | 0 |
| SLC25A24    | 0,353285333 | 0,435102655  | 0 | N.A. | 0 |
| MOSPD2      | 0,353027187 | 0,303824749  | 0 | N.A. | 0 |
| ZHX2        | 0,353001366 | 0,362211519  | 0 | N.A. | 0 |
| ARHGEF5     | 0,352965293 | 0,285845579  | 0 | N.A. | 0 |
| CSNK1E      | 0,35295457  | 0,473297266  | 0 | N.A. | 0 |
| SAMD4B      | 0,352787242 | 0,163812324  | 0 | N.A. | 0 |
| TM4SF20     | 0,35270175  | 0,290484974  | 0 | N.A. | 0 |
| USP25       | 0,352694709 | 0,330389332  | 0 | N.A. | 0 |
| NOSTRIN     | 0,352674839 | 0,262916001  | 0 | N.A. | 0 |
| TM2D1       | 0,352654436 | 0,321200532  | 0 | N.A. | 0 |
| SIRT6       | 0,352570633 | 0,425684393  | 0 | N.A. | 0 |
| AMIGO2      | 0,35248359  | 0,655916694  | 0 | N.A. | 0 |
| C4orf32     | 0,352430634 | 0,335039337  | 0 | N.A. | 0 |
| CD97        | 0,351924459 | 0,290866845  | 0 | N.A. | 0 |
| SULT1C2     | 0,351822931 | 0,342154519  | 0 | N.A. | 0 |
| MAP4K3      | 0,351524369 | 0,316072834  | 0 | N.A. | 0 |
| AAK1        | 0,351436246 | 0,41935799   | 0 | N.A. | 0 |
| TMEM189     | 0,351398891 | 0,51952837   | 0 | N.A. | 0 |
| URGCP       | 0,351391641 | 0,247738736  | 0 | N.A. | 0 |
| NUDT4       | 0,35107542  | 0,20826162   | 0 | N.A. | 0 |
| RNF19A      | 0,35102743  | 0,493259884  | 0 | N.A. | 0 |
| CPA4        | 0,35089747  | 0,058643342  | 0 | N.A. | 0 |
| LGALS9      | 0,350692753 | 0,26582631   | 0 | N.A. | 0 |
| ANXA3       | 0,350516956 | 0,561932943  | 1 | none | 0 |
| KRT34       | 0,35043105  | 0,333407989  | 0 | N.A. | 0 |
| B4GALT1-AS1 | 0,350366423 | -0,143701085 | 0 | N.A. | 0 |

|              |                    |                    |          |             |   |
|--------------|--------------------|--------------------|----------|-------------|---|
| CHIC2        | 0,350140636        | 0,090931566        | 0        | N.A.        | 0 |
| ADAM19       | 0,350091739        | 0,43762415         | 0        | N.A.        | 0 |
| SLC22A18AS   | 0,350022779        | 0,307473521        | 0        | N.A.        | 0 |
| KIAA1161     | 0,349812637        | 0,175366749        | 0        | N.A.        | 0 |
| IGFBP3       | 0,349740177        | 0,47170004         | 0        | N.A.        | 0 |
| RASSF6       | 0,349684063        | 0,749791798        | 0        | N.A.        | 0 |
| DPH3         | 0,349647598        | 0,157087232        | 0        | N.A.        | 0 |
| OSBPL3       | 0,349584447        | 0,534776966        | 0        | N.A.        | 0 |
| ACOT11       | 0,349510405        | 0,494632478        | 0        | N.A.        | 0 |
| GLRX         | 0,349318301        | 0,345353524        | 0        | N.A.        | 0 |
| RP11-468E2.  | 0,349229533        | 0,192334686        | 0        | N.A.        | 0 |
| TTC7A        | 0,349143573        | 0,501044555        | 0        | N.A.        | 0 |
| TFPI         | 0,349133354        | 0,577929649        | 0        | N.A.        | 0 |
| WASF2        | 0,349074133        | 0,400862795        | 0        | N.A.        | 0 |
| FZD5         | 0,349024231        | 0,395353206        | 0        | N.A.        | 0 |
| STK17A       | 0,348773572        | 0,174717021        | 0        | N.A.        | 0 |
| TACC2        | 0,348679008        | 0,457485717        | 0        | N.A.        | 0 |
| CACNA1C      | 0,348598129        | 0,284907941        | 0        | N.A.        | 0 |
| RABIF        | 0,348529548        | 0,376068286        | 0        | N.A.        | 0 |
| AL049794.1   | 0,348523078        | 0,05444932         | 0        | N.A.        | 0 |
| <b>KRT6A</b> | <b>0,348487892</b> | <b>0,538086096</b> | <b>1</b> | <b>cls3</b> | 0 |
| FAM13A       | 0,348451679        | 0,252953355        | 0        | N.A.        | 0 |
| ZMYM2        | 0,348219638        | 0,457538           | 0        | N.A.        | 0 |
| AES          | 0,348123916        | 0,621200594        | 0        | N.A.        | 0 |
| HYI          | 0,348110818        | 0,4784884          | 0        | N.A.        | 0 |
| PLXNA1       | 0,347920283        | 0,462153662        | 0        | N.A.        | 0 |
| C15orf52     | 0,347685557        | 0,580260434        | 0        | N.A.        | 0 |
| RALB         | 0,347673269        | 0,284165469        | 0        | N.A.        | 0 |
| VPS9D1       | 0,347604833        | 0,380528718        | 0        | N.A.        | 0 |
| WBP1L        | 0,34746768         | 0,147683121        | 0        | N.A.        | 0 |
| SH3BP2       | 0,347466101        | 0,455393009        | 0        | N.A.        | 0 |
| ABLIM3       | 0,347263479        | 0,391458099        | 0        | N.A.        | 0 |
| DAPK3        | 0,347215162        | 0,441081601        | 0        | N.A.        | 0 |

|            |             |              |   |      |   |
|------------|-------------|--------------|---|------|---|
| AHDC1      | 0,347019785 | 0,213749683  | 0 | N.A. | 0 |
| WWP1       | 0,346823878 | 0,200771875  | 0 | N.A. | 0 |
| UBXN6      | 0,346541249 | 0,155773374  | 0 | N.A. | 0 |
| RAB11FIP1  | 0,346508927 | 0,717692479  | 0 | N.A. | 0 |
| SLC22A3    | 0,346488309 | 0,236615501  | 0 | N.A. | 0 |
| NWD2       | 0,34633786  | 0,332741647  | 0 | N.A. | 0 |
| LINC01186  | 0,346296259 | -0,168920298 | 0 | N.A. | 0 |
| RAB9A      | 0,346149388 | 0,499068405  | 0 | N.A. | 0 |
| BAMBI      | 0,346038727 | 0,547467368  | 0 | N.A. | 0 |
| EFNA1      | 0,346011288 | 0,650839695  | 0 | N.A. | 0 |
| TPBG       | 0,345872042 | 0,483318033  | 0 | N.A. | 0 |
| MSX2       | 0,345840597 | 0,406456637  | 0 | N.A. | 0 |
| AP001187.9 | 0,345817102 | 0,388823795  | 0 | N.A. | 0 |
| MGAT4B     | 0,34575761  | 0,557264507  | 0 | N.A. | 0 |
| ZNF217     | 0,345686309 | 0,42099042   | 0 | N.A. | 0 |
| VWA1       | 0,345621949 | 0,701508787  | 0 | N.A. | 0 |
| STX12      | 0,345608236 | 0,148723158  | 0 | N.A. | 0 |
| CLDN9      | 0,345466053 | 0,177740044  | 0 | N.A. | 0 |
| RBM47      | 0,345334337 | 0,364040069  | 0 | N.A. | 0 |
| PPFIA1     | 0,345322265 | 0,42127171   | 0 | N.A. | 0 |
| GENE       | 0,345304035 | 0,354675845  | 0 | N.A. | 0 |
| GNA15      | 0,345246823 | 0,210515204  | 0 | N.A. | 0 |
| TOM1       | 0,345119195 | 0,377825461  | 0 | N.A. | 0 |
| BTBD6      | 0,34497048  | 0,071998034  | 0 | N.A. | 0 |
| MAST2      | 0,344685592 | 0,396521845  | 0 | N.A. | 0 |
| SH3BGRL2   | 0,344581995 | 0,405727416  | 0 | N.A. | 0 |
| MX1        | 0,34457932  | 0,517222636  | 0 | N.A. | 0 |
| RAET1G     | 0,344529744 | 0,462049016  | 0 | N.A. | 0 |
| MTM1       | 0,344441846 | -0,026491928 | 0 | N.A. | 0 |
| SMCHD1     | 0,344323601 | 0,149650785  | 0 | N.A. | 0 |
| TPMT       | 0,344178908 | 0,265078899  | 0 | N.A. | 0 |
| MTHFR      | 0,344130219 | 0,296304469  | 0 | N.A. | 0 |
| LEPROT     | 0,343994043 | 0,418895458  | 0 | N.A. | 0 |

|           |             |              |   |      |   |
|-----------|-------------|--------------|---|------|---|
| PLAU      | 0,343977256 | 0,449578904  | 0 | N.A. | 0 |
| NDFIP2    | 0,343721296 | 0,606821907  | 0 | N.A. | 0 |
| LAMC1     | 0,34355493  | 0,167023879  | 0 | N.A. | 0 |
| CNNM4     | 0,34338014  | 0,420918656  | 0 | N.A. | 0 |
| CARD6     | 0,343126485 | 0,464193752  | 0 | N.A. | 0 |
| XRN1      | 0,34308529  | 0,186917826  | 0 | N.A. | 0 |
| CLCN3     | 0,343027911 | 0,424136839  | 0 | N.A. | 0 |
| SLC38A2   | 0,34292639  | 0,291459291  | 0 | N.A. | 0 |
| KLF11     | 0,34291257  | -0,043118487 | 0 | N.A. | 0 |
| SWAP70    | 0,342630317 | 0,389706783  | 0 | N.A. | 0 |
| RASA2     | 0,342474087 | 0,356204024  | 0 | N.A. | 0 |
| TNFRSF10D | 0,342415489 | 0,143889817  | 0 | N.A. | 0 |
| PITX1     | 0,342405234 | 0,437626145  | 0 | N.A. | 0 |
| C11orf68  | 0,342250282 | -0,144749122 | 0 | N.A. | 0 |
| EID3      | 0,342112702 | 0,030472725  | 0 | N.A. | 0 |
| ARRDC2    | 0,342081601 | 0,148046341  | 0 | N.A. | 0 |
| PODXL     | 0,34207703  | 0,492536769  | 0 | N.A. | 0 |
| DVL1      | 0,34199707  | 0,443206885  | 0 | N.A. | 0 |
| ARHGAP1   | 0,341994241 | 0,378906752  | 0 | N.A. | 0 |
| KPNA4     | 0,341989712 | 0,285366475  | 0 | N.A. | 0 |
| INSC      | 0,341872611 |              | 0 | N.A. | 0 |
| CASK      | 0,341621418 | 0,184701409  | 0 | N.A. | 0 |
| AGFG1     | 0,341606524 | 0,48756273   | 0 | N.A. | 0 |
| KMT2C     | 0,341355912 | 0,495711055  | 0 | N.A. | 0 |
| DDAH2     | 0,341022745 | 0,323756776  | 0 | N.A. | 0 |
| BCAR3     | 0,340951817 | 0,209332751  | 0 | N.A. | 0 |
| LTBP4     | 0,340871198 | 0,442772616  | 0 | N.A. | 0 |
| OTUD7B    | 0,340788475 | 0,369782931  | 0 | N.A. | 0 |
| PAK2      | 0,340686752 | 0,189832545  | 0 | N.A. | 0 |
| CD47      | 0,340650376 | 0,463712138  | 0 | N.A. | 0 |
| PLEKHA7   | 0,340513856 | 0,548432315  | 0 | N.A. | 0 |
| PARP4     | 0,340494326 | 0,331605016  | 0 | N.A. | 0 |
| ATP11A    | 0,339895491 | 0,515019461  | 0 | N.A. | 0 |

|              |             |              |   |      |   |
|--------------|-------------|--------------|---|------|---|
| TSPAN31      | 0,339767695 | 0,361911599  | 0 | N.A. | 0 |
| GUCD1        | 0,339330202 | 0,364964433  | 0 | N.A. | 0 |
| C6orf222     | 0,339133022 | 0,296623188  | 0 | N.A. | 0 |
| MAP2K2       | 0,339102455 | 0,465012973  | 0 | N.A. | 0 |
| TOLLIP       | 0,33883029  | 0,480037927  | 0 | N.A. | 0 |
| C6orf106     | 0,338492427 | 0,172732508  | 0 | N.A. | 0 |
| SLC9A8       | 0,338325746 | 0,128752326  | 0 | N.A. | 0 |
| SGK223       | 0,338311431 | 0,51135067   | 0 | N.A. | 0 |
| STARD4       | 0,33828559  | 0,138473154  | 0 | N.A. | 0 |
| FAM101A      | 0,337963709 | 0,57913217   | 0 | N.A. | 0 |
| NR3C2        | 0,337896825 | 0,160256089  | 0 | N.A. | 0 |
| LYNX1        | 0,337817828 | -0,105868007 | 0 | N.A. | 0 |
| KCTD1        | 0,337762199 | 0,370965774  | 0 | N.A. | 0 |
| DNMBP        | 0,337305996 | 0,245675335  | 0 | N.A. | 0 |
| C15orf48     | 0,337236527 | 0,534193014  | 0 | N.A. | 0 |
| ERBB3        | 0,337226819 | 0,553613626  | 0 | N.A. | 0 |
| TLCD2        | 0,336937281 | 0,472097963  | 0 | N.A. | 0 |
| ST3GAL4      | 0,336664809 | 0,475226666  | 0 | N.A. | 0 |
| RP11-553L6.1 | 0,336656504 | 0,567639935  | 0 | N.A. | 0 |
| NR1D2        | 0,336641108 | 0,329791859  | 0 | N.A. | 0 |
| DNAJB9       | 0,336600628 | 0,348737141  | 0 | N.A. | 0 |
| RHOG         | 0,336436236 | 0,274038753  | 0 | N.A. | 0 |
| OSTM1        | 0,336223097 | 0,144837603  | 0 | N.A. | 0 |
| KLF13        | 0,335975247 | 0,310803512  | 0 | N.A. | 0 |
| ARAP2        | 0,335922924 | 0,224948242  | 0 | N.A. | 0 |
| S100A4       | 0,335713871 | -0,095468774 | 0 | N.A. | 0 |
| MRVI1-AS1    | 0,335485765 | -0,078773465 | 0 | N.A. | 0 |
| HIPK3        | 0,335449154 | 0,073880593  | 0 | N.A. | 0 |
| ERLEC1       | 0,335333245 | 0,356667766  | 0 | N.A. | 0 |
| ACBD3        | 0,335116758 | 0,577872231  | 0 | N.A. | 0 |
| A4GALT       | 0,335004228 | 0,36988541   | 0 | N.A. | 0 |
| TRIM69       | 0,335000765 | 0,01837874   | 0 | N.A. | 0 |
| CYSRT1       | 0,334803962 | 0,395091067  | 0 | N.A. | 0 |

|              |                   |                    |          |            |   |
|--------------|-------------------|--------------------|----------|------------|---|
| PAQR8        | 0,334770852       | 0,220388949        | 0        | N.A.       | 0 |
| TBC1D1       | 0,33469505        | 0,164149673        | 0        | N.A.       | 0 |
| KIF1C        | 0,33437169        | 0,263666578        | 0        | N.A.       | 0 |
| GPR126       | 0,334127082       | 0,508106225        | 0        | N.A.       | 0 |
| SCYL2        | 0,334044206       | 0,302461186        | 0        | N.A.       | 0 |
| STK3         | 0,333972923       | 0,256060475        | 0        | N.A.       | 0 |
| HDAC5        | 0,333905352       | 0,363248897        | 0        | N.A.       | 0 |
| CBLB         | 0,333668561       | 0,558071197        | 0        | N.A.       | 0 |
| TMEM136      | 0,333591378       | 0,022539653        | 0        | N.A.       | 0 |
| ZC3HAV1      | 0,333525037       | 0,228341881        | 0        | N.A.       | 0 |
| PTAFR        | 0,33344322        | 0,380188377        | 0        | N.A.       | 0 |
| TPO          | 0,333358152       | 0,205669107        | 0        | N.A.       | 0 |
| YPEL5        | 0,333328528       | 0,374753243        | 0        | N.A.       | 0 |
| HSPB8        | 0,333062487       | 0,226841782        | 0        | N.A.       | 0 |
| CAV1         | 0,333017431       | 0,000136606        | 0        | N.A.       | 0 |
| IL6R         | 0,332987649       | 0,19587787         | 0        | N.A.       | 0 |
| CLDN1        | 0,332738895       | 0,53055288         | 0        | N.A.       | 0 |
| <b>EXOC7</b> | <b>0,33272556</b> | <b>0,353234379</b> | <b>1</b> | <b>cl1</b> | 0 |
| CPNE8        | 0,332692384       | 0,426883083        | 0        | N.A.       | 0 |
| AVL9         | 0,332518595       | 0,340337365        | 0        | N.A.       | 0 |
| ZBTB34       | 0,332477837       | 0,251315079        | 0        | N.A.       | 0 |
| CCNG2        | 0,332420751       | 0,512435643        | 0        | N.A.       | 0 |
| GPR87        | 0,332369568       | 0,260654866        | 0        | N.A.       | 0 |
| ADAM17       | 0,331861321       | 0,429865957        | 0        | N.A.       | 0 |
| UBA6         | 0,331785897       | 0,409444946        | 0        | N.A.       | 0 |
| TPRG1L       | 0,33158918        | 0,575609195        | 0        | N.A.       | 0 |
| TRIP12       | 0,331556631       | 0,342480522        | 0        | N.A.       | 0 |
| AVP1         | 0,331534791       | 0,440564234        | 0        | N.A.       | 0 |
| SEC61A1      | 0,331464857       | 0,530299117        | 0        | N.A.       | 0 |
| SPSB1        | 0,331462811       | 0,189809186        | 0        | N.A.       | 0 |
| OSBPL2       | 0,331257362       | 0,390738928        | 0        | N.A.       | 0 |
| ACVR2A       | 0,331116618       | 0,280503942        | 0        | N.A.       | 0 |
| CD109        | 0,33109085        | 0,521307369        | 0        | N.A.       | 0 |



|           |             |             |   |      |   |
|-----------|-------------|-------------|---|------|---|
| OSBP2     | 0,331031619 | 0,238802249 | 0 | N.A. | 0 |
| IGSF9     | 0,330826273 | 0,328894148 | 0 | N.A. | 0 |
| SEMA5A    | 0,330396595 | 0,50963557  | 0 | N.A. | 0 |
| IGFBP1    | 0,329853704 | 0,279647257 | 0 | N.A. | 0 |
| ETV3      | 0,329835936 | 0,402274055 | 0 | N.A. | 0 |
| RNF145    | 0,329777253 | 0,538773222 | 0 | N.A. | 0 |
| GAREM     | 0,329710373 | 0,412864604 | 0 | N.A. | 0 |
| GPR108    | 0,329468556 | 0,598974353 | 0 | N.A. | 0 |
| SERINC5   | 0,329447205 | 0,337445016 | 0 | N.A. | 0 |
| TSC22D2   | 0,329422732 | 0,513943715 | 0 | N.A. | 0 |
| LGI4      | 0,329381279 | 0,129405168 | 0 | N.A. | 0 |
| LURAP1L   | 0,329246952 | 0,57480293  | 0 | N.A. | 0 |
| DTX3L     | 0,329224085 | 0,33985303  | 0 | N.A. | 0 |
| TRIM8     | 0,329223978 | 0,440074788 | 0 | N.A. | 0 |
| SAA1      | 0,329175334 | 0,490887892 | 0 | N.A. | 0 |
| INPP1     | 0,329117443 | 0,500462328 | 0 | N.A. | 0 |
| MBOAT7    | 0,328933141 | 0,802031279 | 0 | N.A. | 0 |
| RNF11     | 0,328895449 | 0,033490512 | 0 | N.A. | 0 |
| YIPF3     | 0,328858628 | 0,215697545 | 0 | N.A. | 0 |
| CST6      | 0,328104392 | 0,415487183 | 0 | N.A. | 0 |
| MIEF2     | 0,327947874 | 0,238763979 | 0 | N.A. | 0 |
| TMEM54    | 0,327943472 | 0,545863423 | 0 | N.A. | 0 |
| SLC16A4   | 0,327929592 | 0,683112033 | 0 | N.A. | 0 |
| RXRA      | 0,327922095 | 0,487559415 | 0 | N.A. | 0 |
| HIST1H2BC | 0,327853711 | 0,179673902 | 0 | N.A. | 0 |
| KIAA0430  | 0,327799122 | 0,192935705 | 0 | N.A. | 0 |
| COL6A1    | 0,327704166 | 0,517562138 | 0 | N.A. | 0 |
| TNNT1     | 0,327626824 | 0,257522836 | 0 | N.A. | 0 |
| PLEKHG1   | 0,327594619 | 0,41034591  | 0 | N.A. | 0 |
| SLC15A1   | 0,3275894   | 0,258149125 | 0 | N.A. | 0 |
| HECTD1    | 0,327519905 | 0,442362453 | 0 | N.A. | 0 |
| LNX2      | 0,327399727 | 0,322578013 | 0 | N.A. | 0 |
| ALDOB     | 0,327241719 | 0,208833523 | 0 | N.A. | 0 |

|           |             |             |   |      |   |
|-----------|-------------|-------------|---|------|---|
| LMTK2     | 0,327137101 | 0,319841019 | 0 | N.A. | 0 |
| BACH2     | 0,327125193 | 0,081896759 | 0 | N.A. | 0 |
| GSDMB     | 0,327108577 | 0,526039724 | 0 | N.A. | 0 |
| ITM2C     | 0,32683598  | 0,142042309 | 0 | N.A. | 0 |
| PTPRJ     | 0,326434108 | 0,40072298  | 0 | N.A. | 0 |
| LCN2      | 0,326410369 | 0,556533537 | 0 | N.A. | 0 |
| UNC5B-AS1 | 0,32625761  | 0,334499941 | 0 | N.A. | 0 |
| LTBP1     | 0,326193043 | 0,43238806  | 0 | N.A. | 0 |
| STAT2     | 0,326156458 | 0,296576629 | 0 | N.A. | 0 |
| EPB41L4B  | 0,326077044 | 0,434349019 | 0 | N.A. | 0 |
| PLEKHB2   | 0,325988691 | 0,438091325 | 0 | N.A. | 0 |
| CLCA4     | 0,325823454 | 0,283282281 | 0 | N.A. | 0 |
| FAM25A    | 0,325643427 | 0,411561251 | 0 | N.A. | 0 |
| SLC25A29  | 0,325347918 | 0,311982633 | 0 | N.A. | 0 |
| SMAD2     | 0,325324419 | 0,294497266 | 0 | N.A. | 0 |
| MICA      | 0,325250825 | 0,485113834 | 0 | N.A. | 0 |
| TEP1      | 0,32522097  | 0,300160514 | 0 | N.A. | 0 |
| MBD6      | 0,325192206 | 0,262650532 | 0 | N.A. | 0 |
| FNIP1     | 0,325161817 | 0,490881442 | 0 | N.A. | 0 |
| TCP11L2   | 0,32507166  | 0,278456243 | 0 | N.A. | 0 |
| RAC1      | 0,324943801 | 0,390109318 | 0 | N.A. | 0 |
| EVA1B     | 0,324942219 | 0,459981239 | 0 | N.A. | 0 |
| MYO1D     | 0,324796376 | 0,503121782 | 0 | N.A. | 0 |
| ACSS2     | 0,324732976 | 0,535036508 | 0 | N.A. | 0 |
| PPP1R12C  | 0,324697865 | 0,258519177 | 0 | N.A. | 0 |
| ATG13     | 0,324368904 | 0,228250583 | 0 | N.A. | 0 |
| PTPN3     | 0,324089586 | 0,454820092 | 0 | N.A. | 0 |
| MGAT3     | 0,324010356 | 0,417698874 | 0 | N.A. | 0 |
| ACE2      | 0,323998851 | 0,025255828 | 0 | N.A. | 0 |
| HGS       | 0,323981376 | 0,428940552 | 0 | N.A. | 0 |
| CBX4      | 0,323228853 | 0,404533652 | 0 | N.A. | 0 |
| SGPL1     | 0,323140309 | 0,602441832 | 0 | N.A. | 0 |
| TNFSF10   | 0,323127808 | 0,306189798 | 0 | N.A. | 0 |

|              |             |              |   |      |   |
|--------------|-------------|--------------|---|------|---|
| GFER         | 0,322905066 | 0,231733875  | 0 | N.A. | 0 |
| CHMP1B       | 0,322810654 | 0,195332819  | 0 | N.A. | 0 |
| SLURP1       | 0,322701906 |              | 0 | N.A. | 0 |
| RP11-465N4.  | 0,322645867 | 0,283906071  | 0 | N.A. | 0 |
| PIWIL4       | 0,322565168 | 0,21814187   | 0 | N.A. | 0 |
| CYB5R3       | 0,322525607 | 0,502487805  | 0 | N.A. | 0 |
| AC005550.3   | 0,322446788 | 0,248235821  | 0 | N.A. | 0 |
| CH507-42P1   | 0,322334278 | 0,396160599  | 0 | N.A. | 0 |
| SPRR2A       | 0,322210615 | 0,242306563  | 0 | N.A. | 0 |
| CMPK2        | 0,322118896 | 0,328194118  | 0 | N.A. | 0 |
| ABLIM1       | 0,321808867 | 0,261441145  | 0 | N.A. | 0 |
| DAB2IP       | 0,321566013 | 0,276171609  | 0 | N.A. | 0 |
| ITSN2        | 0,321526498 | 0,369341084  | 0 | N.A. | 0 |
| MGRN1        | 0,321488374 | 0,586856582  | 0 | N.A. | 0 |
| AC093609.1   | 0,321405457 | 0,0294406    | 0 | N.A. | 0 |
| RP11-446N19  | 0,32130569  | -0,256444694 | 0 | N.A. | 0 |
| DIAPH2-AS1   | 0,321203394 | 0,326430694  | 0 | N.A. | 0 |
| RBCK1        | 0,321061084 | 0,467758552  | 0 | N.A. | 0 |
| B3GNT2       | 0,321037665 | 0,438222022  | 0 | N.A. | 0 |
| RP11-50I19.2 | 0,32049429  | 0,253866768  | 0 | N.A. | 0 |
| MSL1         | 0,320330785 | 0,2800661    | 0 | N.A. | 0 |
| ZSWIM8       | 0,320194493 | 0,361321088  | 0 | N.A. | 0 |
| CASP5        | 0,320191848 | 0,281992092  | 0 | N.A. | 0 |
| ZZEF1        | 0,319975231 | 0,113299031  | 0 | N.A. | 0 |
| HSH2D        | 0,319957717 | 0,213655323  | 0 | N.A. | 0 |
| ANKRD12      | 0,31988124  | 0,295673729  | 0 | N.A. | 0 |
| IL3RA        | 0,319793997 | 0,184730571  | 0 | N.A. | 0 |
| HERPUD2      | 0,319629421 | 0,283852926  | 0 | N.A. | 0 |
| MFSD5        | 0,319530312 | 0,289886634  | 0 | N.A. | 0 |
| STAM2        | 0,319508385 | -0,031765104 | 0 | N.A. | 0 |
| AGPAT4       | 0,319471596 | 0,024105768  | 0 | N.A. | 0 |
| FAM84A       | 0,319328846 | 0,191629794  | 0 | N.A. | 0 |
| MPP5         | 0,319315352 | 0,437393152  | 0 | N.A. | 0 |

|             |             |              |   |      |   |
|-------------|-------------|--------------|---|------|---|
| RP11-283G6. | 0,319283856 |              | 0 | N.A. | 0 |
| DUSP16      | 0,319262676 | -0,008333691 | 0 | N.A. | 0 |
| UACA        | 0,319175487 | 0,504089766  | 0 | N.A. | 0 |
| EP300       | 0,318915425 | 0,497094121  | 0 | N.A. | 0 |
| RP11-492E3. | 0,318864501 | 0,170420163  | 0 | N.A. | 0 |
| RGCC        | 0,318691119 | 0,017885332  | 0 | N.A. | 0 |
| TMEM176A    | 0,318409927 | 0,355691459  | 0 | N.A. | 0 |
| RP2         | 0,318398801 | -0,139288471 | 0 | N.A. | 0 |
| ELL         | 0,318377512 | 0,269897043  | 0 | N.A. | 0 |
| TMEM2       | 0,318369124 | 0,47012629   | 0 | N.A. | 0 |
| ITCH        | 0,318355207 | 0,293828596  | 0 | N.A. | 0 |
| MARCH2      | 0,318312039 | 0,259456368  | 0 | N.A. | 0 |
| SFXN3       | 0,318230301 | 0,683812123  | 0 | N.A. | 0 |
| DOT1L       | 0,318144146 | 0,233587335  | 0 | N.A. | 0 |
| KRT86       | 0,318138234 | 0,246460001  | 0 | N.A. | 0 |
| NATD1       | 0,318039013 | 0,385407044  | 0 | N.A. | 0 |
| KDM6A       | 0,317933532 | 0,219829633  | 0 | N.A. | 0 |
| ARHGAP23    | 0,317902673 | 0,496096778  | 0 | N.A. | 0 |
| BEST1       | 0,317840847 | 0,070766543  | 0 | N.A. | 0 |
| NT5E        | 0,317761426 | 0,598441436  | 0 | N.A. | 0 |
| RAB5A       | 0,317711898 | 0,173606108  | 0 | N.A. | 0 |
| TM4SF1-AS1  | 0,317687729 | 0,107987945  | 0 | N.A. | 0 |
| PNMA2       | 0,317660563 | 0,282091343  | 0 | N.A. | 0 |
| ZSWIM6      | 0,317505199 | 0,314121408  | 0 | N.A. | 0 |
| ZNF83       | 0,317459988 | 0,65424049   | 0 | N.A. | 0 |
| EHD2        | 0,317180643 | 0,205392827  | 0 | N.A. | 0 |
| CCDC64      | 0,316948733 | 0,234897454  | 0 | N.A. | 0 |
| MXRA5       | 0,316804499 | -0,04998447  | 0 | N.A. | 0 |
| APP         | 0,316773265 | 0,523553369  | 0 | N.A. | 0 |
| EFCAB14     | 0,3164789   | 0,516034431  | 0 | N.A. | 0 |
| SERP1       | 0,316380847 | 0,030860032  | 0 | N.A. | 0 |
| C3          | 0,316235877 | -0,019952396 | 0 | N.A. | 0 |
| STXBP2      | 0,315855432 | 0,441193901  | 0 | N.A. | 0 |

|              |             |              |   |      |   |
|--------------|-------------|--------------|---|------|---|
| DDIT3        | 0,315759883 | 0,466326477  | 0 | N.A. | 0 |
| RP5-1185I7.1 | 0,315486867 | -0,02026259  | 0 | N.A. | 0 |
| TFAP2A       | 0,315458788 | 0,37813432   | 0 | N.A. | 0 |
| UBALD2       | 0,315283924 | 0,447347965  | 0 | N.A. | 0 |
| ALOX5        | 0,315013076 | 0,5240575    | 0 | N.A. | 0 |
| STX3         | 0,314934663 | 0,424819162  | 0 | N.A. | 0 |
| HRCT1        | 0,31481213  | 0,340768871  | 0 | N.A. | 0 |
| GS1-600G8.5  | 0,314708262 | 0,21873662   | 0 | N.A. | 0 |
| NPSR1        | 0,314677736 | 0,434470902  | 0 | N.A. | 0 |
| KLF16        | 0,314627342 | 0,215859172  | 0 | N.A. | 0 |
| ABHD3        | 0,314542176 | 0,614185683  | 0 | N.A. | 0 |
| MED13        | 0,314532357 | 0,477672903  | 0 | N.A. | 0 |
| ZDHHC9       | 0,314222693 | 0,2593489    | 0 | N.A. | 0 |
| APAF1        | 0,314022325 | 0,145245781  | 0 | N.A. | 0 |
| GRHL3        | 0,314009108 | 0,237742598  | 0 | N.A. | 0 |
| SLC7A11      | 0,313740937 | 0,461497753  | 0 | N.A. | 0 |
| RNF149       | 0,313622437 | 0,659934443  | 0 | N.A. | 0 |
| SLC26A3      | 0,313523298 | 0,315628145  | 0 | N.A. | 0 |
| RARA         | 0,313327451 | 0,004447435  | 0 | N.A. | 0 |
| SIPA1L3      | 0,313269285 | 0,290571304  | 0 | N.A. | 0 |
| RP1-276N6.2  | 0,313248899 | -0,102446992 | 0 | N.A. | 0 |
| RP11-400N13  | 0,313090245 | -0,173508713 | 0 | N.A. | 0 |
| GM2A         | 0,312852199 | 0,200421445  | 0 | N.A. | 0 |
| MAPKBP1      | 0,312848361 | 0,154067348  | 0 | N.A. | 0 |
| GLG1         | 0,312500506 | 0,438646643  | 0 | N.A. | 0 |
| STRN3        | 0,312446548 | 0,428879887  | 0 | N.A. | 0 |
| SGK1         | 0,312102186 | 0,1563812    | 0 | N.A. | 0 |
| FBXO34       | 0,31201339  | 0,42025477   | 0 | N.A. | 0 |
| PCSK5        | 0,311963683 | 0,478520636  | 0 | N.A. | 0 |
| TM9SF3       | 0,31185771  | 0,549095644  | 0 | N.A. | 0 |
| C20orf195    | 0,311592637 | -0,111584309 | 0 | N.A. | 0 |
| EGFL7        | 0,31156116  | -0,049794071 | 0 | N.A. | 0 |
| SLC51B       | 0,311487597 | 0,244494418  | 0 | N.A. | 0 |

|              |             |              |   |      |   |
|--------------|-------------|--------------|---|------|---|
| EPN2         | 0,311375811 | 0,121660893  | 0 | N.A. | 0 |
| OPN3         | 0,311197936 | 0,237192689  | 0 | N.A. | 0 |
| LGALS1       | 0,311145883 | -0,268913985 | 0 | N.A. | 0 |
| MARCH8       | 0,310947199 | 0,108535168  | 0 | N.A. | 0 |
| MARCH3       | 0,310879798 | 0,398856979  | 0 | N.A. | 0 |
| CDK19        | 0,310638275 | 0,18793621   | 0 | N.A. | 0 |
| AREG         | 0,310580174 | 0,533149591  | 0 | N.A. | 0 |
| ATP6V1G1     | 0,310491354 | 0,038166723  | 0 | N.A. | 0 |
| NRIP3        | 0,310461637 | 0,272122483  | 0 | N.A. | 0 |
| SCD          | 0,310355557 | 0,443841109  | 0 | N.A. | 0 |
| FKBP1B       | 0,310354217 | 0,314176456  | 0 | N.A. | 0 |
| TMTC2        | 0,310338864 | 0,266793142  | 0 | N.A. | 0 |
| SRD5A3       | 0,310153035 | 0,543849483  | 0 | N.A. | 0 |
| SDCBP        | 0,309994212 | -0,052639716 | 0 | N.A. | 0 |
| CFB          | 0,309720732 | 0,214677026  | 0 | N.A. | 0 |
| RP11-10L12.4 | 0,309684137 | -0,082348116 | 0 | N.A. | 0 |
| TMPRSS11E    | 0,309609836 | 0,366444706  | 0 | N.A. | 0 |
| OVOL1        | 0,309604598 | 0,246254997  | 0 | N.A. | 0 |
| ZBTB38       | 0,309559107 | 0,392320585  | 0 | N.A. | 0 |
| IGSF3        | 0,309501771 | 0,352745745  | 0 | N.A. | 0 |
| SPIRE1       | 0,309406626 | 0,286466439  | 0 | N.A. | 0 |
| AJUBA        | 0,309369522 | 0,414455627  | 0 | N.A. | 0 |
| ITGA5        | 0,309340157 | 0,348476347  | 0 | N.A. | 0 |
| RARRES3      | 0,309334606 | 0,416800036  | 0 | N.A. | 0 |
| RNASSET2     | 0,309099048 | 0,25093918   | 0 | N.A. | 0 |
| SRC          | 0,309095582 | 0,232188034  | 0 | N.A. | 0 |
| SPOPL        | 0,308978619 | 0,013786822  | 0 | N.A. | 0 |
| VAMP4        | 0,308941144 | 0,297632573  | 0 | N.A. | 0 |
| DUSP4        | 0,308916741 | 0,575613145  | 0 | N.A. | 0 |
| LAMTOR3      | 0,308904858 | 0,195830632  | 0 | N.A. | 0 |
| PPDPF        | 0,308855891 | 0,040487044  | 0 | N.A. | 0 |
| SEC14L1      | 0,308828464 | 0,387632135  | 0 | N.A. | 0 |
| SLCO1B3      | 0,30873518  | 0,221540698  | 0 | N.A. | 0 |

|            |             |              |   |      |   |
|------------|-------------|--------------|---|------|---|
| RAB8B      | 0,308633697 | 0,272658824  | 0 | N.A. | 0 |
| KIAA1109   | 0,308287569 | 0,224464914  | 0 | N.A. | 0 |
| FLCN       | 0,308216489 | 0,224510252  | 0 | N.A. | 0 |
| ADAMTSL5   | 0,308122423 | 0,363235996  | 0 | N.A. | 0 |
| CMB9-22P13 | 0,307997784 | 0,068560057  | 0 | N.A. | 0 |
| SCAMP2     | 0,307970557 | 0,451224326  | 0 | N.A. | 0 |
| RBFOX2     | 0,307800904 | 0,40610377   | 0 | N.A. | 0 |
| TRIB3      | 0,307792713 | 0,580709377  | 0 | N.A. | 0 |
| KATNBL1    | 0,307760421 | 0,231049319  | 0 | N.A. | 0 |
| SLC7A5     | 0,307667418 | 0,267218572  | 0 | N.A. | 0 |
| SH3KBP1    | 0,307513445 | 0,39254659   | 0 | N.A. | 0 |
| TMSB10     | 0,307407865 | -0,009856289 | 0 | N.A. | 0 |
| TMEM167B   | 0,307405304 | 0,243181409  | 0 | N.A. | 0 |
| USP43      | 0,307380635 | 0,313286521  | 0 | N.A. | 0 |
| TNKS2      | 0,307351143 | 0,331756461  | 0 | N.A. | 0 |
| MAP2K4     | 0,307202558 | 0,029585275  | 0 | N.A. | 0 |
| ZCCHC6     | 0,307144401 | 0,378845472  | 0 | N.A. | 0 |
| JOSD2      | 0,307143993 | 0,161844586  | 0 | N.A. | 0 |
| IL17RE     | 0,307075235 | 0,608755747  | 0 | N.A. | 0 |
| PITPNM3    | 0,307055639 | 0,287134847  | 0 | N.A. | 0 |
| TRANK1     | 0,307055237 | 0,152703616  | 0 | N.A. | 0 |
| CD24       | 0,306910912 | 0,061668488  | 0 | N.A. | 0 |
| TRIM22     | 0,306801301 | 0,109333675  | 0 | N.A. | 0 |
| PTPN22     | 0,306695405 | 0,167721575  | 0 | N.A. | 0 |
| SREBF1     | 0,306416383 | 0,426208533  | 0 | N.A. | 0 |
| PCED1B     | 0,306415662 | 0,441589152  | 0 | N.A. | 0 |
| FAM83E     | 0,306214463 | 0,237548037  | 0 | N.A. | 0 |
| MYO9B      | 0,30620893  | 0,363427921  | 0 | N.A. | 0 |
| C16orf72   | 0,306137071 | 0,394669242  | 0 | N.A. | 0 |
| TRIM33     | 0,306082783 | 0,43791206   | 0 | N.A. | 0 |
| SLC1A1     | 0,305993344 | 0,634985669  | 0 | N.A. | 0 |
| CTNNB1     | 0,305909572 | 0,234197308  | 0 | N.A. | 0 |
| CEBPB      | 0,305834701 | 0,209273086  | 0 | N.A. | 0 |

|             |             |              |   |      |   |
|-------------|-------------|--------------|---|------|---|
| SREK1IP1    | 0,305730571 | 0,217452271  | 0 | N.A. | 0 |
| CIB1        | 0,30557232  | 0,484330293  | 0 | N.A. | 0 |
| ZC3H11A     | 0,30531839  | 0,31995325   | 0 | N.A. | 0 |
| PRKAG2      | 0,305255432 | 0,321762226  | 0 | N.A. | 0 |
| PRELID2     | 0,305158398 | 0,205565133  | 0 | N.A. | 0 |
| KCP         | 0,304857433 | 0,454200945  | 0 | N.A. | 0 |
| SMIM1       | 0,304762843 | 0,08565733   | 0 | N.A. | 0 |
| DAPK1       | 0,304691427 | 0,434760455  | 0 | N.A. | 0 |
| RP11-670E13 | 0,304518451 | 0,312401666  | 0 | N.A. | 0 |
| IL13RA2     | 0,304437453 | 0,184696571  | 0 | N.A. | 0 |
| CSRNP1      | 0,304338854 | 0,001792055  | 0 | N.A. | 0 |
| IQSEC2      | 0,304321041 | -0,019249646 | 0 | N.A. | 0 |
| FAM134A     | 0,304108084 | 0,359469629  | 0 | N.A. | 0 |
| GNPTG       | 0,304107808 | 0,09896081   | 0 | N.A. | 0 |
| CRK         | 0,303948942 | 0,221894088  | 0 | N.A. | 0 |
| RNF144A     | 0,303932839 | 0,043827853  | 0 | N.A. | 0 |
| TMEM133     | 0,303897998 | 0,232530872  | 0 | N.A. | 0 |
| EDN1        | 0,303869535 | 0,602691396  | 0 | N.A. | 0 |
| TTC17       | 0,30385419  | 0,406570972  | 0 | N.A. | 0 |
| IL4R        | 0,303755497 | 0,310910392  | 0 | N.A. | 0 |
| SNX25       | 0,303725934 | -0,120490329 | 0 | N.A. | 0 |
| PPP2R2A     | 0,303535807 | 0,470861573  | 0 | N.A. | 0 |
| NAMPT       | 0,303502332 | 0,086805189  | 0 | N.A. | 0 |
| TPPP3       | 0,303498829 | 0,172839768  | 0 | N.A. | 0 |
| RP5-968D22. | 0,303458928 | 0,181322382  | 0 | N.A. | 0 |
| PPP1R2      | 0,303392863 | 0,075914217  | 0 | N.A. | 0 |
| TBC1D8      | 0,303320028 | 0,388979704  | 0 | N.A. | 0 |
| WNT11       | 0,303205956 | 0,519684735  | 0 | N.A. | 0 |
| RP11-1398P2 | 0,303078446 | 0,365822743  | 0 | N.A. | 0 |
| FXD1        | 0,302982408 | 0,204910519  | 0 | N.A. | 0 |
| DGCR2       | 0,302908896 | 0,678458899  | 0 | N.A. | 0 |
| WWP2        | 0,302860847 | 0,337977127  | 0 | N.A. | 0 |
| GCC2        | 0,302482344 | 0,564205664  | 0 | N.A. | 0 |



|            |             |              |   |      |   |
|------------|-------------|--------------|---|------|---|
| SLC7A7     | 0,302464684 | 0,426305058  | 0 | N.A. | 0 |
| PIK3AP1    | 0,302400657 | 0,119931839  | 0 | N.A. | 0 |
| ABCD1      | 0,302395294 | 0,189856984  | 0 | N.A. | 0 |
| MIA        | 0,302159451 | -0,26754741  | 0 | N.A. | 0 |
| MARK3      | 0,301999015 | 0,453734837  | 0 | N.A. | 0 |
| WDR26      | 0,301872245 | 0,255057336  | 0 | N.A. | 0 |
| XKR9       | 0,30157778  | 0,237873761  | 0 | N.A. | 0 |
| ALPI       | 0,301431187 | 0,347915297  | 0 | N.A. | 0 |
| DEFB4A     | 0,301333516 | 0,306251413  | 0 | N.A. | 0 |
| PDE8A      | 0,301256058 | 0,181276833  | 0 | N.A. | 0 |
| RFNG       | 0,30123586  | 0,281329913  | 0 | N.A. | 0 |
| AFTPH      | 0,301149192 | 0,295422553  | 0 | N.A. | 0 |
| VTCN1      | 0,301006256 | 0,055322146  | 0 | N.A. | 0 |
| LINC00704  | 0,300970685 | 0,274085433  | 0 | N.A. | 0 |
| OGT        | 0,300926406 | 0,271122998  | 0 | N.A. | 0 |
| HBP1       | 0,300805237 | 0,346502078  | 0 | N.A. | 0 |
| NAPG       | 0,300681127 | 0,378816066  | 0 | N.A. | 0 |
| VPS13D     | 0,300412253 | 0,394273918  | 0 | N.A. | 0 |
| CAMSAP2    | 0,300398112 | 0,503978694  | 0 | N.A. | 0 |
| SEPT10     | 0,300283565 | 0,477304244  | 0 | N.A. | 0 |
| UBR2       | 0,300119986 | 0,256945832  | 0 | N.A. | 0 |
| EXT1       | 0,299940544 | 0,273412297  | 0 | N.A. | 0 |
| PHACTR2    | 0,299738264 | 0,39494145   | 0 | N.A. | 0 |
| C6orf141   | 0,29964761  | 0,40355356   | 0 | N.A. | 0 |
| MAP3K13    | 0,299602613 | 0,137454229  | 0 | N.A. | 0 |
| HERC5      | 0,299451488 | 0,1086528    | 0 | N.A. | 0 |
| NEDD4L     | 0,299413886 | 0,344265346  | 0 | N.A. | 0 |
| PLCXD1     | 0,299243146 | 0,284218817  | 0 | N.A. | 0 |
| AC118754.4 | 0,299003036 | 0,141078261  | 0 | N.A. | 0 |
| ALPPL2     | 0,298960476 | 0,216166735  | 0 | N.A. | 0 |
| CXCL17     | 0,298956341 | -0,044502029 | 0 | N.A. | 0 |
| ARID5A     | 0,298826007 | -0,042927868 | 0 | N.A. | 0 |
| HIP1R      | 0,298807611 | 0,634492201  | 0 | N.A. | 0 |

|               |                    |                    |          |            |   |
|---------------|--------------------|--------------------|----------|------------|---|
| CYP2C18       | 0,298552711        | -0,008842563       | 0        | N.A.       | 0 |
| MGAT2         | 0,298437126        | 0,441570076        | 0        | N.A.       | 0 |
| TSC22D1       | 0,298377587        | 0,257860827        | 0        | N.A.       | 0 |
| TUFT1         | 0,298134987        | 0,500444267        | 0        | N.A.       | 0 |
| TNFRSF1B      | 0,297881222        | -0,06004691        | 0        | N.A.       | 0 |
| RPTN          | 0,297568817        | 0,014573621        | 0        | N.A.       | 0 |
| RALGAPB       | 0,297545165        | 0,295383117        | 0        | N.A.       | 0 |
| MICALCL       | 0,297542534        | 0,19987932         | 0        | N.A.       | 0 |
| TEC           | 0,297193791        | -0,03612256        | 0        | N.A.       | 0 |
| YKT6          | 0,29710141         | 0,334911404        | 0        | N.A.       | 0 |
| <b>FAM83A</b> | <b>0,297027805</b> | <b>0,110919615</b> | <b>1</b> | <b>cl1</b> | 0 |
| GSK3A         | 0,296941826        | 0,250430907        | 0        | N.A.       | 0 |
| KCNS3         | 0,296759892        | 0,090151561        | 0        | N.A.       | 0 |
| CTD-2260A1    | 0,296534208        | -0,001847417       | 0        | N.A.       | 0 |
| PYGB          | 0,296436865        | 0,455326157        | 0        | N.A.       | 0 |
| SH3TC1        | 0,296421205        | 0,377716281        | 0        | N.A.       | 0 |
| ARCN1         | 0,296363929        | 0,216862234        | 0        | N.A.       | 0 |
| LINC01088     | 0,296333556        | 0,075499548        | 0        | N.A.       | 0 |
| ADAM8         | 0,296321185        | 0,626456614        | 0        | N.A.       | 0 |
| VAMP3         | 0,296295133        | 0,148225778        | 0        | N.A.       | 0 |
| USP12         | 0,296055665        | 0,412170654        | 0        | N.A.       | 0 |
| PTPRU         | 0,296036178        | 0,073343004        | 0        | N.A.       | 0 |
| TAB3          | 0,295873349        | 0,204632021        | 0        | N.A.       | 0 |
| SLC35F6       | 0,295597678        | 0,453909763        | 0        | N.A.       | 0 |
| ERMP1         | 0,295501118        | 0,099275516        | 0        | N.A.       | 0 |
| DIO3OS        | 0,295455048        | 0,220079696        | 0        | N.A.       | 0 |
| FAM89B        | 0,295437612        | 0,280977664        | 0        | N.A.       | 0 |
| <b>RIPK4</b>  | <b>0,295384362</b> | <b>0,569656779</b> | <b>1</b> | <b>cl1</b> | 0 |
| PIP5K1B       | 0,295376466        | 0,316609085        | 0        | N.A.       | 0 |
| ZBTB18        | 0,295025272        | 0,302565328        | 0        | N.A.       | 0 |
| NCOA3         | 0,29487539         | 0,294449072        | 0        | N.A.       | 0 |
| LPIN1         | 0,294811329        | 0,311788733        | 0        | N.A.       | 0 |
| SMIM14        | 0,294157808        | 0,639454783        | 0        | N.A.       | 0 |

|             |             |              |   |      |   |
|-------------|-------------|--------------|---|------|---|
| ZBTB4       | 0,294126801 | 0,070792501  | 0 | N.A. | 0 |
| CDK18       | 0,294100962 | 0,328828482  | 0 | N.A. | 0 |
| C10orf12    | 0,294026698 | 0,272307788  | 0 | N.A. | 0 |
| PRDM2       | 0,294002087 | 0,090576384  | 0 | N.A. | 0 |
| WFDC10B     | 0,293891831 | 0,155188783  | 0 | N.A. | 0 |
| ST6GALNAC6  | 0,293684684 | 0,34902863   | 0 | N.A. | 0 |
| SERPIN2     | 0,293478605 | 0,455033018  | 0 | N.A. | 0 |
| MOB3B       | 0,293476316 | 0,255007285  | 0 | N.A. | 0 |
| HTR1D       | 0,293421261 | 0,249719695  | 0 | N.A. | 0 |
| CASP4       | 0,293298845 | 0,336349312  | 0 | N.A. | 0 |
| SAP30BP     | 0,293143556 | 0,353341106  | 0 | N.A. | 0 |
| TMPRSS11D   | 0,293140263 | 0,228223926  | 0 | N.A. | 0 |
| ATF4        | 0,292842366 | 0,300529231  | 0 | N.A. | 0 |
| GGT1        | 0,292692254 | 0,331269979  | 0 | N.A. | 0 |
| MUC15       | 0,292529517 | 0,041286063  | 0 | N.A. | 0 |
| LINC01468   | 0,292455537 |              | 0 | N.A. | 0 |
| AC021218.2  | 0,292393875 | -0,047399678 | 0 | N.A. | 0 |
| KB-1615E4.2 | 0,292313857 | -0,104212778 | 0 | N.A. | 0 |
| JMJD1C      | 0,292245867 | 0,413711503  | 0 | N.A. | 0 |
| CCDC6       | 0,292181073 | 0,210514231  | 0 | N.A. | 0 |
| HNF4A       | 0,292106879 | 0,243906282  | 0 | N.A. | 0 |
| FAM135A     | 0,292089973 | 0,429916001  | 0 | N.A. | 0 |
| TRAF3       | 0,291986808 | 0,112365166  | 0 | N.A. | 0 |
| DBNDD1      | 0,291880003 | 0,333645899  | 0 | N.A. | 0 |
| ZMIZ1       | 0,291820294 | 0,442438933  | 0 | N.A. | 0 |
| C6orf15     | 0,29138091  | 0,301632129  | 0 | N.A. | 0 |
| BRWD3       | 0,291368553 | 0,220092757  | 0 | N.A. | 0 |
| CTA-384D8.3 | 0,291363011 | 0,091562128  | 0 | N.A. | 0 |
| RP11-803D5. | 0,29122896  | 0,582474009  | 0 | N.A. | 0 |
| AC144449.1  | 0,291205355 | -0,14780323  | 0 | N.A. | 0 |
| JAK2        | 0,291181161 | 0,190253899  | 0 | N.A. | 0 |
| SEMA4G      | 0,291147511 | 0,388243285  | 0 | N.A. | 0 |
| OGFR        | 0,291107636 | 0,447568047  | 0 | N.A. | 0 |

|              |                    |                    |          |            |   |
|--------------|--------------------|--------------------|----------|------------|---|
| GNG5         | 0,291010897        | -0,059232295       | 0        | N.A.       | 0 |
| IL1B         | 0,291005145        | 0,356522252        | 0        | N.A.       | 0 |
| SLC35E4      | 0,290928366        | 0,29426138         | 0        | N.A.       | 0 |
| C15orf62     | 0,290567632        | 0,457384613        | 0        | N.A.       | 0 |
| STEAP2       | 0,29050949         | 0,533076968        | 0        | N.A.       | 0 |
| YIPF1        | 0,290500037        | 0,269745988        | 0        | N.A.       | 0 |
| BDKRB1       | 0,290493219        | 0,068610545        | 0        | N.A.       | 0 |
| LITAF        | 0,290461091        | -0,002577244       | 0        | N.A.       | 0 |
| ARHGAP35     | 0,290209139        | 0,275513127        | 0        | N.A.       | 0 |
| MB21D2       | 0,29014403         | 0,195846487        | 0        | N.A.       | 0 |
| NRIP1        | 0,290114817        | 0,041726707        | 0        | N.A.       | 0 |
| LINC01564    | 0,290095267        | 0,431758423        | 0        | N.A.       | 0 |
| MALT1        | 0,290073141        | 0,185910538        | 0        | N.A.       | 0 |
| RAB11FIP5    | 0,29002871         | 0,114173973        | 0        | N.A.       | 0 |
| GAK          | 0,28995011         | 0,341176979        | 0        | N.A.       | 0 |
| HSPB1        | 0,289935309        | 0,49489335         | 0        | N.A.       | 0 |
| ZNF554       | 0,289919248        | -0,091066385       | 0        | N.A.       | 0 |
| ATP2A2       | 0,289815834        | 0,478427882        | 0        | N.A.       | 0 |
| ARF4         | 0,289731091        | 0,139312085        | 0        | N.A.       | 0 |
| TMBIM6       | 0,289680093        | 0,466836041        | 0        | N.A.       | 0 |
| C11orf85     | 0,289646737        | 0,192080097        | 0        | N.A.       | 0 |
| WNT2B        | 0,289585767        | 0,16828219         | 0        | N.A.       | 0 |
| NAB1         | 0,289570431        | 0,122527297        | 0        | N.A.       | 0 |
| <b>KLK11</b> | <b>0,289449087</b> | <b>0,638973157</b> | <b>1</b> | <b>cl1</b> | 0 |
| SYT7         | 0,289443467        | 0,311243901        | 0        | N.A.       | 0 |
| RP11-53M11   | 0,289324276        | -0,133187711       | 0        | N.A.       | 0 |
| KAT6A        | 0,288909908        | 0,311436169        | 0        | N.A.       | 0 |
| CSNK1D       | 0,288709271        | 0,543620093        | 0        | N.A.       | 0 |
| FZD7         | 0,288623331        | 0,170983943        | 0        | N.A.       | 0 |
| SH3RF2       | 0,288551085        | 0,343317864        | 0        | N.A.       | 0 |
| RP11-702B10  | 0,288527063        |                    | 0        | N.A.       | 0 |
| SUCO         | 0,288509781        | 0,525272747        | 0        | N.A.       | 0 |
| SYVN1        | 0,288503227        | 0,388087448        | 0        | N.A.       | 0 |

|             |             |              |   |      |   |
|-------------|-------------|--------------|---|------|---|
| PTK2        | 0,288292999 | 0,344182555  | 0 | N.A. | 0 |
| MAN2A1      | 0,288197787 | 0,334272248  | 0 | N.A. | 0 |
| C4BPA       | 0,288159713 | -0,071647204 | 0 | N.A. | 0 |
| IFIT1       | 0,288156474 | 0,364061671  | 0 | N.A. | 0 |
| DUSP10      | 0,287975028 | 0,575413495  | 0 | N.A. | 0 |
| AP1AR       | 0,287901628 | 0,398424802  | 0 | N.A. | 0 |
| RTN2        | 0,287831557 | 0,103152739  | 0 | N.A. | 0 |
| RP11-314N13 | 0,287821338 | 0,332903244  | 0 | N.A. | 0 |
| MICAL1      | 0,287821139 | 0,338373951  | 0 | N.A. | 0 |
| ATP6V1A     | 0,287809072 | 0,180330684  | 0 | N.A. | 0 |
| FAM219A     | 0,287708402 | 0,015452146  | 0 | N.A. | 0 |
| ZNRF2       | 0,287680329 | -0,170865083 | 0 | N.A. | 0 |
| RP11-63P12. | 0,287592988 | 0,223926891  | 0 | N.A. | 0 |
| RP11-817J15 | 0,287551034 | -0,29861886  | 0 | N.A. | 0 |
| LINC00342   | 0,287483485 | 0,469545547  | 0 | N.A. | 0 |
| BTBD7       | 0,287246665 | 0,276381833  | 0 | N.A. | 0 |
| SP6         | 0,287201218 | 0,257484973  | 0 | N.A. | 0 |
| NEU1        | 0,28715232  | 0,393451978  | 0 | N.A. | 0 |
| RICTOR      | 0,287099142 | 0,456475946  | 0 | N.A. | 0 |
| ENDOD1      | 0,287079684 | 0,65834214   | 0 | N.A. | 0 |
| MAX         | 0,286944019 | 0,423546883  | 0 | N.A. | 0 |
| TMEM184B    | 0,286757774 | 0,397477127  | 0 | N.A. | 0 |
| MAP3K6      | 0,286739704 | 0,291226473  | 0 | N.A. | 0 |
| RFFL        | 0,286678542 | 0,18250647   | 0 | N.A. | 0 |
| FAM127A     | 0,28667677  | 0,128057111  | 0 | N.A. | 0 |
| GLTPD2      | 0,286664351 | 0,238525813  | 0 | N.A. | 0 |
| HBEGF       | 0,286595643 | 0,377658497  | 0 | N.A. | 0 |
| PLAT        | 0,286574784 | 0,176210729  | 0 | N.A. | 0 |
| FLNA        | 0,2863217   | 0,281339764  | 0 | N.A. | 0 |
| ABL2        | 0,286308614 | 0,424169011  | 0 | N.A. | 0 |
| VSIG1       | 0,286288912 | -0,127286099 | 0 | N.A. | 0 |
| CIDEB       | 0,286266417 | 0,306754612  | 0 | N.A. | 0 |
| PIP5K1C     | 0,286060781 | 0,144106116  | 0 | N.A. | 0 |

|             |             |              |   |      |   |
|-------------|-------------|--------------|---|------|---|
| SPSB3       | 0,285925821 | 0,503083335  | 0 | N.A. | 0 |
| BCYRN1      | 0,285889503 | 0,161565266  | 0 | N.A. | 0 |
| WFDC12      | 0,285789336 | 0,259588828  | 0 | N.A. | 0 |
| LINC00857   | 0,28571368  | 0,08725317   | 0 | N.A. | 0 |
| UNC5CL      | 0,285672837 | 0,291215674  | 0 | N.A. | 0 |
| FBXL3       | 0,285655956 | 0,600952791  | 0 | N.A. | 0 |
| KNDC1       | 0,285654644 | 0,147802838  | 0 | N.A. | 0 |
| RP11-290L1. | 0,285545733 | -0,228780697 | 0 | N.A. | 0 |
| MMP10       | 0,285532773 | 0,477251101  | 0 | N.A. | 0 |
| SCNN1A      | 0,285343433 | 0,574779104  | 1 | cl1  | 0 |
| ZMYM5       | 0,285159359 | 0,262441294  | 0 | N.A. | 0 |
| RP11-493L12 | 0,285086978 | -0,155855592 | 0 | N.A. | 0 |
| USP6NL      | 0,285052724 | 0,28814275   | 0 | N.A. | 0 |
| PLEKHA6     | 0,284909291 | 0,444508615  | 0 | N.A. | 0 |
| TLR3        | 0,284770874 | 0,205634504  | 0 | N.A. | 0 |
| GOLGB1      | 0,284590681 | 0,491958174  | 0 | N.A. | 0 |
| FAM84B      | 0,284587264 | 0,50544707   | 0 | N.A. | 0 |
| BAIAP2      | 0,284488795 | 0,580506814  | 1 | cl1  | 0 |
| FUT11       | 0,284392407 | -0,037002281 | 0 | N.A. | 0 |
| PPP1R18     | 0,284386551 | 0,108782299  | 0 | N.A. | 0 |
| RIPK1       | 0,284028153 | 0,447105876  | 0 | N.A. | 0 |
| DTX2        | 0,283802989 | 0,415859215  | 0 | N.A. | 0 |
| KIAA0355    | 0,283642461 | 0,281585805  | 0 | N.A. | 0 |
| UBAP1       | 0,283466633 | 0,075607771  | 0 | N.A. | 0 |
| CPTP        | 0,283411258 | -0,03126035  | 0 | N.A. | 0 |
| ZDHHC2      | 0,28336636  | 0,147004635  | 0 | N.A. | 0 |
| OGDH        | 0,283351641 | 0,494197704  | 0 | N.A. | 0 |
| C7orf43     | 0,283255498 | 0,420787165  | 0 | N.A. | 0 |
| MORC3       | 0,283126395 | 0,396222625  | 0 | N.A. | 0 |
| MLPH        | 0,283124886 | 0,724688291  | 0 | N.A. | 0 |
| MARK2       | 0,28308024  | 0,611271664  | 0 | N.A. | 0 |
| FBXO33      | 0,282680897 | -0,047642592 | 0 | N.A. | 0 |
| ANKRD36C    | 0,282559723 | 0,602099678  | 0 | N.A. | 0 |

|             |             |             |   |      |   |
|-------------|-------------|-------------|---|------|---|
| FLNC        | 0,282495838 | 0,494136717 | 0 | N.A. | 0 |
| ORMDL2      | 0,282439271 | 0,574252506 | 0 | N.A. | 0 |
| RTN4R       | 0,282362915 | 0,564394141 | 0 | N.A. | 0 |
| PARP12      | 0,282295986 | 0,422260055 | 0 | N.A. | 0 |
| LINC00675   | 0,282204105 | 0,230985471 | 0 | N.A. | 0 |
| CTC-436P18. | 0,282139174 | 0,484182371 | 0 | N.A. | 0 |
| HDAC7       | 0,281820081 | 0,346244221 | 0 | N.A. | 0 |
| PRSS23      | 0,281806849 | 0,424423189 | 0 | N.A. | 0 |
| KIAA0930    | 0,281663097 | 0,147093514 | 0 | N.A. | 0 |
| ACVR1       | 0,281653666 | 0,305694947 | 0 | N.A. | 0 |
| CCNL2       | 0,281646859 | 0,400666395 | 0 | N.A. | 0 |
| FAM65A      | 0,281498788 | 0,251616663 | 0 | N.A. | 0 |
| PCSK6       | 0,280928095 | 0,144072082 | 0 | N.A. | 0 |
| FAM222B     | 0,280872325 | 0,160822432 | 0 | N.A. | 0 |
| MPRIIP-AS1  | 0,280628639 | 0,233182934 | 0 | N.A. | 0 |
| RNF38       | 0,280568897 | 0,164507006 | 0 | N.A. | 0 |
| TMEM43      | 0,280461078 | 0,606507708 | 0 | N.A. | 0 |
| CA3         | 0,28040229  | 0,375511628 | 0 | N.A. | 0 |
| KDM5B       | 0,280372886 | 0,585450682 | 0 | N.A. | 0 |
| C11orf80    | 0,280363123 | 0,541624354 | 0 | N.A. | 0 |
| OSBPL8      | 0,28023986  | 0,0774138   | 0 | N.A. | 0 |
| RNF207      | 0,280045264 | 0,30942885  | 0 | N.A. | 0 |
| BARX2       | 0,27995322  | 0,164062845 | 0 | N.A. | 0 |
| MAP3K1      | 0,279784711 | 0,163517959 | 0 | N.A. | 0 |
| ZFYVE27     | 0,279605665 | 0,569428398 | 0 | N.A. | 0 |
| FRMD5       | 0,279601085 | 0,515656895 | 0 | N.A. | 0 |
| UBE2J1      | 0,279551695 | 0,181589307 | 0 | N.A. | 0 |
| TNFAIP3     | 0,279206873 | 0,106933513 | 0 | N.A. | 0 |
| SLC26A9     | 0,279072116 | 0,161678792 | 0 | N.A. | 0 |
| DKK4        | 0,278918404 | 0,308787876 | 0 | N.A. | 0 |
| KDM7A       | 0,278842655 | 0,267131934 | 0 | N.A. | 0 |
| SLC22A23    | 0,278779735 | 0,054682073 | 0 | N.A. | 0 |
| RP5-1086K13 | 0,278769735 | -0,08206304 | 0 | N.A. | 0 |

|             |             |              |   |      |   |
|-------------|-------------|--------------|---|------|---|
| TPK1        | 0,278462647 | -0,000398284 | 0 | N.A. | 0 |
| MOB2        | 0,278384905 | 0,295191796  | 0 | N.A. | 0 |
| HABP4       | 0,278362818 | 0,138659461  | 0 | N.A. | 0 |
| FAM155A     | 0,278337576 | -0,060954454 | 1 | none | 0 |
| NFKBIZ      | 0,278288703 | 0,379315598  | 0 | N.A. | 0 |
| NCF2        | 0,278262504 | 0,519844446  | 0 | N.A. | 0 |
| RTN4        | 0,278192195 | 0,483267871  | 0 | N.A. | 0 |
| PI4K2A      | 0,278183696 | 0,007423908  | 0 | N.A. | 0 |
| SERPINB4    | 0,278026351 | 0,112527022  | 0 | N.A. | 0 |
| BTNL8       | 0,277997104 | 0,457545044  | 0 | N.A. | 0 |
| NUP50-AS1   | 0,27772756  | 0,267185129  | 0 | N.A. | 0 |
| DHDDS       | 0,27772229  | 0,1116221    | 0 | N.A. | 0 |
| APOBEC3A    | 0,277565353 | 0,034718947  | 0 | N.A. | 0 |
| HERPUD1     | 0,277383918 | 0,242722054  | 0 | N.A. | 0 |
| APOBR       | 0,27727535  | 0,083652096  | 0 | N.A. | 0 |
| USP32       | 0,277236072 | 0,206449771  | 0 | N.A. | 0 |
| CCDC71L     | 0,277212691 | -0,024913126 | 0 | N.A. | 0 |
| TEF         | 0,277163564 | 0,249289352  | 0 | N.A. | 0 |
| PLEKHF2     | 0,276891203 | 0,286118688  | 0 | N.A. | 0 |
| AARS        | 0,276852982 | 0,294110051  | 0 | N.A. | 0 |
| LARGE       | 0,276832478 | 0,237974705  | 0 | N.A. | 0 |
| GGT6        | 0,276740296 | 0,059130035  | 0 | N.A. | 0 |
| RAI2        | 0,276716799 | 0,294922349  | 0 | N.A. | 0 |
| L1CAM       | 0,276657699 | 0,276026057  | 0 | N.A. | 0 |
| IRF1        | 0,276585347 | 0,335881775  | 0 | N.A. | 0 |
| RAB31       | 0,276575844 | -0,11991011  | 0 | N.A. | 0 |
| BLVRB       | 0,27653487  | 0,26042574   | 0 | N.A. | 0 |
| FBRS        | 0,276488524 | 0,344520234  | 0 | N.A. | 0 |
| CXorf38     | 0,276488053 | 0,000272578  | 0 | N.A. | 0 |
| WNT7A       | 0,276351758 | 0,397296572  | 0 | N.A. | 0 |
| IGFBP6      | 0,276223628 | 0,109372448  | 0 | N.A. | 0 |
| SPATA13     | 0,276134905 | 0,156218145  | 0 | N.A. | 0 |
| RP11-383J24 | 0,276081042 | 0,357206282  | 0 | N.A. | 0 |



|              |                    |                    |          |            |   |
|--------------|--------------------|--------------------|----------|------------|---|
| PROSER2      | 0,276029044        | 0,354413819        | 0        | N.A.       | 0 |
| VGLL4        | 0,275851315        | 0,117211038        | 0        | N.A.       | 0 |
| COL9A2       | 0,275809995        | 0,187207457        | 0        | N.A.       | 0 |
| IFI44L       | 0,27553869         | 0,20813096         | 0        | N.A.       | 0 |
| RP11-873E20  | 0,275473124        | -0,079960731       | 0        | N.A.       | 0 |
| GFPT1        | 0,275299701        | 0,361859051        | 0        | N.A.       | 0 |
| C11orf96     | 0,275275858        | 0,06843192         | 0        | N.A.       | 0 |
| B3GAT2       | 0,27527304         | 0,157884378        | 0        | N.A.       | 0 |
| EXOC1        | 0,275256294        | 0,484769628        | 0        | N.A.       | 0 |
| TRADD        | 0,275227947        | 0,585178575        | 0        | N.A.       | 0 |
| <b>MROH6</b> | <b>0,275006238</b> | <b>0,321619797</b> | <b>1</b> | <b>cl1</b> | 0 |
| FAM127B      | 0,274975253        | 0,174679097        | 0        | N.A.       | 0 |
| PARP9        | 0,274735455        | 0,521940264        | 0        | N.A.       | 0 |
| IL36G        | 0,274696676        | 0,265274454        | 0        | N.A.       | 0 |
| PEAR1        | 0,274669136        | 0,492835233        | 0        | N.A.       | 0 |
| SLC22A4      | 0,274566829        | 0,114524478        | 0        | N.A.       | 0 |
| ATXN2L       | 0,274511996        | 0,337331815        | 0        | N.A.       | 0 |
| FKBP9        | 0,274327756        | 0,347639369        | 0        | N.A.       | 0 |
| NPC2         | 0,274205132        | 0,19535715         | 0        | N.A.       | 0 |
| ACER3        | 0,274133657        | 0,093775366        | 0        | N.A.       | 0 |
| ASPG         | 0,27412696         | 0,129124777        | 0        | N.A.       | 0 |
| DKK1         | 0,274113396        | 0,375653348        | 0        | N.A.       | 0 |
| BOD1L1       | 0,274041518        | 0,245724484        | 0        | N.A.       | 0 |
| FOCAD        | 0,273880505        | 0,121592856        | 0        | N.A.       | 0 |
| ANKRD11      | 0,27385401         | 0,451288235        | 0        | N.A.       | 0 |
| SLC2A3       | 0,273825513        | 0,423898004        | 0        | N.A.       | 0 |
| FOXJ2        | 0,273730938        | 0,105489353        | 0        | N.A.       | 0 |
| PQLC2        | 0,273713739        | -0,011590455       | 0        | N.A.       | 0 |
| AC004951.6   | 0,273627954        | 0,22211903         | 0        | N.A.       | 0 |
| ARHGEF4      | 0,273597077        | 0,355367088        | 0        | N.A.       | 0 |
| MKLN1        | 0,273474346        | 0,366543222        | 0        | N.A.       | 0 |
| CX3CL1       | 0,273430647        | 0,432081072        | 0        | N.A.       | 0 |
| CSF1         | 0,27329472         | 0,129089859        | 0        | N.A.       | 0 |

|             |             |              |   |      |   |
|-------------|-------------|--------------|---|------|---|
| ST8SIA6     | 0,273174579 | 0,288945228  | 0 | N.A. | 0 |
| DUSP8       | 0,273170514 | 0,480848629  | 0 | N.A. | 0 |
| FBN2        | 0,273155925 | 0,140003672  | 0 | N.A. | 0 |
| UBE2D1      | 0,273095885 | 0,393271339  | 0 | N.A. | 0 |
| FANK1       | 0,273083945 | 0,26927472   | 0 | N.A. | 0 |
| ATG14       | 0,273021692 | 0,043564604  | 0 | N.A. | 0 |
| ADAM12      | 0,272950188 | -0,085550159 | 0 | N.A. | 0 |
| FURIN       | 0,272778374 | 0,42127299   | 0 | N.A. | 0 |
| PIGZ        | 0,272589721 | 0,216435415  | 0 | N.A. | 0 |
| MGC50722    | 0,272205379 | -0,294732299 | 0 | N.A. | 0 |
| NHSL2       | 0,272175686 | -0,139370012 | 0 | N.A. | 0 |
| ZMYND15     | 0,27216159  | 0,134101882  | 0 | N.A. | 0 |
| FCHO2       | 0,272066139 | 0,533101614  | 0 | N.A. | 0 |
| ENKUR       | 0,272040342 | 0,354338834  | 0 | N.A. | 0 |
| RP11-96H19. | 0,271983814 | -0,35784321  | 0 | N.A. | 0 |
| SYT8        | 0,27192882  | 0,382456574  | 0 | N.A. | 0 |
| SPG11       | 0,271873607 | 0,339984324  | 0 | N.A. | 0 |
| SLC27A1     | 0,27182209  | 0,085312171  | 0 | N.A. | 0 |
| MDK         | 0,271771326 | 0,633781093  | 0 | N.A. | 0 |
| CTA-243E7.1 | 0,271692713 | 0,204991321  | 0 | N.A. | 0 |
| RALBP1      | 0,271610376 | 0,355783412  | 0 | N.A. | 0 |
| SMOX        | 0,271537161 | 0,261237641  | 0 | N.A. | 0 |
| AC006273.5  | 0,271172658 | 0,413273476  | 0 | N.A. | 0 |
| STXBP5      | 0,27095825  | 0,294749429  | 0 | N.A. | 0 |
| ZFYVE28     | 0,270779872 | 0,175631543  | 0 | N.A. | 0 |
| TRIM38      | 0,270732851 | -0,075482031 | 0 | N.A. | 0 |
| TBC1D20     | 0,27068803  | 0,399354272  | 0 | N.A. | 0 |
| DGKE        | 0,270682897 | 0,285431665  | 0 | N.A. | 0 |
| ATF6        | 0,270682641 | 0,120033981  | 0 | N.A. | 0 |
| CDC42EP1    | 0,270661392 | 0,242341405  | 0 | N.A. | 0 |
| CHD2        | 0,270644202 | 0,309992779  | 0 | N.A. | 0 |
| TREML2      | 0,27050786  | 0,328826918  | 0 | N.A. | 0 |
| LRRC75B     | 0,270467004 | 0,280857647  | 0 | N.A. | 0 |

|            |             |              |   |      |   |
|------------|-------------|--------------|---|------|---|
| UHMK1      | 0,270327449 | 0,452618611  | 0 | N.A. | 0 |
| YWHAG      | 0,27019127  | 0,407326486  | 0 | N.A. | 0 |
| ZNF846     | 0,270039878 | -0,067153836 | 0 | N.A. | 0 |
| C1orf226   | 0,270014984 | 0,24208776   | 0 | N.A. | 0 |
| TRNP1      | 0,269899577 | 0,127508758  | 0 | N.A. | 0 |
| TMEM131    | 0,269817798 | 0,123959751  | 0 | N.A. | 0 |
| MSN        | 0,269802373 | -0,128866486 | 0 | N.A. | 0 |
| NOXA1      | 0,269751539 | 0,279647882  | 0 | N.A. | 0 |
| FGFR2      | 0,269652064 | 0,384516558  | 0 | N.A. | 0 |
| OSBPL10    | 0,269649558 | 0,20232705   | 0 | N.A. | 0 |
| CDKN1C     | 0,269638008 | 0,629799621  | 0 | N.A. | 0 |
| PNPLA6     | 0,26962998  | 0,464915195  | 0 | N.A. | 0 |
| CREB3L2    | 0,26960469  | 0,322153606  | 0 | N.A. | 0 |
| TMOD1      | 0,269281878 | -0,171903282 | 0 | N.A. | 0 |
| SPPL3      | 0,269142608 | 0,308363872  | 0 | N.A. | 0 |
| PRNP       | 0,269118955 | 0,142940176  | 0 | N.A. | 0 |
| LEPR       | 0,268950267 | -0,115587741 | 0 | N.A. | 0 |
| MGEA5      | 0,268819649 | 0,382983675  | 0 | N.A. | 0 |
| DGAT1      | 0,268650831 | 0,49690751   | 0 | N.A. | 0 |
| PPTC7      | 0,268587225 | 0,197146214  | 0 | N.A. | 0 |
| SBF1       | 0,268546523 | 0,405216885  | 0 | N.A. | 0 |
| ARFGEF1    | 0,268494122 | 0,340321574  | 0 | N.A. | 0 |
| ARPC1B     | 0,268482374 | 0,165541803  | 0 | N.A. | 0 |
| FLJ20021   | 0,268444388 | 0,0687964    | 0 | N.A. | 0 |
| AP006285.2 | 0,268108627 | 0,170833145  | 0 | N.A. | 0 |
| CD177      | 0,267989952 | 0,192054091  | 0 | N.A. | 0 |
| PHACTR3    | 0,267877339 | 0,292044842  | 0 | N.A. | 0 |
| RNF170     | 0,267847136 | 0,396863794  | 0 | N.A. | 0 |
| TFEB       | 0,267777635 | 0,51529989   | 0 | N.A. | 0 |
| ABR        | 0,267686926 | 0,378943593  | 0 | N.A. | 0 |
| DIAPH2     | 0,267492985 | 0,109583381  | 0 | N.A. | 0 |
| RP11-1348G | 0,267425467 | 0,007552628  | 0 | N.A. | 0 |
| IL36RN     | 0,267308731 |              | 0 | N.A. | 0 |

|             |             |              |   |      |   |
|-------------|-------------|--------------|---|------|---|
| SYT17       | 0,267249925 | 0,384915262  | 0 | N.A. | 0 |
| RC3H1       | 0,267239984 | 0,29339941   | 0 | N.A. | 0 |
| CSNK2A2     | 0,26708986  | 0,03237048   | 0 | N.A. | 0 |
| SERPINB3    | 0,26691971  | 0,068229557  | 0 | N.A. | 0 |
| RAB40B      | 0,266915066 | 0,247723886  | 0 | N.A. | 0 |
| FUT6        | 0,26689919  | 0,269986709  | 0 | N.A. | 0 |
| DUOXA1      | 0,266863141 | 0,251756977  | 0 | N.A. | 0 |
| HIST1H2AD   | 0,26677441  |              | 0 | N.A. | 0 |
| CRABP2      | 0,266732341 | -0,054212486 | 0 | N.A. | 0 |
| TRIO        | 0,266575494 | 0,211985112  | 0 | N.A. | 0 |
| MAPK8IP1    | 0,26657189  | 0,18459148   | 0 | N.A. | 0 |
| ZNF768      | 0,266500757 | 0,369668449  | 0 | N.A. | 0 |
| PKP3        | 0,266294685 | 0,741235859  | 0 | N.A. | 0 |
| SAPCD1-AS1  | 0,266267042 | 0,207317654  | 0 | N.A. | 0 |
| DOCK1       | 0,266173423 | 0,383922686  | 0 | N.A. | 0 |
| KPNA7       | 0,265965629 | 0,476246785  | 0 | N.A. | 0 |
| NDUFA4L2    | 0,265877457 | 0,025611072  | 0 | N.A. | 0 |
| RP11-449J21 | 0,265873511 | 0,045491937  | 0 | N.A. | 0 |
| PDK4        | 0,265861572 | -0,051733745 | 0 | N.A. | 0 |
| AP1G1       | 0,265810237 | 0,430962192  | 0 | N.A. | 0 |
| SEMA4D      | 0,265710213 | 0,079381958  | 0 | N.A. | 0 |
| DTX4        | 0,265642774 | 0,416316142  | 0 | N.A. | 0 |
| EDAR        | 0,265600106 | 0,135589674  | 0 | N.A. | 0 |
| ZDHHC18     | 0,265578127 | 0,210970885  | 0 | N.A. | 0 |
| RALGPS1     | 0,265547064 | 0,378544607  | 0 | N.A. | 0 |
| CDV3        | 0,265509995 | 0,090180979  | 0 | N.A. | 0 |
| SETD1B      | 0,265497204 | 0,072509219  | 0 | N.A. | 0 |
| FNBP4       | 0,265384545 | 0,291059084  | 0 | N.A. | 0 |
| TPTEP1      | 0,265184687 | 0,164126271  | 0 | N.A. | 0 |
| TMEM37      | 0,2651568   | 0,49216098   | 0 | N.A. | 0 |
| FICD        | 0,265138722 | 0,152629169  | 0 | N.A. | 0 |
| SKIV2L      | 0,265115661 | -0,175731197 | 0 | N.A. | 0 |
| CEP350      | 0,265088706 | 0,431323136  | 0 | N.A. | 0 |

|           |             |              |   |      |   |
|-----------|-------------|--------------|---|------|---|
| RAPGEF1   | 0,265048552 | 0,445693047  | 0 | N.A. | 0 |
| NLRC5     | 0,265015128 | 0,216925628  | 0 | N.A. | 0 |
| MON2      | 0,264996243 | 0,432749059  | 0 | N.A. | 0 |
| CAPNS1    | 0,2649058   | 0,494801315  | 0 | N.A. | 0 |
| GPSM1     | 0,264821251 | 0,326959004  | 0 | N.A. | 0 |
| MST1      | 0,26478554  | 0,232247572  | 0 | N.A. | 0 |
| CREB3L1   | 0,264563703 | 0,49137497   | 0 | N.A. | 0 |
| INPP5K    | 0,264495971 | -0,02351475  | 0 | N.A. | 0 |
| TMC1      | 0,264329582 |              | 0 | N.A. | 0 |
| FABP3     | 0,264179377 | 0,07483328   | 0 | N.A. | 0 |
| ENTPD8    | 0,263981979 | 0,476928772  | 0 | N.A. | 0 |
| EGF       | 0,263960317 | 0,035903874  | 0 | N.A. | 0 |
| IFITM10   | 0,263935227 | 0,178578408  | 0 | N.A. | 0 |
| TUBB6     | 0,263926957 | 0,271713308  | 0 | N.A. | 0 |
| ARL14     | 0,263833485 | 0,5130588    | 0 | N.A. | 0 |
| HIST1H2BG | 0,263832336 | 0,164376079  | 0 | N.A. | 0 |
| SULF2     | 0,263497369 | 0,372073641  | 0 | N.A. | 0 |
| RRAS2     | 0,263455702 | 0,137365873  | 0 | N.A. | 0 |
| NOS1AP    | 0,263381397 | 0,273880926  | 0 | N.A. | 0 |
| DEDD2     | 0,263340493 | 0,149415708  | 0 | N.A. | 0 |
| LAMP3     | 0,26285524  | -0,103403305 | 0 | N.A. | 0 |
| MAML2     | 0,26268484  | 0,292472585  | 0 | N.A. | 0 |
| LDLRAP1   | 0,262649196 | 0,324730731  | 0 | N.A. | 0 |
| CD63      | 0,262613725 | 0,533503476  | 0 | N.A. | 0 |
| ANKRD13C  | 0,262577996 | 0,218232375  | 0 | N.A. | 0 |
| FLOT1     | 0,262477242 | 0,123890011  | 0 | N.A. | 0 |
| HIST2H2BE | 0,262436173 | 0,288670576  | 1 | cl1  | 0 |
| PIK3IP1   | 0,26243424  | 0,394528554  | 0 | N.A. | 0 |
| C8orf58   | 0,262347475 | 0,06135126   | 0 | N.A. | 0 |
| CUEDC1    | 0,262130313 | 0,408817111  | 0 | N.A. | 0 |
| MYO1B     | 0,262057308 | 0,066135306  | 0 | N.A. | 0 |
| NFYA      | 0,262027635 | -0,127082154 | 0 | N.A. | 0 |
| SHC2      | 0,261993839 | 0,353961991  | 0 | N.A. | 0 |

|             |             |              |   |      |   |
|-------------|-------------|--------------|---|------|---|
| VGLL1       | 0,261985683 |              | 1 | cl1  | 0 |
| TBL1X       | 0,26189896  | 0,065104856  | 0 | N.A. | 0 |
| HMCN2       | 0,261778462 | 0,256730902  | 0 | N.A. | 0 |
| ACTBL2      | 0,261709053 | -0,226075085 | 0 | N.A. | 0 |
| RAB3B       | 0,261585556 | 0,506821793  | 0 | N.A. | 0 |
| CHPF2       | 0,261556487 | 0,39222557   | 0 | N.A. | 0 |
| HSPA13      | 0,261466539 | 0,327022207  | 0 | N.A. | 0 |
| IRS2        | 0,261418195 | 0,42053152   | 0 | N.A. | 0 |
| RP11-104N10 | 0,261153926 | 0,062125261  | 0 | N.A. | 0 |
| ANKRD20A3   | 0,261081094 | -0,037457803 | 0 | N.A. | 0 |
| ARFGAP1     | 0,260959423 | 0,289912149  | 0 | N.A. | 0 |
| TBC1D9B     | 0,260910513 | 0,361853074  | 0 | N.A. | 0 |
| ARPP19      | 0,260876354 | 0,287189835  | 0 | N.A. | 0 |
| PPARG       | 0,260847027 | 0,252504301  | 0 | N.A. | 0 |
| ATP8A1      | 0,260842007 | 0,482513642  | 0 | N.A. | 0 |
| KRT12       | 0,260745314 | 0,34927221   | 0 | N.A. | 0 |
| SURF4       | 0,260700314 | 0,366787151  | 0 | N.A. | 0 |
| KIF13A      | 0,260676223 | 0,066507303  | 0 | N.A. | 0 |
| LOXL4       | 0,260623288 | -0,020110186 | 0 | N.A. | 0 |
| AMOT        | 0,260485128 | 0,345744055  | 0 | N.A. | 0 |
| MAST3       | 0,260187334 | 0,015213145  | 0 | N.A. | 0 |
| SYT12       | 0,260146319 |              | 0 | N.A. | 0 |
| CSNK1A1     | 0,260080472 | 0,420727459  | 0 | N.A. | 0 |
| TEAD1       | 0,26002196  | 0,226793092  | 0 | N.A. | 0 |
| RP11-758N13 | 0,259877621 | 0,085086587  | 0 | N.A. | 0 |
| PLEKHG2     | 0,259819843 | 0,010709798  | 0 | N.A. | 0 |
| TGFBR2      | 0,259513689 | 0,367411793  | 0 | N.A. | 0 |
| RAB3GAP1    | 0,259389082 | 0,299702653  | 0 | N.A. | 0 |
| MCOLN1      | 0,259196686 | 0,265019959  | 0 | N.A. | 0 |
| STRIP2      | 0,259157109 | 0,360901934  | 0 | N.A. | 0 |
| CTD-2105E13 | 0,259129436 | 0,173440517  | 0 | N.A. | 0 |
| CYP3A4      | 0,25892724  | 0,341472503  | 0 | N.A. | 0 |
| CREBBP      | 0,258781042 | 0,342361855  | 0 | N.A. | 0 |

|            |             |              |   |      |   |
|------------|-------------|--------------|---|------|---|
| AP000679.2 | 0,258642104 | -0,095659278 | 0 | N.A. | 0 |
| FAM160A1   | 0,258503011 | 0,349554582  | 0 | N.A. | 0 |
| DCUN1D3    | 0,258301857 | 0,219694535  | 0 | N.A. | 0 |
| BCAN       | 0,258030562 | 0,240514801  | 0 | N.A. | 0 |
| MT-ND4L    | 0,257916921 | 0,176785878  | 0 | N.A. | 0 |
| KCTD9      | 0,257829093 | 0,099936407  | 0 | N.A. | 0 |
| FER1L6     | 0,257820824 | 0,310543168  | 0 | N.A. | 0 |
| MYZAP      | 0,25780232  | 0,361121247  | 0 | N.A. | 0 |
| SHARPIN    | 0,257712478 | 0,079118733  | 0 | N.A. | 0 |
| DISP1      | 0,257616776 | -0,043139553 | 0 | N.A. | 0 |
| KALRN      | 0,257556705 | 0,477160141  | 0 | N.A. | 0 |
| CA2        | 0,257460552 | 0,217400694  | 0 | N.A. | 0 |
| CMIP       | 0,257453063 | 0,455258038  | 0 | N.A. | 0 |
| CGGBP1     | 0,257292809 | -0,217938224 | 0 | N.A. | 0 |
| TNRC18     | 0,257246759 | 0,313772487  | 0 | N.A. | 0 |
| SYTL4      | 0,257124033 | 0,194841914  | 0 | N.A. | 0 |
| CPM        | 0,2570604   | 0,349714787  | 0 | N.A. | 0 |
| NMRK1      | 0,256987686 | 0,219192671  | 0 | N.A. | 0 |
| TRPV6      | 0,256981415 | 0,1622822    | 0 | N.A. | 0 |
| NR5A2      | 0,25689295  | 0,145039825  | 0 | N.A. | 0 |
| MTRNR2L1   | 0,256769813 | 0,085571464  | 0 | N.A. | 0 |
| DLEU7-AS1  | 0,256712504 | 0,045948568  | 0 | N.A. | 0 |
| GPT        | 0,256647771 | 0,272956088  | 0 | N.A. | 0 |
| NUMB       | 0,256522134 | 0,519026918  | 0 | N.A. | 0 |
| PPFIBP1    | 0,256383007 | 0,385850068  | 0 | N.A. | 0 |
| RRAD       | 0,256233998 | 0,423521914  | 0 | N.A. | 0 |
| DLG1       | 0,256198712 | 0,612884929  | 0 | N.A. | 0 |
| ITFG1      | 0,256162971 | 0,480276124  | 0 | N.A. | 0 |
| PRRX2      | 0,256065015 | 0,210138707  | 0 | N.A. | 0 |
| MON1B      | 0,256014047 | 0,223306177  | 0 | N.A. | 0 |
| PRR13      | 0,255958367 | 0,073671475  | 0 | N.A. | 0 |
| AFAP1L2    | 0,255782058 | 0,154427713  | 0 | N.A. | 0 |
| UBTD2      | 0,255776657 | 0,286753723  | 0 | N.A. | 0 |

|             |             |              |   |      |   |
|-------------|-------------|--------------|---|------|---|
| POU5F1      | 0,255603399 | 0,07153459   | 0 | N.A. | 0 |
| GPRIN2      | 0,255602882 | 0,363410158  | 0 | N.A. | 0 |
| ZNF587      | 0,255596617 | 0,409071338  | 0 | N.A. | 0 |
| ACAP1       | 0,255561046 | 0,177512546  | 0 | N.A. | 0 |
| BTN2A1      | 0,255550126 | 0,214121457  | 0 | N.A. | 0 |
| ENTPD4      | 0,255350948 | 0,512195734  | 0 | N.A. | 0 |
| ELK4        | 0,255347247 | 0,221048236  | 0 | N.A. | 0 |
| SIRT2       | 0,255291386 | 0,396203071  | 0 | N.A. | 0 |
| FAM91A1     | 0,254980733 | 0,178089369  | 0 | N.A. | 0 |
| GALNT6      | 0,254963693 | 0,326347093  | 0 | N.A. | 0 |
| SOS2        | 0,254906166 | 0,206206898  | 0 | N.A. | 0 |
| PTP4A1      | 0,254717826 | -0,045199029 | 0 | N.A. | 0 |
| CTH         | 0,254676195 | 0,069811446  | 0 | N.A. | 0 |
| CDC42SE2    | 0,254665728 | 0,037466918  | 0 | N.A. | 0 |
| RP11-35P15. | 0,25463493  | 0,136176334  | 0 | N.A. | 0 |
| ARL6IP5     | 0,254601613 | 0,456919542  | 0 | N.A. | 0 |
| NDP         | 0,254573401 | 0,376759479  | 0 | N.A. | 0 |
| OSTF1       | 0,254563484 | 0,171380194  | 0 | N.A. | 0 |
| MICALL1     | 0,254555553 | -0,090065938 | 0 | N.A. | 0 |
| PNRC1       | 0,254437969 | -0,090399001 | 0 | N.A. | 0 |
| GNB5        | 0,25439153  | 0,024164472  | 0 | N.A. | 0 |
| LMNTD2      | 0,254240915 | 0,306060551  | 0 | N.A. | 0 |
| CASZ1       | 0,254212446 | 0,393515428  | 0 | N.A. | 0 |
| STAT3       | 0,254172542 | 0,18367225   | 0 | N.A. | 0 |
| POGZ        | 0,254086103 | 0,082292776  | 0 | N.A. | 0 |
| THSD7A      | 0,25392127  | 0,165316632  | 0 | N.A. | 0 |
| CYP1A1      | 0,253850417 |              | 0 | N.A. | 0 |
| CATSPER1    | 0,253832854 | 0,402125523  | 0 | N.A. | 0 |
| CLDND1      | 0,25381639  | 0,342064452  | 0 | N.A. | 0 |
| SMAD7       | 0,253454591 | 0,078482973  | 0 | N.A. | 0 |
| RUNX1       | 0,25343466  | 0,072579134  | 0 | N.A. | 0 |
| ADAMTS9     | 0,253284766 | 0,492987343  | 0 | N.A. | 0 |
| TVP23B      | 0,253217586 | 0,056294329  | 0 | N.A. | 0 |



|             |             |              |   |      |   |
|-------------|-------------|--------------|---|------|---|
| OSMR-AS1    | 0,253215716 |              | 0 | N.A. | 0 |
| XCR1        | 0,253206587 | -0,005945365 | 0 | N.A. | 0 |
| HLA-DMA     | 0,253136844 | -0,382304217 | 0 | N.A. | 0 |
| PTPN21      | 0,253110549 | 0,194401947  | 0 | N.A. | 0 |
| HRH1        | 0,253104538 | 0,582774322  | 0 | N.A. | 0 |
| TPRN        | 0,253067424 | 0,316246508  | 0 | N.A. | 0 |
| ANKRD37     | 0,253044652 | 0,336502373  | 0 | N.A. | 0 |
| XK          | 0,252875226 | 0,180793939  | 0 | N.A. | 0 |
| ADAMTSL4    | 0,252822263 | -0,057622993 | 0 | N.A. | 0 |
| NCCRP1      | 0,252668545 | 0,36551367   | 0 | N.A. | 0 |
| GPR137B     | 0,252628262 | 0,513215654  | 0 | N.A. | 0 |
| MGAT1       | 0,25258354  | -0,098139582 | 0 | N.A. | 0 |
| DCTN4       | 0,252483082 | 0,075163013  | 0 | N.A. | 0 |
| LMO7DN      | 0,252441986 | 0,364156615  | 0 | N.A. | 0 |
| NKAIN3      | 0,252404355 | 0,405150364  | 0 | N.A. | 0 |
| IDO1        | 0,252329333 | 0,217949834  | 0 | N.A. | 0 |
| AC115522.3  | 0,25204623  |              | 0 | N.A. | 0 |
| LDHD        | 0,251942663 | 0,040534333  | 0 | N.A. | 0 |
| RAP1GAP2    | 0,251851953 | 0,366150533  | 0 | N.A. | 0 |
| RASSF3      | 0,251831541 | 0,052060858  | 0 | N.A. | 0 |
| FBXW7       | 0,251668261 | 0,150992839  | 0 | N.A. | 0 |
| IQCD        | 0,251651656 | 0,105507616  | 0 | N.A. | 0 |
| SSH2        | 0,251565167 | -0,040153018 | 0 | N.A. | 0 |
| CARD11      | 0,251564954 | 0,295217215  | 0 | N.A. | 0 |
| RP11-1399P1 | 0,251494531 | 0,280957632  | 0 | N.A. | 0 |
| KIAA0226    | 0,251442743 | 0,315994361  | 0 | N.A. | 0 |
| EAF1        | 0,25143258  | -0,091477865 | 0 | N.A. | 0 |
| GATAD1      | 0,251390042 | 0,209954886  | 0 | N.A. | 0 |
| TPRXL       | 0,251384483 | 0,100841154  | 0 | N.A. | 0 |
| PIAS1       | 0,251314229 | 0,500272087  | 0 | N.A. | 0 |
| CASC19      | 0,251275409 | -0,095622261 | 0 | N.A. | 0 |
| CTC-444N24. | 0,251255843 | 0,427091883  | 0 | N.A. | 0 |
| SLC9A2      | 0,251224277 | 0,119757724  | 0 | N.A. | 0 |

|             |             |              |   |      |   |
|-------------|-------------|--------------|---|------|---|
| ARRDC3      | 0,251121955 | 0,337691147  | 0 | N.A. | 0 |
| SEC16A      | 0,251054012 | 0,386220307  | 0 | N.A. | 0 |
| SNX18       | 0,25101189  | -0,11778417  | 0 | N.A. | 0 |
| HIF1A       | 0,250955257 | 0,14023406   | 0 | N.A. | 0 |
| RP11-288L9. | 0,250859213 | 0,152838775  | 0 | N.A. | 0 |
| EIF4G3      | 0,250829814 | 0,311722299  | 0 | N.A. | 0 |
| GPBP1       | 0,250735274 | 0,12755131   | 0 | N.A. | 0 |
| TNS1        | 0,250355651 | -0,078054137 | 0 | N.A. | 0 |
| PLD2        | 0,250248548 | 0,372485545  | 0 | N.A. | 0 |
| FNDC3A      | 0,250207254 | 0,213650697  | 0 | N.A. | 0 |
| RP11-156K13 | 0,250090079 | 0,110242104  | 0 | N.A. | 0 |
| LINC01226   | 0,24995983  |              | 0 | N.A. | 0 |
| TAF10       | 0,24988124  | 0,252003838  | 0 | N.A. | 0 |
| WWTR1       | 0,249879552 | 0,285367327  | 0 | N.A. | 0 |
| CLU         | 0,24980257  | 0,156857428  | 0 | N.A. | 0 |
| GLTSCR1     | 0,24978939  | 0,232403587  | 0 | N.A. | 0 |
| BEAN1       | 0,249625815 | 0,543980386  | 0 | N.A. | 0 |
| ZNRF1       | 0,249582146 | -0,045233386 | 0 | N.A. | 0 |
| DIRC2       | 0,249545257 | 0,285755165  | 0 | N.A. | 0 |
| DUSP14      | 0,249510576 | 0,201917919  | 0 | N.A. | 0 |
| UTP14C      | 0,249456886 | 0,288856163  | 0 | N.A. | 0 |
| CYLD        | 0,249372102 | 0,260173064  | 0 | N.A. | 0 |
| ABHD4       | 0,249370032 | 0,228161495  | 0 | N.A. | 0 |
| RP11-267C16 | 0,24935341  | 0,306911103  | 0 | N.A. | 0 |
| USP38       | 0,249338323 | 0,0467155    | 0 | N.A. | 0 |
| TFCP2L1     | 0,249337194 | -0,132784458 | 0 | N.A. | 0 |
| ZNF160      | 0,249282434 | 0,32238561   | 0 | N.A. | 0 |
| SUV420H1    | 0,24926965  | 0,328185573  | 0 | N.A. | 0 |
| CDH3        | 0,249214371 | 0,550531908  | 0 | N.A. | 0 |
| POU2F2      | 0,249193205 | -0,114375993 | 0 | N.A. | 0 |
| GEM         | 0,249142627 | 0,333352513  | 0 | N.A. | 0 |
| PARP6       | 0,249116377 | 0,132440045  | 0 | N.A. | 0 |
| PANK3       | 0,248939096 | 0,575142735  | 0 | N.A. | 0 |

|             |             |              |   |      |   |
|-------------|-------------|--------------|---|------|---|
| LGALS9C     | 0,248920913 | 0,195581481  | 0 | N.A. | 0 |
| BAZ2A       | 0,248895654 | 0,532437652  | 0 | N.A. | 0 |
| PID1        | 0,248737903 | 0,363246944  | 0 | N.A. | 0 |
| MBNL1       | 0,248654306 | -0,169595424 | 0 | N.A. | 0 |
| OTUD1       | 0,248629799 | 0,032094712  | 0 | N.A. | 0 |
| PPP1R21     | 0,248517331 | 0,514596573  | 0 | N.A. | 0 |
| KIF1B       | 0,248458575 | 0,222634956  | 0 | N.A. | 0 |
| SLC16A5     | 0,248326495 | 0,546255915  | 0 | N.A. | 0 |
| AC240274.1  | 0,248304357 | -0,089007314 | 0 | N.A. | 0 |
| DLG5        | 0,248066673 | 0,362329063  | 0 | N.A. | 0 |
| CXCL8       | 0,248052178 | 0,041565847  | 0 | N.A. | 0 |
| MEP1A       | 0,248000857 | 0,108468396  | 0 | N.A. | 0 |
| CTSA        | 0,247976911 | 0,442853414  | 0 | N.A. | 0 |
| EFR3A       | 0,24796825  | -0,216633732 | 0 | N.A. | 0 |
| PPP3CA      | 0,247896229 | 0,471589636  | 0 | N.A. | 0 |
| SLC30A1     | 0,247854664 | 0,498775429  | 0 | N.A. | 0 |
| ALDOC       | 0,247795302 | 0,516828988  | 0 | N.A. | 0 |
| CCNK        | 0,24761648  | 0,090482946  | 0 | N.A. | 0 |
| VDAC2       | 0,247571928 | 0,272984405  | 0 | N.A. | 0 |
| CALCOCO2    | 0,247523559 | 0,194391325  | 0 | N.A. | 0 |
| SUV420H2    | 0,247509125 | 0,312368205  | 0 | N.A. | 0 |
| GOLGA7B     | 0,247496341 | 0,351929068  | 0 | N.A. | 0 |
| ELFN2       | 0,247492095 | -0,029356882 | 0 | N.A. | 0 |
| CTA-363E6.2 | 0,247392196 | 0,116116359  | 0 | N.A. | 0 |
| CD276       | 0,247292378 | 0,362179568  | 0 | N.A. | 0 |
| AC007246.3  | 0,247287441 | 0,367142684  | 0 | N.A. | 0 |
| ZDHC5       | 0,247286595 | 0,291724181  | 0 | N.A. | 0 |
| PRKCI       | 0,247269296 | 0,211933031  | 0 | N.A. | 0 |
| DGKQ        | 0,24722312  | 0,440050125  | 0 | N.A. | 0 |
| MAN2B2      | 0,247173848 | 0,138910937  | 0 | N.A. | 0 |
| PDLIM1      | 0,247138727 | 0,13214068   | 0 | N.A. | 0 |
| TMEM57      | 0,247121937 | 0,487660205  | 0 | N.A. | 0 |
| USP9X       | 0,247052732 | 0,449280939  | 0 | N.A. | 0 |

|             |             |              |   |      |   |
|-------------|-------------|--------------|---|------|---|
| SMCO2       | 0,246912562 | 0,097610043  | 0 | N.A. | 0 |
| LSMEM2      | 0,246892862 |              | 0 | N.A. | 0 |
| FEM1B       | 0,246878702 | -0,056374094 | 0 | N.A. | 0 |
| SZT2        | 0,246867898 | 0,260560469  | 0 | N.A. | 0 |
| LUCAT1      | 0,246854624 | 0,228053787  | 0 | N.A. | 0 |
| PGPEP1      | 0,246823305 | 0,288478714  | 0 | N.A. | 0 |
| ADD1        | 0,24664652  | 0,540135175  | 0 | N.A. | 0 |
| DYRK1A      | 0,246640116 | 0,219402584  | 0 | N.A. | 0 |
| NCK2        | 0,246353949 | 0,229621367  | 0 | N.A. | 0 |
| TULP4       | 0,246280358 | 0,404471593  | 0 | N.A. | 0 |
| GBA         | 0,246184994 | 0,224274491  | 0 | N.A. | 0 |
| ACSL5       | 0,246182099 | 0,398827966  | 0 | N.A. | 0 |
| STAT5A      | 0,246119301 | 0,174902496  | 0 | N.A. | 0 |
| EIF4A2      | 0,246020837 | 0,2758582    | 0 | N.A. | 0 |
| CHMP5       | 0,245879966 | 0,253683001  | 0 | N.A. | 0 |
| DDX3X       | 0,245838035 | 0,418532693  | 0 | N.A. | 0 |
| ZNF274      | 0,245812446 | 0,140528122  | 0 | N.A. | 0 |
| TMEM50B     | 0,245244572 | 0,477338218  | 0 | N.A. | 0 |
| DENND6B     | 0,24513408  | 0,390578124  | 0 | N.A. | 0 |
| SLC7A1      | 0,245044166 | 0,300572719  | 0 | N.A. | 0 |
| GPX4        | 0,244952953 | 0,18182995   | 0 | N.A. | 0 |
| PPP6R1      | 0,244922306 | 0,442493319  | 0 | N.A. | 0 |
| YIPF2       | 0,244903408 | 0,333087529  | 0 | N.A. | 0 |
| EGFR-AS1    | 0,244793232 |              | 0 | N.A. | 0 |
| VMP1        | 0,244759848 | 0,539431743  | 0 | N.A. | 0 |
| PRRG4       | 0,244641205 | 0,655374634  | 0 | N.A. | 0 |
| PIGA        | 0,244583874 | 0,07723843   | 0 | N.A. | 0 |
| TSC22D3     | 0,244439502 | -0,228406217 | 0 | N.A. | 0 |
| INPP5A      | 0,244429581 | 0,134122557  | 0 | N.A. | 0 |
| ZNF808      | 0,24437629  | 0,313870315  | 0 | N.A. | 0 |
| RBPM5       | 0,244328208 | 0,361963569  | 0 | N.A. | 0 |
| RP6-99M1.3  | 0,244314366 | 0,162933013  | 0 | N.A. | 0 |
| RP11-245G13 | 0,244222841 | 0,061453543  | 0 | N.A. | 0 |

|              |             |              |   |      |   |
|--------------|-------------|--------------|---|------|---|
| PLEKHM2      | 0,244193269 | 0,10120128   | 0 | N.A. | 0 |
| KRT23        | 0,244133658 | 0,378158204  | 0 | N.A. | 0 |
| KBTBD2       | 0,244122492 | 0,083418891  | 0 | N.A. | 0 |
| CTB-191K22.  | 0,2440065   | 0,389529157  | 0 | N.A. | 0 |
| XYLT1        | 0,243975997 | 0,406644971  | 0 | N.A. | 0 |
| PRSS36       | 0,243904085 | 0,101879493  | 0 | N.A. | 0 |
| CLDN18       | 0,243848969 | 0,323606682  | 0 | N.A. | 0 |
| B3GNT7       | 0,243739068 | 0,640502485  | 0 | N.A. | 0 |
| UNC93B1      | 0,243699455 | 0,765831854  | 0 | N.A. | 0 |
| RP3-446N13.  | 0,243633864 | 0,254531286  | 0 | N.A. | 0 |
| RP11-757F18  | 0,24357369  | 0,337931685  | 0 | N.A. | 0 |
| NIPA1        | 0,243547035 | 0,442797007  | 0 | N.A. | 0 |
| S100A13      | 0,243542742 | 0,313989123  | 0 | N.A. | 0 |
| DBP          | 0,24350292  | 0,289116405  | 0 | N.A. | 0 |
| ABCA5        | 0,243470575 | 0,269142412  | 0 | N.A. | 0 |
| BCAM         | 0,243403218 | 0,204677464  | 0 | N.A. | 0 |
| MAMDC4       | 0,243377631 | 0,137385742  | 0 | N.A. | 0 |
| MAP3K10      | 0,243308121 | 0,127998992  | 0 | N.A. | 0 |
| PTPRB        | 0,243198003 | 0,446886591  | 0 | N.A. | 0 |
| PER1         | 0,243013871 | 0,365973567  | 0 | N.A. | 0 |
| RP11-20I23.8 | 0,242869453 | 0,132884882  | 0 | N.A. | 0 |
| DLG3         | 0,242821746 | 0,399175719  | 0 | N.A. | 0 |
| ZNF462       | 0,242803301 | 0,023112846  | 0 | N.A. | 0 |
| ADAM28       | 0,242797546 | 0,329749141  | 0 | N.A. | 0 |
| SLC15A3      | 0,242726065 | 0,184523796  | 0 | N.A. | 0 |
| ZNF264       | 0,242568193 | 0,177078817  | 0 | N.A. | 0 |
| FBXO46       | 0,242412885 | 0,004865038  | 0 | N.A. | 0 |
| ARFGEF2      | 0,242345345 | 0,125589204  | 0 | N.A. | 0 |
| KRT14        | 0,242237984 | 0,066390249  | 0 | N.A. | 0 |
| GOLPH3       | 0,242207138 | 0,145593898  | 0 | N.A. | 0 |
| DAAM1        | 0,242206625 | 0,562909828  | 0 | N.A. | 0 |
| TTYH2        | 0,24214693  | 0,267107503  | 0 | N.A. | 0 |
| KAT2B        | 0,242062022 | -0,025303201 | 0 | N.A. | 0 |

|              |                    |                    |          |             |   |
|--------------|--------------------|--------------------|----------|-------------|---|
| DAB2         | 0,242022681        | 0,126672128        | 0        | N.A.        | 0 |
| FO538757.2   | 0,241938561        | 0,36343757         | 0        | N.A.        | 0 |
| CDSN         | 0,241935238        | 0,368797137        | 0        | N.A.        | 0 |
| SNX13        | 0,241903619        | 0,078359163        | 0        | N.A.        | 0 |
| SLC51A       | 0,241841483        | 0,450046423        | 0        | N.A.        | 0 |
| TIE1         | 0,241727796        | -0,232642349       | 0        | N.A.        | 0 |
| C17orf62     | 0,241688465        | 0,217826937        | 0        | N.A.        | 0 |
| TRIB2        | 0,241652772        | 0,265707996        | 0        | N.A.        | 0 |
| PLEKHA8      | 0,241632069        | -0,040476573       | 0        | N.A.        | 0 |
| KDM5A        | 0,241459785        | 0,300537895        | 0        | N.A.        | 0 |
| <b>FXYD4</b> | <b>0,241354317</b> | <b>0,190993936</b> | <b>1</b> | <b>cls3</b> | 0 |
| ZDHHHC14     | 0,241323352        | 0,356245645        | 0        | N.A.        | 0 |
| XXYL1-AS2    | 0,241291896        | 0,280214022        | 0        | N.A.        | 0 |
| TPRG1        | 0,241244799        | 0,230724945        | 0        | N.A.        | 0 |
| ATXN7L3      | 0,241210807        | 0,3641474          | 0        | N.A.        | 0 |
| GRIPAP1      | 0,241207372        | 0,314001714        | 0        | N.A.        | 0 |
| LMBR1L       | 0,241142806        | 0,278752158        | 0        | N.A.        | 0 |
| FNBP1L       | 0,241126046        | 0,49224565         | 0        | N.A.        | 0 |
| MED16        | 0,241091964        | 0,266300623        | 0        | N.A.        | 0 |
| PIK3C2A      | 0,240963258        | 0,313648671        | 0        | N.A.        | 0 |
| TMEM119      | 0,240932109        | -0,101123515       | 0        | N.A.        | 0 |
| ZNF677       | 0,240919924        | -0,053190423       | 0        | N.A.        | 0 |
| PSENNEN      | 0,240824           | 0,116763202        | 0        | N.A.        | 0 |
| AUTS2        | 0,240761307        | 0,320029895        | 0        | N.A.        | 0 |
| EIF1         | 0,240688695        | 0,051760021        | 0        | N.A.        | 0 |
| REL          | 0,240640199        | 0,477656395        | 0        | N.A.        | 0 |
| IL10RB-AS1   | 0,240346037        | 0,285290867        | 0        | N.A.        | 0 |
| CST3         | 0,240235699        | 0,336831224        | 0        | N.A.        | 0 |
| MFSD12       | 0,240234306        | 0,232657348        | 0        | N.A.        | 0 |
| CA1          | 0,240164942        | 0,157282374        | 0        | N.A.        | 0 |
| HERC6        | 0,240137332        | 0,365025974        | 0        | N.A.        | 0 |
| RAPGEF3      | 0,240107479        | 0,089801608        | 0        | N.A.        | 0 |
| ORAI3        | 0,240030718        | 0,247575694        | 0        | N.A.        | 0 |

|            |             |              |   |      |   |
|------------|-------------|--------------|---|------|---|
| GNAI1      | 0,239978315 | -0,027178627 | 0 | N.A. | 0 |
| MYPN       | 0,239922773 |              | 0 | N.A. | 0 |
| RNF222     | 0,239754036 |              | 0 | N.A. | 0 |
| AC011718.2 | 0,239560018 |              | 0 | N.A. | 0 |
| HHLA3      | 0,239501393 | -0,181441874 | 0 | N.A. | 0 |
| FOXD1      | 0,23947893  | 0,086338425  | 0 | N.A. | 0 |
| PAFAH2     | 0,239159935 | 0,359182799  | 0 | N.A. | 0 |
| ZNF592     | 0,239010342 | 0,16603484   | 0 | N.A. | 0 |
| GNAI2      | 0,238965397 | 0,314509441  | 0 | N.A. | 0 |
| TXK        | 0,238825955 | -0,006610798 | 0 | N.A. | 0 |
| YTHDF3     | 0,238811716 | 0,439850879  | 0 | N.A. | 0 |
| CALU       | 0,238798502 | 0,341892088  | 0 | N.A. | 0 |
| MEF2A      | 0,238796928 | 0,325428949  | 0 | N.A. | 0 |
| ZNF513     | 0,238732741 | 0,291348276  | 0 | N.A. | 0 |
| LINC01588  | 0,238687326 | 0,17039543   | 0 | N.A. | 0 |
| SETX       | 0,238652296 | 0,416835036  | 0 | N.A. | 0 |
| HECTD4     | 0,238601708 | 0,175730693  | 0 | N.A. | 0 |
| KCTD7      | 0,238375129 | -0,039038505 | 0 | N.A. | 0 |
| SLC8B1     | 0,23834438  | 0,249445269  | 0 | N.A. | 0 |
| GRIP1      | 0,238341301 | -0,205931065 | 0 | N.A. | 0 |
| C2orf54    | 0,238172277 | 0,451173563  | 0 | N.A. | 0 |
| GABARAP    | 0,238068298 | -0,194901806 | 0 | N.A. | 0 |
| PLEKHG3    | 0,237985322 | 0,458199272  | 0 | N.A. | 0 |
| ZNF543     | 0,237781854 | 0,112907887  | 0 | N.A. | 0 |
| MEX3C      | 0,237688262 | 0,076820616  | 0 | N.A. | 0 |
| CYP2C9     | 0,23766171  | 0,298616054  | 0 | N.A. | 0 |
| WNK1       | 0,237636887 | 0,171606582  | 0 | N.A. | 0 |
| TRIM56     | 0,237454485 | 0,518917574  | 0 | N.A. | 0 |
| NRIR       | 0,237248944 | 0,103009596  | 0 | N.A. | 0 |
| NCK1       | 0,237204987 | -0,233578994 | 0 | N.A. | 0 |
| ABHD17A    | 0,23710265  | 0,387339631  | 0 | N.A. | 0 |
| GPX3       | 0,237091477 | 0,265073655  | 0 | N.A. | 0 |
| IL1A       | 0,236748808 |              | 0 | N.A. | 0 |

|             |             |              |   |      |   |
|-------------|-------------|--------------|---|------|---|
| RP11-532F12 | 0,236714766 | 0,422629449  | 0 | N.A. | 0 |
| HIST1H2AE   | 0,236675302 | 0,113553563  | 0 | N.A. | 0 |
| AFAP1       | 0,236467932 | 0,274170678  | 0 | N.A. | 0 |
| DYNLRB1     | 0,23644162  | 0,275048933  | 0 | N.A. | 0 |
| HMGCS1      | 0,236343408 | 0,245898499  | 0 | N.A. | 0 |
| NRAS        | 0,236193506 | 0,005748064  | 0 | N.A. | 0 |
| CYP4F35P    | 0,236129096 | 0,172809585  | 0 | N.A. | 0 |
| TMEM140     | 0,236102544 | 0,345599703  | 0 | N.A. | 0 |
| ARNTL2      | 0,235887034 | 0,413428487  | 0 | N.A. | 0 |
| MCFD2       | 0,235838146 | 0,562250463  | 0 | N.A. | 0 |
| AGAP1       | 0,235781178 | 0,261546493  | 0 | N.A. | 0 |
| TRIM40      | 0,235721778 | 0,258997626  | 0 | N.A. | 0 |
| ARHGAP30    | 0,235680584 | 0,094947613  | 0 | N.A. | 0 |
| CPEB3       | 0,23557272  | 0,218890215  | 0 | N.A. | 0 |
| TET2        | 0,235563236 | 0,280847337  | 0 | N.A. | 0 |
| MAOB        | 0,235546008 | 0,491561227  | 0 | N.A. | 0 |
| CAMSAP3     | 0,235510327 | 0,118213607  | 0 | N.A. | 0 |
| WDTC1       | 0,235476195 | 0,215578712  | 0 | N.A. | 0 |
| PLD3        | 0,235396737 | 0,10304854   | 0 | N.A. | 0 |
| ANO9        | 0,235353848 | 0,266250696  | 0 | N.A. | 0 |
| WDR37       | 0,235349484 | -0,007626886 | 0 | N.A. | 0 |
| PLXNB1      | 0,235281133 | 0,358654567  | 0 | N.A. | 0 |
| DEGS1       | 0,235075811 | 0,318926015  | 0 | N.A. | 0 |
| SSBP3       | 0,235061533 | 0,163565365  | 0 | N.A. | 0 |
| RP11-798K3. | 0,235058082 | 0,118050898  | 0 | N.A. | 0 |
| MXRA8       | 0,234899676 | 0,094518187  | 0 | N.A. | 0 |
| NEURL1B     | 0,234757685 | 0,392365893  | 0 | N.A. | 0 |
| OSBP        | 0,23468594  | 0,409727195  | 0 | N.A. | 0 |
| ZFAND2B     | 0,234626512 | 0,528879767  | 0 | N.A. | 0 |
| TMUB2       | 0,234617767 | 0,392094448  | 0 | N.A. | 0 |
| TCN1        | 0,234584318 | 0,171940035  | 0 | N.A. | 0 |
| FAM73A      | 0,234472459 | 0,445219368  | 0 | N.A. | 0 |
| EVPL        | 0,23440583  | 0,552264513  | 0 | N.A. | 0 |



|            |             |              |   |      |   |
|------------|-------------|--------------|---|------|---|
| ARHGEF3    | 0,234346792 | 0,367108541  | 0 | N.A. | 0 |
| DIP2B      | 0,234311937 | 0,527732537  | 0 | N.A. | 0 |
| MYOM3      | 0,234292278 | -0,071675237 | 0 | N.A. | 0 |
| DUSP18     | 0,234260727 | 0,196728112  | 0 | N.A. | 0 |
| WNT7B      | 0,234176557 | 0,124509574  | 0 | N.A. | 0 |
| AP1S3      | 0,234153637 | 0,128703444  | 0 | N.A. | 0 |
| ZDHHC3     | 0,234108409 | 0,318366889  | 0 | N.A. | 0 |
| EVI5L      | 0,233941106 | 0,458093552  | 0 | N.A. | 0 |
| UBD        | 0,233895449 | -0,003209073 | 0 | N.A. | 0 |
| MAGI1      | 0,23385088  | 0,202161069  | 0 | N.A. | 0 |
| CNTFR      | 0,233843335 | 0,114657619  | 0 | N.A. | 0 |
| CTSW       | 0,233828881 | -0,103688821 | 0 | N.A. | 0 |
| RNF185     | 0,233810209 | 0,049602317  | 0 | N.A. | 0 |
| LINC00113  | 0,233741185 | 0,443246504  | 0 | N.A. | 0 |
| FLJ44511   | 0,23370222  | 0,209066946  | 0 | N.A. | 0 |
| SLC4A11    | 0,233666263 | 0,507368196  | 0 | N.A. | 0 |
| AGPAT3     | 0,233496532 | 0,263167199  | 0 | N.A. | 0 |
| SYNJ2      | 0,233470272 | 0,528116429  | 0 | N.A. | 0 |
| MAP1LC3B2  | 0,233439613 | 0,051522901  | 0 | N.A. | 0 |
| RHBDF2     | 0,233377858 | 0,337210369  | 0 | N.A. | 0 |
| CYB5R1     | 0,233236375 | 0,413690345  | 0 | N.A. | 0 |
| TMEM44     | 0,233122446 | 0,431595226  | 0 | N.A. | 0 |
| LRCH3      | 0,232981268 | 0,215992556  | 0 | N.A. | 0 |
| DENND4C    | 0,232875719 | 0,341887607  | 0 | N.A. | 0 |
| CCNYL1     | 0,232716071 | 0,477284152  | 0 | N.A. | 0 |
| RP11-6F2.5 | 0,232620305 | 0,005304834  | 0 | N.A. | 0 |
| PLA2G4C    | 0,232578188 | 0,089468449  | 0 | N.A. | 0 |
| ZFYVE1     | 0,232554327 | 0,040186994  | 0 | N.A. | 0 |
| KIRREL     | 0,232496981 | 0,278410624  | 0 | N.A. | 0 |
| PITPNA     | 0,232465427 | 0,231304754  | 0 | N.A. | 0 |
| ANO1       | 0,232133025 | 0,335438701  | 0 | N.A. | 0 |
| AC099552.4 | 0,232105556 | -0,079831104 | 0 | N.A. | 0 |
| RP11-462G2 | 0,232017351 | 0,185612752  | 0 | N.A. | 0 |

|              |                    |                    |          |             |   |
|--------------|--------------------|--------------------|----------|-------------|---|
| CCNT2        | 0,231984556        | 0,166173019        | 0        | N.A.        | 0 |
| EIF4EBP2     | 0,231920935        | 0,169562013        | 0        | N.A.        | 0 |
| FYCO1        | 0,231881537        | 0,200900132        | 0        | N.A.        | 0 |
| NET1         | 0,231716828        | 0,586748513        | 0        | N.A.        | 0 |
| RAB24        | 0,231693017        | 0,092419201        | 0        | N.A.        | 0 |
| DYNC1H1      | 0,231642444        | 0,575176798        | 0        | N.A.        | 0 |
| SLC15A4      | 0,231384511        | 0,375004099        | 0        | N.A.        | 0 |
| PGM2L1       | 0,231353877        | 0,411693544        | 0        | N.A.        | 0 |
| GPR153       | 0,23131786         | 0,412763764        | 0        | N.A.        | 0 |
| APBA3        | 0,231310275        | 0,115658947        | 0        | N.A.        | 0 |
| GATAD2A      | 0,231294897        | 0,277820461        | 0        | N.A.        | 0 |
| HYOU1        | 0,231200309        | 0,35735999         | 0        | N.A.        | 0 |
| TBC1D22B     | 0,231125493        | 0,122945732        | 0        | N.A.        | 0 |
| RUFY3        | 0,231097104        | 0,239853347        | 0        | N.A.        | 0 |
| CTA-243E7.4  | 0,231095104        | -0,031212988       | 0        | N.A.        | 0 |
| NAB2         | 0,230818494        | 0,358059651        | 0        | N.A.        | 0 |
| AC005262.2   | 0,230796556        | 0,234541956        | 0        | N.A.        | 0 |
| PRMT2        | 0,23078051         | 0,041922928        | 0        | N.A.        | 0 |
| ADCY4        | 0,230736482        | 0,291012471        | 0        | N.A.        | 0 |
| SELK         | 0,230672787        | 0,260801934        | 0        | N.A.        | 0 |
| TMEM40       | 0,230657486        | 0,013352182        | 0        | N.A.        | 0 |
| TMEM27       | 0,23051526         | 0,148395918        | 0        | N.A.        | 0 |
| PPP2R2D      | 0,230380822        | 0,243494551        | 0        | N.A.        | 0 |
| ARID1B       | 0,230242758        | 0,140447269        | 0        | N.A.        | 0 |
| <b>KRT6B</b> | <b>0,230216454</b> | <b>0,287693685</b> | <b>1</b> | <b>cls3</b> | 0 |
| GRINA        | 0,230006191        | 0,257078043        | 0        | N.A.        | 0 |
| SGPP1        | 0,229987778        | 0,088038413        | 0        | N.A.        | 0 |
| LRRC3        | 0,229941183        | 0,264578202        | 0        | N.A.        | 0 |
| FRMD8        | 0,229896235        | 0,346004817        | 0        | N.A.        | 0 |
| HIST1H4H     | 0,229859933        | 0,252566811        | 0        | N.A.        | 0 |
| RP11-417L19  | 0,229778349        | -0,111039621       | 0        | N.A.        | 0 |
| AKTIP        | 0,229685358        | 0,254797531        | 0        | N.A.        | 0 |
| MAP2K3       | 0,229660445        | 0,188607403        | 0        | N.A.        | 0 |

|             |             |              |   |      |   |
|-------------|-------------|--------------|---|------|---|
| YIPF6       | 0,229646146 | 0,303098447  | 0 | N.A. | 0 |
| SLC38A7     | 0,229558328 | 0,189856143  | 0 | N.A. | 0 |
| REC8        | 0,229440996 | 0,174542725  | 0 | N.A. | 0 |
| SULT1A2     | 0,229308626 | 0,039508385  | 0 | N.A. | 0 |
| NPTX2       | 0,229207878 |              | 0 | N.A. | 0 |
| TMEM56      | 0,22912982  | 0,221126929  | 0 | N.A. | 0 |
| CTD-3138B18 | 0,22912341  | 0,209186371  | 0 | N.A. | 0 |
| ELL2        | 0,229118621 | 0,472159226  | 0 | N.A. | 0 |
| PDE4A       | 0,229114817 | 0,046627667  | 0 | N.A. | 0 |
| SLFN5       | 0,229095921 | 0,416940366  | 0 | N.A. | 0 |
| C1QTNF6     | 0,229043455 | -0,149246611 | 0 | N.A. | 0 |
| RASA3       | 0,229040355 | 0,403606066  | 0 | N.A. | 0 |
| GCC1        | 0,229021858 | 0,016441892  | 0 | N.A. | 0 |
| EXD3        | 0,22899251  | 0,460274911  | 0 | N.A. | 0 |
| NOTCH2      | 0,22888027  | 0,476931819  | 0 | N.A. | 0 |
| PEA15       | 0,228830476 | 0,050290695  | 0 | N.A. | 0 |
| OR2A1-AS1   | 0,228652386 | 0,332764823  | 0 | N.A. | 0 |
| PSTPIP1     | 0,228600038 | 0,078821751  | 0 | N.A. | 0 |
| MOV10       | 0,228380384 | 0,312605364  | 0 | N.A. | 0 |
| RP11-10C24. | 0,228351785 | -0,163736077 | 0 | N.A. | 0 |
| KDELR3      | 0,228267058 | 0,404147656  | 0 | N.A. | 0 |
| PCMTD1      | 0,228264355 | 0,035168539  | 0 | N.A. | 0 |
| DNAJC13     | 0,228134372 | 0,260907692  | 0 | N.A. | 0 |
| STRN4       | 0,228112248 | 0,249714904  | 0 | N.A. | 0 |
| RORA        | 0,227845293 | 0,085926849  | 0 | N.A. | 0 |
| LRP11       | 0,227820277 | 0,456689107  | 0 | N.A. | 0 |
| CTC-573N18. | 0,227703396 | 0,109782588  | 0 | N.A. | 0 |
| MMEL1       | 0,227560277 | 0,450346124  | 0 | N.A. | 0 |
| CYR61       | 0,22754674  | 0,091331533  | 0 | N.A. | 0 |
| GGTLC2      | 0,227523653 | -0,079787206 | 0 | N.A. | 0 |
| ROCK1       | 0,22743423  | 0,390484512  | 0 | N.A. | 0 |
| IFI27L2     | 0,22742339  | -0,192267381 | 0 | N.A. | 0 |
| PHC2        | 0,227404213 | 0,417482235  | 0 | N.A. | 0 |

|             |             |              |   |      |   |
|-------------|-------------|--------------|---|------|---|
| PRKAA1      | 0,227387843 | 0,321922312  | 0 | N.A. | 0 |
| DOCK9       | 0,227339513 | 0,257131059  | 0 | N.A. | 0 |
| RNASE1      | 0,227273004 | -0,063213226 | 0 | N.A. | 0 |
| ANKRD29     | 0,227244358 | 0,024915818  | 0 | N.A. | 0 |
| SERAC1      | 0,22724431  | 0,153024232  | 0 | N.A. | 0 |
| SEC24A      | 0,227209307 | 0,363997449  | 0 | N.A. | 0 |
| ZNF841      | 0,227205915 | -0,001292181 | 0 | N.A. | 0 |
| SERTAD1     | 0,227176983 | 0,301629671  | 0 | N.A. | 0 |
| CLN8        | 0,227085459 | 0,434743679  | 0 | N.A. | 0 |
| ANKRD50     | 0,226975196 | 0,429682685  | 0 | N.A. | 0 |
| CORO1C      | 0,226782202 | 0,17598054   | 0 | N.A. | 0 |
| IQGAP2      | 0,22674945  | 0,232259608  | 0 | N.A. | 0 |
| FAM129A     | 0,226715056 | 0,077460263  | 0 | N.A. | 0 |
| ZNF395      | 0,22670004  | 0,209834145  | 0 | N.A. | 0 |
| NCOA1       | 0,22669405  | 0,403307738  | 0 | N.A. | 0 |
| ZNF432      | 0,226666902 | 0,213565082  | 0 | N.A. | 0 |
| RORC        | 0,226312464 | -0,217909036 | 0 | N.A. | 0 |
| BCOR        | 0,226285151 | 0,001741317  | 0 | N.A. | 0 |
| ZFHX3       | 0,226281514 | 0,343145371  | 0 | N.A. | 0 |
| ZMYND8      | 0,226268878 | 0,56509965   | 0 | N.A. | 0 |
| FAM214A     | 0,226167094 | 0,422797969  | 0 | N.A. | 0 |
| ATG12       | 0,226026085 | 0,192086664  | 0 | N.A. | 0 |
| PRDM8       | 0,225907227 | 0,264312796  | 0 | N.A. | 0 |
| MFSD11      | 0,225863857 | 0,279924643  | 0 | N.A. | 0 |
| NDFIP1      | 0,225798488 | 0,441876942  | 0 | N.A. | 0 |
| TTC22       | 0,22568613  | 0,685348138  | 0 | N.A. | 0 |
| CACNB4      | 0,225586996 | 0,379112578  | 0 | N.A. | 0 |
| RERE        | 0,225548022 | 0,236200676  | 0 | N.A. | 0 |
| LMO2        | 0,225458424 |              | 0 | N.A. | 0 |
| ACER2       | 0,225278914 | 0,102428975  | 0 | N.A. | 0 |
| FAM131A     | 0,225196422 | 0,344701719  | 0 | N.A. | 0 |
| SLC39A13    | 0,225023243 | 0,512478788  | 0 | N.A. | 0 |
| LA16c-380H5 | 0,2249062   | 0,212701586  | 0 | N.A. | 0 |

|             |             |              |   |      |   |
|-------------|-------------|--------------|---|------|---|
| FAM45A      | 0,224889914 | 0,069215118  | 0 | N.A. | 0 |
| RP11-525A16 | 0,224823045 | 0,122705054  | 0 | N.A. | 0 |
| KCNK15      | 0,224742948 | -0,095646648 | 0 | N.A. | 0 |
| TMEM165     | 0,224698774 | 0,394602276  | 0 | N.A. | 0 |
| EIF2AK3     | 0,224589412 | 0,338947099  | 0 | N.A. | 0 |
| IL15        | 0,224525648 | 0,024601135  | 0 | N.A. | 0 |
| RP13-516M1  | 0,224506348 | 0,30463566   | 0 | N.A. | 0 |
| CELA3B      | 0,224340151 | 0,275425336  | 0 | N.A. | 0 |
| ALG11       | 0,224238156 | 0,049011608  | 0 | N.A. | 0 |
| FBXO32      | 0,224153221 | 0,313394527  | 0 | N.A. | 0 |
| C8G         | 0,224120504 | 0,318591498  | 0 | N.A. | 0 |
| ENPP1       | 0,224115904 | 0,125494737  | 0 | N.A. | 0 |
| LINC00482   | 0,224061092 | 0,411155192  | 0 | N.A. | 0 |
| PPP1R14C    | 0,223969267 | 0,204354415  | 0 | N.A. | 0 |
| GTF2IRD1    | 0,223891788 | 0,426287041  | 0 | N.A. | 0 |
| AMOTL1      | 0,223866774 | -0,294683143 | 0 | N.A. | 0 |
| VWF         | 0,223385205 | -0,064953835 | 0 | N.A. | 0 |
| RND1        | 0,223375712 | 0,291814426  | 0 | N.A. | 0 |
| TSKU        | 0,223298387 | 0,374840968  | 0 | N.A. | 0 |
| ATP6VOA1    | 0,223287571 | 0,494908793  | 0 | N.A. | 0 |
| SAT2        | 0,223273454 | 0,267707022  | 0 | N.A. | 0 |
| GPR107      | 0,22324671  | 0,214224354  | 0 | N.A. | 0 |
| RP11-235E17 | 0,223208711 | 0,098697749  | 0 | N.A. | 0 |
| SMURF2      | 0,223176346 | 0,168541077  | 0 | N.A. | 0 |
| SCAMP1      | 0,223149534 | 0,18010617   | 0 | N.A. | 0 |
| CCNI        | 0,223076231 | -0,130612185 | 0 | N.A. | 0 |
| MIRLET7BHG  | 0,223040485 | 0,158948483  | 0 | N.A. | 0 |
| CBLC        | 0,222740505 | 0,413438984  | 0 | N.A. | 0 |
| NRBP1       | 0,222733056 | 0,552223626  | 0 | N.A. | 0 |
| REXO1       | 0,222622228 | 0,168057635  | 0 | N.A. | 0 |
| RP11-79H23  | 0,222357717 | 0,290707829  | 0 | N.A. | 0 |
| SLCO2A1     | 0,222317009 | 0,366468241  | 0 | N.A. | 0 |
| EYS         | 0,222237414 | -0,179185941 | 0 | N.A. | 0 |

|             |             |              |   |      |   |
|-------------|-------------|--------------|---|------|---|
| SLC12A6     | 0,222209682 | 0,296996345  | 0 | N.A. | 0 |
| RAB6B       | 0,222208428 | 0,137576874  | 0 | N.A. | 0 |
| CDYL2       | 0,222190956 | -0,030507184 | 0 | N.A. | 0 |
| IFIT3       | 0,222187845 | 0,44491209   | 0 | N.A. | 0 |
| JHDM1D-AS1  | 0,222185843 | -0,048139811 | 0 | N.A. | 0 |
| GCH1        | 0,222084161 | 0,24168179   | 0 | N.A. | 0 |
| IZUMO4      | 0,221978759 | 0,024092852  | 0 | N.A. | 0 |
| GBA2        | 0,221852318 | 0,409350189  | 0 | N.A. | 0 |
| IGHV3-66    | 0,221826963 |              | 0 | N.A. | 0 |
| TRGV5       | 0,221800956 |              | 0 | N.A. | 0 |
| ATXN1L      | 0,221786868 | 0,310360994  | 0 | N.A. | 0 |
| TMEM217     | 0,221782286 | 0,026127571  | 0 | N.A. | 0 |
| XPR1        | 0,221778806 | 0,047182067  | 0 | N.A. | 0 |
| CIC         | 0,221685337 | 0,334733639  | 0 | N.A. | 0 |
| NUP50       | 0,221677871 | 0,247669392  | 0 | N.A. | 0 |
| TRIB1       | 0,221601225 | 0,382074248  | 0 | N.A. | 0 |
| SLC25A37    | 0,221579852 | 0,325981366  | 0 | N.A. | 0 |
| SNTB2       | 0,221531786 | 0,017059995  | 0 | N.A. | 0 |
| CXCL1       | 0,221420103 | 0,486064008  | 0 | N.A. | 0 |
| TSPO2       | 0,221330054 | 0,091017076  | 0 | N.A. | 0 |
| LA16c-380H5 | 0,221303828 | 0,084922413  | 0 | N.A. | 0 |
| TEX11       | 0,221228672 | -0,006278995 | 0 | N.A. | 0 |
| CTA-941F9.9 | 0,221155572 | 0,334516783  | 0 | N.A. | 0 |
| GCLC        | 0,2211143   | 0,203003275  | 0 | N.A. | 0 |
| TTC39B      | 0,221059565 | 0,193832721  | 0 | N.A. | 0 |
| SENP7       | 0,221042821 | 0,184126736  | 0 | N.A. | 0 |
| NR4A2       | 0,220887582 | 0,110930421  | 0 | N.A. | 0 |
| HIF1A-AS2   | 0,220818114 | -0,088374596 | 0 | N.A. | 0 |
| KB-1460A1.5 | 0,220808726 | 0,299730733  | 0 | N.A. | 0 |
| MXRA7       | 0,220736312 | 0,177800685  | 0 | N.A. | 0 |
| PTGS2       | 0,220716102 | 0,291319949  | 0 | N.A. | 0 |
| TAGLN       | 0,220697151 | -0,153463802 | 0 | N.A. | 0 |
| GPBP1L1     | 0,220671065 | 0,21350908   | 0 | N.A. | 0 |

|             |             |              |   |      |   |
|-------------|-------------|--------------|---|------|---|
| VEGFB       | 0,220665988 | 0,208320219  | 0 | N.A. | 0 |
| TMEM82      | 0,220630067 | 0,264743072  | 0 | N.A. | 0 |
| TP53INP1    | 0,220627233 | 0,229851346  | 0 | N.A. | 0 |
| CRCT1       | 0,22047864  | 0,330916878  | 0 | N.A. | 0 |
| TSPAN12     | 0,220369186 | 0,190796903  | 0 | N.A. | 0 |
| PIP         | 0,220367181 |              | 0 | N.A. | 0 |
| KIDINS220   | 0,220104003 | 0,506989652  | 0 | N.A. | 0 |
| LAMP2       | 0,219931514 | 0,228011725  | 0 | N.A. | 0 |
| RP1-142L7.8 | 0,219731638 | 0,013411814  | 0 | N.A. | 0 |
| LINC00628   | 0,219691294 | 0,170285162  | 0 | N.A. | 0 |
| PPP1R26     | 0,219678931 | 0,303374556  | 0 | N.A. | 0 |
| SEC24B      | 0,219585103 | 0,212453315  | 0 | N.A. | 0 |
| GLRA4       | 0,219557396 | 0,406689235  | 0 | N.A. | 0 |
| ZNF862      | 0,21949538  | -0,101902007 | 0 | N.A. | 0 |
| PUM2        | 0,219336959 | 0,180446449  | 0 | N.A. | 0 |
| CLIP4       | 0,219301716 | 0,13191909   | 0 | N.A. | 0 |
| PGBD5       | 0,219266549 | 0,517985643  | 0 | N.A. | 0 |
| CHMP4B      | 0,219217534 | 0,328380428  | 0 | N.A. | 0 |
| ATF3        | 0,219132385 | 0,188487303  | 0 | N.A. | 0 |
| B3GALT1     | 0,219119783 | 0,043487865  | 0 | N.A. | 0 |
| NPIP1B1     | 0,218859856 | 0,208317191  | 0 | N.A. | 0 |
| PLA2G10     | 0,218841117 | 0,34979062   | 1 | cl1  | 0 |
| RP11-963H4  | 0,218828439 | 0,192697081  | 0 | N.A. | 0 |
| RAB32       | 0,218815619 | 0,018011211  | 0 | N.A. | 0 |
| RUNX2       | 0,218791886 | 0,197798254  | 0 | N.A. | 0 |
| WWC3        | 0,218791414 | 0,202556887  | 0 | N.A. | 0 |
| MAN1B1      | 0,218768812 | 0,262082458  | 0 | N.A. | 0 |
| LRIF1       | 0,218758014 | 0,461991799  | 0 | N.A. | 0 |
| PMAIP1      | 0,218732867 | 0,258012232  | 0 | N.A. | 0 |
| RP11-1152H1 | 0,218729733 |              | 0 | N.A. | 0 |
| MTMR3       | 0,218678176 | 0,210777767  | 0 | N.A. | 0 |
| NR1I2       | 0,218201169 | 0,061931358  | 0 | N.A. | 0 |
| PPP1R15A    | 0,218193063 | 0,356105875  | 0 | N.A. | 0 |

|             |             |              |   |      |   |
|-------------|-------------|--------------|---|------|---|
| RP11-479G2  | 0,218060398 | -0,007320428 | 0 | N.A. | 0 |
| LINC00205   | 0,217930108 | -0,047758021 | 0 | N.A. | 0 |
| KLK5        | 0,217912167 |              | 1 | cls4 | 0 |
| CDC14B      | 0,217911505 | -0,004446775 | 0 | N.A. | 0 |
| ALDH1A3     | 0,217884714 | 0,16976811   | 0 | N.A. | 0 |
| NXN         | 0,217883447 | -0,011721806 | 0 | N.A. | 0 |
| CTXN1       | 0,217838619 | 0,344972544  | 0 | N.A. | 0 |
| CDC42BPG    | 0,217712689 | 0,373195843  | 0 | N.A. | 0 |
| RP11-65L3.2 | 0,217684838 | -0,004993334 | 0 | N.A. | 0 |
| ANKIB1      | 0,217568608 | 0,165516408  | 0 | N.A. | 0 |
| HYAL1       | 0,217469621 | 0,318138015  | 0 | N.A. | 0 |
| INO80D      | 0,217413627 | 0,317438654  | 0 | N.A. | 0 |
| RP5-1120P1  | 0,217351699 | 0,018027288  | 0 | N.A. | 0 |
| IL1R1       | 0,21734133  | 0,149774798  | 0 | N.A. | 0 |
| CTA-363E19. | 0,217298572 | 0,144259561  | 0 | N.A. | 0 |
| THBS1       | 0,217297038 | 0,257460645  | 0 | N.A. | 0 |
| MAPRE2      | 0,217292259 | 0,253735698  | 0 | N.A. | 0 |
| AC007292.3  | 0,217270906 | -0,106442308 | 0 | N.A. | 0 |
| RP11-164P12 | 0,217256161 | 0,338442097  | 0 | N.A. | 0 |
| ADHFE1      | 0,217186643 |              | 0 | N.A. | 0 |
| STX19       | 0,217063301 | 0,042020573  | 0 | N.A. | 0 |
| GOLT1B      | 0,217028231 | 0,262316195  | 0 | N.A. | 0 |
| UBXN10-AS1  | 0,217004834 | -0,236690497 | 0 | N.A. | 0 |
| FAM160B1    | 0,216912006 | 0,296319272  | 0 | N.A. | 0 |
| ADAR        | 0,216800892 | 0,44225527   | 0 | N.A. | 0 |
| ERGIC1      | 0,216642526 | 0,213573092  | 0 | N.A. | 0 |
| RP11-345F18 | 0,216558388 | 0,169833263  | 0 | N.A. | 0 |
| EHBP1       | 0,216445503 | 0,299338068  | 0 | N.A. | 0 |
| WFDC13      | 0,216411979 | -0,264942842 | 0 | N.A. | 0 |
| MSMO1       | 0,216340012 | 0,49127747   | 0 | N.A. | 0 |
| RP11-351J23 | 0,216023404 | 0,10037045   | 0 | N.A. | 0 |
| NOL4L       | 0,216011848 | 0,305254234  | 0 | N.A. | 0 |
| USP54       | 0,215979392 | 0,346405607  | 0 | N.A. | 0 |



|             |             |              |   |      |   |
|-------------|-------------|--------------|---|------|---|
| LRRC4       | 0,215978248 | 0,109155051  | 0 | N.A. | 0 |
| COPA        | 0,215942573 | 0,294952481  | 0 | N.A. | 0 |
| POLR2J3     | 0,215937338 | 0,325172791  | 0 | N.A. | 0 |
| KIF7        | 0,21591437  | 0,063824988  | 0 | N.A. | 0 |
| ENPP4       | 0,215907312 | 0,186005792  | 0 | N.A. | 0 |
| UPK3BL      | 0,215876593 |              | 0 | N.A. | 0 |
| TMEM259     | 0,215729957 | 0,662760017  | 0 | N.A. | 0 |
| RP11-336A10 | 0,215725565 | 0,062420431  | 0 | N.A. | 0 |
| SPINK6      | 0,21565679  |              | 0 | N.A. | 0 |
| PHLPP2      | 0,215555317 | 0,258482007  | 0 | N.A. | 0 |
| HHATL       | 0,215438949 | 0,364486685  | 0 | N.A. | 0 |
| SHISA4      | 0,215415203 | 0,332381811  | 0 | N.A. | 0 |
| RNF128      | 0,215395533 | 0,205638174  | 0 | N.A. | 0 |
| GBP4        | 0,21528677  | 0,086574047  | 0 | N.A. | 0 |
| CDS1        | 0,215248757 | 0,654756393  | 0 | N.A. | 0 |
| CDC42SE1    | 0,215220819 | -0,064605592 | 0 | N.A. | 0 |
| CC2D1B      | 0,215188031 | 0,198626374  | 0 | N.A. | 0 |
| EDEM3       | 0,215170015 | 0,427281744  | 0 | N.A. | 0 |
| SPRR1A      | 0,21514281  | 0,2674194    | 0 | N.A. | 0 |
| RP11-64C12. | 0,215083308 | -0,165121687 | 0 | N.A. | 0 |
| DICER1      | 0,215068186 | 0,34460176   | 0 | N.A. | 0 |
| MOB3C       | 0,215045403 | 0,34239912   | 0 | N.A. | 0 |
| BTBD19      | 0,215000909 | 0,3163065    | 0 | N.A. | 0 |
| KDSR        | 0,214935591 | 0,151357801  | 0 | N.A. | 0 |
| RP5-1158E12 | 0,21491263  | 0,129046224  | 0 | N.A. | 0 |
| DHX32       | 0,214888002 | 0,30249191   | 0 | N.A. | 0 |
| PTPN23      | 0,214840699 | 0,139543565  | 0 | N.A. | 0 |
| C1orf228    | 0,214745775 | 0,135167781  | 0 | N.A. | 0 |
| MAU2        | 0,214688643 | 0,20354822   | 0 | N.A. | 0 |
| LINC00657   | 0,214645431 | 0,22810502   | 0 | N.A. | 0 |
| TMEM150B    | 0,21439835  | 0,521939357  | 0 | N.A. | 0 |
| DFNA5       | 0,214319033 |              | 0 | N.A. | 0 |
| FKBP2       | 0,214272578 | 0,20560262   | 0 | N.A. | 0 |

|             |             |              |   |      |   |
|-------------|-------------|--------------|---|------|---|
| MTRNR2L6    | 0,214208383 | 0,068157885  | 0 | N.A. | 0 |
| ZMYM6       | 0,21410267  | -0,127461063 | 0 | N.A. | 0 |
| KISS1       | 0,21410155  | 0,45217493   | 0 | N.A. | 0 |
| EXOC5       | 0,214084564 | 0,080636504  | 0 | N.A. | 0 |
| CTD-3252C9. | 0,214063514 | 0,559548004  | 0 | N.A. | 0 |
| ATHL1       | 0,214057577 | 0,399106571  | 0 | N.A. | 0 |
| VAMP2       | 0,214027769 | 0,309223821  | 0 | N.A. | 0 |
| TGM1        | 0,213890422 | -0,067401755 | 0 | N.A. | 0 |
| RAI14       | 0,213829938 | 0,334103444  | 0 | N.A. | 0 |
| CH507-42P1  | 0,213778497 | 0,193368375  | 0 | N.A. | 0 |
| FARP1-AS1   | 0,213585739 | 0,226100191  | 0 | N.A. | 0 |
| EMP3        | 0,213484603 | 0,216929312  | 0 | N.A. | 0 |
| MID2        | 0,213462578 | 0,121094367  | 0 | N.A. | 0 |
| TBC1D22A    | 0,213458377 | 0,470598322  | 0 | N.A. | 0 |
| HLA-DRB1    | 0,213429895 | -0,262061867 | 0 | N.A. | 0 |
| AC104654.1  | 0,213389891 | 0,120342371  | 0 | N.A. | 0 |
| ZFYVE26     | 0,213342302 | 0,143430204  | 0 | N.A. | 0 |
| KIFC2       | 0,213202266 | 0,350916867  | 0 | N.A. | 0 |
| AC058791.1  | 0,213157447 | -0,005892036 | 0 | N.A. | 0 |
| WWC2        | 0,213050512 | 0,2924548    | 0 | N.A. | 0 |
| SREBF2      | 0,213045787 | 0,454789893  | 0 | N.A. | 0 |
| LINC00086   | 0,213020952 | -0,025892689 | 0 | N.A. | 0 |
| TMEM191C    | 0,212979964 | 0,268577546  | 0 | N.A. | 0 |
| CCL8        | 0,212970068 |              | 0 | N.A. | 0 |
| SLC2A10     | 0,212967736 | 0,255096968  | 0 | N.A. | 0 |
| DOPEY2      | 0,212917863 | 0,34159137   | 0 | N.A. | 0 |
| CBFB        | 0,212915885 | 0,071939285  | 0 | N.A. | 0 |
| TMEM256     | 0,212669149 | -0,142801739 | 0 | N.A. | 0 |
| BMS1P14     | 0,21251583  | 0,281279608  | 0 | N.A. | 0 |
| RRAGD       | 0,212489307 | 0,016453635  | 0 | N.A. | 0 |
| GBP5        | 0,212473182 |              | 0 | N.A. | 0 |
| ADCY10      | 0,212437577 | 0,129534511  | 0 | N.A. | 0 |
| LRRFIP2     | 0,2122675   | 0,180399745  | 0 | N.A. | 0 |

|              |             |              |   |      |   |
|--------------|-------------|--------------|---|------|---|
| RP11-103J8.1 | 0,212094654 | 0,183377468  | 0 | N.A. | 0 |
| RAD9A        | 0,211908059 | 0,415584612  | 0 | N.A. | 0 |
| DDX58        | 0,211904973 | 0,366493363  | 0 | N.A. | 0 |
| ZBTB20-AS2   | 0,211842643 | 0,009907413  | 0 | N.A. | 0 |
| ZNF365       | 0,211783054 | 0,172018135  | 0 | N.A. | 0 |
| JAK3         | 0,211742007 | 0,076299189  | 0 | N.A. | 0 |
| TEAD3        | 0,211735803 | 0,367648467  | 0 | N.A. | 0 |
| MAST4        | 0,211656877 | 0,237294167  | 0 | N.A. | 0 |
| SNAP23       | 0,211645622 | 0,114303988  | 0 | N.A. | 0 |
| SLC46A3      | 0,211555848 | 0,339724519  | 0 | N.A. | 0 |
| R3HDM2       | 0,211450031 | -0,062961671 | 0 | N.A. | 0 |
| ARIH1        | 0,211173606 | 0,340941054  | 0 | N.A. | 0 |
| ZNF579       | 0,211158793 | -0,167668054 | 0 | N.A. | 0 |
| ZBTB46       | 0,211005116 | 0,361759291  | 0 | N.A. | 0 |
| AXIN1        | 0,210962126 | 0,275000021  | 0 | N.A. | 0 |
| PPP1R3G      | 0,210938101 | 0,440797707  | 0 | N.A. | 0 |
| JMJD1C-AS1   | 0,21079297  | 0,20107381   | 0 | N.A. | 0 |
| SCARF1       | 0,210744013 | 0,355839783  | 0 | N.A. | 0 |
| KRCC1        | 0,210552564 | 0,177530797  | 0 | N.A. | 0 |
| GALC         | 0,210551785 | 0,403094699  | 0 | N.A. | 0 |
| PPP1R3B      | 0,210520095 | 0,236848593  | 0 | N.A. | 0 |
| AP5Z1        | 0,21046666  | 0,386213947  | 0 | N.A. | 0 |
| C5orf42      | 0,21043637  | 0,181159392  | 0 | N.A. | 0 |
| GPA33        | 0,210429251 | 0,31912343   | 0 | N.A. | 0 |
| AC024560.2   | 0,210416901 | 0,255776417  | 0 | N.A. | 0 |
| PLEKHD1      | 0,210270223 | -0,0008595   | 0 | N.A. | 0 |
| ACSF2        | 0,210245237 | 0,17643958   | 0 | N.A. | 0 |
| SUN3         | 0,210185417 | 0,21770653   | 0 | N.A. | 0 |
| TMEM144      | 0,210160562 | 0,182920062  | 0 | N.A. | 0 |
| KIF9-AS1     | 0,210107299 | 0,030574557  | 0 | N.A. | 0 |
| HTR3A        | 0,209976021 |              | 0 | N.A. | 0 |
| LCAT         | 0,209948711 | 0,454455692  | 0 | N.A. | 0 |
| MTMR10       | 0,209940546 | 0,062020788  | 0 | N.A. | 0 |

|             |             |              |   |      |   |
|-------------|-------------|--------------|---|------|---|
| XIST        | 0,209883634 | 0,232539632  | 0 | N.A. | 0 |
| DSG4        | 0,209849383 | 0,257406828  | 0 | N.A. | 0 |
| ADRB1       | 0,209825505 | 0,002110921  | 0 | N.A. | 0 |
| ACSL3       | 0,209822547 | 0,402267853  | 0 | N.A. | 0 |
| LEMD3       | 0,209808987 | 0,301772299  | 0 | N.A. | 0 |
| NF1         | 0,209592885 | 0,401551054  | 0 | N.A. | 0 |
| KDM6B       | 0,209577297 | 0,249318328  | 0 | N.A. | 0 |
| CDC37L1     | 0,209420256 | 0,093662531  | 0 | N.A. | 0 |
| AFF1        | 0,20941801  | 0,191105171  | 0 | N.A. | 0 |
| FZR1        | 0,209410616 | 0,353647477  | 0 | N.A. | 0 |
| RP11-164P12 | 0,209315699 | 0,045330466  | 0 | N.A. | 0 |
| MAP4        | 0,209313745 | 0,173130783  | 0 | N.A. | 0 |
| LINC01291   | 0,209294416 | 0,212642554  | 0 | N.A. | 0 |
| MFSD7       | 0,209285008 | 0,058773654  | 0 | N.A. | 0 |
| DNAJC3      | 0,209221878 | 0,473244038  | 0 | N.A. | 0 |
| DAG1        | 0,209175042 | 0,407149766  | 0 | N.A. | 0 |
| ZNF688      | 0,209049471 | -0,012286094 | 0 | N.A. | 0 |
| VNN2        | 0,209009177 | -0,060095748 | 0 | N.A. | 0 |
| SMAP1       | 0,208991718 | 0,356586669  | 0 | N.A. | 0 |
| RANBP10     | 0,208837022 | 0,485874494  | 0 | N.A. | 0 |
| NMUR2       | 0,208792333 | 0,161763975  | 0 | N.A. | 0 |
| PRKCZ       | 0,208789595 | 0,450335618  | 0 | N.A. | 0 |
| RLF         | 0,208741158 | 0,133737028  | 0 | N.A. | 0 |
| SNX30       | 0,208718625 | 0,221523634  | 0 | N.A. | 0 |
| ACTR2       | 0,208559911 | 0,272937728  | 0 | N.A. | 0 |
| AK8         | 0,208469837 | 0,370542463  | 0 | N.A. | 0 |
| SNX19       | 0,208344752 | -0,000286766 | 0 | N.A. | 0 |
| CSNK1G3     | 0,208344456 | 0,348187786  | 0 | N.A. | 0 |
| CLIC6       | 0,208324296 |              | 0 | N.A. | 0 |
| SLC6A12     | 0,208246547 | 0,231129725  | 0 | N.A. | 0 |
| PARD3       | 0,208205522 | 0,244985983  | 0 | N.A. | 0 |
| OSBPL11     | 0,208195007 | 0,05339151   | 0 | N.A. | 0 |
| RNF152      | 0,208187718 | 0,133290073  | 0 | N.A. | 0 |

|              |             |              |   |      |   |
|--------------|-------------|--------------|---|------|---|
| LRRC19       | 0,208159154 | 0,034391504  | 0 | N.A. | 0 |
| TMEM86B      | 0,208075219 | 0,313059462  | 0 | N.A. | 0 |
| ARNTL        | 0,208044918 | 0,349787647  | 0 | N.A. | 0 |
| PCGF3        | 0,207721818 | 0,229744616  | 0 | N.A. | 0 |
| LARP4B       | 0,207587577 | 0,324875892  | 0 | N.A. | 0 |
| IGF2R        | 0,207484952 | 0,446030463  | 0 | N.A. | 0 |
| DNM3         | 0,207469176 | 0,260455235  | 0 | N.A. | 0 |
| CTD-2377D2   | 0,207399034 | 0,457292755  | 0 | N.A. | 0 |
| BTN3A1       | 0,207385049 | 0,110983795  | 0 | N.A. | 0 |
| ZNF398       | 0,207315422 | -0,016921457 | 0 | N.A. | 0 |
| FLRT3        | 0,207303028 | 0,298579561  | 0 | N.A. | 0 |
| ELF3         | 0,207290727 | 0,601706605  | 0 | N.A. | 0 |
| ALG2         | 0,207259505 | 0,233008873  | 0 | N.A. | 0 |
| TAOK1        | 0,207158794 | 0,376407995  | 0 | N.A. | 0 |
| TFAP2A-AS1   | 0,20705996  | 0,019654995  | 0 | N.A. | 0 |
| PANX1        | 0,207046058 | -0,234836786 | 0 | N.A. | 0 |
| C16orf52     | 0,206957993 | 0,056511233  | 0 | N.A. | 0 |
| PSORS1C2     | 0,206945291 | 0,054770899  | 0 | N.A. | 0 |
| PARP10       | 0,206929118 | 0,094707388  | 0 | N.A. | 0 |
| TBC1D23      | 0,206902945 | 0,135073488  | 0 | N.A. | 0 |
| RBAK         | 0,206831029 | -0,071212915 | 0 | N.A. | 0 |
| ZNF865       | 0,206783124 | 0,139436481  | 0 | N.A. | 0 |
| PPP1R12B     | 0,206680515 | 0,29008159   | 0 | N.A. | 0 |
| B3GALT5-AS1  | 0,206675915 | 0,221365843  | 0 | N.A. | 0 |
| RP11-1017G2  | 0,206528857 | -0,134688817 | 0 | N.A. | 0 |
| FBXW11       | 0,206486715 | 0,136992047  | 0 | N.A. | 0 |
| PTPN14       | 0,206485258 | 0,389726924  | 0 | N.A. | 0 |
| MUL1         | 0,206467122 | 0,126449441  | 0 | N.A. | 0 |
| GMIP         | 0,206462424 | 0,374654488  | 0 | N.A. | 0 |
| SMEK1        | 0,206228775 | 0,270316852  | 0 | N.A. | 0 |
| TMEM51       | 0,206154974 | 0,417223378  | 0 | N.A. | 0 |
| SVIL-AS1     | 0,206140303 | 0,193245116  | 0 | N.A. | 0 |
| RP11-15111.3 | 0,206116792 | -0,03410022  | 0 | N.A. | 0 |

|             |             |              |   |      |   |
|-------------|-------------|--------------|---|------|---|
| SSH3        | 0,206105447 | 0,465957401  | 0 | N.A. | 0 |
| ZNF91       | 0,206102758 | 0,330806671  | 0 | N.A. | 0 |
| RAB3GAP2    | 0,20608266  | 0,263775964  | 0 | N.A. | 0 |
| PLSCR4      | 0,205991977 | 0,0116747    | 0 | N.A. | 0 |
| OBFC1       | 0,205967648 | 0,144378001  | 0 | N.A. | 0 |
| ERAP1       | 0,205956102 | 0,045193175  | 0 | N.A. | 0 |
| CLCN7       | 0,205938016 | 0,150830824  | 0 | N.A. | 0 |
| CLLU10S     | 0,205862355 |              | 0 | N.A. | 0 |
| PRKCA       | 0,205666853 | 0,282055855  | 0 | N.A. | 0 |
| GATAD2B     | 0,205537939 | 0,130160118  | 0 | N.A. | 0 |
| EVI2B       | 0,205534431 | 0,162978854  | 0 | N.A. | 0 |
| SRMS        | 0,205447288 | 0,239821758  | 0 | N.A. | 0 |
| SI          | 0,20542566  | 0,338702834  | 0 | N.A. | 0 |
| C14orf37    | 0,205391385 | 0,188915361  | 0 | N.A. | 0 |
| LRP5        | 0,205354374 | 0,43749352   | 0 | N.A. | 0 |
| DOCK6       | 0,205339871 | 0,397124056  | 0 | N.A. | 0 |
| ALPK3       | 0,205314317 | 0,055205422  | 0 | N.A. | 0 |
| AC116366.6  | 0,2053086   |              | 0 | N.A. | 0 |
| RP11-65L3.4 | 0,205030998 | -0,063223559 | 0 | N.A. | 0 |
| AL022341.3  | 0,204948146 | -0,112895106 | 0 | N.A. | 0 |
| RP11-783K16 | 0,204888184 | -0,060514202 | 0 | N.A. | 0 |
| OSBPL1A     | 0,20466862  | 0,451004463  | 0 | N.A. | 0 |
| TOX3        | 0,204660648 | 0,365558325  | 0 | N.A. | 0 |
| KPNA1       | 0,204650266 | 0,025388254  | 0 | N.A. | 0 |
| RIMS3       | 0,204468416 | 0,328899369  | 0 | N.A. | 0 |
| CCDC146     | 0,204396403 | 0,093261325  | 0 | N.A. | 0 |
| ATP7A       | 0,204349426 | 0,081950942  | 0 | N.A. | 0 |
| WBP5        | 0,204320233 | -0,128005142 | 0 | N.A. | 0 |
| HECTD3      | 0,204184721 | 0,377655556  | 0 | N.A. | 0 |
| LCN12       | 0,203888741 | 0,284333662  | 0 | N.A. | 0 |
| LYN         | 0,203832037 | 0,344475827  | 0 | N.A. | 0 |
| RP11-24F11. | 0,20376793  | 0,026795062  | 0 | N.A. | 0 |
| POFUT2      | 0,203753326 | 0,172515817  | 0 | N.A. | 0 |

|             |             |              |   |      |   |
|-------------|-------------|--------------|---|------|---|
| NAALADL2    | 0,203581974 | 0,077431389  | 0 | N.A. | 0 |
| SIRPG       | 0,203508027 | -0,128046173 | 0 | N.A. | 0 |
| RP11-1017G2 | 0,203487999 | 0,079472595  | 0 | N.A. | 0 |
| ADNP2       | 0,203459117 | 0,180395841  | 0 | N.A. | 0 |
| OTUD5       | 0,203442415 | 0,154451272  | 0 | N.A. | 0 |
| GAL3ST1     | 0,203435228 | 0,171839901  | 0 | N.A. | 0 |
| BAZ2B       | 0,203375545 | 0,446967338  | 0 | N.A. | 0 |
| ZBTB7C      | 0,203334824 | 0,111640592  | 0 | N.A. | 0 |
| SLAMF9      | 0,203305487 | 0,196409076  | 0 | N.A. | 0 |
| HTT         | 0,203262379 | 0,296110191  | 0 | N.A. | 0 |
| COL14A1     | 0,20321869  | -0,113799011 | 0 | N.A. | 0 |
| BIRC6       | 0,203172821 | 0,347800839  | 0 | N.A. | 0 |
| BIK         | 0,203011809 | 0,273715846  | 0 | N.A. | 0 |
| BEND7       | 0,202935783 | 0,197884279  | 0 | N.A. | 0 |
| PUM1        | 0,202900607 | 0,339306292  | 0 | N.A. | 0 |
| FAM95B1     | 0,202827072 | -0,008324852 | 0 | N.A. | 0 |
| IFFO2       | 0,202732832 | 0,260368043  | 0 | N.A. | 0 |
| PATL1       | 0,202732372 | 0,295770224  | 0 | N.A. | 0 |
| ARHGAP32    | 0,202711565 | 0,256964294  | 0 | N.A. | 0 |
| SLAMF8      | 0,202587544 | -0,062755046 | 0 | N.A. | 0 |
| COBLL1      | 0,202554351 | 0,151349497  | 0 | N.A. | 0 |
| SLC1A3      | 0,202551164 | 0,043986681  | 0 | N.A. | 0 |
| SC5D        | 0,202514072 | -0,22501179  | 0 | N.A. | 0 |
| RAB35       | 0,20249722  | 0,203269369  | 0 | N.A. | 0 |
| MAGI3       | 0,202435937 | 0,504353391  | 0 | N.A. | 0 |
| LINC01551   | 0,202384572 | 0,083739774  | 0 | N.A. | 0 |
| CCDC91      | 0,202297559 | 0,327999299  | 0 | N.A. | 0 |
| ZNF655      | 0,202195562 | 0,183612692  | 0 | N.A. | 0 |
| COG6        | 0,202152913 | 0,305858461  | 0 | N.A. | 0 |
| STK11       | 0,202112735 | 0,254455143  | 0 | N.A. | 0 |
| CDRT1       | 0,202022822 | 0,258236518  | 0 | N.A. | 0 |
| SLC7A9      | 0,201976311 | 0,134996735  | 0 | N.A. | 0 |
| DPP9        | 0,201937759 | 0,355219985  | 0 | N.A. | 0 |

|             |             |              |   |      |   |
|-------------|-------------|--------------|---|------|---|
| KIAA1033    | 0,201911819 | 0,34178834   | 0 | N.A. | 0 |
| EVA1C       | 0,201899307 | 0,326415152  | 0 | N.A. | 0 |
| MSR1        | 0,201888325 | -0,017801985 | 0 | N.A. | 0 |
| EGLN2       | 0,20187744  | 0,132220478  | 0 | N.A. | 0 |
| ZNF556      | 0,201767372 | 0,099564762  | 0 | N.A. | 0 |
| AC023590.1  | 0,201648026 | 0,030202259  | 0 | N.A. | 0 |
| AQP11       | 0,20152393  | 0,219513715  | 0 | N.A. | 0 |
| CCRN4L      | 0,201518894 | 0,233677728  | 0 | N.A. | 0 |
| RP11-503E24 | 0,201481252 | 0,264035607  | 0 | N.A. | 0 |
| ERICD       | 0,201453295 |              | 0 | N.A. | 0 |
| ALDOA       | 0,20135613  | 0,200430767  | 0 | N.A. | 0 |
| GUCY2C      | 0,201318987 | 0,203660849  | 0 | N.A. | 0 |
| NKAIN1      | 0,201291734 |              | 0 | N.A. | 0 |
| FOXN3       | 0,201195736 | 0,244331656  | 0 | N.A. | 0 |
| MGAT5       | 0,201173113 | 0,166504847  | 0 | N.A. | 0 |
| AC010642.1  | 0,201115955 | -0,128419193 | 0 | N.A. | 0 |
| RP11-181E10 | 0,20106777  |              | 0 | N.A. | 0 |
| IRF2        | 0,200850815 | 0,16009975   | 0 | N.A. | 0 |
| CHMP4C      | 0,200810446 | 0,375504815  | 0 | N.A. | 0 |
| KLC1        | 0,200563631 | 0,388565427  | 0 | N.A. | 0 |
| MPP7        | 0,200553169 | 0,182957194  | 0 | N.A. | 0 |
| GPR137      | 0,200532148 | 0,149455465  | 0 | N.A. | 0 |
| LRRC23      | 0,200438913 | -0,323135784 | 0 | N.A. | 0 |
| ZC3H6       | 0,200413494 | 0,226212961  | 0 | N.A. | 0 |
| WARS        | 0,200368552 | -0,055676022 | 0 | N.A. | 0 |
| RP11-15A1.7 | 0,200328008 | 0,018713396  | 0 | N.A. | 0 |
| IL13RA1     | 0,200310328 | 0,546469175  | 0 | N.A. | 0 |
| KCNQ1OT1    | 0,200265855 | 0,468345745  | 0 | N.A. | 0 |
| CDC42       | 0,200194785 | -0,050455448 | 0 | N.A. | 0 |
| TSC1        | 0,200179801 | 0,103330496  | 0 | N.A. | 0 |
| ACADVL      | 0,200156364 | 0,311694276  | 0 | N.A. | 0 |
| IFIH1       | 0,200018141 | 0,446531251  | 0 | N.A. | 0 |
| JSRP1       | 0,199908287 | 0,507189526  | 0 | N.A. | 0 |



|             |             |              |   |      |   |
|-------------|-------------|--------------|---|------|---|
| BMP2K       | 0,199836103 | 0,110333273  | 0 | N.A. | 0 |
| NR2F6       | 0,1998017   | 0,531703995  | 0 | N.A. | 0 |
| RP11-124N14 | 0,199777362 | -0,084786397 | 0 | N.A. | 0 |
| SUSD1       | 0,199770983 | 0,157708605  | 0 | N.A. | 0 |
| VPS41       | 0,199690577 | -0,070734268 | 0 | N.A. | 0 |
| SLC50A1     | 0,199622463 | 0,328841079  | 0 | N.A. | 0 |
| CARHSP1     | 0,19947022  | 0,186289641  | 0 | N.A. | 0 |
| GNAL        | 0,199442087 | -0,302917571 | 0 | N.A. | 0 |
| AC073283.4  | 0,199432899 | -0,083055656 | 0 | N.A. | 0 |
| CLASP1      | 0,199319668 | 0,152358143  | 0 | N.A. | 0 |
| GPR157      | 0,199203132 | 0,108904422  | 0 | N.A. | 0 |
| NAV2        | 0,199194872 | -0,094800406 | 0 | N.A. | 0 |
| RP11-73M7.1 | 0,199156308 | -0,120526179 | 0 | N.A. | 0 |
| AC093642.3  | 0,19912555  | 0,150675228  | 0 | N.A. | 0 |
| MAN1A2      | 0,199118549 | 0,417814487  | 0 | N.A. | 0 |
| EPN1        | 0,199116119 | 0,585877944  | 0 | N.A. | 0 |
| AC061992.2  | 0,199025283 | 0,383614409  | 0 | N.A. | 0 |
| LRIG2       | 0,19894672  | 0,203214872  | 0 | N.A. | 0 |
| LINC01137   | 0,198900027 | 0,0747961    | 0 | N.A. | 0 |
| LGR6        | 0,198853686 | 0,240046382  | 0 | N.A. | 0 |
| ATG101      | 0,198671575 | 0,007947001  | 0 | N.A. | 0 |
| RP11-399E6. | 0,198656762 | 0,351906386  | 0 | N.A. | 0 |
| NR2E3       | 0,198642429 |              | 0 | N.A. | 0 |
| PRKAB2      | 0,198593276 | 0,241287276  | 0 | N.A. | 0 |
| CAMTA2      | 0,198574814 | 0,275145005  | 0 | N.A. | 0 |
| GPR132      | 0,198566555 | 0,126923482  | 0 | N.A. | 0 |
| SPECC1      | 0,19849826  | 0,106377728  | 0 | N.A. | 0 |
| VLDLR-AS1   | 0,198467059 | 0,137953179  | 0 | N.A. | 0 |
| INPPL1      | 0,198393024 | 0,042112104  | 0 | N.A. | 0 |
| EGOT        | 0,198321674 | 0,237220524  | 0 | N.A. | 0 |
| TBC1D17     | 0,198210049 | 0,140004588  | 0 | N.A. | 0 |
| STK17B      | 0,198127111 | 0,08598319   | 0 | N.A. | 0 |
| FAM160B2    | 0,19812555  | 0,440200946  | 0 | N.A. | 0 |

|              |             |              |   |      |   |
|--------------|-------------|--------------|---|------|---|
| CYP24A1      | 0,198111604 | 0,362305242  | 0 | N.A. | 0 |
| SCNN1D       | 0,197889615 | 0,303916598  | 0 | N.A. | 0 |
| ACE          | 0,197741595 | 0,261750087  | 0 | N.A. | 0 |
| AC016735.2   | 0,197659856 | 0,274318525  | 0 | N.A. | 0 |
| RP11-78C3.1  | 0,197602184 | 0,124083343  | 0 | N.A. | 0 |
| PLA2R1       | 0,197479783 | 0,419228531  | 0 | N.A. | 0 |
| YPEL2        | 0,197479574 | 0,259419682  | 0 | N.A. | 0 |
| RP3-508I15.2 | 0,197456768 | 0,417695406  | 0 | N.A. | 0 |
| EPS15        | 0,197410074 | 0,080480888  | 0 | N.A. | 0 |
| CLCN6        | 0,197381575 | 0,210811406  | 0 | N.A. | 0 |
| RP11-432I5.6 | 0,197357409 |              | 0 | N.A. | 0 |
| TNF          | 0,197324301 | 0,397302618  | 0 | N.A. | 0 |
| RP11-430H10  | 0,197249093 |              | 0 | N.A. | 0 |
| QPCT         | 0,197111542 | 0,18437455   | 0 | N.A. | 0 |
| HOOK2        | 0,197009617 | 0,525246441  | 0 | N.A. | 0 |
| DENND1A      | 0,196981689 | -0,076577163 | 0 | N.A. | 0 |
| EDF1         | 0,196981205 | 0,176955434  | 0 | N.A. | 0 |
| CBLN3        | 0,196964816 | 0,187652652  | 0 | N.A. | 0 |
| CPEB1-AS1    | 0,196916365 | -0,11468637  | 0 | N.A. | 0 |
| CRELD1       | 0,196899399 | 0,167119168  | 0 | N.A. | 0 |
| TGFB1        | 0,196865654 | 0,086276346  | 0 | N.A. | 0 |
| PLEKHO2      | 0,196834904 | -0,032405043 | 0 | N.A. | 0 |
| UVSSA        | 0,196825266 | 0,185345503  | 0 | N.A. | 0 |
| LAD1         | 0,196817045 | 0,471367998  | 0 | N.A. | 0 |
| SH3BP4       | 0,19681514  | 0,393471698  | 0 | N.A. | 0 |
| FOXO4        | 0,196747196 | 0,01979061   | 0 | N.A. | 0 |
| TMEM204      | 0,196706343 | -0,198968058 | 0 | N.A. | 0 |
| LATS2-AS1    | 0,196622198 | 0,062777842  | 0 | N.A. | 0 |
| RP11-701P16  | 0,196602172 |              | 0 | N.A. | 0 |
| KBTBD11      | 0,196439168 | 0,004752443  | 0 | N.A. | 0 |
| SKI          | 0,196436354 | 0,190789216  | 0 | N.A. | 0 |
| RP11-367N14  | 0,196356047 | 0,252622771  | 0 | N.A. | 0 |
| TMEM185A     | 0,196267981 | 0,292010518  | 0 | N.A. | 0 |

|             |             |              |   |      |   |
|-------------|-------------|--------------|---|------|---|
| PCYT1A      | 0,195982958 | 0,23913671   | 0 | N.A. | 0 |
| HAVCR2      | 0,195928416 | -0,263036999 | 0 | N.A. | 0 |
| C17orf78    | 0,195794864 | 0,072791177  | 0 | N.A. | 0 |
| DISP2       | 0,195659959 | 0,429198275  | 1 | none | 0 |
| MIR503HG    | 0,195644219 | 0,011080126  | 0 | N.A. | 0 |
| HIGD1A      | 0,195597056 | 0,252023994  | 0 | N.A. | 0 |
| TMCO3       | 0,195581877 | 0,445027877  | 0 | N.A. | 0 |
| NCKAP5      | 0,19548832  | 0,364869234  | 0 | N.A. | 0 |
| PANX2       | 0,195433079 | 0,0307049    | 0 | N.A. | 0 |
| IL17RC      | 0,195323779 | 0,429217288  | 0 | N.A. | 0 |
| RABGAP1L    | 0,195320167 | 0,218300121  | 0 | N.A. | 0 |
| ATG9A       | 0,195297559 | 0,342519824  | 0 | N.A. | 0 |
| RP11-502H18 | 0,195286096 | 0,186222427  | 0 | N.A. | 0 |
| CCR3        | 0,195276001 | 0,249789396  | 0 | N.A. | 0 |
| RAET1E      | 0,195216332 | 0,196291166  | 0 | N.A. | 0 |
| GABRP       | 0,195161086 | -0,041163297 | 1 | cl2  | 0 |
| BCL6        | 0,195075721 | 0,390436028  | 0 | N.A. | 0 |
| RP11-1143G9 | 0,195059927 | -0,171425823 | 0 | N.A. | 0 |
| SPON2       | 0,195006517 | 0,075639516  | 0 | N.A. | 0 |
| CCDC13      | 0,194962887 | 0,320495717  | 0 | N.A. | 0 |
| IGF1R       | 0,19489092  | 0,419955449  | 0 | N.A. | 0 |
| RP1-140K8.5 | 0,194840378 | 0,364878277  | 0 | N.A. | 0 |
| CAPN15      | 0,194732473 | 0,155685219  | 0 | N.A. | 0 |
| SCNN1B      | 0,194645985 | 0,076287366  | 0 | N.A. | 0 |
| TNC         | 0,194482763 | -0,054453665 | 0 | N.A. | 0 |
| STX2        | 0,194351472 | 0,319034277  | 0 | N.A. | 0 |
| SPTY2D1     | 0,194350949 | 0,391450377  | 0 | N.A. | 0 |
| FABP1       | 0,194326221 | -0,056783746 | 0 | N.A. | 0 |
| RP11-264B17 | 0,194314341 |              | 0 | N.A. | 0 |
| COL4A3BP    | 0,194304847 | 0,144427155  | 0 | N.A. | 0 |
| ENC1        | 0,194301997 | 0,325770653  | 0 | N.A. | 0 |
| PEAK1       | 0,194124823 | 0,184590732  | 0 | N.A. | 0 |
| MAPK9       | 0,194084961 | 0,203252077  | 0 | N.A. | 0 |

|             |             |              |   |      |   |
|-------------|-------------|--------------|---|------|---|
| C6orf62     | 0,194051235 | 0,259824303  | 0 | N.A. | 0 |
| ITGB7       | 0,193886273 | 0,177788972  | 0 | N.A. | 0 |
| PALM        | 0,193870431 |              | 0 | N.A. | 0 |
| DRAM2       | 0,193611546 | 0,097611843  | 0 | N.A. | 0 |
| SPECC1L     | 0,193603098 | 0,081534164  | 0 | N.A. | 0 |
| KMO         | 0,193543209 | 0,116964002  | 0 | N.A. | 0 |
| ZNF281      | 0,193531913 | 0,285399855  | 0 | N.A. | 0 |
| TM7SF2      | 0,193475946 | 0,225796874  | 0 | N.A. | 0 |
| RP11-12601  | 0,1934488   | 0,027892163  | 0 | N.A. | 0 |
| DMRTA1      | 0,19344216  | -0,026863219 | 0 | N.A. | 0 |
| FADS6       | 0,19343427  | 0,334074417  | 0 | N.A. | 0 |
| AGO4        | 0,193425873 | 0,187022652  | 0 | N.A. | 0 |
| ZNF611      | 0,193420871 | 0,059214717  | 0 | N.A. | 0 |
| PAQR7       | 0,19337607  | 0,201581501  | 0 | N.A. | 0 |
| TNFRSF11A   | 0,193334766 | 0,249977198  | 0 | N.A. | 0 |
| ITCH-AS1    | 0,193237064 |              | 0 | N.A. | 0 |
| LINC00960   | 0,193229192 | -0,21062368  | 0 | N.A. | 0 |
| SLC39A9     | 0,192978866 | 0,303772406  | 0 | N.A. | 0 |
| ANXA8L1     | 0,192916433 | 0,362532567  | 0 | N.A. | 0 |
| C1orf177    | 0,192905338 | -0,191221057 | 0 | N.A. | 0 |
| TGFBR1      | 0,192788229 | 0,1714196    | 0 | N.A. | 0 |
| RP11-4104.2 | 0,192746735 |              | 0 | N.A. | 0 |
| PCBP4       | 0,192727512 | 0,26376695   | 0 | N.A. | 0 |
| GOLGA5      | 0,192724013 | 0,094303599  | 0 | N.A. | 0 |
| SYNGR3      | 0,192704131 | 0,41891769   | 0 | N.A. | 0 |
| RP11-800A18 | 0,192653336 | -0,070637413 | 0 | N.A. | 0 |
| RP11-119D9  | 0,192585491 | -0,125479217 | 0 | N.A. | 0 |
| TFPI2       | 0,192447078 | 0,005443537  | 0 | N.A. | 0 |
| LUZP1       | 0,192292473 | 0,191599818  | 0 | N.A. | 0 |
| SLC34A3     | 0,192236845 | 0,298638321  | 0 | N.A. | 0 |
| CD34        | 0,192220813 | -0,244211821 | 0 | N.A. | 0 |
| MYO9A       | 0,19214202  | 0,228518167  | 0 | N.A. | 0 |
| PEX11B      | 0,19206265  | -0,144699839 | 0 | N.A. | 0 |

|              |             |              |   |      |   |
|--------------|-------------|--------------|---|------|---|
| SOCS5        | 0,191883505 | 0,108003548  | 0 | N.A. | 0 |
| TLDC2        | 0,191858853 | 0,29590979   | 0 | N.A. | 0 |
| SLC11A1      | 0,191853708 | -0,257734828 | 0 | N.A. | 0 |
| ZNF430       | 0,191809338 | 0,447954317  | 0 | N.A. | 0 |
| PAQR3        | 0,191808088 | 0,199778966  | 0 | N.A. | 0 |
| ZNF224       | 0,191788131 | 0,25246198   | 0 | N.A. | 0 |
| ACP2         | 0,191727106 | 0,32106839   | 0 | N.A. | 0 |
| SLC45A2      | 0,19170343  |              | 0 | N.A. | 0 |
| SLCO4A1      | 0,191632308 | 0,292933328  | 0 | N.A. | 0 |
| RP11-48B3.3  | 0,191536307 | 0,072590542  | 0 | N.A. | 0 |
| CLTCL1       | 0,191521505 | 0,220769341  | 0 | N.A. | 0 |
| HIPK1        | 0,191362986 | 0,457826858  | 0 | N.A. | 0 |
| EVX1         | 0,191313892 | 0,167724411  | 0 | N.A. | 0 |
| RP11-212I21  | 0,191299291 | -0,002618707 | 0 | N.A. | 0 |
| NWD1         | 0,191180155 | 0,041196574  | 0 | N.A. | 0 |
| SLC2A1-AS1   | 0,191154003 | 0,18718078   | 0 | N.A. | 0 |
| MAPK7        | 0,191152431 | -0,153768661 | 0 | N.A. | 0 |
| RP11-290M5   | 0,19114082  |              | 0 | N.A. | 0 |
| NAA60        | 0,19111669  | 0,130957518  | 0 | N.A. | 0 |
| MAP1LC3A     | 0,191013754 | 0,26466483   | 0 | N.A. | 0 |
| HHIP-AS1     | 0,191006984 |              | 0 | N.A. | 0 |
| PSD3         | 0,190998274 | 0,166129629  | 0 | N.A. | 0 |
| NOMO1        | 0,190988724 | 0,262933254  | 0 | N.A. | 0 |
| RP11-20I23.7 | 0,190834126 |              | 0 | N.A. | 0 |
| RAB25        | 0,190824724 | 0,296884963  | 0 | N.A. | 0 |
| RP11-367G18  | 0,190798823 | 0,11477895   | 0 | N.A. | 0 |
| SPEN         | 0,190653004 | 0,354530345  | 0 | N.A. | 0 |
| CARS         | 0,190619311 | 0,344191179  | 0 | N.A. | 0 |
| SH3PXD2A     | 0,190605828 | 0,453452121  | 0 | N.A. | 0 |
| C1orf50      | 0,19054195  | 0,070039265  | 0 | N.A. | 0 |
| GMEB2        | 0,190388762 | 0,012639     | 0 | N.A. | 0 |
| CHFR         | 0,190315632 | 0,066699097  | 0 | N.A. | 0 |
| PHLDB2       | 0,190189822 | 0,573100138  | 0 | N.A. | 0 |

|             |             |              |   |      |   |
|-------------|-------------|--------------|---|------|---|
| PRDM6       | 0,190109636 | -0,220600048 | 0 | N.A. | 0 |
| FLJ22763    | 0,189956512 | 0,071819383  | 0 | N.A. | 0 |
| CHRNA10     | 0,189907827 | 0,045589773  | 0 | N.A. | 0 |
| KIAA1875    | 0,189810428 | 0,102898674  | 0 | N.A. | 0 |
| WI2-87327B8 | 0,189773264 | -0,04443539  | 0 | N.A. | 0 |
| RP11-93B14. | 0,189745906 | 0,169638062  | 0 | N.A. | 0 |
| CSF3R       | 0,189719223 | 0,224801866  | 0 | N.A. | 0 |
| CPT1B       | 0,18970587  | 0,166635203  | 0 | N.A. | 0 |
| EPHA10      | 0,189704536 | 0,346883593  | 0 | N.A. | 0 |
| TMEM200B    | 0,189665668 | 0,011327148  | 0 | N.A. | 0 |
| ILDR1       | 0,189584578 | 0,293952873  | 0 | N.A. | 0 |
| FSIP2       | 0,189526075 | 0,234005825  | 0 | N.A. | 0 |
| LA16c-431H6 | 0,189524782 | 0,158850859  | 0 | N.A. | 0 |
| FAM110C     | 0,189377154 | 0,004552687  | 0 | N.A. | 0 |
| TMEM214     | 0,189283039 | 0,532698634  | 0 | N.A. | 0 |
| RALGAPA2    | 0,189255002 | 0,185948422  | 0 | N.A. | 0 |
| TMEM236     | 0,189252474 | 0,268981706  | 0 | N.A. | 0 |
| JDP2        | 0,189215018 | -0,024549676 | 0 | N.A. | 0 |
| MIB2        | 0,189212413 | 0,326017449  | 0 | N.A. | 0 |
| GALNT2      | 0,189204934 | 0,320055377  | 0 | N.A. | 0 |
| MED29       | 0,189188205 | -0,035217126 | 0 | N.A. | 0 |
| NDST1       | 0,18906313  | 0,074563775  | 0 | N.A. | 0 |
| NTAN1       | 0,189007698 | -0,300952846 | 0 | N.A. | 0 |
| PPAP2A      | 0,188858022 | 0,349381721  | 0 | N.A. | 0 |
| POLR2A      | 0,188782892 | 0,43808144   | 0 | N.A. | 0 |
| PLB1        | 0,188717404 | 0,110875331  | 0 | N.A. | 0 |
| TFF3        | 0,188609982 | 0,265871073  | 0 | N.A. | 0 |
| UBA7        | 0,188548174 | 0,322660155  | 0 | N.A. | 0 |
| RIN3        | 0,188452127 | 0,055503366  | 0 | N.A. | 0 |
| MYL12A      | 0,188362497 | 0,199997631  | 0 | N.A. | 0 |
| ARHGEF6     | 0,18830355  | 0,042179586  | 0 | N.A. | 0 |
| ZNF75D      | 0,188293372 | 0,068549096  | 0 | N.A. | 0 |
| FGF2        | 0,188282076 | 0,349306779  | 0 | N.A. | 0 |

|              |             |              |   |      |   |
|--------------|-------------|--------------|---|------|---|
| RP11-96D1.1  | 0,18826604  | 0,179981841  | 0 | N.A. | 0 |
| RP11-496I9.1 | 0,188145585 | 0,22857804   | 0 | N.A. | 0 |
| ARHGEF28     | 0,188028215 | 0,085592065  | 0 | N.A. | 0 |
| STARD3       | 0,187968275 | -0,041523282 | 0 | N.A. | 0 |
| AC026202.3   | 0,187800921 | 0,033679502  | 0 | N.A. | 0 |
| UCKL1-AS1    | 0,187748713 | 0,148216955  | 0 | N.A. | 0 |
| RBM24        | 0,187606275 | 0,246690374  | 0 | N.A. | 0 |
| GRAMD4       | 0,18749335  | 0,486563336  | 0 | N.A. | 0 |
| ARHGAP5-AS   | 0,18732337  | 0,075456476  | 0 | N.A. | 0 |
| KRT81        | 0,187306408 | -0,225765573 | 0 | N.A. | 0 |
| NPR2         | 0,187228539 | 0,083114843  | 0 | N.A. | 0 |
| RILPL1       | 0,187162762 | 0,132828607  | 0 | N.A. | 0 |
| RP11-77H9.5  | 0,187158697 |              | 0 | N.A. | 0 |
| TPSB2        | 0,187113798 | -0,090018494 | 0 | N.A. | 0 |
| FAM102B      | 0,187085152 | -0,063580061 | 0 | N.A. | 0 |
| KMT2E        | 0,186997121 | 0,317666103  | 0 | N.A. | 0 |
| ADCY6        | 0,186862384 | 0,237668062  | 0 | N.A. | 0 |
| RNMT         | 0,186856197 | 0,41115688   | 0 | N.A. | 0 |
| KCNE3        | 0,186730592 | 0,042602098  | 0 | N.A. | 0 |
| CCDC170      | 0,186672454 | 0,191540564  | 0 | N.A. | 0 |
| TMPRSS7      | 0,186527691 | 0,570917211  | 0 | N.A. | 0 |
| ZNF189       | 0,186320438 | -0,094008437 | 0 | N.A. | 0 |
| BMF          | 0,186266357 | 0,054816433  | 0 | N.A. | 0 |
| EPDR1        | 0,186142921 | 0,386682662  | 0 | N.A. | 0 |
| FOLR2        | 0,186127629 | 0,028792976  | 0 | N.A. | 0 |
| CDH4         | 0,186075885 |              | 0 | N.A. | 0 |
| CYBRD1       | 0,18606719  | -0,008287856 | 0 | N.A. | 0 |
| AHSA2        | 0,186064762 | 0,326869786  | 0 | N.A. | 0 |
| NISCH        | 0,186011872 | 0,377903147  | 0 | N.A. | 0 |
| RNF13        | 0,185888767 | -0,081351202 | 0 | N.A. | 0 |
| RP11-420L9.1 | 0,185862913 | 0,20014337   | 0 | N.A. | 0 |
| ZNF44        | 0,185839009 | 0,061385438  | 0 | N.A. | 0 |
| TBL1XR1      | 0,185830706 | 0,157244983  | 0 | N.A. | 0 |

|              |             |              |   |      |   |
|--------------|-------------|--------------|---|------|---|
| PIEZO1       | 0,185802173 | 0,460296307  | 0 | N.A. | 0 |
| ASPH         | 0,185785124 | 0,581904323  | 0 | N.A. | 0 |
| ABHD17B      | 0,185768456 | 0,023572806  | 0 | N.A. | 0 |
| METTL15      | 0,185749766 | -0,294136527 | 0 | N.A. | 0 |
| LIMCH1       | 0,185729708 | 0,303547747  | 0 | N.A. | 0 |
| NPR3         | 0,185680466 | -0,130813987 | 0 | N.A. | 0 |
| TM6SF1       | 0,18566874  |              | 0 | N.A. | 0 |
| CTB-178M22   | 0,185613862 |              | 0 | N.A. | 0 |
| TBX2-AS1     | 0,185596848 | 0,03080412   | 0 | N.A. | 0 |
| VCPIP1       | 0,185432188 | 0,293958862  | 0 | N.A. | 0 |
| CCDC9        | 0,185339932 | 0,128068274  | 0 | N.A. | 0 |
| CLTC         | 0,185289468 | 0,326942008  | 0 | N.A. | 0 |
| EZH1         | 0,185245114 | 0,356694756  | 0 | N.A. | 0 |
| ZNF532       | 0,18523375  | 0,077699423  | 0 | N.A. | 0 |
| ZNF827       | 0,18519599  | 0,033131766  | 0 | N.A. | 0 |
| PDLIM4       | 0,185167427 | 0,094329668  | 0 | N.A. | 0 |
| CTDNEP1      | 0,18515726  | 0,149387475  | 0 | N.A. | 0 |
| CTD-2376I4.2 | 0,185113635 | 0,176268525  | 0 | N.A. | 0 |
| PPM1A        | 0,185102975 | 0,197000334  | 0 | N.A. | 0 |
| ZSCAN25      | 0,185095317 | -0,226823777 | 0 | N.A. | 0 |
| CD22         | 0,18509379  |              | 0 | N.A. | 0 |
| CCL2         | 0,185043502 | 0,127042537  | 0 | N.A. | 0 |
| PHF21A       | 0,18499873  | -0,147248004 | 0 | N.A. | 0 |
| CH17-132F21  | 0,184992003 | 0,092583329  | 0 | N.A. | 0 |
| NBR1         | 0,184923643 | 0,333608717  | 0 | N.A. | 0 |
| EPB41L5      | 0,184850495 | 0,310744807  | 0 | N.A. | 0 |
| RNF24        | 0,184831687 | 0,159384318  | 0 | N.A. | 0 |
| TOB2         | 0,184797955 | 0,151945369  | 0 | N.A. | 0 |
| SH3TC2       | 0,184771532 | 0,289258418  | 0 | N.A. | 0 |
| HCN3         | 0,184741593 | -0,04374674  | 0 | N.A. | 0 |
| AC083843.1   | 0,184740414 | 0,16290718   | 0 | N.A. | 0 |
| AL163953.2   | 0,184724536 | -0,062569622 | 0 | N.A. | 0 |
| GALNT7       | 0,184637822 | 0,421718248  | 0 | N.A. | 0 |



|            |             |              |   |      |   |
|------------|-------------|--------------|---|------|---|
| UBL4B      | 0,184612634 |              | 0 | N.A. | 0 |
| SLC22A14   | 0,184587024 | 0,153750222  | 0 | N.A. | 0 |
| NRBP2      | 0,184583355 | 0,259704316  | 0 | N.A. | 0 |
| PER3       | 0,184573381 | 0,2158173    | 0 | N.A. | 0 |
| C5orf15    | 0,184402966 | 0,162090383  | 0 | N.A. | 0 |
| TNS3       | 0,1843745   | 0,235259241  | 0 | N.A. | 0 |
| TMPRSS6    | 0,184347768 | -0,208465827 | 0 | N.A. | 0 |
| ELOVL7     | 0,184343625 | 0,395864712  | 0 | N.A. | 0 |
| XAGE2B     | 0,184332556 | -0,315517422 | 0 | N.A. | 0 |
| AMN1       | 0,184311949 | 0,199592157  | 0 | N.A. | 0 |
| GYS1       | 0,184305503 | 0,166788918  | 0 | N.A. | 0 |
| OGFRL1     | 0,184275145 | 0,434598765  | 0 | N.A. | 0 |
| ZNF778     | 0,184230287 | 0,031992613  | 0 | N.A. | 0 |
| NRBF2      | 0,184216954 | 0,150679131  | 0 | N.A. | 0 |
| LINC01191  | 0,184192807 | 0,14117977   | 0 | N.A. | 0 |
| FTX        | 0,184170688 | 0,227427751  | 0 | N.A. | 0 |
| PLXNA2     | 0,184131081 | 0,359166531  | 0 | N.A. | 0 |
| CHST5      | 0,184094291 | -0,022545622 | 0 | N.A. | 0 |
| RP11-164O2 | 0,184073511 |              | 0 | N.A. | 0 |
| CLEC14A    | 0,183999731 | -0,149504505 | 0 | N.A. | 0 |
| RP11-347P5 | 0,183701818 | -0,095148846 | 0 | N.A. | 0 |
| AL592183.1 | 0,183558095 | 0,111833011  | 0 | N.A. | 0 |
| PRKCD      | 0,183491286 | 0,317377211  | 0 | N.A. | 0 |
| CCDC130    | 0,183364556 | 0,260202053  | 0 | N.A. | 0 |
| LRRC66     | 0,183333826 | 0,029757427  | 0 | N.A. | 0 |
| STAP2      | 0,183267313 | 0,274762631  | 0 | N.A. | 0 |
| LINC00887  | 0,183158553 | 0,267553522  | 0 | N.A. | 0 |
| THAP9-AS1  | 0,183138838 | 0,142571561  | 0 | N.A. | 0 |
| HERC3      | 0,183121599 | 0,132884185  | 0 | N.A. | 0 |
| MBP        | 0,18311903  | 0,034683329  | 0 | N.A. | 0 |
| RHOQ       | 0,182933911 | 0,314590838  | 0 | N.A. | 0 |
| TNFAIP8    | 0,182911571 | -0,212958274 | 0 | N.A. | 0 |
| SPIN1      | 0,182904899 | 0,234363579  | 0 | N.A. | 0 |

|             |             |              |   |      |   |
|-------------|-------------|--------------|---|------|---|
| PPM1N       | 0,182775274 | 0,202498515  | 0 | N.A. | 0 |
| DGCR5       | 0,182680056 | -0,026340043 | 0 | N.A. | 0 |
| TSPAN2      | 0,182611405 | 0,216873818  | 0 | N.A. | 0 |
| BRD4        | 0,182586661 | 0,436012899  | 0 | N.A. | 0 |
| KLF10       | 0,182449126 | 0,549276544  | 0 | N.A. | 0 |
| C2orf88     | 0,182390378 | 0,120641286  | 0 | N.A. | 0 |
| CAPN3       | 0,182346156 | -0,000309575 | 0 | N.A. | 0 |
| CFAP58      | 0,182290338 |              | 0 | N.A. | 0 |
| DSE         | 0,182257364 | 0,004806971  | 0 | N.A. | 0 |
| RP11-16E18. | 0,182195142 | 0,349537292  | 0 | N.A. | 0 |
| RLIM        | 0,18217157  | 0,199153271  | 0 | N.A. | 0 |
| TMEM51-AS1  | 0,181976388 | 0,381338239  | 0 | N.A. | 0 |
| HIC2        | 0,181957984 | 0,152938817  | 0 | N.A. | 0 |
| ZBTB5       | 0,18194376  | 0,180906259  | 0 | N.A. | 0 |
| CDK13       | 0,181883678 | 0,535538917  | 0 | N.A. | 0 |
| VPS11       | 0,181860862 | 0,14405209   | 0 | N.A. | 0 |
| TMEM132A    | 0,181789639 | 0,266322787  | 0 | N.A. | 0 |
| ALAS1       | 0,181758453 | 0,340011447  | 0 | N.A. | 0 |
| TRPV3       | 0,18164193  | 0,280213113  | 0 | N.A. | 0 |
| AMDHD2      | 0,181620199 | 0,423874118  | 0 | N.A. | 0 |
| KANSL1      | 0,181502017 | 0,273253007  | 0 | N.A. | 0 |
| ASPHD1      | 0,181481747 | 0,005306164  | 0 | N.A. | 0 |
| STK4        | 0,181470451 | 0,004074473  | 0 | N.A. | 0 |
| RP4-651E10. | 0,181425687 | -0,193282058 | 0 | N.A. | 0 |
| LINC00431   | 0,181384497 | 0,116525735  | 0 | N.A. | 0 |
| FAM118A     | 0,181304598 | 0,188783911  | 0 | N.A. | 0 |
| RP11-297L17 | 0,181297054 | 0,131763734  | 0 | N.A. | 0 |
| SLC25A30    | 0,1811838   | -0,064473629 | 0 | N.A. | 0 |
| DUSP1       | 0,18109278  | 0,203051856  | 0 | N.A. | 0 |
| FAM149B1    | 0,181051688 | 0,293042436  | 0 | N.A. | 0 |
| CTC1        | 0,181044407 | 0,063204769  | 0 | N.A. | 0 |
| MAP2        | 0,181004374 | 0,26945924   | 0 | N.A. | 0 |
| MSANTD3     | 0,180949673 | -0,098548804 | 0 | N.A. | 0 |

|              |             |              |   |      |   |
|--------------|-------------|--------------|---|------|---|
| RP11-175O19  | 0,180902442 | 0,345539792  | 0 | N.A. | 0 |
| AP3S1        | 0,180897407 | -0,16625635  | 0 | N.A. | 0 |
| IQGAP1       | 0,180832508 | 0,510673985  | 0 | N.A. | 0 |
| NR4A3        | 0,180830195 | 0,032291196  | 0 | N.A. | 0 |
| BRSK1        | 0,180775428 | 0,25908215   | 0 | N.A. | 0 |
| TLE4         | 0,18067326  | 0,296405127  | 0 | N.A. | 0 |
| EML2         | 0,18057279  | 0,330799155  | 0 | N.A. | 0 |
| C1orf56      | 0,180464349 | 0,013016866  | 0 | N.A. | 0 |
| RBMS1        | 0,180436631 | -0,178076682 | 0 | N.A. | 0 |
| RP4-548D19.  | 0,180429286 | 0,114184082  | 0 | N.A. | 0 |
| RP11-585P4.  | 0,180307098 | 0,259874763  | 0 | N.A. | 0 |
| STIM1        | 0,180293271 | 0,097459386  | 0 | N.A. | 0 |
| TNFRSF19     | 0,180224396 | -0,010757433 | 0 | N.A. | 0 |
| RC3H2        | 0,180223051 | 0,269719078  | 0 | N.A. | 0 |
| RFX1         | 0,18020421  | -0,006117622 | 0 | N.A. | 0 |
| NOL3         | 0,18016763  | 0,386450203  | 0 | N.A. | 0 |
| CADPS        | 0,180165488 | 0,123520386  | 0 | N.A. | 0 |
| QRICH2       | 0,180120133 | 0,125323948  | 0 | N.A. | 0 |
| CHD1         | 0,180100343 | 0,270773981  | 0 | N.A. | 0 |
| CECR2        | 0,180085069 | -0,146695333 | 0 | N.A. | 0 |
| FAM71F1      | 0,180008609 |              | 0 | N.A. | 0 |
| RP11-809O15  | 0,179991232 | 0,374586801  | 0 | N.A. | 0 |
| NECAP2       | 0,179909228 | 0,235911098  | 0 | N.A. | 0 |
| TBC1D32      | 0,179893912 | 0,145050296  | 0 | N.A. | 0 |
| PALLD        | 0,179879965 | 0,398740005  | 0 | N.A. | 0 |
| TMEM170A     | 0,17987344  | 0,210738683  | 0 | N.A. | 0 |
| TAOK2        | 0,179866671 | 0,401559012  | 0 | N.A. | 0 |
| RP3-508I15.2 | 0,179845518 | 0,270324964  | 0 | N.A. | 0 |
| QKI          | 0,179836634 | -0,117004773 | 0 | N.A. | 0 |
| IL22         | 0,179820086 |              | 0 | N.A. | 0 |
| RP11-106E15  | 0,179736395 |              | 0 | N.A. | 0 |
| LTB          | 0,179733897 | -0,00814715  | 0 | N.A. | 0 |
| PTPRM        | 0,179719044 | -0,117982549 | 0 | N.A. | 0 |

|             |             |              |   |      |   |
|-------------|-------------|--------------|---|------|---|
| GPATCH8     | 0,17962985  | 0,238959319  | 0 | N.A. | 0 |
| C12orf75    | 0,179572514 | 0,103656727  | 0 | N.A. | 0 |
| CCDC85C     | 0,179565673 | 0,141912311  | 0 | N.A. | 0 |
| MEX3D       | 0,179432061 | 0,215079015  | 0 | N.A. | 0 |
| NAGA        | 0,179426845 | 0,152212493  | 0 | N.A. | 0 |
| PSME4       | 0,179401649 | 0,070163463  | 0 | N.A. | 0 |
| SHPK        | 0,179383494 | -0,08008486  | 0 | N.A. | 0 |
| FAM25G      | 0,179314989 | 0,458092806  | 0 | N.A. | 0 |
| FMO5        | 0,179291941 | 0,147772487  | 0 | N.A. | 0 |
| NOTCH3      | 0,179282254 | 0,104824775  | 0 | N.A. | 0 |
| PPP2R5A     | 0,17926453  | 0,147931762  | 0 | N.A. | 0 |
| CYFIP1      | 0,179245908 | 0,685485491  | 0 | N.A. | 0 |
| FHOD1       | 0,17920176  | 0,15193158   | 0 | N.A. | 0 |
| UPK3B       | 0,179170722 | 0,146797673  | 0 | N.A. | 0 |
| TBC1D10B    | 0,179168697 | 0,280728083  | 0 | N.A. | 0 |
| RNF44       | 0,179032493 | 0,041103715  | 0 | N.A. | 0 |
| RIT1        | 0,178935056 | 0,253067002  | 0 | N.A. | 0 |
| ICAM2       | 0,178748539 | -0,032413554 | 0 | N.A. | 0 |
| SRPR        | 0,178644434 | 0,247938817  | 0 | N.A. | 0 |
| GPR128      | 0,178636879 | 0,204548652  | 0 | N.A. | 0 |
| MT-ND3      | 0,178625205 | 0,311701558  | 0 | N.A. | 0 |
| OAF         | 0,17861749  | 0,158504685  | 0 | N.A. | 0 |
| RB1CC1      | 0,178607025 | 0,028165519  | 0 | N.A. | 0 |
| ITIH5       | 0,178485114 | 0,158163453  | 0 | N.A. | 0 |
| UBASH3B     | 0,178467229 | 0,064860937  | 0 | N.A. | 0 |
| RP11-820I16 | 0,178466166 | 0,035670707  | 0 | N.A. | 0 |
| COL6A2      | 0,178413894 | -0,316673789 | 0 | N.A. | 0 |
| DNER        | 0,178400618 |              | 0 | N.A. | 0 |
| VWA7        | 0,178304158 | -0,241094895 | 0 | N.A. | 0 |
| PCIF1       | 0,17822911  | 0,066834212  | 0 | N.A. | 0 |
| AMPD3       | 0,178219897 | 0,04376821   | 0 | N.A. | 0 |
| ANXA2R      | 0,178207296 | 0,106430207  | 0 | N.A. | 0 |
| PHLPP1      | 0,178149117 | -0,145965086 | 0 | N.A. | 0 |

|             |             |              |   |      |   |
|-------------|-------------|--------------|---|------|---|
| LINC00294   | 0,178086672 | 0,184071605  | 0 | N.A. | 0 |
| VIPR1       | 0,178036162 | 0,313338238  | 0 | N.A. | 0 |
| SULT1B1     | 0,17800203  | -0,028615991 | 0 | N.A. | 0 |
| KIF3B       | 0,177930224 | 0,206372618  | 0 | N.A. | 0 |
| ADIPOR1     | 0,177925367 | 0,424191798  | 0 | N.A. | 0 |
| COQ10B      | 0,177898477 | 0,197972567  | 0 | N.A. | 0 |
| CFAP46      | 0,177841667 | -0,195970343 | 0 | N.A. | 0 |
| PVR         | 0,177837651 | 0,326378704  | 0 | N.A. | 0 |
| ZNF319      | 0,177828147 | 0,091219404  | 0 | N.A. | 0 |
| ALPP        | 0,177824248 | 0,281053112  | 0 | N.A. | 0 |
| AP5B1       | 0,177804241 | 0,136357631  | 0 | N.A. | 0 |
| PTGER4      | 0,177771115 | -0,083512926 | 0 | N.A. | 0 |
| CSF2        | 0,177679953 | 0,273044424  | 0 | N.A. | 0 |
| RP11-95M15  | 0,177636608 | 0,109851328  | 0 | N.A. | 0 |
| S100A5      | 0,177602715 | -0,003278896 | 0 | N.A. | 0 |
| HDHD1       | 0,177540856 | 0,23009765   | 0 | N.A. | 0 |
| C18orf32    | 0,177540638 | -0,012266114 | 0 | N.A. | 0 |
| RUNDC1      | 0,177461254 | 0,152661273  | 0 | N.A. | 0 |
| AC006942.4  | 0,177388835 | 0,024977137  | 0 | N.A. | 0 |
| ZRANB1      | 0,17729379  | 0,132067775  | 0 | N.A. | 0 |
| SLC35B3     | 0,17725024  | 0,345607661  | 0 | N.A. | 0 |
| MLF1        | 0,177244372 | -0,0223275   | 0 | N.A. | 0 |
| EPHA1-AS1   | 0,177233101 | -0,067512272 | 0 | N.A. | 0 |
| PIP5KL1     | 0,177188551 | -0,034149377 | 0 | N.A. | 0 |
| LINC01239   | 0,177179427 | 0,193843058  | 0 | N.A. | 0 |
| MBD1        | 0,177125679 | -0,003348399 | 0 | N.A. | 0 |
| SLC9A3R1    | 0,176944147 | 0,306188555  | 0 | N.A. | 0 |
| EBLN3       | 0,176936232 | -0,051488773 | 0 | N.A. | 0 |
| P3H2        | 0,176860531 | 0,430779148  | 0 | N.A. | 0 |
| ABCC5       | 0,176840691 | 0,417360854  | 0 | N.A. | 0 |
| GABRA2      | 0,176780561 | -0,014099954 | 0 | N.A. | 0 |
| RP11-491F9. | 0,176780163 | -0,083427836 | 0 | N.A. | 0 |
| PHF8        | 0,176767828 | 0,195821287  | 0 | N.A. | 0 |

|             |             |              |   |      |   |
|-------------|-------------|--------------|---|------|---|
| FAM189A2    | 0,17662285  | 0,188770475  | 0 | N.A. | 0 |
| EXOC6B      | 0,176495313 | 0,240755725  | 0 | N.A. | 0 |
| KIAA0513    | 0,17638953  | 0,081975868  | 0 | N.A. | 0 |
| DNAJC16     | 0,176347464 | 0,207372867  | 0 | N.A. | 0 |
| GAB2        | 0,176338358 | 0,352993307  | 0 | N.A. | 0 |
| ZNF226      | 0,17631959  | 0,137095943  | 0 | N.A. | 0 |
| CD93        | 0,176238878 | -0,108145598 | 0 | N.A. | 0 |
| SPINK5      | 0,17621807  | 0,324470044  | 0 | N.A. | 0 |
| CRYAB       | 0,176079463 | -0,176184419 | 0 | N.A. | 0 |
| RP11-281P23 | 0,176021971 | -0,028222144 | 0 | N.A. | 0 |
| RP11-314A20 | 0,176018367 | 0,162514099  | 0 | N.A. | 0 |
| HIST2H4A    | 0,176015558 | -0,027483463 | 0 | N.A. | 0 |
| CAPN12      | 0,176005724 | 0,307954849  | 1 | none | 0 |
| TMEM158     | 0,175934516 | 0,378037699  | 0 | N.A. | 0 |
| MTF1        | 0,175564361 | 0,264513426  | 0 | N.A. | 0 |
| RBL2        | 0,175445864 | 0,018614452  | 0 | N.A. | 0 |
| FOXL1       | 0,175440057 | 0,377920556  | 0 | N.A. | 0 |
| ARHGEF10    | 0,175422897 | 0,195723315  | 0 | N.A. | 0 |
| TMEM92-AS1  | 0,175394529 | 0,132469089  | 0 | N.A. | 0 |
| GDAP2       | 0,175345734 | 0,189848328  | 0 | N.A. | 0 |
| GAB1        | 0,175317398 | 0,213723087  | 0 | N.A. | 0 |
| HDLBP       | 0,17519332  | 0,114596042  | 0 | N.A. | 0 |
| KCNC4       | 0,175184529 | 0,400604519  | 0 | N.A. | 0 |
| DNAJA4      | 0,175169664 | 0,5639123    | 0 | N.A. | 0 |
| ZNF800      | 0,17512954  | 0,047753288  | 0 | N.A. | 0 |
| RGS20       | 0,1750808   | -0,295481462 | 0 | N.A. | 0 |
| CFLAR-AS1   | 0,175021238 | -0,117616867 | 0 | N.A. | 0 |
| ANKRD13D    | 0,17501103  | 0,363845594  | 0 | N.A. | 0 |
| CTA-228A9.4 | 0,17500629  | -0,060887173 | 0 | N.A. | 0 |
| CXCL6       | 0,175001263 | -0,013508372 | 0 | N.A. | 0 |
| SPNS3       | 0,174996735 | -0,145595202 | 0 | N.A. | 0 |
| ATP9B       | 0,17495517  | -0,058470887 | 0 | N.A. | 0 |
| RP11-434H6  | 0,174945316 |              | 0 | N.A. | 0 |

|              |             |              |   |      |   |
|--------------|-------------|--------------|---|------|---|
| SCRN1        | 0,174866201 | 0,256346264  | 0 | N.A. | 0 |
| IP6K1        | 0,174747283 | 0,263515321  | 0 | N.A. | 0 |
| IL20RB       | 0,174696154 | 0,065705881  | 0 | N.A. | 0 |
| FMR1         | 0,174618603 | 0,416625376  | 0 | N.A. | 0 |
| CTD-2105E13  | 0,174609342 | 0,40905254   | 0 | N.A. | 0 |
| DPP8         | 0,174608418 | 0,223812821  | 0 | N.A. | 0 |
| SLC35A5      | 0,174507211 | 0,002193807  | 0 | N.A. | 0 |
| TMEM87A      | 0,174337298 | 0,510788997  | 0 | N.A. | 0 |
| ZNF12        | 0,174290225 | 0,291899519  | 0 | N.A. | 0 |
| BRPF3        | 0,174288424 | 0,007782576  | 0 | N.A. | 0 |
| RP11-20G13.  | 0,174200001 |              | 0 | N.A. | 0 |
| OPLAH        | 0,174139643 | 0,397807155  | 0 | N.A. | 0 |
| TLR9         | 0,174108188 |              | 0 | N.A. | 0 |
| CDNF         | 0,174043521 | 0,193239585  | 0 | N.A. | 0 |
| NACC2        | 0,17404027  | 0,200497908  | 0 | N.A. | 0 |
| ECHDC2       | 0,174002868 | 0,33194266   | 0 | N.A. | 0 |
| RP11-140K17  | 0,173979428 | -0,036125052 | 0 | N.A. | 0 |
| SYS1         | 0,173946045 | -0,022001119 | 0 | N.A. | 0 |
| RP11-15F12.  | 0,173828049 | 0,21855916   | 0 | N.A. | 0 |
| RP11-70P17.  | 0,173820734 | 0,143225918  | 0 | N.A. | 0 |
| SKIL         | 0,173798224 | 0,416627853  | 0 | N.A. | 0 |
| FMNL2        | 0,173751261 | 0,012870366  | 0 | N.A. | 0 |
| PAFAH1B2     | 0,173582394 | 0,24352668   | 0 | N.A. | 0 |
| TNNI2        | 0,173579496 | -0,022543239 | 0 | N.A. | 0 |
| B4GALT4      | 0,173543294 | 0,402368745  | 0 | N.A. | 0 |
| CTC-529I10.2 | 0,173521842 |              | 0 | N.A. | 0 |
| CORO1B       | 0,17347209  | 0,025604041  | 0 | N.A. | 0 |
| LRRC42       | 0,173404699 | 0,33093323   | 0 | N.A. | 0 |
| IKBKB        | 0,17337161  | 0,329253822  | 0 | N.A. | 0 |
| ZNF654       | 0,17330869  | 0,224940903  | 0 | N.A. | 0 |
| SOCS3        | 0,173301128 | 0,062711337  | 0 | N.A. | 0 |
| LILRA5       | 0,173225286 | 0,034646191  | 0 | N.A. | 0 |
| KCNK7        | 0,173182735 | 0,133265307  | 0 | N.A. | 0 |

|             |             |              |   |      |   |
|-------------|-------------|--------------|---|------|---|
| RP11-567C2. | 0,173168395 | 0,342050578  | 0 | N.A. | 0 |
| RARG        | 0,17316741  | -0,037264045 | 0 | N.A. | 0 |
| ZNF697      | 0,173149771 | 0,247511506  | 0 | N.A. | 0 |
| LRG1        | 0,173128119 | 0,223963894  | 0 | N.A. | 0 |
| TNNT2       | 0,173122411 | 0,324259085  | 0 | N.A. | 0 |
| RASA1       | 0,173119312 | 0,284034148  | 0 | N.A. | 0 |
| SLC33A1     | 0,173072917 | 0,258776034  | 0 | N.A. | 0 |
| RAP1A       | 0,173062429 | -0,159088535 | 0 | N.A. | 0 |
| AATK        | 0,173019529 | 0,415777387  | 0 | N.A. | 0 |
| KLHL24      | 0,17301688  | -0,067651878 | 0 | N.A. | 0 |
| KIAA0195    | 0,172985358 | 0,348646774  | 0 | N.A. | 0 |
| POLN        | 0,172892462 | 0,085766164  | 0 | N.A. | 0 |
| ZNF607      | 0,17278927  | -0,070629723 | 0 | N.A. | 0 |
| LYPD1       | 0,172772281 |              | 0 | N.A. | 0 |
| USP35       | 0,172718069 | 0,276003493  | 0 | N.A. | 0 |
| RP1-122P22. | 0,172710973 | 0,259564258  | 0 | N.A. | 0 |
| ZNF335      | 0,172639515 | -0,133589439 | 0 | N.A. | 0 |
| CCDC92      | 0,172557067 | 3,89924E-05  | 0 | N.A. | 0 |
| KB-226F1.2  | 0,172524889 |              | 0 | N.A. | 0 |
| TMEM176B    | 0,17251652  | 0,332774106  | 0 | N.A. | 0 |
| TNK1        | 0,172481729 | 0,330914812  | 0 | N.A. | 0 |
| GLIPR1      | 0,172415235 | -0,179172676 | 0 | N.A. | 0 |
| MADD        | 0,172294669 | 0,070607136  | 0 | N.A. | 0 |
| RP11-677M1  | 0,172128141 | 0,271381801  | 0 | N.A. | 0 |
| LRRC8D      | 0,172101286 | -0,05618999  | 0 | N.A. | 0 |
| GGA3        | 0,171902345 | 0,209595781  | 0 | N.A. | 0 |
| UNC13A      | 0,171800041 | 0,3336272    | 0 | N.A. | 0 |
| CCDC50      | 0,171767279 | 0,218831292  | 0 | N.A. | 0 |
| PROM1       | 0,171765852 | 0,223733852  | 0 | N.A. | 0 |
| ZACN        | 0,171764771 |              | 0 | N.A. | 0 |
| RP4-541C22. | 0,171703691 | 0,024340575  | 0 | N.A. | 0 |
| TBC1D9      | 0,171662602 | 0,106293767  | 0 | N.A. | 0 |
| MS4A12      | 0,171652054 | 0,225197749  | 0 | N.A. | 0 |



|             |             |              |   |      |   |
|-------------|-------------|--------------|---|------|---|
| TMEM45A     | 0,171574111 | -0,090108248 | 0 | N.A. | 0 |
| VTI1A       | 0,171547213 | 0,009579905  | 0 | N.A. | 0 |
| TMEM229B    | 0,171524974 | -0,039159383 | 0 | N.A. | 0 |
| RABGEF1     | 0,171495343 | -0,21269739  | 0 | N.A. | 0 |
| GOLGA1      | 0,171379056 | 0,010035834  | 0 | N.A. | 0 |
| AC026471.6  | 0,171289263 | 0,096176814  | 0 | N.A. | 0 |
| EAF2        | 0,171194724 | -0,191423152 | 0 | N.A. | 0 |
| N4BP2       | 0,171167211 | -0,108954979 | 0 | N.A. | 0 |
| BTBD9       | 0,170989099 | 0,092730394  | 0 | N.A. | 0 |
| RP11-353N14 | 0,170933173 | 0,051096686  | 0 | N.A. | 0 |
| SLFNL1-AS1  | 0,170912746 |              | 0 | N.A. | 0 |
| IL15RA      | 0,170818914 | -0,124846456 | 0 | N.A. | 0 |
| VSIG10      | 0,170777186 | 0,441086422  | 0 | N.A. | 0 |
| CDK17       | 0,17075057  | 0,409120456  | 0 | N.A. | 0 |
| BROX        | 0,170720564 | 0,12051811   | 0 | N.A. | 0 |
| HIST1H4E    | 0,170684144 | -0,102146105 | 0 | N.A. | 0 |
| CELF1       | 0,170624034 | 0,175305391  | 0 | N.A. | 0 |
| AC010287.1  | 0,17057594  | 0,327275221  | 0 | N.A. | 0 |
| ELMSAN1     | 0,170572782 | 0,545763565  | 0 | N.A. | 0 |
| DRC1        | 0,170506319 | -0,080244804 | 0 | N.A. | 0 |
| TRAF6       | 0,170498153 | -0,010422107 | 0 | N.A. | 0 |
| MANSC1      | 0,170480561 | 0,099714062  | 0 | N.A. | 0 |
| ALKBH7      | 0,170450015 | 0,200433529  | 0 | N.A. | 0 |
| SPATA20     | 0,170418608 | 0,218756984  | 0 | N.A. | 0 |
| TMEM173     | 0,170414901 | 0,116208795  | 0 | N.A. | 0 |
| CCAT1       | 0,170362764 | 0,0698793    | 0 | N.A. | 0 |
| COL28A1     | 0,170314382 | 0,33153071   | 0 | N.A. | 0 |
| RNASEL      | 0,170306597 | 0,265253642  | 0 | N.A. | 0 |
| AC007228.9  | 0,170302308 | 0,196690384  | 0 | N.A. | 0 |
| WHAMM       | 0,170234431 | 0,130539234  | 0 | N.A. | 0 |
| RP11-104L21 | 0,170193098 |              | 0 | N.A. | 0 |
| RABGAP1     | 0,170160118 | 0,256855497  | 0 | N.A. | 0 |
| BATF        | 0,170073801 | -0,061441338 | 0 | N.A. | 0 |

|              |             |              |   |      |   |
|--------------|-------------|--------------|---|------|---|
| RP11-190J1.3 | 0,17005759  | -0,015845183 | 0 | N.A. | 0 |
| DIO3         | 0,170005305 | -0,1680564   | 0 | N.A. | 0 |
| CCNDBP1      | 0,170002835 | 0,378548986  | 0 | N.A. | 0 |
| PLCE1        | 0,169939076 | 0,04067697   | 0 | N.A. | 0 |
| AGR3         | 0,169918182 | 0,194936921  | 0 | N.A. | 0 |
| RAB18        | 0,169852824 | 0,267168889  | 0 | N.A. | 0 |
| LINC01569    | 0,169795569 | 0,107337101  | 0 | N.A. | 0 |
| SPATA6L      | 0,169470699 | -0,097013237 | 0 | N.A. | 0 |
| ZBED2        | 0,169469776 | 0,21462849   | 0 | N.A. | 0 |
| ARID3B       | 0,169458455 | 0,030788816  | 0 | N.A. | 0 |
| PKN1         | 0,169442556 | 0,374862623  | 0 | N.A. | 0 |
| PLK2         | 0,169319581 | 0,016097467  | 0 | N.A. | 0 |
| SLC35E2B     | 0,169243686 | 0,412763086  | 0 | N.A. | 0 |
| SP3          | 0,1692295   | 0,23469021   | 0 | N.A. | 0 |
| STXBP3       | 0,169085071 | 0,187306975  | 0 | N.A. | 0 |
| SCX          | 0,169084487 | 0,044466795  | 0 | N.A. | 0 |
| TIGIT        | 0,169081508 | -0,213878845 | 0 | N.A. | 0 |
| ZSCAN22      | 0,16907938  | -0,003665226 | 0 | N.A. | 0 |
| MOGAT2       | 0,169078738 | 0,206846633  | 0 | N.A. | 0 |
| CTD-2589M5   | 0,169055669 | 0,16178968   | 0 | N.A. | 0 |
| ZNF449       | 0,168987826 | 0,069522606  | 0 | N.A. | 0 |
| CTD-2555C10  | 0,168939729 | 0,034527961  | 0 | N.A. | 0 |
| NGEF         | 0,168907479 | 0,533983327  | 0 | N.A. | 0 |
| EPHB6        | 0,168882092 | 0,25714509   | 0 | N.A. | 0 |
| AQP12B       | 0,168763292 | 0,317309979  | 0 | N.A. | 0 |
| ZFX          | 0,168706435 | 0,247591681  | 0 | N.A. | 0 |
| WAC          | 0,168685239 | 0,253535968  | 0 | N.A. | 0 |
| LIN7B        | 0,168616408 | -0,006778506 | 0 | N.A. | 0 |
| RP11-338I21  | 0,168554468 | 0,162515599  | 0 | N.A. | 0 |
| TMCO4        | 0,168524904 | 0,303755914  | 0 | N.A. | 0 |
| SOS1         | 0,168499071 | 0,218368611  | 0 | N.A. | 0 |
| CCDC153      | 0,168495642 | -0,245897391 | 0 | N.A. | 0 |
| AP000695.4   | 0,168452321 | 0,161130092  | 0 | N.A. | 0 |

|              |             |              |   |      |   |
|--------------|-------------|--------------|---|------|---|
| GABRR2       | 0,168349383 | 0,058329981  | 0 | N.A. | 0 |
| NRP1         | 0,168328858 | -0,001590519 | 0 | N.A. | 0 |
| PBLD         | 0,168324388 | -0,209240086 | 0 | N.A. | 0 |
| MAN1C1       | 0,168248582 |              | 0 | N.A. | 0 |
| BCAP29       | 0,168209933 | 0,159074519  | 0 | N.A. | 0 |
| TFPT         | 0,168132902 | 0,068522197  | 0 | N.A. | 0 |
| CCDC28A      | 0,168123607 | -0,263039087 | 0 | N.A. | 0 |
| GUCA2A       | 0,16805049  | 0,440568392  | 0 | N.A. | 0 |
| RP11-184D12  | 0,16801781  |              | 0 | N.A. | 0 |
| ORMDL3       | 0,16795923  | 0,296636886  | 0 | N.A. | 0 |
| RP13-726E6   | 0,167916309 | 0,065756466  | 0 | N.A. | 0 |
| DNAH1        | 0,167781048 | 0,129276159  | 0 | N.A. | 0 |
| RP11-65I12.1 | 0,167748211 | 0,532604822  | 0 | N.A. | 0 |
| RP1-101D8.1  | 0,167740092 | 0,19026848   | 0 | N.A. | 0 |
| SOD2         | 0,167685686 | -0,080699742 | 0 | N.A. | 0 |
| PITPNM2      | 0,16750551  | -0,071193704 | 0 | N.A. | 0 |
| LINC00525    | 0,167502202 | 0,235083226  | 0 | N.A. | 0 |
| DUSP27       | 0,167478615 | 0,157194107  | 1 | none | 0 |
| ABCB1        | 0,16740101  | 0,297906975  | 0 | N.A. | 0 |
| ARHGAP18     | 0,167382017 | -0,041389725 | 0 | N.A. | 0 |
| PTGIR        | 0,167336666 |              | 0 | N.A. | 0 |
| LRP4         | 0,167336003 | -0,00969006  | 0 | N.A. | 0 |
| ESAM         | 0,167307219 | 0,214088778  | 0 | N.A. | 0 |
| RNF2         | 0,167289488 | -0,12946271  | 0 | N.A. | 0 |
| PTPLB        | 0,167283438 | 0,474586263  | 0 | N.A. | 0 |
| CREG2        | 0,167274224 | 0,386472538  | 0 | N.A. | 0 |
| POT1-AS1     | 0,167229061 | 0,098399469  | 0 | N.A. | 0 |
| CASC4        | 0,167221051 | 0,34637322   | 0 | N.A. | 0 |
| RP11-278H7   | 0,167199759 | -0,196300811 | 0 | N.A. | 0 |
| FBXL20       | 0,16715624  | 0,032625118  | 0 | N.A. | 0 |
| ANKRD1       | 0,167072026 | 0,407807316  | 0 | N.A. | 0 |
| FAM13A-AS1   | 0,166826029 | 0,094832754  | 0 | N.A. | 0 |
| APOBEC3C     | 0,166716722 | -0,160914768 | 0 | N.A. | 0 |

|              |             |              |   |      |   |
|--------------|-------------|--------------|---|------|---|
| MAPK8        | 0,166692819 | 0,065189756  | 0 | N.A. | 0 |
| IL2RA        | 0,166560385 | 0,12624485   | 0 | N.A. | 0 |
| RP11-358B23  | 0,166510661 |              | 0 | N.A. | 0 |
| PTGDS        | 0,1664442   | 0,029063499  | 0 | N.A. | 0 |
| CSF2RA       | 0,166416139 | 0,078253757  | 0 | N.A. | 0 |
| USP30        | 0,166383321 | -0,086024601 | 0 | N.A. | 0 |
| AKT2         | 0,16637973  | 0,331413118  | 0 | N.A. | 0 |
| KCTD10       | 0,16633169  | 0,116212028  | 0 | N.A. | 0 |
| ZNF814       | 0,166304482 | -0,065856381 | 0 | N.A. | 0 |
| FCHSD1       | 0,166284512 | 0,191453767  | 0 | N.A. | 0 |
| HSPA5        | 0,166158499 | 0,361369926  | 0 | N.A. | 0 |
| ANPEP        | 0,166136081 | 0,025918116  | 0 | N.A. | 0 |
| RP1-102K2.8  | 0,166128737 | 0,212960844  | 0 | N.A. | 0 |
| AC002117.1   | 0,16607388  | 0,094202907  | 0 | N.A. | 0 |
| IRF9         | 0,166016946 | 0,341945498  | 0 | N.A. | 0 |
| AEN          | 0,165984444 | -0,053904813 | 0 | N.A. | 0 |
| ARHGEF2      | 0,165941246 | 0,311226938  | 0 | N.A. | 0 |
| ZBTB1        | 0,165936035 | 0,037235071  | 0 | N.A. | 0 |
| RP11-147L13  | 0,165931454 | 0,150892046  | 0 | N.A. | 0 |
| CTD-2026G6   | 0,165882316 | -0,302480243 | 0 | N.A. | 0 |
| PHF23        | 0,165823707 | -0,102035017 | 0 | N.A. | 0 |
| HYI-AS1      | 0,16560372  | 0,040179849  | 0 | N.A. | 0 |
| TMEM50A      | 0,165595228 | 0,403623906  | 0 | N.A. | 0 |
| PTPN1        | 0,16551046  | -0,081296364 | 0 | N.A. | 0 |
| MARVELD3     | 0,165423277 | 0,294174153  | 0 | N.A. | 0 |
| RP11-626P14  | 0,165388004 | 0,218304903  | 0 | N.A. | 0 |
| MBTPS1       | 0,165360068 | 0,271489942  | 0 | N.A. | 0 |
| TMEM81       | 0,16535411  | -0,174607198 | 0 | N.A. | 0 |
| TBC1D10A     | 0,16534681  | 0,085734238  | 0 | N.A. | 0 |
| KIAA1462     | 0,165065651 | -0,036353573 | 0 | N.A. | 0 |
| TDP2         | 0,165014047 | 0,212863187  | 0 | N.A. | 0 |
| SLAIN2       | 0,164968909 | -0,00541151  | 0 | N.A. | 0 |
| RP11-71L14.4 | 0,16490645  | -0,068127139 | 0 | N.A. | 0 |

|             |             |              |   |      |   |
|-------------|-------------|--------------|---|------|---|
| ZER1        | 0,164797564 | 0,180719721  | 0 | N.A. | 0 |
| FOXJ3       | 0,164662698 | 0,139215181  | 0 | N.A. | 0 |
| CH17-189H2  | 0,164576153 | 0,323132852  | 0 | N.A. | 0 |
| NR4A1       | 0,164500947 | 0,157899307  | 0 | N.A. | 0 |
| PCDHGA7     | 0,164419829 | 0,022309811  | 0 | N.A. | 0 |
| RP11-556E13 | 0,164419763 | -0,164323771 | 0 | N.A. | 0 |
| PMM1        | 0,164394525 | 0,200064199  | 0 | N.A. | 0 |
| SYNRG       | 0,164365769 | 0,223974338  | 0 | N.A. | 0 |
| LL22NC03-86 | 0,164315139 | 0,17641444   | 0 | N.A. | 0 |
| MTCL1       | 0,164252404 | 0,245658862  | 0 | N.A. | 0 |
| CHIT1       | 0,164167458 |              | 0 | N.A. | 0 |
| RP11-349K16 | 0,164082617 | -0,311815668 | 0 | N.A. | 0 |
| RGS6        | 0,164046094 | 0,193557538  | 0 | N.A. | 0 |
| PDK1        | 0,163926519 | 0,120196369  | 0 | N.A. | 0 |
| ABCA13      | 0,163834051 | -0,104640948 | 0 | N.A. | 0 |
| GJB5        | 0,163833734 | 0,570084996  | 0 | N.A. | 0 |
| GLIS3       | 0,163736915 | 0,128646713  | 0 | N.A. | 0 |
| KIF21B      | 0,163728838 | -0,116574125 | 0 | N.A. | 0 |
| LYZ         | 0,163715192 | -0,055923086 | 0 | N.A. | 0 |
| RSPO3       | 0,163702609 | -0,291588186 | 0 | N.A. | 0 |
| RP11-304F15 | 0,163676213 | -0,089438812 | 0 | N.A. | 0 |
| SSBP2       | 0,163661851 | 0,034952091  | 0 | N.A. | 0 |
| CH17-118O6  | 0,163656118 | -0,379527016 | 0 | N.A. | 0 |
| LINC01504   | 0,163640108 | 0,215004635  | 0 | N.A. | 0 |
| TMEM117     | 0,163617509 | 0,084000461  | 0 | N.A. | 0 |
| ALPK1       | 0,163576983 | 0,175982627  | 0 | N.A. | 0 |
| LHFP        | 0,16356055  | 0,041316987  | 0 | N.A. | 0 |
| CD274       | 0,163541413 | 0,096102586  | 0 | N.A. | 0 |
| CPD         | 0,16339802  | 0,248701675  | 0 | N.A. | 0 |
| MYO18A      | 0,163393717 | 0,367637312  | 0 | N.A. | 0 |
| MAP3K9      | 0,163335606 | 0,426928898  | 0 | N.A. | 0 |
| RP11-432J24 | 0,163324911 | -0,012097956 | 0 | N.A. | 0 |
| DYNC1LI2    | 0,163322438 | 0,31079747   | 0 | N.A. | 0 |

|             |             |              |   |      |   |
|-------------|-------------|--------------|---|------|---|
| HLA-DQB1    | 0,16328116  | -0,349395019 | 0 | N.A. | 0 |
| LIMK1       | 0,163181722 | 0,202824944  | 0 | N.A. | 0 |
| RP11-10A14. | 0,163152977 | 0,021537286  | 0 | N.A. | 0 |
| CERCAM      | 0,163091791 | 0,119174547  | 0 | N.A. | 0 |
| HIVEP1      | 0,163069875 | 0,009177076  | 0 | N.A. | 0 |
| RGL2        | 0,163067713 | -0,223118155 | 0 | N.A. | 0 |
| CDKL5       | 0,163052666 | 0,019952678  | 0 | N.A. | 0 |
| HEATR5A     | 0,162972481 | 0,362312597  | 0 | N.A. | 0 |
| RP11-362F19 | 0,162907304 |              | 0 | N.A. | 0 |
| RP5-837J1.6 | 0,162875228 | 0,097564043  | 0 | N.A. | 0 |
| SCAF1       | 0,162858813 | 0,420014888  | 0 | N.A. | 0 |
| POR         | 0,162759424 | 0,430357142  | 0 | N.A. | 0 |
| DERL2       | 0,162734323 | 0,259789423  | 0 | N.A. | 0 |
| RP11-525K10 | 0,162700006 |              | 0 | N.A. | 0 |
| RP11-598F7. | 0,162677417 | -0,122385768 | 0 | N.A. | 0 |
| AMICA1      | 0,162658117 | -0,290929694 | 0 | N.A. | 0 |
| TMEM189-U   | 0,162632587 |              | 0 | N.A. | 0 |
| RNF181      | 0,162609043 | 0,031986017  | 0 | N.A. | 0 |
| RAG1        | 0,162593276 | -0,102953856 | 0 | N.A. | 0 |
| STX5        | 0,162577116 | 0,177463524  | 0 | N.A. | 0 |
| FBXL2       | 0,16257681  | 0,016674774  | 0 | N.A. | 0 |
| GP6         | 0,162487324 | 0,134475965  | 0 | N.A. | 0 |
| ZFPM2       | 0,162479869 |              | 0 | N.A. | 0 |
| NUFIP2      | 0,162479568 | 0,342287797  | 0 | N.A. | 0 |
| CA12        | 0,162341061 | 0,39200135   | 0 | N.A. | 0 |
| RENBP       | 0,162324277 | 0,396502185  | 0 | N.A. | 0 |
| MAPK8IP3    | 0,162303728 | 0,110062357  | 0 | N.A. | 0 |
| MED14       | 0,16218721  | 0,206828868  | 0 | N.A. | 0 |
| CLEC5A      | 0,162176963 | 0,077707051  | 0 | N.A. | 0 |
| SLC9A7      | 0,162112709 | 0,007952415  | 0 | N.A. | 0 |
| ZBED6       | 0,16209413  | 0,105237491  | 0 | N.A. | 0 |
| MARCH6      | 0,162093963 | 0,582466934  | 0 | N.A. | 0 |
| BEST4       | 0,162056436 | -0,266248544 | 0 | N.A. | 0 |

|             |             |              |   |      |   |
|-------------|-------------|--------------|---|------|---|
| RP11-626H1  | 0,162001285 | 0,084067172  | 0 | N.A. | 0 |
| HN1         | 0,161980344 | 0,158195888  | 0 | N.A. | 0 |
| LINC01510   | 0,16193496  |              | 0 | N.A. | 0 |
| FBXL17      | 0,161873154 | -0,003077181 | 0 | N.A. | 0 |
| PFKFB4      | 0,161772536 | 0,107673368  | 0 | N.A. | 0 |
| RP11-755F10 | 0,16173201  | -0,017509888 | 0 | N.A. | 0 |
| RP11-390K5  | 0,161707313 | 0,107684654  | 0 | N.A. | 0 |
| RP11-219B4  | 0,161698545 |              | 0 | N.A. | 0 |
| IL23A       | 0,161696833 | 0,569652929  | 0 | N.A. | 0 |
| GPATCH2L    | 0,161644299 | 0,308265476  | 0 | N.A. | 0 |
| SH2B3       | 0,161598306 | -0,164888574 | 0 | N.A. | 0 |
| ICAM4       | 0,161571686 | 0,16611037   | 0 | N.A. | 0 |
| HMBOX1      | 0,161442347 | 0,153524581  | 0 | N.A. | 0 |
| TP53BP2     | 0,161391128 | 0,334808908  | 0 | N.A. | 0 |
| RP11-420A23 | 0,1613892   | 0,160947588  | 0 | N.A. | 0 |
| TRIP4       | 0,161369759 | 0,167447181  | 0 | N.A. | 0 |
| BIN2        | 0,161360984 | -0,341251827 | 0 | N.A. | 0 |
| STAT1       | 0,161320898 | 0,15270196   | 0 | N.A. | 0 |
| MREG        | 0,161290009 | -0,003863291 | 0 | N.A. | 0 |
| RP11-280G9  | 0,161238312 |              | 0 | N.A. | 0 |
| VAV2        | 0,161166586 | 0,322037759  | 0 | N.A. | 0 |
| USH1C       | 0,161159018 | 0,471854873  | 0 | N.A. | 0 |
| TMEM191B    | 0,161151889 | 0,190177434  | 0 | N.A. | 0 |
| CBL         | 0,161149298 | 0,154269609  | 0 | N.A. | 0 |
| RP11-42O15  | 0,161051762 | 0,149746045  | 0 | N.A. | 0 |
| MT-CO1      | 0,160934012 | 0,378861578  | 0 | N.A. | 0 |
| ZNF385D     | 0,160858989 | 0,037532155  | 0 | N.A. | 0 |
| SPRYD3      | 0,160841761 | -0,09309476  | 0 | N.A. | 0 |
| GMFB        | 0,160829346 | 0,001153843  | 0 | N.A. | 0 |
| GIMAP5      | 0,160667021 |              | 0 | N.A. | 0 |
| BRD1        | 0,16060248  | 0,045428416  | 0 | N.A. | 0 |
| FRAS1       | 0,16058949  | 0,307303532  | 0 | N.A. | 0 |
| SPATA12     | 0,160576489 | 0,002807628  | 0 | N.A. | 0 |

|             |             |              |   |      |   |
|-------------|-------------|--------------|---|------|---|
| PPBP        | 0,160434173 | 0,377276014  | 0 | N.A. | 0 |
| IL18R1      | 0,160367221 | 0,018993421  | 0 | N.A. | 0 |
| HRK         | 0,160359272 | -0,025111479 | 0 | N.A. | 0 |
| SLC37A3     | 0,160270133 | 0,304004026  | 0 | N.A. | 0 |
| KSR1        | 0,160153229 | 0,130028881  | 0 | N.A. | 0 |
| MAN2C1      | 0,160088188 | 0,200138649  | 0 | N.A. | 0 |
| GGA1        | 0,160048821 | 0,392715988  | 0 | N.A. | 0 |
| NIPBL       | 0,159960403 | 0,368446975  | 0 | N.A. | 0 |
| RAB40C      | 0,159948205 | 0,270186767  | 0 | N.A. | 0 |
| RASA4B      | 0,159937315 | -0,025106121 | 0 | N.A. | 0 |
| CHIC1       | 0,159840645 | 0,024915453  | 0 | N.A. | 0 |
| RP11-134L10 | 0,159664013 | 0,006909464  | 0 | N.A. | 0 |
| TRPM7       | 0,159509658 | 0,136308318  | 0 | N.A. | 0 |
| ERCC1       | 0,15950248  | 0,001278426  | 0 | N.A. | 0 |
| SMCR5       | 0,159469708 | 0,018017736  | 0 | N.A. | 0 |
| SHROOM4     | 0,159463915 | 0,14338689   | 0 | N.A. | 0 |
| YTHDF1      | 0,159343654 | 0,289845732  | 0 | N.A. | 0 |
| RGL1        | 0,159316948 | 0,197396939  | 0 | N.A. | 0 |
| IHH         | 0,159286513 | 0,077011714  | 0 | N.A. | 0 |
| ACBD5       | 0,159253522 | 0,393875258  | 0 | N.A. | 0 |
| CTSL        | 0,159220125 | 0,239956502  | 0 | N.A. | 0 |
| KDM2A       | 0,159195364 | 0,486194667  | 0 | N.A. | 0 |
| IGFL2       | 0,159177818 | -0,067799085 | 0 | N.A. | 0 |
| RAB3IP      | 0,158980996 | 0,226289117  | 0 | N.A. | 0 |
| PTPRA       | 0,158956652 | 0,241911172  | 0 | N.A. | 0 |
| LMF2        | 0,158945098 | 0,576152813  | 0 | N.A. | 0 |
| GOLGA8B     | 0,158867003 | 0,235300453  | 0 | N.A. | 0 |
| TRIQQ       | 0,158856925 | -0,128245745 | 0 | N.A. | 0 |
| EPSTI1      | 0,158751271 | 0,23800052   | 0 | N.A. | 0 |
| KLF5        | 0,158733228 | 0,487084399  | 0 | N.A. | 0 |
| CTD-2105E13 | 0,158655886 |              | 0 | N.A. | 0 |
| CIPC        | 0,15863439  | 0,077736795  | 0 | N.A. | 0 |
| GRID1       | 0,158600822 |              | 0 | N.A. | 0 |



|             |             |              |   |      |   |
|-------------|-------------|--------------|---|------|---|
| AP2A1       | 0,158518599 | 0,234634118  | 0 | N.A. | 0 |
| CTIF        | 0,158499576 | 0,124026156  | 0 | N.A. | 0 |
| STRIP1      | 0,158249081 | 0,103437995  | 0 | N.A. | 0 |
| COL5A3      | 0,158224643 | 0,011654102  | 0 | N.A. | 0 |
| WDR11       | 0,158199158 | 0,322116077  | 0 | N.A. | 0 |
| FGL2        | 0,158130876 | 0,158162013  | 0 | N.A. | 0 |
| MYADM       | 0,158098063 | 0,407622418  | 0 | N.A. | 0 |
| NNMT        | 0,158083761 | -0,007824433 | 0 | N.A. | 0 |
| MFSD9       | 0,158010359 | 0,109350256  | 0 | N.A. | 0 |
| PLEKHH2     | 0,157985693 | 0,250578443  | 0 | N.A. | 0 |
| UBE4A       | 0,157976563 | 0,350145476  | 0 | N.A. | 0 |
| EEF2K       | 0,15795797  | 0,019473447  | 0 | N.A. | 0 |
| CCR1        | 0,157953207 | -0,099000061 | 0 | N.A. | 0 |
| MKRN2OS     | 0,157932709 | 0,127032331  | 0 | N.A. | 0 |
| IGHV2-5     | 0,157851903 | -0,24672132  | 0 | N.A. | 0 |
| SLC5A9      | 0,157849575 | 0,061027552  | 0 | N.A. | 0 |
| TNRC6C      | 0,157844236 | 0,013435039  | 0 | N.A. | 0 |
| UBE2Q1      | 0,157760666 | 0,351828224  | 0 | N.A. | 0 |
| RP11-696F12 | 0,15765588  | 0,067041463  | 0 | N.A. | 0 |
| NBPF12      | 0,157618456 | 0,323966463  | 0 | N.A. | 0 |
| C6orf89     | 0,157483715 | 0,211458526  | 0 | N.A. | 0 |
| NEDD4       | 0,157476729 | 0,187216867  | 0 | N.A. | 0 |
| PPCS        | 0,157466917 | -0,009153113 | 0 | N.A. | 0 |
| RP11-434B12 | 0,157410658 | 0,05072519   | 0 | N.A. | 0 |
| BLZF1       | 0,157388964 | 0,330813325  | 0 | N.A. | 0 |
| OSR2        | 0,157380374 | -0,03082163  | 0 | N.A. | 0 |
| TMEM246     | 0,157353166 | 0,148944656  | 0 | N.A. | 0 |
| VLDLR       | 0,157249567 | 0,004189763  | 0 | N.A. | 0 |
| SDC1        | 0,15706344  | 0,556678269  | 0 | N.A. | 0 |
| HSD17B3     | 0,157026213 | 0,150570298  | 0 | N.A. | 0 |
| LDLRAD1     | 0,156935934 | -0,072914752 | 0 | N.A. | 0 |
| RHCE        | 0,156929112 | 0,21153329   | 0 | N.A. | 0 |
| RP11-805J14 | 0,156902513 | -0,2408747   | 0 | N.A. | 0 |

|             |             |              |   |      |   |
|-------------|-------------|--------------|---|------|---|
| CILP2       | 0,15681804  |              | 0 | N.A. | 0 |
| CTA-363E6.7 | 0,156812751 |              | 0 | N.A. | 0 |
| UBXN10      | 0,156799231 | 0,184736979  | 0 | N.A. | 0 |
| ATG16L1     | 0,156592777 | 0,289468181  | 0 | N.A. | 0 |
| CTA-212A2.3 | 0,156553963 | 0,223339561  | 0 | N.A. | 0 |
| RELL1       | 0,156537939 | 0,527431496  | 0 | N.A. | 0 |
| BCL2L2      | 0,156530005 | 0,282956009  | 0 | N.A. | 0 |
| RP3-510D11. | 0,156404266 | 0,186379191  | 0 | N.A. | 0 |
| RP11-154J22 | 0,156378578 | 0,003213942  | 0 | N.A. | 0 |
| VANGL1      | 0,156327341 | 0,288362551  | 0 | N.A. | 0 |
| RP11-408A13 | 0,156301752 | 0,303253642  | 0 | N.A. | 0 |
| ZNF664      | 0,156227428 | 0,147472679  | 0 | N.A. | 0 |
| RP11-98D18. | 0,156151583 | -0,347142557 | 0 | N.A. | 0 |
| ZNF417      | 0,156111393 | 0,439053941  | 0 | N.A. | 0 |
| CUL7        | 0,156059371 | 0,068104355  | 0 | N.A. | 0 |
| NCOA4       | 0,156016397 | 0,339114449  | 0 | N.A. | 0 |
| LIPG        | 0,155999952 | 0,116690202  | 0 | N.A. | 0 |
| RP11-801F7. | 0,155976179 | 0,120546822  | 0 | N.A. | 0 |
| RP11-544A12 | 0,155911293 | -0,04916793  | 0 | N.A. | 0 |
| DMXL2       | 0,15585568  | 0,141848243  | 0 | N.A. | 0 |
| AC010883.5  | 0,15582673  | 0,207543888  | 0 | N.A. | 0 |
| SYCE1L      | 0,155800566 | 0,008414246  | 0 | N.A. | 0 |
| TTC9B       | 0,155798708 | -0,05064371  | 0 | N.A. | 0 |
| LINC01022   | 0,155758519 | 0,116475093  | 0 | N.A. | 0 |
| LINC00973   | 0,155673942 | 0,015882872  | 0 | N.A. | 0 |
| GALR2       | 0,155638741 | -0,001213609 | 0 | N.A. | 0 |
| IL1R2       | 0,15563015  | 0,217638066  | 0 | N.A. | 0 |
| C1orf132    | 0,155616721 | 0,028969508  | 0 | N.A. | 0 |
| CASKIN2     | 0,155594866 | 0,313495974  | 0 | N.A. | 0 |
| NCOA6       | 0,155589918 | 0,486577066  | 0 | N.A. | 0 |
| CDS2        | 0,155554134 | 0,072645176  | 0 | N.A. | 0 |
| CTB-129P6.4 | 0,155531291 | 0,179576521  | 0 | N.A. | 0 |
| SERTAD4-AS1 | 0,155425715 | 0,101131571  | 0 | N.A. | 0 |

|             |             |              |   |      |   |
|-------------|-------------|--------------|---|------|---|
| RP11-16E12. | 0,155420115 | -0,064893133 | 0 | N.A. | 0 |
| PKD1        | 0,155396081 | 0,275645027  | 0 | N.A. | 0 |
| PCNXL3      | 0,155342257 | 0,30063558   | 0 | N.A. | 0 |
| ZC3H12C     | 0,155299629 | 0,016841611  | 0 | N.A. | 0 |
| FAM83B      | 0,15517908  | 0,178014283  | 0 | N.A. | 0 |
| BAHD1       | 0,15516255  | -0,018634258 | 0 | N.A. | 0 |
| GPR82       | 0,155097656 | 0,062563516  | 0 | N.A. | 0 |
| RP11-54C4.3 | 0,155057681 | -0,172935788 | 0 | N.A. | 0 |
| FAM174A     | 0,155046366 | -0,090961985 | 0 | N.A. | 0 |
| CCDC93      | 0,154966531 | 0,387904699  | 0 | N.A. | 0 |
| MOB1B       | 0,154921702 | 0,337432767  | 0 | N.A. | 0 |
| SOD3        | 0,15489182  | 0,191119096  | 0 | N.A. | 0 |
| PLEKHM3     | 0,154851915 | -0,004042726 | 0 | N.A. | 0 |
| EOGT        | 0,154816397 | -0,075980826 | 0 | N.A. | 0 |
| OLFM1       | 0,154752721 | -0,036169752 | 0 | N.A. | 0 |
| RP5-1059L7. | 0,154730604 | 0,314152213  | 0 | N.A. | 0 |
| PRODH       | 0,154727233 | 0,065360439  | 0 | N.A. | 0 |
| HEBP1       | 0,154662021 | 0,185548239  | 0 | N.A. | 0 |
| RP11-138A9. | 0,154610817 | 0,441527335  | 0 | N.A. | 0 |
| RP11-355B11 | 0,154570925 | -0,067320855 | 0 | N.A. | 0 |
| HOXD11      | 0,154562089 | 0,235882336  | 0 | N.A. | 0 |
| ANKRD62     | 0,154516259 | -0,110334218 | 0 | N.A. | 0 |
| SLCO4A1-AS1 | 0,154474259 | 0,094489274  | 0 | N.A. | 0 |
| SLC14A1     | 0,154468795 | -0,288384079 | 0 | N.A. | 0 |
| KRT13       | 0,154437221 | 0,124386989  | 0 | N.A. | 0 |
| PRKG2       | 0,154420116 | -0,020241994 | 0 | N.A. | 0 |
| DDI2        | 0,154315914 | 0,236187531  | 0 | N.A. | 0 |
| SNTB1       | 0,154237694 | -0,135673079 | 0 | N.A. | 0 |
| PLXNC1      | 0,154206711 | 0,006289129  | 0 | N.A. | 0 |
| PLEKHH3     | 0,15417644  | 0,148222199  | 0 | N.A. | 0 |
| TSPAN17     | 0,154124663 | -0,2139024   | 0 | N.A. | 0 |
| RP11-338N10 | 0,154121056 |              | 0 | N.A. | 0 |
| DOC2B       | 0,154090089 | -0,177174059 | 0 | N.A. | 0 |

|              |             |              |   |      |   |
|--------------|-------------|--------------|---|------|---|
| FUT4         | 0,154085947 | 0,318776842  | 0 | N.A. | 0 |
| C2orf61      | 0,154067115 | 0,154577546  | 0 | N.A. | 0 |
| RP11-244F12  | 0,154037099 | 0,117620321  | 0 | N.A. | 0 |
| C1orf21      | 0,154023268 | 0,128821625  | 0 | N.A. | 0 |
| CSAD         | 0,153955122 | 0,146562104  | 0 | N.A. | 0 |
| INPP4A       | 0,153880221 | 0,25613314   | 0 | N.A. | 0 |
| DDIT4        | 0,153804183 | 0,625657038  | 0 | N.A. | 0 |
| VPS37C       | 0,153750672 | 0,022085114  | 0 | N.A. | 0 |
| ARMCX3       | 0,153739046 | 0,122531627  | 0 | N.A. | 0 |
| NPNT         | 0,153726863 | 0,303434738  | 0 | N.A. | 0 |
| MMP23B       | 0,153584375 | 0,133499161  | 0 | N.A. | 0 |
| RNF10        | 0,153555372 | -0,103729872 | 0 | N.A. | 0 |
| GCNT4        | 0,153547269 | 0,209563104  | 0 | N.A. | 0 |
| RP11-146N18  | 0,153484836 | -0,203102141 | 0 | N.A. | 0 |
| RP11-1072A3  | 0,153440474 |              | 0 | N.A. | 0 |
| TMPRSS5      | 0,153404194 | -0,120972249 | 0 | N.A. | 0 |
| CTD-2515O1   | 0,15339906  | 0,034245969  | 0 | N.A. | 0 |
| PCDHGB5      | 0,15335842  |              | 0 | N.A. | 0 |
| ZNF440       | 0,153337719 | 0,264145232  | 0 | N.A. | 0 |
| DHX58        | 0,153330981 | 0,240867977  | 0 | N.A. | 0 |
| RP11-477N3.  | 0,153327634 |              | 0 | N.A. | 0 |
| PBXIP1       | 0,153305169 | 0,293559132  | 0 | N.A. | 0 |
| RP11-95P13.  | 0,153231179 | 0,196472035  | 0 | N.A. | 0 |
| PHYHIP       | 0,153168766 | 0,073717546  | 0 | N.A. | 0 |
| RP11-20I23.1 | 0,153139438 | 0,330927937  | 0 | N.A. | 0 |
| LGALS8       | 0,153086358 | 0,460762417  | 0 | N.A. | 0 |
| PLEK2        | 0,153056603 | 0,252814437  | 0 | N.A. | 0 |
| SLC30A7      | 0,153027331 | 0,370392291  | 0 | N.A. | 0 |
| ITGA11       | 0,15301331  | -0,089959021 | 0 | N.A. | 0 |
| AC003092.1   | 0,152990019 |              | 0 | N.A. | 0 |
| RP11-279O9.  | 0,152985092 | 0,25141587   | 0 | N.A. | 0 |
| FKBP14       | 0,152970819 | -0,055327097 | 0 | N.A. | 0 |
| CUL3         | 0,152888264 | 0,352572935  | 0 | N.A. | 0 |

|              |             |              |   |      |   |
|--------------|-------------|--------------|---|------|---|
| MT-ATP8      | 0,152873397 | -0,060050669 | 0 | N.A. | 0 |
| SPOCD1       | 0,152838492 | 0,326095397  | 0 | N.A. | 0 |
| CTD-2260A1   | 0,152833983 | 0,380661066  | 0 | N.A. | 0 |
| NIPAL2       | 0,152722606 | 0,162092638  | 0 | N.A. | 0 |
| KRT83        | 0,152683933 | -0,014083432 | 0 | N.A. | 0 |
| RP11-794G24  | 0,152644598 | 0,177042325  | 0 | N.A. | 0 |
| TPST1        | 0,152552738 | -0,201220768 | 0 | N.A. | 0 |
| RP5-905G11   | 0,152464654 |              | 0 | N.A. | 0 |
| PPM1M        | 0,152371834 | -0,131441125 | 0 | N.A. | 0 |
| RP11-90D4.3  | 0,152281721 | -0,090979408 | 0 | N.A. | 0 |
| PCLO         | 0,152152946 | 0,327614521  | 0 | N.A. | 0 |
| TOX4         | 0,152146113 | 0,184146953  | 0 | N.A. | 0 |
| GRID2IP      | 0,152118468 | 0,266916874  | 0 | N.A. | 0 |
| RP11-799B12  | 0,152110718 | -0,011688522 | 0 | N.A. | 0 |
| PNMA1        | 0,152083938 | 0,418967138  | 0 | N.A. | 0 |
| HCG27        | 0,152039846 | 0,369263066  | 0 | N.A. | 0 |
| FOXK1        | 0,152024694 | 0,029822252  | 0 | N.A. | 0 |
| TBC1D3L      | 0,152008468 | 0,234777592  | 0 | N.A. | 0 |
| CMTM3        | 0,152006665 | -0,085324255 | 0 | N.A. | 0 |
| MPEG1        | 0,151999847 | -0,078587418 | 0 | N.A. | 0 |
| TAL1         | 0,151956403 |              | 0 | N.A. | 0 |
| MIER1        | 0,151939776 | 0,004695039  | 0 | N.A. | 0 |
| SGK2         | 0,151806398 | -0,197206115 | 0 | N.A. | 0 |
| ZDHC20       | 0,151788372 | 0,484015114  | 0 | N.A. | 0 |
| EXOC8        | 0,151774197 | -0,159119031 | 0 | N.A. | 0 |
| ANKRD28      | 0,151738794 | -0,356015661 | 0 | N.A. | 0 |
| TRAFD1       | 0,151676942 | 0,495108135  | 0 | N.A. | 0 |
| LAMP5        | 0,151620346 | -0,299971794 | 0 | N.A. | 0 |
| MECP2        | 0,151495636 | 0,178379617  | 0 | N.A. | 0 |
| CTC-367J11.1 | 0,151441847 | -0,089480548 | 0 | N.A. | 0 |
| TCTEX1D4     | 0,151403385 | 0,20024315   | 0 | N.A. | 0 |
| LGALS9B      | 0,151326619 | 0,145903563  | 0 | N.A. | 0 |
| FAM150A      | 0,151297609 | -0,133998447 | 0 | N.A. | 0 |

|             |             |              |   |      |   |
|-------------|-------------|--------------|---|------|---|
| GATM        | 0,151295617 | -0,075965624 | 0 | N.A. | 0 |
| FBXO6       | 0,151270407 | 0,123242759  | 0 | N.A. | 0 |
| RP11-47901  | 0,151255813 |              | 0 | N.A. | 0 |
| RASGEF1B    | 0,151233062 | -0,144949963 | 0 | N.A. | 0 |
| FOXP3       | 0,151223653 | -0,075499705 | 0 | N.A. | 0 |
| RP11-254F7. | 0,151182662 | 0,086920805  | 0 | N.A. | 0 |
| RP11-4104.1 | 0,151029237 | 0,058488604  | 0 | N.A. | 0 |
| CRIPAK      | 0,151027574 | 0,182492172  | 0 | N.A. | 0 |
| EFEMP2      | 0,150991564 | 0,079854669  | 0 | N.A. | 0 |
| COG5        | 0,150986556 | 0,460767935  | 0 | N.A. | 0 |
| CHMP6       | 0,150959112 | 0,139717541  | 0 | N.A. | 0 |
| ZNF358      | 0,150906998 | 0,132298675  | 0 | N.A. | 0 |
| RP11-326C3. | 0,150879547 |              | 0 | N.A. | 0 |
| SMAD4       | 0,150720242 | 0,167109686  | 0 | N.A. | 0 |
| AC090616.2  | 0,150689296 | 0,204157     | 0 | N.A. | 0 |
| UBQLN2      | 0,150667543 | 0,334553312  | 0 | N.A. | 0 |
| SPTBN5      | 0,150650829 | 0,30431791   | 0 | N.A. | 0 |
| C1orf198    | 0,150631056 | -0,088170418 | 0 | N.A. | 0 |
| MAPK1       | 0,15058093  | 0,249778272  | 0 | N.A. | 0 |
| N4BP2L2     | 0,150558586 | 0,305142678  | 0 | N.A. | 0 |
| LY6G6E      | 0,150539206 | 0,169383774  | 0 | N.A. | 0 |
| PRR16       | 0,150486749 |              | 0 | N.A. | 0 |
| CITED4      | 0,150393651 | 0,200807295  | 0 | N.A. | 0 |
| RP11-214K3. | 0,15037398  | -0,327510683 | 0 | N.A. | 0 |
| BNIP2       | 0,150316434 | 0,383225915  | 0 | N.A. | 0 |
| ZNF726      | 0,150308018 |              | 0 | N.A. | 0 |
| PRICKLE1    | 0,150234451 |              | 0 | N.A. | 0 |
| ZNF213      | 0,150207458 | -0,14308626  | 0 | N.A. | 0 |
| ZNF80       | 0,150196399 |              | 0 | N.A. | 0 |
| GINM1       | 0,150164436 | 0,228734134  | 0 | N.A. | 0 |
| RP11-894P9. | 0,1500181   | 0,09448708   | 0 | N.A. | 0 |
| RP11-385D13 | 0,150003478 | 0,305019063  | 0 | N.A. | 0 |
| RP11-840I19 | 0,149914251 |              | 0 | N.A. | 0 |

|             |             |              |   |      |   |
|-------------|-------------|--------------|---|------|---|
| DMWD        | 0,149895871 | 0,211534555  | 0 | N.A. | 0 |
| GPR39       | 0,149893884 | 0,256456804  | 0 | N.A. | 0 |
| RP4-536B24. | 0,149884201 | 0,351044819  | 0 | N.A. | 0 |
| SLC2A12     | 0,149868551 | 0,332424835  | 0 | N.A. | 0 |
| RNF167      | 0,149858805 | 0,194445249  | 0 | N.A. | 0 |
| RP5-1142A6. | 0,149858329 |              | 0 | N.A. | 0 |
| RP11-536G4. | 0,149828031 |              | 0 | N.A. | 0 |
| APC         | 0,149790473 | 0,10199824   | 0 | N.A. | 0 |
| RP11-378J18 | 0,14978996  | -0,061096937 | 0 | N.A. | 0 |
| OPHN1       | 0,149691382 | 0,173726849  | 0 | N.A. | 0 |
| GCOM1       | 0,149684916 | -0,052745406 | 0 | N.A. | 0 |
| NCMAP       | 0,14967562  | -0,171922024 | 0 | N.A. | 0 |
| CRYM-AS1    | 0,149673204 | 0,063217381  | 0 | N.A. | 0 |
| RP13-870H1  | 0,149631615 | 0,250255956  | 0 | N.A. | 0 |
| OTUD4       | 0,149574249 | 0,239351813  | 0 | N.A. | 0 |
| WDR44       | 0,14956773  | 0,104893032  | 0 | N.A. | 0 |
| DHRS7       | 0,149514552 | 0,374425933  | 0 | N.A. | 0 |
| AMMECR1L    | 0,149464055 | 0,072446131  | 0 | N.A. | 0 |
| CCNY        | 0,149372409 | -0,012132196 | 0 | N.A. | 0 |
| ARL10       | 0,149309081 | -0,141841847 | 0 | N.A. | 0 |
| LINC00685   | 0,149218143 | 0,332158447  | 0 | N.A. | 0 |
| ABHD15      | 0,149190427 | 0,272807104  | 0 | N.A. | 0 |
| PCAT6       | 0,149044383 | 0,279327172  | 0 | N.A. | 0 |
| CLK3        | 0,149023309 | 0,092031347  | 0 | N.A. | 0 |
| RAB1B       | 0,148862332 | 0,205626652  | 0 | N.A. | 0 |
| RBM33       | 0,148852219 | 0,422512125  | 0 | N.A. | 0 |
| KIAA1614    | 0,148830409 | -0,005132774 | 0 | N.A. | 0 |
| PRKACA      | 0,148696917 | 0,051604381  | 0 | N.A. | 0 |
| MKL1        | 0,148667526 | 0,018387624  | 0 | N.A. | 0 |
| ASPRV1      | 0,148644555 | 0,216559638  | 0 | N.A. | 0 |
| LINC00511   | 0,148630634 | 0,319625022  | 0 | N.A. | 0 |
| GTDC1       | 0,148565235 | -0,111975787 | 0 | N.A. | 0 |
| RP1-117B12. | 0,148500687 | 0,224993816  | 0 | N.A. | 0 |

|             |             |              |   |      |   |
|-------------|-------------|--------------|---|------|---|
| HYPM        | 0,148440125 |              | 0 | N.A. | 0 |
| SUPT6H      | 0,148403784 | 0,3164283    | 0 | N.A. | 0 |
| IER5L       | 0,148385428 | 0,503172807  | 0 | N.A. | 0 |
| KAZN        | 0,148351782 | 0,123820494  | 0 | N.A. | 0 |
| KCTD5       | 0,148330283 | 0,319593296  | 0 | N.A. | 0 |
| CPPED1      | 0,148318549 | 0,140705695  | 0 | N.A. | 0 |
| FOSB        | 0,148304706 | 0,08909217   | 0 | N.A. | 0 |
| GS1-124K5.1 | 0,148283127 | -0,108709465 | 0 | N.A. | 0 |
| MOB3A       | 0,148208551 | -0,101916218 | 0 | N.A. | 0 |
| TWSG1       | 0,148184025 | -0,085597337 | 0 | N.A. | 0 |
| LINC00346   | 0,148178178 | 0,322301188  | 0 | N.A. | 0 |
| EDN3        | 0,148130642 | 0,310012812  | 0 | N.A. | 0 |
| TBC1D25     | 0,148118933 | -0,193714245 | 0 | N.A. | 0 |
| UBR3        | 0,148083799 | 0,125844198  | 0 | N.A. | 0 |
| LINC00162   | 0,14799232  |              | 0 | N.A. | 0 |
| CRY1        | 0,147913542 | 0,055801528  | 0 | N.A. | 0 |
| BRINP1      | 0,14790957  | 0,258296158  | 0 | N.A. | 0 |
| EPG5        | 0,147903443 | 0,20630095   | 0 | N.A. | 0 |
| RP11-661A12 | 0,147884299 | -0,349072274 | 0 | N.A. | 0 |
| MRVI1       | 0,147810476 | -0,233934221 | 0 | N.A. | 0 |
| UBQLNL      | 0,147790605 | 0,133991691  | 0 | N.A. | 0 |
| SLC44A2     | 0,147767137 | 0,268296564  | 0 | N.A. | 0 |
| PLCL2       | 0,147756948 | -0,043095251 | 0 | N.A. | 0 |
| WISP1       | 0,147749605 | 0,095880697  | 0 | N.A. | 0 |
| PIK3CD      | 0,147746253 | 0,051059644  | 0 | N.A. | 0 |
| RP11-402G3. | 0,147736147 |              | 0 | N.A. | 0 |
| RP11-329B9. | 0,147682387 | -0,11442218  | 0 | N.A. | 0 |
| MED14OS     | 0,14762647  | -0,043865692 | 0 | N.A. | 0 |
| IRGQ        | 0,14757254  | 0,147259752  | 0 | N.A. | 0 |
| SLC38A10    | 0,147511143 | 0,384135483  | 0 | N.A. | 0 |
| SNX8        | 0,147437066 | 0,279097524  | 0 | N.A. | 0 |
| TBX3        | 0,147349731 | 0,139295211  | 0 | N.A. | 0 |
| ITM2B       | 0,147335672 | 0,257276661  | 0 | N.A. | 0 |



|             |             |              |   |      |   |
|-------------|-------------|--------------|---|------|---|
| AHCYL1      | 0,147200182 | 0,305570518  | 0 | N.A. | 0 |
| BCO1        | 0,147164001 | 0,384773012  | 0 | N.A. | 0 |
| MXD4        | 0,147155791 | 0,017189651  | 0 | N.A. | 0 |
| USP4        | 0,147152441 | 0,132395224  | 0 | N.A. | 0 |
| WDR91       | 0,147103602 | 0,076149639  | 0 | N.A. | 0 |
| ARHGEF7     | 0,147083623 | 0,364573208  | 0 | N.A. | 0 |
| VPS37A      | 0,147045408 | 0,120729841  | 0 | N.A. | 0 |
| FAM26F      | 0,14704215  | -0,19639393  | 0 | N.A. | 0 |
| SPTLC1      | 0,147031268 | 0,151740893  | 0 | N.A. | 0 |
| ZNF568      | 0,147018346 | 0,199893333  | 0 | N.A. | 0 |
| LACC1       | 0,146993113 | 0,091598638  | 0 | N.A. | 0 |
| AP001631.9  | 0,146887154 | 0,048700154  | 0 | N.A. | 0 |
| ATP6V0D1    | 0,146883712 | 0,234131926  | 0 | N.A. | 0 |
| IYD         | 0,146879547 | -0,163892806 | 0 | N.A. | 0 |
| PDZD7       | 0,146871302 | -0,265452709 | 0 | N.A. | 0 |
| EIF1AD      | 0,146828614 | 0,277769464  | 0 | N.A. | 0 |
| RP11-138A9. | 0,146794622 | -0,286991853 | 0 | N.A. | 0 |
| NCF1        | 0,146783305 | -0,037797695 | 0 | N.A. | 0 |
| CASC8       | 0,146778639 | 0,029994848  | 0 | N.A. | 0 |
| ADTRP       | 0,146766061 | 0,197045198  | 0 | N.A. | 0 |
| FAM53C      | 0,146744408 | -0,011811903 | 0 | N.A. | 0 |
| USP31       | 0,146722503 | 0,113712559  | 0 | N.A. | 0 |
| UMAD1       | 0,146719636 | -0,113405811 | 0 | N.A. | 0 |
| RP11-15H20. | 0,146701357 | 0,077520768  | 0 | N.A. | 0 |
| RP4-657D16. | 0,146651432 | 0,481539684  | 0 | N.A. | 0 |
| LGMMN       | 0,146614249 | 0,350104011  | 0 | N.A. | 0 |
| AC006273.4  | 0,146556966 | 0,063641639  | 0 | N.A. | 0 |
| RP11-380J14 | 0,146546479 | 7,60501E-05  | 0 | N.A. | 0 |
| RP11-473M2  | 0,146521124 | 0,168872852  | 0 | N.A. | 0 |
| NOVA2       | 0,14651833  | 0,399332538  | 0 | N.A. | 0 |
| MFSD10      | 0,146471238 | 0,326551322  | 0 | N.A. | 0 |
| RP11-993B23 | 0,146463527 |              | 0 | N.A. | 0 |
| ZNF564      | 0,146379165 | 0,01594993   | 0 | N.A. | 0 |

|             |             |              |   |      |   |
|-------------|-------------|--------------|---|------|---|
| NRG4        | 0,146337686 | 0,042909635  | 0 | N.A. | 0 |
| IKBKE       | 0,146325511 | 0,208742873  | 0 | N.A. | 0 |
| RNF7        | 0,146298302 | 0,226216359  | 0 | N.A. | 0 |
| RAB11B      | 0,146293811 | -0,023766428 | 0 | N.A. | 0 |
| GPB1        | 0,146279974 | 0,059440642  | 0 | N.A. | 0 |
| RP11-534L20 | 0,146265361 |              | 0 | N.A. | 0 |
| TOR1AIP1    | 0,146263105 | 0,059330583  | 0 | N.A. | 0 |
| CDK9        | 0,146213762 | 0,152155899  | 0 | N.A. | 0 |
| ROCK2       | 0,146192599 | 0,372621469  | 0 | N.A. | 0 |
| ATP1A2      | 0,146180396 |              | 0 | N.A. | 0 |
| MYLK        | 0,146168283 | 0,206601968  | 0 | N.A. | 0 |
| SND1-IT1    | 0,146151715 | 0,34442711   | 0 | N.A. | 0 |
| RP11-626G11 | 0,14614606  | 0,005572794  | 0 | N.A. | 0 |
| MROH7       | 0,146017138 | -0,060072278 | 0 | N.A. | 0 |
| RP11-996F15 | 0,145956047 | 0,06640897   | 0 | N.A. | 0 |
| ADRA2A      | 0,145942486 | 0,064752541  | 0 | N.A. | 0 |
| RHBDD1      | 0,145884136 | -0,175703211 | 0 | N.A. | 0 |
| AC069513.4  | 0,145863749 | -0,06235931  | 0 | N.A. | 0 |
| WNT9A       | 0,145837947 | 0,072575711  | 0 | N.A. | 0 |
| IKBKG       | 0,145833746 | -0,017454992 | 0 | N.A. | 0 |
| MSMB        | 0,145786673 | 0,145804909  | 0 | N.A. | 0 |
| RP11-551L14 | 0,145752215 | -0,203455361 | 0 | N.A. | 0 |
| ZDHHC7      | 0,145674544 | 0,292216005  | 0 | N.A. | 0 |
| OFD1        | 0,145630467 | 0,315537126  | 0 | N.A. | 0 |
| PLXND1      | 0,145502689 | -0,139563796 | 0 | N.A. | 0 |
| EME2        | 0,14547873  | 0,422656998  | 0 | N.A. | 0 |
| IGLV1-51    | 0,145368363 | -0,018483903 | 0 | N.A. | 0 |
| GOLGA4      | 0,14535089  | 0,347415121  | 0 | N.A. | 0 |
| RP11-195F19 | 0,145206242 | -0,046975342 | 0 | N.A. | 0 |
| MYL12B      | 0,145195379 | 0,05206527   | 0 | N.A. | 0 |
| THSD4       | 0,145078245 | 0,359445524  | 0 | N.A. | 0 |
| RNF144B     | 0,145058499 | -0,119804757 | 0 | N.A. | 0 |
| DTNA        | 0,14502863  | 0,007449538  | 0 | N.A. | 0 |

|             |             |              |   |      |   |
|-------------|-------------|--------------|---|------|---|
| GREB1L      | 0,145004843 | 0,157632266  | 0 | N.A. | 0 |
| FGD5        | 0,144957944 | 0,247167588  | 0 | N.A. | 0 |
| NT5DC4      | 0,144893815 | 0,441901986  | 0 | N.A. | 0 |
| IQSEC1      | 0,144837593 | 0,049377672  | 0 | N.A. | 0 |
| THEMIS2     | 0,144760616 | 0,354915055  | 0 | N.A. | 0 |
| TRAF1       | 0,1447524   | 0,087575885  | 0 | N.A. | 0 |
| TMEM179B    | 0,144722144 | 0,315788254  | 0 | N.A. | 0 |
| IGF2BP3     | 0,144707072 | 0,005585439  | 0 | N.A. | 0 |
| CALB1       | 0,144700643 | 0,110725561  | 0 | N.A. | 0 |
| LINC01420   | 0,144613339 | -0,060750519 | 0 | N.A. | 0 |
| MDM4        | 0,144581875 | 0,071741252  | 0 | N.A. | 0 |
| ATG4A       | 0,144564981 | -0,022080988 | 0 | N.A. | 0 |
| USP24       | 0,144549773 | 0,303764015  | 0 | N.A. | 0 |
| AC129778.2  | 0,144448528 |              | 0 | N.A. | 0 |
| AC010967.2  | 0,14441364  | 0,080185685  | 0 | N.A. | 0 |
| RP11-731C17 | 0,144337476 | 0,11037976   | 0 | N.A. | 0 |
| LYSMD3      | 0,144324138 | -0,170270457 | 0 | N.A. | 0 |
| SSH1        | 0,144324135 | 9,29206E-05  | 0 | N.A. | 0 |
| RP11-573D15 | 0,144303105 | 0,113759574  | 0 | N.A. | 0 |
| TMEM79      | 0,144278355 | -0,143036626 | 0 | N.A. | 0 |
| FRYL        | 0,144269375 | 0,171245339  | 0 | N.A. | 0 |
| SH3PXD2B    | 0,14426028  | 0,126644031  | 0 | N.A. | 0 |
| GMEB1       | 0,144237039 | 0,226052445  | 0 | N.A. | 0 |
| RASA4       | 0,144144366 | 0,235545152  | 0 | N.A. | 0 |
| RNF139      | 0,144134128 | 0,393190455  | 0 | N.A. | 0 |
| B3GALT6     | 0,144079995 | 0,019989847  | 0 | N.A. | 0 |
| PGM3        | 0,144028392 | 0,103758028  | 0 | N.A. | 0 |
| RP11-400F19 | 0,144023949 | 0,223444395  | 0 | N.A. | 0 |
| FRMD1       | 0,14384091  | 0,242041358  | 0 | N.A. | 0 |
| RP11-297D21 | 0,143765691 | -0,278105327 | 0 | N.A. | 0 |
| TMEM151A    | 0,143744918 | 0,102038827  | 0 | N.A. | 0 |
| GTF2B       | 0,143738039 | 0,308696242  | 0 | N.A. | 0 |
| RP11-90M2.5 | 0,143730444 | 0,002287068  | 0 | N.A. | 0 |

|             |             |              |   |      |   |
|-------------|-------------|--------------|---|------|---|
| GOLPH3L     | 0,143684366 | 0,065232602  | 0 | N.A. | 0 |
| TMEM9B      | 0,143662999 | 0,376884629  | 0 | N.A. | 0 |
| LINC00894   | 0,143564612 | 0,017831713  | 0 | N.A. | 0 |
| C18orf65    | 0,143526865 | -0,17147992  | 0 | N.A. | 0 |
| SHBG        | 0,143525891 |              | 0 | N.A. | 0 |
| ATF7IP      | 0,143523632 | 0,077136343  | 0 | N.A. | 0 |
| LINC00460   | 0,143511498 | 0,119498501  | 0 | N.A. | 0 |
| TMEM154     | 0,143456291 | 0,221558218  | 0 | N.A. | 0 |
| PTPN9       | 0,143455517 | 0,105097979  | 0 | N.A. | 0 |
| MTRNR2L10   | 0,143445919 | 0,362470726  | 0 | N.A. | 0 |
| RUNX3       | 0,143365524 | 0,247100723  | 0 | N.A. | 0 |
| LONRF1      | 0,143335429 | -0,346437984 | 0 | N.A. | 0 |
| LURAP1L-AS1 | 0,143297081 | 0,109393853  | 0 | N.A. | 0 |
| ENTPD5      | 0,143284332 | 0,034695902  | 0 | N.A. | 0 |
| SDC3        | 0,143217346 | 0,231931008  | 0 | N.A. | 0 |
| ARL14EPL    | 0,143214579 |              | 0 | N.A. | 0 |
| CDC14A      | 0,143176312 | 0,250457521  | 0 | N.A. | 0 |
| TRAPPC10    | 0,143157551 | 0,195677305  | 0 | N.A. | 0 |
| F2RL3       | 0,143133307 | -0,011522135 | 0 | N.A. | 0 |
| HGD         | 0,143095892 | 0,064590994  | 0 | N.A. | 0 |
| ZBTB22      | 0,143091339 | 0,056374562  | 0 | N.A. | 0 |
| FAM73B      | 0,143075078 | 0,00645156   | 0 | N.A. | 0 |
| MMP2        | 0,14301972  | 0,068739587  | 0 | N.A. | 0 |
| NR6A1       | 0,142996581 | 0,201791279  | 0 | N.A. | 0 |
| GRAMD1C     | 0,142992948 | -0,133358175 | 0 | N.A. | 0 |
| USP30-AS1   | 0,142948505 | 0,173614687  | 0 | N.A. | 0 |
| BCR         | 0,142788751 | 0,183362011  | 0 | N.A. | 0 |
| ZNF334      | 0,142788704 | -0,164666014 | 0 | N.A. | 0 |
| KIAA1549L   | 0,142739428 | -0,02841611  | 0 | N.A. | 0 |
| SRXN1       | 0,142737709 |              | 0 | N.A. | 0 |
| PPM1B       | 0,142605741 | 0,009058832  | 0 | N.A. | 0 |
| ZNF225      | 0,142556624 | -0,076553927 | 0 | N.A. | 0 |
| PRSS16      | 0,14252937  | -0,202918159 | 0 | N.A. | 0 |

|             |             |              |   |      |   |
|-------------|-------------|--------------|---|------|---|
| TINCR       | 0,142415197 | 0,099497385  | 0 | N.A. | 0 |
| MMP25-AS1   | 0,142317066 | -0,120019333 | 0 | N.A. | 0 |
| NXF2B       | 0,142294562 | 0,028975782  | 0 | N.A. | 0 |
| RP5-894A10. | 0,14226476  | -0,042587486 | 0 | N.A. | 0 |
| LILRA2      | 0,142264408 | -0,163852913 | 0 | N.A. | 0 |
| BRAF        | 0,142249958 | 0,142841091  | 0 | N.A. | 0 |
| MANSC4      | 0,142239477 |              | 0 | N.A. | 0 |
| SLC5A2      | 0,142211925 | -0,264068196 | 0 | N.A. | 0 |
| RP11-357P18 | 0,142205448 |              | 0 | N.A. | 0 |
| GLTSCR1L    | 0,142157869 | 0,050759184  | 0 | N.A. | 0 |
| TERF2       | 0,142119251 | 0,13660766   | 0 | N.A. | 0 |
| RP11-207C16 | 0,142091232 | 0,126139807  | 0 | N.A. | 0 |
| C5orf51     | 0,142084154 | -0,132363213 | 0 | N.A. | 0 |
| RAVER1      | 0,141997928 | -0,231658115 | 0 | N.A. | 0 |
| FAM3A       | 0,14191286  | 0,234647943  | 0 | N.A. | 0 |
| KCNJ6       | 0,141865952 |              | 0 | N.A. | 0 |
| CCDC17      | 0,141823626 | 0,076450265  | 0 | N.A. | 0 |
| TRIP11      | 0,141784876 | 0,261897172  | 0 | N.A. | 0 |
| COL1A2      | 0,14177181  | -0,129546195 | 0 | N.A. | 0 |
| FEZF1-AS1   | 0,141672773 | 0,240569416  | 0 | N.A. | 0 |
| AC009950.2  | 0,141664575 |              | 0 | N.A. | 0 |
| ZNF600      | 0,141628978 | 0,509042225  | 0 | N.A. | 0 |
| PARK2       | 0,14162141  | -0,011702793 | 0 | N.A. | 0 |
| FAM213B     | 0,141596414 | 0,480502316  | 0 | N.A. | 0 |
| AIM2        | 0,141584082 | 0,161711827  | 0 | N.A. | 0 |
| CTD-2129N1  | 0,141561244 | 0,124256653  | 0 | N.A. | 0 |
| FAM83F      | 0,141542424 | 0,315446023  | 0 | N.A. | 0 |
| RP11-11490  | 0,141521336 |              | 0 | N.A. | 0 |
| INSL4       | 0,141482176 | 0,14805089   | 0 | N.A. | 0 |
| CAPN1       | 0,141476299 | 0,38732738   | 0 | N.A. | 0 |
| RP11-158H5. | 0,1414381   | 0,250651532  | 0 | N.A. | 0 |
| ANKRD22     | 0,141361748 | 0,049384378  | 0 | N.A. | 0 |
| PTPN13      | 0,141352241 | 0,129005636  | 0 | N.A. | 0 |

|              |             |              |   |      |   |
|--------------|-------------|--------------|---|------|---|
| RP11-245J9.6 | 0,141156059 | 0,045165502  | 0 | N.A. | 0 |
| BACH1-IT2    | 0,141127398 | 0,050767408  | 0 | N.A. | 0 |
| C8orf4       | 0,141084543 | 0,289714432  | 0 | N.A. | 0 |
| MUC5AC       | 0,141080577 | 0,178713402  | 0 | N.A. | 0 |
| RP11-92G12.  | 0,141026993 | 0,077317239  | 0 | N.A. | 0 |
| FAM188A      | 0,141021901 | 0,170971352  | 0 | N.A. | 0 |
| RRNAD1       | 0,140994655 | 0,199226772  | 0 | N.A. | 0 |
| NFATC2IP     | 0,140823443 | 0,235752822  | 0 | N.A. | 0 |
| CAPS         | 0,140806754 | 0,249441688  | 0 | N.A. | 0 |
| SIK1         | 0,140797683 | 0,131677337  | 0 | N.A. | 0 |
| VTN          | 0,140775567 |              | 0 | N.A. | 0 |
| MYOM1        | 0,140695304 | 0,047141735  | 0 | N.A. | 0 |
| AMY2B        | 0,140658052 | 0,363160013  | 0 | N.A. | 0 |
| ZMAT3        | 0,140644493 | -0,090042112 | 0 | N.A. | 0 |
| RP3-467K16.  | 0,140640239 | 0,225124368  | 0 | N.A. | 0 |
| TSHZ1        | 0,140635197 | 0,09934727   | 0 | N.A. | 0 |
| TMEM200A     | 0,140619799 | 0,043804012  | 0 | N.A. | 0 |
| LTBR         | 0,140552368 | 0,415939663  | 0 | N.A. | 0 |
| KIF3C        | 0,140543808 | 0,226823887  | 0 | N.A. | 0 |
| SOWAHB       | 0,140528525 | 0,151627405  | 0 | N.A. | 0 |
| HLA-DOA      | 0,140518594 | -0,204561321 | 0 | N.A. | 0 |
| PLA2G2A      | 0,14051548  | -0,118463729 | 0 | N.A. | 0 |
| CSGALNACT2   | 0,14050984  | 0,158145854  | 0 | N.A. | 0 |
| ATXN7L1      | 0,140464855 | 0,07081366   | 0 | N.A. | 0 |
| ANKRD35      | 0,140460116 |              | 0 | N.A. | 0 |
| PDE6B        | 0,140432249 |              | 0 | N.A. | 0 |
| TIAF1        | 0,14042641  | -0,228636795 | 0 | N.A. | 0 |
| CCND1        | 0,140416792 | 0,718624931  | 0 | N.A. | 0 |
| C7orf57      | 0,140350642 | -0,247890397 | 0 | N.A. | 0 |
| CEACAM3      | 0,140289911 | -0,086957466 | 0 | N.A. | 0 |
| AP000350.5   | 0,140271413 | 0,036450651  | 0 | N.A. | 0 |
| LINC01483    | 0,140267844 | 0,112525999  | 0 | N.A. | 0 |
| TREM1        | 0,140257834 | -0,180156677 | 0 | N.A. | 0 |

|             |             |              |   |      |   |
|-------------|-------------|--------------|---|------|---|
| CST7        | 0,140254283 | -0,036331244 | 0 | N.A. | 0 |
| LRRN1       | 0,140244871 | 0,120019945  | 0 | N.A. | 0 |
| EFNA3       | 0,140229229 | 0,381438736  | 0 | N.A. | 0 |
| RELT        | 0,140216659 | 0,280039378  | 0 | N.A. | 0 |
| CD163L1     | 0,140139919 | -0,057083427 | 0 | N.A. | 0 |
| BSDC1       | 0,140116548 | 0,496052548  | 0 | N.A. | 0 |
| DENND4A     | 0,140089614 | -0,235533707 | 0 | N.A. | 0 |
| HOXB7       | 0,140012805 | 0,47871969   | 0 | N.A. | 0 |
| DCAF5       | 0,13997444  | 0,210479302  | 0 | N.A. | 0 |
| SORT1       | 0,139926853 | 0,232602282  | 0 | N.A. | 0 |
| GAPVD1      | 0,139926731 | 0,23805789   | 0 | N.A. | 0 |
| CA4         | 0,139902055 | 0,212951812  | 0 | N.A. | 0 |
| CTC-444N24. | 0,13982959  | 0,198921128  | 0 | N.A. | 0 |
| OXR1        | 0,139813936 | -0,099467193 | 0 | N.A. | 0 |
| TRIM16      | 0,139812019 | 0,144284439  | 0 | N.A. | 0 |
| ZNF791      | 0,139784613 | 0,241043123  | 0 | N.A. | 0 |
| RP11-317L10 | 0,139766113 | -0,023234573 | 0 | N.A. | 0 |
| EDA         | 0,139698225 | 0,004585049  | 0 | N.A. | 0 |
| LINC00467   | 0,139608262 | 0,080913589  | 0 | N.A. | 0 |
| CRIP2       | 0,139605536 | 0,381109679  | 0 | N.A. | 0 |
| CHMP2A      | 0,139585317 | 0,307613013  | 0 | N.A. | 0 |
| ACKR2       | 0,139526869 | -0,121607728 | 0 | N.A. | 0 |
| SP2         | 0,139514516 | -0,040097628 | 0 | N.A. | 0 |
| CLEC16A     | 0,139487135 | 0,25857988   | 0 | N.A. | 0 |
| BX470102.3  | 0,1394349   | 0,135604836  | 0 | N.A. | 0 |
| CLEC7A      | 0,139434871 | -0,314523478 | 0 | N.A. | 0 |
| RP5-875H18. | 0,139388938 | 0,39018111   | 0 | N.A. | 0 |
| ASCC2       | 0,13934889  | 0,063100902  | 0 | N.A. | 0 |
| NBAS        | 0,139321238 | 0,23481328   | 0 | N.A. | 0 |
| ANXA10      | 0,139317527 | 0,156525475  | 0 | N.A. | 0 |
| ZNF341      | 0,139292974 | 0,07264923   | 0 | N.A. | 0 |
| AP000704.5  | 0,139275704 | -0,322801588 | 0 | N.A. | 0 |
| RP11-195B17 | 0,139262794 | -0,074919772 | 0 | N.A. | 0 |

|              |             |              |   |      |   |
|--------------|-------------|--------------|---|------|---|
| OLFML2A      | 0,139248976 | 0,304134452  | 0 | N.A. | 0 |
| GPRIN1       | 0,139207627 | -0,060587586 | 0 | N.A. | 0 |
| RP11-305L7.4 | 0,139193772 | -8,40519E-05 | 0 | N.A. | 0 |
| PLOD1        | 0,139136106 | 0,025620079  | 0 | N.A. | 0 |
| EFCAB5       | 0,139097015 | -0,196315865 | 0 | N.A. | 0 |
| TTC21A       | 0,139056564 | 0,22522595   | 0 | N.A. | 0 |
| IGLV1-40     | 0,13901411  | -0,26939949  | 0 | N.A. | 0 |
| RP11-211G23  | 0,138996236 | 0,136346247  | 0 | N.A. | 0 |
| TMEM74       | 0,138987563 |              | 0 | N.A. | 0 |
| RP11-374M1   | 0,138964306 | -0,150981849 | 0 | N.A. | 0 |
| ZC3H3        | 0,138923022 | 0,219296276  | 0 | N.A. | 0 |
| RP11-642C5.1 | 0,138881051 |              | 0 | N.A. | 0 |
| DCBLD1       | 0,138870914 | 0,249179063  | 0 | N.A. | 0 |
| ZIC5         | 0,138863014 | 0,076839887  | 0 | N.A. | 0 |
| SNIP1        | 0,138839021 | 0,181824762  | 0 | N.A. | 0 |
| LSAMP-AS1    | 0,138791566 | 0,270755196  | 0 | N.A. | 0 |
| CPE          | 0,138755358 | 0,218231869  | 0 | N.A. | 0 |
| RAB11FIP4    | 0,13862949  | 0,499202024  | 0 | N.A. | 0 |
| CREBL2       | 0,138618981 | -0,184977525 | 0 | N.A. | 0 |
| ARHGEF10L    | 0,138605165 | 0,199825817  | 0 | N.A. | 0 |
| PEX26        | 0,138588726 | 0,290911538  | 0 | N.A. | 0 |
| CD72         | 0,138573312 | 0,050443422  | 0 | N.A. | 0 |
| ENTPD3       | 0,138509142 | -0,092975943 | 0 | N.A. | 0 |
| CDC34        | 0,138473405 | 0,354784857  | 0 | N.A. | 0 |
| AC069277.2   | 0,138387298 | -0,190999739 | 0 | N.A. | 0 |
| MTMR14       | 0,138381939 | -0,141391798 | 0 | N.A. | 0 |
| AC009495.2   | 0,138331982 | 0,03372306   | 0 | N.A. | 0 |
| SLC45A3      | 0,138316779 | 0,086680011  | 0 | N.A. | 0 |
| AC005281.1   | 0,138307602 | 0,210394408  | 0 | N.A. | 0 |
| POU2F3       | 0,138099744 | 0,169524612  | 0 | N.A. | 0 |
| ZNF316       | 0,138044555 | 0,255572014  | 0 | N.A. | 0 |
| LRRTM1       | 0,138014825 | -0,089184637 | 0 | N.A. | 0 |
| RP11-514P8.1 | 0,137932992 | -0,075145808 | 0 | N.A. | 0 |



|             |             |              |   |      |   |
|-------------|-------------|--------------|---|------|---|
| CXCL14      | 0,137910966 | 0,022344072  | 0 | N.A. | 0 |
| NOMO2       | 0,137882949 | -0,006774848 | 0 | N.A. | 0 |
| NEIL1       | 0,137843568 | 0,047997832  | 0 | N.A. | 0 |
| TNIK        | 0,137768496 | 0,099717694  | 0 | N.A. | 0 |
| ATG4D       | 0,137765658 | 0,092855906  | 0 | N.A. | 0 |
| EXOC3L1     | 0,137731565 | 0,268503748  | 0 | N.A. | 0 |
| HELZ        | 0,137702693 | 0,277373598  | 0 | N.A. | 0 |
| AC144831.3  | 0,137660114 | 0,082951627  | 0 | N.A. | 0 |
| RP11-902B17 | 0,137630377 | -0,000563924 | 0 | N.A. | 0 |
| SLC25A18    | 0,137630248 | 0,140134487  | 0 | N.A. | 0 |
| PRKCH       | 0,137625196 | 0,015717356  | 0 | N.A. | 0 |
| CDK2AP2     | 0,137618705 | 0,059734421  | 0 | N.A. | 0 |
| RP11-285E9. | 0,137609764 |              | 0 | N.A. | 0 |
| CH17-140K24 | 0,137554342 | 0,025324605  | 0 | N.A. | 0 |
| LINC-PINT   | 0,137545665 | -0,304665662 | 0 | N.A. | 0 |
| CDKN2AIP    | 0,137487078 | 0,23449144   | 0 | N.A. | 0 |
| SAMD12      | 0,13744879  | 0,178355206  | 0 | N.A. | 0 |
| MARCO       | 0,137391402 | -0,233741249 | 0 | N.A. | 0 |
| RP11-326A19 | 0,137350585 | 0,160851079  | 0 | N.A. | 0 |
| C1RL        | 0,137341449 | 0,067182278  | 0 | N.A. | 0 |
| AC011298.2  | 0,137320888 | -0,038212489 | 0 | N.A. | 0 |
| ARVCF       | 0,137291096 | 0,174050597  | 0 | N.A. | 0 |
| RWDD2A      | 0,137273629 | 0,188309513  | 0 | N.A. | 0 |
| GTF2IRD2B   | 0,137240098 | 0,081718525  | 0 | N.A. | 0 |
| LZTS3       | 0,137208005 | -0,006990862 | 0 | N.A. | 0 |
| RBM5        | 0,137183496 | 0,222650554  | 0 | N.A. | 0 |
| MYRFL       | 0,13714748  | 0,270496272  | 0 | N.A. | 0 |
| PCSK4       | 0,137067335 | 0,037415393  | 0 | N.A. | 0 |
| RAI1        | 0,137048439 | 0,22389665   | 0 | N.A. | 0 |
| AC019117.2  | 0,137003897 | 0,087864818  | 0 | N.A. | 0 |
| STK35       | 0,136974612 | -0,124287741 | 0 | N.A. | 0 |
| CTB-133G6.2 | 0,136907972 | -0,077066879 | 0 | N.A. | 0 |
| USP6        | 0,136785967 | -0,322232085 | 0 | N.A. | 0 |

|             |             |              |   |      |   |
|-------------|-------------|--------------|---|------|---|
| FAM109A     | 0,136742965 | 0,413758197  | 0 | N.A. | 0 |
| PPP3CC      | 0,136724796 | 0,088702146  | 0 | N.A. | 0 |
| TMEM175     | 0,136704978 | 0,399478751  | 0 | N.A. | 0 |
| SAMD12-AS1  | 0,136661247 | 0,18698415   | 0 | N.A. | 0 |
| AXL         | 0,136578774 | -0,085021484 | 0 | N.A. | 0 |
| UBTD1       | 0,136509569 | 0,139623732  | 0 | N.A. | 0 |
| ANKRD10     | 0,136461515 | 0,278009031  | 0 | N.A. | 0 |
| GBF1        | 0,136341892 | 0,153020702  | 0 | N.A. | 0 |
| DNMBP-AS1   | 0,136338449 | -0,336998044 | 0 | N.A. | 0 |
| COPG1       | 0,13632857  | 0,347084045  | 0 | N.A. | 0 |
| EXOC3L4     | 0,136307925 | 0,246067581  | 0 | N.A. | 0 |
| LNX1        | 0,136284586 | 0,008205056  | 0 | N.A. | 0 |
| EBLN2       | 0,136269273 | 0,303404445  | 0 | N.A. | 0 |
| RP11-83B20. | 0,136246246 | -0,034512808 | 0 | N.A. | 0 |
| FBLL1       | 0,136229933 | 0,199943991  | 0 | N.A. | 0 |
| KRT5        | 0,136223892 |              | 0 | N.A. | 0 |
| TBC1D5      | 0,136203676 | -0,055897603 | 0 | N.A. | 0 |
| AC096772.6  | 0,136082398 | 0,173265094  | 0 | N.A. | 0 |
| SRSF5       | 0,135974531 | 0,370948839  | 0 | N.A. | 0 |
| NUPR1L      | 0,13596963  |              | 0 | N.A. | 0 |
| SYT5        | 0,135967233 | 0,053319867  | 0 | N.A. | 0 |
| ERN1        | 0,135934326 | 0,260373515  | 0 | N.A. | 0 |
| GLIS2       | 0,135907924 | -0,020283343 | 0 | N.A. | 0 |
| TMEM211     | 0,135886336 | 0,059238524  | 0 | N.A. | 0 |
| IGHV1-69-2  | 0,135867112 | -0,142838155 | 0 | N.A. | 0 |
| ALOX12-AS1  | 0,135834164 | 0,209815268  | 0 | N.A. | 0 |
| GPR135      | 0,13577533  | 0,049116401  | 0 | N.A. | 0 |
| DRD1        | 0,135700182 | 0,396386422  | 0 | N.A. | 0 |
| ATMIN       | 0,135667712 | 0,068527879  | 0 | N.A. | 0 |
| FSCN2       | 0,135558051 | 0,116919587  | 0 | N.A. | 0 |
| RP11-524F11 | 0,135543508 |              | 0 | N.A. | 0 |
| KCTD20      | 0,135532075 | -0,092872334 | 0 | N.A. | 0 |
| RP11-81A22. | 0,135521414 |              | 0 | N.A. | 0 |

|              |             |              |   |      |   |
|--------------|-------------|--------------|---|------|---|
| ADAMTS2      | 0,135507993 | -0,038715077 | 0 | N.A. | 0 |
| WIZ          | 0,135446864 | 0,358041895  | 0 | N.A. | 0 |
| IGKV1-5      | 0,135421766 | -0,318503247 | 0 | N.A. | 0 |
| RP11-10J21.3 | 0,135407357 | -0,004032885 | 0 | N.A. | 0 |
| RP11-385F5.. | 0,135352425 | 0,006266333  | 0 | N.A. | 0 |
| PLGLB2       | 0,135324902 |              | 0 | N.A. | 0 |
| THY1         | 0,13530763  | -0,238536146 | 0 | N.A. | 0 |
| RASL12       | 0,135259034 | -0,074342446 | 0 | N.A. | 0 |
| MCM3AP       | 0,135193728 | 0,089937739  | 0 | N.A. | 0 |
| GLMP         | 0,135175547 | 0,262580265  | 0 | N.A. | 0 |
| NKIRAS2      | 0,135074888 | 0,193291367  | 0 | N.A. | 0 |
| ACTB         | 0,135041094 | 0,025340914  | 0 | N.A. | 0 |
| RP13-516M1   | 0,134991692 | 0,042357932  | 0 | N.A. | 0 |
| ZNF561       | 0,134989132 | -0,059705837 | 0 | N.A. | 0 |
| ELF1         | 0,134983162 | 0,121636231  | 0 | N.A. | 0 |
| RP11-231E19  | 0,134956244 | 0,061844379  | 0 | N.A. | 0 |
| CSRNP2       | 0,134943588 | 0,389335601  | 0 | N.A. | 0 |
| FBXO48       | 0,134930497 | 0,016334333  | 0 | N.A. | 0 |
| RP11-353N14  | 0,134889777 | 0,088023706  | 0 | N.A. | 0 |
| BIRC7        | 0,134869035 | 0,211508919  | 0 | N.A. | 0 |
| XKR4         | 0,134836978 | 0,00448682   | 0 | N.A. | 0 |
| TNIP3        | 0,134810225 | 0,10527796   | 0 | N.A. | 0 |
| VCAM1        | 0,13479066  | 0,295049547  | 0 | N.A. | 0 |
| GALNT10      | 0,134779818 | 0,199245731  | 0 | N.A. | 0 |
| MCL1         | 0,134728304 | 0,13344491   | 0 | N.A. | 0 |
| KCNMB1       | 0,134727686 | 0,140060441  | 0 | N.A. | 0 |
| RP11-563K23  | 0,134702592 | -0,049583366 | 0 | N.A. | 0 |
| PHF12        | 0,134674916 | 0,300538973  | 0 | N.A. | 0 |
| RUFY2        | 0,134660064 | 0,157023163  | 0 | N.A. | 0 |
| ZDHHHC13     | 0,13464993  | 0,047278216  | 0 | N.A. | 0 |
| ZNF699       | 0,134619402 | 0,280552157  | 0 | N.A. | 0 |
| FAM189A1     | 0,134612423 | 0,19330295   | 0 | N.A. | 0 |
| AC004893.11  | 0,134497405 | 0,295288887  | 0 | N.A. | 0 |

|              |             |              |   |      |   |
|--------------|-------------|--------------|---|------|---|
| TLR4         | 0,134452173 | -0,084231432 | 0 | N.A. | 0 |
| TM2D2        | 0,134433414 | -0,070106039 | 0 | N.A. | 0 |
| HIST2H2AA4   | 0,134432171 | 0,285302823  | 0 | N.A. | 0 |
| PRSS27       | 0,134424522 | 0,093963045  | 0 | N.A. | 0 |
| RARRES1      | 0,134422709 | 0,056789382  | 0 | N.A. | 0 |
| SYNPO2L      | 0,134383105 |              | 0 | N.A. | 0 |
| TMEM9B-AS1   | 0,134222832 | 0,270771547  | 0 | N.A. | 0 |
| EBF1         | 0,134155358 | -0,325742572 | 0 | N.A. | 0 |
| AC009014.3   | 0,134149226 | 0,147354815  | 0 | N.A. | 0 |
| ENTPD7       | 0,134097603 | 0,134984853  | 0 | N.A. | 0 |
| SMPX         | 0,134077289 | -0,057759408 | 0 | N.A. | 0 |
| RP11-468E2.1 | 0,13406508  | 0,099165978  | 0 | N.A. | 0 |
| CCDC88B      | 0,134024173 | 0,222311659  | 0 | N.A. | 0 |
| ITPK1-AS1    | 0,13401501  | -0,089785733 | 0 | N.A. | 0 |
| RP11-38M8.1  | 0,134014593 | 0,027725809  | 0 | N.A. | 0 |
| ABI3BP       | 0,134009462 | -0,074763103 | 0 | N.A. | 0 |
| PLVAP        | 0,134006321 | -0,152163018 | 0 | N.A. | 0 |
| DHRS2        | 0,133959303 | -0,208308892 | 0 | N.A. | 0 |
| BRWD1        | 0,133914676 | 0,361120208  | 0 | N.A. | 0 |
| RP11-416I2.1 | 0,133869359 | 0,003880087  | 0 | N.A. | 0 |
| FGF18        | 0,133839565 | -0,034394167 | 0 | N.A. | 0 |
| CIITA        | 0,133746867 | -0,104308903 | 0 | N.A. | 0 |
| DARS-AS1     | 0,133744217 | -0,041736359 | 0 | N.A. | 0 |
| NOD2         | 0,133738037 | 0,008985307  | 0 | N.A. | 0 |
| AP000487.5   | 0,133706228 | 0,1598802    | 0 | N.A. | 0 |
| CYP2D6       | 0,133593597 | 0,169041272  | 0 | N.A. | 0 |
| DNASE2B      | 0,133566566 |              | 0 | N.A. | 0 |
| PCDHA5       | 0,133439117 |              | 0 | N.A. | 0 |
| RP11-108K3.1 | 0,133410258 | -0,174222381 | 0 | N.A. | 0 |
| MPO          | 0,133341188 |              | 0 | N.A. | 0 |
| ALS2CR12     | 0,133282841 | -0,042477602 | 0 | N.A. | 0 |
| SH2D3C       | 0,133258258 | 0,066220034  | 0 | N.A. | 0 |
| CHRNE        | 0,133228465 |              | 0 | N.A. | 0 |

|              |             |              |   |      |   |
|--------------|-------------|--------------|---|------|---|
| HAP1         | 0,133224769 | 0,539579086  | 0 | N.A. | 0 |
| PAK3         | 0,133204367 |              | 0 | N.A. | 0 |
| SLC3A1       | 0,133134989 | -0,152929141 | 0 | N.A. | 0 |
| INPP5D       | 0,133107769 | -0,018345513 | 0 | N.A. | 0 |
| ERICH6-AS1   | 0,133087135 | -0,237815953 | 0 | N.A. | 0 |
| AC007383.4   | 0,13304422  |              | 0 | N.A. | 0 |
| ANG          | 0,132979369 | 0,378665587  | 0 | N.A. | 0 |
| HEXDC        | 0,132888323 | 0,112701965  | 0 | N.A. | 0 |
| RP11-315I20  | 0,132821021 | 0,200755112  | 0 | N.A. | 0 |
| CAMK4        | 0,132812497 |              | 0 | N.A. | 0 |
| LINC00494    | 0,132804388 |              | 0 | N.A. | 0 |
| ZNF394       | 0,132651028 | -0,011661637 | 0 | N.A. | 0 |
| PCDHGA10     | 0,132647767 | 0,063069984  | 0 | N.A. | 0 |
| SAR1A        | 0,132572324 | 0,379903471  | 0 | N.A. | 0 |
| PTGER1       | 0,13251141  | -0,096636531 | 0 | N.A. | 0 |
| RP11-47I22.2 | 0,132440343 | -0,15043413  | 0 | N.A. | 0 |
| RP11-640N1.1 | 0,132414726 | 0,071647757  | 0 | N.A. | 0 |
| NXPH4        | 0,132388965 | 0,121440363  | 0 | N.A. | 0 |
| PYROXD1      | 0,13222681  | 0,437784059  | 0 | N.A. | 0 |
| GAS6-AS1     | 0,132199469 | 0,183672562  | 0 | N.A. | 0 |
| TRIM62       | 0,132183351 | 0,045839524  | 0 | N.A. | 0 |
| ARHGEF37     | 0,132179704 | 0,015843397  | 0 | N.A. | 0 |
| KCTD2        | 0,132171886 | 0,222495649  | 0 | N.A. | 0 |
| KIAA1211     | 0,132171293 | 0,222224056  | 0 | N.A. | 0 |
| KREMEN2      | 0,132158352 | -0,076540866 | 0 | N.A. | 0 |
| RP11-557C18  | 0,132139399 | -0,131790427 | 0 | N.A. | 0 |
| LIG4         | 0,132089427 | 0,244150866  | 0 | N.A. | 0 |
| CHST1        | 0,132088421 | 0,061489082  | 0 | N.A. | 0 |
| PPM1J        | 0,132026531 | -0,054016619 | 0 | N.A. | 0 |
| CANT1        | 0,132012465 | 0,251820395  | 0 | N.A. | 0 |
| LINC00865    | 0,131981629 | -0,306129441 | 0 | N.A. | 0 |
| SMCR8        | 0,131874126 | 0,055344063  | 0 | N.A. | 0 |
| RP5-884M6.1  | 0,131861812 | -0,021270112 | 0 | N.A. | 0 |

|             |             |              |   |      |   |
|-------------|-------------|--------------|---|------|---|
| RP11-838N2  | 0,131820679 |              | 0 | N.A. | 0 |
| SEMA6D      | 0,131745664 | -0,06998935  | 0 | N.A. | 0 |
| KRT4        | 0,131537902 | 0,203434521  | 0 | N.A. | 0 |
| ATP7B       | 0,131393625 | 0,283908983  | 0 | N.A. | 0 |
| LATS1       | 0,131391578 | 0,391525085  | 0 | N.A. | 0 |
| SERPING1    | 0,131374223 | -0,163483228 | 0 | N.A. | 0 |
| TAF5L       | 0,131323389 | 0,021080018  | 0 | N.A. | 0 |
| RP11-131L23 | 0,13126615  | 0,032067586  | 0 | N.A. | 0 |
| RP11-147L13 | 0,131259885 | 0,209753995  | 0 | N.A. | 0 |
| VWA2        | 0,131210207 | -0,168429107 | 0 | N.A. | 0 |
| ATAD3C      | 0,13117172  | 0,106938649  | 0 | N.A. | 0 |
| RP11-317J10 | 0,131108673 | 0,11430167   | 0 | N.A. | 0 |
| ERVW-1      | 0,131049641 |              | 0 | N.A. | 0 |
| SPP1        | 0,131049228 | -0,169760509 | 0 | N.A. | 0 |
| ERAP2       | 0,131032866 | 0,086718126  | 0 | N.A. | 0 |
| RP11-304F15 | 0,13096823  |              | 0 | N.A. | 0 |
| AGAP5       | 0,130914425 | 0,150104423  | 0 | N.A. | 0 |
| FBXW4       | 0,130859301 | 0,215779273  | 0 | N.A. | 0 |
| RP11-54H7.4 | 0,130790924 | 0,13751943   | 0 | N.A. | 0 |
| SLC3A2      | 0,130784537 | 0,517783121  | 0 | N.A. | 0 |
| CXCL10      | 0,130718943 | 0,338199654  | 0 | N.A. | 0 |
| NFATC4      | 0,130702903 | 0,062499599  | 0 | N.A. | 0 |
| NR1I3       | 0,130680805 |              | 0 | N.A. | 0 |
| LRRC16A     | 0,130675732 | 0,003486792  | 0 | N.A. | 0 |
| UBE2E2      | 0,130650757 | -0,245575413 | 0 | N.A. | 0 |
| WDR27       | 0,130638352 | 0,093170918  | 0 | N.A. | 0 |
| SPATA18     | 0,13055557  | -0,10664966  | 0 | N.A. | 0 |
| DDX3Y       | 0,130521043 | 0,113685483  | 0 | N.A. | 0 |
| RGL3        | 0,130520074 | 0,306602563  | 0 | N.A. | 0 |
| RP11-368L12 | 0,13051267  | -0,024836406 | 0 | N.A. | 0 |
| CCNT1       | 0,130511671 | 0,348541013  | 0 | N.A. | 0 |
| ARPC2       | 0,130423766 | -0,019846064 | 0 | N.A. | 0 |
| TEKT4       | 0,130384224 |              | 0 | N.A. | 0 |

|              |             |              |   |      |   |
|--------------|-------------|--------------|---|------|---|
| MT-ND1       | 0,130344995 | 0,395036326  | 0 | N.A. | 0 |
| RP11-433J8.1 | 0,130287465 | 0,000855496  | 0 | N.A. | 0 |
| SLC22A31     | 0,130148605 |              | 0 | N.A. | 0 |
| SFT2D3       | 0,13009135  | 0,059353931  | 0 | N.A. | 0 |
| ZNF431       | 0,130091272 | 0,518670663  | 0 | N.A. | 0 |
| TRAPPC6B     | 0,129980492 | 0,116780811  | 0 | N.A. | 0 |
| KRTAP13-2    | 0,129961282 | 0,353255453  | 0 | N.A. | 0 |
| LINC00365    | 0,129945025 | -0,065505168 | 0 | N.A. | 0 |
| RP13-188A5.  | 0,129912694 | -0,002419724 | 0 | N.A. | 0 |
| CLEC18C      | 0,129882856 |              | 0 | N.A. | 0 |
| CRTC3        | 0,129847874 | -0,054786978 | 0 | N.A. | 0 |
| CCL22        | 0,129847506 | -0,082172977 | 0 | N.A. | 0 |
| TTN-AS1      | 0,129773806 | 0,24422011   | 0 | N.A. | 0 |
| MEDAG        | 0,129751675 | 0,064861234  | 0 | N.A. | 0 |
| MT1M         | 0,129713014 | -0,133262254 | 0 | N.A. | 0 |
| SLC7A14      | 0,129672237 | 0,235985895  | 0 | N.A. | 0 |
| KLK1         | 0,129657124 | 0,199036017  | 0 | N.A. | 0 |
| CTB-127C13.  | 0,129652033 | -0,327425464 | 0 | N.A. | 0 |
| BRAP         | 0,129595521 | -0,133632381 | 0 | N.A. | 0 |
| CREB5        | 0,129588752 | 0,146884549  | 0 | N.A. | 0 |
| BVES         | 0,129578595 | 0,276828575  | 0 | N.A. | 0 |
| MAPK8IP2     | 0,129537902 | 0,067204007  | 0 | N.A. | 0 |
| KB-1125A3.1  | 0,129505198 | 0,194533208  | 0 | N.A. | 0 |
| SLIT1        | 0,129491867 | -0,032284543 | 0 | N.A. | 0 |
| RP4-591C20.  | 0,129439712 | 0,230122786  | 0 | N.A. | 0 |
| CD151        | 0,129426793 | 0,734132696  | 0 | N.A. | 0 |
| LYG1         | 0,129322456 | 0,079053687  | 0 | N.A. | 0 |
| GK-AS1       | 0,12930376  | 0,063444968  | 0 | N.A. | 0 |
| RNF217       | 0,129259333 | 0,295116297  | 0 | N.A. | 0 |
| BAK1         | 0,129238092 | 0,086760397  | 0 | N.A. | 0 |
| MDM2         | 0,129221754 | 0,026212792  | 0 | N.A. | 0 |
| SLC2A14      | 0,12920758  |              | 0 | N.A. | 0 |
| SIRPA        | 0,129203092 | 0,11400788   | 0 | N.A. | 0 |

|             |             |              |   |      |   |
|-------------|-------------|--------------|---|------|---|
| H6PD        | 0,129121093 | 0,199970457  | 0 | N.A. | 0 |
| TRPM3       | 0,129120067 |              | 0 | N.A. | 0 |
| MYO1A       | 0,129091076 | 0,228632966  | 0 | N.A. | 0 |
| OS9         | 0,129078721 | 0,336050324  | 0 | N.A. | 0 |
| RP4-564F22. | 0,128962076 | 0,203687781  | 0 | N.A. | 0 |
| RP11-333I13 | 0,128929747 | 0,015711623  | 0 | N.A. | 0 |
| RP11-493L12 | 0,128913573 | 0,27481474   | 0 | N.A. | 0 |
| SLC22A1     | 0,128852239 | 0,018269011  | 0 | N.A. | 0 |
| ESRRA       | 0,128764596 | 0,174099098  | 0 | N.A. | 0 |
| CXCL11      | 0,128733115 | 0,105575762  | 0 | N.A. | 0 |
| RGPD5       | 0,128717151 | 0,164469421  | 0 | N.A. | 0 |
| RP11-179A10 | 0,128663982 |              | 0 | N.A. | 0 |
| TMEM39A     | 0,128479317 | 0,409354477  | 0 | N.A. | 0 |
| UAP1        | 0,128471625 | 0,207192329  | 0 | N.A. | 0 |
| ATP6V1C2    | 0,128438268 | -0,291670781 | 0 | N.A. | 0 |
| RP1L1       | 0,128387187 | 0,371035043  | 0 | N.A. | 0 |
| SH3GLB2     | 0,128382624 | 0,372020031  | 0 | N.A. | 0 |
| RP11-16E12. | 0,128380365 | -0,210654666 | 0 | N.A. | 0 |
| SNAPC3      | 0,128376998 | 0,210484873  | 0 | N.A. | 0 |
| AC007292.6  | 0,128352927 | -0,131135897 | 0 | N.A. | 0 |
| KIAA2018    | 0,128345575 | 0,106613191  | 0 | N.A. | 0 |
| XXbac-B4760 | 0,12831851  | 0,204092222  | 0 | N.A. | 0 |
| C9orf85     | 0,128279822 | 0,165924165  | 0 | N.A. | 0 |
| MCAM        | 0,128269103 | -0,228360122 | 0 | N.A. | 0 |
| RP11-317P15 | 0,128246285 |              | 0 | N.A. | 0 |
| RP11-178C3. | 0,128219019 | -0,198605563 | 0 | N.A. | 0 |
| TNFRSF9     | 0,128185786 | -0,180114793 | 0 | N.A. | 0 |
| RP11-818F20 | 0,128152008 | 0,40326971   | 0 | N.A. | 0 |
| LINC00950   | 0,12812245  | -0,22174149  | 0 | N.A. | 0 |
| CADM2       | 0,128120764 | 0,114140366  | 0 | N.A. | 0 |
| TBC1D8B     | 0,127987795 | 0,373109685  | 0 | N.A. | 0 |
| CACNA1F     | 0,127931462 | 0,163275461  | 0 | N.A. | 0 |
| INPP5F      | 0,127913269 | 0,303546418  | 0 | N.A. | 0 |



|             |             |              |   |      |   |
|-------------|-------------|--------------|---|------|---|
| NLGN2       | 0,127886983 | -0,116162606 | 0 | N.A. | 0 |
| HS6ST1      | 0,127885516 | 0,276682785  | 0 | N.A. | 0 |
| SLC9A6      | 0,127844074 | 0,116772921  | 0 | N.A. | 0 |
| RP11-319G6  | 0,127832242 | -0,095873982 | 0 | N.A. | 0 |
| UBC         | 0,127827233 | 0,345844864  | 0 | N.A. | 0 |
| SNAPC2      | 0,127757849 | 0,200855856  | 0 | N.A. | 0 |
| HYAL3       | 0,127663137 | -0,345830041 | 0 | N.A. | 0 |
| KIAA0895L   | 0,127654678 | 0,116113454  | 0 | N.A. | 0 |
| RP1-63M2.7  | 0,127594504 | -0,05864025  | 0 | N.A. | 0 |
| ADRA1D      | 0,127435696 |              | 0 | N.A. | 0 |
| FBXL16      | 0,127433414 | -0,055810927 | 0 | N.A. | 0 |
| TMEM55B     | 0,127426976 | 0,342546282  | 0 | N.A. | 0 |
| KLHL28      | 0,127420126 | 0,345413964  | 0 | N.A. | 0 |
| RPA4        | 0,12740835  | 0,126868993  | 0 | N.A. | 0 |
| SAP25       | 0,127359523 | 0,278564286  | 0 | N.A. | 0 |
| GOLGA6L4    | 0,12733874  | 0,411543701  | 0 | N.A. | 0 |
| SIK3        | 0,127326878 | 0,146595722  | 0 | N.A. | 0 |
| CHKA        | 0,127308024 | 0,407954302  | 0 | N.A. | 0 |
| TMEM86A     | 0,127188103 | 0,234345244  | 0 | N.A. | 0 |
| RAPSN       | 0,127163638 |              | 0 | N.A. | 0 |
| XXbac-BPG25 | 0,127094368 | 0,198906763  | 0 | N.A. | 0 |
| KRTAP3-1    | 0,127035743 | 0,027614159  | 0 | N.A. | 0 |
| RP13-463N16 | 0,127019806 | -0,095120142 | 0 | N.A. | 0 |
| SEPT9       | 0,126996067 | 0,035851683  | 0 | N.A. | 0 |
| EQTN        | 0,126985127 |              | 0 | N.A. | 0 |
| CRYBG3      | 0,126980952 | 0,229818626  | 0 | N.A. | 0 |
| TWF1        | 0,126960771 | 0,19486676   | 0 | N.A. | 0 |
| SLC28A2     | 0,126935559 | -0,18654286  | 0 | N.A. | 0 |
| LETM2       | 0,126863147 | -0,0305306   | 0 | N.A. | 0 |
| TANK        | 0,126819629 | 0,00713353   | 0 | N.A. | 0 |
| ETFDH       | 0,126819109 | 0,009146026  | 0 | N.A. | 0 |
| FAM50A      | 0,126811596 | 0,362167223  | 0 | N.A. | 0 |
| CDK14       | 0,126779173 | 0,079690545  | 0 | N.A. | 0 |

|              |             |              |   |      |   |
|--------------|-------------|--------------|---|------|---|
| RP11-747D18  | 0,12672928  | -0,134604386 | 0 | N.A. | 0 |
| RP11-428O18  | 0,126724246 | 0,332219001  | 0 | N.A. | 0 |
| RP11-37B2.1  | 0,126684165 | 0,029072251  | 0 | N.A. | 0 |
| IFI44        | 0,126656173 | 0,410765658  | 0 | N.A. | 0 |
| CPAMD8       | 0,126640904 | 0,020882469  | 0 | N.A. | 0 |
| RNF4         | 0,126632219 | 0,095523507  | 0 | N.A. | 0 |
| GLI1         | 0,126601807 | -0,318315859 | 0 | N.A. | 0 |
| BICD2        | 0,126581962 | 0,021494714  | 0 | N.A. | 0 |
| CRTC2        | 0,126530999 | 0,148624291  | 0 | N.A. | 0 |
| BMP8B        | 0,126524152 | -0,076440101 | 0 | N.A. | 0 |
| RNF123       | 0,126522929 | -0,049989752 | 0 | N.A. | 0 |
| RAB14        | 0,126503357 | 0,332229698  | 0 | N.A. | 0 |
| KMT2A        | 0,126480471 | 0,343311743  | 0 | N.A. | 0 |
| CH507-513H   | 0,126442219 | -0,258288382 | 0 | N.A. | 0 |
| ESR2         | 0,12642656  |              | 0 | N.A. | 0 |
| NID2         | 0,126425499 | -0,083674087 | 0 | N.A. | 0 |
| RP11-182J1.3 | 0,126377185 |              | 0 | N.A. | 0 |
| MCTP2        | 0,126311612 | 0,227067126  | 0 | N.A. | 0 |
| HLA-DOB      | 0,126286906 | -0,08803447  | 0 | N.A. | 0 |
| RP11-800A3.  | 0,12628083  | 0,148108862  | 0 | N.A. | 0 |
| BTRC         | 0,126252153 | 0,228856362  | 0 | N.A. | 0 |
| ATAD1        | 0,126241706 | 0,050692823  | 0 | N.A. | 0 |
| POLM         | 0,126224219 | 0,405165533  | 0 | N.A. | 0 |
| DOCK7        | 0,126205366 | 0,344286375  | 0 | N.A. | 0 |
| ABALON       | 0,126198805 | 0,098393017  | 0 | N.A. | 0 |
| ASB6         | 0,126150648 | 0,209078114  | 0 | N.A. | 0 |
| RP4-737E23.  | 0,126129809 | 0,103561373  | 0 | N.A. | 0 |
| ZNF567       | 0,126082413 | 0,086103834  | 0 | N.A. | 0 |
| AC226118.1   | 0,126055679 | 0,205745471  | 0 | N.A. | 0 |
| RP11-383H13  | 0,126018098 | 0,254870055  | 0 | N.A. | 0 |
| RAB2B        | 0,12601247  | -0,083081607 | 0 | N.A. | 0 |
| ZNF117       | 0,125990756 | 0,113552471  | 0 | N.A. | 0 |
| RP11-196G18  | 0,125966446 | -0,200379221 | 0 | N.A. | 0 |

|             |             |              |   |      |   |
|-------------|-------------|--------------|---|------|---|
| FNBP1       | 0,125949742 | 0,119368822  | 0 | N.A. | 0 |
| C1S         | 0,125941357 | -0,14182943  | 0 | N.A. | 0 |
| RP11-539L10 | 0,125939054 | 0,023600781  | 0 | N.A. | 0 |
| RP11-223C24 | 0,125734239 | 0,313554315  | 0 | N.A. | 0 |
| GPRASP1     | 0,125722575 | -0,037611393 | 0 | N.A. | 0 |
| HDAC11      | 0,12565201  | 0,069225332  | 0 | N.A. | 0 |
| ZNF528      | 0,125613473 | 0,186320124  | 0 | N.A. | 0 |
| RP11-1060J1 | 0,125574188 | -0,111036271 | 0 | N.A. | 0 |
| PPP1R1C     | 0,125570827 | 0,161399394  | 0 | N.A. | 0 |
| SETD5       | 0,125549067 | 0,319608582  | 0 | N.A. | 0 |
| FAM219B     | 0,12554279  | 0,191929239  | 0 | N.A. | 0 |
| RP11-583F2. | 0,125528464 |              | 0 | N.A. | 0 |
| AGO2        | 0,125527673 | 0,338518328  | 0 | N.A. | 0 |
| FER         | 0,125486597 | 0,267120377  | 0 | N.A. | 0 |
| SLC31A2     | 0,12546297  | 0,098613251  | 0 | N.A. | 0 |
| LPCAT2      | 0,125459967 | 0,539025253  | 0 | N.A. | 0 |
| FAM153B     | 0,125444746 |              | 0 | N.A. | 0 |
| ZBTB41      | 0,125392569 | 0,031313784  | 0 | N.A. | 0 |
| IKZF1       | 0,125281852 | -0,185457386 | 0 | N.A. | 0 |
| CERS2       | 0,125278119 | 0,430835627  | 0 | N.A. | 0 |
| CMTR2       | 0,125267509 | 0,282364371  | 0 | N.A. | 0 |
| SCARNA2     | 0,125253253 | 0,02487679   | 0 | N.A. | 0 |
| RP11-250B2. | 0,125185693 | -0,032800313 | 0 | N.A. | 0 |
| CASD1       | 0,125137731 | 0,029377787  | 0 | N.A. | 0 |
| DNAH12      | 0,125118253 | -0,060333307 | 0 | N.A. | 0 |
| CNN1        | 0,125105706 | -0,046738521 | 0 | N.A. | 0 |
| CCDC97      | 0,125069055 | 0,223683191  | 0 | N.A. | 0 |
| IVNS1ABP    | 0,125032282 | 0,15172559   | 0 | N.A. | 0 |
| ERF         | 0,124968908 | 0,193298848  | 0 | N.A. | 0 |
| RP11-121E16 | 0,124967035 |              | 0 | N.A. | 0 |
| RAB17       | 0,124965854 | 0,13414002   | 0 | N.A. | 0 |
| REV1        | 0,124849329 | 0,111071857  | 0 | N.A. | 0 |
| IGSF6       | 0,124835063 | -0,29665516  | 0 | N.A. | 0 |

|             |             |              |   |      |   |
|-------------|-------------|--------------|---|------|---|
| AC017002.1  | 0,124825972 | 0,23596513   | 0 | N.A. | 0 |
| RP11-150C16 | 0,124817061 | 0,00717044   | 0 | N.A. | 0 |
| TRIM45      | 0,124794387 | -0,005666508 | 0 | N.A. | 0 |
| LINC01138   | 0,124708992 | -0,068095942 | 0 | N.A. | 0 |
| VPS13C      | 0,124610032 | 0,236373036  | 0 | N.A. | 0 |
| RP11-215P8. | 0,124566308 | -0,014595747 | 0 | N.A. | 0 |
| SLC26A1     | 0,124564676 | -0,00392063  | 0 | N.A. | 0 |
| RP11-429J17 | 0,124563572 |              | 0 | N.A. | 0 |
| SUPT5H      | 0,124549229 | 0,312891906  | 0 | N.A. | 0 |
| GDPD2       | 0,124523978 | -0,183210922 | 0 | N.A. | 0 |
| RASAL2      | 0,124521673 | 0,258544317  | 0 | N.A. | 0 |
| RGP1        | 0,124500442 | 0,027271399  | 0 | N.A. | 0 |
| TNFRSF18    | 0,124466299 | -0,150188175 | 0 | N.A. | 0 |
| LINC00672   | 0,124384509 | 0,258606541  | 0 | N.A. | 0 |
| NPAS3       | 0,124362184 |              | 0 | N.A. | 0 |
| HOTAIRM1    | 0,124356851 | 0,267212178  | 0 | N.A. | 0 |
| SPRY4       | 0,124326523 | 0,289258433  | 0 | N.A. | 0 |
| PRR34-AS1   | 0,124254394 | 0,080529904  | 0 | N.A. | 0 |
| RP5-892K4.1 | 0,12418817  | 0,085826916  | 0 | N.A. | 0 |
| CTNS        | 0,124113687 | 0,527603568  | 0 | N.A. | 0 |
| AKAP17A     | 0,124100107 | 0,365541402  | 0 | N.A. | 0 |
| GAS2L1      | 0,124089577 | 0,124985218  | 0 | N.A. | 0 |
| CTD-2619J13 | 0,12400874  | -0,099201949 | 0 | N.A. | 0 |
| RNF14       | 0,124003171 | 0,022731461  | 0 | N.A. | 0 |
| JARID2      | 0,124000925 | 0,078958828  | 0 | N.A. | 0 |
| KRTAP2-3    | 0,123969623 | 0,004569852  | 0 | N.A. | 0 |
| MKL2        | 0,123934142 | 0,246519611  | 0 | N.A. | 0 |
| CD40        | 0,123899741 | -0,193281346 | 0 | N.A. | 0 |
| NPY1R       | 0,123893178 | 0,040729624  | 0 | N.A. | 0 |
| HPGDS       | 0,123811294 | -0,27099092  | 0 | N.A. | 0 |
| BPIFA2      | 0,123782662 | -0,176808884 | 0 | N.A. | 0 |
| RP5-1021I20 | 0,123761167 | 0,236786835  | 0 | N.A. | 0 |
| RPH3AL      | 0,123695585 | 0,215600203  | 0 | N.A. | 0 |

|              |             |              |   |      |   |
|--------------|-------------|--------------|---|------|---|
| KCNJ5        | 0,12367451  |              | 0 | N.A. | 0 |
| SYTL5        | 0,123673871 | 0,233553324  | 0 | N.A. | 0 |
| PON2         | 0,123628044 | 0,609999907  | 0 | N.A. | 0 |
| RP11-486I11  | 0,123617044 | -0,348934795 | 0 | N.A. | 0 |
| SELPLG       | 0,123612298 | -0,030651847 | 0 | N.A. | 0 |
| TLR6         | 0,12356753  | -0,041584073 | 0 | N.A. | 0 |
| CD2BP2       | 0,123557626 | 0,2302655    | 0 | N.A. | 0 |
| SH3BP5L      | 0,123549827 | 0,048701688  | 0 | N.A. | 0 |
| FXD7         | 0,12353262  | -0,078978172 | 0 | N.A. | 0 |
| RP3-323A16.  | 0,123525103 | -0,234401285 | 0 | N.A. | 0 |
| GNAS         | 0,123453691 | 0,062398735  | 0 | N.A. | 0 |
| PLEKHA5      | 0,123449815 | 0,270206676  | 0 | N.A. | 0 |
| RP11-3P17.5  | 0,123433758 |              | 0 | N.A. | 0 |
| RNF6         | 0,123415807 | 0,200105331  | 0 | N.A. | 0 |
| C1orf159     | 0,123391601 | 0,11017817   | 0 | N.A. | 0 |
| SFTPA2       | 0,123346944 | 0,271077316  | 0 | N.A. | 0 |
| KIAA0368     | 0,123228929 | 0,137116838  | 0 | N.A. | 0 |
| ADCY9        | 0,123213755 | 0,282831807  | 0 | N.A. | 0 |
| SEMA4F       | 0,12314441  | 0,174802948  | 0 | N.A. | 0 |
| GVQW1        | 0,123139999 | 0,254293093  | 0 | N.A. | 0 |
| CTA-217C2.2  | 0,123089664 |              | 0 | N.A. | 0 |
| CTC-308K20.  | 0,123063369 | 0,173551623  | 0 | N.A. | 0 |
| RP3-449M8.9  | 0,123022511 |              | 0 | N.A. | 0 |
| CNST         | 0,123018234 | 0,346588257  | 0 | N.A. | 0 |
| FAM193B      | 0,123000021 | 0,240168771  | 0 | N.A. | 0 |
| PSMD6-AS2    | 0,122994811 | 0,304397429  | 0 | N.A. | 0 |
| SHC4         | 0,122981706 | 0,131683491  | 0 | N.A. | 0 |
| ZNF322       | 0,122962746 | -0,141369122 | 0 | N.A. | 0 |
| ADAP1        | 0,12293595  | 0,477928242  | 0 | N.A. | 0 |
| ATP13A4      | 0,122856646 | 0,011117001  | 0 | N.A. | 0 |
| RP11-432I5.4 | 0,122793454 | 0,030721969  | 0 | N.A. | 0 |
| RP11-161M6   | 0,122685163 | -0,074673285 | 0 | N.A. | 0 |
| SRCAP        | 0,122683482 | 0,178090183  | 0 | N.A. | 0 |

|             |             |              |   |      |   |
|-------------|-------------|--------------|---|------|---|
| OTUB2       | 0,122651335 | 0,287347235  | 0 | N.A. | 0 |
| RP11-26J3.1 | 0,122628603 | -0,114586195 | 0 | N.A. | 0 |
| CTD-2008A1. | 0,122623171 | 0,06197619   | 0 | N.A. | 0 |
| RP11-218M2  | 0,122622976 | 0,136396663  | 0 | N.A. | 0 |
| TTC30B      | 0,122574903 | 0,045646225  | 0 | N.A. | 0 |
| SPOCK1      | 0,122570815 | -0,167246137 | 0 | N.A. | 0 |
| EML6        | 0,122493107 | 0,012732346  | 0 | N.A. | 0 |
| GSK3B       | 0,122447357 | 0,23225856   | 0 | N.A. | 0 |
| RP11-475E11 | 0,122405472 | -0,010894152 | 0 | N.A. | 0 |
| LINC00106   | 0,122232096 | -0,09270259  | 0 | N.A. | 0 |
| LEAP2       | 0,122182589 | 0,240618985  | 0 | N.A. | 0 |
| FCER1G      | 0,122160908 | -0,326872332 | 0 | N.A. | 0 |
| CASC16      | 0,122148536 | 0,178847784  | 0 | N.A. | 0 |
| DNAJB12     | 0,122126523 | 0,23880005   | 0 | N.A. | 0 |
| MTMR9       | 0,122069436 | 0,192268023  | 0 | N.A. | 0 |
| SUFU        | 0,122067787 | 0,065490959  | 0 | N.A. | 0 |
| LNPEP       | 0,122064036 | 0,432974664  | 0 | N.A. | 0 |
| SPRED1      | 0,122038665 | 0,313339972  | 0 | N.A. | 0 |
| CBX7        | 0,121938553 | -0,149422986 | 0 | N.A. | 0 |
| LZTR1       | 0,121936163 | -0,041898018 | 0 | N.A. | 0 |
| AC010761.10 | 0,121893139 | -0,014868036 | 0 | N.A. | 0 |
| DMTN        | 0,121887034 | 0,375008395  | 0 | N.A. | 0 |
| RP11-295P9. | 0,121858487 | 0,377366587  | 0 | N.A. | 0 |
| NPHP3-ACAD  | 0,121854816 | -0,061905805 | 0 | N.A. | 0 |
| RP5-965G21. | 0,121818954 | 0,035059985  | 0 | N.A. | 0 |
| NOTCH2NL    | 0,121814538 | 0,221978511  | 0 | N.A. | 0 |
| TMEM88      | 0,121798199 | 0,219819342  | 0 | N.A. | 0 |
| NKX6-1      | 0,121775818 |              | 0 | N.A. | 0 |
| TTC7B       | 0,121766908 | -0,119924503 | 0 | N.A. | 0 |
| AC074011.2  | 0,121761971 |              | 0 | N.A. | 0 |
| CTD-2521M2  | 0,12170165  |              | 0 | N.A. | 0 |
| FARP2       | 0,121678549 | 0,362915295  | 0 | N.A. | 0 |
| PLA2G2D     | 0,121616758 |              | 0 | N.A. | 0 |

|              |             |              |   |      |   |
|--------------|-------------|--------------|---|------|---|
| THEMIS       | 0,121595221 | 0,223357989  | 0 | N.A. | 0 |
| SLC9A3R2     | 0,121581374 | 0,12181321   | 0 | N.A. | 0 |
| AC002467.7   | 0,121573811 | 0,318781023  | 0 | N.A. | 0 |
| GRAMD1A      | 0,121507816 | 0,187826466  | 0 | N.A. | 0 |
| AC019181.2   | 0,121507166 |              | 0 | N.A. | 0 |
| RP11-305L7.3 | 0,121483171 |              | 0 | N.A. | 0 |
| GGN          | 0,1213949   |              | 0 | N.A. | 0 |
| EPC2         | 0,121369116 | 0,185676597  | 0 | N.A. | 0 |
| DOCK9-AS2    | 0,121256093 | 0,136937798  | 0 | N.A. | 0 |
| RP13-580F15  | 0,121224527 | 0,121969524  | 0 | N.A. | 0 |
| TNK2-AS1     | 0,121193838 |              | 0 | N.A. | 0 |
| THNSL2       | 0,121172314 | -0,140780453 | 0 | N.A. | 0 |
| SFI1         | 0,121162977 | 0,268554668  | 0 | N.A. | 0 |
| RP11-514O1.1 | 0,12106089  | -0,194564342 | 0 | N.A. | 0 |
| TMEM38A      | 0,121043568 | 0,038191594  | 0 | N.A. | 0 |
| MFSD2A       | 0,121035996 | 0,335311878  | 0 | N.A. | 0 |
| RP11-10C24.1 | 0,121008379 | 0,115637039  | 0 | N.A. | 0 |
| RP11-539L10  | 0,120995787 | -0,233476375 | 0 | N.A. | 0 |
| SLC25A36     | 0,120991745 | 0,225757311  | 0 | N.A. | 0 |
| FLJ31356     | 0,120988474 | 0,413818962  | 0 | N.A. | 0 |
| RP11-284N8.1 | 0,120987399 |              | 0 | N.A. | 0 |
| RP11-439E19  | 0,120970863 | -0,005131848 | 0 | N.A. | 0 |
| SORBS1       | 0,120956182 | -0,117913681 | 0 | N.A. | 0 |
| KCNG1        | 0,120949717 | 0,107473348  | 0 | N.A. | 0 |
| GRB7         | 0,12088525  | 0,358611818  | 0 | N.A. | 0 |
| P2RX5-TAX1F  | 0,120845221 | -0,116358748 | 0 | N.A. | 0 |
| AC009404.2   | 0,120810154 | 0,221683516  | 0 | N.A. | 0 |
| ARSI         | 0,120801085 | 0,097602164  | 0 | N.A. | 0 |
| RP11-400N1.3 | 0,120766162 | -0,092392208 | 0 | N.A. | 0 |
| ZCCHC2       | 0,120759495 | 0,20633889   | 0 | N.A. | 0 |
| GNMT         | 0,120636661 |              | 0 | N.A. | 0 |
| REN          | 0,120617288 | 0,18669205   | 0 | N.A. | 0 |
| PACS2        | 0,120563326 | 0,335124729  | 0 | N.A. | 0 |

|              |             |              |   |      |   |
|--------------|-------------|--------------|---|------|---|
| TSPYL2       | 0,120530323 | -0,040603056 | 0 | N.A. | 0 |
| GNRH1        | 0,120453441 | 0,305488801  | 0 | N.A. | 0 |
| CCL13        | 0,120451802 | -0,091786456 | 0 | N.A. | 0 |
| FAM63A       | 0,120388293 | -0,140649558 | 0 | N.A. | 0 |
| DNAJB6       | 0,120381556 | -0,034853414 | 0 | N.A. | 0 |
| AKAP10       | 0,120367693 | 0,082631046  | 0 | N.A. | 0 |
| XXyac-YX65C  | 0,120335854 |              | 0 | N.A. | 0 |
| TTBK2        | 0,120328374 | 0,325954105  | 0 | N.A. | 0 |
| KIAA1107     | 0,120235794 | 0,081310606  | 0 | N.A. | 0 |
| MLLT4-AS1    | 0,120201638 | 0,431987518  | 0 | N.A. | 0 |
| UPK3A        | 0,120173339 | -0,034075864 | 0 | N.A. | 0 |
| NEK5         | 0,120137214 | -0,005790257 | 0 | N.A. | 0 |
| PCAT19       | 0,120119518 | -0,285457525 | 0 | N.A. | 0 |
| HOMER3       | 0,120027917 | 0,216355684  | 0 | N.A. | 0 |
| CAB39L       | 0,120012203 | 0,170061081  | 0 | N.A. | 0 |
| SNN          | 0,120002158 | 0,194095222  | 0 | N.A. | 0 |
| IL12RB1      | 0,119849837 | 0,357582912  | 0 | N.A. | 0 |
| PIGG         | 0,119848768 | 0,343092941  | 0 | N.A. | 0 |
| VOPP1        | 0,119828272 | 0,181799781  | 0 | N.A. | 0 |
| DRAM1        | 0,119826018 | -0,03295236  | 0 | N.A. | 0 |
| ARHGEF18     | 0,119668798 | 0,287501056  | 0 | N.A. | 0 |
| AC136616.1   | 0,119655101 | 0,344893269  | 0 | N.A. | 0 |
| TCF20        | 0,119590058 | 0,131950562  | 0 | N.A. | 0 |
| CRACR2B      | 0,119569232 | 0,306259717  | 0 | N.A. | 0 |
| ANKRD33      | 0,119492576 |              | 0 | N.A. | 0 |
| SEMA6A-AS1   | 0,119458864 | -0,036750101 | 0 | N.A. | 0 |
| KANSL3       | 0,119441724 | 0,121141679  | 0 | N.A. | 0 |
| RP11-227H15  | 0,119343334 | -0,168975944 | 0 | N.A. | 0 |
| KIAA0895     | 0,119329277 | 0,1926492    | 0 | N.A. | 0 |
| RP11-675F6.4 | 0,119299776 | -0,024402574 | 0 | N.A. | 0 |
| AC005487.2   | 0,119295979 | 0,030721969  | 0 | N.A. | 0 |
| PGAP3        | 0,119294169 | 0,198879456  | 0 | N.A. | 0 |
| HAVCR1       | 0,119293848 | -0,13486379  | 0 | N.A. | 0 |



|              |             |              |   |      |   |
|--------------|-------------|--------------|---|------|---|
| RP11-297M9   | 0,119287701 | -0,191725167 | 0 | N.A. | 0 |
| ALOXE3       | 0,119208865 | 0,14723223   | 0 | N.A. | 0 |
| ADCY7        | 0,119177752 | 0,257732609  | 0 | N.A. | 0 |
| TTC14        | 0,119173503 | 0,19189215   | 0 | N.A. | 0 |
| TLN2         | 0,119066641 | 0,189112786  | 0 | N.A. | 0 |
| DNHD1        | 0,119044094 | 0,208824859  | 0 | N.A. | 0 |
| MAPK11       | 0,118999084 | -0,075592913 | 0 | N.A. | 0 |
| NRSN2-AS1    | 0,118952411 | -0,23257679  | 0 | N.A. | 0 |
| DIP2A        | 0,118945259 | 0,142802009  | 0 | N.A. | 0 |
| UBE2A        | 0,118942617 | -0,042438243 | 0 | N.A. | 0 |
| CXorf65      | 0,118895228 | 0,0167993    | 0 | N.A. | 0 |
| NXF3         | 0,118868547 | 0,124749117  | 1 | cls3 | 0 |
| UEVLD        | 0,118855875 | -0,121041185 | 0 | N.A. | 0 |
| RP1-150O5.3  | 0,118847543 |              | 0 | N.A. | 0 |
| BTD          | 0,118803488 | 0,1167486    | 0 | N.A. | 0 |
| STRC         | 0,11877968  | 0,105803584  | 0 | N.A. | 0 |
| RP11-449D8.  | 0,118767459 | 0,117091098  | 0 | N.A. | 0 |
| PRR5-ARHGA   | 0,118645315 | -0,00218291  | 0 | N.A. | 0 |
| RBMS3        | 0,118634618 | -0,116643251 | 0 | N.A. | 0 |
| SQRDL        | 0,118604755 | 0,367963659  | 0 | N.A. | 0 |
| WFDC5        | 0,118471159 | 0,251500084  | 0 | N.A. | 0 |
| ILDR2        | 0,118435359 | -0,052286491 | 0 | N.A. | 0 |
| WFDC1        | 0,118417401 | 0,129229784  | 0 | N.A. | 0 |
| DTX1         | 0,118338736 | 0,311516488  | 0 | N.A. | 0 |
| BEX2         | 0,11830913  | 0,070435319  | 0 | N.A. | 0 |
| HMGCR        | 0,118304124 | 0,242216323  | 0 | N.A. | 0 |
| IPMK         | 0,118236618 | -0,03220388  | 0 | N.A. | 0 |
| USP34        | 0,118236133 | 0,438442831  | 0 | N.A. | 0 |
| AP2A2        | 0,118217619 | 0,099969369  | 0 | N.A. | 0 |
| TEX14        | 0,118200562 |              | 0 | N.A. | 0 |
| SLA2         | 0,118113997 | -0,036058694 | 0 | N.A. | 0 |
| PARP3        | 0,118113446 | 0,136271439  | 0 | N.A. | 0 |
| RP11-20I23.6 | 0,118104952 | 0,391820096  | 0 | N.A. | 0 |

|              |             |              |   |      |   |
|--------------|-------------|--------------|---|------|---|
| LINC00239    | 0,118065567 | -0,152032562 | 0 | N.A. | 0 |
| TUG1         | 0,11806177  | 0,123226345  | 0 | N.A. | 0 |
| PCDHGA1      | 0,118056044 | -0,070879352 | 0 | N.A. | 0 |
| ZDHHC11      | 0,118017357 | 0,060494878  | 0 | N.A. | 0 |
| FXR2         | 0,117958612 | 0,472572466  | 0 | N.A. | 0 |
| CD1C         | 0,117883567 | -0,183155979 | 0 | N.A. | 0 |
| SPESP1       | 0,117791169 | 0,100954369  | 0 | N.A. | 0 |
| RP11-563J2.2 | 0,11776719  | 0,061010379  | 0 | N.A. | 0 |
| GRK5         | 0,11774256  | -0,178409719 | 0 | N.A. | 0 |
| TCEB2        | 0,117684599 | 0,039783897  | 0 | N.A. | 0 |
| ALG10B       | 0,117660491 | -0,113922993 | 0 | N.A. | 0 |
| SKAP2        | 0,117659857 | 0,340768189  | 0 | N.A. | 0 |
| ARHGAP31     | 0,11764646  | -0,211970812 | 0 | N.A. | 0 |
| IGSF8        | 0,117628464 | 0,554460205  | 0 | N.A. | 0 |
| N4BP3        | 0,117608162 | -0,099515066 | 0 | N.A. | 0 |
| KIAA0556     | 0,117603328 | 0,338071508  | 0 | N.A. | 0 |
| TNFSF14      | 0,117539655 |              | 0 | N.A. | 0 |
| RP3-395M20   | 0,117480885 | 0,107204846  | 0 | N.A. | 0 |
| AC140912.1   | 0,117440442 | -0,065237288 | 0 | N.A. | 0 |
| RP5-1085F17  | 0,117432588 | 0,174615781  | 0 | N.A. | 0 |
| AHRR         | 0,117422145 | 0,158473083  | 0 | N.A. | 0 |
| CARD14       | 0,117388393 | 0,323569094  | 0 | N.A. | 0 |
| ESCO1        | 0,117358823 | 0,103463546  | 0 | N.A. | 0 |
| THBS2        | 0,117352915 | 0,065503794  | 0 | N.A. | 0 |
| RP11-528I4.2 | 0,117327854 | 0,044466191  | 0 | N.A. | 0 |
| LIN37        | 0,117317937 | 0,095607139  | 0 | N.A. | 0 |
| ITGA6        | 0,117293771 | 0,463024178  | 0 | N.A. | 0 |
| AC009133.15  | 0,117255877 |              | 0 | N.A. | 0 |
| TAPT1-AS1    | 0,11724933  | -0,047306366 | 0 | N.A. | 0 |
| B3GALT1      | 0,117217449 |              | 0 | N.A. | 0 |
| EFCAB13      | 0,117195476 | 0,188664498  | 0 | N.A. | 0 |
| RP3-510D11.  | 0,117165894 | -0,035664096 | 0 | N.A. | 0 |
| AQP8         | 0,117123245 | 0,201329568  | 0 | N.A. | 0 |

|              |             |              |   |      |   |
|--------------|-------------|--------------|---|------|---|
| RP11-12J10.3 | 0,117115588 |              | 0 | N.A. | 0 |
| RP11-88E10.  | 0,117099926 | 0,241207263  | 0 | N.A. | 0 |
| SNRK-AS1     | 0,117090659 |              | 0 | N.A. | 0 |
| UNC5A        | 0,117003391 | 0,112651955  | 0 | N.A. | 0 |
| GTF2I        | 0,116993404 | 0,369021915  | 0 | N.A. | 0 |
| SNHG23       | 0,116906958 | 0,112242532  | 0 | N.A. | 0 |
| RP11-54O7.1  | 0,116899094 | 0,155998182  | 0 | N.A. | 0 |
| PCNX         | 0,116809242 | 0,380972065  | 0 | N.A. | 0 |
| AC078883.3   | 0,116789731 | 0,126465108  | 0 | N.A. | 0 |
| RP1-244F24.  | 0,116765893 | -0,10657483  | 0 | N.A. | 0 |
| KDM4C        | 0,116740859 | 0,19240819   | 0 | N.A. | 0 |
| IL24         | 0,116668392 | 0,183862267  | 0 | N.A. | 0 |
| ZNF704       | 0,116610606 | 0,248613125  | 0 | N.A. | 0 |
| PLCB3        | 0,116606306 | 0,357643385  | 0 | N.A. | 0 |
| MPP3         | 0,116580701 | 0,297604504  | 0 | N.A. | 0 |
| TCAP         | 0,116563054 | -0,068196696 | 0 | N.A. | 0 |
| IL17RA       | 0,116534684 | 0,084469229  | 0 | N.A. | 0 |
| ASTE1        | 0,116531026 | 0,065833887  | 0 | N.A. | 0 |
| RP5-940J5.6  | 0,11651642  |              | 0 | N.A. | 0 |
| KCNN2        | 0,116512463 | 0,061556441  | 0 | N.A. | 0 |
| MSC          | 0,116497111 | -0,118072454 | 0 | N.A. | 0 |
| PERM1        | 0,116486357 |              | 0 | N.A. | 0 |
| ARMCX4       | 0,116364552 | 0,171113636  | 0 | N.A. | 0 |
| PIK3CA       | 0,116358135 | 0,125139631  | 0 | N.A. | 0 |
| CD6          | 0,116194853 | -0,034369504 | 0 | N.A. | 0 |
| AC144835.1   | 0,116193973 | 0,198097503  | 0 | N.A. | 0 |
| KCTD13       | 0,116187513 | 0,100365952  | 0 | N.A. | 0 |
| STK38        | 0,116186367 | 0,202851883  | 0 | N.A. | 0 |
| PBX4         | 0,11612047  | 0,512978895  | 0 | N.A. | 0 |
| FBXO42       | 0,116109037 | 0,077664173  | 0 | N.A. | 0 |
| ANKFN1       | 0,1160316   | 0,056881664  | 0 | N.A. | 0 |
| UGP2         | 0,116026135 | 0,000250981  | 0 | N.A. | 0 |
| TRIM58       | 0,11602081  | -0,179790989 | 0 | N.A. | 0 |

|             |             |              |   |      |   |
|-------------|-------------|--------------|---|------|---|
| GOS2        | 0,116017407 | 0,25648654   | 0 | N.A. | 0 |
| SOCS1       | 0,116004194 | 0,155480992  | 0 | N.A. | 0 |
| IL5         | 0,11599005  | 0,34381894   | 0 | N.A. | 0 |
| DNAJB14     | 0,115956767 | 0,260818349  | 0 | N.A. | 0 |
| AC018816.3  | 0,11588417  | -0,045349846 | 0 | N.A. | 0 |
| DNASE1      | 0,115882022 | 0,476169488  | 0 | N.A. | 0 |
| KLK13       | 0,115874932 | 0,392458114  | 0 | N.A. | 0 |
| GDPGP1      | 0,115831563 | 0,068062441  | 0 | N.A. | 0 |
| TMEM248     | 0,115801392 | 0,322966466  | 0 | N.A. | 0 |
| TMEM95      | 0,115782509 |              | 0 | N.A. | 0 |
| INAFM2      | 0,115762388 | 0,054831312  | 0 | N.A. | 0 |
| CABLES1     | 0,115636957 | -0,021029353 | 0 | N.A. | 0 |
| RBM44       | 0,115572517 | 0,048814127  | 0 | N.A. | 0 |
| DAPK2       | 0,11556875  | -0,040719462 | 0 | N.A. | 0 |
| FAM149A     | 0,115556423 | -0,168033853 | 0 | N.A. | 0 |
| EPC1        | 0,115480752 | 0,105838651  | 0 | N.A. | 0 |
| RP11-159G9. | 0,115479672 | -0,146460509 | 0 | N.A. | 0 |
| SYNE2       | 0,115477236 | -0,065141107 | 0 | N.A. | 0 |
| NOVA1-AS1   | 0,115438073 | 0,010841376  | 0 | N.A. | 0 |
| RBM6        | 0,115419458 | 0,099992918  | 0 | N.A. | 0 |
| CFD         | 0,115379071 | 0,065026732  | 0 | N.A. | 0 |
| JMY         | 0,115340321 | 0,080775373  | 0 | N.A. | 0 |
| RALA        | 0,115331782 | 0,363961512  | 0 | N.A. | 0 |
| HOXA4       | 0,115330488 | -0,119800247 | 1 | cl1  | 0 |
| RP11-333E1. | 0,115329019 | 0,003332138  | 0 | N.A. | 0 |
| HPS5        | 0,115314973 | 0,102417793  | 0 | N.A. | 0 |
| ST3GAL6     | 0,11531274  | 0,271182801  | 0 | N.A. | 0 |
| RP1-111C20. | 0,11515751  | -0,052926382 | 0 | N.A. | 0 |
| ZFP57       | 0,115063117 |              | 0 | N.A. | 0 |
| GATM-AS1    | 0,115057354 | 0,11868087   | 0 | N.A. | 0 |
| PLS3        | 0,115048005 | 0,339545866  | 0 | N.A. | 0 |
| LINC00880   | 0,115034553 | 0,289314415  | 0 | N.A. | 0 |
| ABCC10      | 0,114986592 | 0,219458011  | 0 | N.A. | 0 |

|             |             |              |   |      |   |
|-------------|-------------|--------------|---|------|---|
| KRTAP5-9    | 0,114954444 | 0,228939174  | 0 | N.A. | 0 |
| ARTN        | 0,114941894 | -0,027717845 | 0 | N.A. | 0 |
| PARD3B      | 0,114934359 | 0,47044134   | 0 | N.A. | 0 |
| UBN2        | 0,114934199 | 0,254768964  | 0 | N.A. | 0 |
| ACKR3       | 0,114905291 | -0,053639716 | 0 | N.A. | 0 |
| LRFN3       | 0,114880763 | 0,003634928  | 0 | N.A. | 0 |
| OTUD3       | 0,114850581 | 0,278949941  | 0 | N.A. | 0 |
| MEIS1       | 0,114759016 | -0,245832023 | 0 | N.A. | 0 |
| TGFB2       | 0,114747963 | 0,113628497  | 0 | N.A. | 0 |
| COL5A2      | 0,114705646 | 0,029353316  | 0 | N.A. | 0 |
| YY1AP1      | 0,114624276 | 0,199626059  | 0 | N.A. | 0 |
| SNPH        | 0,114617995 | -0,057214835 | 0 | N.A. | 0 |
| RP11-11N5.1 | 0,114555247 | -0,22061673  | 0 | N.A. | 0 |
| LPAR2       | 0,114547403 | 0,293889222  | 0 | N.A. | 0 |
| FUCA1       | 0,114507968 | 0,271435773  | 0 | N.A. | 0 |
| C11orf24    | 0,114496055 | 0,035246157  | 0 | N.A. | 0 |
| CTC-1337H24 | 0,114469574 | 0,035312665  | 0 | N.A. | 0 |
| VNN3        | 0,114334463 |              | 0 | N.A. | 0 |
| XXbac-BPG27 | 0,114303239 | 0,007429475  | 0 | N.A. | 0 |
| SNX12       | 0,114220103 | 0,002404016  | 0 | N.A. | 0 |
| EVI5        | 0,114214218 | 0,238833072  | 0 | N.A. | 0 |
| CHM         | 0,114208665 | -0,1102855   | 0 | N.A. | 0 |
| SCN3B       | 0,114158533 | 0,283364816  | 0 | N.A. | 0 |
| ARHGEF16    | 0,113983801 | 0,645972584  | 0 | N.A. | 0 |
| FGF11       | 0,113964475 | -0,103147016 | 0 | N.A. | 0 |
| LINC00847   | 0,113944907 | -0,085286135 | 0 | N.A. | 0 |
| LINC00882   | 0,113875237 | -0,003015134 | 0 | N.A. | 0 |
| PTGIS       | 0,113867559 | -0,281175683 | 0 | N.A. | 0 |
| ZNF792      | 0,113865493 | -0,070065096 | 0 | N.A. | 0 |
| MKNK1       | 0,113826515 | 0,085597811  | 0 | N.A. | 0 |
| PDE4D       | 0,113825226 | 0,179003572  | 0 | N.A. | 0 |
| DMXL1       | 0,113782143 | 0,282263857  | 0 | N.A. | 0 |
| RP1-30M3.5  | 0,113717308 |              | 0 | N.A. | 0 |

|              |             |              |   |      |   |
|--------------|-------------|--------------|---|------|---|
| PTPRE        | 0,11363518  | 0,126652546  | 0 | N.A. | 0 |
| CTD-2020K17  | 0,113581896 | -0,119365796 | 0 | N.A. | 0 |
| HPCA         | 0,113566474 | -0,191386253 | 0 | N.A. | 0 |
| ANXA8        | 0,113553482 | 0,341638038  | 0 | N.A. | 0 |
| OLMALINC     | 0,113524023 | -0,022486773 | 0 | N.A. | 0 |
| LYRM9        | 0,113521742 | 0,014166108  | 0 | N.A. | 0 |
| TRERF1       | 0,113483124 | 0,236889081  | 0 | N.A. | 0 |
| NUMA1        | 0,113437067 | 0,171717852  | 0 | N.A. | 0 |
| AC006547.13  | 0,113412766 |              | 0 | N.A. | 0 |
| TPTE2        | 0,11331429  |              | 0 | N.A. | 0 |
| BTBD10       | 0,113311477 | 0,212605815  | 0 | N.A. | 0 |
| CBWD5        | 0,113301873 | 0,119626402  | 0 | N.A. | 0 |
| IGHV3-7      | 0,113229422 | -0,124752779 | 0 | N.A. | 0 |
| RP1-170O19.  | 0,113165232 | 0,029670443  | 0 | N.A. | 0 |
| CTD-2292M1   | 0,113114478 | -0,167094224 | 0 | N.A. | 0 |
| TNKS         | 0,113104044 | 0,243841406  | 0 | N.A. | 0 |
| CCDC151      | 0,113098935 |              | 0 | N.A. | 0 |
| HIST1H2BF    | 0,113020507 | -0,073541593 | 0 | N.A. | 0 |
| RAB12        | 0,113018005 | 0,118023691  | 0 | N.A. | 0 |
| EXPH5        | 0,11299877  | 0,114100685  | 0 | N.A. | 0 |
| SH3BP5       | 0,112929962 | -0,086594223 | 0 | N.A. | 0 |
| EFNA5        | 0,112914502 | 0,301113144  | 0 | N.A. | 0 |
| AC012358.8   | 0,112909775 | 0,101189261  | 0 | N.A. | 0 |
| CTB-131K11.  | 0,112907748 | -0,103519307 | 0 | N.A. | 0 |
| ZNF516       | 0,112884713 | 0,068547842  | 0 | N.A. | 0 |
| SAA4         | 0,112880985 | 0,464724926  | 0 | N.A. | 0 |
| SETD7        | 0,112856225 | 0,024250488  | 0 | N.A. | 0 |
| PRKAA2       | 0,112851326 | 0,071147269  | 0 | N.A. | 0 |
| RP11-803B1.  | 0,112789696 | 0,061866831  | 0 | N.A. | 0 |
| RP11-328J2.1 | 0,112784358 |              | 0 | N.A. | 0 |
| TTBK1        | 0,112783527 | 0,007741292  | 0 | N.A. | 0 |
| UGGT1        | 0,112758963 | 0,341767846  | 0 | N.A. | 0 |
| ATP6AP1      | 0,112745278 | 0,51329178   | 0 | N.A. | 0 |

|             |             |              |   |      |   |
|-------------|-------------|--------------|---|------|---|
| SIDT2       | 0,112685941 | 0,111872002  | 0 | N.A. | 0 |
| LINC01556   | 0,112624256 | 0,023252572  | 0 | N.A. | 0 |
| CRX         | 0,112619688 | 0,09175742   | 0 | N.A. | 0 |
| KCND1       | 0,112569391 | 0,363750776  | 0 | N.A. | 0 |
| RP11-666A20 | 0,112565394 | 0,074632187  | 0 | N.A. | 0 |
| IFI16       | 0,112522131 | -0,445403849 | 0 | N.A. | 0 |
| EGR3        | 0,112502592 | 0,336317759  | 0 | N.A. | 0 |
| WDR7        | 0,112367746 | 0,246564386  | 0 | N.A. | 0 |
| DIP2C       | 0,11232571  | 0,164209385  | 0 | N.A. | 0 |
| KRBA1       | 0,112320551 |              | 0 | N.A. | 0 |
| LINC00592   | 0,112312725 | 0,227679554  | 0 | N.A. | 0 |
| SVOPL       | 0,112299792 |              | 0 | N.A. | 0 |
| C1R         | 0,11225928  | -0,245126182 | 0 | N.A. | 0 |
| C7orf61     | 0,112231941 | -0,050108074 | 0 | N.A. | 0 |
| RP11-796E2. | 0,112183072 | -0,052185192 | 0 | N.A. | 0 |
| SRGAP2C     | 0,112152412 | 0,137880184  | 0 | N.A. | 0 |
| FBXL18      | 0,112127691 | 0,318794737  | 0 | N.A. | 0 |
| RP11-442N24 | 0,11209912  | -0,301447231 | 0 | N.A. | 0 |
| CTD-2358C21 | 0,112075123 |              | 0 | N.A. | 0 |
| TBC1D15     | 0,112014125 | 0,163186503  | 0 | N.A. | 0 |
| AC003991.3  | 0,112006686 | 0,147185583  | 0 | N.A. | 0 |
| CTF1        | 0,112003576 | -0,157065667 | 0 | N.A. | 0 |
| NPB         | 0,112000781 | -0,126787251 | 0 | N.A. | 0 |
| TRIM47      | 0,111880064 | 0,449409032  | 0 | N.A. | 0 |
| EMR2        | 0,111813169 | -0,029552153 | 0 | N.A. | 0 |
| ZNF746      | 0,111741276 | -0,049820455 | 0 | N.A. | 0 |
| CTC-321K16. | 0,111712409 |              | 0 | N.A. | 0 |
| VSTM2L      | 0,11170118  | 0,23637657   | 0 | N.A. | 0 |
| CXCL5       | 0,111677832 | 0,476558003  | 0 | N.A. | 0 |
| SNAI3       | 0,111639126 | 0,081003244  | 0 | N.A. | 0 |
| ARID3A      | 0,111570648 | 0,25049956   | 0 | N.A. | 0 |
| SLC24A1     | 0,111564678 | 0,07560717   | 0 | N.A. | 0 |
| MBTPS2      | 0,111490018 | -0,020707435 | 0 | N.A. | 0 |

|             |             |              |   |      |   |
|-------------|-------------|--------------|---|------|---|
| RP6-109B7.4 | 0,111488902 | 0,146631491  | 0 | N.A. | 0 |
| GOLGA6L9    | 0,111420326 | 0,002096501  | 0 | N.A. | 0 |
| FAXDC2      | 0,111372573 | 0,534498826  | 0 | N.A. | 0 |
| FOLR3       | 0,111304821 | 0,170692352  | 0 | N.A. | 0 |
| CTC-366B18. | 0,111290754 | 0,091580104  | 0 | N.A. | 0 |
| UAP1L1      | 0,111237081 | 0,019458526  | 0 | N.A. | 0 |
| AF127936.9  | 0,11120151  | 0,132390146  | 0 | N.A. | 0 |
| NFAM1       | 0,111198086 | 0,014887086  | 0 | N.A. | 0 |
| CMPK1       | 0,111170007 | 0,249218017  | 0 | N.A. | 0 |
| CAMSAP1     | 0,111157464 | 0,253005447  | 0 | N.A. | 0 |
| LY6G5B      | 0,111079478 | -0,037106033 | 0 | N.A. | 0 |
| ZNF324      | 0,111025459 | 0,093986453  | 0 | N.A. | 0 |
| STARD8      | 0,111010671 |              | 0 | N.A. | 0 |
| RP1-178F10. | 0,111009253 | 0,18479211   | 0 | N.A. | 0 |
| TPRA1       | 0,111003518 | 0,16445882   | 0 | N.A. | 0 |
| VRK3        | 0,110997996 | 0,024588384  | 0 | N.A. | 0 |
| RP5-999L4.2 | 0,110934955 |              | 0 | N.A. | 0 |
| LYRM5       | 0,110923168 | -0,225620492 | 0 | N.A. | 0 |
| ENTPD3-AS1  | 0,110917957 | -0,219545841 | 0 | N.A. | 0 |
| KANK2       | 0,110894402 | 0,224410998  | 0 | N.A. | 0 |
| RP11-344N10 | 0,1108702   | 0,178887874  | 0 | N.A. | 0 |
| RP11-138I18 | 0,110869403 | 0,176547169  | 0 | N.A. | 0 |
| ZNF514      | 0,11085511  | 0,242123661  | 0 | N.A. | 0 |
| RP11-498C9. | 0,110814868 | 0,240705755  | 0 | N.A. | 0 |
| KLC3        | 0,110808229 | 0,199779731  | 0 | N.A. | 0 |
| FZD1        | 0,110768076 | 0,203915975  | 0 | N.A. | 0 |
| C1RL-AS1    | 0,110743706 | 0,213774826  | 0 | N.A. | 0 |
| TTC30A      | 0,110740258 | 0,152326596  | 0 | N.A. | 0 |
| RHOT1       | 0,110731031 | 0,502411025  | 0 | N.A. | 0 |
| WISP2       | 0,110665137 | 0,28143157   | 0 | N.A. | 0 |
| YES1        | 0,110651273 | 0,335140435  | 0 | N.A. | 0 |
| C1QTNF1-AS  | 0,110591767 | 0,034048495  | 0 | N.A. | 0 |
| CATSPERB    | 0,110550509 | 0,267009826  | 0 | N.A. | 0 |



|             |             |              |   |      |   |
|-------------|-------------|--------------|---|------|---|
| MT-ND5      | 0,110546656 | 0,413780976  | 0 | N.A. | 0 |
| LINC01215   | 0,110522151 | -0,225987027 | 0 | N.A. | 0 |
| MICU1       | 0,110467897 | 0,023146956  | 0 | N.A. | 0 |
| PRPH        | 0,110456963 | -0,029024714 | 1 | cls3 | 0 |
| RP11-147L13 | 0,11042056  | -0,056743171 | 0 | N.A. | 0 |
| RP1-67K17.4 | 0,110317138 |              | 0 | N.A. | 0 |
| SNX24       | 0,110306916 | 0,111961084  | 1 | cl1  | 0 |
| FAM126A     | 0,110186895 | -0,099482543 | 0 | N.A. | 0 |
| LONP2       | 0,11015073  | 0,242369538  | 0 | N.A. | 0 |
| TTC39A      | 0,110148044 | 0,134000964  | 0 | N.A. | 0 |
| RP11-568A7. | 0,11014546  | 0,150709758  | 0 | N.A. | 0 |
| EPHA4       | 0,110134585 | 0,29214935   | 0 | N.A. | 0 |
| LBX2        | 0,110098069 | 0,299018863  | 0 | N.A. | 0 |
| RP11-982M1  | 0,110090428 |              | 0 | N.A. | 0 |
| RP11-186N1  | 0,110044734 | -0,049665458 | 0 | N.A. | 0 |
| ZNF784      | 0,11002972  | 0,164884005  | 0 | N.A. | 0 |
| HES7        | 0,110026207 | -0,190565893 | 0 | N.A. | 0 |
| IL17C       | 0,109902059 | 0,092848632  | 0 | N.A. | 0 |
| RP4-635E18. | 0,109873592 |              | 0 | N.A. | 0 |
| FAM122C     | 0,109819517 | -0,145420487 | 0 | N.A. | 0 |
| CH17-340M2  | 0,109781518 | 0,02421935   | 0 | N.A. | 0 |
| SEL1L3      | 0,109768938 | 0,376440943  | 0 | N.A. | 0 |
| NCK1-AS1    | 0,109734106 | -0,139227533 | 0 | N.A. | 0 |
| LARP6       | 0,109732859 | -0,149116019 | 0 | N.A. | 0 |
| LLNLR-284B4 | 0,109732397 | 0,12667672   | 0 | N.A. | 0 |
| TSC2        | 0,10973198  | 0,08467362   | 0 | N.A. | 0 |
| NLRP2       | 0,109611522 | 0,340441781  | 0 | N.A. | 0 |
| DSEL        | 0,109588424 | -0,051485765 | 0 | N.A. | 0 |
| UTS2        | 0,10956028  | 0,000462093  | 0 | N.A. | 0 |
| GJC2        | 0,109546926 | -0,063040393 | 0 | N.A. | 0 |
| PLD1        | 0,109500585 | 0,440396827  | 0 | N.A. | 0 |
| BTBD3       | 0,109466941 | 0,363047187  | 0 | N.A. | 0 |
| GRM3        | 0,109407347 |              | 0 | N.A. | 0 |

|             |             |              |   |      |   |
|-------------|-------------|--------------|---|------|---|
| APBB1       | 0,109393308 | 0,109909512  | 0 | N.A. | 0 |
| RP11-439M1  | 0,109390966 |              | 0 | N.A. | 0 |
| PRMT7       | 0,10938955  | 0,237990532  | 0 | N.A. | 0 |
| DENND2A     | 0,109388743 | -0,203777642 | 0 | N.A. | 0 |
| PRRG2       | 0,109318874 | 0,405764159  | 0 | N.A. | 0 |
| LINC00336   | 0,109310716 | 0,200499475  | 0 | N.A. | 0 |
| THBD        | 0,109279629 | -0,196812133 | 0 | N.A. | 0 |
| RP11-295G20 | 0,109268968 | -0,131316336 | 0 | N.A. | 0 |
| TGFBR3      | 0,109237459 | 0,577887011  | 0 | N.A. | 0 |
| RP11-334A14 | 0,109234241 | 0,107407448  | 0 | N.A. | 0 |
| RP11-440I14 | 0,109181215 | 0,160934873  | 0 | N.A. | 0 |
| ACAD10      | 0,109125441 | -0,003220862 | 0 | N.A. | 0 |
| ANKRA2      | 0,10909963  | 0,19153614   | 0 | N.A. | 0 |
| NIPAL1      | 0,10909227  | 0,037413207  | 0 | N.A. | 0 |
| HDAC6       | 0,109077013 | 0,17152821   | 0 | N.A. | 0 |
| SIL1        | 0,109072497 | 0,159971902  | 0 | N.A. | 0 |
| SOX9        | 0,109026561 | 0,35779602   | 0 | N.A. | 0 |
| KIAA1715    | 0,108998383 | 0,378163821  | 0 | N.A. | 0 |
| DNAJB4      | 0,108985017 | 0,073203978  | 0 | N.A. | 0 |
| KMT2B       | 0,108971381 | 0,349075164  | 0 | N.A. | 0 |
| TRAPPC8     | 0,108957657 | 0,272837283  | 0 | N.A. | 0 |
| PLSCR2      | 0,10893792  | 0,181206428  | 0 | N.A. | 0 |
| CATSPERG    | 0,108907576 | -0,144722632 | 0 | N.A. | 0 |
| SBF2-AS1    | 0,108903773 | 0,045140777  | 0 | N.A. | 0 |
| PER2        | 0,108888719 | 0,17943211   | 0 | N.A. | 0 |
| ZNF106      | 0,108875034 | 0,106019872  | 0 | N.A. | 0 |
| C17orf85    | 0,108854472 | 0,083048615  | 0 | N.A. | 0 |
| RP11-103H7  | 0,108806264 |              | 0 | N.A. | 0 |
| IRAK3       | 0,108800544 | -0,344056006 | 0 | N.A. | 0 |
| TAPT1       | 0,108796473 | 0,107469408  | 0 | N.A. | 0 |
| APLP1       | 0,108782628 | 0,322221656  | 0 | N.A. | 0 |
| RP11-1103G1 | 0,108771549 | -0,299480177 | 0 | N.A. | 0 |
| NOXRED1     | 0,108754143 | 0,264455404  | 0 | N.A. | 0 |

|             |             |              |   |      |   |
|-------------|-------------|--------------|---|------|---|
| RP11-269F19 | 0,108746866 | 0,072181707  | 0 | N.A. | 0 |
| STAT4       | 0,10868641  | -0,037110422 | 0 | N.A. | 0 |
| SERF1B      | 0,108683708 |              | 0 | N.A. | 0 |
| RP11-54A4.2 | 0,108643778 |              | 0 | N.A. | 0 |
| PCP4L1      | 0,108587419 |              | 0 | N.A. | 0 |
| SLC39A5     | 0,108581756 | -0,097454087 | 0 | N.A. | 0 |
| CTD-2583P5. | 0,108569898 | -0,027339268 | 0 | N.A. | 0 |
| IPO13       | 0,108528481 | 0,189627608  | 0 | N.A. | 0 |
| ERVH48-1    | 0,108527971 | 0,162648886  | 0 | N.A. | 0 |
| TRIM23      | 0,108472873 | -0,104032129 | 0 | N.A. | 0 |
| CR1         | 0,108458714 |              | 0 | N.A. | 0 |
| KCND3       | 0,108442454 | 0,025019817  | 0 | N.A. | 0 |
| ZNF454      | 0,108390957 | -0,079040791 | 0 | N.A. | 0 |
| CTD-2035E11 | 0,108387274 | 0,199239915  | 0 | N.A. | 0 |
| XXyac-YM210 | 0,108365837 | -0,103122896 | 0 | N.A. | 0 |
| ABCA7       | 0,108310356 | 0,502199039  | 0 | N.A. | 0 |
| RP11-147L13 | 0,108301517 | -0,017779297 | 0 | N.A. | 0 |
| AC046143.3  | 0,10827016  | -0,127288378 | 0 | N.A. | 0 |
| ATL1        | 0,108243332 | 0,177502477  | 0 | N.A. | 0 |
| LINC00216   | 0,108171832 |              | 0 | N.A. | 0 |
| PPP3R1      | 0,108098078 | 0,197620609  | 0 | N.A. | 0 |
| FBXO31      | 0,10808609  | 0,061412217  | 0 | N.A. | 0 |
| LRRC8E      | 0,108029475 | 0,286511491  | 0 | N.A. | 0 |
| CTD-2213F21 | 0,108018405 |              | 0 | N.A. | 0 |
| ZFAS1       | 0,10797174  | -0,148752577 | 0 | N.A. | 0 |
| BCAS4       | 0,107946716 | 0,305639977  | 0 | N.A. | 0 |
| RP11-380D23 | 0,107898818 | 0,240409654  | 0 | N.A. | 0 |
| APOOL       | 0,107886134 | 0,031246705  | 0 | N.A. | 0 |
| SCGB3A2     | 0,107866793 |              | 0 | N.A. | 0 |
| LINC01473   | 0,107802817 | -0,0185218   | 0 | N.A. | 0 |
| LINC01348   | 0,107754745 | 0,051258979  | 0 | N.A. | 0 |
| TAF4        | 0,107738279 | 0,005377915  | 0 | N.A. | 0 |
| CTB-25B13.1 | 0,107661334 | 0,200394063  | 0 | N.A. | 0 |

|             |             |              |   |      |   |
|-------------|-------------|--------------|---|------|---|
| CCL5        | 0,107629186 | -0,142211703 | 0 | N.A. | 0 |
| PSPN        | 0,10759682  | 0,009955173  | 0 | N.A. | 0 |
| PVRL3       | 0,107569189 | 0,23328223   | 0 | N.A. | 0 |
| RP11-108P20 | 0,107521618 | 0,284847226  | 0 | N.A. | 0 |
| BST2        | 0,107451971 | 0,264725103  | 0 | N.A. | 0 |
| KDF1        | 0,107381154 | 0,460856679  | 0 | N.A. | 0 |
| RP3-337H4.9 | 0,107355137 | -0,108311364 | 0 | N.A. | 0 |
| PRMT8       | 0,107327286 | -0,174418933 | 0 | N.A. | 0 |
| ZNF701      | 0,107310821 | 0,345463382  | 0 | N.A. | 0 |
| RP11-10C24. | 0,107264844 | 0,112430973  | 0 | N.A. | 0 |
| CYB561D1    | 0,107252458 | 0,059473266  | 0 | N.A. | 0 |
| RP11-168F9. | 0,107238906 | -0,005169762 | 0 | N.A. | 0 |
| LINC00667   | 0,107237413 | -0,306587559 | 0 | N.A. | 0 |
| RP5-1112D6. | 0,107236928 | 0,2851716    | 0 | N.A. | 0 |
| CEP76       | 0,107236674 | 0,052131348  | 0 | N.A. | 0 |
| SSTR2       | 0,107206597 |              | 0 | N.A. | 0 |
| IGLV3-25    | 0,107168574 | -0,103291146 | 0 | N.A. | 0 |
| C6orf1      | 0,107131852 | 0,326952888  | 0 | N.A. | 0 |
| ZNF28       | 0,107128118 | -0,146068514 | 0 | N.A. | 0 |
| LA16c-349E1 | 0,107124881 |              | 0 | N.A. | 0 |
| HIC1        | 0,10706776  | -0,267065536 | 0 | N.A. | 0 |
| ATP6V1E1    | 0,107048092 | 0,288543986  | 0 | N.A. | 0 |
| PIWIL2      | 0,107032368 | -0,081210652 | 0 | N.A. | 0 |
| PHF13       | 0,107018839 | 0,101404742  | 0 | N.A. | 0 |
| FAM131C     | 0,10697929  | 0,259673452  | 0 | N.A. | 0 |
| RP11-875O1  | 0,106959852 |              | 0 | N.A. | 0 |
| PCDH19      | 0,106935524 | -0,102648329 | 0 | N.A. | 0 |
| TCHH        | 0,106927726 | 0,165184646  | 0 | N.A. | 0 |
| RP11-745L13 | 0,106910664 | -0,078534737 | 0 | N.A. | 0 |
| RP11-798L4. | 0,106897941 | 0,089287259  | 0 | N.A. | 0 |
| RP11-505P4. | 0,106847331 | 0,357671948  | 0 | N.A. | 0 |
| RAB33A      | 0,106818619 | 0,291966829  | 0 | N.A. | 0 |
| FAM8A1      | 0,106808208 | 0,265230334  | 0 | N.A. | 0 |

|              |             |              |   |      |   |
|--------------|-------------|--------------|---|------|---|
| CCL3         | 0,106799455 | 0,180581727  | 0 | N.A. | 0 |
| TXNDC11      | 0,106777508 | 0,129412747  | 0 | N.A. | 0 |
| PDXP         | 0,106768683 | 0,002490779  | 0 | N.A. | 0 |
| HPS1         | 0,106749445 | 0,108060957  | 0 | N.A. | 0 |
| CSF2RB       | 0,106745676 | -0,040083945 | 0 | N.A. | 0 |
| EPB42        | 0,106710994 | -0,014272    | 0 | N.A. | 0 |
| SNED1        | 0,106651748 | -0,01815087  | 0 | N.A. | 0 |
| SGSH         | 0,106645394 | 0,207775065  | 0 | N.A. | 0 |
| CDR2L        | 0,106604135 | 0,39297425   | 0 | N.A. | 0 |
| SRGAP3       | 0,106549744 | 0,017828297  | 0 | N.A. | 0 |
| RP11-3D4.3   | 0,106539973 | 0,255234424  | 0 | N.A. | 0 |
| ETV7         | 0,106462095 | -0,084921804 | 0 | N.A. | 0 |
| ZNF526       | 0,10641434  | 0,052858496  | 0 | N.A. | 0 |
| PDZK1        | 0,106368466 | 0,162523355  | 0 | N.A. | 0 |
| COL12A1      | 0,106349083 | -0,276916676 | 0 | N.A. | 0 |
| DUSP22       | 0,106303534 | 0,132772197  | 0 | N.A. | 0 |
| DNAJC1       | 0,106299614 | 0,444546175  | 0 | N.A. | 0 |
| CLGN         | 0,106277812 | 0,159039127  | 0 | N.A. | 0 |
| RP11-227G15  | 0,10623965  | 0,125788388  | 0 | N.A. | 0 |
| RP11-379F4.1 | 0,106201815 |              | 0 | N.A. | 0 |
| MUCL1        | 0,106177346 | -0,01741135  | 0 | N.A. | 0 |
| AC002429.5   | 0,106167431 |              | 0 | N.A. | 0 |
| RSRP1        | 0,106112881 | 0,380620473  | 0 | N.A. | 0 |
| POPDC3       | 0,106104848 | 0,236762774  | 0 | N.A. | 0 |
| TEKT3        | 0,106084175 | 0,374153739  | 0 | N.A. | 0 |
| ZNF467       | 0,106062102 | 0,164359558  | 0 | N.A. | 0 |
| CTLA4        | 0,10604429  | 0,122569603  | 0 | N.A. | 0 |
| ZFYVE16      | 0,106034511 | 0,172144725  | 0 | N.A. | 0 |
| NBPF15       | 0,106033983 | 0,442814913  | 0 | N.A. | 0 |
| CARNS1       | 0,106014595 | 0,082445827  | 0 | N.A. | 0 |
| C18orf8      | 0,105994537 | 0,148259817  | 0 | N.A. | 0 |
| HSPA12A      | 0,105988707 | 0,029434541  | 0 | N.A. | 0 |
| VPS8         | 0,105972604 | 0,400167804  | 0 | N.A. | 0 |

|              |             |              |   |      |   |
|--------------|-------------|--------------|---|------|---|
| RAB33B       | 0,105890273 | 0,019027055  | 0 | N.A. | 0 |
| C2orf72      | 0,10588963  | -0,039264925 | 0 | N.A. | 0 |
| GOLGA7       | 0,105881618 | -0,123712052 | 0 | N.A. | 0 |
| TBRG1        | 0,105816379 | 0,185106347  | 0 | N.A. | 0 |
| CD79A        | 0,105804789 | -0,096319916 | 0 | N.A. | 0 |
| GANC         | 0,105723755 | 0,055172237  | 0 | N.A. | 0 |
| RP11-278A23  | 0,105706824 | -0,018479215 | 0 | N.A. | 0 |
| RP11-567M1   | 0,105682756 | 0,412043719  | 0 | N.A. | 0 |
| CYP51A1-AS1  | 0,105674155 | 0,029984088  | 0 | N.A. | 0 |
| EPCAM        | 0,105658045 | 0,393873483  | 0 | N.A. | 0 |
| RP11-42I10.1 | 0,105637167 | 0,30677839   | 0 | N.A. | 0 |
| KLHL38       | 0,105585409 |              | 0 | N.A. | 0 |
| RP13-131K19  | 0,105551578 | 0,010338502  | 0 | N.A. | 0 |
| RP5-1024G6.  | 0,105513127 | -0,241054314 | 0 | N.A. | 0 |
| CRYBA4       | 0,105502668 | 0,049402582  | 0 | N.A. | 0 |
| RP11-478J18  | 0,105499974 | 0,097631928  | 0 | N.A. | 0 |
| CH17-408M7   | 0,105412559 |              | 0 | N.A. | 0 |
| ZNF609       | 0,105376797 | 0,131862342  | 0 | N.A. | 0 |
| ZC3H12A      | 0,105368718 | 0,377550445  | 0 | N.A. | 0 |
| FCHSD2       | 0,105357338 | -0,285740375 | 0 | N.A. | 0 |
| KYNU         | 0,105355274 | -0,108589606 | 0 | N.A. | 0 |
| WDR11-AS1    | 0,105332137 | -0,012144447 | 0 | N.A. | 0 |
| RP11-371F15  | 0,105331435 | -0,004853005 | 0 | N.A. | 0 |
| FBXO8        | 0,105324718 | 0,056425034  | 0 | N.A. | 0 |
| AC004754.3   | 0,105264613 | -0,168946367 | 0 | N.A. | 0 |
| ABCA1        | 0,10520592  | 0,053755475  | 0 | N.A. | 0 |
| MYH11        | 0,105161678 | 0,049050603  | 0 | N.A. | 0 |
| ANXA6        | 0,105160003 | 0,319343648  | 0 | N.A. | 0 |
| SLC9C1       | 0,105155154 | -0,083683958 | 0 | N.A. | 0 |
| RP11-513M1   | 0,105117689 | 0,159985552  | 0 | N.A. | 0 |
| ABCA2        | 0,10510679  | 0,360450223  | 0 | N.A. | 0 |
| AC010761.8   | 0,105020172 | -0,10855882  | 0 | N.A. | 0 |
| SRP14-AS1    | 0,105007509 | -0,179572754 | 0 | N.A. | 0 |

|             |             |              |   |      |   |
|-------------|-------------|--------------|---|------|---|
| RP11-422P24 | 0,104994425 | 0,136022448  | 0 | N.A. | 0 |
| NBPF10      | 0,104980488 | 0,168212943  | 0 | N.A. | 0 |
| RP11-329B9. | 0,104954715 |              | 0 | N.A. | 0 |
| NAV2-AS3    | 0,104950172 |              | 0 | N.A. | 0 |
| RP3-393E18. | 0,104945507 |              | 0 | N.A. | 0 |
| RP1-79C4.4  | 0,104935979 |              | 0 | N.A. | 0 |
| RP11-187E13 | 0,104924355 | 0,258844189  | 0 | N.A. | 0 |
| EPB41L4A    | 0,104889904 | 0,11897641   | 0 | N.A. | 0 |
| ANKS1A      | 0,104831964 | 0,272741137  | 0 | N.A. | 0 |
| FPR3        | 0,104783418 | -0,053497345 | 0 | N.A. | 0 |
| CCR4        | 0,104743624 | -0,261308659 | 0 | N.A. | 0 |
| DCAF10      | 0,104681655 | -0,036660018 | 0 | N.A. | 0 |
| PPP1R9A     | 0,104631482 | 0,099302475  | 0 | N.A. | 0 |
| NLK         | 0,104622464 | -0,049917568 | 0 | N.A. | 0 |
| ZNF200      | 0,104536059 | 0,026850641  | 0 | N.A. | 0 |
| ZBTB33      | 0,10451804  | -0,054563229 | 0 | N.A. | 0 |
| LDB1        | 0,104488334 | -0,071186865 | 0 | N.A. | 0 |
| TCAIM       | 0,104484457 | -0,276761136 | 0 | N.A. | 0 |
| ADRB2       | 0,104478219 | 0,089815832  | 0 | N.A. | 0 |
| MURC        | 0,104452562 | 0,019331958  | 0 | N.A. | 0 |
| TTYH1       | 0,104436407 | 0,213752203  | 0 | N.A. | 0 |
| SIK2        | 0,104413515 | 0,030139763  | 0 | N.A. | 0 |
| ZNF101      | 0,104413483 | -0,342519098 | 0 | N.A. | 0 |
| UPF1        | 0,104400673 | 0,230529526  | 0 | N.A. | 0 |
| GCNT2       | 0,104394204 | 0,016108412  | 0 | N.A. | 0 |
| RP11-67L2.2 | 0,104366974 | 0,136766487  | 0 | N.A. | 0 |
| TP53AIP1    | 0,104318882 | -0,023614322 | 0 | N.A. | 0 |
| RTTN        | 0,104313124 | 0,206301355  | 0 | N.A. | 0 |
| TRIM21      | 0,104291933 | 0,109102355  | 0 | N.A. | 0 |
| NFKBIL1     | 0,10426842  | -0,183910054 | 0 | N.A. | 0 |
| GSE1        | 0,104257595 | 0,091125179  | 0 | N.A. | 0 |
| FGF3        | 0,104207925 |              | 0 | N.A. | 0 |
| AC004019.13 | 0,104204855 | 0,199857444  | 0 | N.A. | 0 |

|             |             |              |   |      |   |
|-------------|-------------|--------------|---|------|---|
| NAV1        | 0,104203754 | -0,151490896 | 0 | N.A. | 0 |
| SPDYA       | 0,104167936 | -0,201349799 | 0 | N.A. | 0 |
| CASC9       | 0,104166858 | -0,079698864 | 0 | N.A. | 0 |
| NUAK1       | 0,104162797 | 0,008749927  | 0 | N.A. | 0 |
| LINC01290   | 0,104072347 | -0,014707639 | 0 | N.A. | 0 |
| TMEM134     | 0,104018757 | 0,215597376  | 0 | N.A. | 0 |
| CTD-2147F2. | 0,103969759 | 0,08213459   | 0 | N.A. | 0 |
| CEBPE       | 0,103966793 | 0,037257953  | 0 | N.A. | 0 |
| CTA-276F8.1 | 0,103959538 | 0,013576345  | 0 | N.A. | 0 |
| ZNF674      | 0,103884891 | 0,356183954  | 0 | N.A. | 0 |
| SPI1        | 0,103865466 | -0,215793151 | 0 | N.A. | 0 |
| SLC25A25-AS | 0,103854054 | 0,177135393  | 0 | N.A. | 0 |
| PSD         | 0,103777048 | 0,096668971  | 0 | N.A. | 0 |
| TBX15       | 0,103742835 |              | 0 | N.A. | 0 |
| ZDHHC17     | 0,103699672 | 0,019539767  | 0 | N.A. | 0 |
| LINC00893   | 0,10368184  | 0,115400863  | 0 | N.A. | 0 |
| SPON1       | 0,103669882 | 0,218852011  | 0 | N.A. | 0 |
| NAPRT       | 0,103598951 | 0,455787986  | 0 | N.A. | 0 |
| PROM2       | 0,103596406 | 0,156797057  | 0 | N.A. | 0 |
| SMPDL3B     | 0,103592954 | 0,215731839  | 0 | N.A. | 0 |
| RP11-437B10 | 0,103568819 | -0,045938242 | 0 | N.A. | 0 |
| KIAA0391    | 0,10355025  | -0,058218665 | 0 | N.A. | 0 |
| RYK         | 0,103498213 | 0,225815204  | 0 | N.A. | 0 |
| ZNF518A     | 0,103491009 | 0,212571563  | 0 | N.A. | 0 |
| MID1        | 0,103468646 | 0,100409737  | 0 | N.A. | 0 |
| RBPMS-AS1   | 0,103420428 | -0,057927653 | 0 | N.A. | 0 |
| CCL3L3      | 0,103401511 | 0,099120965  | 0 | N.A. | 0 |
| SERTAD4     | 0,103305258 | 0,03091906   | 0 | N.A. | 0 |
| PCYOX1      | 0,103250714 | 0,326428391  | 0 | N.A. | 0 |
| ADRA2B      | 0,103238846 | 0,056556168  | 0 | N.A. | 0 |
| RP11-109E12 | 0,103157831 | -0,176578092 | 0 | N.A. | 0 |
| WSCD1       | 0,103130463 | -0,001767161 | 0 | N.A. | 0 |
| CNTNAP1     | 0,103095991 | 0,014959771  | 0 | N.A. | 0 |



|             |             |              |   |      |   |
|-------------|-------------|--------------|---|------|---|
| SPTB        | 0,103077316 | 0,220573294  | 0 | N.A. | 0 |
| AKNAD1      | 0,103075912 | -0,06304435  | 0 | N.A. | 0 |
| PRKACB      | 0,103047618 | 0,070948512  | 0 | N.A. | 0 |
| RP11-83A24. | 0,10294786  | -0,20785138  | 0 | N.A. | 0 |
| SLC25A53    | 0,102947382 | 0,044678436  | 0 | N.A. | 0 |
| WNT10A      | 0,102937215 | 0,138092077  | 0 | N.A. | 0 |
| RP4-565E6.1 | 0,102926927 |              | 0 | N.A. | 0 |
| GMDS-AS1    | 0,102923025 | 0,051809754  | 0 | N.A. | 0 |
| RP11-290D2. | 0,102889684 | -0,110689557 | 0 | N.A. | 0 |
| TRAF3IP2    | 0,102845946 | -0,05741181  | 0 | N.A. | 0 |
| CCSER1      | 0,10275721  | 0,178419142  | 0 | N.A. | 0 |
| CNFN        | 0,102749593 | -0,091186203 | 0 | N.A. | 0 |
| RP11-540O1  | 0,102736225 |              | 0 | N.A. | 0 |
| RP11-378A13 | 0,10272968  | 0,005607158  | 0 | N.A. | 0 |
| PLEKHG7     | 0,102657393 | 0,095375319  | 0 | N.A. | 0 |
| ASMT        | 0,102576009 |              | 0 | N.A. | 0 |
| KIAA2013    | 0,102560004 | 0,483610317  | 0 | N.A. | 0 |
| CHML        | 0,102555412 | -0,090923991 | 0 | N.A. | 0 |
| GRIN3A      | 0,102548473 | 0,084818864  | 0 | N.A. | 0 |
| CTD-3157E16 | 0,102484882 | 0,103576967  | 0 | N.A. | 0 |
| CDR2        | 0,102478123 | 0,05731986   | 0 | N.A. | 0 |
| SEC14L2     | 0,10245083  | 0,330908136  | 0 | N.A. | 0 |
| TNXB        | 0,102439496 | -0,108850671 | 0 | N.A. | 0 |
| MT-ND4      | 0,102370869 | 0,367258394  | 0 | N.A. | 0 |
| ACRC        | 0,102361108 | 0,003027782  | 0 | N.A. | 0 |
| RP13-753N3. | 0,102201027 | -0,113528052 | 0 | N.A. | 0 |
| AC004510.3  | 0,102179979 | 0,078807592  | 0 | N.A. | 0 |
| VPS13A      | 0,102165966 | 0,331120563  | 0 | N.A. | 0 |
| FAM156B     | 0,102109552 | 0,028201655  | 0 | N.A. | 0 |
| COL6A3      | 0,102096207 | -0,217730672 | 0 | N.A. | 0 |
| PTHLH       | 0,102093497 | 0,44211776   | 0 | N.A. | 0 |
| PIGQ        | 0,102086467 | 0,204304252  | 0 | N.A. | 0 |
| C17orf107   | 0,102006532 |              | 0 | N.A. | 0 |

|             |             |              |   |      |   |
|-------------|-------------|--------------|---|------|---|
| DGCR6       | 0,101983931 | -0,20804031  | 0 | N.A. | 0 |
| MAP2K7      | 0,101957186 | 0,071776967  | 0 | N.A. | 0 |
| IGKV6-21    | 0,101947533 |              | 0 | N.A. | 0 |
| LGALS3BP    | 0,101947443 | 0,523328131  | 0 | N.A. | 0 |
| RP11-680F20 | 0,101800986 |              | 0 | N.A. | 0 |
| HORMAD1     | 0,101791663 | 0,043898844  | 0 | N.A. | 0 |
| RP11-324O2  | 0,101767261 | 0,408074734  | 0 | N.A. | 0 |
| ISPD        | 0,101751297 | -0,158006383 | 0 | N.A. | 0 |
| RP3-512B11  | 0,10174889  | 0,241185069  | 0 | N.A. | 0 |
| KMT2D       | 0,101647851 | 0,101033328  | 0 | N.A. | 0 |
| QRICH1      | 0,1016018   | 0,024219056  | 0 | N.A. | 0 |
| CAPZA1      | 0,101566302 | 0,215442497  | 0 | N.A. | 0 |
| TYROBP      | 0,101524295 | -0,190112153 | 0 | N.A. | 0 |
| ZBED9       | 0,101504717 | -0,068146026 | 0 | N.A. | 0 |
| CEBPD       | 0,101485102 | 0,141084956  | 0 | N.A. | 0 |
| RP11-10N16  | 0,101478529 | 0,194761084  | 0 | N.A. | 0 |
| LINC00475   | 0,10146189  |              | 0 | N.A. | 0 |
| MFSD1       | 0,101457828 | 0,036182486  | 0 | N.A. | 0 |
| SNX11       | 0,101421648 | 0,035195576  | 0 | N.A. | 0 |
| DCLK1       | 0,101406524 | -0,056663581 | 0 | N.A. | 0 |
| DHDH        | 0,101391521 | -0,010879155 | 0 | N.A. | 0 |
| SLAMF6      | 0,101317945 |              | 0 | N.A. | 0 |
| C1orf61     | 0,101304336 |              | 0 | N.A. | 0 |
| LSINCT5     | 0,10130374  | -0,209743252 | 0 | N.A. | 0 |
| PDGFD       | 0,101278491 |              | 0 | N.A. | 0 |
| TECPR1      | 0,101278043 | 0,197114628  | 0 | N.A. | 0 |
| ZFP36       | 0,101232815 | 0,521803688  | 0 | N.A. | 0 |
| DVL3        | 0,101224929 | 0,307632169  | 0 | N.A. | 0 |
| AC145343.2  | 0,101143529 | 0,001093438  | 0 | N.A. | 0 |
| TCAF2       | 0,101131828 | 0,226908091  | 0 | N.A. | 0 |
| TMEM132D    | 0,101033216 |              | 0 | N.A. | 0 |
| GLIPR1L2    | 0,101004315 | 0,243032407  | 0 | N.A. | 0 |
| C16orf74    | 0,100994366 | 0,010802712  | 0 | N.A. | 0 |

|              |             |              |   |      |   |
|--------------|-------------|--------------|---|------|---|
| TM9SF1       | 0,100964918 | 0,29586853   | 0 | N.A. | 0 |
| TADA2B       | 0,100955954 | 0,304766347  | 0 | N.A. | 0 |
| NBPF19       | 0,100953038 | -0,112686631 | 0 | N.A. | 0 |
| CCL7         | 0,100908249 | -0,186745537 | 0 | N.A. | 0 |
| BRD2         | 0,100887086 | 0,066969911  | 0 | N.A. | 0 |
| SH3BP5-AS1   | 0,100839832 | 0,223811472  | 0 | N.A. | 0 |
| SOX13        | 0,100826393 | 0,464157767  | 0 | N.A. | 0 |
| RP1-197B17.  | 0,100605424 | 0,070345581  | 0 | N.A. | 0 |
| PHGR1        | 0,100563694 | -0,088742082 | 0 | N.A. | 0 |
| ZDHHC1       | 0,10055023  | 0,143477967  | 0 | N.A. | 0 |
| AL591893.1   | 0,100512645 | 0,146183486  | 0 | N.A. | 0 |
| AC114271.2   | 0,10049914  | -0,165164531 | 0 | N.A. | 0 |
| GBE1         | 0,100480962 | 0,072040049  | 0 | N.A. | 0 |
| DYNLL2       | 0,10047835  | 0,096817276  | 0 | N.A. | 0 |
| RP11-77K12.  | 0,100463016 | 0,327646795  | 0 | N.A. | 0 |
| RP11-176N18  | 0,100432185 |              | 0 | N.A. | 0 |
| WDR6         | 0,100426098 | 0,133608127  | 0 | N.A. | 0 |
| RP11-70D24.  | 0,100419537 |              | 0 | N.A. | 0 |
| CTC-550B14.  | 0,100409738 | 0,141985551  | 0 | N.A. | 0 |
| HCAR3        | 0,100324113 | 0,024274556  | 0 | N.A. | 0 |
| PPRC1        | 0,100315985 | 0,018858505  | 0 | N.A. | 0 |
| AC079466.1   | 0,100315238 | 0,20422862   | 0 | N.A. | 0 |
| RP11-385F7.  | 0,100315155 | 0,074033526  | 0 | N.A. | 0 |
| LA16c-60D12  | 0,100268971 | 0,034592226  | 0 | N.A. | 0 |
| ADPRM        | 0,100192866 | 0,281630908  | 0 | N.A. | 0 |
| CTC-529P8.1  | 0,100188333 | 0,091961746  | 0 | N.A. | 0 |
| AC016549.1   | 0,100171047 | 0,027793494  | 0 | N.A. | 0 |
| GJB2         | 0,100164661 | 0,508390304  | 0 | N.A. | 0 |
| BAI2         | 0,100155456 | 0,02460933   | 0 | N.A. | 0 |
| SNAI2        | 0,100133868 | -0,17898299  | 0 | N.A. | 0 |
| RP11-78I14.1 | 0,100106612 | 0,098657128  | 0 | N.A. | 0 |
| FAM47E       | 0,100089176 | 0,329047302  | 0 | N.A. | 0 |
| AQPEP        | 0,100007657 | 0,252979314  | 0 | N.A. | 0 |

|              |             |              |   |      |   |
|--------------|-------------|--------------|---|------|---|
| SYCE3        | 0,100003513 | 0,183762068  | 0 | N.A. | 0 |
| MBD5         | 0,099955032 | 0,274243651  | 0 | N.A. | 0 |
| ATP6V1F      | 0,099954617 | -0,051004103 | 0 | N.A. | 0 |
| SCUBE2       | 0,099912533 |              | 0 | N.A. | 0 |
| WDR47        | 0,099903183 | 0,114980313  | 0 | N.A. | 0 |
| RP11-356J5.1 | 0,099866516 | -0,138587374 | 0 | N.A. | 0 |
| LIX1L        | 0,099798848 | -0,070419472 | 0 | N.A. | 0 |
| CTD-2619J13  | 0,099786703 |              | 0 | N.A. | 0 |
| MED26        | 0,099769776 | 0,36579545   | 0 | N.A. | 0 |
| ZNF493       | 0,099755468 | -0,076999807 | 0 | N.A. | 0 |
| RP11-927P21  | 0,099692997 | 0,13498633   | 0 | N.A. | 0 |
| RP11-23P13.  | 0,099663998 | -0,053553351 | 0 | N.A. | 0 |
| RP11-80H18.  | 0,099629094 |              | 0 | N.A. | 0 |
| DIRAS2       | 0,099620944 |              | 0 | N.A. | 0 |
| LRRC3-AS1    | 0,099617288 |              | 0 | N.A. | 0 |
| ONECUT2      | 0,099605102 | 0,394348781  | 0 | N.A. | 0 |
| JAZF1        | 0,09949043  | 0,285235938  | 0 | N.A. | 0 |
| GORASP1      | 0,09941552  | 0,06173335   | 0 | N.A. | 0 |
| BBOX1-AS1    | 0,099350032 | -0,058138537 | 0 | N.A. | 0 |
| CAPN14       | 0,099341831 |              | 0 | N.A. | 0 |
| WAC-AS1      | 0,099336195 | 0,146057373  | 0 | N.A. | 0 |
| GPS2         | 0,099332238 | -0,166223811 | 0 | N.A. | 0 |
| RP11-56D16.  | 0,099315068 | -0,046155065 | 0 | N.A. | 0 |
| LINC00504    | 0,099281863 | 0,111036769  | 0 | N.A. | 0 |
| ARHGDI1A     | 0,099277615 | 0,139832435  | 0 | N.A. | 0 |
| ARHGAP6      | 0,099255114 | 0,171072929  | 0 | N.A. | 0 |
| CCL14        | 0,099246195 | 0,049523928  | 0 | N.A. | 0 |
| NICN1        | 0,099187096 | 0,286254452  | 0 | N.A. | 0 |
| RP11-61A14.  | 0,099154871 | -0,052196309 | 0 | N.A. | 0 |
| RP11-449H3.  | 0,099142696 | -0,233124861 | 0 | N.A. | 0 |
| NKPD1        | 0,099134462 |              | 0 | N.A. | 0 |
| GACAT2       | 0,099050067 | -0,140056111 | 0 | N.A. | 0 |
| AC093495.4   | 0,098967051 | 0,200950205  | 0 | N.A. | 0 |

|             |             |              |   |      |   |
|-------------|-------------|--------------|---|------|---|
| FAM209A     | 0,098880753 |              | 0 | N.A. | 0 |
| LINC00997   | 0,098875835 | 0,09466081   | 0 | N.A. | 0 |
| LINC01252   | 0,098866257 | -0,133184947 | 0 | N.A. | 0 |
| RP11-338N10 | 0,0988535   |              | 0 | N.A. | 0 |
| WDR1        | 0,098807449 | 0,053342942  | 0 | N.A. | 0 |
| ZDHHC21     | 0,098789681 | 0,260525782  | 0 | N.A. | 0 |
| UBE2F-SCLY  | 0,098725083 | 0,035845837  | 0 | N.A. | 0 |
| FAM231D     | 0,098665347 | -0,118966107 | 0 | N.A. | 0 |
| POPDC2      | 0,098659467 | 0,133469637  | 0 | N.A. | 0 |
| TMEM47      | 0,098653169 | 0,19917539   | 0 | N.A. | 0 |
| ABCA10      | 0,098628635 | 0,321641699  | 0 | N.A. | 0 |
| ZBTB42      | 0,098603301 | 0,26902105   | 0 | N.A. | 0 |
| CEACAM4     | 0,098596756 |              | 0 | N.A. | 0 |
| AC079807.2  | 0,098540133 | 0,069422794  | 0 | N.A. | 0 |
| RP11-96C21. | 0,098539317 |              | 0 | N.A. | 0 |
| RP11-631N10 | 0,098468138 | 0,329225934  | 0 | N.A. | 0 |
| RP11-23E19. | 0,098458075 |              | 0 | N.A. | 0 |
| SPATA41     | 0,098451969 | -0,1894047   | 0 | N.A. | 0 |
| NEU4        | 0,098444539 | 0,320729923  | 0 | N.A. | 0 |
| C10orf113   | 0,098436851 | 0,284389163  | 0 | N.A. | 0 |
| TLL1        | 0,098432316 | -0,117567576 | 0 | N.A. | 0 |
| RP11-774O3. | 0,098377013 |              | 0 | N.A. | 0 |
| RGS3        | 0,098362146 | 0,182352064  | 0 | N.A. | 0 |
| RP11-302B13 | 0,098337749 | -0,175793959 | 0 | N.A. | 0 |
| MKX         | 0,098280764 |              | 0 | N.A. | 0 |
| SYNJ2BP     | 0,098250452 | 0,184035639  | 0 | N.A. | 0 |
| KCNQ4       | 0,09824258  | 0,15330894   | 0 | N.A. | 0 |
| GRAMD1B     | 0,098238624 | 0,412969663  | 0 | N.A. | 0 |
| CHSY3       | 0,098161172 |              | 0 | N.A. | 0 |
| SFR1        | 0,098111482 | -0,004154567 | 0 | N.A. | 0 |
| RP11-710F7. | 0,097999134 | 0,062303235  | 0 | N.A. | 0 |
| FAM157C     | 0,09798102  | -0,085114177 | 0 | N.A. | 0 |
| LRRC8C      | 0,097976474 | 0,224777037  | 0 | N.A. | 0 |

|              |             |              |   |      |   |
|--------------|-------------|--------------|---|------|---|
| HCAR1        | 0,097960862 | -0,01471427  | 0 | N.A. | 0 |
| CA14         | 0,097907207 | -0,248965259 | 0 | N.A. | 0 |
| C18orf25     | 0,097902907 | 0,445192903  | 0 | N.A. | 0 |
| RBAK-RBAKD   | 0,097870489 | -0,048946555 | 0 | N.A. | 0 |
| KLHL6-AS1    | 0,097847538 |              | 0 | N.A. | 0 |
| YEATS2       | 0,097843796 | 0,341378371  | 0 | N.A. | 0 |
| RP11-5C23.1  | 0,097830147 | 0,046316698  | 0 | N.A. | 0 |
| ATXN2        | 0,097798928 | 0,186778429  | 0 | N.A. | 0 |
| ZNF155       | 0,097721422 | 0,087562981  | 0 | N.A. | 0 |
| ZNF320       | 0,097659645 | 0,094860825  | 0 | N.A. | 0 |
| ZNF441       | 0,097656516 | -0,182796733 | 0 | N.A. | 0 |
| ITPKA        | 0,097654639 | 0,325971108  | 0 | N.A. | 0 |
| RP11-589P10  | 0,097627639 | 0,127379221  | 0 | N.A. | 0 |
| WWTR1-AS1    | 0,097623173 | 0,116479923  | 0 | N.A. | 0 |
| RP11-65J21.3 | 0,097614766 | 0,159761415  | 0 | N.A. | 0 |
| PRRC1        | 0,097550885 | 0,136032292  | 0 | N.A. | 0 |
| C19orf47     | 0,097529703 | 0,052374602  | 0 | N.A. | 0 |
| AP4E1        | 0,097502086 | -0,074560097 | 0 | N.A. | 0 |
| GIT2         | 0,097467584 | 0,043292075  | 0 | N.A. | 0 |
| RHOH         | 0,097452485 | -0,045049333 | 0 | N.A. | 0 |
| RP11-328C8.  | 0,097429339 |              | 0 | N.A. | 0 |
| TM6SF2       | 0,097397416 | -0,265612906 | 0 | N.A. | 0 |
| TMEM198      | 0,097369237 | 0,159735216  | 0 | N.A. | 0 |
| LINC00702    | 0,097335232 |              | 0 | N.A. | 0 |
| RP11-404L6.  | 0,097331426 | 0,247187261  | 0 | N.A. | 0 |
| CA9          | 0,097267992 | 0,181690418  | 0 | N.A. | 0 |
| PPM1L        | 0,097249685 | 0,203456785  | 0 | N.A. | 0 |
| GGPS1        | 0,097134777 | -0,135707729 | 0 | N.A. | 0 |
| MIR181A1HG   | 0,097117338 | -0,193620114 | 0 | N.A. | 0 |
| SLC26A11     | 0,097112169 | -0,000382737 | 0 | N.A. | 0 |
| PSEN2        | 0,097100701 | 0,330571854  | 0 | N.A. | 0 |
| CYP3A7       | 0,097011661 | -0,151611442 | 0 | N.A. | 0 |
| AKAP5        | 0,096997136 | -0,18002681  | 0 | N.A. | 0 |

|             |             |              |   |      |   |
|-------------|-------------|--------------|---|------|---|
| TSPAN9      | 0,096986181 | 0,083282644  | 0 | N.A. | 0 |
| ARHGAP10    | 0,096923777 | -0,100518819 | 0 | N.A. | 0 |
| RSG1        | 0,096922407 | 0,090955839  | 0 | N.A. | 0 |
| RP11-758P17 | 0,096914762 | 0,08556891   | 0 | N.A. | 0 |
| PRKRIP1     | 0,096892418 | -0,007808882 | 0 | N.A. | 0 |
| FOXP2       | 0,096882034 | 0,107940279  | 0 | N.A. | 0 |
| RP11-318C24 | 0,096878203 | -0,039992241 | 0 | N.A. | 0 |
| DNASE1L3    | 0,096859453 |              | 0 | N.A. | 0 |
| ZFYVE9      | 0,096805734 | -0,104407287 | 0 | N.A. | 0 |
| OXCT2       | 0,096715446 | -0,140572428 | 0 | N.A. | 0 |
| NFKBID      | 0,096658995 | -0,05341544  | 0 | N.A. | 0 |
| C14orf28    | 0,096588835 | -0,019427994 | 0 | N.A. | 0 |
| CXorf23     | 0,096519582 | -0,048949466 | 0 | N.A. | 0 |
| ADAMTS9-AS1 | 0,096515556 |              | 0 | N.A. | 0 |
| RP11-281P23 | 0,096415856 |              | 0 | N.A. | 0 |
| ZDHHC11B    | 0,096406657 | 0,097595965  | 0 | N.A. | 0 |
| SESN3       | 0,096359903 | -0,1153304   | 0 | N.A. | 0 |
| IDI2-AS1    | 0,096338284 | 0,22108944   | 0 | N.A. | 0 |
| PDCD4-AS1   | 0,0963229   | 0,164943226  | 0 | N.A. | 0 |
| LINC01443   | 0,096299049 | -0,091880549 | 0 | N.A. | 0 |
| FOLR1       | 0,096270084 | 0,076524243  | 0 | N.A. | 0 |
| STON2       | 0,096239269 | 0,071861353  | 0 | N.A. | 0 |
| ZNF267      | 0,096118276 | 0,192451268  | 0 | N.A. | 0 |
| BANK1       | 0,096084965 | -0,153705806 | 0 | N.A. | 0 |
| RP1-224A6.9 | 0,096040626 | 0,050191573  | 0 | N.A. | 0 |
| LINC00996   | 0,096029354 | -0,000867714 | 0 | N.A. | 0 |
| CLASP2      | 0,096026023 | 0,373707242  | 0 | N.A. | 0 |
| FZD10       | 0,095965732 |              | 0 | N.A. | 0 |
| CPNE5       | 0,095956457 | -0,313359938 | 0 | N.A. | 0 |
| ETV2        | 0,095914058 | -0,102874635 | 0 | N.A. | 0 |
| RP1-278O22  | 0,095874448 | -0,427920896 | 0 | N.A. | 0 |
| C20orf202   | 0,095826205 | -0,045880689 | 0 | N.A. | 0 |
| MED23       | 0,09580757  | 0,254622418  | 0 | N.A. | 0 |

|             |             |              |   |      |   |
|-------------|-------------|--------------|---|------|---|
| USP15       | 0,095794991 | 0,364141541  | 0 | N.A. | 0 |
| NDRG4       | 0,095789323 | 0,11320589   | 0 | N.A. | 0 |
| RP1-266L20. | 0,095724168 |              | 0 | N.A. | 0 |
| SHF         | 0,095693445 | 0,357989945  | 0 | N.A. | 0 |
| SAP130      | 0,095690347 | 0,141094396  | 0 | N.A. | 0 |
| LINC01480   | 0,095674354 | 0,003794093  | 0 | N.A. | 0 |
| ARG2        | 0,095578966 | 0,093566754  | 0 | N.A. | 0 |
| CYP26B1     | 0,09554689  | -0,101750622 | 0 | N.A. | 0 |
| PATE2       | 0,095414741 |              | 0 | N.A. | 0 |
| ZNF286B     | 0,095335943 | -0,008335731 | 0 | N.A. | 0 |
| ATCAY       | 0,09532738  | 0,088828959  | 0 | N.A. | 0 |
| RP11-17M16  | 0,095300686 | 0,132911638  | 0 | N.A. | 0 |
| RP11-225B17 | 0,095299167 | 0,002434434  | 0 | N.A. | 0 |
| RP11-166P13 | 0,095298061 | -0,029262807 | 0 | N.A. | 0 |
| C2orf68     | 0,095267047 | 0,09722953   | 0 | N.A. | 0 |
| AOAH        | 0,095258778 | 0,082724203  | 0 | N.A. | 0 |
| C19orf68    | 0,095221127 | 0,109020284  | 0 | N.A. | 0 |
| NYNRIN      | 0,095204869 | -0,113377563 | 0 | N.A. | 0 |
| PIP4K2A     | 0,095180907 | -0,004005936 | 0 | N.A. | 0 |
| PBX2        | 0,095159519 | -0,047353632 | 0 | N.A. | 0 |
| TMEM106A    | 0,095153905 | 0,379087903  | 0 | N.A. | 0 |
| PLEKHH1     | 0,095069615 | 0,217485323  | 0 | N.A. | 0 |
| CTD-2192J16 | 0,095013305 |              | 0 | N.A. | 0 |
| RP11-367J11 | 0,094962    | 0,133054267  | 0 | N.A. | 0 |
| RP11-284F21 | 0,094916458 | 0,217190039  | 0 | N.A. | 0 |
| SHANK3      | 0,094894863 | -0,131522863 | 0 | N.A. | 0 |
| RASSF5      | 0,094883287 | -0,12924777  | 0 | N.A. | 0 |
| TNS2        | 0,094877163 | -0,024042219 | 0 | N.A. | 0 |
| COL21A1     | 0,094825122 |              | 0 | N.A. | 0 |
| MLC1        | 0,094807889 | 0,012971569  | 0 | N.A. | 0 |
| RP11-864J10 | 0,094796731 | 0,331644082  | 0 | N.A. | 0 |
| C1orf54     | 0,094795593 | -0,167333768 | 0 | N.A. | 0 |
| ALS2        | 0,094719234 | 0,294007372  | 0 | N.A. | 0 |



|              |             |              |   |      |   |
|--------------|-------------|--------------|---|------|---|
| RP4-657D16.  | 0,094680891 | 0,033715252  | 0 | N.A. | 0 |
| RP11-510J16  | 0,094679376 | 0,224467701  | 0 | N.A. | 0 |
| TUBAL3       | 0,094664836 | -0,135137982 | 0 | N.A. | 0 |
| DCLRE1C      | 0,094567401 | 0,017323961  | 0 | N.A. | 0 |
| SPOCK2       | 0,094557496 | -0,167480929 | 0 | N.A. | 0 |
| CNOT11       | 0,09454804  | 0,229329636  | 0 | N.A. | 0 |
| TAF7         | 0,094524973 | 0,236458996  | 0 | N.A. | 0 |
| AC241377.2   | 0,094523042 | 0,165316632  | 0 | N.A. | 0 |
| CTD-2350C19  | 0,094491153 | -0,292081791 | 0 | N.A. | 0 |
| PHLDA1       | 0,094485979 | 0,196077298  | 0 | N.A. | 0 |
| MAD1L1       | 0,094460232 | 0,431728079  | 0 | N.A. | 0 |
| ZNF628       | 0,094414641 | 0,387690503  | 0 | N.A. | 0 |
| PKNOX1       | 0,09439508  | 0,169755917  | 0 | N.A. | 0 |
| FCRL2        | 0,094334264 |              | 0 | N.A. | 0 |
| RP11-563J2.3 | 0,094323168 | 0,167018153  | 0 | N.A. | 0 |
| IAPP         | 0,094321195 | -0,106595088 | 0 | N.A. | 0 |
| LPHN2        | 0,094296311 |              | 0 | N.A. | 0 |
| GTF2IRD2     | 0,094290954 | 0,06130889   | 0 | N.A. | 0 |
| RP11-490M8   | 0,094274477 | -0,150022887 | 0 | N.A. | 0 |
| PRRX1        | 0,094260706 | -0,260822985 | 0 | N.A. | 0 |
| ZKSCAN7      | 0,094229232 |              | 0 | N.A. | 0 |
| ZNF451       | 0,094201365 | 0,194777294  | 0 | N.A. | 0 |
| RP11-379F4.4 | 0,094163067 |              | 0 | N.A. | 0 |
| LINC00987    | 0,094124341 | -0,323550475 | 0 | N.A. | 0 |
| RIC1         | 0,093957892 | 0,242960775  | 0 | N.A. | 0 |
| MFN2         | 0,093941546 | 0,347961232  | 0 | N.A. | 0 |
| RCAN3        | 0,093926986 | 0,190225763  | 0 | N.A. | 0 |
| TANGO2       | 0,093908413 | -0,06055025  | 0 | N.A. | 0 |
| FAIM3        | 0,093862871 | -0,039528233 | 0 | N.A. | 0 |
| LRRC29       | 0,093789817 | -0,128870825 | 0 | N.A. | 0 |
| RP11-304L19  | 0,093788338 | 0,305785978  | 0 | N.A. | 0 |
| RP3-453C12.  | 0,093719579 | -0,078590652 | 0 | N.A. | 0 |
| RNF31        | 0,093706532 | 0,106217832  | 0 | N.A. | 0 |

|             |             |              |   |      |   |
|-------------|-------------|--------------|---|------|---|
| ITPR1       | 0,093695241 | -0,207155651 | 0 | N.A. | 0 |
| SLC39A6     | 0,09357259  | 0,378101513  | 0 | N.A. | 0 |
| UBR5        | 0,093543641 | 0,398916377  | 0 | N.A. | 0 |
| TACC1       | 0,093523286 | 0,035853563  | 0 | N.A. | 0 |
| CCBE1       | 0,093510222 | 0,333407989  | 0 | N.A. | 0 |
| DPYSL2      | 0,093492203 | 0,213784768  | 0 | N.A. | 0 |
| KCNN3       | 0,093309725 | 0,232658727  | 0 | N.A. | 0 |
| PPP4R1-AS1  | 0,093307819 | -0,232991258 | 0 | N.A. | 0 |
| PPP6R3      | 0,093279083 | 0,131073691  | 0 | N.A. | 0 |
| CD81        | 0,093273554 | 0,264247267  | 0 | N.A. | 0 |
| ATP2A1      | 0,093263878 | 0,436874061  | 0 | N.A. | 0 |
| LINC00659   | 0,093256992 | 0,302646339  | 0 | N.A. | 0 |
| TRIM66      | 0,093219293 | 0,25682881   | 0 | N.A. | 0 |
| APH1B       | 0,093203765 | 0,097185842  | 0 | N.A. | 0 |
| RP5-884G6.2 | 0,093193261 | -0,121197903 | 0 | N.A. | 0 |
| RP11-582E3. | 0,093180447 | 0,149406676  | 0 | N.A. | 0 |
| MT-ND2      | 0,093146633 | 0,337869925  | 0 | N.A. | 0 |
| TP53TG1     | 0,093126721 | -0,263722065 | 0 | N.A. | 0 |
| NYAP2       | 0,093120755 | 0,063968822  | 0 | N.A. | 0 |
| RP11-658F2. | 0,093080771 | 0,281900007  | 0 | N.A. | 0 |
| LILRB1      | 0,093042375 |              | 0 | N.A. | 0 |
| SRPX2       | 0,092894913 | 0,443980867  | 0 | N.A. | 0 |
| FAM217B     | 0,092869333 | 0,147083089  | 0 | N.A. | 0 |
| HLA-DRB5    | 0,092828417 | -0,307095344 | 0 | N.A. | 0 |
| PLXDC1      | 0,092828202 | 0,263207075  | 0 | N.A. | 0 |
| RP11-221J22 | 0,09280062  | -0,27283294  | 0 | N.A. | 0 |
| PLLP        | 0,092787034 | 0,368969371  | 0 | N.A. | 0 |
| IMPA1       | 0,092741307 | 0,02489605   | 0 | N.A. | 0 |
| RP11-247A12 | 0,092728383 | 0,129544719  | 0 | N.A. | 0 |
| ATP6V1H     | 0,092706292 | -0,029813322 | 0 | N.A. | 0 |
| KIAA1683    | 0,092693285 | 0,044507839  | 0 | N.A. | 0 |
| AC133644.2  | 0,092692149 | -0,302554371 | 0 | N.A. | 0 |
| NDNF        | 0,092687609 | 0,006261966  | 0 | N.A. | 0 |

|             |             |              |   |      |   |
|-------------|-------------|--------------|---|------|---|
| SLCO3A1     | 0,092669677 | -0,073219622 | 0 | N.A. | 0 |
| FAM159A     | 0,092651925 | -0,159121197 | 0 | N.A. | 0 |
| AKAP11      | 0,092628071 | 0,415444161  | 0 | N.A. | 0 |
| YIPF5       | 0,092611992 | 0,040966738  | 0 | N.A. | 0 |
| RP11-362F19 | 0,092608784 | -0,178006667 | 0 | N.A. | 0 |
| HNF1B       | 0,092575012 | -0,133120756 | 0 | N.A. | 0 |
| POU5F2      | 0,0925649   | -0,081828654 | 0 | N.A. | 0 |
| PCBP1       | 0,092473177 | 0,273594875  | 0 | N.A. | 0 |
| RP11-981P6. | 0,092466375 | 0,202412829  | 0 | N.A. | 0 |
| AC093818.1  | 0,092461122 | 0,023827408  | 0 | N.A. | 0 |
| STAM        | 0,092406373 | 0,230585509  | 0 | N.A. | 0 |
| RP11-982M1  | 0,09237926  | -0,216440479 | 0 | N.A. | 0 |
| LINC01393   | 0,092370046 | 0,007207345  | 0 | N.A. | 0 |
| SLC8A2      | 0,092364631 | -0,06261757  | 0 | N.A. | 0 |
| STX17-AS1   | 0,09236161  | -0,095252123 | 0 | N.A. | 0 |
| TP53TG5     | 0,09235189  | -0,147408673 | 0 | N.A. | 0 |
| SORBS2      | 0,092316683 | 0,199342663  | 0 | N.A. | 0 |
| SLC17A4     | 0,092305531 | 0,137335578  | 0 | N.A. | 0 |
| RP3-414A15. | 0,092302902 | -0,240831748 | 0 | N.A. | 0 |
| SLMO2       | 0,092284318 | -0,078334257 | 0 | N.A. | 0 |
| RP11-1008C2 | 0,092226732 | -0,121511642 | 0 | N.A. | 0 |
| TRIM26      | 0,09221793  | -0,116870294 | 0 | N.A. | 0 |
| RP11-57H14. | 0,092214549 |              | 0 | N.A. | 0 |
| NR1H4       | 0,09221102  | 0,384339391  | 0 | N.A. | 0 |
| ZNF331      | 0,092197933 | 0,095520433  | 0 | N.A. | 0 |
| IER5        | 0,092185126 | 0,330296065  | 0 | N.A. | 0 |
| PPP2R3A     | 0,092176841 | -0,092503253 | 0 | N.A. | 0 |
| MEG3        | 0,092136627 | -0,001527506 | 0 | N.A. | 0 |
| UGT2B17     | 0,092117317 | 0,012044961  | 0 | N.A. | 0 |
| RP4-773N10. | 0,092083325 | 0,09864648   | 0 | N.A. | 0 |
| TSPAN15     | 0,092081409 | 0,587690645  | 0 | N.A. | 0 |
| LINC01553   | 0,09202284  | 0,058641819  | 0 | N.A. | 0 |
| SLC25A34    | 0,091907873 | 0,050941454  | 0 | N.A. | 0 |

|              |             |              |   |      |   |
|--------------|-------------|--------------|---|------|---|
| MTCP1        | 0,09186427  | -0,011199851 | 0 | N.A. | 0 |
| SYT1         | 0,091856197 | 0,274061892  | 0 | N.A. | 0 |
| KCTD21       | 0,09182223  | 0,184100585  | 0 | N.A. | 0 |
| CERK         | 0,0918042   | 0,259114926  | 0 | N.A. | 0 |
| RP11-555G19  | 0,091793301 |              | 0 | N.A. | 0 |
| OLFM2        | 0,091774433 |              | 0 | N.A. | 0 |
| NCS1         | 0,091695572 | -0,210427794 | 0 | N.A. | 0 |
| PDE4B        | 0,09167144  | -0,314823815 | 0 | N.A. | 0 |
| GRM6         | 0,091666783 |              | 0 | N.A. | 0 |
| CES3         | 0,091663966 | -0,013236913 | 0 | N.A. | 0 |
| RNF122       | 0,091617335 | 0,137627635  | 0 | N.A. | 0 |
| SNHG12       | 0,09161424  | 0,216524425  | 0 | N.A. | 0 |
| ENPP5        | 0,091591143 | 0,028023958  | 0 | N.A. | 0 |
| NAGLU        | 0,091535388 | 0,144587869  | 0 | N.A. | 0 |
| SUN2         | 0,09153475  | 0,410729056  | 0 | N.A. | 0 |
| NPHP3        | 0,091479064 | 0,122265586  | 0 | N.A. | 0 |
| F8A1         | 0,091457137 | 0,214059959  | 0 | N.A. | 0 |
| RP11-334C17  | 0,091423993 | 0,110393714  | 0 | N.A. | 0 |
| LINC00444    | 0,09140303  | 0,255715234  | 0 | N.A. | 0 |
| TMCC2        | 0,091343687 | -0,03839173  | 0 | N.A. | 0 |
| INO80B       | 0,091307876 | -0,079394219 | 0 | N.A. | 0 |
| PCDHB14      | 0,091286966 | 0,247491895  | 0 | N.A. | 0 |
| RP11-326G21  | 0,091286378 | 0,19221128   | 0 | N.A. | 0 |
| AC114803.3   | 0,09125004  |              | 0 | N.A. | 0 |
| AC007009.1   | 0,091195155 | -0,06573197  | 0 | N.A. | 0 |
| RP11-1246C1  | 0,091181141 | -0,028084954 | 0 | N.A. | 0 |
| RP11-49I11.1 | 0,091167109 | 0,132922428  | 0 | N.A. | 0 |
| MMAA         | 0,091117547 | 0,140648296  | 0 | N.A. | 0 |
| TRPM6        | 0,091059036 | 0,072102782  | 0 | N.A. | 0 |
| TMEM263      | 0,091052638 | 0,073181028  | 0 | N.A. | 0 |
| IGJ          | 0,090968857 | -0,286501116 | 0 | N.A. | 0 |
| CREB1        | 0,09095761  | 0,195860033  | 0 | N.A. | 0 |
| C5orf66-AS1  | 0,090906458 | -0,004947558 | 0 | N.A. | 0 |

|             |             |              |   |      |   |
|-------------|-------------|--------------|---|------|---|
| GYPC        | 0,090900089 | -0,151108494 | 0 | N.A. | 0 |
| RP11-415F23 | 0,090876365 |              | 0 | N.A. | 0 |
| CELSR1      | 0,090859852 | 0,235325036  | 0 | N.A. | 0 |
| CDIPT       | 0,090764154 | 0,452454082  | 0 | N.A. | 0 |
| RP11-353N14 | 0,090729842 | 0,158756198  | 0 | N.A. | 0 |
| HCN2        | 0,090666966 |              | 0 | N.A. | 0 |
| RP11-622C24 | 0,090632752 |              | 0 | N.A. | 0 |
| GRK4        | 0,090574333 | -0,177698761 | 0 | N.A. | 0 |
| KLC4        | 0,090557696 | 0,361984321  | 0 | N.A. | 0 |
| ACTR3       | 0,090535852 | 0,135100112  | 0 | N.A. | 0 |
| TM9SF4      | 0,090469818 | 0,127423872  | 0 | N.A. | 0 |
| BNIP3       | 0,090422541 | -0,074134763 | 0 | N.A. | 0 |
| RMDN3       | 0,090400946 | 0,171023048  | 0 | N.A. | 0 |
| DRD4        | 0,090396594 | -0,093314446 | 0 | N.A. | 0 |
| CYB561D2    | 0,090356831 | -0,142256804 | 0 | N.A. | 0 |
| DR1         | 0,090311515 | 0,152410479  | 0 | N.A. | 0 |
| JAG2        | 0,090294239 | 0,088875696  | 0 | N.A. | 0 |
| RP11-388M2  | 0,09028593  | 0,339071703  | 0 | N.A. | 0 |
| C15orf26    | 0,090278159 | 0,203086643  | 0 | N.A. | 0 |
| SMG6        | 0,090270198 | 0,255444861  | 0 | N.A. | 0 |
| AC137932.4  | 0,090267351 | -0,032560216 | 0 | N.A. | 0 |
| XXbac-BPG15 | 0,090236902 | 0,091442305  | 0 | N.A. | 0 |
| COG7        | 0,090222627 | 0,156114703  | 0 | N.A. | 0 |
| PWP2        | 0,090159188 | -0,129471633 | 0 | N.A. | 0 |
| CTB-22K21.2 | 0,090125411 |              | 0 | N.A. | 0 |
| AADAC       | 0,090106061 | 0,041975513  | 0 | N.A. | 0 |
| RP11-519G16 | 0,090102713 | 0,109736402  | 0 | N.A. | 0 |
| HAS2        | 0,090097224 | -0,213535198 | 0 | N.A. | 0 |
| AC114730.3  | 0,090084522 | 0,068286904  | 0 | N.A. | 0 |
| NHLRC4      | 0,090082802 | -0,079825225 | 0 | N.A. | 0 |
| VSTM5       | 0,090069198 | 0,098578308  | 0 | N.A. | 0 |
| TP53I13     | 0,089989998 | 0,17748129   | 0 | N.A. | 0 |
| PRRT4       | 0,0899541   |              | 0 | N.A. | 0 |

|             |             |              |   |      |   |
|-------------|-------------|--------------|---|------|---|
| ZNF222      | 0,08994147  | -0,102355808 | 0 | N.A. | 0 |
| OCLM        | 0,089883821 | 0,234508776  | 0 | N.A. | 0 |
| SRF         | 0,089865633 | -0,112289117 | 0 | N.A. | 0 |
| AC093382.1  | 0,08983884  |              | 0 | N.A. | 0 |
| LAIR1       | 0,089833645 | 0,108927063  | 0 | N.A. | 0 |
| SLC30A2     | 0,089814449 | -0,108537858 | 0 | N.A. | 0 |
| LTBP3       | 0,089775457 | 0,221361315  | 0 | N.A. | 0 |
| ARHGAP15    | 0,089746846 | -0,28195753  | 0 | N.A. | 0 |
| RP11-126K1. | 0,089731182 | -0,260793314 | 0 | N.A. | 0 |
| SLC52A1     | 0,0896419   |              | 0 | N.A. | 0 |
| RP11-277P12 | 0,089607352 | -0,139010475 | 0 | N.A. | 0 |
| DQX1        | 0,089572976 | 0,2801829    | 0 | N.A. | 0 |
| ZNF790      | 0,089557201 | 0,079031292  | 0 | N.A. | 0 |
| RP11-809C18 | 0,089553325 |              | 0 | N.A. | 0 |
| RP11-775D22 | 0,089533862 | 0,084769121  | 0 | N.A. | 0 |
| CLIC2       | 0,089525863 | 0,084211603  | 0 | N.A. | 0 |
| CDH16       | 0,089453078 | 0,266840285  | 0 | N.A. | 0 |
| RP11-1223D1 | 0,089421378 |              | 0 | N.A. | 0 |
| PLEKHA2     | 0,089367909 | -0,013894759 | 0 | N.A. | 0 |
| AC108004.3  | 0,089331081 | -0,101297865 | 0 | N.A. | 0 |
| LINC00924   | 0,08932868  |              | 0 | N.A. | 0 |
| C16orf58    | 0,089283784 | 0,248690876  | 0 | N.A. | 0 |
| ZNF384      | 0,089282522 | 0,147047184  | 0 | N.A. | 0 |
| TNRC6B      | 0,089232156 | 0,129936857  | 0 | N.A. | 0 |
| MMP25       | 0,089197352 |              | 0 | N.A. | 0 |
| VGLL3       | 0,089184768 | 0,100220591  | 0 | N.A. | 0 |
| CUL4B       | 0,089169526 | 0,087257516  | 0 | N.A. | 0 |
| RP11-385F5. | 0,089163501 | 0,04927704   | 0 | N.A. | 0 |
| MMGT1       | 0,089138812 | 0,089222033  | 0 | N.A. | 0 |
| BHLHB9      | 0,089082447 | -0,309512185 | 0 | N.A. | 0 |
| RP11-571M6  | 0,089065569 |              | 0 | N.A. | 0 |
| SLA         | 0,089031785 | -0,104098465 | 0 | N.A. | 0 |
| TMEM102     | 0,089028551 | 0,035358284  | 0 | N.A. | 0 |

|             |             |              |   |      |   |
|-------------|-------------|--------------|---|------|---|
| SLC25A45    | 0,089013399 | 0,307488062  | 0 | N.A. | 0 |
| RP11-456H18 | 0,089003947 |              | 0 | N.A. | 0 |
| HIST1H4J    | 0,089002825 | 0,036672908  | 0 | N.A. | 0 |
| RP11-398H6. | 0,088994362 | 0,044665184  | 0 | N.A. | 0 |
| SLC16A2     | 0,088989724 | 0,082492167  | 0 | N.A. | 0 |
| FBXO3       | 0,088977043 | 0,241377787  | 0 | N.A. | 0 |
| ECSCR       | 0,088954393 | -0,288492126 | 0 | N.A. | 0 |
| RHBDD2      | 0,088951271 | 0,42630429   | 0 | N.A. | 0 |
| RP4-794H19. | 0,088941838 | 0,231154443  | 0 | N.A. | 0 |
| PPP1R3D     | 0,088908303 | 0,202205844  | 0 | N.A. | 0 |
| SIN3B       | 0,088897233 | 0,127841982  | 0 | N.A. | 0 |
| RP11-1000B6 | 0,088866006 |              | 0 | N.A. | 0 |
| RP11-105N13 | 0,08885184  | -0,066011203 | 0 | N.A. | 0 |
| GHET1       | 0,088831991 | -0,027739004 | 0 | N.A. | 0 |
| EFHC1       | 0,088819883 | 0,316296376  | 0 | N.A. | 0 |
| RP11-480C16 | 0,088810376 | -0,012294932 | 0 | N.A. | 0 |
| DEDD        | 0,088692136 | 0,079650793  | 0 | N.A. | 0 |
| MUM1        | 0,088690015 | 0,175234838  | 0 | N.A. | 0 |
| SSPN        | 0,08868403  | -0,031419176 | 0 | N.A. | 0 |
| AKT1        | 0,088676467 | 0,084205075  | 0 | N.A. | 0 |
| ZBTB17      | 0,088602199 | 0,317538908  | 0 | N.A. | 0 |
| CNNM1       | 0,088601726 |              | 0 | N.A. | 0 |
| FAM193A     | 0,088601654 | 0,203367393  | 0 | N.A. | 0 |
| AC074117.10 | 0,088599194 | 0,154739032  | 0 | N.A. | 0 |
| RP11-303E16 | 0,088447703 | 0,099307093  | 0 | N.A. | 0 |
| LINC00562   | 0,088325191 | 0,023833766  | 0 | N.A. | 0 |
| BAIAP3      | 0,088256585 | 0,100371118  | 0 | N.A. | 0 |
| RP4-809F18. | 0,088190748 |              | 0 | N.A. | 0 |
| AC083843.2  | 0,088141624 | 0,081092198  | 0 | N.A. | 0 |
| ZNF585A     | 0,088133176 | 0,052110376  | 0 | N.A. | 0 |
| RP13-726E6. | 0,088056167 |              | 0 | N.A. | 0 |
| HEXIM1      | 0,08804971  | 0,314326913  | 0 | N.A. | 0 |
| AC007182.6  | 0,088038401 | 0,05803202   | 0 | N.A. | 0 |

|             |             |              |   |      |   |
|-------------|-------------|--------------|---|------|---|
| ELMO3       | 0,087990285 | 0,368942283  | 0 | N.A. | 0 |
| PKIA        | 0,087981869 | 0,306456693  | 0 | N.A. | 0 |
| AC004076.7  | 0,087940914 |              | 0 | N.A. | 0 |
| AC074212.6  | 0,087924297 | -0,071509212 | 0 | N.A. | 0 |
| RNASEK      | 0,087911407 | 0,112694045  | 0 | N.A. | 0 |
| STAB1       | 0,087910502 | -0,104537075 | 0 | N.A. | 0 |
| RP13-317D1  | 0,087873357 | -0,257883807 | 0 | N.A. | 0 |
| RP11-574K1  | 0,08784388  | 0,047572172  | 0 | N.A. | 0 |
| TP53I3      | 0,087838846 | 0,489616165  | 0 | N.A. | 0 |
| EHD3        | 0,087834006 |              | 0 | N.A. | 0 |
| PAEP        | 0,08782431  | 0,266155687  | 1 | cls4 | 0 |
| IGKC        | 0,087756727 | -0,229284947 | 0 | N.A. | 0 |
| RP4-718J7.4 | 0,087683166 | 0,335806186  | 0 | N.A. | 0 |
| ZNF821      | 0,087642118 | 0,241980927  | 0 | N.A. | 0 |
| SWT1        | 0,087633672 | 0,28331828   | 0 | N.A. | 0 |
| CD27        | 0,087617158 | -0,331685637 | 0 | N.A. | 0 |
| PDLIM3      | 0,087607511 | -0,211126415 | 0 | N.A. | 0 |
| CELSR2      | 0,087607051 | 0,520955162  | 0 | N.A. | 0 |
| KCNIP4      | 0,087605333 | 0,055128546  | 0 | N.A. | 0 |
| ATG2B       | 0,087599586 | 0,039155076  | 0 | N.A. | 0 |
| CTD-2541M1  | 0,087545645 | 0,023444472  | 0 | N.A. | 0 |
| ABCB9       | 0,087538216 | -0,070573641 | 0 | N.A. | 0 |
| PPP6R2      | 0,087520376 | 0,315861931  | 0 | N.A. | 0 |
| NAPB        | 0,087517745 | 0,239089134  | 0 | N.A. | 0 |
| RALGAPA1    | 0,087497526 | 0,214652851  | 0 | N.A. | 0 |
| RNASE4      | 0,087486524 | 0,240299846  | 0 | N.A. | 0 |
| ZNF17       | 0,087349027 | -0,153636912 | 0 | N.A. | 0 |
| KCNJ2-AS1   | 0,087301841 | 0,058749871  | 0 | N.A. | 0 |
| MFNG        | 0,08729431  | -0,02713245  | 0 | N.A. | 0 |
| CTC-428G20. | 0,087256767 | 0,009285644  | 0 | N.A. | 0 |
| RP11-793H1  | 0,087227167 | -0,044359349 | 0 | N.A. | 0 |
| JKAMP       | 0,087224189 | 0,310026064  | 0 | N.A. | 0 |
| APOC4-APOC  | 0,087210391 |              | 0 | N.A. | 0 |



|             |             |              |   |      |   |
|-------------|-------------|--------------|---|------|---|
| LRRC37A     | 0,087114111 | 0,176832752  | 0 | N.A. | 0 |
| RIPK3       | 0,087109221 | 0,071925527  | 0 | N.A. | 0 |
| RP11-43F13. | 0,087075087 |              | 0 | N.A. | 0 |
| RP11-77H9.6 | 0,087069017 | 0,17837461   | 0 | N.A. | 0 |
| GPR146      | 0,087032524 | -0,138177156 | 0 | N.A. | 0 |
| CNPPD1      | 0,087031509 | 0,402370189  | 0 | N.A. | 0 |
| DCTN1       | 0,087023301 | 0,243200971  | 0 | N.A. | 0 |
| MDGA1       | 0,086992922 |              | 0 | N.A. | 0 |
| PCP2        | 0,086856177 | 0,173254234  | 0 | N.A. | 0 |
| ZNF18       | 0,086800946 | 0,054377916  | 0 | N.A. | 0 |
| FBXO28      | 0,08676413  | 0,259105126  | 0 | N.A. | 0 |
| FLJ31104    | 0,086742888 | 0,089641957  | 0 | N.A. | 0 |
| ANKLE1      | 0,086712962 | -0,099094523 | 0 | N.A. | 0 |
| RP11-996F15 | 0,086694627 | -0,159945608 | 0 | N.A. | 0 |
| CTD-2308N2  | 0,086605418 |              | 0 | N.A. | 0 |
| LUM         | 0,086602789 | -0,057157046 | 0 | N.A. | 0 |
| TRIM7       | 0,086576763 | 0,20168667   | 0 | N.A. | 0 |
| AC073283.7  | 0,086412135 | 0,030190843  | 0 | N.A. | 0 |
| FAM229A     | 0,086404603 | 0,087221858  | 0 | N.A. | 0 |
| BCL2L11     | 0,086342823 | 0,056426942  | 0 | N.A. | 0 |
| KLF8        | 0,086337415 | 0,192542596  | 0 | N.A. | 0 |
| XXbac-BPGBF | 0,086330619 | 0,243403246  | 0 | N.A. | 0 |
| CYP4F2      | 0,086310821 | 0,052404517  | 0 | N.A. | 0 |
| NAGS        | 0,086306243 | 0,046984453  | 0 | N.A. | 0 |
| TK2         | 0,086295457 | 0,004985084  | 0 | N.A. | 0 |
| SOSTDC1     | 0,086254077 | -0,152449679 | 0 | N.A. | 0 |
| RP11-278C7. | 0,086246797 | -0,134214434 | 0 | N.A. | 0 |
| ZNF8        | 0,086229024 | 0,096768225  | 0 | N.A. | 0 |
| SHANK2-AS3  | 0,086223626 |              | 0 | N.A. | 0 |
| AP006748.1  | 0,086222388 | 0,092188858  | 0 | N.A. | 0 |
| ITGA1       | 0,086219375 | 0,201001707  | 0 | N.A. | 0 |
| KRT36       | 0,086213169 | -0,271760522 | 0 | N.A. | 0 |
| TBC1D14     | 0,086150678 | -0,031861891 | 0 | N.A. | 0 |

|             |             |              |   |      |   |
|-------------|-------------|--------------|---|------|---|
| RP11-575F12 | 0,086150248 | -0,141017923 | 0 | N.A. | 0 |
| TUBB3       | 0,08614024  | 0,402414906  | 0 | N.A. | 0 |
| PAOX        | 0,08610199  | 0,259974732  | 0 | N.A. | 0 |
| CTC-487M23  | 0,08608258  | 0,231171092  | 0 | N.A. | 0 |
| RNF216      | 0,086080626 | 0,202057175  | 0 | N.A. | 0 |
| RP11-1094H2 | 0,086073739 | 0,172148608  | 0 | N.A. | 0 |
| ZNF311      | 0,086072881 | 0,01032232   | 0 | N.A. | 0 |
| CTD-2540B15 | 0,086061359 |              | 0 | N.A. | 0 |
| ASH1L       | 0,086043946 | 0,345666657  | 0 | N.A. | 0 |
| RNASEH2B-A  | 0,08602207  | -0,376666657 | 0 | N.A. | 0 |
| HECTD2      | 0,085981912 | -0,061618154 | 0 | N.A. | 0 |
| GJC1        | 0,085981784 |              | 0 | N.A. | 0 |
| SCGB2A1     | 0,085964721 | 0,133748097  | 0 | N.A. | 0 |
| RP11-325L7. | 0,085933292 | 0,114254319  | 0 | N.A. | 0 |
| TOP3B       | 0,085931288 | 0,135340296  | 0 | N.A. | 0 |
| TM4SF18     | 0,08588832  | -0,216322752 | 0 | N.A. | 0 |
| ICOSLG      | 0,085888253 | 0,015435786  | 0 | N.A. | 0 |
| SLC26A4     | 0,085879933 | -0,088653378 | 0 | N.A. | 0 |
| ALPK2       | 0,085874158 | 0,086666922  | 0 | N.A. | 0 |
| CTD-2249K22 | 0,085872467 | 0,192819235  | 0 | N.A. | 0 |
| PGBD4       | 0,085862485 | -0,114643385 | 0 | N.A. | 0 |
| C10orf11    | 0,085833499 | -0,074580671 | 0 | N.A. | 0 |
| ZMAT1       | 0,085832746 | 0,128903924  | 0 | N.A. | 0 |
| RP11-53019. | 0,085815343 | 0,224544324  | 0 | N.A. | 0 |
| AC005534.8  | 0,085811837 |              | 0 | N.A. | 0 |
| CYGB        | 0,085784092 | 0,171875059  | 0 | N.A. | 0 |
| RP4-583P15. | 0,085724312 | 0,102780014  | 0 | N.A. | 0 |
| RP11-136L23 | 0,085649847 | 0,018393901  | 0 | N.A. | 0 |
| SGK494      | 0,085628542 | -0,133739965 | 0 | N.A. | 0 |
| HUS1B       | 0,085623133 | 0,021619     | 0 | N.A. | 0 |
| NTN1        | 0,085611912 | 0,073406207  | 0 | N.A. | 0 |
| IGKV3-15    | 0,085591888 | -0,253438035 | 0 | N.A. | 0 |
| SERTAD3     | 0,085580349 | 0,14383737   | 0 | N.A. | 0 |

|             |             |              |   |      |   |
|-------------|-------------|--------------|---|------|---|
| RP11-21L23. | 0,085548137 | -0,009004897 | 0 | N.A. | 0 |
| RP11-677M1  | 0,085437124 | 0,056646305  | 0 | N.A. | 0 |
| IGKV1D-17   | 0,085433589 |              | 0 | N.A. | 0 |
| MR1         | 0,085410867 | 0,027741278  | 0 | N.A. | 0 |
| RP11-483I13 | 0,085360892 | -0,218615962 | 0 | N.A. | 0 |
| AC092171.4  | 0,085357725 |              | 0 | N.A. | 0 |
| HNF4G       | 0,085347578 | 0,484226872  | 0 | N.A. | 0 |
| LINC00649   | 0,085312429 | -0,019115412 | 0 | N.A. | 0 |
| SEMA3A      | 0,085263306 | -0,018861888 | 0 | N.A. | 0 |
| ADAP2       | 0,085172092 | 0,216119897  | 0 | N.A. | 0 |
| RP4-612B15. | 0,085157987 | -0,146381739 | 0 | N.A. | 0 |
| ADRBK2      | 0,085139226 | 0,009532343  | 0 | N.A. | 0 |
| RP11-656D10 | 0,085132586 | 0,00946484   | 0 | N.A. | 0 |
| GOLGA6L2    | 0,085131092 |              | 0 | N.A. | 0 |
| DAP         | 0,08512551  | 0,196880124  | 0 | N.A. | 0 |
| ABLIM2      | 0,08511824  | 0,100625555  | 0 | N.A. | 0 |
| RP11-472M1  | 0,085109535 | 0,232150643  | 0 | N.A. | 0 |
| CCDC88A     | 0,085063212 | -0,236470151 | 0 | N.A. | 0 |
| ASCC1       | 0,085053679 | 0,144748572  | 0 | N.A. | 0 |
| AC009501.4  | 0,085031017 | -0,015543179 | 0 | N.A. | 0 |
| ZNF761      | 0,084910588 | 0,117808252  | 0 | N.A. | 0 |
| SLC44A1     | 0,084894422 | 0,340949623  | 0 | N.A. | 0 |
| MIOX        | 0,084872061 | -0,003754033 | 0 | N.A. | 0 |
| CENPT       | 0,084862135 | -0,063495482 | 0 | N.A. | 0 |
| RAF1        | 0,084836914 | -0,193799463 | 0 | N.A. | 0 |
| FAM69A      | 0,084816413 | 0,02500404   | 0 | N.A. | 0 |
| CTC-236F12. | 0,08475431  | 0,04208877   | 0 | N.A. | 0 |
| ABHD12      | 0,084739414 | 0,374167363  | 0 | N.A. | 0 |
| RP11-129M1  | 0,084730579 | -0,0239405   | 0 | N.A. | 0 |
| CDKL4       | 0,084659403 | 0,094095731  | 0 | N.A. | 0 |
| TRIM36      | 0,084648403 | -0,208283371 | 0 | N.A. | 0 |
| C5AR1       | 0,084611032 | 0,129341679  | 0 | N.A. | 0 |
| TSPAN5      | 0,084533283 | 0,171629463  | 0 | N.A. | 0 |

|               |                    |                    |          |            |   |
|---------------|--------------------|--------------------|----------|------------|---|
| LCA5L         | 0,084494466        | -0,242515056       | 0        | N.A.       | 0 |
| ASMTL-AS1     | 0,084480805        | -0,108988347       | 0        | N.A.       | 0 |
| PPAPDC1B      | 0,084472333        | 0,312652617        | 0        | N.A.       | 0 |
| RP1-224A6.3   | 0,084446952        | -0,006310575       | 0        | N.A.       | 0 |
| KLHL36        | 0,084406599        | -0,001305725       | 0        | N.A.       | 0 |
| DSG2-AS1      | 0,084382           |                    | 0        | N.A.       | 0 |
| CYBB          | 0,084349576        | 0,105690331        | 0        | N.A.       | 0 |
| RP11-254F7.   | 0,08433119         |                    | 0        | N.A.       | 0 |
| KDM3B         | 0,084280157        | 0,203477206        | 0        | N.A.       | 0 |
| LHFPL4        | 0,084230916        | 0,072007702        | 0        | N.A.       | 0 |
| SLC35D1       | 0,084212503        | 0,247883691        | 0        | N.A.       | 0 |
| KLHDC1        | 0,084211273        | -0,201751219       | 0        | N.A.       | 0 |
| FAM220A       | 0,084158607        | 0,183299842        | 0        | N.A.       | 0 |
| TSNARE1       | 0,084156357        | 0,081487051        | 0        | N.A.       | 0 |
| AAED1         | 0,084154094        | -0,282381533       | 0        | N.A.       | 0 |
| TMEM135       | 0,0841447          | -0,011560341       | 0        | N.A.       | 0 |
| PEX14         | 0,084111333        | 0,07545512         | 0        | N.A.       | 0 |
| AC009948.5    | 0,084072652        | 0,053585046        | 0        | N.A.       | 0 |
| LINC00937     | 0,084051596        | 0,173980479        | 0        | N.A.       | 0 |
| RP11-804H8.   | 0,084040697        | 0,111115967        | 0        | N.A.       | 0 |
| USP36         | 0,084024499        | 0,144257629        | 0        | N.A.       | 0 |
| AF165138.7    | 0,084024011        |                    | 0        | N.A.       | 0 |
| ZNF468        | 0,083964865        | -0,126790773       | 0        | N.A.       | 0 |
| FRMPD3        | 0,083927411        | 0,131816706        | 0        | N.A.       | 0 |
| CBLL1         | 0,083925012        | -0,129087686       | 0        | N.A.       | 0 |
| CYP4F8        | 0,083897181        | 0,024369932        | 0        | N.A.       | 0 |
| SGK3          | 0,083876006        | 0,095892118        | 0        | N.A.       | 0 |
| <b>FBXL14</b> | <b>0,083718272</b> | <b>0,001588989</b> | <b>1</b> | <b>cl1</b> | 0 |
| EFNA2         | 0,083693679        | 0,069418558        | 0        | N.A.       | 0 |
| SGSM2         | 0,083623186        | 0,460727056        | 0        | N.A.       | 0 |
| RP11-498C9.   | 0,083587786        | 0,003977519        | 0        | N.A.       | 0 |
| RP11-167N5.   | 0,083555499        |                    | 0        | N.A.       | 0 |
| FAM46C        | 0,083543969        | -0,272383098       | 0        | N.A.       | 0 |

|              |             |              |   |      |   |
|--------------|-------------|--------------|---|------|---|
| ARG1         | 0,083532897 |              | 0 | N.A. | 0 |
| SMIM24       | 0,083386457 | 0,107022808  | 0 | N.A. | 0 |
| LRP5L        | 0,083369437 | -0,012519727 | 0 | N.A. | 0 |
| KAT6B        | 0,08335566  | 0,192951058  | 0 | N.A. | 0 |
| MT1F         | 0,083313479 | 0,033114832  | 0 | N.A. | 0 |
| EPHA1        | 0,083284288 | 0,095800413  | 0 | N.A. | 0 |
| NPHS1        | 0,083279395 | -0,14373812  | 0 | N.A. | 0 |
| MTMR12       | 0,08326004  | 0,066473341  | 0 | N.A. | 0 |
| FCN1         | 0,083225887 |              | 0 | N.A. | 0 |
| KIAA0907     | 0,083052224 | 0,380054763  | 0 | N.A. | 0 |
| ZMIZ2        | 0,083047965 | 0,191170118  | 0 | N.A. | 0 |
| CTD-2540F13  | 0,083004825 | -0,01946257  | 0 | N.A. | 0 |
| SLC37A2      | 0,082994551 | 0,210026679  | 0 | N.A. | 0 |
| RP11-770J1.5 | 0,082951694 | -0,052423544 | 0 | N.A. | 0 |
| THAP9        | 0,08291929  | -0,05609181  | 0 | N.A. | 0 |
| PRMT9        | 0,082883427 | 0,162952192  | 0 | N.A. | 0 |
| GZMH         | 0,08286067  | 0,238289351  | 0 | N.A. | 0 |
| RP11-763B22  | 0,082826754 | -0,012677131 | 0 | N.A. | 0 |
| RP5-1063M2   | 0,082821785 | -0,062145088 | 0 | N.A. | 0 |
| SPICE1       | 0,082804187 | 0,106427949  | 0 | N.A. | 0 |
| C10orf107    | 0,082774979 | -0,112121688 | 0 | N.A. | 0 |
| ERV3-1       | 0,08277181  | 0,06979752   | 0 | N.A. | 0 |
| ACCS         | 0,082767138 | -0,028692557 | 0 | N.A. | 0 |
| SUMO4        | 0,082753056 | 0,315016032  | 0 | N.A. | 0 |
| APOBEC3G     | 0,082751446 | -0,21829735  | 0 | N.A. | 0 |
| F8A3         | 0,082741911 | -0,204794572 | 0 | N.A. | 0 |
| ME1          | 0,08271852  | 0,205012172  | 0 | N.A. | 0 |
| CTC-241N9.1  | 0,082629358 | -0,066555697 | 0 | N.A. | 0 |
| PIGR         | 0,082615021 | 0,243199195  | 0 | N.A. | 0 |
| MECOM        | 0,082604036 | 0,163910319  | 0 | N.A. | 0 |
| ARID2        | 0,082594565 | 0,30538808   | 0 | N.A. | 0 |
| ZNF883       | 0,082578153 |              | 0 | N.A. | 0 |
| EIF3C        | 0,082544808 | 0,040330485  | 0 | N.A. | 0 |

|             |             |              |   |      |   |
|-------------|-------------|--------------|---|------|---|
| C1orf229    | 0,082499952 | 0,160826467  | 0 | N.A. | 0 |
| RP4-539M6.2 | 0,082451728 |              | 0 | N.A. | 0 |
| TRPM4       | 0,082442907 | 0,382177206  | 0 | N.A. | 0 |
| CCDC24      | 0,082433278 | 0,062466859  | 0 | N.A. | 0 |
| MAMLD1      | 0,082382315 | 0,175462831  | 0 | N.A. | 0 |
| TMPPE       | 0,082368584 | -0,083765037 | 0 | N.A. | 0 |
| SULF1       | 0,082303875 | -0,327320886 | 0 | N.A. | 0 |
| UBAP2       | 0,082292251 | -0,005297463 | 0 | N.A. | 0 |
| NUMBL       | 0,082274583 | 0,329379861  | 0 | N.A. | 0 |
| GREM1       | 0,082254642 | 0,183140084  | 0 | N.A. | 0 |
| FBXL19      | 0,082232467 | 0,073091796  | 0 | N.A. | 0 |
| PRRC2B      | 0,082231242 | 0,300920472  | 0 | N.A. | 0 |
| XXbac-BPG15 | 0,082204262 |              | 0 | N.A. | 0 |
| BRWD1-AS2   | 0,082084373 | 0,073023609  | 0 | N.A. | 0 |
| MAP3K14     | 0,082072135 | 0,177662745  | 0 | N.A. | 0 |
| AL354822.1  | 0,082066929 | -0,198109187 | 0 | N.A. | 0 |
| CTD-2310F14 | 0,08205474  |              | 0 | N.A. | 0 |
| EN1         | 0,082039852 | -0,082610553 | 0 | N.A. | 0 |
| FAM171B     | 0,082038828 | 0,081015879  | 0 | N.A. | 0 |
| NEO1        | 0,082030486 | 0,166005146  | 0 | N.A. | 0 |
| AREL1       | 0,081975973 | 0,235999148  | 0 | N.A. | 0 |
| HMCN1       | 0,081937504 |              | 0 | N.A. | 0 |
| MTMR1       | 0,081926806 | -0,127240135 | 0 | N.A. | 0 |
| LIPA        | 0,081888052 | 0,040125526  | 0 | N.A. | 0 |
| CTD-2288F12 | 0,081883644 | -0,102240773 | 0 | N.A. | 0 |
| CTB-1144G6. | 0,081758068 | 0,035879194  | 0 | N.A. | 0 |
| LYSMD4      | 0,081756669 | 0,040638406  | 0 | N.A. | 0 |
| C19orf67    | 0,081695336 |              | 0 | N.A. | 0 |
| ACKR1       | 0,081695225 | -0,206125357 | 0 | N.A. | 0 |
| DMTF1       | 0,0816769   | -0,094993257 | 0 | N.A. | 0 |
| TECPR2      | 0,081674763 | -0,018300775 | 0 | N.A. | 0 |
| CEMP1       | 0,081620651 |              | 0 | N.A. | 0 |
| RIC3        | 0,08161786  |              | 0 | N.A. | 0 |

|              |             |              |   |      |   |
|--------------|-------------|--------------|---|------|---|
| ZNF529-AS1   | 0,081607131 | -0,39361017  | 0 | N.A. | 0 |
| LPL          | 0,081604933 | -0,149616931 | 0 | N.A. | 0 |
| SENP1        | 0,081586715 | -0,207341495 | 0 | N.A. | 0 |
| TNFRSF10A    | 0,081582017 | 0,363210452  | 0 | N.A. | 0 |
| ARHGDIG      | 0,08153265  | -0,08797508  | 0 | N.A. | 0 |
| FLVCR2       | 0,081472326 | 0,070996339  | 0 | N.A. | 0 |
| RP11-256P1.  | 0,081462965 |              | 0 | N.A. | 0 |
| SEPT5        | 0,081460591 | -0,107859976 | 0 | N.A. | 0 |
| KLHL34       | 0,081458891 | 0,213184417  | 0 | N.A. | 0 |
| TGFBR3L      | 0,081422848 | -0,323679882 | 0 | N.A. | 0 |
| PBX1         | 0,081281591 | -0,075112481 | 0 | N.A. | 0 |
| RP4-758J18.1 | 0,081270279 | 0,332584038  | 0 | N.A. | 0 |
| ITFG3        | 0,08124436  | 0,45074135   | 0 | N.A. | 0 |
| ABHD5        | 0,081238799 | -0,093997384 | 0 | N.A. | 0 |
| BTN3A2       | 0,081235579 | -0,153423285 | 0 | N.A. | 0 |
| RAC2         | 0,081228784 | -0,253415883 | 0 | N.A. | 0 |
| RP11-171I2.2 | 0,081206207 | 0,069089612  | 0 | N.A. | 0 |
| C2CD2L       | 0,081202099 | 0,171594142  | 0 | N.A. | 0 |
| LONRF3       | 0,081194017 | 0,227781061  | 0 | N.A. | 0 |
| AC002306.1   | 0,081161142 |              | 0 | N.A. | 0 |
| ABCB4        | 0,081158071 | 0,294155694  | 0 | N.A. | 0 |
| NPPA-AS1     | 0,081151794 | 0,055071606  | 0 | N.A. | 0 |
| FCER2        | 0,081143534 |              | 0 | N.A. | 0 |
| UHRF1BP1     | 0,081142814 | 0,155080159  | 0 | N.A. | 0 |
| SLC13A4      | 0,081131128 |              | 0 | N.A. | 0 |
| NDOR1        | 0,081083192 | 0,047096268  | 0 | N.A. | 0 |
| RP11-483L5.1 | 0,081071705 |              | 0 | N.A. | 0 |
| C5orf22      | 0,081044158 | 0,227907815  | 0 | N.A. | 0 |
| LYSMD1       | 0,080988002 | 0,208506463  | 0 | N.A. | 0 |
| CYP1B1       | 0,080963763 | 0,003315409  | 0 | N.A. | 0 |
| RP11-488L18  | 0,080923393 | 0,205871955  | 0 | N.A. | 0 |
| LCA5         | 0,080917292 | 0,272121214  | 0 | N.A. | 0 |
| RP11-3D4.2   | 0,080890265 |              | 0 | N.A. | 0 |

|               |                    |                    |          |            |   |
|---------------|--------------------|--------------------|----------|------------|---|
| RP11-131L12   | 0,080877937        |                    | 0        | N.A.       | 0 |
| RP11-499P20   | 0,08082403         | -0,046437056       | 0        | N.A.       | 0 |
| USP18         | 0,080735918        | 0,356693183        | 0        | N.A.       | 0 |
| <b>RASAL1</b> | <b>0,080721278</b> | <b>0,143401361</b> | <b>1</b> | <b>cl1</b> | 0 |
| F2R           | 0,080661094        | 0,097888135        | 0        | N.A.       | 0 |
| RP3-412A9.1   | 0,080653041        | -0,163487585       | 0        | N.A.       | 0 |
| DNAH9         | 0,080633039        | 0,135660183        | 0        | N.A.       | 0 |
| BTN3A3        | 0,080606381        | 0,313744043        | 0        | N.A.       | 0 |
| C5orf46       | 0,080521202        | 0,125606625        | 0        | N.A.       | 0 |
| FLYWCH1       | 0,080506516        | 0,163976108        | 0        | N.A.       | 0 |
| IGHV3-15      | 0,080480091        | -0,267392012       | 0        | N.A.       | 0 |
| BLK           | 0,080474045        | 0,084516815        | 0        | N.A.       | 0 |
| ACRV1         | 0,080441942        |                    | 0        | N.A.       | 0 |
| RGPD8         | 0,080418658        | 0,179519812        | 0        | N.A.       | 0 |
| RP11-434H6.   | 0,080388738        | -0,209143272       | 0        | N.A.       | 0 |
| SIGLEC7       | 0,080384985        |                    | 0        | N.A.       | 0 |
| ANK3          | 0,080369998        | 0,036225686        | 0        | N.A.       | 0 |
| RP3-406A7.7   | 0,080369437        | -0,243747016       | 0        | N.A.       | 0 |
| LMCD1         | 0,080340008        | -0,233135213       | 0        | N.A.       | 0 |
| MAN2B1        | 0,080326018        | 0,104628161        | 0        | N.A.       | 0 |
| LINC00958     | 0,080285185        | 0,047323845        | 0        | N.A.       | 0 |
| LA16c-380H5   | 0,080282931        | 0,240897385        | 0        | N.A.       | 0 |
| ARHGAP39      | 0,08027672         | 0,013449849        | 0        | N.A.       | 0 |
| MBNL1-AS1     | 0,080256932        | -0,140769172       | 0        | N.A.       | 0 |
| RP11-240G2    | 0,08018012         | 0,082587823        | 0        | N.A.       | 0 |
| IL23R         | 0,080153267        | -0,059431967       | 0        | N.A.       | 0 |
| PNPLA7        | 0,080145225        | 0,359645891        | 0        | N.A.       | 0 |
| PPIP5K1       | 0,08014298         | 0,077906275        | 0        | N.A.       | 0 |
| RP11-426L16   | 0,08011092         | -0,025234084       | 0        | N.A.       | 0 |
| PRMT5-AS1     | 0,080043387        | -0,047435869       | 0        | N.A.       | 0 |
| AKNA          | 0,080030549        | -0,251717732       | 0        | N.A.       | 0 |
| AC104534.2    | 0,079992273        | 0,258798933        | 0        | N.A.       | 0 |
| RP11-473M2    | 0,079947249        | 0,037963205        | 0        | N.A.       | 0 |



|                |             |              |   |      |   |
|----------------|-------------|--------------|---|------|---|
| LINC01426      | 0,0799203   | -0,239379181 | 0 | N.A. | 0 |
| SPAG8          | 0,079869739 | 0,303081599  | 0 | N.A. | 0 |
| SMARCA5-AS1    | 0,07986238  | -0,150224493 | 0 | N.A. | 0 |
| RP11-87C12.1   | 0,079838163 |              | 0 | N.A. | 0 |
| RP11-286N2.1   | 0,079816457 | 0,11770957   | 0 | N.A. | 0 |
| GPR17          | 0,079767536 | -0,007468906 | 0 | N.A. | 0 |
| ATP6AP1L       | 0,079747006 | 0,314303695  | 0 | N.A. | 0 |
| RASL10A        | 0,07969214  | 0,062645199  | 0 | N.A. | 0 |
| IL34           | 0,07961424  | -0,002938884 | 0 | N.A. | 0 |
| RTEL1-TNFRSF25 | 0,079566191 | 0,092807145  | 0 | N.A. | 0 |
| NLRC3          | 0,079557627 | 0,110160615  | 0 | N.A. | 0 |
| ZNF461         | 0,079554272 | -0,074648563 | 0 | N.A. | 0 |
| KIAA1211L      | 0,079515954 | 0,279016142  | 0 | N.A. | 0 |
| ZC3H7B         | 0,079507526 | 0,021041982  | 0 | N.A. | 0 |
| HCST           | 0,079494257 | -0,101106529 | 0 | N.A. | 0 |
| GLTP           | 0,079443889 | 0,223697557  | 0 | N.A. | 0 |
| RP11-184I16.1  | 0,079435884 |              | 0 | N.A. | 0 |
| ZNF518B        | 0,079346612 | 0,115653208  | 0 | N.A. | 0 |
| PWAR6          | 0,079336503 | -0,105271171 | 0 | N.A. | 0 |
| WDR59          | 0,079313791 | 0,193661056  | 0 | N.A. | 0 |
| PDZD2          | 0,079257882 |              | 0 | N.A. | 0 |
| WIP1           | 0,079190747 | -0,055035504 | 0 | N.A. | 0 |
| APOBEC3F       | 0,079172938 | 0,184929415  | 0 | N.A. | 0 |
| SLC6A6         | 0,079165856 | 0,125947793  | 0 | N.A. | 0 |
| RP11-776H1.1   | 0,079140021 | 0,274507336  | 0 | N.A. | 0 |
| TRIM5          | 0,079099491 | -0,125444921 | 0 | N.A. | 0 |
| RP11-431K24.1  | 0,079075259 | 0,187324456  | 0 | N.A. | 0 |
| ALAD           | 0,079067063 | 0,357224843  | 0 | N.A. | 0 |
| C15orf65       | 0,079042941 | -0,067272168 | 0 | N.A. | 0 |
| DNAJC24        | 0,079026276 | 0,060380866  | 0 | N.A. | 0 |
| RP11-244H3.1   | 0,07901968  | 0,035147225  | 0 | N.A. | 0 |
| SPCS3          | 0,07900911  | 0,053075732  | 0 | N.A. | 0 |
| ZNF646         | 0,07900832  | -0,034932928 | 0 | N.A. | 0 |

|              |             |              |   |      |   |
|--------------|-------------|--------------|---|------|---|
| CFAP54       | 0,078961499 | 0,105393635  | 0 | N.A. | 0 |
| EXOC3        | 0,078961032 | 0,389950413  | 0 | N.A. | 0 |
| IGHV3-23     | 0,078906474 | -0,209145521 | 0 | N.A. | 0 |
| ABCA9-AS1    | 0,078902529 | 0,121360167  | 0 | N.A. | 0 |
| CCL4         | 0,078900096 | 0,0273175    | 0 | N.A. | 0 |
| PHKB         | 0,078739285 | 0,3512254    | 0 | N.A. | 0 |
| RAB40AL      | 0,078680042 | -0,153867779 | 0 | N.A. | 0 |
| CTD-2033C1   | 0,078653482 | 0,059109505  | 0 | N.A. | 0 |
| RP11-626G1   | 0,078645818 | 0,075400901  | 0 | N.A. | 0 |
| FAM177B      | 0,078618962 | -0,051121598 | 0 | N.A. | 0 |
| RP11-386I8.6 | 0,078589779 |              | 0 | N.A. | 0 |
| SLC25A43     | 0,078581189 | 0,138193889  | 0 | N.A. | 0 |
| PURB         | 0,078571089 | 0,030100197  | 0 | N.A. | 0 |
| H3F3B        | 0,078570808 | 0,128408181  | 0 | N.A. | 0 |
| CEBPA        | 0,078553147 | 0,142383672  | 0 | N.A. | 0 |
| SLC25A44     | 0,078402303 | -0,19012057  | 0 | N.A. | 0 |
| FOXD3-AS1    | 0,078400133 | -0,037349203 | 0 | N.A. | 0 |
| NAIP         | 0,078397068 | -0,160691354 | 0 | N.A. | 0 |
| CD9          | 0,078382981 | 0,438280124  | 0 | N.A. | 0 |
| OPA3         | 0,078322245 | 0,109036065  | 0 | N.A. | 0 |
| RP3-388N13   | 0,078265549 |              | 0 | N.A. | 0 |
| AC006277.2   | 0,078214747 | -0,071428842 | 0 | N.A. | 0 |
| IRF5         | 0,078189612 | -0,086339485 | 0 | N.A. | 0 |
| RP11-107N1   | 0,078179036 | -0,027293944 | 0 | N.A. | 0 |
| LRRC37A3     | 0,078175306 | -0,166305245 | 0 | N.A. | 0 |
| TMEM132B     | 0,07814432  | 0,190835136  | 0 | N.A. | 0 |
| CFAP74       | 0,078066652 | -0,075673826 | 0 | N.A. | 0 |
| CLC          | 0,078042343 | -0,256404596 | 0 | N.A. | 0 |
| LINC00694    | 0,07803847  |              | 0 | N.A. | 0 |
| AC007620.3   | 0,078013557 | 0,059084412  | 0 | N.A. | 0 |
| RP11-505K9   | 0,078011698 |              | 0 | N.A. | 0 |
| ERBB4        | 0,078006141 |              | 0 | N.A. | 0 |
| BMI1         | 0,077935375 | -0,229887596 | 0 | N.A. | 0 |

|             |             |              |   |      |   |
|-------------|-------------|--------------|---|------|---|
| LAT2        | 0,077933173 | -0,100121264 | 0 | N.A. | 0 |
| ZNF488      | 0,077916803 | 0,300551948  | 0 | N.A. | 0 |
| CDC42EP4    | 0,077913645 | 0,146890792  | 0 | N.A. | 0 |
| TMEM187     | 0,077904618 | 0,20226239   | 0 | N.A. | 0 |
| DAB1        | 0,077887743 | -0,05771186  | 0 | N.A. | 0 |
| USP8        | 0,077814578 | 0,310648236  | 0 | N.A. | 0 |
| RP11-45P15. | 0,077804996 | 0,006800455  | 0 | N.A. | 0 |
| CD200R1     | 0,077802843 | -0,159696913 | 0 | N.A. | 0 |
| RP11-385D13 | 0,077784181 | -0,029673612 | 0 | N.A. | 0 |
| RP11-276H7. | 0,077749853 | 0,204968422  | 0 | N.A. | 0 |
| RP11-44N21. | 0,077748072 | -0,12222089  | 0 | N.A. | 0 |
| PHF2        | 0,077684004 | 0,199113895  | 0 | N.A. | 0 |
| MYSM1       | 0,077682546 | 0,073878254  | 0 | N.A. | 0 |
| ASB12       | 0,077635282 |              | 0 | N.A. | 0 |
| PAGE5       | 0,077634423 | -0,178047786 | 0 | N.A. | 0 |
| CPLX1       | 0,077617141 | -0,135781526 | 0 | N.A. | 0 |
| KIAA1407    | 0,07760987  | 0,230604411  | 0 | N.A. | 0 |
| RNF215      | 0,077579989 | 0,281859609  | 0 | N.A. | 0 |
| PHC3        | 0,07751532  | 0,116835437  | 0 | N.A. | 0 |
| RP11-116D17 | 0,077513395 | 0,089765202  | 0 | N.A. | 0 |
| C19orf80    | 0,077467495 |              | 0 | N.A. | 0 |
| RP11-297C4. | 0,077442519 | 0,102796747  | 0 | N.A. | 0 |
| ATL2        | 0,077439385 | 0,350588413  | 0 | N.A. | 0 |
| TCEA2       | 0,077439324 | 0,233550523  | 0 | N.A. | 0 |
| RP11-407N8. | 0,077432563 |              | 0 | N.A. | 0 |
| PPFIA4      | 0,077430361 | 0,256812644  | 0 | N.A. | 0 |
| HCP5B       | 0,077382559 | 0,343198712  | 0 | N.A. | 0 |
| FAM53B      | 0,077372543 | 0,160066198  | 0 | N.A. | 0 |
| C9orf147    | 0,077372204 | 0,284735731  | 0 | N.A. | 0 |
| RHEB        | 0,077370948 | -0,074428534 | 0 | N.A. | 0 |
| NLN         | 0,077348659 | -0,09123337  | 0 | N.A. | 0 |
| NRDE2       | 0,077314132 | -0,005645325 | 0 | N.A. | 0 |
| CCM2        | 0,077276497 | 0,171380341  | 0 | N.A. | 0 |

|             |             |              |   |      |   |
|-------------|-------------|--------------|---|------|---|
| MN1         | 0,077252824 |              | 0 | N.A. | 0 |
| FABP2       | 0,077242208 | -0,172179646 | 0 | N.A. | 0 |
| RP11-434D12 | 0,077223284 |              | 0 | N.A. | 0 |
| NFATC1      | 0,077203945 | -0,116715081 | 0 | N.A. | 0 |
| HRASLS5     | 0,077186901 | -0,084860744 | 0 | N.A. | 0 |
| BAALC-AS1   | 0,077178583 | 0,100954369  | 0 | N.A. | 0 |
| MGARP       | 0,077143037 | 0,020502171  | 0 | N.A. | 0 |
| AC133785.1  | 0,077039573 | 0,324467132  | 0 | N.A. | 0 |
| MAS1        | 0,076984559 | 0,186979434  | 0 | N.A. | 0 |
| NAPEPLD     | 0,076982766 | 0,168469494  | 0 | N.A. | 0 |
| TRPC7-AS1   | 0,076919598 | -0,247219715 | 0 | N.A. | 0 |
| NUDT14      | 0,076898687 | 0,101780916  | 0 | N.A. | 0 |
| SLC46A1     | 0,076857626 | 0,000422703  | 0 | N.A. | 0 |
| VPS53       | 0,076838336 | 0,20256546   | 0 | N.A. | 0 |
| CYP17A1-AS1 | 0,076833286 | 0,22907883   | 0 | N.A. | 0 |
| ERO1LB      | 0,076814414 | -0,107727916 | 0 | N.A. | 0 |
| RNF183      | 0,076792305 | 0,346959204  | 0 | N.A. | 0 |
| ZNF570      | 0,076730278 | 0,240316701  | 0 | N.A. | 0 |
| SEC22B      | 0,07671193  | 0,033053106  | 0 | N.A. | 0 |
| ITPKB       | 0,076710433 | -0,009932543 | 0 | N.A. | 0 |
| BET1        | 0,076641397 | 0,043251009  | 0 | N.A. | 0 |
| COPZ2       | 0,076589745 | 0,079958285  | 0 | N.A. | 0 |
| RPRM        | 0,07654126  |              | 0 | N.A. | 0 |
| SERF1A      | 0,076529716 | -0,172128885 | 0 | N.A. | 0 |
| MAFA        | 0,076440541 | 0,179732487  | 0 | N.A. | 0 |
| ZNF750      | 0,076397623 | 0,115842729  | 0 | N.A. | 0 |
| RP11-596D21 | 0,076387269 | 0,017660603  | 0 | N.A. | 0 |
| DAGLB       | 0,076332473 | 0,050761907  | 0 | N.A. | 0 |
| EPB41L3     | 0,076312908 | -0,084663518 | 0 | N.A. | 0 |
| TCF4        | 0,076282344 | -0,293747388 | 0 | N.A. | 0 |
| AGFG2       | 0,076260728 | 0,056944972  | 0 | N.A. | 0 |
| ANTXR1      | 0,076257197 | -0,076368387 | 0 | N.A. | 0 |
| AC010226.4  | 0,07620584  | 0,240812673  | 0 | N.A. | 0 |

|              |             |              |   |      |   |
|--------------|-------------|--------------|---|------|---|
| RBM27        | 0,076182646 | 0,018672808  | 0 | N.A. | 0 |
| RP11-572B2.  | 0,076177861 | -0,03847024  | 0 | N.A. | 0 |
| MAFB         | 0,076146192 | 0,209351069  | 0 | N.A. | 0 |
| CTD-3195I5.3 | 0,076101088 |              | 0 | N.A. | 0 |
| NBPF14       | 0,076082638 | 0,355626044  | 0 | N.A. | 0 |
| RP11-268G12  | 0,076080105 |              | 0 | N.A. | 0 |
| ZBTB47       | 0,076042425 | -0,010611322 | 0 | N.A. | 0 |
| NAGK         | 0,07602614  | 0,090437545  | 0 | N.A. | 0 |
| NFX1         | 0,076022483 | 0,24917067   | 0 | N.A. | 0 |
| TMEM150A     | 0,076017073 | 0,292696534  | 0 | N.A. | 0 |
| GS1-393G12.  | 0,075924715 |              | 0 | N.A. | 0 |
| OSBPL7       | 0,075919493 | 0,256541175  | 0 | N.A. | 0 |
| PISD         | 0,075917551 | -0,057932049 | 0 | N.A. | 0 |
| HIST2H2BF    | 0,075914558 | 0,002520217  | 0 | N.A. | 0 |
| CELSR3       | 0,075882455 | 0,041810444  | 0 | N.A. | 0 |
| YJEFN3       | 0,075858084 | -0,114874708 | 0 | N.A. | 0 |
| TNFSF8       | 0,07578584  | -0,225987027 | 0 | N.A. | 0 |
| CCDC30       | 0,075776781 | 0,303148854  | 0 | N.A. | 0 |
| MYO18B       | 0,075748189 |              | 0 | N.A. | 0 |
| SLC26A7      | 0,075719304 | 0,384058979  | 0 | N.A. | 0 |
| SLC36A1      | 0,075703579 | 0,248864197  | 0 | N.A. | 0 |
| RAB3IL1      | 0,075697982 | 0,006860894  | 0 | N.A. | 0 |
| LINC01547    | 0,075695261 | 0,018619211  | 0 | N.A. | 0 |
| XPNPEP2      | 0,075683453 | 0,068190864  | 0 | N.A. | 0 |
| RP11-483F11  | 0,075682606 | -0,181814791 | 0 | N.A. | 0 |
| ZMIZ1-AS1    | 0,075642479 | -0,162231019 | 0 | N.A. | 0 |
| NMT2         | 0,075570113 | 0,066800272  | 0 | N.A. | 0 |
| ABHD13       | 0,075564261 | 0,523815065  | 0 | N.A. | 0 |
| RP5-1011O1.  | 0,075548937 | 0,009567155  | 0 | N.A. | 0 |
| TSHZ2        | 0,075544079 | 0,151584027  | 0 | N.A. | 0 |
| FRMPD1       | 0,075531748 | 0,467787713  | 0 | N.A. | 0 |
| DDX26B       | 0,075511877 | 0,253001611  | 0 | N.A. | 0 |
| CHD9         | 0,075498559 | 0,118952556  | 0 | N.A. | 0 |

|              |             |              |   |      |   |
|--------------|-------------|--------------|---|------|---|
| SLC35G2      | 0,075477733 | 0,118432464  | 0 | N.A. | 0 |
| KISS1R       | 0,075468803 |              | 0 | N.A. | 0 |
| RHOXF1       | 0,075430477 | 0,038842384  | 0 | N.A. | 0 |
| LAMA1        | 0,075404093 | 0,123167657  | 0 | N.A. | 0 |
| SPHK1        | 0,075377583 | 0,215590888  | 0 | N.A. | 0 |
| ATP8B3       | 0,075347734 | 0,058065477  | 0 | N.A. | 0 |
| PORCN        | 0,075340399 | 0,379189609  | 0 | N.A. | 0 |
| IGLL5        | 0,075303    | 0,008142199  | 0 | N.A. | 0 |
| PPIAL4G      | 0,075297453 | 0,128776045  | 0 | N.A. | 0 |
| PACRG        | 0,075246745 | 0,021921613  | 0 | N.A. | 0 |
| LINC00276    | 0,075222492 |              | 0 | N.A. | 0 |
| RP11-5C23.2  | 0,075216361 | -0,017094967 | 0 | N.A. | 0 |
| SIGLEC15     | 0,075164185 | -0,234032755 | 0 | N.A. | 0 |
| GNB4         | 0,075145314 | -0,203430869 | 0 | N.A. | 0 |
| TRIM31-AS1   | 0,075134509 | 0,123240753  | 0 | N.A. | 0 |
| NPIPA3       | 0,075112181 | 0,206831419  | 0 | N.A. | 0 |
| CNTN3        | 0,075110047 | -0,005346951 | 0 | N.A. | 0 |
| RP3-394A18.  | 0,075040811 | -0,025998902 | 0 | N.A. | 0 |
| NFE2L3       | 0,075031108 | 0,161907061  | 0 | N.A. | 0 |
| AC062017.1   | 0,074967069 | 0,005289217  | 0 | N.A. | 0 |
| FRAT1        | 0,074960963 | 0,056206519  | 0 | N.A. | 0 |
| RP5-1125A1.1 | 0,074938133 | 0,360823818  | 0 | N.A. | 0 |
| ASIP         | 0,074932647 | 0,004418455  | 0 | N.A. | 0 |
| CBWD3        | 0,074897392 | 0,062842876  | 0 | N.A. | 0 |
| PF4          | 0,074889544 | 0,12123127   | 0 | N.A. | 0 |
| COL4A2       | 0,07482664  | -0,114964081 | 0 | N.A. | 0 |
| PDE8B        | 0,074778997 |              | 0 | N.A. | 0 |
| GOLT1A       | 0,074738219 | -0,174083824 | 0 | N.A. | 0 |
| ZNF852       | 0,074735772 | 0,044473391  | 0 | N.A. | 0 |
| KCNH2        | 0,074731724 | 0,023057619  | 0 | N.A. | 0 |
| NACC1        | 0,07471732  | -0,021840265 | 0 | N.A. | 0 |
| NIPAL3       | 0,074681492 | 0,29728355   | 0 | N.A. | 0 |
| ELF2         | 0,074611055 | 0,184456847  | 0 | N.A. | 0 |

|             |             |              |   |      |   |
|-------------|-------------|--------------|---|------|---|
| HMGN4       | 0,074581253 | -0,237362249 | 0 | N.A. | 0 |
| RP3-500L14. | 0,074564729 | -0,252964371 | 0 | N.A. | 0 |
| P2RX7       | 0,074555752 | 0,016442452  | 0 | N.A. | 0 |
| ZNF730      | 0,074545694 | -0,240987153 | 0 | N.A. | 0 |
| KIAA1841    | 0,074525418 | 0,303219891  | 0 | N.A. | 0 |
| RP4-742C19. | 0,074525279 | 0,019869434  | 0 | N.A. | 0 |
| RP11-723O4. | 0,074519985 | 0,264381868  | 0 | N.A. | 0 |
| PHLDB3      | 0,07447712  | 0,074201441  | 0 | N.A. | 0 |
| FAM89A      | 0,074471404 | -0,005071667 | 0 | N.A. | 0 |
| FAM3D       | 0,074451279 | 0,204792151  | 0 | N.A. | 0 |
| MZF1        | 0,074435674 | 0,321453759  | 0 | N.A. | 0 |
| AC004854.4  | 0,074341454 | 0,185387383  | 0 | N.A. | 0 |
| IGKV1-8     | 0,074280677 |              | 0 | N.A. | 0 |
| MAP1S       | 0,0742351   | 0,308542646  | 0 | N.A. | 0 |
| SH2D5       | 0,074218674 | -0,229621299 | 0 | N.A. | 0 |
| CADM1       | 0,074203159 | -0,012935664 | 0 | N.A. | 0 |
| ZNF678      | 0,074178538 | -0,133590711 | 0 | N.A. | 0 |
| MEIS2       | 0,074113291 | 0,224887314  | 0 | N.A. | 0 |
| RP11-568A7. | 0,074078154 | 0,349881932  | 0 | N.A. | 0 |
| SARM1       | 0,074057844 | -0,034847562 | 0 | N.A. | 0 |
| ZNF621      | 0,074055954 | 0,342808913  | 0 | N.A. | 0 |
| SMUG1       | 0,074007339 | 0,117958322  | 0 | N.A. | 0 |
| SPHK2       | 0,073976325 | 0,172421696  | 0 | N.A. | 0 |
| TMEM167A    | 0,073949495 | -0,085617605 | 0 | N.A. | 0 |
| ZFP41       | 0,073944509 | 0,14890546   | 0 | N.A. | 0 |
| LINC01376   | 0,073943523 | 0,084621612  | 0 | N.A. | 0 |
| PPIP5K2     | 0,073926625 | -0,141598391 | 0 | N.A. | 0 |
| ZNF687      | 0,073919042 | -0,040748609 | 0 | N.A. | 0 |
| RP11-214K3. | 0,073825159 | 0,052117311  | 0 | N.A. | 0 |
| RP11-341G23 | 0,073817842 | 0,000518573  | 0 | N.A. | 0 |
| C3orf58     | 0,073704741 | 0,124851438  | 0 | N.A. | 0 |
| TRIM4       | 0,073704528 | -0,057821915 | 0 | N.A. | 0 |
| IFIT5       | 0,07369705  | 0,017287948  | 0 | N.A. | 0 |

|             |             |              |   |      |   |
|-------------|-------------|--------------|---|------|---|
| RP11-115C10 | 0,07368556  |              | 0 | N.A. | 0 |
| RNF220      | 0,073662376 | 0,262801037  | 0 | N.A. | 0 |
| RP11-130L8. | 0,073646324 | 0,003424039  | 0 | N.A. | 0 |
| HLA-DRA     | 0,073641048 | -0,473620746 | 0 | N.A. | 0 |
| ELOVL3      | 0,073586891 | -0,069730469 | 0 | N.A. | 0 |
| NOMO3       | 0,073583621 | 0,247849928  | 0 | N.A. | 0 |
| AC011288.2  | 0,073574479 | -0,099420258 | 0 | N.A. | 0 |
| LGALS2      | 0,073563712 | 0,167915751  | 0 | N.A. | 0 |
| CCDC90B     | 0,073536456 | -0,354636851 | 0 | N.A. | 0 |
| MOSPD3      | 0,073519257 | -0,142567445 | 0 | N.A. | 0 |
| CTC-543D15. | 0,073434337 | -0,050075603 | 0 | N.A. | 0 |
| CD8A        | 0,073355292 | 0,053885187  | 0 | N.A. | 0 |
| DNLZ        | 0,073326679 | -0,106661849 | 0 | N.A. | 0 |
| C6orf99     | 0,073319868 | -0,054733693 | 0 | N.A. | 0 |
| RFX7        | 0,073310032 | -0,164498856 | 0 | N.A. | 0 |
| MOG         | 0,073298717 |              | 0 | N.A. | 0 |
| FBXL5       | 0,073253748 | 0,026755219  | 0 | N.A. | 0 |
| THAP6       | 0,073241559 | -0,091976096 | 0 | N.A. | 0 |
| ZNF19       | 0,073227275 | -0,226466843 | 0 | N.A. | 0 |
| PNPLA1      | 0,073151226 |              | 0 | N.A. | 0 |
| RP4-550H1.7 | 0,073145279 | -0,149220003 | 0 | N.A. | 0 |
| PLAG1       | 0,073139828 | 0,153748449  | 0 | N.A. | 0 |
| AC026188.1  | 0,073022107 | 0,221653306  | 0 | N.A. | 0 |
| RP11-298J20 | 0,072998379 | 0,084472399  | 0 | N.A. | 0 |
| S100A8      | 0,072987094 | -0,085862165 | 0 | N.A. | 0 |
| ZNF26       | 0,072984582 | 0,178904303  | 0 | N.A. | 0 |
| RP11-307E17 | 0,07295188  | 0,293802749  | 0 | N.A. | 0 |
| STX1A       | 0,072939916 | 0,452460119  | 0 | N.A. | 0 |
| GP1BA       | 0,072935994 | -0,005610392 | 0 | N.A. | 0 |
| AC015987.1  | 0,072932325 | 0,36909902   | 0 | N.A. | 0 |
| RP11-2H3.6  | 0,072923289 | 0,258695592  | 0 | N.A. | 0 |
| ZNF552      | 0,072893378 | 0,114098352  | 0 | N.A. | 0 |
| ARAP1       | 0,072888326 | 0,157301156  | 0 | N.A. | 0 |



|              |             |              |   |      |   |
|--------------|-------------|--------------|---|------|---|
| NHEJ1        | 0,072849697 | -0,283952602 | 0 | N.A. | 0 |
| BAG3         | 0,072839731 | 0,400157152  | 0 | N.A. | 0 |
| SCNM1        | 0,072839341 | 0,193012902  | 0 | N.A. | 0 |
| RP11-1220K2  | 0,072827739 | 0,232810494  | 0 | N.A. | 0 |
| ZNF483       | 0,072801092 | -0,096315385 | 0 | N.A. | 0 |
| RP11-72I8.1  | 0,072761401 | 0,043313585  | 0 | N.A. | 0 |
| IGHV4-59     | 0,07271938  | -0,210439137 | 0 | N.A. | 0 |
| ENDOV        | 0,072711901 | 0,01810276   | 0 | N.A. | 0 |
| C1QTNF2      | 0,072689773 | -0,239290773 | 0 | N.A. | 0 |
| RP11-637O19  | 0,072684794 | 0,171832858  | 0 | N.A. | 0 |
| FAM20C       | 0,072684064 | 0,321482037  | 0 | N.A. | 0 |
| PPP1R36      | 0,072570763 | 0,011678702  | 0 | N.A. | 0 |
| RP5-837J1.4  | 0,072570578 | -0,016235705 | 0 | N.A. | 0 |
| NPTX1        | 0,072522628 |              | 0 | N.A. | 0 |
| AP1G2        | 0,072520064 | 0,277812666  | 0 | N.A. | 0 |
| TAP1         | 0,072517128 | 0,282144155  | 0 | N.A. | 0 |
| CTD-2589H19  | 0,072492424 | 0,22133668   | 0 | N.A. | 0 |
| LINC01285    | 0,072417356 | -0,067673977 | 0 | N.A. | 0 |
| ELMO2        | 0,072382047 | 0,03142639   | 0 | N.A. | 0 |
| TAGAP        | 0,072358157 | -0,003492776 | 0 | N.A. | 0 |
| RP4-669L17.1 | 0,072336941 | 0,066871942  | 0 | N.A. | 0 |
| HHAT         | 0,072277866 | 0,016861483  | 0 | N.A. | 0 |
| S1PR4        | 0,072276727 | -0,212772214 | 0 | N.A. | 0 |
| AP003068.9   | 0,072261145 | -0,031998442 | 0 | N.A. | 0 |
| IGLC7        | 0,07225918  | 0,232464176  | 0 | N.A. | 0 |
| MAPK1IP1L    | 0,072253237 | 0,12007669   | 0 | N.A. | 0 |
| ZNF860       | 0,072209688 | -0,094169264 | 0 | N.A. | 0 |
| CTD-2017F17  | 0,072184629 | 0,084205757  | 0 | N.A. | 0 |
| ZNF548       | 0,072167904 | -0,184127325 | 0 | N.A. | 0 |
| CARKD        | 0,072161523 | 0,39517598   | 0 | N.A. | 0 |
| C20orf24     | 0,072157107 | 0,143301379  | 0 | N.A. | 0 |
| PI15         | 0,072089844 | -0,033794926 | 0 | N.A. | 0 |
| PCDHB15      | 0,07208601  | 0,021693875  | 0 | N.A. | 0 |

|             |             |              |   |      |   |
|-------------|-------------|--------------|---|------|---|
| RP11-631N10 | 0,072083299 | 0,211239837  | 0 | N.A. | 0 |
| ZC3H12D     | 0,072067587 | 0,241227934  | 0 | N.A. | 0 |
| C9orf66     | 0,072066143 | -0,143335435 | 0 | N.A. | 0 |
| CNN2        | 0,072040971 | -0,102320618 | 0 | N.A. | 0 |
| FILIP1L     | 0,072036345 | 0,068263421  | 0 | N.A. | 0 |
| ANKRD6      | 0,072033342 | -0,007354161 | 0 | N.A. | 0 |
| VWA5A       | 0,071985961 | 0,212946959  | 0 | N.A. | 0 |
| FAM167B     | 0,071981799 | 0,076062312  | 0 | N.A. | 0 |
| KIAA1468    | 0,071962883 | 0,337201995  | 0 | N.A. | 0 |
| HMGA1P4     | 0,071891264 | 0,472254829  | 0 | N.A. | 0 |
| METTTL25    | 0,071874301 | -0,098562755 | 0 | N.A. | 0 |
| FAM47E-STB  | 0,071861366 | 0,460513542  | 0 | N.A. | 0 |
| ASXL2       | 0,071844962 | 0,104873569  | 0 | N.A. | 0 |
| RP11-946L16 | 0,071842327 |              | 0 | N.A. | 0 |
| SERPINE1    | 0,071838524 | 0,161054976  | 0 | N.A. | 0 |
| CERS6       | 0,071802388 | 0,417365719  | 0 | N.A. | 0 |
| SLC26A6     | 0,071785903 | 0,230314302  | 0 | N.A. | 0 |
| RP11-884K10 | 0,071775839 | -0,066064479 | 0 | N.A. | 0 |
| SPTLC3      | 0,071761568 | 0,025165542  | 0 | N.A. | 0 |
| ABCB6       | 0,071732731 | 0,157868486  | 0 | N.A. | 0 |
| RP11-276H7. | 0,071696301 | 0,179801128  | 0 | N.A. | 0 |
| TTLL6       | 0,071694711 | -0,113429854 | 0 | N.A. | 0 |
| BNIP1L      | 0,071674272 | 0,047134007  | 0 | N.A. | 0 |
| RNF121      | 0,071670116 | 0,2215187    | 0 | N.A. | 0 |
| HIST2H2AB   | 0,071663795 | -0,223511591 | 0 | N.A. | 0 |
| KANSL1L     | 0,071649995 | 0,024870932  | 0 | N.A. | 0 |
| STAU2       | 0,071633739 | 0,156940432  | 0 | N.A. | 0 |
| ATP8B2      | 0,071604067 |              | 0 | N.A. | 0 |
| ZNF236      | 0,071599907 | -0,25513769  | 0 | N.A. | 0 |
| AC116366.5  | 0,071556343 | -0,088758096 | 0 | N.A. | 0 |
| SPRED3      | 0,07154318  | 0,335242931  | 0 | N.A. | 0 |
| NEURL2      | 0,07151734  | 0,249683091  | 0 | N.A. | 0 |
| POLDIP3     | 0,071507073 | 0,370438808  | 0 | N.A. | 0 |

|             |             |              |   |      |   |
|-------------|-------------|--------------|---|------|---|
| SLC6A7      | 0,07150604  | 0,238793933  | 0 | N.A. | 0 |
| LY86        | 0,071490521 | -0,116428664 | 0 | N.A. | 0 |
| FAM21A      | 0,071453336 | 0,235286531  | 0 | N.A. | 0 |
| TTC34       | 0,071444649 | 0,168422275  | 0 | N.A. | 0 |
| TRIM3       | 0,071442096 | 0,507148594  | 0 | N.A. | 0 |
| CTD-2139B19 | 0,071419795 | -0,26790159  | 0 | N.A. | 0 |
| ANKRD24     | 0,07137634  | -0,020792332 | 0 | N.A. | 0 |
| DENND5A     | 0,071327823 | -0,043238967 | 0 | N.A. | 0 |
| DLEC1       | 0,071305589 | -0,057846169 | 0 | N.A. | 0 |
| AC131056.3  | 0,071275406 |              | 0 | N.A. | 0 |
| RP11-283G6. | 0,071238366 | -0,039800382 | 0 | N.A. | 0 |
| FBXO10      | 0,071209935 | 0,030158628  | 0 | N.A. | 0 |
| KDM5D       | 0,071148045 | 0,030017958  | 0 | N.A. | 0 |
| AEBP1       | 0,071145223 | -0,076373348 | 0 | N.A. | 0 |
| IGKV1-16    | 0,071117355 |              | 0 | N.A. | 0 |
| NFKBIB      | 0,07111701  | 0,053660805  | 0 | N.A. | 0 |
| HLA-DMB     | 0,071102392 | -0,041301473 | 0 | N.A. | 0 |
| TMEM178A    | 0,071101005 | 0,119278854  | 0 | N.A. | 0 |
| ODF3L1      | 0,071043179 | -0,038008442 | 0 | N.A. | 0 |
| RP11-348N5. | 0,071034926 | 0,256509466  | 0 | N.A. | 0 |
| ASIC3       | 0,071020267 | -0,02982322  | 0 | N.A. | 0 |
| SLC4A3      | 0,070994415 | -0,085731317 | 0 | N.A. | 0 |
| RP11-866E20 | 0,07098558  |              | 0 | N.A. | 0 |
| RP11-707G14 | 0,070879109 | -0,08579064  | 0 | N.A. | 0 |
| RP11-356C4. | 0,070874764 | 0,106437278  | 0 | N.A. | 0 |
| LOX         | 0,070868829 | 0,059717182  | 0 | N.A. | 0 |
| RP11-14N7.2 | 0,070841602 | -0,091504421 | 0 | N.A. | 0 |
| RP11-160O5. | 0,070839359 | -0,243766387 | 0 | N.A. | 0 |
| AP000295.10 | 0,070825347 | 0,003684149  | 0 | N.A. | 0 |
| STAT5B      | 0,070787323 | 0,436927371  | 0 | N.A. | 0 |
| HAL         | 0,070760297 | 0,051948529  | 0 | N.A. | 0 |
| CLIC1       | 0,070747517 | -0,16227017  | 0 | N.A. | 0 |
| TCL1A       | 0,070726392 | -0,377631941 | 0 | N.A. | 0 |

|             |             |              |   |      |   |
|-------------|-------------|--------------|---|------|---|
| CTD-3051D2  | 0,070704754 | 0,350789002  | 0 | N.A. | 0 |
| RP11-90E5.1 | 0,070679568 |              | 0 | N.A. | 0 |
| SEPT4       | 0,070622595 |              | 0 | N.A. | 0 |
| TNNI1       | 0,070621391 | 0,038967506  | 0 | N.A. | 0 |
| PROC        | 0,070594705 | -0,04451116  | 0 | N.A. | 0 |
| HTR4        | 0,070540986 | -0,100037818 | 0 | N.A. | 0 |
| NIN         | 0,070500783 | 0,012598566  | 0 | N.A. | 0 |
| RBM41       | 0,070498692 | 0,329729064  | 0 | N.A. | 0 |
| RP11-130C19 | 0,070418931 |              | 0 | N.A. | 0 |
| FBXL19-AS1  | 0,07041051  | -0,026755867 | 0 | N.A. | 0 |
| SLC4A8      | 0,070386122 | -0,040010255 | 0 | N.A. | 0 |
| NOP14-AS1   | 0,070372984 | 0,160882221  | 0 | N.A. | 0 |
| GGT7        | 0,070363618 | 0,131830357  | 0 | N.A. | 0 |
| RING1       | 0,070308182 | 0,043802826  | 0 | N.A. | 0 |
| CYP4A22-AS1 | 0,070307149 | -0,1001894   | 0 | N.A. | 0 |
| CACNA2D3    | 0,070303693 |              | 0 | N.A. | 0 |
| RP5-965G21  | 0,070296205 | -0,062711259 | 0 | N.A. | 0 |
| CDKL3       | 0,070285465 | 0,030428954  | 0 | N.A. | 0 |
| SH3GL1      | 0,070266194 | 0,316568468  | 0 | N.A. | 0 |
| SIM2        | 0,070092846 | -0,07301073  | 0 | N.A. | 0 |
| ODF2L       | 0,070090046 | 0,285084491  | 0 | N.A. | 0 |
| AL356585.2  | 0,070060348 | 0,087419937  | 0 | N.A. | 0 |
| SIGLEC12    | 0,070042905 |              | 0 | N.A. | 0 |
| AC005264.2  | 0,070040932 |              | 0 | N.A. | 0 |
| FRMPD2      | 0,070038107 | -0,052088583 | 0 | N.A. | 0 |
| CCDC84      | 0,070011833 | 0,308075611  | 0 | N.A. | 0 |
| PDF         | 0,070001926 | -0,18269102  | 0 | N.A. | 0 |
| KLHL3       | 0,069915294 | -0,220481209 | 0 | N.A. | 0 |
| KCND2       | 0,069890037 |              | 0 | N.A. | 0 |
| IGSF1       | 0,069870841 | -0,274724751 | 0 | N.A. | 0 |
| WDPCP       | 0,069860306 | -0,00836446  | 0 | N.A. | 0 |
| MIA3        | 0,069821558 | 0,431299939  | 0 | N.A. | 0 |
| MCC         | 0,069806372 | 0,006447309  | 0 | N.A. | 0 |

|             |             |              |   |      |   |
|-------------|-------------|--------------|---|------|---|
| FOXA1       | 0,069798817 | 0,113735     | 0 | N.A. | 0 |
| SGMS1       | 0,069795843 | 0,240112736  | 0 | N.A. | 0 |
| IMPAD1      | 0,069793909 | 0,273498217  | 0 | N.A. | 0 |
| PTPLA       | 0,069667149 | 0,039317366  | 0 | N.A. | 0 |
| RP11-299H2  | 0,069647584 |              | 0 | N.A. | 0 |
| MED8        | 0,069612608 | -0,079994461 | 0 | N.A. | 0 |
| U2AF1L4     | 0,069592316 | -0,061727452 | 0 | N.A. | 0 |
| PHRF1       | 0,069526671 | 0,027276976  | 0 | N.A. | 0 |
| NFKBIA      | 0,069504887 | 0,193770927  | 0 | N.A. | 0 |
| LRAT        | 0,06948199  | 0,149188972  | 0 | N.A. | 0 |
| STC1        | 0,069434662 | 0,109863961  | 0 | N.A. | 0 |
| KAZALD1     | 0,069402553 | 0,128783795  | 0 | N.A. | 0 |
| KLHL20      | 0,069392439 | -0,010733512 | 0 | N.A. | 0 |
| SKAP1       | 0,069376474 | -0,195778971 | 0 | N.A. | 0 |
| RP11-219D15 | 0,069330429 | 0,365574284  | 0 | N.A. | 0 |
| C1QTNF9     | 0,069284704 |              | 0 | N.A. | 0 |
| KRT18       | 0,069275559 | 0,359484335  | 0 | N.A. | 0 |
| JMJD7-PLA20 | 0,069254501 | -0,026486086 | 0 | N.A. | 0 |
| MPDZ        | 0,069210134 | 0,114902595  | 0 | N.A. | 0 |
| RP11-306G20 | 0,069188963 | 0,428055581  | 0 | N.A. | 0 |
| AC144652.1  | 0,069167261 | -0,036665656 | 0 | N.A. | 0 |
| AKIRIN2     | 0,069127681 | -0,03884025  | 0 | N.A. | 0 |
| FZD8        | 0,069101239 | -0,074865994 | 0 | N.A. | 0 |
| RP5-1180E21 | 0,06904536  | -0,137152695 | 0 | N.A. | 0 |
| ARNT        | 0,068983352 | 0,047263614  | 0 | N.A. | 0 |
| RP11-439C15 | 0,068983305 |              | 0 | N.A. | 0 |
| ADORA2A-AS  | 0,068961003 | 0,06615666   | 0 | N.A. | 0 |
| AMBRA1      | 0,068939288 | 0,005827227  | 0 | N.A. | 0 |
| GPR125      | 0,068935813 | 0,269976463  | 0 | N.A. | 0 |
| C5orf30     | 0,068904508 | 0,069688685  | 0 | N.A. | 0 |
| ACAN        | 0,06889784  |              | 0 | N.A. | 0 |
| CDHR4       | 0,068897453 | 0,033299464  | 0 | N.A. | 0 |
| RAVER2      | 0,06889662  | 0,046255476  | 0 | N.A. | 0 |

|              |             |              |   |      |   |
|--------------|-------------|--------------|---|------|---|
| SOCS7        | 0,06882344  | -0,139330797 | 0 | N.A. | 0 |
| CFAP70       | 0,068771513 | -0,031379665 | 0 | N.A. | 0 |
| C3orf18      | 0,068769448 | -0,022044493 | 0 | N.A. | 0 |
| ZFP91        | 0,068765867 | 0,075382245  | 0 | N.A. | 0 |
| AC097724.3   | 0,068744136 | 0,424751393  | 0 | N.A. | 0 |
| FKRP         | 0,068693725 | -0,031145446 | 0 | N.A. | 0 |
| AC241585.2   | 0,068690244 | 0,092853715  | 0 | N.A. | 0 |
| HEPHL1       | 0,068671009 | 0,057779679  | 0 | N.A. | 0 |
| ZEB2-AS1     | 0,068665969 |              | 0 | N.A. | 0 |
| RP11-785D18  | 0,0686147   | 0,025987602  | 0 | N.A. | 0 |
| RP11-802E16  | 0,068576013 | 0,201207919  | 0 | N.A. | 0 |
| RP11-680F8.  | 0,068534526 | -0,230960244 | 0 | N.A. | 0 |
| RP11-334J6.6 | 0,068507791 | 0,14117977   | 0 | N.A. | 0 |
| RP11-872D17  | 0,068494039 |              | 0 | N.A. | 0 |
| RP11-45M22   | 0,068444652 | 0,358898778  | 0 | N.A. | 0 |
| GHRL         | 0,068390496 |              | 0 | N.A. | 0 |
| XXyac-YX65C  | 0,068377981 | 0,302337829  | 0 | N.A. | 0 |
| NFATC3       | 0,068359592 | 0,127222884  | 0 | N.A. | 0 |
| SOGA1        | 0,068357945 | -0,150867366 | 0 | N.A. | 0 |
| RP11-511B23  | 0,068328069 | -0,262843891 | 0 | N.A. | 0 |
| RP11-701H16  | 0,068318259 |              | 0 | N.A. | 0 |
| RP11-179K3.  | 0,068154859 | 0,028752686  | 0 | N.A. | 0 |
| ZNF641       | 0,068126616 | 0,126440313  | 0 | N.A. | 0 |
| ATN1         | 0,068090193 | 0,399112748  | 0 | N.A. | 0 |
| RP11-531A24  | 0,068065514 |              | 0 | N.A. | 0 |
| TKTL1        | 0,068062193 |              | 0 | N.A. | 0 |
| ERICH2       | 0,068057817 | 0,222382019  | 0 | N.A. | 0 |
| RP3-324O17.  | 0,068035315 | 0,031621702  | 0 | N.A. | 0 |
| FAM76A       | 0,068033524 | 0,041783571  | 0 | N.A. | 0 |
| RP11-496H1.  | 0,068009659 | -0,051662823 | 0 | N.A. | 0 |
| AZI2         | 0,067995716 | -0,400032081 | 0 | N.A. | 0 |
| STMN3        | 0,067987071 | 0,276913998  | 0 | N.A. | 0 |
| RP11-11N5.3  | 0,067982373 | -0,117858358 | 0 | N.A. | 0 |

|             |             |              |   |      |   |
|-------------|-------------|--------------|---|------|---|
| EXOC3L2     | 0,067981138 | 0,136627972  | 0 | N.A. | 0 |
| GPR183      | 0,067954838 | 0,312274306  | 0 | N.A. | 0 |
| KCNH8       | 0,067949426 | 0,209311646  | 0 | N.A. | 0 |
| PSKH1       | 0,067902288 | -0,042883622 | 0 | N.A. | 0 |
| CAPNS2      | 0,067898062 |              | 0 | N.A. | 0 |
| ZNF558      | 0,067867006 | 0,07238043   | 0 | N.A. | 0 |
| LRRC56      | 0,067815721 | -0,105475779 | 0 | N.A. | 0 |
| VPS37D      | 0,067782675 | 0,074802422  | 0 | N.A. | 0 |
| FGF13       | 0,067757002 | -0,121235483 | 0 | N.A. | 0 |
| SLFNL1      | 0,067752372 |              | 0 | N.A. | 0 |
| REST        | 0,067746501 | 0,241312822  | 0 | N.A. | 0 |
| ORAI2       | 0,067715921 | 0,083938904  | 0 | N.A. | 0 |
| KLF7        | 0,067693322 | 0,143988714  | 0 | N.A. | 0 |
| TTC31       | 0,067682195 | 0,273794221  | 0 | N.A. | 0 |
| RP11-7F18.2 | 0,067593054 | -0,084673042 | 0 | N.A. | 0 |
| LIN7C       | 0,067572354 | 0,270363036  | 0 | N.A. | 0 |
| EXOC4       | 0,067570641 | -0,034149896 | 0 | N.A. | 0 |
| SLC39A11    | 0,067560553 | 0,165890997  | 0 | N.A. | 0 |
| ACTN1-AS1   | 0,067525181 | -0,041517328 | 0 | N.A. | 0 |
| CTB-51J22.1 | 0,067469122 | -0,140944943 | 0 | N.A. | 0 |
| MTRNR2L3    | 0,067462127 | 0,23918097   | 0 | N.A. | 0 |
| SIX4        | 0,067462018 | 0,098418771  | 0 | N.A. | 0 |
| GS1-124K5.3 | 0,067413437 | 0,088383428  | 0 | N.A. | 0 |
| U47924.31   | 0,067395122 | -0,126925023 | 0 | N.A. | 0 |
| MAP4K1      | 0,06739268  | -0,322186582 | 0 | N.A. | 0 |
| KBTBD11-OT  | 0,067334124 | 0,064872324  | 0 | N.A. | 0 |
| PYHIN1      | 0,067295027 | 0,064720984  | 0 | N.A. | 0 |
| EPHX3       | 0,067266019 | 0,047943544  | 0 | N.A. | 0 |
| RAB30       | 0,067260464 | 0,06222274   | 0 | N.A. | 0 |
| CHST3       | 0,067259645 | 0,445034787  | 0 | N.A. | 0 |
| DNM3OS      | 0,067241077 | -0,029552105 | 0 | N.A. | 0 |
| SERPINB9P1  | 0,067231882 | 0,482810453  | 0 | N.A. | 0 |
| RP11-663N2  | 0,067221366 | 0,048427928  | 0 | N.A. | 0 |

|             |             |              |   |      |   |
|-------------|-------------|--------------|---|------|---|
| PRDM10      | 0,067215095 | 0,207124506  | 0 | N.A. | 0 |
| BHLHE40-AS1 | 0,067169963 | -0,240967093 | 0 | N.A. | 0 |
| HCG17       | 0,067168021 | 0,052935631  | 0 | N.A. | 0 |
| NEB         | 0,06715681  | 0,049687658  | 0 | N.A. | 0 |
| MED22       | 0,067154383 | 0,081020549  | 0 | N.A. | 0 |
| RP11-84A19. | 0,067152497 |              | 0 | N.A. | 0 |
| DYNC2H1     | 0,067137723 | -0,058641008 | 0 | N.A. | 0 |
| NPHP4       | 0,06708406  | -0,12237398  | 0 | N.A. | 0 |
| FAM71A      | 0,067063933 | 0,383258909  | 0 | N.A. | 0 |
| C2orf42     | 0,067053526 | 0,170019662  | 0 | N.A. | 0 |
| LINC01254   | 0,067006815 |              | 0 | N.A. | 0 |
| NHS         | 0,066985485 | 0,214559943  | 0 | N.A. | 0 |
| ASB15       | 0,066972705 |              | 0 | N.A. | 0 |
| C8orf37-AS1 | 0,066842567 | 0,128767606  | 0 | N.A. | 0 |
| HECW1       | 0,066831502 | -0,291836401 | 0 | N.A. | 0 |
| SPAG7       | 0,066828581 | -0,00427233  | 0 | N.A. | 0 |
| CTSG        | 0,06681465  | -0,15803553  | 0 | N.A. | 0 |
| CSGALNACT1  | 0,066799899 | 0,114598185  | 0 | N.A. | 0 |
| DNM1P35     | 0,066766398 | 0,240488401  | 0 | N.A. | 0 |
| CTC-534A2.2 | 0,066752396 | -0,355488821 | 0 | N.A. | 0 |
| ZNF541      | 0,066744182 | -0,145976741 | 0 | N.A. | 0 |
| FBXO43      | 0,066740337 | 0,297885367  | 0 | N.A. | 0 |
| ANKRD36B    | 0,06672513  | -0,029415241 | 0 | N.A. | 0 |
| IMPG2       | 0,06672394  | 0,181331739  | 0 | N.A. | 0 |
| KRT10       | 0,066706991 | 0,031270327  | 0 | N.A. | 0 |
| MPZL2       | 0,06668836  | 0,274691473  | 0 | N.A. | 0 |
| LIMD1       | 0,066680287 | -0,280977588 | 0 | N.A. | 0 |
| AC100830.3  | 0,066662629 |              | 0 | N.A. | 0 |
| ATE1        | 0,066661535 | 0,116523462  | 0 | N.A. | 0 |
| RGS5        | 0,066621168 | -0,297550782 | 0 | N.A. | 0 |
| A2ML1       | 0,06660675  | 0,071140188  | 0 | N.A. | 0 |
| RP1-56K13.2 | 0,066587705 | 0,331175731  | 0 | N.A. | 0 |
| AKT3        | 0,066581854 |              | 0 | N.A. | 0 |



|             |             |              |   |      |   |
|-------------|-------------|--------------|---|------|---|
| PHKA2       | 0,06657212  | -0,151513842 | 0 | N.A. | 0 |
| BACH1-AS1   | 0,066522053 | -0,110432137 | 0 | N.A. | 0 |
| ZNF525      | 0,066503738 | -0,043749148 | 0 | N.A. | 0 |
| LTBP2       | 0,06645254  | 0,112033693  | 0 | N.A. | 0 |
| LRRN2       | 0,066447847 | -0,102148919 | 0 | N.A. | 0 |
| NT5DC3      | 0,066382001 | 0,241835225  | 0 | N.A. | 0 |
| RP11-286E11 | 0,066372137 | -0,207182157 | 0 | N.A. | 0 |
| RP11-506K6. | 0,06627562  |              | 0 | N.A. | 0 |
| RP11-34P13. | 0,066180262 | 0,040149845  | 0 | N.A. | 0 |
| ZNF706      | 0,06616267  | 0,129349212  | 0 | N.A. | 0 |
| TNIP2       | 0,066130814 | 0,018389691  | 0 | N.A. | 0 |
| CD248       | 0,066108777 | -0,114691369 | 0 | N.A. | 0 |
| RP11-196G11 | 0,066095659 | 0,048671283  | 0 | N.A. | 0 |
| RP11-83N9.5 | 0,066060683 | 0,201287138  | 0 | N.A. | 0 |
| RBSN        | 0,066012514 | 0,185018308  | 0 | N.A. | 0 |
| BCL2L14     | 0,066003302 | 0,026381127  | 0 | N.A. | 0 |
| TAPBPL      | 0,066001647 | 0,231337076  | 0 | N.A. | 0 |
| IGSF9B      | 0,065943652 | -0,040986441 | 0 | N.A. | 0 |
| RP11-158K1. | 0,06593172  |              | 0 | N.A. | 0 |
| SLC14A2     | 0,0659288   | 0,059496054  | 0 | N.A. | 0 |
| VMO1        | 0,065896502 | 0,337021075  | 0 | N.A. | 0 |
| EDIL3       | 0,065896044 | -0,174906786 | 0 | N.A. | 0 |
| EMX1        | 0,065869422 | 0,023736374  | 0 | N.A. | 0 |
| SLC9A5      | 0,065861229 | -0,009519765 | 0 | N.A. | 0 |
| RP11-686O6. | 0,065851272 | 0,129800096  | 0 | N.A. | 0 |
| RP11-251M1  | 0,065849173 |              | 0 | N.A. | 0 |
| IL2RB       | 0,065841344 | -0,340559857 | 0 | N.A. | 0 |
| KITLG       | 0,065771739 | 0,233459119  | 0 | N.A. | 0 |
| TRIM60      | 0,065728464 | 0,208515838  | 0 | N.A. | 0 |
| GET4        | 0,065723017 | 0,143817409  | 0 | N.A. | 0 |
| HOXC11      | 0,065709091 | 0,146662553  | 0 | N.A. | 0 |
| CTD-3126B10 | 0,06569413  | -0,104490748 | 0 | N.A. | 0 |
| SARAF       | 0,065685175 | 0,179472945  | 0 | N.A. | 0 |

|             |             |              |   |      |   |
|-------------|-------------|--------------|---|------|---|
| BFAR        | 0,06568209  | 0,087199444  | 0 | N.A. | 0 |
| KANSL1-AS1  | 0,065669548 | -0,266397117 | 0 | N.A. | 0 |
| RP11-714G18 | 0,065662451 |              | 0 | N.A. | 0 |
| EREG        | 0,06565167  | 0,385393707  | 0 | N.A. | 0 |
| PSMD5-AS1   | 0,065637065 | 0,36697219   | 0 | N.A. | 0 |
| VSIG4       | 0,065634146 | -0,273115128 | 0 | N.A. | 0 |
| HIATL2      | 0,06559947  | 0,042528257  | 0 | N.A. | 0 |
| RP5-1061H20 | 0,065591374 | -0,031975079 | 0 | N.A. | 0 |
| RP11-536K7. | 0,065536562 | -0,338316193 | 0 | N.A. | 0 |
| SLC16A9     | 0,065503043 | -0,106302693 | 0 | N.A. | 0 |
| HHIPL1      | 0,065500671 |              | 0 | N.A. | 0 |
| FNDC5       | 0,065494955 | -0,008670373 | 0 | N.A. | 0 |
| SUSD2       | 0,065488598 | 0,175777827  | 0 | N.A. | 0 |
| ENO3        | 0,065473549 | -0,026069172 | 0 | N.A. | 0 |
| PAN2        | 0,06547158  | 0,015372844  | 0 | N.A. | 0 |
| XRRA1       | 0,065426761 | 0,047397408  | 0 | N.A. | 0 |
| CNOT8       | 0,065335316 | 0,148790191  | 0 | N.A. | 0 |
| SBSN        | 0,065324503 |              | 0 | N.A. | 0 |
| RP3-460G2.2 | 0,065312908 | -0,232745866 | 0 | N.A. | 0 |
| ANKS4B      | 0,065286467 | 0,056531795  | 0 | N.A. | 0 |
| SLX4        | 0,065267925 | 0,146792817  | 0 | N.A. | 0 |
| RP11-217B1. | 0,065258696 | 0,087689766  | 0 | N.A. | 0 |
| CHRN4       | 0,065246306 | -0,006304325 | 0 | N.A. | 0 |
| RP11-322E11 | 0,065236005 | 0,175349885  | 0 | N.A. | 0 |
| RP11-415F23 | 0,065231826 |              | 0 | N.A. | 0 |
| ORAI1       | 0,06521598  | -0,19990619  | 0 | N.A. | 0 |
| U47924.32   | 0,065207225 |              | 0 | N.A. | 0 |
| WTIP        | 0,065166327 | -0,083631679 | 0 | N.A. | 0 |
| MMRN2       | 0,065128477 | -0,291133764 | 0 | N.A. | 0 |
| ASAP1       | 0,065122509 | 0,081685784  | 0 | N.A. | 0 |
| SNX14       | 0,065082191 | 0,527422879  | 0 | N.A. | 0 |
| SENP5       | 0,065050311 | 0,039927988  | 0 | N.A. | 0 |
| KIAA0319L   | 0,065029782 | 0,208895252  | 0 | N.A. | 0 |

|              |             |              |   |      |   |
|--------------|-------------|--------------|---|------|---|
| RP11-989E6.  | 0,064962405 | -0,004815863 | 0 | N.A. | 0 |
| MAP4K5       | 0,064958212 | 0,109960394  | 0 | N.A. | 0 |
| RP11-260M2   | 0,064907969 | 0,115780489  | 0 | N.A. | 0 |
| MT-CO2       | 0,064896057 | 0,287923986  | 0 | N.A. | 0 |
| CTD-2319I12  | 0,064884037 | 0,006902172  | 0 | N.A. | 0 |
| FLT1         | 0,064856718 | -0,149155506 | 0 | N.A. | 0 |
| RP4-761J14.1 | 0,064850647 | -0,006556062 | 0 | N.A. | 0 |
| RP11-48B3.4  | 0,0648044   | -0,091115448 | 0 | N.A. | 0 |
| RP11-278L15  | 0,064798677 | 0,428641447  | 0 | N.A. | 0 |
| ADAT3        | 0,064791992 | -0,032831006 | 0 | N.A. | 0 |
| CTD-2526A2.  | 0,064719864 | 0,044112527  | 0 | N.A. | 0 |
| STK24-AS1    | 0,064666272 | 0,019019831  | 0 | N.A. | 0 |
| RP11-414H17  | 0,064658581 |              | 0 | N.A. | 0 |
| LINC00885    | 0,064653714 |              | 0 | N.A. | 0 |
| SEPT7-AS1    | 0,064632104 | -0,013291952 | 0 | N.A. | 0 |
| ADO          | 0,064620557 | 0,303220984  | 0 | N.A. | 0 |
| CYP46A1      | 0,064620442 | 0,138783187  | 0 | N.A. | 0 |
| ZNF34        | 0,064613047 | -0,294831665 | 0 | N.A. | 0 |
| AC016831.7   | 0,064596538 | -0,116030328 | 0 | N.A. | 0 |
| NRN1         | 0,064536842 | -0,23391102  | 0 | N.A. | 0 |
| RP11-706O15  | 0,064531365 | -0,292624494 | 0 | N.A. | 0 |
| RP11-10K16.  | 0,064500386 | 0,044365387  | 0 | N.A. | 0 |
| RP11-457M1   | 0,064452364 | 0,069441296  | 0 | N.A. | 0 |
| VPS28        | 0,064430316 | -0,040265892 | 0 | N.A. | 0 |
| INTS1        | 0,064428036 | 0,36671861   | 0 | N.A. | 0 |
| NLRX1        | 0,064423393 | -0,136771522 | 0 | N.A. | 0 |
| ISLR         | 0,064411276 | -0,10746874  | 0 | N.A. | 0 |
| XXbac-BPG15  | 0,064372577 |              | 0 | N.A. | 0 |
| ZBED4        | 0,0643723   | 0,144435803  | 0 | N.A. | 0 |
| RP11-79O8.1  | 0,064371151 | -0,009969889 | 0 | N.A. | 0 |
| TBC1D13      | 0,064270518 | -0,172040431 | 0 | N.A. | 0 |
| RP13-890H12  | 0,064259914 | -0,149926563 | 0 | N.A. | 0 |
| ANGPT2       | 0,064178929 | 0,045729649  | 0 | N.A. | 0 |

|             |             |              |   |      |   |
|-------------|-------------|--------------|---|------|---|
| PRDM16      | 0,064128923 | 0,187465879  | 0 | N.A. | 0 |
| OSBPL10-AS1 | 0,064098359 | 0,151112512  | 0 | N.A. | 0 |
| PLAGL2      | 0,064097343 | -0,187438623 | 0 | N.A. | 0 |
| RP11-584P21 | 0,064079922 |              | 0 | N.A. | 0 |
| TSG101      | 0,064066841 | 0,371589516  | 0 | N.A. | 0 |
| CTC-459F4.1 | 0,064039149 | -0,142064896 | 0 | N.A. | 0 |
| ZNF606      | 0,06403716  | 0,155768779  | 0 | N.A. | 0 |
| LINC00589   | 0,064011829 | 0,205659038  | 0 | N.A. | 0 |
| WDFY3       | 0,064009249 | 0,280889224  | 0 | N.A. | 0 |
| POU6F2      | 0,064005304 | 0,018768785  | 0 | N.A. | 0 |
| TNFRSF10C   | 0,064004398 | -0,261236724 | 0 | N.A. | 0 |
| ZNF517      | 0,063993827 | -0,037279489 | 0 | N.A. | 0 |
| TTC6        | 0,063919622 | -0,087482772 | 0 | N.A. | 0 |
| ZNF707      | 0,063866296 | 0,098149878  | 0 | N.A. | 0 |
| RP11-92K15. | 0,063863049 | 0,110406996  | 0 | N.A. | 0 |
| MLXIP       | 0,063803828 | 0,203370241  | 0 | N.A. | 0 |
| XXbac-BPG18 | 0,063799313 | -0,202542673 | 0 | N.A. | 0 |
| ALDH1L1     | 0,063781394 | 0,08840037   | 0 | N.A. | 0 |
| CTD-2235C13 | 0,063777892 | 0,228732558  | 0 | N.A. | 0 |
| IGF2BP2-AS1 | 0,063773651 | -0,049080404 | 0 | N.A. | 0 |
| RP11-761E20 | 0,063711793 | 0,174409573  | 0 | N.A. | 0 |
| C19orf26    | 0,063708285 |              | 0 | N.A. | 0 |
| FAM71F2     | 0,063701476 | 0,314445042  | 0 | N.A. | 0 |
| FAM9C       | 0,063654007 |              | 0 | N.A. | 0 |
| GDE1        | 0,063653483 | -0,090613193 | 0 | N.A. | 0 |
| GPATCH1     | 0,06353249  | -0,036094713 | 0 | N.A. | 0 |
| RP11-474P2. | 0,063482712 | 0,385104678  | 0 | N.A. | 0 |
| STX16       | 0,063415913 | 0,038050149  | 0 | N.A. | 0 |
| ACAP3       | 0,063385518 | 0,367629617  | 0 | N.A. | 0 |
| CCL4L1      | 0,063382998 | -0,017336411 | 0 | N.A. | 0 |
| COX17       | 0,063356191 | -0,168613348 | 0 | N.A. | 0 |
| KCNJ2       | 0,063348939 | 0,068895749  | 0 | N.A. | 0 |
| ZNF140      | 0,063344673 | -0,183178226 | 0 | N.A. | 0 |

|              |             |              |   |      |   |
|--------------|-------------|--------------|---|------|---|
| RP11-32B5.7  | 0,063285006 |              | 0 | N.A. | 0 |
| RP11-47J17.2 | 0,063259456 |              | 0 | N.A. | 0 |
| CD4          | 0,063250093 | -0,039516773 | 0 | N.A. | 0 |
| C11orf45     | 0,063201346 |              | 0 | N.A. | 0 |
| RP11-410D1   | 0,063161337 | -0,107892026 | 0 | N.A. | 0 |
| YTHDC1       | 0,063130737 | 0,427429121  | 0 | N.A. | 0 |
| LGSN         | 0,063080262 | 0,107276586  | 0 | N.A. | 0 |
| NPIP5        | 0,063062883 | 0,180935372  | 0 | N.A. | 0 |
| MIB1         | 0,063053781 | 0,213360786  | 0 | N.A. | 0 |
| ZNF282       | 0,063046831 | 0,302396147  | 0 | N.A. | 0 |
| MAGIX        | 0,062997261 | -0,103316758 | 0 | N.A. | 0 |
| AMELX        | 0,062991525 |              | 0 | N.A. | 0 |
| RP11-33O4.1  | 0,062968267 | 0,184974106  | 0 | N.A. | 0 |
| RAB37        | 0,062964674 | 0,221139509  | 0 | N.A. | 0 |
| HSPA1L       | 0,062960118 | -0,188863296 | 0 | N.A. | 0 |
| ZNF266       | 0,062957158 | 0,120133932  | 0 | N.A. | 0 |
| CTBP1-AS     | 0,06294884  | -0,028052569 | 0 | N.A. | 0 |
| REPS2        | 0,062935386 | 0,162031607  | 0 | N.A. | 0 |
| LRFN4        | 0,062912837 | 0,196719111  | 0 | N.A. | 0 |
| NFATC2       | 0,062881002 | 0,281063334  | 0 | N.A. | 0 |
| SNHG18       | 0,062879263 | 0,202404279  | 0 | N.A. | 0 |
| IGHV1-2      | 0,062815633 | -0,08162501  | 0 | N.A. | 0 |
| DNAH3        | 0,062773295 | -0,075870093 | 0 | N.A. | 0 |
| BCL2         | 0,062766742 | -0,319817245 | 0 | N.A. | 0 |
| ISM2         | 0,062738545 | 0,159337532  | 0 | N.A. | 0 |
| NFASC        | 0,062717345 | -0,101117178 | 0 | N.A. | 0 |
| MIR155HG     | 0,062705164 | 0,037174111  | 0 | N.A. | 0 |
| FAM168A      | 0,062684543 | -0,060174296 | 0 | N.A. | 0 |
| PATL2        | 0,062681537 | 0,170880189  | 0 | N.A. | 0 |
| USP2         | 0,062679588 | -0,061922604 | 0 | N.A. | 0 |
| GUCY2D       | 0,062662954 | 0,084390405  | 0 | N.A. | 0 |
| RP11-141O1   | 0,062619777 |              | 0 | N.A. | 0 |
| UTY          | 0,062608808 | -0,053543498 | 0 | N.A. | 0 |

|              |                    |                    |          |             |   |
|--------------|--------------------|--------------------|----------|-------------|---|
| IGKV1-12     | 0,062596612        | 0,202197214        | 0        | N.A.        | 0 |
| RP4-665J23.1 | 0,062594534        | -0,22812405        | 0        | N.A.        | 0 |
| RP11-473I1.5 | 0,062563514        | -0,200577659       | 0        | N.A.        | 0 |
| CNOT6L       | 0,062551328        | -0,110331414       | 0        | N.A.        | 0 |
| RP11-274B21  | 0,062494857        | 0,242187566        | 0        | N.A.        | 0 |
| ZNF571       | 0,062489217        | 0,164308601        | 0        | N.A.        | 0 |
| RP11-299H21  | 0,062477655        | 0,15528828         | 0        | N.A.        | 0 |
| SYT15        | 0,062456439        | -0,124510033       | 0        | N.A.        | 0 |
| MYLPF        | 0,062442108        | -0,298097696       | 0        | N.A.        | 0 |
| LINC01125    | 0,062438857        | -0,045667918       | 0        | N.A.        | 0 |
| SPRY2        | 0,062432484        | 0,306413247        | 0        | N.A.        | 0 |
| AC104667.3   | 0,062427145        | 0,075830175        | 0        | N.A.        | 0 |
| PRX          | 0,062410451        | -0,131366599       | 0        | N.A.        | 0 |
| TMEM249      | 0,062406868        | -0,157337632       | 0        | N.A.        | 0 |
| LINC01213    | 0,062405816        | -0,264458048       | 0        | N.A.        | 0 |
| BEX5         | 0,06237728         | -0,079833697       | 0        | N.A.        | 0 |
| LA16c-444G7  | 0,062335832        | -0,137017836       | 0        | N.A.        | 0 |
| GATA6        | 0,062326562        | 0,168116253        | 0        | N.A.        | 0 |
| KLRD1        | 0,062316658        | -0,124470766       | 0        | N.A.        | 0 |
| CTD-2325P2.  | 0,062290838        |                    | 0        | N.A.        | 0 |
| MT1H         | 0,062252897        | -0,111342941       | 0        | N.A.        | 0 |
| STAP1        | 0,062237017        | -0,088758096       | 0        | N.A.        | 0 |
| <b>KCNN4</b> | <b>0,062231401</b> | <b>0,478891023</b> | <b>1</b> | <b>none</b> | 0 |
| WNT5A        | 0,062167216        | 0,029874313        | 0        | N.A.        | 0 |
| WBP2NL       | 0,062158071        | 0,020743421        | 0        | N.A.        | 0 |
| RP11-57A1.1  | 0,062117505        |                    | 0        | N.A.        | 0 |
| ING3         | 0,062096313        | -0,243593299       | 0        | N.A.        | 0 |
| RP11-35G9.3  | 0,062055908        | 0,111788104        | 0        | N.A.        | 0 |
| TINF2        | 0,062047358        | -0,052833381       | 0        | N.A.        | 0 |
| ZSCAN20      | 0,062030093        | 0,078943372        | 0        | N.A.        | 0 |
| MARCH1       | 0,062023631        | -0,358556114       | 0        | N.A.        | 0 |
| RP11-365H22  | 0,061999977        | 0,356095881        | 0        | N.A.        | 0 |
| ABHD16A      | 0,061932705        | -0,227006042       | 0        | N.A.        | 0 |

|              |             |              |   |      |   |
|--------------|-------------|--------------|---|------|---|
| STMN4        | 0,061919115 | 0,034357583  | 0 | N.A. | 0 |
| LINC00964    | 0,061914709 |              | 0 | N.A. | 0 |
| ACSM1        | 0,061892725 | -0,131419833 | 0 | N.A. | 0 |
| ZNF624       | 0,061891547 | -0,115200358 | 0 | N.A. | 0 |
| ANKHD1-EIF4  | 0,061882532 | 0,029022788  | 0 | N.A. | 0 |
| ATP2A3       | 0,061844909 | 0,037390073  | 0 | N.A. | 0 |
| DDR2         | 0,061841249 | 0,00644587   | 0 | N.A. | 0 |
| RP11-635N19  | 0,061816847 | 0,173555269  | 0 | N.A. | 0 |
| ZNF471       | 0,061814568 | 0,185056462  | 0 | N.A. | 0 |
| SMG5         | 0,061805784 | 0,227659347  | 0 | N.A. | 0 |
| GRIK2        | 0,061789108 |              | 0 | N.A. | 0 |
| RP11-38L15.1 | 0,061762397 | -0,06289385  | 0 | N.A. | 0 |
| ASPHD2       | 0,061660393 | 0,366113771  | 0 | N.A. | 0 |
| PCDHB13      | 0,061589052 | 0,315446797  | 0 | N.A. | 0 |
| HOXD10       | 0,061586054 | 0,123909979  | 0 | N.A. | 0 |
| ITGAL        | 0,061584003 | 0,060026507  | 0 | N.A. | 0 |
| RP11-709A23  | 0,061566543 |              | 0 | N.A. | 0 |
| TCP11L1      | 0,061561292 | 0,009911015  | 0 | N.A. | 0 |
| RP11-20G13.1 | 0,061546421 | 0,315932116  | 0 | N.A. | 0 |
| RP11-16K12.1 | 0,061441381 |              | 0 | N.A. | 0 |
| RP13-192B19  | 0,061441026 | -0,094570511 | 0 | N.A. | 0 |
| RBM14-RBM14  | 0,061434003 |              | 0 | N.A. | 0 |
| FAM206A      | 0,061424018 | -0,069640854 | 0 | N.A. | 0 |
| C6orf47      | 0,061387835 | 0,223534153  | 0 | N.A. | 0 |
| PTPN7        | 0,061366151 | -0,230766425 | 0 | N.A. | 0 |
| GRM7         | 0,061363625 | -0,149720762 | 0 | N.A. | 0 |
| AC245100.1   | 0,061346573 | 0,016123831  | 0 | N.A. | 0 |
| TRPV2        | 0,061316249 | 0,168655484  | 0 | N.A. | 0 |
| CH507-9B2.9  | 0,061302585 | -0,027301095 | 0 | N.A. | 0 |
| NBEA         | 0,061268247 | 0,098859539  | 0 | N.A. | 0 |
| HIVEP3       | 0,061240811 | 0,048256535  | 0 | N.A. | 0 |
| ARID1A       | 0,061225119 | 0,404492992  | 0 | N.A. | 0 |
| MYBPC3       | 0,061143878 | -0,006546293 | 0 | N.A. | 0 |

|              |             |              |   |      |   |
|--------------|-------------|--------------|---|------|---|
| POSTN        | 0,061080539 | -0,123856803 | 0 | N.A. | 0 |
| OSBPL5       | 0,061076728 | 0,25722085   | 0 | N.A. | 0 |
| RP11-51J9.6  | 0,061056543 | 0,255524516  | 0 | N.A. | 0 |
| DNAJC27-AS1  | 0,061048366 | 0,006827928  | 0 | N.A. | 0 |
| PLEKHS1      | 0,061041776 | -0,046459506 | 0 | N.A. | 0 |
| TRIM11       | 0,061027299 | 0,146635881  | 0 | N.A. | 0 |
| RAB38        | 0,061017223 | -0,053305005 | 0 | N.A. | 0 |
| LINC00282    | 0,060970086 | 0,142284428  | 0 | N.A. | 0 |
| ZNF776       | 0,060938877 | 0,297211665  | 0 | N.A. | 0 |
| PWWP2A       | 0,060873513 | -0,030551037 | 0 | N.A. | 0 |
| RP1-45I4.3   | 0,060795804 | 0,145193926  | 0 | N.A. | 0 |
| CDIP1        | 0,06076203  | -0,043738562 | 0 | N.A. | 0 |
| CCNJ         | 0,060761256 | 0,137320512  | 0 | N.A. | 0 |
| RP11-661P17  | 0,060759143 | 0,024211582  | 0 | N.A. | 0 |
| IGLV1-44     | 0,060749142 | -0,195763393 | 0 | N.A. | 0 |
| RP11-455F5.4 | 0,060739631 | -0,060307131 | 0 | N.A. | 0 |
| SYNE3        | 0,060675368 | -0,033547877 | 0 | N.A. | 0 |
| TMC8         | 0,06066222  | 0,321393478  | 0 | N.A. | 0 |
| ZNF148       | 0,060625059 | 0,140966863  | 0 | N.A. | 0 |
| USH1G        | 0,060596875 |              | 0 | N.A. | 0 |
| LINC01063    | 0,06053195  | -0,10699011  | 0 | N.A. | 0 |
| CTD-3222D19  | 0,060527157 | 0,157195292  | 0 | N.A. | 0 |
| H2AFJ        | 0,060512132 | 0,034082634  | 0 | N.A. | 0 |
| AC113617.1   | 0,060501733 | 0,450226896  | 0 | N.A. | 0 |
| CAMKK2       | 0,060417284 | 0,158353858  | 0 | N.A. | 0 |
| OGFR-AS1     | 0,060407738 |              | 0 | N.A. | 0 |
| ZBTB40       | 0,06039031  | 0,140432253  | 0 | N.A. | 0 |
| C10orf25     | 0,06037542  | -0,014702695 | 0 | N.A. | 0 |
| ARSH         | 0,060343625 | 0,137780765  | 0 | N.A. | 0 |
| GNA12        | 0,060335884 | -0,25994647  | 0 | N.A. | 0 |
| ARF3         | 0,060246394 | 0,562077251  | 0 | N.A. | 0 |
| C7           | 0,060227643 | -0,113860331 | 0 | N.A. | 0 |
| ANKRD23      | 0,060225666 | -0,033125607 | 0 | N.A. | 0 |



|             |             |              |   |      |   |
|-------------|-------------|--------------|---|------|---|
| KCNK17      | 0,060216872 |              | 0 | N.A. | 0 |
| RP11-28H5.2 | 0,060214439 | -0,062544707 | 0 | N.A. | 0 |
| TNFRSF4     | 0,060211558 | -0,151567731 | 0 | N.A. | 0 |
| FNDC1       | 0,060205199 |              | 0 | N.A. | 0 |
| RP11-2B6.3  | 0,060203111 | -0,001263896 | 0 | N.A. | 0 |
| RP11-83M16  | 0,060163117 |              | 0 | N.A. | 0 |
| RP1-261D10. | 0,060140859 | -0,290855772 | 0 | N.A. | 0 |
| RP11-524O1. | 0,060044388 |              | 0 | N.A. | 0 |
| DLG4        | 0,060022562 | -0,214676653 | 0 | N.A. | 0 |
| FEZ1        | 0,06000996  |              | 0 | N.A. | 0 |
| ST3GAL2     | 0,059994895 | 0,192625549  | 0 | N.A. | 0 |
| PEX12       | 0,059986585 | -0,054099605 | 0 | N.A. | 0 |
| MTRNR2L11   | 0,059947108 | -0,026219658 | 0 | N.A. | 0 |
| RP11-90B9.3 | 0,059916344 |              | 0 | N.A. | 0 |
| NPFFR1      | 0,05987262  | -0,097793087 | 0 | N.A. | 0 |
| RP11-439E19 | 0,059860564 | 0,201430451  | 0 | N.A. | 0 |
| COG1        | 0,059839837 | 0,233633     | 0 | N.A. | 0 |
| RP3-522J7.7 | 0,059835117 |              | 0 | N.A. | 0 |
| RP11-156K23 | 0,059831239 | 0,038234268  | 0 | N.A. | 0 |
| RP11-157P1. | 0,05982569  | 0,163636511  | 0 | N.A. | 0 |
| ZNF785      | 0,059723129 | 0,039254974  | 0 | N.A. | 0 |
| RP1-317E23. | 0,059682497 | -0,043563554 | 0 | N.A. | 0 |
| OSGIN2      | 0,059663979 | 0,091758648  | 0 | N.A. | 0 |
| METTL4      | 0,059659572 | -0,013266688 | 0 | N.A. | 0 |
| PIK3R4      | 0,05965518  | 0,218802735  | 0 | N.A. | 0 |
| CTB-147N14. | 0,059610248 | -0,188103969 | 0 | N.A. | 0 |
| CTB-25B13.5 | 0,05955417  | -0,220272986 | 0 | N.A. | 0 |
| TET3        | 0,059547023 | 0,124131417  | 0 | N.A. | 0 |
| PLBD2       | 0,059517994 | 0,097671364  | 0 | N.A. | 0 |
| ZNF469      | 0,059473255 | 0,143826072  | 0 | N.A. | 0 |
| FAM120A     | 0,059470548 | 0,218283266  | 0 | N.A. | 0 |
| XBP1        | 0,05944021  | 0,051046832  | 0 | N.A. | 0 |
| RTP4        | 0,059407989 | 0,047399063  | 0 | N.A. | 0 |

|             |             |              |   |      |   |
|-------------|-------------|--------------|---|------|---|
| RP11-69E11. | 0,0593884   | -0,123448445 | 0 | N.A. | 0 |
| IKZF5       | 0,059357927 | 0,013669278  | 0 | N.A. | 0 |
| OCIAD2      | 0,059246424 | 0,240959564  | 0 | N.A. | 0 |
| B3GALNT2    | 0,059246287 | -0,08658514  | 0 | N.A. | 0 |
| DOCK8       | 0,059181476 | -0,122414467 | 0 | N.A. | 0 |
| RP1-151F17. | 0,05915892  | 0,040993305  | 0 | N.A. | 0 |
| SYT13       | 0,059138419 | 0,127298534  | 0 | N.A. | 0 |
| AP001055.6  | 0,059070952 |              | 0 | N.A. | 0 |
| WDR93       | 0,059057871 | -0,071614951 | 0 | N.A. | 0 |
| VWDE        | 0,059044367 | -0,189198108 | 0 | N.A. | 0 |
| CTC-526N19. | 0,059018471 |              | 0 | N.A. | 0 |
| PRKAR2A-AS  | 0,059015736 | 0,471308692  | 0 | N.A. | 0 |
| ZMYND10     | 0,058948742 | -0,004950152 | 0 | N.A. | 0 |
| CCDC159     | 0,058881096 | 0,12705033   | 0 | N.A. | 0 |
| A1BG        | 0,058868861 | -0,061307593 | 0 | N.A. | 0 |
| AC002331.1  | 0,058845279 |              | 0 | N.A. | 0 |
| HRC         | 0,058806804 | 0,069958372  | 0 | N.A. | 0 |
| PIP5K1A     | 0,058754875 | 0,289304475  | 0 | N.A. | 0 |
| EGR2        | 0,058746668 | -0,13582997  | 0 | N.A. | 0 |
| CAMK2G      | 0,058745211 | 0,505029918  | 0 | N.A. | 0 |
| GSDMA       | 0,05870715  | 0,014019132  | 0 | N.A. | 0 |
| NBPF9       | 0,058699641 | 0,244270781  | 0 | N.A. | 0 |
| RP5-1112D6. | 0,058696195 | 0,16016409   | 0 | N.A. | 0 |
| RP3-402G11. | 0,058667288 |              | 0 | N.A. | 0 |
| LINC00852   | 0,058586242 | -0,195954362 | 0 | N.A. | 0 |
| ZBTB6       | 0,058504874 | 0,333306414  | 0 | N.A. | 0 |
| DNAAF1      | 0,058470942 | 0,269266402  | 0 | N.A. | 0 |
| SEMA3D      | 0,058451865 | 0,055840399  | 0 | N.A. | 0 |
| PAX8        | 0,058444862 | 0,523013926  | 0 | N.A. | 0 |
| RAB6C       | 0,058429619 | 0,064918745  | 0 | N.A. | 0 |
| CD96        | 0,05840909  | -0,164773143 | 0 | N.A. | 0 |
| FAM103A1    | 0,058402966 | 0,096539663  | 0 | N.A. | 0 |
| PLEKHG5     | 0,058392641 | 0,04296927   | 0 | N.A. | 0 |

|              |             |              |   |      |   |
|--------------|-------------|--------------|---|------|---|
| RP11-173D3.  | 0,058364362 | -0,106308259 | 0 | N.A. | 0 |
| RP11-73E17.  | 0,058336777 | 0,019929879  | 0 | N.A. | 0 |
| NFIB         | 0,058309382 | 0,092129757  | 0 | N.A. | 0 |
| XXyac-YRM2   | 0,058285145 | 0,069114157  | 0 | N.A. | 0 |
| AP000569.9   | 0,058274965 | -0,229081613 | 0 | N.A. | 0 |
| PSAPL1       | 0,058177018 | 0,317188132  | 0 | N.A. | 0 |
| SUPT7L       | 0,058157564 | 0,016937256  | 0 | N.A. | 0 |
| RP11-138I1.4 | 0,058156385 | 0,07203622   | 0 | N.A. | 0 |
| TSNAXIP1     | 0,058123865 | -0,036318479 | 0 | N.A. | 0 |
| AC022201.5   | 0,058113799 | 0,088917406  | 0 | N.A. | 0 |
| LA16c-358B7  | 0,058100614 | 0,304325948  | 0 | N.A. | 0 |
| LINC00936    | 0,058090657 | 0,089142067  | 0 | N.A. | 0 |
| AK4          | 0,058080656 | -0,081284662 | 0 | N.A. | 0 |
| ZEB2         | 0,058078722 | -0,099308663 | 0 | N.A. | 0 |
| CTD-3203P2.  | 0,05807545  | 0,05849693   | 0 | N.A. | 0 |
| RP11-59H7.4  | 0,058068476 | 0,104248432  | 0 | N.A. | 0 |
| LST1         | 0,058067758 | -0,269286494 | 0 | N.A. | 0 |
| PPM1K        | 0,05805389  | 0,126959213  | 0 | N.A. | 0 |
| SLX1B        | 0,058023598 | 0,188714191  | 0 | N.A. | 0 |
| LINC01235    | 0,058020034 | -0,08448119  | 0 | N.A. | 0 |
| R3HCC1L      | 0,057967822 | 0,16924788   | 0 | N.A. | 0 |
| CITED2       | 0,057935916 | -0,115376996 | 0 | N.A. | 0 |
| TBC1D2       | 0,05789192  | 0,356636267  | 0 | N.A. | 0 |
| MUC5B        | 0,057881941 | 0,302503591  | 0 | N.A. | 0 |
| FCER1A       | 0,05787754  | 0,04508128   | 0 | N.A. | 0 |
| KCNQ3        | 0,057820085 | 0,126171716  | 0 | N.A. | 0 |
| SYN1         | 0,057782807 | 0,030285053  | 0 | N.A. | 0 |
| FUT1         | 0,057773396 | 0,393055431  | 0 | N.A. | 0 |
| CCL20        | 0,057716686 | 0,152124846  | 0 | N.A. | 0 |
| RP11-410E4.  | 0,057686963 | 0,013597035  | 0 | N.A. | 0 |
| LINC00174    | 0,057679021 | 0,076910274  | 0 | N.A. | 0 |
| KCNAB2       | 0,05766529  | -0,052724913 | 0 | N.A. | 0 |
| RP11-347C12  | 0,057662467 | -0,113143582 | 0 | N.A. | 0 |

|             |             |              |   |      |   |
|-------------|-------------|--------------|---|------|---|
| PRR36       | 0,057548142 | -0,234250767 | 0 | N.A. | 0 |
| RP11-588G2  | 0,057524458 |              | 0 | N.A. | 0 |
| SACS        | 0,057441377 | -0,094894146 | 0 | N.A. | 0 |
| HSPB9       | 0,057430473 | 0,199574479  | 0 | N.A. | 0 |
| H2BFS       | 0,057420936 | 0,224579517  | 0 | N.A. | 0 |
| SLC2A9      | 0,057407251 | -0,095707156 | 0 | N.A. | 0 |
| FUOM        | 0,057395452 | 0,258651408  | 0 | N.A. | 0 |
| ALPL        | 0,057378213 |              | 0 | N.A. | 0 |
| SIAH2       | 0,057366604 | 0,433657568  | 0 | N.A. | 0 |
| TM9SF2      | 0,057311406 | 0,452211306  | 0 | N.A. | 0 |
| ZCWPW1      | 0,057271049 | 0,165848882  | 0 | N.A. | 0 |
| ZNF669      | 0,057256819 | -0,172033363 | 0 | N.A. | 0 |
| SFRP5       | 0,057253947 | -0,038892696 | 0 | N.A. | 0 |
| BTBD16      | 0,057230733 | -0,176593091 | 0 | N.A. | 0 |
| CSNK2A3     | 0,057226657 | -0,167126952 | 0 | N.A. | 0 |
| TMEM238     | 0,057200305 | 0,083214473  | 0 | N.A. | 0 |
| RP11-247A12 | 0,057182308 |              | 0 | N.A. | 0 |
| FABP4       | 0,057160086 | -0,200089191 | 0 | N.A. | 0 |
| LINC01389   | 0,057142949 | -0,134553708 | 0 | N.A. | 0 |
| DEPDC5      | 0,057056336 | -0,2669948   | 0 | N.A. | 0 |
| RP11-66D17. | 0,057041458 |              | 0 | N.A. | 0 |
| TMBIM4      | 0,057040333 | 0,159848669  | 0 | N.A. | 0 |
| RP11-148B18 | 0,057029998 |              | 0 | N.A. | 0 |
| MYH15       | 0,057021601 | 0,021272307  | 0 | N.A. | 0 |
| HS3ST5      | 0,056993214 |              | 0 | N.A. | 0 |
| RAPGEF5     | 0,056973692 | 0,131620772  | 0 | N.A. | 0 |
| RP11-532F6. | 0,056941291 | -0,346059454 | 0 | N.A. | 0 |
| ALDH3B2     | 0,0569377   | -0,14684882  | 0 | N.A. | 0 |
| AGAP3       | 0,056899558 | 0,523352536  | 0 | N.A. | 0 |
| C19orf12    | 0,056886313 | -0,073663808 | 0 | N.A. | 0 |
| CTC-505O3.3 | 0,056884769 |              | 0 | N.A. | 0 |
| GPR114      | 0,05686655  | 0,04753496   | 0 | N.A. | 0 |
| KAAG1       | 0,056864259 | 0,182492503  | 0 | N.A. | 0 |

|              |             |              |   |      |   |
|--------------|-------------|--------------|---|------|---|
| CTD-2357A8.  | 0,056829259 | 0,313936128  | 0 | N.A. | 0 |
| LINC00957    | 0,056811579 | -0,067158873 | 0 | N.A. | 0 |
| TBC1D3B      | 0,056804543 | 0,006800455  | 0 | N.A. | 0 |
| TBC1D24      | 0,056715188 | -0,130044864 | 0 | N.A. | 0 |
| RAD54L2      | 0,056684473 | 0,349179503  | 0 | N.A. | 0 |
| SLC35A1      | 0,056674927 | 0,616231714  | 0 | N.A. | 0 |
| RP11-452L6.1 | 0,056663898 | 0,181055189  | 0 | N.A. | 0 |
| YPEL1        | 0,056659739 | -0,067353104 | 0 | N.A. | 0 |
| SIPA1L1      | 0,056647654 | 0,307885366  | 0 | N.A. | 0 |
| SYCP3        | 0,056615393 | -0,140262974 | 0 | N.A. | 0 |
| S100A7       | 0,056589742 |              | 0 | N.A. | 0 |
| CTB-171A8.1  | 0,056563108 | 0,076257672  | 0 | N.A. | 0 |
| RPGR         | 0,056518107 | -0,009950017 | 0 | N.A. | 0 |
| PROCA1       | 0,056505879 | -0,144039735 | 0 | N.A. | 0 |
| RP11-368I7.4 | 0,056491381 | 0,026984199  | 0 | N.A. | 0 |
| GIMAP1       | 0,056440552 | 0,049897452  | 0 | N.A. | 0 |
| HLX          | 0,056429423 | -0,131554054 | 0 | N.A. | 0 |
| THBS3        | 0,056418946 | 0,262870953  | 0 | N.A. | 0 |
| ANKFY1       | 0,056346063 | 0,247962044  | 0 | N.A. | 0 |
| AVEN         | 0,056345352 | 0,213997541  | 0 | N.A. | 0 |
| RP11-582J16  | 0,056344422 | -0,047778209 | 0 | N.A. | 0 |
| RAMP2-AS1    | 0,056317458 | 0,027449584  | 0 | N.A. | 0 |
| SH2D4B       | 0,056219031 |              | 0 | N.A. | 0 |
| TRIM10       | 0,056198029 | 0,15027476   | 0 | N.A. | 0 |
| MMP24        | 0,056181624 | -0,099716427 | 0 | N.A. | 0 |
| LINC00921    | 0,056178029 | 0,015935306  | 0 | N.A. | 0 |
| PAXIP1-AS2   | 0,056177176 | 0,196083372  | 0 | N.A. | 0 |
| WNT5B        | 0,056161696 | -0,272199332 | 0 | N.A. | 0 |
| ZNF503-AS2   | 0,056150796 | 0,001613086  | 0 | N.A. | 0 |
| GLI2         | 0,056143163 | 0,155621685  | 0 | N.A. | 0 |
| SP110        | 0,056133897 | 0,457404707  | 0 | N.A. | 0 |
| LINC01220    | 0,056101035 | 0,295231285  | 0 | N.A. | 0 |
| NLGN3        | 0,056087306 | 0,005447437  | 0 | N.A. | 0 |

|             |             |              |   |      |   |
|-------------|-------------|--------------|---|------|---|
| ATAD2B      | 0,056046267 | 0,069166828  | 0 | N.A. | 0 |
| RP11-429J17 | 0,056036835 | -0,118645652 | 0 | N.A. | 0 |
| AFF3        | 0,056012808 | -0,085913398 | 0 | N.A. | 0 |
| FBXO27      | 0,055979302 | -0,02882133  | 0 | N.A. | 0 |
| TIRAP       | 0,055927209 | -0,077405548 | 0 | N.A. | 0 |
| PRORY       | 0,05592205  | -0,012712    | 0 | N.A. | 0 |
| BDNF-AS     | 0,055910764 | -0,266262945 | 0 | N.A. | 0 |
| MYDGF       | 0,055858287 | 0,42362438   | 0 | N.A. | 0 |
| ESRP1       | 0,055843703 | 0,218650748  | 0 | N.A. | 0 |
| CD19        | 0,055829094 | -0,13135768  | 0 | N.A. | 0 |
| CASQ2       | 0,055783142 |              | 0 | N.A. | 0 |
| GLCC1       | 0,055719921 | 0,121505787  | 0 | N.A. | 0 |
| KLHL26      | 0,055662458 | 0,200361868  | 0 | N.A. | 0 |
| WDR66       | 0,055650393 | 0,036794947  | 0 | N.A. | 0 |
| MMP19       | 0,055622335 | 0,152405915  | 0 | N.A. | 0 |
| PRR12       | 0,055619588 | 0,123060671  | 0 | N.A. | 0 |
| ZFP36L2     | 0,055615794 | 0,286906475  | 0 | N.A. | 0 |
| BTLA        | 0,055601236 | -0,121317344 | 0 | N.A. | 0 |
| XX-C2158C12 | 0,055551499 | -0,035386973 | 0 | N.A. | 0 |
| AC093627.10 | 0,055533285 | 0,212485704  | 0 | N.A. | 0 |
| RP11-87C12. | 0,055508262 | 0,260988349  | 0 | N.A. | 0 |
| SRRM2-AS1   | 0,05547091  | -0,091927807 | 0 | N.A. | 0 |
| ZSCAN29     | 0,05546387  | 0,058023495  | 0 | N.A. | 0 |
| TTR         | 0,055445989 | 0,106137431  | 0 | N.A. | 0 |
| PLIN5       | 0,05538915  |              | 0 | N.A. | 0 |
| GPR98       | 0,055353096 | 0,057652132  | 0 | N.A. | 0 |
| INSRR       | 0,055301405 |              | 0 | N.A. | 0 |
| LMNA        | 0,055268802 | 0,496755795  | 0 | N.A. | 0 |
| DOCK10      | 0,055246217 | -0,061738955 | 0 | N.A. | 0 |
| PTPN18      | 0,055243042 | 0,315995013  | 0 | N.A. | 0 |
| C16orf45    | 0,055207324 |              | 0 | N.A. | 0 |
| ZNF317      | 0,055163499 | -0,381844194 | 0 | N.A. | 0 |
| RBM7        | 0,055138314 | 0,109570808  | 0 | N.A. | 0 |

|              |             |              |   |      |   |
|--------------|-------------|--------------|---|------|---|
| TMEM245      | 0,055127871 | 0,422943208  | 0 | N.A. | 0 |
| UBE2W        | 0,055115246 | 0,411669274  | 0 | N.A. | 0 |
| S1PR1        | 0,055095173 | 0,117471666  | 0 | N.A. | 0 |
| SPRED2       | 0,055043854 | 0,512954025  | 0 | N.A. | 0 |
| SLC23A3      | 0,055041265 | 0,416128947  | 0 | N.A. | 0 |
| AC124944.3   | 0,054999241 | -0,009338369 | 0 | N.A. | 0 |
| RP11-312B8.  | 0,054967686 | 0,172194348  | 0 | N.A. | 0 |
| PTPLAD2      | 0,054885667 | -0,303523254 | 0 | N.A. | 0 |
| RP11-659E9.  | 0,054879872 |              | 0 | N.A. | 0 |
| SLC1A7       | 0,054874144 | -0,01435015  | 0 | N.A. | 0 |
| MKRN1        | 0,054851411 | 0,21285081   | 0 | N.A. | 0 |
| CAPRIN2      | 0,054849574 | 0,250878105  | 0 | N.A. | 0 |
| C17orf59     | 0,054835063 | 0,188164785  | 0 | N.A. | 0 |
| DCX          | 0,054831845 |              | 0 | N.A. | 0 |
| TRPT1        | 0,054822439 | 0,12782185   | 0 | N.A. | 0 |
| ANKK1        | 0,054638547 | 0,361544813  | 0 | N.A. | 0 |
| CABP4        | 0,054600421 | -0,004145188 | 0 | N.A. | 0 |
| CSTF3-AS1    | 0,054563419 |              | 0 | N.A. | 0 |
| RP11-347I19  | 0,054547775 | -0,094817802 | 0 | N.A. | 0 |
| COL4A1       | 0,054545084 | -0,118203212 | 0 | N.A. | 0 |
| LTB4R2       | 0,054538389 | 0,084125848  | 0 | N.A. | 0 |
| RP11-298I3.4 | 0,054483168 | -0,118301073 | 0 | N.A. | 0 |
| SEC24C       | 0,054473239 | 0,431397919  | 0 | N.A. | 0 |
| RBM4         | 0,054439278 | 0,188671852  | 0 | N.A. | 0 |
| VPS13B       | 0,054392514 | 0,056797349  | 0 | N.A. | 0 |
| NAT8         | 0,054370548 |              | 0 | N.A. | 0 |
| C8orf34      | 0,054351938 | -0,072499956 | 0 | N.A. | 0 |
| C5orf56      | 0,054323162 | 0,349026393  | 0 | N.A. | 0 |
| XX-C2158C6.  | 0,054292218 | -0,076256617 | 0 | N.A. | 0 |
| RP11-327P2.  | 0,054267564 | 0,166842721  | 0 | N.A. | 0 |
| PIGV         | 0,05423965  | 0,22135539   | 0 | N.A. | 0 |
| KIAA0319     | 0,054232596 | 0,258453833  | 0 | N.A. | 0 |
| ACYP2        | 0,054188781 | -0,004842868 | 0 | N.A. | 0 |

|             |             |              |   |      |   |
|-------------|-------------|--------------|---|------|---|
| BLOC1S3     | 0,054164754 | -0,121566478 | 0 | N.A. | 0 |
| NBPF8       | 0,054140784 | 0,124635856  | 0 | N.A. | 0 |
| FLNB-AS1    | 0,054131625 |              | 0 | N.A. | 0 |
| IGHA2       | 0,054125387 | 0,001583657  | 0 | N.A. | 0 |
| LA16c-OS12. | 0,054089108 | 0,030822837  | 0 | N.A. | 0 |
| RP11-308D13 | 0,054072907 | 0,32078436   | 0 | N.A. | 0 |
| HSD11B1L    | 0,054060414 | -0,06188656  | 0 | N.A. | 0 |
| ASB7        | 0,054038504 | 0,039054211  | 0 | N.A. | 0 |
| CTD-2270P14 | 0,054038131 | -0,112796844 | 0 | N.A. | 0 |
| RHEBL1      | 0,054037006 | -0,079803907 | 0 | N.A. | 0 |
| AC023481.1  | 0,054002825 | 0,068922956  | 0 | N.A. | 0 |
| GPR176      | 0,053995705 |              | 0 | N.A. | 0 |
| ST6GALNAC4  | 0,053985456 | -0,130532428 | 0 | N.A. | 0 |
| PCDHGA5     | 0,053920268 | 0,101905316  | 0 | N.A. | 0 |
| BBS10       | 0,053917681 | 0,190163373  | 0 | N.A. | 0 |
| TVP23C      | 0,053915147 | 0,136793578  | 0 | N.A. | 0 |
| MPND        | 0,05389663  | 0,159631755  | 0 | N.A. | 0 |
| FOXH1       | 0,053896469 | -0,204226797 | 0 | N.A. | 0 |
| CTD-2588E21 | 0,053874781 |              | 0 | N.A. | 0 |
| LOXL2       | 0,053855136 | -0,117483588 | 0 | N.A. | 0 |
| RP11-231E6. | 0,053854238 | -0,022830712 | 0 | N.A. | 0 |
| ABCC8       | 0,053807539 | 0,003951785  | 0 | N.A. | 0 |
| TEKT2       | 0,053786247 |              | 0 | N.A. | 0 |
| RP11-1379J2 | 0,053715037 | 0,475524155  | 0 | N.A. | 0 |
| CRAMP1L     | 0,053663984 | 0,179419545  | 0 | N.A. | 0 |
| LRRC75A     | 0,053636553 | -0,123167596 | 0 | N.A. | 0 |
| UPK1B       | 0,053619188 |              | 0 | N.A. | 0 |
| FAS         | 0,053618987 | 0,126328965  | 0 | N.A. | 0 |
| GAA         | 0,053600685 | 0,325170163  | 0 | N.A. | 0 |
| STC2        | 0,053583948 | 0,17162841   | 0 | N.A. | 0 |
| TBCEL       | 0,053582354 | -0,069462898 | 0 | N.A. | 0 |
| NTRK2       | 0,053522129 | -0,018725601 | 0 | N.A. | 0 |
| ELAVL3      | 0,05349791  |              | 0 | N.A. | 0 |



|               |             |              |   |      |   |
|---------------|-------------|--------------|---|------|---|
| LINC01118     | 0,053487224 |              | 0 | N.A. | 0 |
| C7orf65       | 0,053486439 |              | 0 | N.A. | 0 |
| ACBD4         | 0,053481941 | 0,009453385  | 0 | N.A. | 0 |
| FKBP6         | 0,053478963 |              | 0 | N.A. | 0 |
| FOXD4         | 0,05347139  | 0,072225576  | 0 | N.A. | 0 |
| PLEKHA3       | 0,05346464  | -0,148337041 | 0 | N.A. | 0 |
| COL4A4        | 0,053456725 |              | 0 | N.A. | 0 |
| RP3-455J7.4   | 0,053452134 |              | 0 | N.A. | 0 |
| ADCY5         | 0,0534451   |              | 0 | N.A. | 0 |
| MAPK14        | 0,053427292 | 0,038599098  | 0 | N.A. | 0 |
| MAMDC2-AS     | 0,053420887 |              | 0 | N.A. | 0 |
| CACNG8        | 0,053395641 | 0,259038566  | 0 | N.A. | 0 |
| RP5-1198O2.0  | 0,053369229 | -0,212217861 | 0 | N.A. | 0 |
| ZNF644        | 0,053354763 | 0,316510425  | 0 | N.A. | 0 |
| SASH3         | 0,053348246 | -0,200949039 | 0 | N.A. | 0 |
| CEP85         | 0,053340089 | -0,016619984 | 0 | N.A. | 0 |
| RP11-143E21.1 | 0,053301622 |              | 0 | N.A. | 0 |
| SNAP29        | 0,053282697 | 0,034901295  | 0 | N.A. | 0 |
| CFAP69        | 0,053279162 | 0,003379281  | 0 | N.A. | 0 |
| SYDE1         | 0,053256978 |              | 0 | N.A. | 0 |
| CHST6         | 0,053231674 | 0,327092491  | 0 | N.A. | 0 |
| RP6-201G10.1  | 0,053201084 | 0,097576683  | 0 | N.A. | 0 |
| MBOAT1        | 0,053197511 | 0,372071341  | 0 | N.A. | 0 |
| C1orf220      | 0,053195622 | 0,014512399  | 0 | N.A. | 0 |
| RP11-404F10.1 | 0,053185431 | -0,122946027 | 0 | N.A. | 0 |
| RP11-575I8.1  | 0,053178535 | 0,017552871  | 0 | N.A. | 0 |
| XXyac-YX155   | 0,053164719 | -0,0073352   | 0 | N.A. | 0 |
| CYB5D2        | 0,053162415 | 0,298959405  | 0 | N.A. | 0 |
| CTD-2047H1.1  | 0,053147725 | 0,085881369  | 0 | N.A. | 0 |
| MUT           | 0,053138372 | 0,002886729  | 0 | N.A. | 0 |
| RP11-556N4.1  | 0,053121414 | 0,31086417   | 0 | N.A. | 0 |
| ZNF69         | 0,05311995  | -0,235693268 | 0 | N.A. | 0 |
| RP5-903G2.2   | 0,053119158 | 0,004647869  | 0 | N.A. | 0 |

|              |             |              |   |      |   |
|--------------|-------------|--------------|---|------|---|
| RP11-65N13   | 0,053096632 | 0,023901053  | 0 | N.A. | 0 |
| ZFP82        | 0,053080655 | 0,171215731  | 0 | N.A. | 0 |
| MYO7A        | 0,053044739 | 0,156607009  | 0 | N.A. | 0 |
| FAM85B       | 0,053037487 | 0,080849133  | 0 | N.A. | 0 |
| RP3-399L15.3 | 0,052975639 | 0,271115107  | 0 | N.A. | 0 |
| RP11-863P13  | 0,052970658 |              | 0 | N.A. | 0 |
| RP11-531F16  | 0,052969608 | -0,065782525 | 0 | N.A. | 0 |
| CD86         | 0,052956957 | 0,056952241  | 0 | N.A. | 0 |
| CALB2        | 0,052946964 | -0,390554056 | 0 | N.A. | 0 |
| RP11-159F24  | 0,05292402  | -0,160912935 | 0 | N.A. | 0 |
| ZNF134       | 0,052908822 | -0,249024777 | 0 | N.A. | 0 |
| PRR14L       | 0,052893519 | 0,235371643  | 0 | N.A. | 0 |
| TNRC6A       | 0,052886448 | 0,242630878  | 0 | N.A. | 0 |
| GOLGA8A      | 0,052876793 | 0,319802461  | 0 | N.A. | 0 |
| RP11-15A1.3  | 0,052854698 | 0,004895027  | 0 | N.A. | 0 |
| ADAMTS13     | 0,052852238 | 0,266278829  | 0 | N.A. | 0 |
| MYLIP        | 0,052821441 | 0,26828488   | 0 | N.A. | 0 |
| RP11-1379J2  | 0,052818277 | -0,199085312 | 0 | N.A. | 0 |
| IL1RL2       | 0,052770291 | -0,034769699 | 0 | N.A. | 0 |
| SKOR1        | 0,052736903 | 0,019448887  | 0 | N.A. | 0 |
| RIMS2        | 0,052718404 | 0,056769571  | 0 | N.A. | 0 |
| WDR48        | 0,05270767  | -0,158348142 | 0 | N.A. | 0 |
| TMED5        | 0,052694979 | -0,109481548 | 0 | N.A. | 0 |
| SPG20        | 0,052664519 | 0,03628003   | 0 | N.A. | 0 |
| MGP          | 0,052662295 | -0,138174718 | 0 | N.A. | 0 |
| RASAL2-AS1   | 0,052658868 | 0,097348812  | 0 | N.A. | 0 |
| TMTC3        | 0,052643714 | 0,088632185  | 0 | N.A. | 0 |
| MYO1G        | 0,052632736 | -0,032198832 | 0 | N.A. | 0 |
| LMOD3        | 0,052614923 | -0,162865462 | 0 | N.A. | 0 |
| JAM3         | 0,052611801 | -0,124306453 | 0 | N.A. | 0 |
| PDE5A        | 0,052601065 | 0,034162315  | 0 | N.A. | 0 |
| POM121C      | 0,052542817 | 0,010441099  | 0 | N.A. | 0 |
| TNFRSF11B    | 0,052541285 | 0,55215939   | 0 | N.A. | 0 |

|             |             |              |   |      |   |
|-------------|-------------|--------------|---|------|---|
| FGFR1OP2    | 0,052523179 | 0,174231306  | 0 | N.A. | 0 |
| LINC00501   | 0,052508042 | 0,276896306  | 0 | N.A. | 0 |
| SNX29       | 0,052491276 | -0,018784248 | 0 | N.A. | 0 |
| CFAP53      | 0,052487283 | 0,003175331  | 0 | N.A. | 0 |
| SNX16       | 0,052447115 | 0,088466647  | 0 | N.A. | 0 |
| MT-CYB      | 0,05243993  | 0,198508073  | 0 | N.A. | 0 |
| COL8A1      | 0,05243667  | -0,247059457 | 0 | N.A. | 0 |
| RP4-533D7.4 | 0,052388084 | 0,014722007  | 0 | N.A. | 0 |
| FOXC2       | 0,052377901 | 0,01591779   | 0 | N.A. | 0 |
| PTN         | 0,052308305 | 0,119815681  | 0 | N.A. | 0 |
| CD300A      | 0,052273371 | 0,050833414  | 0 | N.A. | 0 |
| PHLDB1      | 0,05227003  | 0,116656562  | 0 | N.A. | 0 |
| DIDO1       | 0,052268937 | 0,279669366  | 0 | N.A. | 0 |
| TMEM61      | 0,052253014 | 0,279852812  | 0 | N.A. | 0 |
| PCED1A      | 0,05221884  | -0,112021808 | 0 | N.A. | 0 |
| FAM83H-AS1  | 0,05218003  | 0,346068209  | 0 | N.A. | 0 |
| LY9         | 0,05213001  |              | 0 | N.A. | 0 |
| DNAJC4      | 0,052108737 | -0,108832014 | 0 | N.A. | 0 |
| ADD3        | 0,052080583 | 0,245076826  | 0 | N.A. | 0 |
| HESX1       | 0,052071238 | -0,207396838 | 0 | N.A. | 0 |
| NR2F2-AS1   | 0,052065855 |              | 0 | N.A. | 0 |
| RNASEK-C17  | 0,052049296 | -0,089545863 | 0 | N.A. | 0 |
| RP11-169E6. | 0,052011088 |              | 0 | N.A. | 0 |
| CPQ         | 0,051996138 | 0,100332119  | 0 | N.A. | 0 |
| RP11-414C23 | 0,051989548 |              | 0 | N.A. | 0 |
| RP11-434I12 | 0,051982893 | 0,137741728  | 0 | N.A. | 0 |
| LBHD1       | 0,051801632 | -0,070129029 | 0 | N.A. | 0 |
| ZFAND6      | 0,051796682 | 0,180894063  | 0 | N.A. | 0 |
| RP11-77H9.2 | 0,051756145 | 0,0460884    | 0 | N.A. | 0 |
| ZMYM1       | 0,051715164 | -0,103713643 | 0 | N.A. | 0 |
| CES4A       | 0,051693686 | 0,179131561  | 0 | N.A. | 0 |
| RP5-1157M2  | 0,051670032 | 0,169482246  | 0 | N.A. | 0 |
| SNX22       | 0,051616664 | -0,053120764 | 0 | N.A. | 0 |

|             |             |              |   |      |   |
|-------------|-------------|--------------|---|------|---|
| HABP2       | 0,051603689 | 0,021094837  | 0 | N.A. | 0 |
| DNAH5       | 0,051578431 | 0,22125538   | 0 | N.A. | 0 |
| RP11-466P24 | 0,051569768 | -0,174910009 | 0 | N.A. | 0 |
| CYP4V2      | 0,051544222 | -0,135014748 | 0 | N.A. | 0 |
| CD80        | 0,051542516 |              | 0 | N.A. | 0 |
| SSTR1       | 0,051509133 | -0,269045249 | 0 | N.A. | 0 |
| TMED6       | 0,051497385 | -0,144975674 | 0 | N.A. | 0 |
| LINC01023   | 0,051479095 | -0,220306736 | 0 | N.A. | 0 |
| GATS        | 0,051460699 | 0,244150168  | 0 | N.A. | 0 |
| TTC28       | 0,051399081 | 0,121460623  | 0 | N.A. | 0 |
| GK5         | 0,051382487 | 0,085931252  | 0 | N.A. | 0 |
| ZNF275      | 0,051376785 | -0,315534395 | 0 | N.A. | 0 |
| RP11-258F22 | 0,051335256 |              | 0 | N.A. | 0 |
| CTD-2349P21 | 0,051308119 | 0,410990166  | 0 | N.A. | 0 |
| FAM95C      | 0,051302885 | 0,040675499  | 0 | N.A. | 0 |
| WBSCR17     | 0,051297903 |              | 0 | N.A. | 0 |
| CLIP3       | 0,051291159 | -0,271699566 | 0 | N.A. | 0 |
| RP11-506M1  | 0,051250088 | -0,24916852  | 0 | N.A. | 0 |
| C5AR2       | 0,051232882 |              | 0 | N.A. | 0 |
| RGS9BP      | 0,05113003  |              | 0 | N.A. | 0 |
| PDE7A       | 0,051119478 | 0,12674696   | 0 | N.A. | 0 |
| DNTTIP1     | 0,051104747 | 0,418044824  | 0 | N.A. | 0 |
| LINC00629   | 0,051103118 |              | 0 | N.A. | 0 |
| ADPGK-AS1   | 0,051052716 |              | 0 | N.A. | 0 |
| RP11-379B8. | 0,051041506 | -0,09865832  | 0 | N.A. | 0 |
| RFPL4A      | 0,051008938 |              | 0 | N.A. | 0 |
| PLEKHA4     | 0,051003821 | -0,079502911 | 0 | N.A. | 0 |
| ZNF555      | 0,050997771 | -0,093589913 | 0 | N.A. | 0 |
| THRSP       | 0,050981654 | 0,120578431  | 0 | N.A. | 0 |
| SNTA1       | 0,050969544 | 0,361935813  | 0 | N.A. | 0 |
| FAM98C      | 0,050931318 | 0,367202593  | 0 | N.A. | 0 |
| NPIPA5      | 0,050927034 | 0,029406476  | 0 | N.A. | 0 |
| BBS12       | 0,050906862 | 0,08159955   | 0 | N.A. | 0 |

|              |             |              |   |      |   |
|--------------|-------------|--------------|---|------|---|
| DOCK4        | 0,050881114 | 0,031134692  | 0 | N.A. | 0 |
| ZNF114       | 0,050878195 | 0,256719882  | 0 | N.A. | 0 |
| CAND1        | 0,050822586 | 0,115848935  | 0 | N.A. | 0 |
| MMP9         | 0,050804855 | -0,201143661 | 0 | N.A. | 0 |
| DNM1         | 0,050770312 | 0,176200672  | 0 | N.A. | 0 |
| NSUN3        | 0,05074568  | 0,137184994  | 0 | N.A. | 0 |
| SDF2         | 0,050695374 | 0,357892694  | 0 | N.A. | 0 |
| PIAS3        | 0,050688729 | 0,315484494  | 0 | N.A. | 0 |
| MUS81        | 0,05062401  | 0,182442355  | 0 | N.A. | 0 |
| LINC01176    | 0,050615447 | 0,16300979   | 0 | N.A. | 0 |
| STAU1        | 0,050607163 | 0,138214267  | 0 | N.A. | 0 |
| ACKR4        | 0,050600394 | 0,049017457  | 0 | N.A. | 0 |
| KLHL9        | 0,050579182 | 0,127287826  | 0 | N.A. | 0 |
| RGS11        | 0,050572932 | 0,363343783  | 0 | N.A. | 0 |
| SYDE2        | 0,050570332 | 0,042288421  | 0 | N.A. | 0 |
| AF131215.8   | 0,050555802 |              | 0 | N.A. | 0 |
| FUT8-AS1     | 0,050554933 | 0,00504572   | 0 | N.A. | 0 |
| FFAR2        | 0,050541671 | -0,126370138 | 0 | N.A. | 0 |
| DES12        | 0,050541657 | -0,046592194 | 0 | N.A. | 0 |
| RP11-480C22  | 0,050521444 |              | 0 | N.A. | 0 |
| MAML1        | 0,050478487 | -0,110483789 | 0 | N.A. | 0 |
| RP11-112J3.1 | 0,050449391 | -0,107022849 | 0 | N.A. | 0 |
| ZXDB         | 0,050438081 | -0,118275161 | 0 | N.A. | 0 |
| PXDNL        | 0,050428158 | 0,044112527  | 0 | N.A. | 0 |
| RP11-214C8.1 | 0,050416041 | 0,042058105  | 0 | N.A. | 0 |
| ITGB2-AS1    | 0,050398735 | 0,102037571  | 0 | N.A. | 0 |
| ARHGEF1      | 0,050391434 | 0,379433561  | 0 | N.A. | 0 |
| RP1-100J12.1 | 0,050382413 | -0,143244633 | 0 | N.A. | 0 |
| RPRD1B       | 0,05036742  | 0,160628957  | 0 | N.A. | 0 |
| TSPEAR-AS1   | 0,050294795 | 0,103672351  | 0 | N.A. | 0 |
| AC006262.4   | 0,05025925  | 0,097182502  | 0 | N.A. | 0 |
| ITGB2        | 0,050255864 | -0,195952856 | 0 | N.A. | 0 |
| FAF2         | 0,050200979 | 0,45567315   | 0 | N.A. | 0 |

|              |             |              |   |      |   |
|--------------|-------------|--------------|---|------|---|
| HS3ST6       | 0,05020019  | 0,184611213  | 0 | N.A. | 0 |
| USP42        | 0,050191957 | 0,089342396  | 0 | N.A. | 0 |
| CCDC69       | 0,050185646 | 0,15297011   | 0 | N.A. | 0 |
| DLG3-AS1     | 0,050126999 | 0,204939986  | 0 | N.A. | 0 |
| HIPK1-AS1    | 0,050097978 | -0,272561628 | 0 | N.A. | 0 |
| HCG25        | 0,05006476  |              | 0 | N.A. | 0 |
| ASAP3        | 0,050062499 | -0,092679384 | 0 | N.A. | 0 |
| SNX29P2      | 0,050052102 | -0,125730185 | 0 | N.A. | 0 |
| KCNC3        | 0,049985161 | 0,015707655  | 0 | N.A. | 0 |
| SLC25A28     | 0,049982841 | 0,167021691  | 0 | N.A. | 0 |
| GPNMB        | 0,049981817 | -0,181537603 | 0 | N.A. | 0 |
| CXXC5        | 0,049974695 | 0,319849329  | 0 | N.A. | 0 |
| RP11-736K20  | 0,049923723 | -0,143240827 | 0 | N.A. | 0 |
| GCNT1        | 0,049902422 | 0,156420034  | 0 | N.A. | 0 |
| HCRT         | 0,049891546 | 0,122606838  | 0 | N.A. | 0 |
| RP11-430G17  | 0,049855166 | -0,160742264 | 0 | N.A. | 0 |
| SEMA4A       | 0,04981845  | 0,110953743  | 0 | N.A. | 0 |
| CD69         | 0,049799245 | -0,114086412 | 0 | N.A. | 0 |
| RP11-803P9.  | 0,049794963 | 0,150519898  | 0 | N.A. | 0 |
| NACAD        | 0,04978692  |              | 0 | N.A. | 0 |
| CDH5         | 0,049739574 | 0,075400901  | 0 | N.A. | 0 |
| RP11-356J5.1 | 0,049719782 | 0,048699824  | 0 | N.A. | 0 |
| TESK2        | 0,049703725 | 0,089995934  | 0 | N.A. | 0 |
| PEX13        | 0,049682596 | 0,089138882  | 0 | N.A. | 0 |
| SMG8         | 0,049556673 | 0,338727161  | 0 | N.A. | 0 |
| AP3S2        | 0,049510004 | -0,115215468 | 0 | N.A. | 0 |
| KLF12        | 0,04949839  | 0,008900291  | 0 | N.A. | 0 |
| ZBTB20-AS4   | 0,049492812 | 0,151478709  | 0 | N.A. | 0 |
| GPR75        | 0,049491644 |              | 0 | N.A. | 0 |
| RP11-60L3.1  | 0,049447709 |              | 0 | N.A. | 0 |
| RP13-379L11  | 0,049428128 |              | 0 | N.A. | 0 |
| LINC00923    | 0,049419649 | 0,038805576  | 0 | N.A. | 0 |
| ARMC5        | 0,049417341 | -0,179288116 | 0 | N.A. | 0 |

|              |             |              |   |      |   |
|--------------|-------------|--------------|---|------|---|
| GRTP1-AS1    | 0,049398113 | -0,159453705 | 0 | N.A. | 0 |
| AC012499.1   | 0,049349347 |              | 0 | N.A. | 0 |
| PDPN         | 0,049345931 | 0,008626501  | 0 | N.A. | 0 |
| CXCL9        | 0,049340754 | 0,011390384  | 0 | N.A. | 0 |
| BTAF1        | 0,049319217 | 0,023676951  | 0 | N.A. | 0 |
| RP11-413H2   | 0,049305309 | 0,11767033   | 0 | N.A. | 0 |
| AC106801.1   | 0,049303796 |              | 0 | N.A. | 0 |
| THAP8        | 0,049241918 | 0,045735284  | 0 | N.A. | 0 |
| LNX1-AS1     | 0,049225336 |              | 0 | N.A. | 0 |
| CCDC78       | 0,049173907 | 0,307963073  | 0 | N.A. | 0 |
| UBQLN1       | 0,049142493 | 0,471190002  | 0 | N.A. | 0 |
| VEZF1        | 0,049096729 | 0,04231526   | 0 | N.A. | 0 |
| AC012363.4   | 0,049059931 | 0,002037195  | 0 | N.A. | 0 |
| UVRAG        | 0,049046117 | 0,050481228  | 0 | N.A. | 0 |
| TMIE         | 0,04900005  | 0,053002083  | 0 | N.A. | 0 |
| RP5-858B6.1  | 0,048899575 | 0,252675539  | 0 | N.A. | 0 |
| RNF208       | 0,048893553 | -0,042375798 | 0 | N.A. | 0 |
| AC009133.21  | 0,048851666 | 0,110537444  | 0 | N.A. | 0 |
| RP4-550H1.5  | 0,048845759 |              | 0 | N.A. | 0 |
| AGO3         | 0,048829988 | 0,109975669  | 0 | N.A. | 0 |
| CITF22-49E9. | 0,048828039 |              | 0 | N.A. | 0 |
| RIPK2        | 0,04880363  | 0,056794154  | 0 | N.A. | 0 |
| RP13-494C23  | 0,048800495 |              | 0 | N.A. | 0 |
| RP11-326C3.  | 0,048794964 |              | 0 | N.A. | 0 |
| TJAP1        | 0,048786019 | -0,017319153 | 0 | N.A. | 0 |
| BACE1-AS     | 0,048776334 | -0,084533812 | 0 | N.A. | 0 |
| CTC-479C5.1  | 0,048751304 | -0,076093092 | 0 | N.A. | 0 |
| OBSL1        | 0,048720838 | 0,055848945  | 0 | N.A. | 0 |
| CTD-2012K14  | 0,048695566 |              | 0 | N.A. | 0 |
| COL18A1      | 0,048691356 | -0,218483021 | 0 | N.A. | 0 |
| KIAA1919     | 0,048634788 | -0,032671132 | 0 | N.A. | 0 |
| SOCS4        | 0,048628499 | -0,151785648 | 0 | N.A. | 0 |
| BAIAP2-AS1   | 0,048591575 | 0,173457359  | 0 | N.A. | 0 |

|             |             |              |   |      |   |
|-------------|-------------|--------------|---|------|---|
| CTD-3105H1  | 0,048576205 | 0,136840482  | 0 | N.A. | 0 |
| MEIS3       | 0,048559634 | 0,026399884  | 0 | N.A. | 0 |
| RP11-474B16 | 0,048547241 |              | 0 | N.A. | 0 |
| SCN9A       | 0,048547144 | 0,225489394  | 0 | N.A. | 0 |
| USP49       | 0,048528622 | 0,286230248  | 0 | N.A. | 0 |
| RP11-219G17 | 0,048464835 | 0,068985489  | 0 | N.A. | 0 |
| ZNF212      | 0,048462557 | 0,057205177  | 0 | N.A. | 0 |
| RP11-706O1  | 0,048437283 | 0,229031835  | 0 | N.A. | 0 |
| CGRRF1      | 0,048433095 | 0,11337265   | 0 | N.A. | 0 |
| TMEM115     | 0,048427845 | 0,321598458  | 0 | N.A. | 0 |
| RP11-535A19 | 0,048404876 | -0,237626893 | 0 | N.A. | 0 |
| RP11-798M1  | 0,04839222  | 0,089312083  | 0 | N.A. | 0 |
| PAQR5       | 0,048384938 | -0,002301308 | 0 | N.A. | 0 |
| RP11-192H23 | 0,048367101 | -0,126792599 | 0 | N.A. | 0 |
| SPDYE5      | 0,048353925 | -0,016388647 | 0 | N.A. | 0 |
| PAPD5       | 0,048331025 | -0,161403972 | 0 | N.A. | 0 |
| PHACTR1     | 0,048327388 | -0,04637346  | 0 | N.A. | 0 |
| G3BP2       | 0,048324508 | -0,015351512 | 0 | N.A. | 0 |
| NGRN        | 0,048317289 | -0,007548952 | 1 | cl2  | 0 |
| RP11-234K24 | 0,048306752 | 0,078987935  | 0 | N.A. | 0 |
| AGPAT6      | 0,04830409  | 0,453457863  | 0 | N.A. | 0 |
| TMPRSS13    | 0,048299707 | 0,053874984  | 0 | N.A. | 0 |
| DUSP7       | 0,048276315 | 0,022140054  | 0 | N.A. | 0 |
| TCF21       | 0,048268686 | 0,165624403  | 0 | N.A. | 0 |
| CXCR1       | 0,048257543 | 0,36239337   | 0 | N.A. | 0 |
| DZANK1      | 0,048241651 | 0,087025672  | 0 | N.A. | 0 |
| GNG11       | 0,048232593 | -0,246459901 | 0 | N.A. | 0 |
| RP4-671O14  | 0,048225268 | -0,108358869 | 0 | N.A. | 0 |
| LRRC41      | 0,048203356 | -0,146730258 | 0 | N.A. | 0 |
| FOXD2       | 0,048182402 | -0,205520019 | 0 | N.A. | 0 |
| RP11-18C24  | 0,048169957 |              | 0 | N.A. | 0 |
| CTC-498J12  | 0,048167533 | -0,131138633 | 0 | N.A. | 0 |
| FAM198B     | 0,048160255 | 0,222539645  | 0 | N.A. | 0 |



|             |             |              |   |      |   |
|-------------|-------------|--------------|---|------|---|
| ID4         | 0,048116421 | -0,12793195  | 0 | N.A. | 0 |
| GOSR2       | 0,048052964 | 0,120996404  | 0 | N.A. | 0 |
| ZNF683      | 0,048041623 | 0,10364874   | 0 | N.A. | 0 |
| HS1BP3      | 0,047973901 | 0,259092918  | 0 | N.A. | 0 |
| RP11-345P4. | 0,04796596  | 0,082019753  | 0 | N.A. | 0 |
| SUGCT       | 0,047955844 | -0,15830066  | 0 | N.A. | 0 |
| AC002398.11 | 0,047934356 |              | 0 | N.A. | 0 |
| POTEE       | 0,047924352 |              | 0 | N.A. | 0 |
| C16orf89    | 0,0479105   | -0,299354089 | 0 | N.A. | 0 |
| PNRC2       | 0,047908309 | -0,204115442 | 0 | N.A. | 0 |
| CCDC152     | 0,047882978 | -0,117167484 | 0 | N.A. | 0 |
| PKD2L2      | 0,047857872 |              | 0 | N.A. | 0 |
| CD300E      | 0,047855995 | 0,214355301  | 0 | N.A. | 0 |
| FILIP1      | 0,047826908 | -0,23916611  | 0 | N.A. | 0 |
| POGK        | 0,047800506 | 0,127320714  | 0 | N.A. | 0 |
| RLTPR       | 0,047778674 | -0,088758096 | 0 | N.A. | 0 |
| MGC45922    | 0,047778341 | -0,035489937 | 0 | N.A. | 0 |
| RP5-1119A7. | 0,047736061 | -0,108386536 | 0 | N.A. | 0 |
| OST4        | 0,047730629 | -0,162071999 | 0 | N.A. | 0 |
| AP004550.1  | 0,047729986 | -0,055394544 | 0 | N.A. | 0 |
| SLC2A6      | 0,047709557 | 0,277731536  | 0 | N.A. | 0 |
| LCORL       | 0,047689578 | 0,070586974  | 0 | N.A. | 0 |
| MED12       | 0,047662505 | 0,082174958  | 0 | N.A. | 0 |
| DET1        | 0,04766173  | -0,256113572 | 0 | N.A. | 0 |
| CLEC4E      | 0,047659903 |              | 0 | N.A. | 0 |
| RP11-977B10 | 0,047590343 | -0,088471364 | 0 | N.A. | 0 |
| TRAPPC2B    | 0,047586524 | 0,167281457  | 0 | N.A. | 0 |
| LRRK1       | 0,047577026 | -0,032980152 | 0 | N.A. | 0 |
| SPEG        | 0,047551089 | 0,043152163  | 0 | N.A. | 0 |
| C17orf82    | 0,047530317 | 0,116162047  | 0 | N.A. | 0 |
| REG1B       | 0,047520207 | -0,004820972 | 0 | N.A. | 0 |
| RNF111      | 0,047518478 | 0,163531187  | 0 | N.A. | 0 |
| RP11-756H6. | 0,047499689 | 0,156115603  | 0 | N.A. | 0 |

|             |             |              |   |      |   |
|-------------|-------------|--------------|---|------|---|
| SALL4       | 0,047481882 | -0,027586718 | 0 | N.A. | 0 |
| RP11-162G10 | 0,047455857 | -0,069089437 | 0 | N.A. | 0 |
| CLDN19      | 0,04743795  |              | 0 | N.A. | 0 |
| CHRN19      | 0,047426473 | -0,14374634  | 0 | N.A. | 0 |
| CTD-2521M2  | 0,047408016 |              | 0 | N.A. | 0 |
| BCORL1      | 0,047401418 | 0,038188888  | 0 | N.A. | 0 |
| APBA1       | 0,047374662 | -0,107388139 | 0 | N.A. | 0 |
| NAT6        | 0,047345761 | 0,227248174  | 0 | N.A. | 0 |
| TMEM220     | 0,04722122  | -0,054421894 | 0 | N.A. | 0 |
| FAM117A     | 0,047217981 | 0,320449867  | 0 | N.A. | 0 |
| CTRL        | 0,0471544   | 0,104954283  | 0 | N.A. | 0 |
| KAL1        | 0,047141637 | 0,026832826  | 0 | N.A. | 0 |
| RP11-89K21. | 0,047106928 | -0,325356653 | 0 | N.A. | 0 |
| PCNXL4      | 0,047086437 | 0,098264323  | 0 | N.A. | 0 |
| PLS3-AS1    | 0,047077267 | 0,359387648  | 0 | N.A. | 0 |
| UBE2V1      | 0,047057744 | -0,028286598 | 0 | N.A. | 0 |
| WNT10B      | 0,047042482 | 0,014722007  | 0 | N.A. | 0 |
| PLEKHO1     | 0,046980403 | -0,242803379 | 0 | N.A. | 0 |
| CNTNAP3     | 0,046928541 | -0,283539552 | 0 | N.A. | 0 |
| KLB         | 0,046886298 | 0,312195027  | 0 | N.A. | 0 |
| MARK1       | 0,046884473 | 0,155289704  | 0 | N.A. | 0 |
| RP4-635E18. | 0,046869215 | 0,108572936  | 0 | N.A. | 0 |
| OCRL        | 0,046859052 | -0,162902993 | 0 | N.A. | 0 |
| MEI1        | 0,046846843 | -0,237476911 | 0 | N.A. | 0 |
| ZFP28       | 0,046762586 | -0,275314242 | 0 | N.A. | 0 |
| SLC41A3     | 0,04673978  | -0,251053483 | 0 | N.A. | 0 |
| MAP3K7CL    | 0,046662872 | 0,101413076  | 0 | N.A. | 0 |
| ZCCHC10     | 0,046660741 | 0,2471738    | 0 | N.A. | 0 |
| DUOX1       | 0,046626559 | 0,178974486  | 0 | N.A. | 0 |
| RP11-667M1  | 0,046609778 |              | 0 | N.A. | 0 |
| TRBV25-1    | 0,046546979 | -0,387867461 | 0 | N.A. | 0 |
| RP11-74E22. | 0,046526956 | 0,059563247  | 0 | N.A. | 0 |
| DRGX        | 0,046428188 | 0,191455494  | 0 | N.A. | 0 |

|             |             |              |   |      |   |
|-------------|-------------|--------------|---|------|---|
| C7orf60     | 0,046422938 | -0,148597256 | 0 | N.A. | 0 |
| LAMA2       | 0,046381307 | -0,042532112 | 0 | N.A. | 0 |
| AC140725.4  | 0,046371268 |              | 0 | N.A. | 0 |
| RP11-2E11.6 | 0,046358543 | 0,006800455  | 0 | N.A. | 0 |
| RHBDL1      | 0,046309427 | 0,114528273  | 0 | N.A. | 0 |
| AC097662.2  | 0,046295706 |              | 0 | N.A. | 0 |
| TIAM2       | 0,046290494 | 0,362599531  | 0 | N.A. | 0 |
| GOLGA6L10   | 0,046290004 | 0,286770952  | 0 | N.A. | 0 |
| ZXDC        | 0,046280121 | 0,087803194  | 0 | N.A. | 0 |
| EPN2-AS1    | 0,046261849 |              | 0 | N.A. | 0 |
| RP11-961A19 | 0,046238074 | 0,014005086  | 0 | N.A. | 0 |
| ARHGEF9     | 0,04621707  | 0,015633473  | 0 | N.A. | 0 |
| LINC01465   | 0,046203451 | 0,215531435  | 0 | N.A. | 0 |
| PAPPA       | 0,046180412 | -0,046407798 | 0 | N.A. | 0 |
| AFAP1-AS1   | 0,046170143 | 0,076118312  | 0 | N.A. | 0 |
| CTB-5506.12 | 0,046160082 | 0,20516228   | 0 | N.A. | 0 |
| RNASE7      | 0,046104065 | -0,068589757 | 0 | N.A. | 0 |
| RP11-130F10 | 0,046103899 |              | 0 | N.A. | 0 |
| CTD-2366F13 | 0,046088381 | 0,020401274  | 0 | N.A. | 0 |
| EAF1-AS1    | 0,046077692 | 0,044033493  | 0 | N.A. | 0 |
| SLC25A42    | 0,046043244 | -0,130699932 | 0 | N.A. | 0 |
| BMP4        | 0,046034478 | 0,553632062  | 0 | N.A. | 0 |
| FBLN5       | 0,045994855 | 0,06068011   | 0 | N.A. | 0 |
| MT-ATP6     | 0,045974797 | 0,224152915  | 0 | N.A. | 0 |
| RP11-626K17 | 0,045951906 | 0,097793156  | 0 | N.A. | 0 |
| RP11-93209. | 0,045941246 |              | 0 | N.A. | 0 |
| AGAP10      | 0,045940983 | 0,350153207  | 0 | N.A. | 0 |
| CTD-2026K11 | 0,045917097 | 0,054727096  | 0 | N.A. | 0 |
| SLC35E2     | 0,045915115 | 0,014751671  | 0 | N.A. | 0 |
| MATN3       | 0,045889797 |              | 0 | N.A. | 0 |
| RP1-187B23. | 0,045878716 | -0,146865157 | 0 | N.A. | 0 |
| MTOR        | 0,045799267 | -0,051957261 | 0 | N.A. | 0 |
| NRXN1       | 0,045775699 |              | 0 | N.A. | 0 |

|             |             |              |   |      |   |
|-------------|-------------|--------------|---|------|---|
| APBB2       | 0,045774773 | -0,023529035 | 0 | N.A. | 0 |
| AC011523.2  | 0,045773287 | -0,138122281 | 0 | N.A. | 0 |
| VPS39       | 0,045753448 | 0,139840726  | 0 | N.A. | 0 |
| CTD-2530H1  | 0,045738359 | -0,076230895 | 0 | N.A. | 0 |
| PAPD7       | 0,045726307 | -0,00295587  | 0 | N.A. | 0 |
| JRK         | 0,045692271 | 0,109681586  | 0 | N.A. | 0 |
| MTURN       | 0,045681701 | 0,055609615  | 0 | N.A. | 0 |
| RP4-647C14. | 0,045679771 | 0,367954129  | 0 | N.A. | 0 |
| ZNF41       | 0,04564781  | -0,078700274 | 0 | N.A. | 0 |
| EN2         | 0,045636875 | 0,34290262   | 0 | N.A. | 0 |
| SEPHS2      | 0,045633849 | -0,165149341 | 0 | N.A. | 0 |
| ZNF250      | 0,045630471 | -0,316324725 | 0 | N.A. | 0 |
| LINC01004   | 0,045612608 | 0,215837594  | 0 | N.A. | 0 |
| AKAP7       | 0,045608736 | 0,088140394  | 0 | N.A. | 0 |
| CLK1        | 0,04555249  | 0,277589115  | 0 | N.A. | 0 |
| CSF1R       | 0,04551551  | -0,157700284 | 0 | N.A. | 0 |
| PRSS35      | 0,045508862 |              | 0 | N.A. | 0 |
| ATP6V1C1    | 0,045462146 | 0,064037407  | 0 | N.A. | 0 |
| AC007966.1  | 0,045445119 | 0,015193087  | 0 | N.A. | 0 |
| GON4L       | 0,045421079 | 0,118386504  | 0 | N.A. | 0 |
| RP11-500B12 | 0,045396387 | -0,071564116 | 0 | N.A. | 0 |
| HCAR2       | 0,045389671 | -0,023476861 | 0 | N.A. | 0 |
| RP4-533D7.5 | 0,045370077 | -0,279407261 | 0 | N.A. | 0 |
| EFHC2       | 0,045343223 | -0,229383603 | 0 | N.A. | 0 |
| PALM3       | 0,045310723 | 0,081824251  | 0 | N.A. | 0 |
| UBE3A       | 0,04530659  | 0,294997648  | 0 | N.A. | 0 |
| ABCG5       | 0,045288704 | 0,351441326  | 0 | N.A. | 0 |
| PDZD8       | 0,045279271 | 0,197388693  | 0 | N.A. | 0 |
| CDK16       | 0,045261588 | -0,03318628  | 0 | N.A. | 0 |
| XXbac-BPG30 | 0,045254418 | -0,126918645 | 0 | N.A. | 0 |
| RAB43       | 0,045224662 | -0,073392519 | 0 | N.A. | 0 |
| PGBD3       | 0,04511853  |              | 0 | N.A. | 0 |
| NPIP4       | 0,04511465  | 0,429773919  | 0 | N.A. | 0 |

|             |             |              |   |      |   |
|-------------|-------------|--------------|---|------|---|
| RP1-228P16. | 0,0450965   | -0,08959094  | 0 | N.A. | 0 |
| AIP         | 0,045074824 | -0,059081654 | 0 | N.A. | 0 |
| FAM218A     | 0,045067858 | -0,055489061 | 0 | N.A. | 0 |
| LRRC46      | 0,045056905 | -0,182731883 | 0 | N.A. | 0 |
| PRDM15      | 0,045056504 | 0,087419712  | 0 | N.A. | 0 |
| ANKDD1A     | 0,045042681 | -0,042445014 | 0 | N.A. | 0 |
| GPR64       | 0,045022358 |              | 0 | N.A. | 0 |
| GS1-259H13. | 0,045021243 | 0,116251739  | 0 | N.A. | 0 |
| RP11-66H6.3 | 0,044998201 | -0,02875174  | 0 | N.A. | 0 |
| FAM83C-AS1  | 0,044965405 | 0,057497946  | 0 | N.A. | 0 |
| RP4-568C11. | 0,044926928 | 0,147932666  | 0 | N.A. | 0 |
| MYCBP2-AS1  | 0,044906681 | 0,044670365  | 0 | N.A. | 0 |
| LMOD1       | 0,044901763 | -0,013183274 | 0 | N.A. | 0 |
| ZNF57       | 0,044894225 | -0,142551348 | 0 | N.A. | 0 |
| RHOBTB1     | 0,044880471 | 0,247834363  | 0 | N.A. | 0 |
| ERCC6       | 0,044876323 | 0,027734285  | 0 | N.A. | 0 |
| RP11-465B22 | 0,044875635 | 0,295667888  | 0 | N.A. | 0 |
| KCNQ1-AS1   | 0,044861212 |              | 0 | N.A. | 0 |
| PCGF2       | 0,044834172 | -0,008914137 | 0 | N.A. | 0 |
| CCZ1        | 0,044811842 | 0,256132575  | 0 | N.A. | 0 |
| C20orf194   | 0,04479884  | 0,095547482  | 0 | N.A. | 0 |
| SERPINA1    | 0,04475969  | 0,364724474  | 0 | N.A. | 0 |
| CECR3       | 0,044742997 | 0,256814726  | 0 | N.A. | 0 |
| EXTL3-AS1   | 0,044708254 | 0,173659146  | 0 | N.A. | 0 |
| HDC         | 0,044690147 | -0,014083432 | 0 | N.A. | 0 |
| NMNAT2      | 0,044688337 | -0,277677768 | 0 | N.A. | 0 |
| CYYR1       | 0,044665459 | -0,027616885 | 0 | N.A. | 0 |
| RUNDC3A     | 0,044650824 | 0,396583104  | 0 | N.A. | 0 |
| TBX21       | 0,044630583 |              | 0 | N.A. | 0 |
| ZCCHC14     | 0,044612196 | 0,252013721  | 0 | N.A. | 0 |
| RP11-573D15 | 0,044537761 | -0,058778855 | 0 | N.A. | 0 |
| HBA1        | 0,044520262 | 0,098678502  | 0 | N.A. | 0 |
| MROH8       | 0,044494081 | 0,001428075  | 0 | N.A. | 0 |

|             |             |              |   |      |   |
|-------------|-------------|--------------|---|------|---|
| ZNF878      | 0,044481112 | -0,122405616 | 0 | N.A. | 0 |
| LY96        | 0,044456296 | -0,34819614  | 0 | N.A. | 0 |
| RP11-93001  | 0,044433285 | 0,25951483   | 0 | N.A. | 0 |
| CBWD7       | 0,044335314 | 0,090970348  | 0 | N.A. | 0 |
| MYBPC1      | 0,044247328 | 0,076576503  | 1 | none | 0 |
| ZNF605      | 0,044210474 | -0,046725244 | 0 | N.A. | 0 |
| PDE4DIP     | 0,044198754 | 0,079932151  | 0 | N.A. | 0 |
| LIPC        | 0,04415697  |              | 0 | N.A. | 0 |
| CEBPB-AS1   | 0,044147061 | 0,105664491  | 0 | N.A. | 0 |
| HIST1H4D    | 0,044115374 | -0,20443618  | 0 | N.A. | 0 |
| RP11-253E3  | 0,044091322 | 0,015264439  | 0 | N.A. | 0 |
| ZFPL1       | 0,044082219 | 0,17322485   | 0 | N.A. | 0 |
| CPT1A       | 0,044066672 | -0,163421634 | 0 | N.A. | 0 |
| RP11-350J20 | 0,04400565  | -0,091322052 | 0 | N.A. | 0 |
| RP11-439E19 | 0,043973642 | 0,008196029  | 0 | N.A. | 0 |
| PRR15L      | 0,043969751 | 0,487238169  | 0 | N.A. | 0 |
| RP11-324I22 | 0,043956666 | 0,172083994  | 0 | N.A. | 0 |
| XXbac-BPG17 | 0,0439515   |              | 0 | N.A. | 0 |
| EXTL3       | 0,043904814 | 0,282504384  | 0 | N.A. | 0 |
| UFL1        | 0,043885675 | 0,387888575  | 0 | N.A. | 0 |
| RP11-160H22 | 0,043885125 | -0,073419476 | 0 | N.A. | 0 |
| SHISA3      | 0,04388122  |              | 0 | N.A. | 0 |
| ACP5        | 0,043880703 | -0,099747008 | 0 | N.A. | 0 |
| LACTB       | 0,043871281 | 0,154255976  | 0 | N.A. | 0 |
| KLRF1       | 0,043866546 | -0,062707975 | 0 | N.A. | 0 |
| WAS         | 0,04380448  | -0,141531745 | 0 | N.A. | 0 |
| C17orf100   | 0,043736876 | 0,088388901  | 0 | N.A. | 0 |
| NXPE4       | 0,043729795 | -0,169390388 | 0 | N.A. | 0 |
| AC069363.1  | 0,04372106  | -0,083490092 | 0 | N.A. | 0 |
| FCRLB       | 0,043718599 | -0,108122656 | 0 | N.A. | 0 |
| KLF9        | 0,043688267 | -0,066485012 | 0 | N.A. | 0 |
| FXD2        | 0,043687853 | 0,3872307    | 0 | N.A. | 0 |
| CTB-46B19.2 | 0,043687794 | -0,005625819 | 0 | N.A. | 0 |

|             |             |              |   |      |   |
|-------------|-------------|--------------|---|------|---|
| KB-208E9.1  | 0,043668099 |              | 0 | N.A. | 0 |
| MAVS        | 0,043639026 | 0,151444041  | 0 | N.A. | 0 |
| GPR162      | 0,043630236 | -0,066151017 | 0 | N.A. | 0 |
| CTD-2036P10 | 0,043585702 | 0,021219307  | 0 | N.A. | 0 |
| RP1-78B3.1  | 0,04356139  | 0,138377444  | 0 | N.A. | 0 |
| ANKRD18A    | 0,043508201 | 0,191057514  | 0 | N.A. | 0 |
| SLC25A48    | 0,043503802 | -0,204795424 | 0 | N.A. | 0 |
| HIGD2B      | 0,043495743 | 0,039657391  | 0 | N.A. | 0 |
| WEE2-AS1    | 0,043482111 | -0,000771911 | 0 | N.A. | 0 |
| ZNF345      | 0,043451196 | 0,075589736  | 0 | N.A. | 0 |
| RP11-894P9. | 0,043445909 |              | 0 | N.A. | 0 |
| C9orf41-AS1 | 0,043369259 |              | 0 | N.A. | 0 |
| TIMP3       | 0,043362636 | 0,006595219  | 0 | N.A. | 0 |
| C3orf62     | 0,043360378 | 0,139731116  | 0 | N.A. | 0 |
| RP11-191G24 | 0,043358188 | -0,187634925 | 0 | N.A. | 0 |
| LRRC70      | 0,043337133 |              | 0 | N.A. | 0 |
| TDRD7       | 0,04332077  | 0,280050518  | 0 | N.A. | 0 |
| RP5-940J5.9 | 0,043310045 | -0,331409816 | 0 | N.A. | 0 |
| CCDC144A    | 0,043309694 | 0,133542941  | 0 | N.A. | 0 |
| SCAP        | 0,043303183 | 0,264826114  | 0 | N.A. | 0 |
| HSF4        | 0,043251321 | 0,044217075  | 0 | N.A. | 0 |
| TMEM130     | 0,043236462 | 0,043253808  | 0 | N.A. | 0 |
| KLHL25      | 0,043226748 | 0,046901231  | 0 | N.A. | 0 |
| CNTNAP3B    | 0,043218158 | -0,170065372 | 0 | N.A. | 0 |
| RP11-539G18 | 0,043170669 | 0,288944564  | 0 | N.A. | 0 |
| MFAP5       | 0,043132448 | -0,230865292 | 0 | N.A. | 0 |
| ZNF277      | 0,0431297   | -0,224008081 | 0 | N.A. | 0 |
| KLHL29      | 0,043128943 | 0,048009435  | 0 | N.A. | 0 |
| TYK2        | 0,043054379 | 0,067370799  | 0 | N.A. | 0 |
| DPYD        | 0,043042178 | 0,087867565  | 0 | N.A. | 0 |
| RP11-159D12 | 0,042972057 | 0,123501503  | 0 | N.A. | 0 |
| LPP-AS2     | 0,042964463 | 0,20511476   | 0 | N.A. | 0 |
| AC093901.1  | 0,04296345  | 0,14723576   | 0 | N.A. | 0 |

|             |             |              |   |      |   |
|-------------|-------------|--------------|---|------|---|
| BTN2A2      | 0,042957365 | 0,243389141  | 0 | N.A. | 0 |
| RP4-569M23  | 0,042932719 | -0,02011289  | 0 | N.A. | 0 |
| CHURC1-FNT  | 0,042926953 | -0,111795667 | 0 | N.A. | 0 |
| C4orf33     | 0,042897119 | -0,189173263 | 0 | N.A. | 0 |
| UNC13B      | 0,042896098 | 0,152574554  | 0 | N.A. | 0 |
| RP11-650P15 | 0,04289102  | 0,254791821  | 0 | N.A. | 0 |
| FOXK2       | 0,042876154 | 0,161545994  | 0 | N.A. | 0 |
| HUNK        | 0,042843008 | -0,026644147 | 0 | N.A. | 0 |
| ERC1        | 0,042833446 | 0,085516475  | 0 | N.A. | 0 |
| UNKL        | 0,042818709 | -0,06592303  | 0 | N.A. | 0 |
| C1QTNF4     | 0,042807114 | -0,281482155 | 0 | N.A. | 0 |
| SHANK2-AS1  | 0,0427725   |              | 0 | N.A. | 0 |
| ARL2BP      | 0,042761229 | -0,049754773 | 0 | N.A. | 0 |
| CLEC4A      | 0,042720739 | 0,131436092  | 0 | N.A. | 0 |
| RP11-474D1. | 0,042670383 |              | 0 | N.A. | 0 |
| RP5-882C2.2 | 0,042658178 | 0,208889875  | 0 | N.A. | 0 |
| ZNF799      | 0,042585926 | 0,148131892  | 0 | N.A. | 0 |
| NOXO1       | 0,042533272 | 0,452413124  | 0 | N.A. | 0 |
| MEGF8       | 0,042512124 | 0,247092237  | 0 | N.A. | 0 |
| EEPD1       | 0,042488379 | 0,01608789   | 0 | N.A. | 0 |
| POLK        | 0,042469132 | -0,100760808 | 0 | N.A. | 0 |
| LRRC57      | 0,042468094 | 0,087806434  | 0 | N.A. | 0 |
| STON1       | 0,042452109 | 0,238043401  | 0 | N.A. | 0 |
| AC005329.7  | 0,042409747 | 0,181393091  | 0 | N.A. | 0 |
| HLA-DQA2    | 0,042392307 |              | 0 | N.A. | 0 |
| PPAPDC1A    | 0,042385058 | 0,01190635   | 0 | N.A. | 0 |
| TXLNA       | 0,042330106 | -0,005733291 | 0 | N.A. | 0 |
| SYNJ1       | 0,042313983 | -0,275413305 | 0 | N.A. | 0 |
| RANBP17     | 0,042288726 | 0,128215052  | 0 | N.A. | 0 |
| AGBL1       | 0,042271157 |              | 0 | N.A. | 0 |
| GRHL2       | 0,042212584 | -0,134049067 | 0 | N.A. | 0 |
| RP11-575F12 | 0,042202296 | -0,057643264 | 0 | N.A. | 0 |
| RP11-597D13 | 0,042174042 | -0,10186899  | 0 | N.A. | 0 |



|              |             |              |   |      |   |
|--------------|-------------|--------------|---|------|---|
| CH507-254M   | 0,042172985 | -0,0387709   | 0 | N.A. | 0 |
| APC2         | 0,042151748 | 0,01704278   | 0 | N.A. | 0 |
| ABCC1        | 0,042127656 | 0,154320861  | 0 | N.A. | 0 |
| IL17D        | 0,042127349 | -0,106755127 | 0 | N.A. | 0 |
| ZNF235       | 0,042116122 | -0,057047275 | 0 | N.A. | 0 |
| ZNF407       | 0,042105113 | 0,232260888  | 0 | N.A. | 0 |
| GLIS3-AS1    | 0,042075995 | 0,07780627   | 0 | N.A. | 0 |
| INHBB        | 0,042068772 | 0,30078859   | 0 | N.A. | 0 |
| LINC00393    | 0,042057238 | 0,075345339  | 0 | N.A. | 0 |
| TRPV1        | 0,042021637 | 0,300319725  | 0 | N.A. | 0 |
| EMILIN2      | 0,041989957 | 0,145702711  | 0 | N.A. | 0 |
| MEGF11       | 0,041966835 |              | 0 | N.A. | 0 |
| RP11-1148L6  | 0,041956442 | 0,028987544  | 0 | N.A. | 0 |
| RP11-568N6   | 0,041947508 | 0,085060539  | 0 | N.A. | 0 |
| PANK4        | 0,041926359 | 0,054116159  | 0 | N.A. | 0 |
| RP11-428K3   | 0,041894599 | 0,051216649  | 0 | N.A. | 0 |
| RP11-89H19   | 0,041893114 | -0,066350673 | 0 | N.A. | 0 |
| LINC01433    | 0,041883243 |              | 0 | N.A. | 0 |
| RP11-202A13  | 0,041881434 | 0,148451194  | 0 | N.A. | 0 |
| RP11-545M1   | 0,041878341 | 0,031287697  | 0 | N.A. | 0 |
| C21orf91-OT  | 0,041847832 |              | 0 | N.A. | 0 |
| CH17-125A10  | 0,041839456 |              | 0 | N.A. | 0 |
| PHF11        | 0,041832721 | -0,038793282 | 0 | N.A. | 0 |
| A2M          | 0,041821649 | -0,041130682 | 0 | N.A. | 0 |
| CTA-384D8.3  | 0,041821628 |              | 0 | N.A. | 0 |
| NR3C1        | 0,041815996 | 0,108801153  | 0 | N.A. | 0 |
| RP11-797H7   | 0,041812071 | -0,020632409 | 0 | N.A. | 0 |
| C11orf63     | 0,041800267 |              | 0 | N.A. | 0 |
| PARP15       | 0,041753203 | -0,123907018 | 0 | N.A. | 0 |
| ZNF404       | 0,04174971  | 0,011913904  | 0 | N.A. | 0 |
| ZNF121       | 0,041749018 | -0,002925703 | 0 | N.A. | 0 |
| CITF22-1A6.3 | 0,04173679  | 0,093783972  | 0 | N.A. | 0 |
| RP3-508I15.1 | 0,041728327 | 0,213740669  | 0 | N.A. | 0 |

|             |             |              |   |      |   |
|-------------|-------------|--------------|---|------|---|
| LINC00941   | 0,041711223 | -0,181454237 | 0 | N.A. | 0 |
| AP001258.4  | 0,04168587  | 0,068203048  | 0 | N.A. | 0 |
| TAGLN3      | 0,041664209 |              | 0 | N.A. | 0 |
| TLK2        | 0,041663246 | 0,136891096  | 0 | N.A. | 0 |
| PHYHD1      | 0,041637277 | 0,090867301  | 0 | N.A. | 0 |
| LGALS7B     | 0,041548114 | 0,199666532  | 0 | N.A. | 0 |
| RP11-384C4. | 0,041521431 |              | 0 | N.A. | 0 |
| ZC4H2       | 0,041487757 | -0,047964412 | 0 | N.A. | 0 |
| SEMG1       | 0,041486502 | -0,147421079 | 0 | N.A. | 0 |
| RDH16       | 0,041447906 | 0,160242887  | 0 | N.A. | 0 |
| DMBX1       | 0,041413974 | -0,025905335 | 0 | N.A. | 0 |
| RAB44       | 0,041410284 |              | 0 | N.A. | 0 |
| RP11-138C9. | 0,041398843 | -0,060611892 | 0 | N.A. | 0 |
| TP53I11     | 0,041392296 | 0,05013641   | 0 | N.A. | 0 |
| PCDHGA8     | 0,041390811 | 0,308170505  | 0 | N.A. | 0 |
| RETN        | 0,041384703 |              | 0 | N.A. | 0 |
| AC005757.6  | 0,041377301 |              | 0 | N.A. | 0 |
| IL4I1       | 0,04136965  | -0,143080254 | 0 | N.A. | 0 |
| USP9Y       | 0,041363903 | 0,089057697  | 0 | N.A. | 0 |
| AC073046.25 | 0,041363526 | -0,086997116 | 0 | N.A. | 0 |
| COL7A1      | 0,041286735 | 0,277151037  | 0 | N.A. | 0 |
| GPR158      | 0,041281121 | 0,098711071  | 0 | N.A. | 0 |
| RP11-981G7. | 0,041273923 |              | 0 | N.A. | 0 |
| FSTL1       | 0,041226182 | -0,085561952 | 0 | N.A. | 0 |
| RP11-46H11. | 0,041223013 |              | 0 | N.A. | 0 |
| FHL1        | 0,041192203 | 0,094616759  | 0 | N.A. | 0 |
| RP11-432J22 | 0,041156245 | -0,319852255 | 0 | N.A. | 0 |
| RECQL5      | 0,041144251 | 0,327322628  | 0 | N.A. | 0 |
| LRRC16B     | 0,041138675 | 0,008583826  | 0 | N.A. | 0 |
| NFKB1       | 0,041104574 | 0,092124742  | 0 | N.A. | 0 |
| LINC01449   | 0,041099389 |              | 0 | N.A. | 0 |
| RP11-522I20 | 0,041093798 | -0,086231948 | 0 | N.A. | 0 |
| C12orf50    | 0,040992858 | 0,146165371  | 0 | N.A. | 0 |

|             |             |              |   |      |   |
|-------------|-------------|--------------|---|------|---|
| B4GALNT2    | 0,040989392 | 0,181718014  | 0 | N.A. | 0 |
| ZNF23       | 0,040971992 | -0,216682979 | 0 | N.A. | 0 |
| MYH3        | 0,040924954 | 0,098984241  | 0 | N.A. | 0 |
| BTC         | 0,040858178 | 0,064028921  | 0 | N.A. | 0 |
| SLC5A12     | 0,040844535 | -0,109482806 | 0 | N.A. | 0 |
| IQUB        | 0,040835587 | 0,038277041  | 0 | N.A. | 0 |
| AC017002.2  | 0,040833071 | 0,231105303  | 0 | N.A. | 0 |
| ZNF438      | 0,040802529 | 0,210007216  | 0 | N.A. | 0 |
| LDLRAD2     | 0,040802202 |              | 0 | N.A. | 0 |
| PIK3C3      | 0,040764159 | 0,280673968  | 0 | N.A. | 0 |
| PIKFYVE     | 0,040748325 | 0,101141312  | 0 | N.A. | 0 |
| SEPT8       | 0,04074777  | -0,147713716 | 0 | N.A. | 0 |
| C16orf62    | 0,040740621 | -0,281001767 | 0 | N.A. | 0 |
| GADD45B     | 0,040722244 | 0,262520977  | 0 | N.A. | 0 |
| FIGF        | 0,04071229  |              | 0 | N.A. | 0 |
| SLC25A21    | 0,040688672 | 0,101302822  | 0 | N.A. | 0 |
| CLLU1       | 0,040651216 |              | 0 | N.A. | 0 |
| SEMG2       | 0,040649679 | 0,326574771  | 0 | N.A. | 0 |
| OTOGL       | 0,040612564 | -0,094501136 | 0 | N.A. | 0 |
| GAMT        | 0,040611171 |              | 0 | N.A. | 0 |
| CSNK1G2     | 0,040565455 | 0,2625935    | 0 | N.A. | 0 |
| CATSPER2    | 0,040535029 | 0,348397924  | 0 | N.A. | 0 |
| LYL1        | 0,040494572 | -0,00169474  | 0 | N.A. | 0 |
| RP11-74E22. | 0,040472199 | 0,256439795  | 0 | N.A. | 0 |
| CTD-2600O9  | 0,040471594 | 0,272708353  | 0 | N.A. | 0 |
| DLGAP1      | 0,040423867 | 0,104602294  | 0 | N.A. | 0 |
| CTC-308K20. | 0,040372147 |              | 0 | N.A. | 0 |
| RP11-90L1.8 | 0,040370311 | 0,081482611  | 0 | N.A. | 0 |
| ARSD-AS1    | 0,040326694 | 0,006634189  | 0 | N.A. | 0 |
| RP11-230G5. | 0,040317492 |              | 0 | N.A. | 0 |
| EHMT1       | 0,040312302 | 0,238516804  | 0 | N.A. | 0 |
| TRPC1       | 0,040269476 | 0,289041591  | 0 | N.A. | 0 |
| CTD-2017D1  | 0,040226696 | 0,201586703  | 0 | N.A. | 0 |

|             |             |              |   |      |   |
|-------------|-------------|--------------|---|------|---|
| PRSS53      | 0,040199309 | 0,329562827  | 0 | N.A. | 0 |
| UGT2B7      | 0,040193769 | -0,178527338 | 0 | N.A. | 0 |
| RP11-396F22 | 0,040160837 |              | 0 | N.A. | 0 |
| SYNPR-AS1   | 0,040156495 | -0,032669774 | 0 | N.A. | 0 |
| RGS17       | 0,040147755 | 0,061478769  | 0 | N.A. | 0 |
| CADPS2      | 0,04009683  | 0,015920258  | 0 | N.A. | 0 |
| FAM65C      | 0,040075502 | 0,104995292  | 0 | N.A. | 0 |
| HFE         | 0,040062186 | 0,316546573  | 0 | N.A. | 0 |
| EFNB3       | 0,040038128 |              | 0 | N.A. | 0 |
| RP11-363D14 | 0,039961112 |              | 0 | N.A. | 0 |
| OOEP        | 0,039905881 | 0,108658533  | 0 | N.A. | 0 |
| COLEC10     | 0,039789051 |              | 1 | cl1  | 0 |
| ANKRD20A4   | 0,039709891 |              | 0 | N.A. | 0 |
| POC1B       | 0,03968789  | -0,167949328 | 0 | N.A. | 0 |
| ZNF341-AS1  | 0,039666998 | 0,277622564  | 0 | N.A. | 0 |
| ITM2A       | 0,039658114 | -0,248596922 | 0 | N.A. | 0 |
| FES         | 0,03964605  | -0,097113884 | 0 | N.A. | 0 |
| FCGR3A      | 0,039633436 | 0,098592647  | 0 | N.A. | 0 |
| BEX4        | 0,039584265 | -0,18737712  | 0 | N.A. | 0 |
| RGMA        | 0,039525215 | -0,174090892 | 0 | N.A. | 0 |
| ZSWIM1      | 0,039478251 | -0,123350617 | 0 | N.A. | 0 |
| LINC00524   | 0,039445413 | -0,244473285 | 0 | N.A. | 0 |
| RP11-348P10 | 0,039371729 | 0,301979141  | 0 | N.A. | 0 |
| ZFYVE19     | 0,039344785 | 0,116403119  | 0 | N.A. | 0 |
| MNX1-AS2    | 0,039243422 | 0,134118591  | 0 | N.A. | 0 |
| LL22NC03-2H | 0,039232608 | 0,275875513  | 0 | N.A. | 0 |
| IKZF4       | 0,039203336 | -0,24110859  | 0 | N.A. | 0 |
| C9orf69     | 0,03916048  | 0,225989971  | 0 | N.A. | 0 |
| CEACAM8     | 0,039137951 | 0,241452567  | 0 | N.A. | 0 |
| C9orf172    | 0,039063907 | 0,238465444  | 0 | N.A. | 0 |
| WFS1        | 0,039054743 | 0,303481508  | 0 | N.A. | 0 |
| STK32A      | 0,039043867 |              | 0 | N.A. | 0 |
| RP11-440G5  | 0,038995153 |              | 0 | N.A. | 0 |

|             |             |              |   |      |   |
|-------------|-------------|--------------|---|------|---|
| TYW5        | 0,038978321 | 0,126074638  | 0 | N.A. | 0 |
| ANKRD27     | 0,038934895 | -0,066924774 | 0 | N.A. | 0 |
| FAM209B     | 0,038907498 | 0,019295354  | 0 | N.A. | 0 |
| RP5-875H18. | 0,038900638 | 0,090280148  | 0 | N.A. | 0 |
| PALM2       | 0,038877772 | -0,05980259  | 0 | N.A. | 0 |
| EXTL1       | 0,03878709  |              | 0 | N.A. | 0 |
| MVB12B      | 0,038784629 | -0,194495094 | 0 | N.A. | 0 |
| MOGAT1      | 0,038783414 | 0,020852719  | 0 | N.A. | 0 |
| SLC22A15    | 0,038782876 | 0,126703797  | 0 | N.A. | 0 |
| CCS         | 0,03878097  | 0,324791664  | 0 | N.A. | 0 |
| ZNF321P     | 0,038765798 | -0,152063689 | 0 | N.A. | 0 |
| CAP2        | 0,038763875 | -0,076709858 | 0 | N.A. | 0 |
| FGA         | 0,038761358 |              | 0 | N.A. | 0 |
| DGKB        | 0,038749583 |              | 0 | N.A. | 0 |
| KCNAB3      | 0,03873005  | 0,038686074  | 0 | N.A. | 0 |
| TLN1        | 0,038699025 | -0,09484452  | 0 | N.A. | 0 |
| FAM101B     | 0,038679134 | -0,021752713 | 0 | N.A. | 0 |
| MIER2       | 0,038646172 | 0,155307373  | 0 | N.A. | 0 |
| LMBR1       | 0,038632278 | -0,018398878 | 0 | N.A. | 0 |
| SLC1A5      | 0,03862023  | 0,438556979  | 0 | N.A. | 0 |
| CDK11A      | 0,038610297 | 0,106970034  | 0 | N.A. | 0 |
| CTD-3060P2  | 0,038608102 | 0,258865363  | 0 | N.A. | 0 |
| SMARCA2     | 0,038591616 | 0,1502535    | 0 | N.A. | 0 |
| TIMP4       | 0,038509031 | -0,083951572 | 0 | N.A. | 0 |
| NAA30       | 0,038505093 | 0,060016251  | 0 | N.A. | 0 |
| TMEM74B     | 0,038491516 | 0,162574107  | 0 | N.A. | 0 |
| LINC00235   | 0,038450691 | 0,02008516   | 0 | N.A. | 0 |
| RP11-227G1  | 0,038420659 | 0,063922833  | 0 | N.A. | 0 |
| RP11-321G1  | 0,038415327 | -0,054569319 | 0 | N.A. | 0 |
| EFCAB6      | 0,038396404 | -0,0742273   | 0 | N.A. | 0 |
| CCR6        | 0,038389486 | -0,11997447  | 0 | N.A. | 0 |
| CERS1       | 0,038381573 | 0,031578778  | 0 | N.A. | 0 |
| AIRE        | 0,038371144 |              | 0 | N.A. | 0 |

|              |             |              |   |      |   |
|--------------|-------------|--------------|---|------|---|
| NECAP1       | 0,038278684 | 0,197427007  | 0 | N.A. | 0 |
| XKR8         | 0,038221189 | -0,020789891 | 0 | N.A. | 0 |
| NKIRAS1      | 0,038201121 | -0,004075897 | 0 | N.A. | 0 |
| TMEM161B     | 0,038185959 | 0,104487494  | 0 | N.A. | 0 |
| AP000708.1   | 0,038137177 |              | 0 | N.A. | 0 |
| RP11-60A8.1  | 0,038135456 | -0,118168831 | 0 | N.A. | 0 |
| HAND2-AS1    | 0,038094637 | -0,044303254 | 0 | N.A. | 0 |
| GLIS2-AS1    | 0,038092184 | 0,032314066  | 0 | N.A. | 0 |
| CTB-102L5.4  | 0,03808773  | 0,179476454  | 0 | N.A. | 0 |
| ANKRD44      | 0,038087342 | -0,205794266 | 0 | N.A. | 0 |
| RP11-436K8.  | 0,038083973 |              | 0 | N.A. | 0 |
| PPP1R9B      | 0,038037077 | -0,033962089 | 0 | N.A. | 0 |
| DGCR8        | 0,038009675 | 0,227950471  | 0 | N.A. | 0 |
| CSNK1G1      | 0,038003768 | 0,157277227  | 0 | N.A. | 0 |
| RFWD2        | 0,037962745 | 0,096064302  | 0 | N.A. | 0 |
| CTDP1        | 0,03795697  | -0,065985681 | 0 | N.A. | 0 |
| RFX2         | 0,037938137 | -0,022706746 | 0 | N.A. | 0 |
| HIST1H2AK    | 0,037898213 | -0,144539615 | 0 | N.A. | 0 |
| AC008079.10  | 0,037846697 | 0,166232703  | 0 | N.A. | 0 |
| RP4-800J21.3 | 0,037800478 | 0,035901515  | 0 | N.A. | 0 |
| CERS5        | 0,0377783   | 0,043315763  | 0 | N.A. | 0 |
| LINC01068    | 0,037716157 | 0,077239807  | 0 | N.A. | 0 |
| FOXP4        | 0,037672404 | 0,291836476  | 0 | N.A. | 0 |
| SSC5D        | 0,037667555 | 0,324906067  | 0 | N.A. | 0 |
| WIPF3        | 0,037666298 | -0,093868671 | 0 | N.A. | 0 |
| HPS6         | 0,037662217 | -0,072622107 | 0 | N.A. | 0 |
| LPO          | 0,037651978 | -0,049496528 | 0 | N.A. | 0 |
| BAG5         | 0,037596514 | 0,151977779  | 0 | N.A. | 0 |
| CSNK1A1L     | 0,037581598 | 0,125373515  | 0 | N.A. | 0 |
| LURAP1       | 0,037574514 |              | 0 | N.A. | 0 |
| GATA2-AS1    | 0,037564118 | 0,070513871  | 0 | N.A. | 0 |
| LINC01170    | 0,037559824 | 0,047932409  | 0 | N.A. | 0 |
| RP11-1293J1  | 0,037507578 |              | 0 | N.A. | 0 |

|             |             |              |   |      |   |
|-------------|-------------|--------------|---|------|---|
| AC007879.2  | 0,037496231 | -0,017338627 | 0 | N.A. | 0 |
| SNAI3-AS1   | 0,037495811 | 0,17378084   | 0 | N.A. | 0 |
| SHOX2       | 0,037455983 | 0,071856897  | 0 | N.A. | 0 |
| RP3-467L1.4 | 0,037441224 | -0,091790434 | 0 | N.A. | 0 |
| AKR1B10     | 0,037427914 | 0,087597245  | 0 | N.A. | 0 |
| DEAF1       | 0,037395062 | 0,064738716  | 0 | N.A. | 0 |
| RBFOX1      | 0,037386148 |              | 0 | N.A. | 0 |
| ZNF343      | 0,037355565 | -0,051440229 | 0 | N.A. | 0 |
| GNGT2       | 0,037324331 | -0,007592587 | 0 | N.A. | 0 |
| AC015971.2  | 0,037270536 | 0,312683834  | 0 | N.A. | 0 |
| ZNF557      | 0,037209835 | -0,006056809 | 0 | N.A. | 0 |
| CFP         | 0,037200108 |              | 0 | N.A. | 0 |
| RP11-345P4. | 0,037162084 | 0,418581038  | 0 | N.A. | 0 |
| DIO2        | 0,037126073 | 0,035098787  | 0 | N.A. | 0 |
| TMEM63C     | 0,037067699 | -0,243295173 | 0 | N.A. | 0 |
| HOXD1       | 0,037059568 | 0,306498973  | 0 | N.A. | 0 |
| CLCN5       | 0,037042791 | 0,126876549  | 0 | N.A. | 0 |
| FMN1        | 0,036989059 | 0,180008794  | 0 | N.A. | 0 |
| PURA        | 0,036988003 | 0,329242879  | 0 | N.A. | 0 |
| RP11-363E6. | 0,036987009 | 0,132799983  | 0 | N.A. | 0 |
| FGF12       | 0,036956283 | -0,020015494 | 0 | N.A. | 0 |
| CTC-548K16. | 0,036941075 | -0,050748133 | 0 | N.A. | 0 |
| RNF112      | 0,036836938 |              | 0 | N.A. | 0 |
| DPH1        | 0,036773076 | -0,099507844 | 0 | N.A. | 0 |
| CTD-3128G1  | 0,036765727 |              | 0 | N.A. | 0 |
| VASN        | 0,036758073 | 0,404038044  | 0 | N.A. | 0 |
| FZD6        | 0,036714107 | 0,296114931  | 0 | N.A. | 0 |
| AC104532.4  | 0,036711877 | -0,059755392 | 0 | N.A. | 0 |
| CAMK2N2     | 0,036647152 | -0,05245725  | 0 | N.A. | 0 |
| AC097721.2  | 0,036642244 | -0,021075312 | 0 | N.A. | 0 |
| C9orf57     | 0,036602437 | -0,071792181 | 0 | N.A. | 0 |
| AC093375.1  | 0,036570871 | -0,04349788  | 0 | N.A. | 0 |
| MMP13       | 0,036569557 | -0,013200768 | 0 | N.A. | 0 |

|              |             |              |   |      |   |
|--------------|-------------|--------------|---|------|---|
| ULBP3        | 0,036559101 | -0,097726589 | 0 | N.A. | 0 |
| CCDC125      | 0,036556583 | -0,102565351 | 0 | N.A. | 0 |
| JMJD6        | 0,036515656 | -0,229097426 | 0 | N.A. | 0 |
| PP7080       | 0,036503267 | 0,130951051  | 0 | N.A. | 0 |
| RP11-334J6.7 | 0,03649828  | 0,055827894  | 0 | N.A. | 0 |
| APOBEC3B     | 0,036497777 | -0,000748349 | 0 | N.A. | 0 |
| RP11-430C7.  | 0,0364681   |              | 0 | N.A. | 0 |
| ZNF70        | 0,036429942 | -0,116108545 | 0 | N.A. | 0 |
| MAPT         | 0,036262408 | 0,128272396  | 0 | N.A. | 0 |
| FOXA3        | 0,036237074 | 0,219283086  | 0 | N.A. | 0 |
| RP11-284M1   | 0,036234126 | 0,126684386  | 0 | N.A. | 0 |
| PDGFRB       | 0,036206884 | -0,124410898 | 0 | N.A. | 0 |
| DIS3         | 0,036199679 | 0,155463649  | 0 | N.A. | 0 |
| CTC-455F18.  | 0,036194154 | -0,180450256 | 0 | N.A. | 0 |
| LINC00324    | 0,036171922 | 0,048551784  | 0 | N.A. | 0 |
| SNX7         | 0,036167544 | 0,035854418  | 0 | N.A. | 0 |
| RP13-270P17  | 0,036080953 | -0,111131125 | 0 | N.A. | 0 |
| TRMT44       | 0,036079035 | -0,21151506  | 0 | N.A. | 0 |
| RARRES2      | 0,036059461 | -0,378867159 | 0 | N.A. | 0 |
| PLEKHF1      | 0,036037836 | -0,374114097 | 0 | N.A. | 0 |
| RAP2C-AS1    | 0,036022323 | 0,098584561  | 0 | N.A. | 0 |
| MIS18A-AS1   | 0,036012855 | -0,077614022 | 0 | N.A. | 0 |
| PPP1R13B     | 0,035984839 | 0,242905749  | 0 | N.A. | 0 |
| STAG3        | 0,035957669 | -0,041610503 | 0 | N.A. | 0 |
| MORN5        | 0,035943059 | -0,267387159 | 0 | N.A. | 0 |
| RP11-46D6.1  | 0,035937846 | 0,432723375  | 0 | N.A. | 0 |
| WBSCR28      | 0,035913168 | 0,113888514  | 0 | N.A. | 0 |
| KBTBD4       | 0,035878176 | -0,066227353 | 0 | N.A. | 0 |
| RBM23        | 0,035791526 | 0,141981671  | 0 | N.A. | 0 |
| AC091801.1   | 0,035720899 | -0,083490092 | 0 | N.A. | 0 |
| APLNR        | 0,035714563 | 0,200766131  | 0 | N.A. | 0 |
| CLECL1       | 0,03571018  | -0,225163244 | 0 | N.A. | 0 |
| TUSC1        | 0,035694503 | -0,243471677 | 0 | N.A. | 0 |



|             |             |              |   |      |   |
|-------------|-------------|--------------|---|------|---|
| RP11-768F21 | 0,035681403 |              | 0 | N.A. | 0 |
| FBXO44      | 0,035661101 | 0,102133767  | 0 | N.A. | 0 |
| CELA2A      | 0,035641671 |              | 0 | N.A. | 0 |
| AC007038.7  | 0,035622411 | 0,075157046  | 0 | N.A. | 0 |
| TEX22       | 0,035617245 | -0,045461917 | 0 | N.A. | 0 |
| RP11-203H2. | 0,035611694 | 0,017171152  | 0 | N.A. | 0 |
| NBEAL2      | 0,035549707 | 0,229335069  | 0 | N.A. | 0 |
| GLRA2       | 0,035501836 |              | 0 | N.A. | 0 |
| HID1        | 0,035472851 | 0,251025491  | 0 | N.A. | 0 |
| RP4-564F22. | 0,035457148 | -0,044999068 | 0 | N.A. | 0 |
| LINC00540   | 0,035452516 | -0,120465437 | 0 | N.A. | 0 |
| RP11-800A3. | 0,035426709 | 0,078373631  | 0 | N.A. | 0 |
| CTC-209H22. | 0,035351626 | 0,158747665  | 0 | N.A. | 0 |
| RNF146      | 0,03531338  | -0,068002168 | 0 | N.A. | 0 |
| TSSK6       | 0,035298464 | -0,000555223 | 0 | N.A. | 0 |
| RP5-1186P10 | 0,035261572 | -0,045506036 | 0 | N.A. | 0 |
| SNX21       | 0,035253116 | -0,013936918 | 0 | N.A. | 0 |
| CCDC157     | 0,035181189 | 0,035821098  | 0 | N.A. | 0 |
| CYP19A1     | 0,035154855 |              | 0 | N.A. | 0 |
| LINC00869   | 0,035113126 | -0,11185571  | 0 | N.A. | 0 |
| TLL3        | 0,035049329 | 0,118433842  | 0 | N.A. | 0 |
| RP11-667K14 | 0,034974843 |              | 0 | N.A. | 0 |
| RP11-1006G1 | 0,034974062 | 0,227578377  | 0 | N.A. | 0 |
| C7orf31     | 0,034964307 | -0,029500026 | 0 | N.A. | 0 |
| CD5         | 0,034944693 | 0,047244184  | 0 | N.A. | 0 |
| SH2D4A      | 0,034889979 | 0,393203825  | 0 | N.A. | 0 |
| SENP2       | 0,034878804 | 0,096874019  | 0 | N.A. | 0 |
| CTD-2013N2  | 0,034867952 | -0,045397069 | 0 | N.A. | 0 |
| RP13-131K19 | 0,034853601 | -0,172731386 | 0 | N.A. | 0 |
| RP3-475N16. | 0,034799441 | 0,106916349  | 0 | N.A. | 0 |
| RP4-625H18. | 0,034782534 | 0,055038331  | 0 | N.A. | 0 |
| ZNF616      | 0,034772698 | -0,020485192 | 0 | N.A. | 0 |
| C3orf35     | 0,034772338 | 0,153977909  | 0 | N.A. | 0 |

|              |             |              |   |      |   |
|--------------|-------------|--------------|---|------|---|
| ATP6V0C      | 0,034764988 | 0,162595999  | 0 | N.A. | 0 |
| MAML3        | 0,034708882 | 0,208254101  | 0 | N.A. | 0 |
| CYP27C1      | 0,034705789 | 0,128064066  | 0 | N.A. | 0 |
| CPNE9        | 0,034686648 | -0,14963029  | 0 | N.A. | 0 |
| DLC1         | 0,034682989 | -0,068632741 | 0 | N.A. | 0 |
| DLGAP1-AS2   | 0,034637548 | -0,11406037  | 0 | N.A. | 0 |
| LA16c-358B7  | 0,034604688 | -0,125267546 | 0 | N.A. | 0 |
| AC007128.1   | 0,03458968  | -0,075643239 | 0 | N.A. | 0 |
| NBPF11       | 0,034588914 | 0,118123663  | 0 | N.A. | 0 |
| ZNF396       | 0,034571642 | -0,110415606 | 0 | N.A. | 0 |
| MYO5A        | 0,034545285 | 0,335769017  | 0 | N.A. | 0 |
| FAM186B      | 0,034535673 | 0,133904438  | 0 | N.A. | 0 |
| CD38         | 0,034532029 | -0,101049601 | 0 | N.A. | 0 |
| AC159540.1   | 0,034521675 | 0,247601754  | 0 | N.A. | 0 |
| HLA-DQA1     | 0,034494405 | -0,352226755 | 0 | N.A. | 0 |
| INPP5E       | 0,03449089  | 0,018468558  | 0 | N.A. | 0 |
| TNFSF12      | 0,034478616 | -0,187933243 | 0 | N.A. | 0 |
| RP11-39404   | 0,034463045 | -0,088010483 | 0 | N.A. | 0 |
| RP11-48G14   | 0,034456938 | -0,13423057  | 0 | N.A. | 0 |
| RP11-347C12  | 0,034429097 | -0,100251144 | 0 | N.A. | 0 |
| ACTN2        | 0,034385738 | -0,055617827 | 0 | N.A. | 0 |
| ANKHD1       | 0,034384058 | 0,076932784  | 0 | N.A. | 0 |
| TMEM171      | 0,034383008 | 0,059417876  | 0 | N.A. | 0 |
| RP13-216E22  | 0,034360823 | 0,00531646   | 0 | N.A. | 0 |
| RP11-533E19  | 0,034359944 | -0,015861564 | 0 | N.A. | 0 |
| MLX          | 0,034344467 | 0,399360365  | 0 | N.A. | 0 |
| DAAM2        | 0,034322631 | -0,049688007 | 0 | N.A. | 0 |
| RFTN1        | 0,034317152 | -0,040387737 | 0 | N.A. | 0 |
| CHST11       | 0,034316268 | -0,004747702 | 0 | N.A. | 0 |
| PAPD4        | 0,034303207 | -0,025017563 | 0 | N.A. | 0 |
| RP11-393I2.4 | 0,034298583 | 0,179779969  | 0 | N.A. | 0 |
| RP11-1277A3  | 0,034258555 | 0,414226354  | 0 | N.A. | 0 |
| NAIF1        | 0,034220725 | -0,087630272 | 0 | N.A. | 0 |

|               |             |              |   |      |   |
|---------------|-------------|--------------|---|------|---|
| TRAPPC12-AS1  | 0,034201003 | -0,026235528 | 0 | N.A. | 0 |
| IREB2         | 0,034176421 | 0,242271321  | 0 | N.A. | 0 |
| DHRX          | 0,034172015 | 0,000870085  | 0 | N.A. | 0 |
| RP11-259K5.1  | 0,034111565 | 0,363817778  | 0 | N.A. | 0 |
| UCN3          | 0,03411091  | -0,217825741 | 0 | N.A. | 0 |
| RP3-508I15.1  | 0,034108193 |              | 0 | N.A. | 0 |
| LINC01001     | 0,034106899 | 0,276440761  | 0 | N.A. | 0 |
| RP11-195C7.1  | 0,034076431 | -0,069623726 | 0 | N.A. | 0 |
| MMP3          | 0,034047977 | -0,26624711  | 0 | N.A. | 0 |
| ZCCHC24       | 0,03398995  | -0,026405847 | 0 | N.A. | 0 |
| MERTK         | 0,033969441 |              | 0 | N.A. | 0 |
| CTD-2005H7.1  | 0,033950682 |              | 0 | N.A. | 0 |
| NPIPA1        | 0,033879006 | -0,030400658 | 0 | N.A. | 0 |
| LOXL1-AS1     | 0,03386964  | -0,030574007 | 0 | N.A. | 0 |
| ARHGEF17      | 0,033869532 | 0,19653849   | 0 | N.A. | 0 |
| EIF4EBP3      | 0,033848376 | -0,123154004 | 0 | N.A. | 0 |
| LINC00662     | 0,03381338  | -0,0066826   | 0 | N.A. | 0 |
| ZNF529        | 0,033696604 | -0,030912272 | 0 | N.A. | 0 |
| RP11-452L6.1  | 0,033693236 | 0,039821545  | 0 | N.A. | 0 |
| RAB11B-AS1    | 0,033685151 | -0,132519208 | 0 | N.A. | 0 |
| RP11-1114A5.1 | 0,03367688  | 0,09746014   | 0 | N.A. | 0 |
| CTA-228A9.3   | 0,033676636 | 0,082206614  | 0 | N.A. | 0 |
| ZNF653        | 0,033653505 | -0,044565843 | 0 | N.A. | 0 |
| LDB3          | 0,03365312  |              | 0 | N.A. | 0 |
| CDRT4         | 0,033627777 | 0,169065021  | 0 | N.A. | 0 |
| KIF26B        | 0,033577882 | -0,042949763 | 0 | N.A. | 0 |
| RBM12B        | 0,033444514 | 0,001070996  | 0 | N.A. | 0 |
| ESYT3         | 0,033444154 | -0,187990804 | 0 | N.A. | 0 |
| LMCD1-AS1     | 0,033441218 | 0,117758558  | 0 | N.A. | 0 |
| ZBTB25        | 0,033362235 | 0,195111495  | 0 | N.A. | 0 |
| AQP6          | 0,033362058 |              | 0 | N.A. | 0 |
| REG4          | 0,033343171 | 0,199883373  | 0 | N.A. | 0 |
| USO1          | 0,033339699 | 0,331154702  | 0 | N.A. | 0 |

|             |             |              |   |      |   |
|-------------|-------------|--------------|---|------|---|
| RP11-712B9. | 0,033316817 | -0,029281239 | 0 | N.A. | 0 |
| RP11-168O1  | 0,033277488 |              | 0 | N.A. | 0 |
| AC006004.1  | 0,033270045 | 0,194067119  | 0 | N.A. | 0 |
| CELSR3-AS1  | 0,033266695 |              | 0 | N.A. | 0 |
| ATP13A3     | 0,03325695  | 0,220886616  | 0 | N.A. | 0 |
| HNRNPU-AS1  | 0,033241351 | 0,242756508  | 0 | N.A. | 0 |
| WDR31       | 0,033206214 | -0,174134281 | 0 | N.A. | 0 |
| TSC22D1-AS1 | 0,033186693 | -0,109515401 | 0 | N.A. | 0 |
| PLD5        | 0,033181963 | -0,308079787 | 0 | N.A. | 0 |
| BMP3        | 0,033148066 |              | 0 | N.A. | 0 |
| KCNMB3      | 0,033105136 | 0,199432364  | 0 | N.A. | 0 |
| VMAC        | 0,033088284 | 0,089663581  | 0 | N.A. | 0 |
| ERN2        | 0,033068475 | 0,19652859   | 0 | N.A. | 0 |
| IGHV3-74    | 0,033047145 |              | 0 | N.A. | 0 |
| XCL2        | 0,033043419 |              | 0 | N.A. | 0 |
| TSLP        | 0,033019117 | -0,17332353  | 0 | N.A. | 0 |
| VSIG10L     | 0,033016533 | 0,352434293  | 0 | N.A. | 0 |
| CATSPER3    | 0,033015699 | 0,024350113  | 0 | N.A. | 0 |
| VKORC1L1    | 0,033008015 | 0,256007595  | 0 | N.A. | 0 |
| SMC5-AS1    | 0,032998633 | -0,301288013 | 0 | N.A. | 0 |
| YY2         | 0,032983393 | 0,165834708  | 0 | N.A. | 0 |
| ZNF680      | 0,032978275 | 0,183249441  | 0 | N.A. | 0 |
| HES5        | 0,032969159 | 0,067041463  | 0 | N.A. | 0 |
| TMEM234     | 0,032945104 | 0,106919868  | 0 | N.A. | 0 |
| SLC31A1     | 0,032935257 | 0,151530645  | 0 | N.A. | 0 |
| RP13-638C3. | 0,032892615 | 0,057006712  | 0 | N.A. | 0 |
| ZNF233      | 0,032848566 | -0,047350925 | 0 | N.A. | 0 |
| RP11-66B24. | 0,032824212 | -0,190501991 | 0 | N.A. | 0 |
| RP1-65J11.1 | 0,032812411 | -0,138379721 | 0 | N.A. | 0 |
| FOXN1       | 0,032811615 | 0,021956489  | 0 | N.A. | 0 |
| HSD17B14    | 0,032794859 | -0,222119056 | 0 | N.A. | 0 |
| AC005253.2  | 0,032793118 | -0,083841005 | 0 | N.A. | 0 |
| PIPOX       | 0,032761303 | -0,00060493  | 0 | N.A. | 0 |

|              |             |              |   |      |   |
|--------------|-------------|--------------|---|------|---|
| FRRS1        | 0,032737354 | 0,005332148  | 0 | N.A. | 0 |
| TMEM163      | 0,032715336 | -0,106069038 | 0 | N.A. | 0 |
| KB-1125A3.1  | 0,032709055 | 0,028044813  | 0 | N.A. | 0 |
| IGKV1-17     | 0,03268993  | -0,287041343 | 0 | N.A. | 0 |
| GRAPL        | 0,032686469 |              | 0 | N.A. | 0 |
| RP3-508I15.9 | 0,032676303 | -0,072871766 | 0 | N.A. | 0 |
| MSANTD1      | 0,03264931  | 0,070347577  | 0 | N.A. | 0 |
| ARL4A        | 0,032634725 | 0,177483568  | 0 | N.A. | 0 |
| HSPB3        | 0,03263022  | 0,372622198  | 0 | N.A. | 0 |
| CBX6         | 0,032622413 | 0,097995572  | 0 | N.A. | 0 |
| POM121       | 0,032622143 | 0,141437137  | 0 | N.A. | 0 |
| MAP2K5       | 0,032565664 | -0,119666722 | 0 | N.A. | 0 |
| RP11-354E11  | 0,032557299 | -0,105425003 | 0 | N.A. | 0 |
| TMEM145      | 0,032554555 | -0,189144087 | 0 | N.A. | 0 |
| GLDN         | 0,032503781 | 0,024631035  | 0 | N.A. | 0 |
| AC106900.6   | 0,03250007  |              | 0 | N.A. | 0 |
| PPP1R3F      | 0,032495054 | -0,118995483 | 0 | N.A. | 0 |
| CPXM1        | 0,032489395 | -0,063026766 | 0 | N.A. | 0 |
| CD160        | 0,03248939  | 0,05059413   | 0 | N.A. | 0 |
| PYGM         | 0,032455546 | 0,122334311  | 0 | N.A. | 0 |
| RP11-700J17  | 0,032453084 | 0,125389303  | 0 | N.A. | 0 |
| ABO          | 0,03237394  | 0,24379813   | 0 | N.A. | 0 |
| FOXD2-AS1    | 0,032364858 | -0,126031586 | 0 | N.A. | 0 |
| C16orf71     | 0,032364174 | 0,182077649  | 0 | N.A. | 0 |
| TFEC         | 0,032351136 | -0,28915815  | 0 | N.A. | 0 |
| SPTLC2       | 0,032296846 | 0,625414331  | 0 | N.A. | 0 |
| PLEK         | 0,03228301  | 0,010147516  | 0 | N.A. | 0 |
| RP11-98D18.  | 0,032201602 | -0,060508802 | 0 | N.A. | 0 |
| LINC01212    | 0,032192541 |              | 0 | N.A. | 0 |
| NAPSA        | 0,032183418 | 0,210495439  | 0 | N.A. | 0 |
| M1AP         | 0,03218159  | 0,145114787  | 0 | N.A. | 0 |
| HOPX         | 0,032133594 | 0,037870233  | 0 | N.A. | 0 |
| AL365181.2   | 0,032095575 | 0,218981406  | 0 | N.A. | 0 |

|              |             |              |   |      |   |
|--------------|-------------|--------------|---|------|---|
| IGLV3-10     | 0,032088785 |              | 0 | N.A. | 0 |
| TANC2        | 0,032060602 | 0,243189096  | 0 | N.A. | 0 |
| C7orf25      | 0,032032614 | -0,365175704 | 0 | N.A. | 0 |
| PRF1         | 0,032026427 | 0,059842022  | 0 | N.A. | 0 |
| ANKMY2       | 0,032025602 | 0,001228128  | 0 | N.A. | 0 |
| DMBT1        | 0,032005571 | 0,019676303  | 0 | N.A. | 0 |
| EBI3         | 0,031986219 |              | 0 | N.A. | 0 |
| KRTAP4-1     | 0,031966392 | 0,237079807  | 0 | N.A. | 0 |
| HOXB-AS1     | 0,031953344 | -0,033821428 | 0 | N.A. | 0 |
| TTC37        | 0,031939326 | 0,043732825  | 0 | N.A. | 0 |
| TTC39C-AS1   | 0,031938385 |              | 0 | N.A. | 0 |
| SNX4         | 0,031925987 | -0,104739942 | 0 | N.A. | 0 |
| FALEC        | 0,031915502 | 0,013548433  | 0 | N.A. | 0 |
| ZNF793       | 0,031887644 | -0,068599816 | 0 | N.A. | 0 |
| DPF3         | 0,031879569 | 0,003500256  | 0 | N.A. | 0 |
| CDON         | 0,031769929 | 0,031659846  | 0 | N.A. | 0 |
| PRKCG        | 0,031738302 | -0,049562048 | 0 | N.A. | 0 |
| HLA-DQB2     | 0,031710523 |              | 0 | N.A. | 0 |
| FAM208A      | 0,031673349 | 0,206359704  | 0 | N.A. | 0 |
| KIAA1958     | 0,0316504   | -0,188572032 | 0 | N.A. | 0 |
| KCTD21-AS1   | 0,031617477 | 0,154575741  | 0 | N.A. | 0 |
| P2RY1        | 0,031588861 | -0,101777537 | 0 | N.A. | 0 |
| LTN1         | 0,03158172  | 0,197590589  | 0 | N.A. | 0 |
| PJA1         | 0,031550878 | -0,055959137 | 0 | N.A. | 0 |
| EDA2R        | 0,031498439 |              | 0 | N.A. | 0 |
| VASH1        | 0,031456703 | -0,195356412 | 0 | N.A. | 0 |
| ZNF578       | 0,031435959 | 0,171092318  | 0 | N.A. | 0 |
| RP11-30K9.6  | 0,031423965 | -0,266886029 | 0 | N.A. | 0 |
| DEC1         | 0,03141442  |              | 0 | N.A. | 0 |
| CCDC23       | 0,031409054 | 0,12036085   | 0 | N.A. | 0 |
| RP11-165J3.6 | 0,031374465 | -0,041761932 | 0 | N.A. | 0 |
| AC004980.11  | 0,031364825 | 0,072097382  | 0 | N.A. | 0 |
| OSER1-AS1    | 0,031348649 | -0,085416664 | 0 | N.A. | 0 |

|             |             |              |   |      |   |
|-------------|-------------|--------------|---|------|---|
| CTD-2574D2  | 0,031283297 |              | 0 | N.A. | 0 |
| PTOV1-AS1   | 0,03125529  | 0,078767149  | 0 | N.A. | 0 |
| FAM21C      | 0,031245676 | 0,274110851  | 0 | N.A. | 0 |
| CPSF7       | 0,031239659 | 0,042989274  | 0 | N.A. | 0 |
| AC092669.3  | 0,031208998 | 0,196424055  | 0 | N.A. | 0 |
| CFAP44      | 0,03120622  | 0,066035794  | 0 | N.A. | 0 |
| RP11-10070  | 0,03120391  | -0,011373925 | 0 | N.A. | 0 |
| TSPAN10     | 0,031158261 | -0,092357933 | 0 | N.A. | 0 |
| IPCEF1      | 0,031157876 | 0,00402868   | 0 | N.A. | 0 |
| RP13-977J11 | 0,031155454 | 0,260875845  | 0 | N.A. | 0 |
| SCMH1       | 0,031137137 | -0,253419664 | 0 | N.A. | 0 |
| FN3K        | 0,031115696 | 0,253417551  | 0 | N.A. | 0 |
| STRN        | 0,031049615 | -0,022840331 | 0 | N.A. | 0 |
| TBC1D12     | 0,031047469 | -0,028090992 | 0 | N.A. | 0 |
| GALNT4      | 0,031010832 | 0,002584294  | 0 | N.A. | 0 |
| RP11-796E10 | 0,030994161 | -0,107687351 | 0 | N.A. | 0 |
| RP11-378J18 | 0,030986783 |              | 0 | N.A. | 0 |
| AC004076.5  | 0,030950568 | 0,337447321  | 0 | N.A. | 0 |
| RP3-416H24  | 0,030943583 | 0,026821521  | 0 | N.A. | 0 |
| RP1-50J22.4 | 0,030940343 |              | 0 | N.A. | 0 |
| HIST1H1E    | 0,030881944 | -0,194981737 | 0 | N.A. | 0 |
| RTN4RL2     | 0,030864448 | 0,003634315  | 0 | N.A. | 0 |
| ITPKB-AS1   | 0,030849689 |              | 0 | N.A. | 0 |
| C8orf89     | 0,030842718 |              | 0 | N.A. | 0 |
| F13A1       | 0,030839778 | -0,005883238 | 0 | N.A. | 0 |
| RHPN1-AS1   | 0,030770754 | 0,063766285  | 0 | N.A. | 0 |
| SLC6A4      | 0,030732634 | 0,070460679  | 0 | N.A. | 0 |
| CTD-3075F15 | 0,030727358 | -0,11239796  | 0 | N.A. | 0 |
| THUMPD3-A   | 0,030713721 | 0,103716752  | 0 | N.A. | 0 |
| EDC3        | 0,030713557 | 0,07395209   | 0 | N.A. | 0 |
| RP11-809N8  | 0,03070481  | 0,02386129   | 0 | N.A. | 0 |
| AKIRIN1     | 0,030666676 | -0,066540116 | 0 | N.A. | 0 |
| CRKL        | 0,030650114 | -0,070303186 | 0 | N.A. | 0 |

|              |             |              |   |      |   |
|--------------|-------------|--------------|---|------|---|
| GSN-AS1      | 0,030610551 |              | 0 | N.A. | 0 |
| RP11-692D12  | 0,030582393 | 0,073543388  | 0 | N.A. | 0 |
| CLEC10A      | 0,030570036 |              | 0 | N.A. | 0 |
| RNPC3        | 0,03056425  | 0,306771019  | 0 | N.A. | 0 |
| BPI          | 0,030550019 |              | 0 | N.A. | 0 |
| AGBL2        | 0,030529629 | -0,071504395 | 0 | N.A. | 0 |
| ZNF385C      | 0,030505947 | -0,230695572 | 0 | N.A. | 0 |
| TNNC2        | 0,030496798 | 0,044276669  | 0 | N.A. | 0 |
| DCUN1D1      | 0,030495638 | -0,080429184 | 0 | N.A. | 0 |
| GABARAPL2    | 0,030464385 | 0,109325987  | 0 | N.A. | 0 |
| RP11-481J2.3 | 0,030439625 | -0,095545779 | 0 | N.A. | 0 |
| GPR160       | 0,030431651 | -0,003219314 | 0 | N.A. | 0 |
| CTD-2568A17  | 0,030406812 |              | 0 | N.A. | 0 |
| ITPRIP       | 0,030336217 | 0,142524257  | 0 | N.A. | 0 |
| AE000662.92  | 0,030312701 |              | 0 | N.A. | 0 |
| ARL4D        | 0,030308766 | -0,15489023  | 0 | N.A. | 0 |
| CHRNA7       | 0,030297603 | 0,052589963  | 0 | N.A. | 0 |
| IL11         | 0,030294214 | 0,395717096  | 0 | N.A. | 0 |
| C9orf16      | 0,030240576 | -0,077736597 | 0 | N.A. | 0 |
| CDH26        | 0,030219672 |              | 0 | N.A. | 0 |
| AC010127.3   | 0,030216431 |              | 0 | N.A. | 0 |
| UGT2A3       | 0,030189982 | -0,092970468 | 0 | N.A. | 0 |
| LAT          | 0,030174994 | 0,133629092  | 0 | N.A. | 0 |
| LARP1B       | 0,030133957 | 0,173890085  | 0 | N.A. | 0 |
| TMED1        | 0,030117029 | 0,230803144  | 0 | N.A. | 0 |
| AVIL         | 0,03011546  | 0,247407849  | 0 | N.A. | 0 |
| TOPORS-AS1   | 0,030112346 | -0,000694392 | 0 | N.A. | 0 |
| C19orf38     | 0,030112271 | 0,08346109   | 0 | N.A. | 0 |
| AZGP1        | 0,030096457 | 0,388419231  | 0 | N.A. | 0 |
| UBN1         | 0,030064998 | 0,313526279  | 0 | N.A. | 0 |
| DYNLRB2      | 0,030047043 | -0,162277345 | 0 | N.A. | 0 |
| TFG          | 0,030028974 | 0,393305136  | 0 | N.A. | 0 |
| AC068499.10  | 0,02991921  |              | 0 | N.A. | 0 |



|             |             |              |   |      |   |
|-------------|-------------|--------------|---|------|---|
| RP11-160H2  | 0,029907314 |              | 0 | N.A. | 0 |
| RP11-307B6  | 0,029873641 | 0,06195142   | 0 | N.A. | 0 |
| MYLK3       | 0,029870193 | 0,116979116  | 0 | N.A. | 0 |
| ANKRD49     | 0,029828277 | 0,054652953  | 0 | N.A. | 0 |
| ZBTB37      | 0,029816482 | -0,036719595 | 0 | N.A. | 0 |
| TFRC        | 0,029815164 | 0,31886016   | 0 | N.A. | 0 |
| CBFA2T2     | 0,029764207 | 0,079607937  | 0 | N.A. | 0 |
| SLC24A3     | 0,029717931 | 0,004776541  | 0 | N.A. | 0 |
| RP11-547D2  | 0,029680023 | -0,237828663 | 0 | N.A. | 0 |
| RP11-299G2  | 0,029667797 | 0,234296469  | 0 | N.A. | 0 |
| TNMD        | 0,029642248 | -0,273236942 | 0 | N.A. | 0 |
| RP11-706O1  | 0,02961384  |              | 0 | N.A. | 0 |
| FCN3        | 0,029600138 | 0,037528515  | 0 | N.A. | 0 |
| FAM222A     | 0,029594664 | -0,153539444 | 0 | N.A. | 0 |
| GS1-166A23  | 0,029588722 |              | 0 | N.A. | 0 |
| IL21R       | 0,029549612 |              | 0 | N.A. | 0 |
| NRAP        | 0,029533909 | 0,026283336  | 0 | N.A. | 0 |
| AIF1        | 0,029496218 | -0,168610509 | 0 | N.A. | 0 |
| HPSE        | 0,029465557 | 0,258224001  | 0 | N.A. | 0 |
| RP11-649G1  | 0,029459928 | 0,129858852  | 0 | N.A. | 0 |
| CTD-2528L19 | 0,029368292 | -0,187377169 | 0 | N.A. | 0 |
| NCALD       | 0,029346334 | -0,045236562 | 0 | N.A. | 0 |
| RP11-1060G  | 0,02930772  |              | 0 | N.A. | 0 |
| RAB11A      | 0,029275456 | 0,000871081  | 0 | N.A. | 0 |
| UBXN11      | 0,029262881 | -0,066297183 | 0 | N.A. | 0 |
| INTS6       | 0,029261148 | 0,314287018  | 0 | N.A. | 0 |
| NEBL-AS1    | 0,029247766 | 0,085140004  | 0 | N.A. | 0 |
| SLC47A1     | 0,029242937 |              | 0 | N.A. | 0 |
| GPR144      | 0,029238936 |              | 0 | N.A. | 0 |
| RARB        | 0,029237442 |              | 0 | N.A. | 0 |
| FCAR        | 0,029236422 |              | 0 | N.A. | 0 |
| SLC16A14    | 0,029235787 | 0,274705285  | 0 | N.A. | 0 |
| MCTP1       | 0,029201779 | -0,207913076 | 0 | N.A. | 0 |

|             |             |              |   |      |   |
|-------------|-------------|--------------|---|------|---|
| LMBRD2      | 0,029168642 | 0,209935062  | 0 | N.A. | 0 |
| CTD-2587M2  | 0,029155622 | 0,009735997  | 0 | N.A. | 0 |
| RP3-355L5.5 | 0,029098912 | 0,230597364  | 0 | N.A. | 0 |
| CNOT4       | 0,029089024 | 0,108151623  | 0 | N.A. | 0 |
| BCL2L13     | 0,029060884 | -0,008516194 | 0 | N.A. | 0 |
| LINC00304   | 0,029033925 |              | 0 | N.A. | 0 |
| CLINT1      | 0,028978798 | 0,33204669   | 0 | N.A. | 0 |
| BATF3       | 0,028972945 | -0,017414213 | 0 | N.A. | 0 |
| ZNF337-AS1  | 0,028928322 | -0,275863394 | 0 | N.A. | 0 |
| ZBTB11      | 0,028924213 | 0,064667759  | 0 | N.A. | 0 |
| TLR10       | 0,028920835 | -0,144327963 | 0 | N.A. | 0 |
| WDR81       | 0,028897908 | 0,264516422  | 0 | N.A. | 0 |
| SLFN13      | 0,028893723 | -0,31590888  | 0 | N.A. | 0 |
| MAP3K3      | 0,028882959 | 0,091798041  | 0 | N.A. | 0 |
| STX18-AS1   | 0,02886798  | -0,111571663 | 0 | N.A. | 0 |
| RP11-1348G1 | 0,028865333 | 0,267838221  | 0 | N.A. | 0 |
| RP11-347C12 | 0,028829971 | 0,254539502  | 0 | N.A. | 0 |
| RP11-396B14 | 0,028810355 | 0,206136542  | 0 | N.A. | 0 |
| CYP3A43     | 0,028709329 |              | 0 | N.A. | 0 |
| DKKL1       | 0,028693877 |              | 0 | N.A. | 0 |
| LEMD2       | 0,028689942 | 0,21628229   | 0 | N.A. | 0 |
| SOWAHD      | 0,02867372  | 0,311981595  | 0 | N.A. | 0 |
| CEP85L      | 0,028650071 | -0,083961277 | 0 | N.A. | 0 |
| ZBTB26      | 0,028621525 | -0,113562143 | 0 | N.A. | 0 |
| FGFR1       | 0,028611007 | -0,174505937 | 0 | N.A. | 0 |
| CLDN16      | 0,028610875 | -0,273837676 | 0 | N.A. | 0 |
| CNOT2       | 0,028610575 | 0,288907075  | 0 | N.A. | 0 |
| LRP12       | 0,028608849 | 0,149071524  | 0 | N.A. | 0 |
| FAM171A2    | 0,028586858 |              | 0 | N.A. | 0 |
| SLC19A2     | 0,028581168 | 0,134895337  | 0 | N.A. | 0 |
| RP11-715J22 | 0,028580941 | 0,008493465  | 0 | N.A. | 0 |
| FOXP1       | 0,028554014 | 0,175417251  | 0 | N.A. | 0 |
| AC137934.1  | 0,028528126 | -0,040160303 | 0 | N.A. | 0 |

|             |             |              |   |      |   |
|-------------|-------------|--------------|---|------|---|
| CCDC183     | 0,028490755 | 0,04372345   | 0 | N.A. | 0 |
| GNG10       | 0,028461479 | -0,102433154 | 0 | N.A. | 0 |
| SCAND1      | 0,028419443 | 0,057957501  | 0 | N.A. | 0 |
| DMGDH       | 0,02840658  | 0,054574867  | 0 | N.A. | 0 |
| AC016738.4  | 0,028405063 |              | 0 | N.A. | 0 |
| LENG9       | 0,028388608 | 0,25125698   | 0 | N.A. | 0 |
| IL12A       | 0,028382567 | 0,038020906  | 0 | N.A. | 0 |
| RP4-545C24. | 0,02831924  |              | 0 | N.A. | 0 |
| MEMO1       | 0,028315497 | -0,024533386 | 0 | N.A. | 0 |
| PLA2G2C     | 0,028308754 |              | 0 | N.A. | 0 |
| SEC16B      | 0,028287838 | 0,132073476  | 0 | N.A. | 0 |
| RP11-45A17. | 0,028262067 | -0,044767076 | 0 | N.A. | 0 |
| RP11-219B4. | 0,028249752 | 0,030385504  | 0 | N.A. | 0 |
| CLEC18A     | 0,028244773 |              | 0 | N.A. | 0 |
| CTC-480C2.1 | 0,028131281 | -0,062955222 | 0 | N.A. | 0 |
| RP11-264B17 | 0,028125557 | 0,120159069  | 0 | N.A. | 0 |
| CARF        | 0,028117126 | -0,144878978 | 0 | N.A. | 0 |
| ZNF33B      | 0,02811259  | -0,057012579 | 0 | N.A. | 0 |
| FGF7        | 0,02807005  | -0,219156997 | 0 | N.A. | 0 |
| TMEM232     | 0,028044576 | 0,114691793  | 0 | N.A. | 0 |
| MAFIP       | 0,028043685 | -0,092286758 | 0 | N.A. | 0 |
| CTNNA2      | 0,028004192 | -0,143738911 | 0 | N.A. | 0 |
| RP11-817O13 | 0,027972838 | -0,159902328 | 0 | N.A. | 0 |
| RP11-486O13 | 0,027967873 | -0,154751846 | 0 | N.A. | 0 |
| CHI3L1      | 0,027957438 | 0,131294413  | 0 | N.A. | 0 |
| AC093159.1  | 0,027953759 | -0,085065704 | 0 | N.A. | 0 |
| SLC7A10     | 0,027935151 |              | 0 | N.A. | 0 |
| KIR2DL4     | 0,027884044 |              | 0 | N.A. | 0 |
| KLHL41      | 0,027872124 |              | 0 | N.A. | 0 |
| SLC25A16    | 0,027827013 | -0,004011337 | 0 | N.A. | 0 |
| SYK         | 0,027822072 | 0,055407412  | 0 | N.A. | 0 |
| PARD3-AS1   | 0,02781246  | 0,129907836  | 0 | N.A. | 0 |
| RP11-21L1.1 | 0,027804349 | -2,57483E-05 | 0 | N.A. | 0 |

|              |             |              |   |      |   |
|--------------|-------------|--------------|---|------|---|
| GNPTAB       | 0,027802342 | -0,073716894 | 0 | N.A. | 0 |
| FAM83C       | 0,027797318 | -0,276747189 | 0 | N.A. | 0 |
| TAS2R4       | 0,027795772 | 0,227161836  | 0 | N.A. | 0 |
| TBXA2R       | 0,027788805 | -0,044601153 | 0 | N.A. | 0 |
| ZNF333       | 0,027787277 | 0,047865707  | 0 | N.A. | 0 |
| TBC1D2B      | 0,027764028 | 0,042497337  | 0 | N.A. | 0 |
| NELL2        | 0,027762968 |              | 0 | N.A. | 0 |
| NTF3         | 0,027754083 |              | 0 | N.A. | 0 |
| RP11-294N21  | 0,027731019 |              | 0 | N.A. | 0 |
| CLK2         | 0,027689324 | 0,022414832  | 0 | N.A. | 0 |
| CTB-13F3.1   | 0,02766379  | -0,004504226 | 0 | N.A. | 0 |
| ZNF671       | 0,027614146 | -0,080170565 | 0 | N.A. | 0 |
| RP11-509J21  | 0,027582042 | -0,106571248 | 0 | N.A. | 0 |
| RP11-158I9.8 | 0,027566005 | -0,082138822 | 0 | N.A. | 0 |
| L3MBTL1      | 0,027561404 | 0,030337701  | 0 | N.A. | 0 |
| BTBD1        | 0,027539409 | -0,117348953 | 0 | N.A. | 0 |
| NLRP6        | 0,027528056 | -0,039078951 | 0 | N.A. | 0 |
| RP11-420A6.  | 0,027501718 | 0,134312687  | 0 | N.A. | 0 |
| MSH5         | 0,02749669  | 0,118258524  | 0 | N.A. | 0 |
| AP001062.7   | 0,027492153 | 0,117498368  | 0 | N.A. | 0 |
| ZDBF2        | 0,027489236 | 0,168522863  | 0 | N.A. | 0 |
| RP11-440D17  | 0,027480033 |              | 0 | N.A. | 0 |
| RRM2B        | 0,027478002 | -0,259837563 | 0 | N.A. | 0 |
| DTHD1        | 0,027472517 |              | 0 | N.A. | 0 |
| ADCY2        | 0,027457214 |              | 0 | N.A. | 0 |
| FAM179A      | 0,027432729 |              | 0 | N.A. | 0 |
| SPINK9       | 0,027412393 |              | 0 | N.A. | 0 |
| RP11-689P11  | 0,027355897 | 0,06288085   | 0 | N.A. | 0 |
| C4orf47      | 0,027348967 | 0,086023954  | 0 | N.A. | 0 |
| RP11-61A14.  | 0,027334925 | -0,188269342 | 0 | N.A. | 0 |
| BLACAT1      | 0,027306206 | 0,079103064  | 0 | N.A. | 0 |
| CTD-2666L21  | 0,027305407 |              | 0 | N.A. | 0 |
| LINC00862    | 0,027304727 | 0,212849304  | 0 | N.A. | 0 |

|              |             |              |   |      |   |
|--------------|-------------|--------------|---|------|---|
| TCHP         | 0,027293836 | -0,24407448  | 0 | N.A. | 0 |
| LINC00926    | 0,027292173 | 0,120111742  | 0 | N.A. | 0 |
| RP11-489E7.  | 0,027235054 | -0,049930244 | 0 | N.A. | 0 |
| LIN54        | 0,027230887 | -0,120905703 | 0 | N.A. | 0 |
| RP11-105N14  | 0,027218323 | 0,101183741  | 0 | N.A. | 0 |
| PLIN4        | 0,027204665 |              | 0 | N.A. | 0 |
| RP11-38107.  | 0,027200365 |              | 0 | N.A. | 0 |
| HIST1H2BE    | 0,027160169 | -0,249600668 | 0 | N.A. | 0 |
| IL18BP       | 0,027139534 | -0,071573965 | 0 | N.A. | 0 |
| RP11-805I24  | 0,027137241 | 0,277984902  | 0 | N.A. | 0 |
| FIZ1         | 0,027132091 | 0,075270207  | 0 | N.A. | 0 |
| PCDH9        | 0,027096004 | -0,013181315 | 0 | N.A. | 0 |
| HEY1         | 0,027031612 | -0,002473551 | 0 | N.A. | 0 |
| CCDC80       | 0,026998956 | 0,216957704  | 0 | N.A. | 0 |
| PHF3         | 0,02699825  | 0,050483435  | 0 | N.A. | 0 |
| DISC1        | 0,026989803 | -0,119384794 | 0 | N.A. | 0 |
| ZNF844       | 0,026981224 | 0,085574686  | 0 | N.A. | 0 |
| IGHG2        | 0,026884887 | -0,011212937 | 0 | N.A. | 0 |
| AP000253.1   | 0,026884736 | 0,050323856  | 0 | N.A. | 0 |
| ERICH4       | 0,02686825  |              | 0 | N.A. | 0 |
| VPS45        | 0,026837292 | 0,342479107  | 0 | N.A. | 0 |
| AC005480.1   | 0,026817677 | -0,222691337 | 0 | N.A. | 0 |
| SAP30L       | 0,026812826 | 0,100787797  | 0 | N.A. | 0 |
| GLUL         | 0,026752403 | -0,056153451 | 0 | N.A. | 0 |
| SHANK2       | 0,026744726 | 0,145563324  | 0 | N.A. | 0 |
| GORAB        | 0,026743347 | -0,076244757 | 0 | N.A. | 0 |
| DLG1-AS1     | 0,026733763 | -0,209481109 | 0 | N.A. | 0 |
| CTC-250I14.6 | 0,026732091 | 0,180776676  | 0 | N.A. | 0 |
| B3GNT9       | 0,026730512 | 0,12672677   | 0 | N.A. | 0 |
| AC092301.3   | 0,026668963 | 0,128076149  | 0 | N.A. | 0 |
| RP11-449P15  | 0,026667132 | 0,006599937  | 0 | N.A. | 0 |
| RP11-686G8.  | 0,026640156 | 0,324373981  | 0 | N.A. | 0 |
| HOXC9        | 0,026640033 | 0,118433903  | 0 | N.A. | 0 |

|             |             |              |   |      |   |
|-------------|-------------|--------------|---|------|---|
| TUSC3       | 0,026521778 | -0,04531655  | 0 | N.A. | 0 |
| RNF148      | 0,026500324 | 0,16648459   | 0 | N.A. | 0 |
| KIAA1467    | 0,026409537 | 0,038402074  | 0 | N.A. | 0 |
| AC012368.1  | 0,026405603 |              | 0 | N.A. | 0 |
| RP11-2C24.7 | 0,026385979 | -0,085544105 | 0 | N.A. | 0 |
| RP11-967K21 | 0,026299331 | 0,32272411   | 0 | N.A. | 0 |
| UBR1        | 0,026257328 | 0,132734576  | 0 | N.A. | 0 |
| STYXL1      | 0,026250572 | 0,027970871  | 0 | N.A. | 0 |
| BZW1        | 0,026234066 | -0,023847269 | 0 | N.A. | 0 |
| CABP1       | 0,026187633 | -0,324763779 | 0 | N.A. | 0 |
| RBBP6       | 0,026179242 | 0,260155601  | 0 | N.A. | 0 |
| NPIP811     | 0,026163188 | 0,195192797  | 0 | N.A. | 0 |
| RP11-22N19. | 0,026158242 | -0,001210997 | 0 | N.A. | 0 |
| DCST2       | 0,026109956 | 0,028831242  | 0 | N.A. | 0 |
| ZNF66       | 0,026078159 | 0,330609263  | 0 | N.A. | 0 |
| LDOC1L      | 0,026069661 | -0,326576895 | 0 | N.A. | 0 |
| CPA3        | 0,026061464 | 0,015286399  | 0 | N.A. | 0 |
| PAQR6       | 0,02601806  | 0,190125066  | 0 | N.A. | 0 |
| C16orf70    | 0,026010173 | 0,085812139  | 0 | N.A. | 0 |
| RP11-793H13 | 0,025987348 | -0,197819517 | 0 | N.A. | 0 |
| RASSF9      | 0,025967682 | -0,061474091 | 0 | N.A. | 0 |
| AXDND1      | 0,025950139 | -0,061583315 | 0 | N.A. | 0 |
| HOXB3       | 0,025924754 | 0,228291741  | 0 | N.A. | 0 |
| FOXQ1       | 0,025913282 | 0,04852395   | 0 | N.A. | 0 |
| HINFP       | 0,025898628 | 0,138758502  | 0 | N.A. | 0 |
| NHLH1       | 0,025842951 | 0,102555456  | 0 | N.A. | 0 |
| PLA2G12B    | 0,025827417 | -0,109873238 | 0 | N.A. | 0 |
| CD300LB     | 0,025825026 |              | 0 | N.A. | 0 |
| RSPO2       | 0,025682659 |              | 0 | N.A. | 0 |
| GS1-114I9.1 | 0,025605738 |              | 0 | N.A. | 0 |
| MLXIPL      | 0,025604609 | 0,225450208  | 0 | N.A. | 0 |
| RP1-267L14. | 0,025591779 | 0,173855662  | 0 | N.A. | 0 |
| RP11-734K2. | 0,025508548 | -0,116369949 | 0 | N.A. | 0 |

|             |             |              |   |      |   |
|-------------|-------------|--------------|---|------|---|
| FBXL8       | 0,02548894  | 0,291067639  | 0 | N.A. | 0 |
| AP001437.1  | 0,025445222 | 0,024348573  | 0 | N.A. | 0 |
| SOX30       | 0,025423111 | 0,052604178  | 0 | N.A. | 0 |
| RP11-268G13 | 0,02538864  | 0,08058074   | 0 | N.A. | 0 |
| FMO4        | 0,025371253 | 0,069207256  | 0 | N.A. | 0 |
| HERC1       | 0,025363802 | 0,014949416  | 0 | N.A. | 0 |
| LINC01503   | 0,025345765 | -0,046721046 | 0 | N.A. | 0 |
| SIGLEC1     | 0,025320619 | -0,123886016 | 0 | N.A. | 0 |
| IFI27L1     | 0,025320382 | 0,114686004  | 0 | N.A. | 0 |
| SNX3        | 0,025311768 | -0,149351484 | 0 | N.A. | 0 |
| PAPOLA      | 0,025296449 | 0,090718518  | 0 | N.A. | 0 |
| FAM78A      | 0,025295564 |              | 0 | N.A. | 0 |
| PDE6A       | 0,025281057 | 0,092809015  | 0 | N.A. | 0 |
| LINC00571   | 0,025258437 | 0,354816296  | 0 | N.A. | 0 |
| TRIM54      | 0,02525769  | -0,222529797 | 0 | N.A. | 0 |
| PKP1        | 0,025231937 | 0,305685037  | 0 | N.A. | 0 |
| P4HA3       | 0,025216966 | 0,067777467  | 0 | N.A. | 0 |
| TMEM254     | 0,025202586 | -0,263625611 | 0 | N.A. | 0 |
| MSI2        | 0,025185315 | 0,211356854  | 0 | N.A. | 0 |
| CTD-3001H1  | 0,02514629  | 0,133348763  | 0 | N.A. | 0 |
| AIM1        | 0,025116434 | 0,087260994  | 0 | N.A. | 0 |
| TLR5        | 0,025097177 | -0,005995137 | 0 | N.A. | 0 |
| CTD-2506P8  | 0,02509391  | -0,059414992 | 0 | N.A. | 0 |
| LHX1        | 0,025073064 | 0,028339947  | 0 | N.A. | 0 |
| RP11-46H11  | 0,025070999 | -0,053834883 | 0 | N.A. | 0 |
| SMAP2       | 0,02506997  | -0,032260756 | 0 | N.A. | 0 |
| NOD1        | 0,02506821  | -0,100746908 | 0 | N.A. | 0 |
| STX16-NPEPL | 0,025057165 | -0,01079708  | 0 | N.A. | 0 |
| ATF5        | 0,025028912 | -0,022229334 | 0 | N.A. | 0 |
| PRR22       | 0,024972965 | 0,162745928  | 0 | N.A. | 0 |
| USP3        | 0,024950273 | 0,210153031  | 0 | N.A. | 0 |
| ZBTB21      | 0,024944385 | 0,131508488  | 0 | N.A. | 0 |
| AC005786.5  | 0,024868589 |              | 0 | N.A. | 0 |

|             |             |              |   |      |   |
|-------------|-------------|--------------|---|------|---|
| ATXN7L2     | 0,024847046 | 0,075161518  | 0 | N.A. | 0 |
| IL18RAP     | 0,024841861 |              | 0 | N.A. | 0 |
| TLL2        | 0,024813544 | -0,135481786 | 0 | N.A. | 0 |
| RP5-1139B12 | 0,024808418 |              | 0 | N.A. | 0 |
| STAG2       | 0,024750956 | 0,250377057  | 0 | N.A. | 0 |
| ZMYND12     | 0,024677452 | 0,072130825  | 0 | N.A. | 0 |
| TMED10      | 0,024664005 | 0,387031995  | 0 | N.A. | 0 |
| LINC01460   | 0,024647138 |              | 0 | N.A. | 0 |
| RP11-111F5. | 0,024633763 | 0,011097543  | 0 | N.A. | 0 |
| ZNF304      | 0,024574754 | 0,199421163  | 0 | N.A. | 0 |
| CHD3        | 0,024517355 | -0,07021015  | 0 | N.A. | 0 |
| ZFP62       | 0,024502299 | -0,330368321 | 0 | N.A. | 0 |
| EDNRB       | 0,024453906 | 0,197336201  | 0 | N.A. | 0 |
| ACTR10      | 0,024443734 | -0,050090263 | 0 | N.A. | 0 |
| CH507-513H  | 0,024413049 |              | 0 | N.A. | 0 |
| INE2        | 0,024405267 | 0,249031159  | 0 | N.A. | 0 |
| RP11-655M1  | 0,024382084 | -0,088489805 | 0 | N.A. | 0 |
| GRAMD2      | 0,02436071  | 0,132118527  | 0 | N.A. | 0 |
| IZUMO1      | 0,024357122 | -0,113980706 | 0 | N.A. | 0 |
| DCP2        | 0,024325144 | 0,299854657  | 0 | N.A. | 0 |
| CEP120      | 0,024309887 | 0,213971632  | 0 | N.A. | 0 |
| RP11-55K13. | 0,024303364 | 0,089717599  | 0 | N.A. | 0 |
| ZBTB48      | 0,024302126 | 0,320567545  | 0 | N.A. | 0 |
| GHRLOS      | 0,024297099 | 0,103643378  | 0 | N.A. | 0 |
| DICER1-AS1  | 0,024282396 | 0,210915126  | 0 | N.A. | 0 |
| RANBP6      | 0,0242736   | 0,033936972  | 0 | N.A. | 0 |
| ARL17B      | 0,024250862 | -0,060805432 | 0 | N.A. | 0 |
| MAMSTR      | 0,024236016 | -0,096589363 | 0 | N.A. | 0 |
| PDIA2       | 0,024232982 | -0,048807036 | 0 | N.A. | 0 |
| AC145110.1  | 0,024226158 |              | 0 | N.A. | 0 |
| ADPRHL1     | 0,024211028 | -0,315166114 | 0 | N.A. | 0 |
| RP11-345M2  | 0,024209302 | 0,245443889  | 0 | N.A. | 0 |
| RP1-249I4.2 | 0,024203146 |              | 0 | N.A. | 0 |



|             |             |              |   |      |   |
|-------------|-------------|--------------|---|------|---|
| LLGL1       | 0,024199152 | 0,399485192  | 0 | N.A. | 0 |
| FAM212B     | 0,024118204 | 0,164138676  | 0 | N.A. | 0 |
| RP11-21M24  | 0,02410303  | 0,056194818  | 0 | N.A. | 0 |
| RP11-884K10 | 0,024088099 |              | 0 | N.A. | 0 |
| RP11-53O19  | 0,024033022 | 0,276669062  | 0 | N.A. | 0 |
| RP11-309L24 | 0,023998369 | 0,012098758  | 0 | N.A. | 0 |
| LRRC28      | 0,023943429 | -0,119181833 | 0 | N.A. | 0 |
| RP5-1056H1  | 0,023878364 | -0,008175608 | 0 | N.A. | 0 |
| FYTTD1      | 0,023863834 | -0,094382663 | 0 | N.A. | 0 |
| AC074183.4  | 0,023847287 | -0,151547463 | 0 | N.A. | 0 |
| CNTD2       | 0,023797887 | 0,028845418  | 0 | N.A. | 0 |
| ABCG2       | 0,023731726 | 0,263408527  | 0 | N.A. | 0 |
| RP11-458D21 | 0,023707038 | 0,299253252  | 0 | N.A. | 0 |
| POLR2J2     | 0,023646798 | 0,027182653  | 0 | N.A. | 0 |
| RP11-296O14 | 0,023633386 |              | 0 | N.A. | 0 |
| SDS         | 0,02359128  | -0,164500728 | 0 | N.A. | 0 |
| RP11-734K21 | 0,023566718 |              | 0 | N.A. | 0 |
| KLHL5       | 0,023564531 | -0,109498848 | 0 | N.A. | 0 |
| RP11-1057B6 | 0,023561814 |              | 0 | N.A. | 0 |
| AC004009.3  | 0,023535111 |              | 0 | N.A. | 0 |
| FUT8        | 0,023526641 | 0,100808982  | 0 | N.A. | 0 |
| RP4-789D17  | 0,023524735 | 0,058329981  | 0 | N.A. | 0 |
| CCR7        | 0,023503337 | -0,297317956 | 0 | N.A. | 0 |
| FAM210B     | 0,023472007 | 0,297613347  | 0 | N.A. | 0 |
| RP4-616B8.4 | 0,023468832 | -0,018644341 | 0 | N.A. | 0 |
| SPARCL1     | 0,023426301 | 0,134782418  | 0 | N.A. | 0 |
| PACSIN3     | 0,023333304 | 0,189156556  | 0 | N.A. | 0 |
| RP11-22P6.2 | 0,02333197  | 0,138511921  | 0 | N.A. | 0 |
| CTD-2527I21 | 0,023329776 |              | 0 | N.A. | 0 |
| AC010096.1  | 0,023306896 |              | 0 | N.A. | 0 |
| PCDHB10     | 0,023281551 | 0,020816288  | 0 | N.A. | 0 |
| RP4-669H2.1 | 0,023276762 | 0,181011341  | 0 | N.A. | 0 |
| RP11-789C1  | 0,023264939 | -0,263532863 | 0 | N.A. | 0 |

|              |             |              |   |      |   |
|--------------|-------------|--------------|---|------|---|
| MZB1         | 0,023256441 | -0,190954411 | 0 | N.A. | 0 |
| WNT4         | 0,023229901 | -0,078086419 | 0 | N.A. | 0 |
| USP26        | 0,023193043 |              | 0 | N.A. | 0 |
| LIPE-AS1     | 0,023180778 | -0,062078352 | 0 | N.A. | 0 |
| FRMD6        | 0,023146377 | 0,143794203  | 0 | N.A. | 0 |
| ANKMY1       | 0,023137686 | 0,098491062  | 0 | N.A. | 0 |
| TBX6         | 0,023096535 | 0,207455973  | 0 | N.A. | 0 |
| PAPLN        | 0,023083348 |              | 0 | N.A. | 0 |
| RP11-767C1.  | 0,023077797 | 0,126027941  | 0 | N.A. | 0 |
| RP5-1050D4.  | 0,023064127 | -0,043732013 | 0 | N.A. | 0 |
| DBN1         | 0,023018273 | 0,433082133  | 0 | N.A. | 0 |
| PCDHB7       | 0,022977499 | 0,140322187  | 0 | N.A. | 0 |
| RP1-28H20.3  | 0,022975429 | 0,137231506  | 0 | N.A. | 0 |
| BPNT1        | 0,022969042 | -0,014284758 | 0 | N.A. | 0 |
| SURF1        | 0,022953772 | 0,135375206  | 0 | N.A. | 0 |
| MFAP3        | 0,022904099 | 0,066269511  | 0 | N.A. | 0 |
| HOTTIP       | 0,022893887 | 0,12631727   | 0 | N.A. | 0 |
| CBLN4        | 0,022880589 |              | 0 | N.A. | 0 |
| RP1-206D15.  | 0,022847377 | 0,008577696  | 0 | N.A. | 0 |
| CAPN10       | 0,022835264 | 0,345362771  | 0 | N.A. | 0 |
| RASGEF1A     | 0,02281017  | 0,138231596  | 0 | N.A. | 0 |
| IRF2BP2      | 0,022731426 | 0,355407216  | 0 | N.A. | 0 |
| CTD-2034I4.2 | 0,022714248 |              | 0 | N.A. | 0 |
| SCNN1G       | 0,022713731 | 0,301828534  | 0 | N.A. | 0 |
| EXT2         | 0,022705835 | 0,426075701  | 0 | N.A. | 0 |
| RP11-21B23.  | 0,022695806 | 0,398737047  | 0 | N.A. | 0 |
| SEZ6         | 0,02268774  |              | 0 | N.A. | 0 |
| TTC9C        | 0,022665924 | -0,096607509 | 0 | N.A. | 0 |
| CCDC81       | 0,022644283 | 0,053915578  | 0 | N.A. | 0 |
| RP11-206L10  | 0,022611314 | -0,026579847 | 0 | N.A. | 0 |
| RP11-576N1   | 0,022594436 |              | 0 | N.A. | 0 |
| RP11-315O6.  | 0,022591827 | -0,288471993 | 0 | N.A. | 0 |
| GPR25        | 0,022570145 |              | 0 | N.A. | 0 |

|              |             |              |   |      |   |
|--------------|-------------|--------------|---|------|---|
| AC068831.10  | 0,022548068 | -0,009560142 | 0 | N.A. | 0 |
| DLGAP3       | 0,02251011  | 0,289747232  | 0 | N.A. | 0 |
| TNFRSF17     | 0,022483725 |              | 0 | N.A. | 0 |
| C10orf111    | 0,022460708 | 0,306805328  | 0 | N.A. | 0 |
| DYNC1I2      | 0,022393594 | 0,535466344  | 0 | N.A. | 0 |
| MCF2L        | 0,022387835 | -0,007908949 | 0 | N.A. | 0 |
| CELF5        | 0,022369853 | -0,135844488 | 0 | N.A. | 0 |
| CTD-2201I18  | 0,022359758 | -0,066647338 | 0 | N.A. | 0 |
| HR           | 0,022279582 | 0,109615047  | 0 | N.A. | 0 |
| RP11-527J8.1 | 0,022243568 | 0,333407989  | 0 | N.A. | 0 |
| RAB11FIP2    | 0,022229378 | -0,032269321 | 0 | N.A. | 0 |
| CCDC132      | 0,022229116 | 0,009363971  | 0 | N.A. | 0 |
| PCDHB9       | 0,02221311  | 0,26628246   | 0 | N.A. | 0 |
| CROCC        | 0,022209201 | 0,098867907  | 0 | N.A. | 0 |
| LRRC37B      | 0,022191268 | 2,1722E-05   | 0 | N.A. | 0 |
| ARMC8        | 0,02216878  | 0,08973756   | 0 | N.A. | 0 |
| ABCG8        | 0,022126011 | 0,116464762  | 0 | N.A. | 0 |
| A1BG-AS1     | 0,022124171 | 0,016859792  | 0 | N.A. | 0 |
| RP11-266J6.2 | 0,022123347 | 0,363819122  | 0 | N.A. | 0 |
| PPP1R14A     | 0,022103627 | -0,174071687 | 0 | N.A. | 0 |
| SELM         | 0,022099079 | 0,092591378  | 0 | N.A. | 0 |
| ID1          | 0,022083607 | 0,365187487  | 0 | N.A. | 0 |
| DNAAF3       | 0,022083217 | 0,02343854   | 0 | N.A. | 0 |
| ASCL5        | 0,022056511 | 0,08550543   | 0 | N.A. | 0 |
| PCNXL2       | 0,022024389 | -0,163892682 | 0 | N.A. | 0 |
| OAZ3         | 0,02201324  | 0,361421909  | 0 | N.A. | 0 |
| WNT6         | 0,021951567 | -0,101294844 | 0 | N.A. | 0 |
| SLX1A        | 0,021936254 | -0,010969473 | 0 | N.A. | 0 |
| DPH6-AS1     | 0,021900992 | -0,076169819 | 0 | N.A. | 0 |
| HACE1        | 0,021819313 | 0,011093338  | 0 | N.A. | 0 |
| KRTAP5-5     | 0,021792315 | 0,172998656  | 0 | N.A. | 0 |
| ZNF718       | 0,021787847 | 0,109322445  | 0 | N.A. | 0 |
| CCDC148      | 0,02178318  | 0,041437294  | 0 | N.A. | 0 |

|              |             |              |   |      |   |
|--------------|-------------|--------------|---|------|---|
| ZBTB39       | 0,021772884 | 0,003497712  | 0 | N.A. | 0 |
| LDHA         | 0,021693637 | 0,087391507  | 0 | N.A. | 0 |
| APBB3        | 0,021681185 | 0,079928488  | 0 | N.A. | 0 |
| BRPF1        | 0,021667011 | 0,058411344  | 0 | N.A. | 0 |
| GABBR1       | 0,021659566 | -0,051145806 | 0 | N.A. | 0 |
| ANKRD40      | 0,02165655  | 0,07880301   | 0 | N.A. | 0 |
| ZNF205       | 0,021642858 | 0,155856367  | 0 | N.A. | 0 |
| EPB41L4A-AS1 | 0,021633877 | -0,030628015 | 0 | N.A. | 0 |
| TRAPPC9      | 0,021554013 | 0,057248374  | 0 | N.A. | 0 |
| CD226        | 0,02152544  | 0,043246612  | 0 | N.A. | 0 |
| SMARCA1      | 0,021514906 | -0,067232661 | 0 | N.A. | 0 |
| CTC-260F20.1 | 0,021511425 | 0,145281785  | 0 | N.A. | 0 |
| RP11-182J23  | 0,021487213 | 0,307363391  | 0 | N.A. | 0 |
| ZNF703       | 0,021427276 | 0,254267299  | 0 | N.A. | 0 |
| NHLH2        | 0,021386979 | -0,014083432 | 0 | N.A. | 0 |
| ANKRD42      | 0,021385564 | 0,088059869  | 0 | N.A. | 0 |
| DLGAP1-AS1   | 0,021362764 | -0,035606163 | 0 | N.A. | 0 |
| SIDT1-AS1    | 0,021360537 | 0,146960934  | 0 | N.A. | 0 |
| GLI4         | 0,021358916 | -0,013653594 | 0 | N.A. | 0 |
| LMO4         | 0,021350912 | 0,253160004  | 0 | N.A. | 0 |
| FCGR2A       | 0,021318658 | -0,292500016 | 0 | N.A. | 0 |
| NADK         | 0,021305907 | 0,32091539   | 0 | N.A. | 0 |
| AFP          | 0,021295323 | 0,022881801  | 0 | N.A. | 0 |
| EDNRA        | 0,02126684  | -0,029020141 | 0 | N.A. | 0 |
| IGLC3        | 0,021261093 | -0,263295013 | 0 | N.A. | 0 |
| RUSC1-AS1    | 0,021223908 | 0,188563311  | 0 | N.A. | 0 |
| RP11-676J12  | 0,021143993 |              | 0 | N.A. | 0 |
| CEP170       | 0,021095327 | 0,248497034  | 0 | N.A. | 0 |
| C5orf52      | 0,021072378 | -0,216749821 | 0 | N.A. | 0 |
| NCR3         | 0,021048139 | -0,068626731 | 0 | N.A. | 0 |
| RP1-199J3.7  | 0,021032366 | 0,180181168  | 0 | N.A. | 0 |
| RP11-1105G2  | 0,021023988 | 0,031304688  | 0 | N.A. | 0 |
| GNG12-AS1    | 0,020976905 | 0,097322008  | 0 | N.A. | 0 |

|             |             |              |   |      |   |
|-------------|-------------|--------------|---|------|---|
| HS2ST1      | 0,020930241 | 0,35263999   | 0 | N.A. | 0 |
| RP11-255M2  | 0,020925176 | 0,04951962   | 0 | N.A. | 0 |
| TMEM41A     | 0,02092473  | 0,317539865  | 0 | N.A. | 0 |
| RP11-792A8. | 0,02088856  | 0,148897646  | 0 | N.A. | 0 |
| CCND2-AS1   | 0,020882527 | 0,043216492  | 0 | N.A. | 0 |
| RP11-8818.2 | 0,020829637 | -0,177079386 | 0 | N.A. | 0 |
| TDRD6       | 0,020808824 | 0,09696501   | 0 | N.A. | 0 |
| FOXF1       | 0,020747649 | -0,057810304 | 0 | N.A. | 0 |
| CTC-425F1.4 | 0,020739638 | 0,101167804  | 0 | N.A. | 0 |
| FAM53A      | 0,020734643 | 0,016185478  | 0 | N.A. | 0 |
| SLC7A2      | 0,020698272 | 0,203486814  | 0 | N.A. | 0 |
| GOLGA8N     | 0,020654627 | -0,013438024 | 0 | N.A. | 0 |
| ZHX1        | 0,020621575 | 0,27843924   | 0 | N.A. | 0 |
| HIAT1       | 0,020611243 | 0,075909952  | 0 | N.A. | 0 |
| IRX5        | 0,020587531 | -0,086800757 | 0 | N.A. | 0 |
| TBX1        | 0,020586485 | -0,130979215 | 0 | N.A. | 0 |
| ZNF597      | 0,020584514 | 0,113279992  | 0 | N.A. | 0 |
| RP11-359K18 | 0,020574955 | 0,258117171  | 0 | N.A. | 0 |
| CDC42EP3    | 0,020528386 | -0,126155092 | 0 | N.A. | 0 |
| KB-1410C5.5 | 0,020481195 |              | 0 | N.A. | 0 |
| ZNF660      | 0,020457922 |              | 0 | N.A. | 0 |
| SHD         | 0,020445808 | 0,224296311  | 0 | N.A. | 0 |
| MAP1B       | 0,020406632 | 0,391411038  | 0 | N.A. | 0 |
| SPDYE3      | 0,020383473 | -0,108326879 | 0 | N.A. | 0 |
| PSMB8-AS1   | 0,020373695 | -0,204914825 | 0 | N.A. | 0 |
| VWCE        | 0,020346848 | 0,051018109  | 0 | N.A. | 0 |
| RP11-514D23 | 0,020346027 |              | 0 | N.A. | 0 |
| RP11-448A19 | 0,020343149 | 0,174098535  | 0 | N.A. | 0 |
| RNASE6      | 0,020341993 | -0,45622833  | 0 | N.A. | 0 |
| SELE        | 0,020328942 |              | 0 | N.A. | 0 |
| CFI         | 0,020328612 | -0,294400065 | 0 | N.A. | 0 |
| CAPZA2      | 0,020275895 | -0,201896477 | 0 | N.A. | 0 |
| TMEM184C    | 0,020252266 | -0,076897422 | 0 | N.A. | 0 |

|             |             |              |   |      |   |
|-------------|-------------|--------------|---|------|---|
| RP11-526A4. | 0,020220266 | 0,016801615  | 0 | N.A. | 0 |
| ARMCX2      | 0,0202154   | 0,174912714  | 0 | N.A. | 0 |
| SECISBP2    | 0,020204314 | 0,26605116   | 0 | N.A. | 0 |
| RP11-188P17 | 0,020198174 | -0,0276325   | 0 | N.A. | 0 |
| C1QTNF1     | 0,020184202 | -0,143760942 | 0 | N.A. | 0 |
| RP3-402G11. | 0,020166191 |              | 0 | N.A. | 0 |
| LCP1        | 0,020158597 | -0,218010676 | 0 | N.A. | 0 |
| DCUN1D4     | 0,020114655 | -0,263838795 | 0 | N.A. | 0 |
| MGC16275    | 0,020113502 |              | 0 | N.A. | 0 |
| RP13-270P17 | 0,020085438 | 0,075615488  | 0 | N.A. | 0 |
| SEPT12      | 0,020019455 |              | 0 | N.A. | 0 |
| RP11-388C12 | 0,020014641 | -0,170164771 | 0 | N.A. | 0 |
| SPDEF       | 0,020014265 | 0,119362654  | 0 | N.A. | 0 |
| RP11-407N17 | 0,020000103 | 0,26841577   | 0 | N.A. | 0 |
| ZNF619      | 0,019992842 | 0,160038964  | 0 | N.A. | 0 |
| CHRD        | 0,019988507 | -0,233312825 | 0 | N.A. | 0 |
| KLKB1       | 0,019957573 | -0,058210917 | 0 | N.A. | 0 |
| CTD-2283N1  | 0,019942055 | -0,13034914  | 0 | N.A. | 0 |
| AC073257.2  | 0,019894819 |              | 0 | N.A. | 0 |
| RP11-27M24  | 0,019882366 | -0,073668986 | 0 | N.A. | 0 |
| CTD-2015G9  | 0,019852423 |              | 0 | N.A. | 0 |
| LSS         | 0,019811461 | 0,369780551  | 0 | N.A. | 0 |
| TRIM39      | 0,019766984 | -0,25472267  | 0 | N.A. | 0 |
| FBN1        | 0,019758237 | -0,065190364 | 0 | N.A. | 0 |
| PCDH11Y     | 0,019711706 | 0,000597634  | 0 | N.A. | 0 |
| LINC00240   | 0,019688535 | 0,022219601  | 0 | N.A. | 0 |
| MBLAC1      | 0,019658237 | -0,046040182 | 0 | N.A. | 0 |
| ZNF787      | 0,019657692 | 0,139167741  | 0 | N.A. | 0 |
| RP11-134K13 | 0,01965008  |              | 0 | N.A. | 0 |
| ZYG11B      | 0,019635115 | 0,276352235  | 0 | N.A. | 0 |
| PCOLCE2     | 0,019609363 | 0,236737887  | 0 | N.A. | 0 |
| ADSSL1      | 0,019595298 | -0,080977787 | 0 | N.A. | 0 |
| KCNE2       | 0,019559681 |              | 0 | N.A. | 0 |

|             |             |              |   |      |   |
|-------------|-------------|--------------|---|------|---|
| IGHV3-73    | 0,019535924 |              | 0 | N.A. | 0 |
| CTC-329D1.2 | 0,019458307 | 0,121945616  | 0 | N.A. | 0 |
| NFIX        | 0,019445259 | 0,160667427  | 0 | N.A. | 0 |
| ENTPD6      | 0,019438881 | 0,24179159   | 0 | N.A. | 0 |
| CHST12      | 0,019329211 | -0,067934106 | 0 | N.A. | 0 |
| NLRP3       | 0,01930939  | -0,193252775 | 0 | N.A. | 0 |
| CNNM2       | 0,019307372 | 0,113703878  | 0 | N.A. | 0 |
| ZNF837      | 0,0192572   | 0,041651646  | 0 | N.A. | 0 |
| MOB1A       | 0,019250373 | -0,156713137 | 0 | N.A. | 0 |
| PDGFC       | 0,019237299 | -0,171787657 | 0 | N.A. | 0 |
| FOXG1-AS1   | 0,019237282 |              | 0 | N.A. | 0 |
| SPG7        | 0,019235258 | 0,453399053  | 0 | N.A. | 0 |
| FN1         | 0,019211367 | -0,232173241 | 0 | N.A. | 0 |
| PPP4R4      | 0,019207014 |              | 0 | N.A. | 0 |
| LINGO3      | 0,019178518 |              | 0 | N.A. | 0 |
| PVRL3-AS1   | 0,019172957 | -0,09730381  | 0 | N.A. | 0 |
| ZNF774      | 0,019162824 | 0,041515945  | 0 | N.A. | 0 |
| RP11-407N1  | 0,019155356 | 0,233649812  | 0 | N.A. | 0 |
| GIGYF2      | 0,019150533 | 0,065500072  | 0 | N.A. | 0 |
| FBXO38      | 0,019120168 | 0,196698942  | 0 | N.A. | 0 |
| UBASH3A     | 0,019109794 | -0,337384868 | 0 | N.A. | 0 |
| ALDH1A2     | 0,019088104 | -0,145935694 | 0 | N.A. | 0 |
| TTC16       | 0,019058863 | 0,075359264  | 0 | N.A. | 0 |
| FAM122A     | 0,019043724 | -0,186713595 | 0 | N.A. | 0 |
| SLC16A13    | 0,019042311 | 0,180446205  | 0 | N.A. | 0 |
| CTD-2135D7  | 0,018949981 | -0,090321491 | 0 | N.A. | 0 |
| SIX3        | 0,01893859  | -0,051117089 | 0 | N.A. | 0 |
| CPT1C       | 0,018928853 | -0,175489915 | 0 | N.A. | 0 |
| BASP1       | 0,018911937 | -0,027610065 | 0 | N.A. | 0 |
| RP5-1159O4  | 0,018879396 | 0,094905337  | 0 | N.A. | 0 |
| RP11-890B15 | 0,018861741 | 0,118317783  | 0 | N.A. | 0 |
| JADE3       | 0,018806231 | -0,089767606 | 0 | N.A. | 0 |
| TBX20       | 0,018794121 | 0,135434664  | 0 | N.A. | 0 |

|             |             |              |   |      |   |
|-------------|-------------|--------------|---|------|---|
| GXYLT1      | 0,018733874 | 0,093415348  | 0 | N.A. | 0 |
| NLRP1       | 0,018732406 | -0,023471512 | 0 | N.A. | 0 |
| CBS         | 0,018727503 |              | 0 | N.A. | 0 |
| COTL1       | 0,018719165 | -0,413192902 | 0 | N.A. | 0 |
| SLC29A4     | 0,018714807 | -0,017779896 | 0 | N.A. | 0 |
| HOXB2       | 0,018630629 | 0,138138447  | 0 | N.A. | 0 |
| ST5         | 0,018615554 | 0,214006616  | 0 | N.A. | 0 |
| XXbac-BPGB1 | 0,018614635 |              | 0 | N.A. | 0 |
| RP1-43E13.2 | 0,018598432 | 0,064127639  | 0 | N.A. | 0 |
| DNAH7       | 0,018596074 | 0,016586672  | 0 | N.A. | 0 |
| PPP1R27     | 0,018582215 | -0,030309957 | 0 | N.A. | 0 |
| HEXA        | 0,018556738 | -0,061008486 | 0 | N.A. | 0 |
| PRDM12      | 0,018546331 | 0,03158512   | 0 | N.A. | 0 |
| RP11-321N4  | 0,018541732 | 0,000965671  | 0 | N.A. | 0 |
| KLHL11      | 0,018486501 | 0,218176424  | 0 | N.A. | 0 |
| DDX39B      | 0,018445696 | 0,227782719  | 0 | N.A. | 0 |
| PLA2G3      | 0,018445325 | 0,0964197    | 0 | N.A. | 0 |
| CDH11       | 0,018433153 | 0,120286511  | 0 | N.A. | 0 |
| RP11-524H19 | 0,018406735 | 0,301985414  | 0 | N.A. | 0 |
| RP11-707M3  | 0,018396445 |              | 0 | N.A. | 0 |
| NHSL1       | 0,01838286  | 0,115739747  | 0 | N.A. | 0 |
| ARSJ        | 0,018356718 | 0,105661516  | 0 | N.A. | 0 |
| GATSL3      | 0,018269665 | 0,005455703  | 0 | N.A. | 0 |
| ZNF777      | 0,018236021 | 0,028864563  | 0 | N.A. | 0 |
| FBXL12      | 0,018230009 | 0,241371332  | 0 | N.A. | 0 |
| CTXN2       | 0,01822207  |              | 0 | N.A. | 0 |
| RP5-1061H20 | 0,018199973 |              | 0 | N.A. | 0 |
| CTD-2026K11 | 0,018159127 | -0,087502804 | 0 | N.A. | 0 |
| PRKAR1A     | 0,018126948 | 0,006660487  | 0 | N.A. | 0 |
| ZNF347      | 0,018126052 | -0,184269838 | 0 | N.A. | 0 |
| AC007383.3  | 0,018123026 | -0,016743779 | 0 | N.A. | 0 |
| HEATR4      | 0,018111434 | -0,02753249  | 0 | N.A. | 0 |
| RP11-382J12 | 0,018098142 | -0,060701065 | 0 | N.A. | 0 |



|             |             |              |   |      |   |
|-------------|-------------|--------------|---|------|---|
| TCF25       | 0,018083622 | -0,137066749 | 0 | N.A. | 0 |
| MAB21L3     | 0,018039576 | 0,241332414  | 0 | N.A. | 0 |
| ABCA8       | 0,018012515 |              | 0 | N.A. | 0 |
| LINC01524   | 0,01799716  |              | 0 | N.A. | 0 |
| KRT78       | 0,017968558 |              | 0 | N.A. | 0 |
| ZNF35       | 0,017932821 | -0,356215324 | 0 | N.A. | 0 |
| CASP9       | 0,017923033 | 0,079501327  | 0 | N.A. | 0 |
| XG          | 0,017914041 |              | 0 | N.A. | 0 |
| ST7-AS1     | 0,017892507 | -0,13032166  | 0 | N.A. | 0 |
| RP11-274B18 | 0,017883051 |              | 0 | N.A. | 0 |
| HDAC11-AS1  | 0,017869994 | 0,083690062  | 0 | N.A. | 0 |
| ALOX12B     | 0,017845025 | -0,06093526  | 0 | N.A. | 0 |
| ZNF780A     | 0,017823982 | -0,005054383 | 0 | N.A. | 0 |
| LINC00412   | 0,017795405 |              | 0 | N.A. | 0 |
| RNF40       | 0,017775346 | 0,244267789  | 0 | N.A. | 0 |
| TRIM68      | 0,017747559 | -0,235204362 | 0 | N.A. | 0 |
| XXbac-BPG29 | 0,017743303 | -0,047645422 | 0 | N.A. | 0 |
| RP11-322E11 | 0,017723755 |              | 0 | N.A. | 0 |
| CTRC        | 0,017710712 | 0,021916774  | 0 | N.A. | 0 |
| RP11-390N6  | 0,017702079 | -0,342120796 | 0 | N.A. | 0 |
| CD84        | 0,017694391 | -0,022644435 | 0 | N.A. | 0 |
| LPAR1       | 0,017602426 | 0,246951018  | 0 | N.A. | 0 |
| TCP11       | 0,017598079 |              | 0 | N.A. | 0 |
| TULP3       | 0,017537113 | 0,028250063  | 0 | N.A. | 0 |
| AC068831.16 | 0,017491158 |              | 0 | N.A. | 0 |
| NRCAM       | 0,017481981 | 0,022886645  | 0 | N.A. | 0 |
| PCAT7       | 0,017469378 | -0,125600239 | 0 | N.A. | 0 |
| PAX2        | 0,01746073  |              | 0 | N.A. | 0 |
| RP11-81K13  | 0,017456322 |              | 0 | N.A. | 0 |
| MEFV        | 0,01745421  |              | 0 | N.A. | 0 |
| RP11-351I21 | 0,017439502 |              | 0 | N.A. | 0 |
| CTD-2240J17 | 0,017406426 |              | 0 | N.A. | 0 |
| IRF4        | 0,01734081  | 0,044112527  | 0 | N.A. | 0 |

|             |             |              |   |      |   |
|-------------|-------------|--------------|---|------|---|
| STX11       | 0,017340201 | 0,326751815  | 0 | N.A. | 0 |
| RP11-6J21.2 | 0,017315357 | -0,023947029 | 0 | N.A. | 0 |
| RP4-781K5.4 | 0,017311995 | 0,109799545  | 0 | N.A. | 0 |
| RAB7B       | 0,017277932 | 0,058509672  | 0 | N.A. | 0 |
| NIPAL4      | 0,017206477 | 0,017818375  | 0 | N.A. | 0 |
| RUNX1T1     | 0,017192008 | -0,04779246  | 0 | N.A. | 0 |
| GRIN2B      | 0,01718398  | 0,044942427  | 0 | N.A. | 0 |
| ANKRD52     | 0,017168698 | 0,147664085  | 0 | N.A. | 0 |
| ERCC5       | 0,017167722 | 0,011987908  | 0 | N.A. | 0 |
| CTD-2306A1  | 0,01715411  |              | 0 | N.A. | 0 |
| CMB9-22P13  | 0,017152032 | -0,004566147 | 0 | N.A. | 0 |
| KLHDC7A     | 0,017123952 | 0,51982487   | 0 | N.A. | 0 |
| PCYOX1L     | 0,017096616 | -0,043745053 | 0 | N.A. | 0 |
| PLCH2       | 0,017091911 | 0,208142486  | 0 | N.A. | 0 |
| CCDC183-AS  | 0,017056586 | 0,250451096  | 0 | N.A. | 0 |
| LINC01347   | 0,017035854 | -0,097864271 | 0 | N.A. | 0 |
| UXT-AS1     | 0,016959391 | -0,053006857 | 0 | N.A. | 0 |
| FLJ22447    | 0,016947394 | -0,14073666  | 0 | N.A. | 0 |
| ZNF598      | 0,016884574 | 0,047768658  | 0 | N.A. | 0 |
| PLA2G6      | 0,016870486 | 0,208633324  | 0 | N.A. | 0 |
| RP11-760H2  | 0,016867264 | -0,171884852 | 0 | N.A. | 0 |
| LRRC17      | 0,016855946 | -0,310048891 | 0 | N.A. | 0 |
| LRSAM1      | 0,016824577 | 0,033493952  | 0 | N.A. | 0 |
| IGLON5      | 0,016798917 |              | 0 | N.A. | 0 |
| NAAA        | 0,016745359 | 0,249723808  | 0 | N.A. | 0 |
| CTD-2308L2  | 0,016694698 | -0,247166968 | 0 | N.A. | 0 |
| RP5-1148A2  | 0,016692384 | 0,158534337  | 0 | N.A. | 0 |
| LHB         | 0,016692173 | 0,293291584  | 0 | N.A. | 0 |
| KLHL17      | 0,016677217 | 0,286346812  | 0 | N.A. | 0 |
| RP11-458F8  | 0,016626534 | -0,05289435  | 0 | N.A. | 0 |
| FBLN7       | 0,016609166 | -0,001657104 | 0 | N.A. | 0 |
| BCDIN3D-AS  | 0,01660713  | 0,038124893  | 0 | N.A. | 0 |
| ENG         | 0,016595365 | -0,038688448 | 0 | N.A. | 0 |

|              |             |              |   |      |   |
|--------------|-------------|--------------|---|------|---|
| DOK2         | 0,016553807 | -0,014140406 | 0 | N.A. | 0 |
| IGIP         | 0,016551982 | 0,153451135  | 0 | N.A. | 0 |
| ZNF749       | 0,016537204 | 0,077310118  | 0 | N.A. | 0 |
| CNTD1        | 0,016523973 | -0,069817109 | 0 | N.A. | 0 |
| DNAJC6       | 0,01649824  | -0,083282194 | 0 | N.A. | 0 |
| RP11-76I23.7 | 0,01648112  |              | 0 | N.A. | 0 |
| TMIGD2       | 0,0164288   |              | 0 | N.A. | 0 |
| RP11-305L7.  | 0,016395058 | 0,080731941  | 0 | N.A. | 0 |
| ATE1-AS1     | 0,016390371 | 0,10369958   | 0 | N.A. | 0 |
| RP11-573D19  | 0,016351377 | 0,023781577  | 0 | N.A. | 0 |
| RP11-395G23  | 0,016340069 | 0,263816808  | 0 | N.A. | 0 |
| VCAN         | 0,016338051 | -0,11739687  | 0 | N.A. | 0 |
| HIST1H2BH    | 0,016315475 | 0,081917865  | 0 | N.A. | 0 |
| KCNF1        | 0,016281025 |              | 0 | N.A. | 0 |
| HNRNPCL2     | 0,016253828 |              | 0 | N.A. | 0 |
| RP4-697K14.  | 0,01620959  | 0,030502774  | 0 | N.A. | 0 |
| RP11-53B2.3  | 0,016103623 |              | 0 | N.A. | 0 |
| PRKCE        | 0,0161      | 0,252813244  | 0 | N.A. | 0 |
| HDAC4        | 0,016095498 | 0,044349778  | 0 | N.A. | 0 |
| POU4F1       | 0,01606383  | 0,157779873  | 0 | N.A. | 0 |
| ZSWIM3       | 0,016047517 | 0,094694753  | 0 | N.A. | 0 |
| CCSAP        | 0,016036309 | -0,06229572  | 0 | N.A. | 0 |
| RP11-111K18  | 0,016034622 |              | 0 | N.A. | 0 |
| RP4-591N18.  | 0,016033361 |              | 0 | N.A. | 0 |
| RP5-857K21.  | 0,016011932 | 0,094111568  | 0 | N.A. | 0 |
| LTC4S        | 0,015999684 | 0,068103326  | 0 | N.A. | 0 |
| RP11-17E13.  | 0,015991972 | 0,111944823  | 0 | N.A. | 0 |
| RP11-286E11  | 0,015976852 | -0,206861277 | 0 | N.A. | 0 |
| IFT20        | 0,015972184 | 0,153457272  | 0 | N.A. | 0 |
| HIST1H2AB    | 0,015901328 | -0,193494465 | 0 | N.A. | 0 |
| CECR6        | 0,015896253 | 0,010504664  | 0 | N.A. | 0 |
| SAMSN1       | 0,015861823 | -0,294122924 | 0 | N.A. | 0 |
| CTD-2561B21  | 0,01586037  | 0,110280984  | 0 | N.A. | 0 |

|             |             |              |   |      |   |
|-------------|-------------|--------------|---|------|---|
| MALRD1      | 0,015852165 | 0,252993871  | 0 | N.A. | 0 |
| BOK         | 0,015819946 | 0,078514527  | 0 | N.A. | 0 |
| CHRFAM7A    | 0,015787441 | 0,179715805  | 0 | N.A. | 0 |
| TUBA8       | 0,015776162 | -0,032479978 | 0 | N.A. | 0 |
| IGLV3-21    | 0,015769631 | -0,167006878 | 0 | N.A. | 0 |
| ATP1B2      | 0,015766885 | 0,005977146  | 0 | N.A. | 0 |
| HCLS1       | 0,015753427 | -0,038759253 | 0 | N.A. | 0 |
| ZC2HC1A     | 0,015736471 | 0,061242284  | 0 | N.A. | 0 |
| RP11-461L13 | 0,015727726 |              | 0 | N.A. | 0 |
| GREB1       | 0,015726336 |              | 0 | N.A. | 0 |
| ZC3H4       | 0,015703004 | 0,046034922  | 0 | N.A. | 0 |
| MTMR6       | 0,015687286 | 0,082944078  | 0 | N.A. | 0 |
| RP11-571I18 | 0,015686807 | 0,04833765   | 0 | N.A. | 0 |
| HLA-DPA1    | 0,015616488 | -0,239922844 | 0 | N.A. | 0 |
| PCDH17      | 0,015583011 | -0,045576545 | 0 | N.A. | 0 |
| COLGALT2    | 0,015569139 | 0,055162417  | 0 | N.A. | 0 |
| TRIM9       | 0,015541252 | -0,032564436 | 0 | N.A. | 0 |
| RP11-59D5-- | 0,015514172 | 0,251570446  | 0 | N.A. | 0 |
| RNF165      | 0,015510375 | -0,075142175 | 0 | N.A. | 0 |
| RP13-131K19 | 0,01548839  |              | 0 | N.A. | 0 |
| PIK3CG      | 0,015469518 |              | 0 | N.A. | 0 |
| GJA4        | 0,015457547 | -0,046864356 | 0 | N.A. | 0 |
| IGLC2       | 0,015457342 | 0,018431234  | 0 | N.A. | 0 |
| ZNF362      | 0,015423663 | -0,028254825 | 0 | N.A. | 0 |
| GABRB1      | 0,015414271 | 0,262579425  | 0 | N.A. | 0 |
| CXCR3       | 0,015407354 | -0,196274474 | 0 | N.A. | 0 |
| HIF3A       | 0,015368672 | 0,062035367  | 0 | N.A. | 0 |
| BTBD2       | 0,015363989 | 0,212517609  | 0 | N.A. | 0 |
| SHISA8      | 0,015355907 |              | 0 | N.A. | 0 |
| SOX4        | 0,015329291 | 0,293999358  | 0 | N.A. | 0 |
| TAC3        | 0,015328633 | 0,192367556  | 0 | N.A. | 0 |
| SNAPC4      | 0,015328039 | -0,271739982 | 0 | N.A. | 0 |
| RP11-90K6.1 | 0,015295279 | 0,098584884  | 0 | N.A. | 0 |

|              |             |              |   |      |   |
|--------------|-------------|--------------|---|------|---|
| RP11-637A17  | 0,015294354 | 0,130680211  | 0 | N.A. | 0 |
| FAM184B      | 0,015278623 | 0,193574889  | 0 | N.A. | 0 |
| RP11-321A17  | 0,015244357 | 0,301280996  | 0 | N.A. | 0 |
| CLCN1        | 0,015235354 | -0,100511134 | 0 | N.A. | 0 |
| PTGS1        | 0,015232062 | -0,275013289 | 0 | N.A. | 0 |
| ZNF845       | 0,015198252 | -0,123209441 | 0 | N.A. | 0 |
| PLOD3        | 0,015184394 | 0,400246136  | 0 | N.A. | 0 |
| RP11-492E3.  | 0,015141916 | -0,023397754 | 0 | N.A. | 0 |
| AGTPBP1      | 0,015121331 | 0,098985779  | 0 | N.A. | 0 |
| GBGT1        | 0,015035678 | -0,037655801 | 0 | N.A. | 0 |
| CITF22-92A6  | 0,014939917 | -0,034314129 | 0 | N.A. | 0 |
| ZNF765       | 0,014912955 | 0,227323316  | 0 | N.A. | 0 |
| CYP2R1       | 0,014905296 | 0,168401539  | 0 | N.A. | 0 |
| IL31RA       | 0,014892253 |              | 0 | N.A. | 0 |
| RP11-15J22.8 | 0,014889936 | -0,135476377 | 0 | N.A. | 0 |
| RRP12        | 0,014877034 | -0,016558899 | 0 | N.A. | 0 |
| UBXN2A       | 0,014856344 | -0,027582775 | 0 | N.A. | 0 |
| AC010524.2   | 0,014839306 |              | 0 | N.A. | 0 |
| PDE10A       | 0,014829912 | 0,06563373   | 0 | N.A. | 0 |
| SLITRK6      | 0,014825454 | 0,02057934   | 0 | N.A. | 0 |
| TSIX         | 0,014822073 | 0,010235304  | 0 | N.A. | 0 |
| CLCN4        | 0,014740351 | -0,039510793 | 0 | N.A. | 0 |
| PLCD1        | 0,014701881 | -0,116394452 | 0 | N.A. | 0 |
| AF186192.1   | 0,014665406 |              | 0 | N.A. | 0 |
| KB-1183D5.1  | 0,014635573 | 0,099327318  | 0 | N.A. | 0 |
| DLGAP4-AS1   | 0,014633696 | -0,083702087 | 0 | N.A. | 0 |
| ZNF782       | 0,014621919 | -0,177627261 | 0 | N.A. | 0 |
| LINC01183    | 0,014616003 | 0,063289713  | 0 | N.A. | 0 |
| AC007405.6   | 0,014583021 | -0,016545825 | 0 | N.A. | 0 |
| RP5-1074L1.4 | 0,014577703 | 0,164427717  | 0 | N.A. | 0 |
| RP11-98D18.  | 0,014545505 |              | 0 | N.A. | 0 |
| PODNL1       | 0,014542172 | -0,058611856 | 0 | N.A. | 0 |
| RP11-309M2   | 0,014533693 |              | 0 | N.A. | 0 |

|              |             |              |   |      |   |
|--------------|-------------|--------------|---|------|---|
| PHKG1        | 0,014527077 | -0,085501079 | 0 | N.A. | 0 |
| RP11-158M2   | 0,014505649 |              | 0 | N.A. | 0 |
| C1orf204     | 0,0144873   | 0,127795785  | 0 | N.A. | 0 |
| AC078883.4   | 0,014478583 | -0,029043239 | 0 | N.A. | 0 |
| METTL20      | 0,014438788 | 0,214434305  | 0 | N.A. | 0 |
| RP11-343L5.1 | 0,014431709 |              | 0 | N.A. | 0 |
| BAD          | 0,0143881   | 0,317016731  | 0 | N.A. | 0 |
| STOML1       | 0,014347189 | 0,306637255  | 0 | N.A. | 0 |
| KIAA1244     | 0,014308222 | 0,242690038  | 0 | N.A. | 0 |
| SYNGR1       | 0,014289548 | -0,164102079 | 0 | N.A. | 0 |
| RP11-171I2.5 | 0,014288176 | 0,138724784  | 0 | N.A. | 0 |
| RP11-689K5.1 | 0,014281166 | -0,011135635 | 0 | N.A. | 0 |
| RP11-725P16  | 0,014279585 | -0,132146375 | 0 | N.A. | 0 |
| RP11-305L7.1 | 0,014245455 |              | 0 | N.A. | 0 |
| SLCO1B1      | 0,014238986 | -0,075643647 | 0 | N.A. | 0 |
| OIT3         | 0,014169728 | 0,101741538  | 0 | N.A. | 0 |
| PCDH10       | 0,014132156 |              | 0 | N.A. | 0 |
| SPATA13-AS1  | 0,014132156 |              | 0 | N.A. | 0 |
| ENTPD1       | 0,014131207 | -0,279897627 | 0 | N.A. | 0 |
| RP11-51J9.5  | 0,014130029 | -0,130600901 | 0 | N.A. | 0 |
| ZNF284       | 0,014110474 | 0,259073012  | 0 | N.A. | 0 |
| RP13-616I3.1 | 0,01408304  | 0,184691455  | 0 | N.A. | 0 |
| TOPORS       | 0,014072613 | -0,009772795 | 0 | N.A. | 0 |
| CREB3L3      | 0,014062801 | 0,030797786  | 0 | N.A. | 0 |
| SP8          | 0,014037666 | -0,151996142 | 0 | N.A. | 0 |
| EDRF1        | 0,014032273 | 0,12759243   | 0 | N.A. | 0 |
| POLB         | 0,014018589 | 0,074447448  | 0 | N.A. | 0 |
| TGFB1I1      | 0,013966364 | 0,02349361   | 0 | N.A. | 0 |
| DCTN5        | 0,013929671 | 0,199480242  | 0 | N.A. | 0 |
| UBE2G1       | 0,013895772 | 0,180358149  | 0 | N.A. | 0 |
| AC009480.3   | 0,013867764 |              | 0 | N.A. | 0 |
| S100B        | 0,013841046 | 0,260396865  | 0 | N.A. | 0 |
| PITRM1       | 0,013791781 | 0,028620176  | 0 | N.A. | 0 |

|              |             |              |   |      |   |
|--------------|-------------|--------------|---|------|---|
| NPTXR        | 0,01376941  |              | 0 | N.A. | 0 |
| RP11-245J9.4 | 0,013757297 |              | 0 | N.A. | 0 |
| KCNK9        | 0,013753013 | 0,241535926  | 0 | N.A. | 0 |
| MATK         | 0,013738503 | -0,093256732 | 0 | N.A. | 0 |
| ZEB1         | 0,013713098 | 0,039704742  | 0 | N.A. | 0 |
| CASC1        | 0,013694969 | -0,098480882 | 0 | N.A. | 0 |
| AC010745.1   | 0,013675569 | 0,204180681  | 0 | N.A. | 0 |
| NMB          | 0,013660976 | 0,137317153  | 0 | N.A. | 0 |
| AC007040.11  | 0,013568747 | 0,186817608  | 0 | N.A. | 0 |
| SEPT14       | 0,013565918 |              | 0 | N.A. | 0 |
| PPP1R16B     | 0,013517802 | -0,338316193 | 0 | N.A. | 0 |
| SLC7A8       | 0,013502587 | 0,008702714  | 0 | N.A. | 0 |
| AP001372.2   | 0,013489016 | -0,167142506 | 0 | N.A. | 0 |
| ESRP2        | 0,013477591 | 0,214427376  | 0 | N.A. | 0 |
| RP1-140A9.1  | 0,013426885 | 0,051650342  | 0 | N.A. | 0 |
| IGHV3-53     | 0,01341184  |              | 0 | N.A. | 0 |
| RP11-522B15  | 0,013406779 | 0,151291396  | 0 | N.A. | 0 |
| IGLV1-47     | 0,013376586 | -0,024260374 | 0 | N.A. | 0 |
| SLC13A5      | 0,013349674 | 0,075192094  | 0 | N.A. | 0 |
| ZNF540       | 0,013348174 | -0,010528766 | 0 | N.A. | 0 |
| ZFPM1        | 0,013309411 | 0,106039464  | 0 | N.A. | 0 |
| RP11-284F21  | 0,013250643 | 0,017920904  | 0 | N.A. | 0 |
| ARHGEF11     | 0,013249739 | 0,167295808  | 0 | N.A. | 0 |
| RP11-580I16  | 0,013242409 | -0,088447378 | 0 | N.A. | 0 |
| UGDH-AS1     | 0,013240095 | -0,158797989 | 0 | N.A. | 0 |
| IGHV4-34     | 0,013162254 | -0,077037333 | 0 | N.A. | 0 |
| RP11-212P7.  | 0,013156498 | 0,16964377   | 0 | N.A. | 0 |
| RP11-284F21  | 0,01314967  | 0,209723953  | 0 | N.A. | 0 |
| RP11-353K11  | 0,013135093 | 0,040750523  | 0 | N.A. | 0 |
| RP11-475O23  | 0,013130052 | 0,00111828   | 0 | N.A. | 0 |
| RP11-138E2.  | 0,013048591 |              | 0 | N.A. | 0 |
| KIZ          | 0,01298554  | 0,180154443  | 0 | N.A. | 0 |
| AVPR1A       | 0,012878779 |              | 0 | N.A. | 0 |

|             |             |              |   |      |   |
|-------------|-------------|--------------|---|------|---|
| KB-68A7.1   | 0,012870464 |              | 0 | N.A. | 0 |
| AC079305.10 | 0,012838573 | 0,053001534  | 0 | N.A. | 0 |
| BCAS3       | 0,012829918 | 0,01513724   | 0 | N.A. | 0 |
| ERCC6L2     | 0,01282112  | -0,128615191 | 0 | N.A. | 0 |
| PHKG2       | 0,012791522 | -0,228167371 | 0 | N.A. | 0 |
| FAM199X     | 0,012786222 | 0,207870592  | 0 | N.A. | 0 |
| FST         | 0,012780733 | -0,104526445 | 0 | N.A. | 0 |
| USP33       | 0,012778527 | 0,37184199   | 0 | N.A. | 0 |
| HOXA10-AS   | 0,012768558 | -0,034612227 | 0 | N.A. | 0 |
| RP11-304L19 | 0,012710513 | -0,083393705 | 0 | N.A. | 0 |
| HOXD-AS2    | 0,012690561 | 0,203940161  | 0 | N.A. | 0 |
| AP2B1       | 0,012681917 | 0,183189905  | 0 | N.A. | 0 |
| LL21NC02-21 | 0,012670415 | -0,331793594 | 0 | N.A. | 0 |
| RP11-1055B8 | 0,012667512 |              | 0 | N.A. | 0 |
| C9orf3      | 0,012649735 | 0,17494365   | 0 | N.A. | 0 |
| SULT1E1     | 0,01262246  | 0,005243415  | 0 | N.A. | 0 |
| AC004257.1  | 0,012601098 |              | 0 | N.A. | 0 |
| CTD-3074O7  | 0,012596327 | -0,21537207  | 0 | N.A. | 0 |
| RP11-849H4. | 0,012460248 | -0,208876646 | 0 | N.A. | 0 |
| DNASE1L2    | 0,012456807 | 0,171268238  | 0 | N.A. | 0 |
| RP11-274B21 | 0,012455198 | 0,215590907  | 0 | N.A. | 0 |
| CTD-3185P2. | 0,012441875 | 0,066209146  | 0 | N.A. | 0 |
| RP11-503N18 | 0,012407833 | 0,11725184   | 0 | N.A. | 0 |
| SNX32       | 0,0123523   | -0,168095269 | 0 | N.A. | 0 |
| BIN3        | 0,012348305 | 0,048437149  | 0 | N.A. | 0 |
| CTD-2302E22 | 0,012307791 |              | 0 | N.A. | 0 |
| PHEX        | 0,01230205  | -0,065761911 | 0 | N.A. | 0 |
| APTR        | 0,012289274 | -0,113293494 | 0 | N.A. | 0 |
| NPDC1       | 0,012274867 | 0,172238698  | 0 | N.A. | 0 |
| MGAT4C      | 0,0122697   |              | 0 | N.A. | 0 |
| RP5-1050D4. | 0,012261336 | -0,1266003   | 0 | N.A. | 0 |
| RP11-134G8. | 0,012254513 | 0,030848325  | 0 | N.A. | 0 |
| IGHG3       | 0,012254126 | -0,092326291 | 0 | N.A. | 0 |



|             |             |              |   |      |   |
|-------------|-------------|--------------|---|------|---|
| SNCA        | 0,012242964 | -0,022041608 | 0 | N.A. | 0 |
| RP11-486A14 | 0,012220932 | 0,113564193  | 0 | N.A. | 0 |
| C21orf91    | 0,012208099 | 0,055474691  | 0 | N.A. | 0 |
| TM4SF19-AS  | 0,012176847 | 0,027284596  | 0 | N.A. | 0 |
| ZNF71       | 0,012165714 | 0,00611082   | 0 | N.A. | 0 |
| TBC1D3D     | 0,012119885 | 0,169372117  | 0 | N.A. | 0 |
| GALNTL6     | 0,01210239  |              | 0 | N.A. | 0 |
| MYH4        | 0,012021104 | -0,249782363 | 0 | N.A. | 0 |
| SELL        | 0,011984851 | -0,322179136 | 0 | N.A. | 0 |
| AC005339.2  | 0,011954995 | -0,20469643  | 0 | N.A. | 0 |
| GCN1L1      | 0,011930239 | 0,127077569  | 0 | N.A. | 0 |
| FSIP2-AS1   | 0,011916806 | -0,113896976 | 0 | N.A. | 0 |
| RP1-167O22  | 0,011915138 |              | 0 | N.A. | 0 |
| RP11-346C20 | 0,011895289 | 0,053748625  | 0 | N.A. | 0 |
| XKR6        | 0,011846514 | -0,08156105  | 0 | N.A. | 0 |
| INSL6       | 0,01180588  |              | 0 | N.A. | 0 |
| ZNF112      | 0,011776206 | 0,366354014  | 0 | N.A. | 0 |
| DCUN1D2     | 0,011672526 | -0,105465287 | 0 | N.A. | 0 |
| SMARCD3     | 0,011659297 |              | 0 | N.A. | 0 |
| POLR2M      | 0,011612536 | -0,033623578 | 0 | N.A. | 0 |
| SEPSECS     | 0,011606042 | 0,161570471  | 0 | N.A. | 0 |
| ARHGAP31-A  | 0,011515465 |              | 0 | N.A. | 0 |
| ADAM20P1    | 0,011509074 | 0,487261893  | 0 | N.A. | 0 |
| HAR1A       | 0,01150701  | -0,176540049 | 0 | N.A. | 0 |
| KCNJ12      | 0,011450235 |              | 0 | N.A. | 0 |
| ZNF793-AS1  | 0,011443069 | -0,022717094 | 0 | N.A. | 0 |
| AC092171.2  | 0,011402143 | 0,362548775  | 0 | N.A. | 0 |
| GS1-279B7.2 | 0,01139815  | 0,083283446  | 0 | N.A. | 0 |
| EPHB1       | 0,011387351 | 0,086953632  | 0 | N.A. | 0 |
| AP000442.1  | 0,011319965 | 0,321760411  | 0 | N.A. | 0 |
| TTC39A-AS1  | 0,011307737 | -0,1201726   | 0 | N.A. | 0 |
| HIST3H2BB   | 0,011280659 | -0,004357548 | 0 | N.A. | 0 |
| CEP104      | 0,011265108 | 0,118850368  | 0 | N.A. | 0 |

|              |             |              |   |      |   |
|--------------|-------------|--------------|---|------|---|
| ZNF480       | 0,011261503 | 0,105281514  | 0 | N.A. | 0 |
| ST3GAL5      | 0,011242133 | -0,059303871 | 0 | N.A. | 0 |
| RGS12        | 0,011157629 | 0,224056537  | 0 | N.A. | 0 |
| SHISA5       | 0,011133096 | 0,184828793  | 0 | N.A. | 0 |
| AC000111.6   | 0,011120775 | -0,23682514  | 0 | N.A. | 0 |
| PICK1        | 0,011082086 | 0,025691093  | 0 | N.A. | 0 |
| SLAMF7       | 0,01108063  | 0,049348267  | 0 | N.A. | 0 |
| WASH1        | 0,011060494 | 0,396932261  | 0 | N.A. | 0 |
| AC005481.5   | 0,011059089 | 0,05600904   | 0 | N.A. | 0 |
| UNC79        | 0,011014473 | -0,220132295 | 0 | N.A. | 0 |
| UGT1A1       | 0,011010143 | 0,065330048  | 0 | N.A. | 0 |
| CGNL1        | 0,010979761 | 0,292578166  | 0 | N.A. | 0 |
| CCDC154      | 0,010968793 | 0,11531601   | 0 | N.A. | 0 |
| CLSTN3       | 0,010955933 | 0,11495415   | 0 | N.A. | 0 |
| IL1RL1       | 0,01095541  |              | 0 | N.A. | 0 |
| RB1          | 0,010890783 | 0,386007006  | 0 | N.A. | 0 |
| ITLN2        | 0,010879782 |              | 0 | N.A. | 0 |
| CH507-338C   | 0,010798988 | 0,189290882  | 0 | N.A. | 0 |
| MRAP2        | 0,010762006 | -0,186203265 | 0 | N.A. | 0 |
| RP11-96K19.  | 0,010746741 | -0,05815157  | 0 | N.A. | 0 |
| PCDHB11      | 0,01073712  | 0,07659815   | 0 | N.A. | 0 |
| RP1-170O19.  | 0,010736781 | 0,019406168  | 0 | N.A. | 0 |
| RP11-74J13.8 | 0,010686975 | -0,171599889 | 0 | N.A. | 0 |
| UNQ6494      | 0,010681638 | 0,002158595  | 0 | N.A. | 0 |
| LINC00479    | 0,010652527 | 0,192650865  | 0 | N.A. | 0 |
| RP11-431J24  | 0,010621061 | -0,065317963 | 0 | N.A. | 0 |
| KIF17        | 0,010617988 |              | 0 | N.A. | 0 |
| PMEL         | 0,010591933 | -0,285257133 | 0 | N.A. | 0 |
| FBXW10       | 0,010591721 | 0,017910863  | 0 | N.A. | 0 |
| HNF4A-AS1    | 0,010558575 |              | 0 | N.A. | 0 |
| RP4-761J14.8 | 0,010540736 | -0,303905067 | 0 | N.A. | 0 |
| TBX19        | 0,010484145 | 0,114821256  | 0 | N.A. | 0 |
| HIATL1       | 0,0104784   | 0,181151249  | 0 | N.A. | 0 |

|              |             |              |   |      |   |
|--------------|-------------|--------------|---|------|---|
| KB-1208A12.  | 0,010427502 | 0,02969958   | 0 | N.A. | 0 |
| AIRN         | 0,010413689 | -0,03847024  | 0 | N.A. | 0 |
| C1QA         | 0,010393478 | 0,059618895  | 0 | N.A. | 0 |
| C19orf18     | 0,010393292 | -0,059431967 | 0 | N.A. | 0 |
| PAX5         | 0,010344091 | -0,230112138 | 0 | N.A. | 0 |
| MYO5C        | 0,010340658 | 0,284014835  | 0 | N.A. | 0 |
| RP13-766D20  | 0,010335309 |              | 0 | N.A. | 0 |
| RP11-398C13  | 0,010330222 | 0,098620049  | 0 | N.A. | 0 |
| PKD1L1       | 0,010260477 | -0,286209907 | 0 | N.A. | 0 |
| CYTH4        | 0,010250896 | -0,006856285 | 0 | N.A. | 0 |
| ZNF169       | 0,010160722 | -0,121279676 | 0 | N.A. | 0 |
| SRGAP2B      | 0,010155399 | -0,004508314 | 0 | N.A. | 0 |
| WDR82        | 0,010104691 | 0,004117868  | 0 | N.A. | 0 |
| AC009120.10  | 0,010060099 | 0,207888509  | 0 | N.A. | 0 |
| RP11-502I4.3 | 0,010029397 | -0,010661658 | 0 | N.A. | 0 |
| GGT2         | 0,010020214 | 0,271918044  | 0 | N.A. | 0 |
| RP11-770G2.  | 0,010004946 | 0,211323737  | 0 | N.A. | 0 |
| MEP1B        | 0,009995738 | -0,112715575 | 0 | N.A. | 0 |
| C9orf9       | 0,009967354 | -0,175785605 | 0 | N.A. | 0 |
| FGF22        | 0,009954124 | 0,008201033  | 0 | N.A. | 0 |
| LINC01146    | 0,009918056 | 0,055701115  | 0 | N.A. | 0 |
| RNGTT        | 0,009914108 | 0,097848788  | 0 | N.A. | 0 |
| IGLV6-57     | 0,009891736 |              | 0 | N.A. | 0 |
| ILK          | 0,009864885 | 0,028776254  | 0 | N.A. | 0 |
| C9orf41      | 0,009852633 | -0,003637598 | 0 | N.A. | 0 |
| LINC01511    | 0,009849652 | 0,246224317  | 0 | N.A. | 0 |
| DCP1A        | 0,009805261 | 0,21708499   | 0 | N.A. | 0 |
| RP11-297D21  | 0,009758794 | 0,1678942    | 0 | N.A. | 0 |
| ASAH1        | 0,009719663 | 0,283999523  | 0 | N.A. | 0 |
| ASIC4        | 0,009705271 | 0,010416942  | 0 | N.A. | 0 |
| PTPN6        | 0,009695425 | 0,109972971  | 0 | N.A. | 0 |
| AP000254.8   | 0,009680688 | 0,286009167  | 0 | N.A. | 0 |
| AC004878.2   | 0,009672294 | 0,195175317  | 0 | N.A. | 0 |

|             |             |              |   |      |   |
|-------------|-------------|--------------|---|------|---|
| CTC-508F8.1 | 0,00965378  | -0,361757006 | 0 | N.A. | 0 |
| ZNF503      | 0,009645037 | 0,102937879  | 0 | N.A. | 0 |
| TRHDE       | 0,009635338 | 0,028202894  | 0 | N.A. | 0 |
| CHST7       | 0,009631173 | 0,167935084  | 0 | N.A. | 0 |
| MIEF1       | 0,009596576 | 0,002886596  | 0 | N.A. | 0 |
| MPPED2      | 0,009569591 | -0,014686827 | 0 | N.A. | 0 |
| ITGAM       | 0,009507061 | -0,249805844 | 0 | N.A. | 0 |
| IKZF3       | 0,009505926 | -0,243005947 | 0 | N.A. | 0 |
| RP11-137H2. | 0,009496324 | -0,158499496 | 0 | N.A. | 0 |
| CWC25       | 0,009490952 | 0,101562095  | 0 | N.A. | 0 |
| COLEC12     | 0,009481734 | -0,000821791 | 0 | N.A. | 0 |
| ARHGEF25    | 0,009463369 |              | 0 | N.A. | 0 |
| RP11-287D1. | 0,009430683 | -0,093248938 | 0 | N.A. | 0 |
| ADH4        | 0,009426894 | 0,153965648  | 0 | N.A. | 0 |
| FBLN2       | 0,009375466 | -0,258175263 | 0 | N.A. | 0 |
| P2RY10      | 0,009342602 | -0,238373313 | 0 | N.A. | 0 |
| PILRA       | 0,00934057  | 0,205060088  | 0 | N.A. | 0 |
| PTER        | 0,009327534 | 0,10233176   | 0 | N.A. | 0 |
| DNAJC25-GN  | 0,009319921 | -0,187276248 | 0 | N.A. | 0 |
| ABCD4       | 0,009318275 | 0,19736139   | 0 | N.A. | 0 |
| RP5-1042K10 | 0,009234607 | 0,172425522  | 0 | N.A. | 0 |
| KIR3DX1     | 0,009201362 |              | 0 | N.A. | 0 |
| C6orf48     | 0,009189172 | -0,252912459 | 0 | N.A. | 0 |
| KRTAP5-10   | 0,009186473 | 0,165799013  | 0 | N.A. | 0 |
| PLCXD2      | 0,009141488 | 0,020165779  | 0 | N.A. | 0 |
| ATP10A      | 0,00910606  | -0,190195551 | 0 | N.A. | 0 |
| STAC3       | 0,009069993 | -0,004403648 | 0 | N.A. | 0 |
| MAGED2      | 0,009064102 | -0,033336711 | 0 | N.A. | 0 |
| ADGB        | 0,009045223 | -0,269612078 | 0 | N.A. | 0 |
| IGFBP7      | 0,009014504 | -0,258883584 | 0 | N.A. | 0 |
| RDH5        | 0,009006124 | 0,233608029  | 0 | N.A. | 0 |
| C5orf45     | 0,008972964 | -0,163895786 | 0 | N.A. | 0 |
| CHI3L2      | 0,008968881 | -0,173878502 | 0 | N.A. | 0 |

|             |             |              |   |      |   |
|-------------|-------------|--------------|---|------|---|
| ABAT        | 0,008942404 | 0,072599412  | 0 | N.A. | 0 |
| POU3F1      | 0,008930824 |              | 0 | N.A. | 0 |
| RP11-454P21 | 0,008892895 | -0,009577256 | 0 | N.A. | 0 |
| TMCC1-AS1   | 0,008888866 | 0,107468745  | 0 | N.A. | 0 |
| STX8        | 0,0088866   | -0,091576248 | 0 | N.A. | 0 |
| USP47       | 0,008872051 | 0,240057323  | 0 | N.A. | 0 |
| RP11-455F5. | 0,008847232 | -0,221307029 | 0 | N.A. | 0 |
| RP11-692C24 | 0,008843929 | -0,071888049 | 0 | N.A. | 0 |
| GHR         | 0,008843444 | -0,21381232  | 0 | N.A. | 0 |
| CD101       | 0,008785539 |              | 0 | N.A. | 0 |
| SLC4A9      | 0,008785237 | 0,138580493  | 0 | N.A. | 0 |
| RP11-676J12 | 0,008775095 |              | 0 | N.A. | 0 |
| SENP3       | 0,008755606 | -0,10540165  | 0 | N.A. | 0 |
| PRH1        | 0,008741564 | -0,021791371 | 0 | N.A. | 0 |
| PROSER3     | 0,008686192 | 0,029857066  | 0 | N.A. | 0 |
| SOX18       | 0,00866678  | 0,075400901  | 0 | N.A. | 0 |
| KIT         | 0,008655018 | -0,000464747 | 0 | N.A. | 0 |
| REPS1       | 0,008651054 | 0,165385235  | 0 | N.A. | 0 |
| LINC00954   | 0,008595725 | -0,098601    | 0 | N.A. | 0 |
| RP11-265E18 | 0,008577713 | 0,440500658  | 0 | N.A. | 0 |
| NAPA-AS1    | 0,008574469 | 0,043255277  | 0 | N.A. | 0 |
| CA5B        | 0,008536037 | -0,211235759 | 0 | N.A. | 0 |
| ZNF486      | 0,008527535 | 0,050434886  | 0 | N.A. | 0 |
| PDE6D       | 0,008525274 | -0,051165677 | 0 | N.A. | 0 |
| ACVR1B      | 0,008472775 | 0,115713929  | 0 | N.A. | 0 |
| TWF2        | 0,00845973  | 0,153079867  | 0 | N.A. | 0 |
| CHN2        | 0,008451217 | -0,190475252 | 0 | N.A. | 0 |
| RP11-76P2.4 | 0,008416106 |              | 0 | N.A. | 0 |
| RP11-388M2  | 0,008407288 | 0,127527232  | 0 | N.A. | 0 |
| C11orf72    | 0,008341587 |              | 0 | N.A. | 0 |
| ZSWIM5      | 0,008331478 | 0,037122877  | 0 | N.A. | 0 |
| NDUFV2-AS1  | 0,008278631 | 0,08991084   | 0 | N.A. | 0 |
| RP5-1091N2. | 0,008274908 |              | 0 | N.A. | 0 |

|             |             |              |   |      |   |
|-------------|-------------|--------------|---|------|---|
| C11orf70    | 0,008250968 | -0,281734626 | 0 | N.A. | 0 |
| ZNF843      | 0,008231479 | -0,184548716 | 0 | N.A. | 0 |
| BGLAP       | 0,008201898 | 0,040021711  | 0 | N.A. | 0 |
| RP11-1260E1 | 0,008180288 | -0,345025285 | 0 | N.A. | 0 |
| CACNA2D4    | 0,008135818 | 0,195163289  | 0 | N.A. | 0 |
| USP11       | 0,008135538 | 0,043418952  | 0 | N.A. | 0 |
| NAPA        | 0,008082317 | 0,241447716  | 0 | N.A. | 0 |
| ACOX3       | 0,008077469 | 0,001289673  | 0 | N.A. | 0 |
| RP11-265O1  | 0,008076252 |              | 0 | N.A. | 0 |
| SDF4        | 0,008070054 | 0,448886056  | 0 | N.A. | 0 |
| RP11-262A16 | 0,008060967 |              | 0 | N.A. | 0 |
| RP11-613D13 | 0,008060125 | -0,215829369 | 0 | N.A. | 0 |
| NOV         | 0,008041282 | 0,030806489  | 0 | N.A. | 0 |
| ZNF425      | 0,008039447 | 0,005376476  | 0 | N.A. | 0 |
| LINC00535   | 0,00803724  | -0,044460358 | 0 | N.A. | 0 |
| AF127936.3  | 0,008022262 | -0,072224274 | 0 | N.A. | 0 |
| PPARGC1A    | 0,008017293 | 0,186535657  | 0 | N.A. | 0 |
| ATF2        | 0,008014328 | -0,08369258  | 0 | N.A. | 0 |
| FP325317.1  | 0,007954884 |              | 0 | N.A. | 0 |
| ZNF20       | 0,007915973 | -0,288785629 | 0 | N.A. | 0 |
| SFRP4       | 0,007911607 | 0,064395603  | 0 | N.A. | 0 |
| IDUA        | 0,007908183 | 0,252029074  | 0 | N.A. | 0 |
| KRTAP5-AS1  | 0,007879769 | 0,161093979  | 0 | N.A. | 0 |
| PGC         | 0,007861623 | -0,299984731 | 0 | N.A. | 0 |
| SNX10       | 0,007851018 | -0,377532316 | 0 | N.A. | 0 |
| TMED8       | 0,007847178 | -0,227579931 | 0 | N.A. | 0 |
| ZNF737      | 0,00783796  | 0,162514107  | 0 | N.A. | 0 |
| NKTR        | 0,007768903 | 0,261652463  | 0 | N.A. | 0 |
| C21orf62    | 0,0077522   | -0,185610101 | 0 | N.A. | 0 |
| IL17RD      | 0,007737884 | 0,053349881  | 0 | N.A. | 0 |
| COL5A1      | 0,00772114  | 0,028378084  | 0 | N.A. | 0 |
| FBXO25      | 0,007676862 | -0,294608394 | 0 | N.A. | 0 |
| PGF         | 0,007667724 | 0,065058571  | 0 | N.A. | 0 |

|             |             |              |   |      |   |
|-------------|-------------|--------------|---|------|---|
| MFAP4       | 0,007665348 | 0,230948298  | 0 | N.A. | 0 |
| WDR89       | 0,007614371 | 0,072348983  | 0 | N.A. | 0 |
| DCAF8       | 0,007613293 | 0,090363341  | 0 | N.A. | 0 |
| KRTAP5-8    | 0,007567259 |              | 0 | N.A. | 0 |
| LINC00299   | 0,00755043  | -0,076753258 | 0 | N.A. | 0 |
| MORC2-AS1   | 0,007525007 | -0,205543702 | 0 | N.A. | 0 |
| RP4-781K5.2 | 0,007478426 | 0,022607379  | 0 | N.A. | 0 |
| NOL4        | 0,007460003 | -0,080980724 | 0 | N.A. | 0 |
| ZNF682      | 0,007449529 | -0,204164911 | 0 | N.A. | 0 |
| HMGXB3      | 0,007436494 | 0,087480341  | 0 | N.A. | 0 |
| ZNF713      | 0,007392744 | -0,320397194 | 0 | N.A. | 0 |
| ZCWPW2      | 0,007333599 | -0,163055471 | 0 | N.A. | 0 |
| ALG1L       | 0,007320969 | -0,062434136 | 0 | N.A. | 0 |
| ETNK2       | 0,007310789 | 0,270026257  | 0 | N.A. | 0 |
| C12orf76    | 0,007303279 | -0,015034689 | 0 | N.A. | 0 |
| APOBEC3D    | 0,007301355 | -0,151380459 | 0 | N.A. | 0 |
| LINC00266-1 | 0,007298308 |              | 0 | N.A. | 0 |
| IFNG        | 0,007272554 |              | 0 | N.A. | 0 |
| TPD52       | 0,007248916 | 0,336238485  | 0 | N.A. | 0 |
| RP4-734G22. | 0,007226121 | -0,118158327 | 0 | N.A. | 0 |
| USP40       | 0,007219481 | 0,193539969  | 0 | N.A. | 0 |
| PTCHD2      | 0,007187239 | 0,047755693  | 0 | N.A. | 0 |
| QSER1       | 0,007151171 | 0,056193826  | 0 | N.A. | 0 |
| GABRB2      | 0,007150215 | -0,119583812 | 0 | N.A. | 0 |
| AARSD1      | 0,007148008 | 0,067364514  | 0 | N.A. | 0 |
| UCN2        | 0,007136976 | 0,333407989  | 0 | N.A. | 0 |
| ABHD8       | 0,007130244 | 0,057359224  | 0 | N.A. | 0 |
| DFNB31      | 0,007129726 | 0,141754576  | 0 | N.A. | 0 |
| SMNDC1      | 0,007103774 | 0,071854995  | 0 | N.A. | 0 |
| RP11-346D14 | 0,007075319 | 0,01159259   | 0 | N.A. | 0 |
| EP400       | 0,006991811 | 0,262233674  | 0 | N.A. | 0 |
| RP11-180M1  | 0,006977107 | -0,164110214 | 0 | N.A. | 0 |
| RP5-933K21. | 0,006960014 |              | 0 | N.A. | 0 |

|              |             |              |   |      |   |
|--------------|-------------|--------------|---|------|---|
| AC018737.3   | 0,006952013 | 0,024083864  | 0 | N.A. | 0 |
| LDB2         | 0,006928066 |              | 0 | N.A. | 0 |
| ARL15        | 0,006847575 | 0,197464252  | 0 | N.A. | 0 |
| RP1-125I3.2  | 0,006829888 |              | 0 | N.A. | 0 |
| CDH15        | 0,006810918 | -0,132231705 | 0 | N.A. | 0 |
| RP11-522M2   | 0,006799199 | 0,227663316  | 0 | N.A. | 0 |
| RP4-583P15.  | 0,006766271 | 0,023235001  | 0 | N.A. | 0 |
| RP11-1143G9  | 0,006747704 | 0,076614116  | 0 | N.A. | 0 |
| RP11-2B6.2   | 0,006734405 | -0,020686283 | 0 | N.A. | 0 |
| SPDYC        | 0,006734134 | 0,196513167  | 0 | N.A. | 0 |
| RP5-965G21.  | 0,00671285  | 0,425851595  | 0 | N.A. | 0 |
| RP11-365P13  | 0,00671161  | 0,187909291  | 0 | N.A. | 0 |
| C17orf50     | 0,006705681 |              | 0 | N.A. | 0 |
| CTD-2047H1   | 0,006688275 |              | 0 | N.A. | 0 |
| KLHL31       | 0,006672294 | -0,009243008 | 0 | N.A. | 0 |
| CD40LG       | 0,006649492 |              | 0 | N.A. | 0 |
| CTC-529I10.1 | 0,006645456 | 0,283399912  | 0 | N.A. | 0 |
| RBM38        | 0,00664339  | 0,133521548  | 0 | N.A. | 0 |
| RP11-131L23  | 0,0066331   | 0,010107048  | 0 | N.A. | 0 |
| TNFRSF13C    | 0,006613061 | -0,103448968 | 0 | N.A. | 0 |
| CEP83-AS1    | 0,006605863 | 0,005495921  | 0 | N.A. | 0 |
| RP11-282O18  | 0,006580274 |              | 0 | N.A. | 0 |
| LAPTM5       | 0,006556087 | -0,408581301 | 0 | N.A. | 0 |
| LINC00886    | 0,006538706 | 0,10506728   | 0 | N.A. | 0 |
| FAM227B      | 0,006537426 | 0,117367782  | 0 | N.A. | 0 |
| DDX59        | 0,006510667 | 0,038445631  | 0 | N.A. | 0 |
| ZMYM4        | 0,006505834 | 0,111166698  | 0 | N.A. | 0 |
| UNC93A       | 0,006434155 | -0,076022853 | 0 | N.A. | 0 |
| CTC-518P12.  | 0,006432579 | 0,033951211  | 0 | N.A. | 0 |
| RP11-108M9   | 0,006426791 | -0,157105555 | 0 | N.A. | 0 |
| EML5         | 0,006391619 | 0,168112135  | 0 | N.A. | 0 |
| SYNE1        | 0,006367049 | -0,038330236 | 0 | N.A. | 0 |
| FAM156A      | 0,006346908 | 0,137582472  | 0 | N.A. | 0 |



|             |             |              |   |      |   |
|-------------|-------------|--------------|---|------|---|
| HOXB-AS4    | 0,006338125 |              | 0 | N.A. | 0 |
| PGBD2       | 0,006294314 | -0,147773125 | 0 | N.A. | 0 |
| RP11-57H12. | 0,006292054 | -0,007230728 | 0 | N.A. | 0 |
| UTRN        | 0,00625038  | 0,320925841  | 0 | N.A. | 0 |
| LSP1        | 0,006243874 | -0,249820617 | 0 | N.A. | 0 |
| NEU3        | 0,006229041 | -0,172537274 | 0 | N.A. | 0 |
| CEP44       | 0,006226459 | -0,126515085 | 0 | N.A. | 0 |
| BBS4        | 0,006209236 | 0,101435366  | 0 | N.A. | 0 |
| FBXO30      | 0,006187835 | -0,180773948 | 0 | N.A. | 0 |
| AP5S1       | 0,006163547 | 0,205242417  | 0 | N.A. | 0 |
| CYP26A1     | 0,006144631 |              | 0 | N.A. | 0 |
| RP11-25H12. | 0,006133145 | -0,170618441 | 0 | N.A. | 0 |
| TMEM59L     | 0,00612096  |              | 0 | N.A. | 0 |
| PECAM1      | 0,006119541 | -0,168147867 | 0 | N.A. | 0 |
| ZBTB11-AS1  | 0,006063857 | 0,302861399  | 0 | N.A. | 0 |
| PRKD1       | 0,006061884 |              | 0 | N.A. | 0 |
| RELL2       | 0,006042674 | -0,113751026 | 0 | N.A. | 0 |
| POLG        | 0,006016644 | 0,251869177  | 0 | N.A. | 0 |
| RP11-528A4. | 0,00599948  | 0,176566722  | 0 | N.A. | 0 |
| RP11-195F19 | 0,005994624 | -0,153555235 | 0 | N.A. | 0 |
| ZBED5       | 0,005961686 | 0,069194177  | 0 | N.A. | 0 |
| SS18L1      | 0,005933872 | 0,022735128  | 0 | N.A. | 0 |
| IGLV3-1     | 0,005915702 | -0,151516345 | 0 | N.A. | 0 |
| TUBB4A      | 0,005892298 | -0,068856584 | 0 | N.A. | 0 |
| TMEM253     | 0,005859817 | 0,262941072  | 0 | N.A. | 0 |
| AC003956.1  | 0,005843978 | 0,182120548  | 0 | N.A. | 0 |
| WDR60       | 0,005841765 | 0,504408436  | 0 | N.A. | 0 |
| SLC35G5     | 0,00583793  | 0,046906907  | 0 | N.A. | 0 |
| USF1        | 0,005831608 | -0,023695807 | 0 | N.A. | 0 |
| BOLL        | 0,005826463 |              | 0 | N.A. | 0 |
| AC011513.4  | 0,005820343 | 0,258528713  | 0 | N.A. | 0 |
| ZBTB45      | 0,005809598 | -0,095154164 | 0 | N.A. | 0 |
| RP11-1018N  | 0,005800222 |              | 0 | N.A. | 0 |

|              |             |              |   |      |   |
|--------------|-------------|--------------|---|------|---|
| RP11-295M3   | 0,005778527 | 0,085646688  | 0 | N.A. | 0 |
| RP11-388M2   | 0,005770262 | 0,068441322  | 0 | N.A. | 0 |
| MPST         | 0,005769023 | 0,042989139  | 0 | N.A. | 0 |
| FCRLA        | 0,00576534  | -0,344267135 | 0 | N.A. | 0 |
| AC092835.2   | 0,005735988 |              | 0 | N.A. | 0 |
| LCMT1-AS1    | 0,00572145  |              | 0 | N.A. | 0 |
| LINC01558    | 0,005698264 | 0,144509535  | 0 | N.A. | 0 |
| SLC28A3      | 0,005686497 | 0,140385789  | 0 | N.A. | 0 |
| ZNF625       | 0,005624978 |              | 0 | N.A. | 0 |
| EXD2         | 0,0056228   | 0,179866634  | 0 | N.A. | 0 |
| TRIM52       | 0,005620914 | 0,087129879  | 0 | N.A. | 0 |
| BBS2         | 0,005618693 | -0,027101231 | 0 | N.A. | 0 |
| LINC01012    | 0,005590537 | -0,072749064 | 0 | N.A. | 0 |
| FBXO24       | 0,00557733  | 0,328314763  | 0 | N.A. | 0 |
| CXCR5        | 0,005555634 | 0,031310603  | 0 | N.A. | 0 |
| RP11-213H15  | 0,005544963 |              | 0 | N.A. | 0 |
| NRF1         | 0,005465061 | -0,065875802 | 0 | N.A. | 0 |
| MS4A6A       | 0,005455721 | -0,235904769 | 0 | N.A. | 0 |
| RP11-575L7.3 | 0,005392077 |              | 0 | N.A. | 0 |
| HLA-DPB1     | 0,00538956  | -0,289030382 | 0 | N.A. | 0 |
| FRS2         | 0,005380075 | 0,285383945  | 0 | N.A. | 0 |
| ZNF549       | 0,005354949 | -0,338316193 | 0 | N.A. | 0 |
| CTD-3126B10  | 0,005349859 |              | 0 | N.A. | 0 |
| LPXN         | 0,005339709 | -0,328901827 | 0 | N.A. | 0 |
| SPDYE1       | 0,005302568 |              | 0 | N.A. | 0 |
| CD163        | 0,005263568 | 0,036040585  | 0 | N.A. | 0 |
| MORN4        | 0,005247813 | 0,333147481  | 0 | N.A. | 0 |
| TCP10L2      | 0,005203802 | -0,135219761 | 0 | N.A. | 0 |
| RP11-1391J7  | 0,005200983 | 0,021205342  | 0 | N.A. | 0 |
| CCDC126      | 0,00519505  | -0,03214097  | 0 | N.A. | 0 |
| GAS1         | 0,005171267 | -0,086200802 | 0 | N.A. | 0 |
| RP11-373D23  | 0,005170477 | 0,211707031  | 0 | N.A. | 0 |
| EPM2AIP1     | 0,005145873 | -0,128841344 | 0 | N.A. | 0 |

|             |             |              |   |      |   |
|-------------|-------------|--------------|---|------|---|
| RP11-314A20 | 0,005122658 | -0,306535125 | 0 | N.A. | 0 |
| CHST13      | 0,005072623 | -0,037703948 | 0 | N.A. | 0 |
| TAP2        | 0,005061533 | 0,227367085  | 0 | N.A. | 0 |
| RP11-213G2  | 0,005054746 | 0,171701687  | 0 | N.A. | 0 |
| KANK3       | 0,00502491  |              | 0 | N.A. | 0 |
| SPRY3       | 0,00501511  | -0,055489061 | 0 | N.A. | 0 |
| RP11-11490  | 0,004987994 | -0,128208862 | 0 | N.A. | 0 |
| SPATA9      | 0,004971959 |              | 0 | N.A. | 0 |
| PHKA1       | 0,004968061 | 0,023073625  | 0 | N.A. | 0 |
| LA16c-390H2 | 0,004960868 | -0,133325802 | 0 | N.A. | 0 |
| GIGYF1      | 0,004917623 | 0,150902374  | 0 | N.A. | 0 |
| TBC1D10C    | 0,004831121 | -0,223461233 | 0 | N.A. | 0 |
| RP11-53I6.3 | 0,004739574 | 0,360961433  | 0 | N.A. | 0 |
| TMEM99      | 0,004720789 | -0,14325946  | 0 | N.A. | 0 |
| PIK3R3      | 0,004710108 | 0,031024648  | 0 | N.A. | 0 |
| CTB-58E17.5 | 0,004694367 | 0,153967938  | 0 | N.A. | 0 |
| AKAP2       | 0,004643777 | 0,253991034  | 0 | N.A. | 0 |
| SPARC       | 0,004593037 | -0,173135807 | 0 | N.A. | 0 |
| BBX         | 0,004577543 | -0,013882739 | 0 | N.A. | 0 |
| GPR161      | 0,004498233 | -0,062068426 | 0 | N.A. | 0 |
| WEE1        | 0,004493898 | 0,099239088  | 0 | N.A. | 0 |
| MICB        | 0,004464225 | 0,098767997  | 0 | N.A. | 0 |
| RP13-554M1  | 0,004393657 | 0,371611845  | 0 | N.A. | 0 |
| TIPARP-AS1  | 0,004386357 | -0,021409995 | 0 | N.A. | 0 |
| RP11-977G19 | 0,004379875 | -0,000419396 | 0 | N.A. | 0 |
| RP11-165E7. | 0,004348581 | 0,024309003  | 0 | N.A. | 0 |
| LINC01272   | 0,004348112 | -0,257712527 | 0 | N.A. | 0 |
| CTD-233602  | 0,004313855 | 0,199814752  | 0 | N.A. | 0 |
| PRKX        | 0,004278441 | -0,012852237 | 0 | N.A. | 0 |
| AC108488.4  | 0,004241347 | 0,082795885  | 0 | N.A. | 0 |
| STKLD1      | 0,004204032 | 0,20128348   | 0 | N.A. | 0 |
| EPB41L4A-AS | 0,004185617 | -0,1009596   | 0 | N.A. | 0 |
| TRGC1       | 0,004060796 |              | 0 | N.A. | 0 |

|             |             |              |   |      |   |
|-------------|-------------|--------------|---|------|---|
| GNLY        | 0,004053536 | -0,140150798 | 0 | N.A. | 0 |
| ZNF763      | 0,004042334 | 0,175889801  | 0 | N.A. | 0 |
| USF2        | 0,004038964 | 0,314850413  | 0 | N.A. | 0 |
| RP11-143E21 | 0,00397764  | 0,264192172  | 0 | N.A. | 0 |
| FGB         | 0,003966215 | -0,013244507 | 0 | N.A. | 0 |
| RP11-6I2.3  | 0,003960372 |              | 0 | N.A. | 0 |
| MAP3K5      | 0,00390856  | 0,074959058  | 0 | N.A. | 0 |
| ZNF285      | 0,003908276 |              | 0 | N.A. | 0 |
| RP3-402G11. | 0,00380383  | 0,150238573  | 0 | N.A. | 0 |
| DGCR14      | 0,003787947 | 0,11981248   | 0 | N.A. | 0 |
| ICAM5       | 0,003776036 | 0,129601357  | 0 | N.A. | 0 |
| LINC01579   | 0,003748611 | -0,101633528 | 0 | N.A. | 0 |
| DNAJC9-AS1  | 0,003728864 | -0,239634558 | 0 | N.A. | 0 |
| MAGEE1      | 0,003718933 |              | 0 | N.A. | 0 |
| LINC00907   | 0,003718843 |              | 0 | N.A. | 0 |
| RP11-253M7  | 0,003710046 |              | 0 | N.A. | 0 |
| RP11-158H5. | 0,003697088 | -0,261509598 | 0 | N.A. | 0 |
| ITGB1BP2    | 0,003694426 | -0,078166364 | 0 | N.A. | 0 |
| NUTM2B-AS1  | 0,003651364 | 0,231649454  | 0 | N.A. | 0 |
| DOC2A       | 0,003643877 | 0,097707393  | 0 | N.A. | 0 |
| CTD-2349P21 | 0,003612965 |              | 0 | N.A. | 0 |
| PC          | 0,003606625 | 0,07244716   | 0 | N.A. | 0 |
| PPM1H       | 0,003603322 | -0,20070649  | 0 | N.A. | 0 |
| PPP5D1      | 0,003591071 | 0,029994093  | 0 | N.A. | 0 |
| FERMT3      | 0,003534409 | -0,183298168 | 0 | N.A. | 0 |
| SH2D1A      | 0,003507208 | -0,273498348 | 0 | N.A. | 0 |
| ZNF510      | 0,003503376 | -0,372582147 | 0 | N.A. | 0 |
| SCN4A       | 0,003477434 |              | 0 | N.A. | 0 |
| ZNF429      | 0,003469535 | -0,190325736 | 0 | N.A. | 0 |
| TSPAN4      | 0,003452209 | -0,295126367 | 0 | N.A. | 0 |
| ACOT9       | 0,003443792 | 0,275252461  | 0 | N.A. | 0 |
| DPEP2       | 0,003425977 |              | 0 | N.A. | 0 |
| DPY19L3     | 0,003403253 | -0,091429925 | 0 | N.A. | 0 |

|             |             |              |   |      |   |
|-------------|-------------|--------------|---|------|---|
| ZNF610      | 0,003398437 | -0,143229782 | 0 | N.A. | 0 |
| ZNF75A      | 0,003345588 | -0,248813864 | 0 | N.A. | 0 |
| TLL4        | 0,003345579 | 0,250058292  | 0 | N.A. | 0 |
| MFSD2B      | 0,003304088 | -0,080918458 | 0 | N.A. | 0 |
| MOGS        | 0,003251999 | 0,249884603  | 0 | N.A. | 0 |
| FCAMR       | 0,003246702 |              | 0 | N.A. | 0 |
| PRICKLE2    | 0,00323105  | 0,061237235  | 0 | N.A. | 0 |
| AR          | 0,003195736 |              | 0 | N.A. | 0 |
| APITD1-COR  | 0,003190822 | -0,284650984 | 0 | N.A. | 0 |
| CHST15      | 0,00317554  | -0,070935261 | 0 | N.A. | 0 |
| RP11-624L4  | 0,003171552 | -0,022192046 | 0 | N.A. | 0 |
| JARID2-AS1  | 0,003103718 | -0,225884463 | 0 | N.A. | 0 |
| KCNIP2      | 0,003101712 | -0,094451458 | 0 | N.A. | 0 |
| MFSD8       | 0,003095719 | 0,101064904  | 0 | N.A. | 0 |
| PPAPDC2     | 0,00309053  | 0,071561487  | 0 | N.A. | 0 |
| NUDCD3      | 0,003029906 | 0,229499742  | 0 | N.A. | 0 |
| TSPAN33     | 0,003022142 | 0,267784604  | 0 | N.A. | 0 |
| ZNF547      | 0,003008948 | 0,34603388   | 0 | N.A. | 0 |
| RFK         | 0,002994017 | 0,160986054  | 0 | N.A. | 0 |
| FAM225B     | 0,002924933 | 0,19026848   | 0 | N.A. | 0 |
| RP11-351J23 | 0,002903055 | 0,376015322  | 0 | N.A. | 0 |
| NOX4        | 0,002811591 | -0,04093386  | 0 | N.A. | 0 |
| DHTKD1      | 0,002801473 | 0,110428259  | 0 | N.A. | 0 |
| RASGRP2     | 0,002780291 | -0,049160732 | 0 | N.A. | 0 |
| RSPRY1      | 0,002765441 | 0,186066652  | 0 | N.A. | 0 |
| FRY         | 0,002740196 | -0,060541364 | 0 | N.A. | 0 |
| RP11-1082L8 | 0,00273347  |              | 0 | N.A. | 0 |
| LINC00379   | 0,002726317 |              | 0 | N.A. | 0 |
| LINC01508   | 0,002711309 | 0,051521097  | 0 | N.A. | 0 |
| RP11-101E13 | 0,002703249 | -0,066043289 | 0 | N.A. | 0 |
| CASKIN1     | 0,0026991   | -0,06324418  | 0 | N.A. | 0 |
| TMEM185B    | 0,002692847 | 0,038311516  | 0 | N.A. | 0 |
| ZNF638      | 0,002598649 | 0,016278837  | 0 | N.A. | 0 |

|              |             |              |   |      |   |
|--------------|-------------|--------------|---|------|---|
| HEATR5B      | 0,002587614 | 0,05732514   | 0 | N.A. | 0 |
| CTD-2562J15  | 0,002578846 |              | 0 | N.A. | 0 |
| SIPA1L2      | 0,002536517 | -0,141341453 | 0 | N.A. | 0 |
| SGMS1-AS1    | 0,00245903  | 0,125931419  | 0 | N.A. | 0 |
| HDX          | 0,002439528 | 0,406637574  | 0 | N.A. | 0 |
| GPRC5D       | 0,002436998 | 0,152009444  | 0 | N.A. | 0 |
| CNOT3        | 0,002431754 | 0,072674985  | 0 | N.A. | 0 |
| LAYN         | 0,002425438 | -0,037717878 | 0 | N.A. | 0 |
| KIAA0100     | 0,002424478 | -0,010410518 | 0 | N.A. | 0 |
| RP11-400N9.  | 0,002342979 | -0,036480823 | 0 | N.A. | 0 |
| HTRA4        | 0,002341745 |              | 0 | N.A. | 0 |
| ANKRD34A     | 0,002308773 | -0,040737619 | 0 | N.A. | 0 |
| SAR1B        | 0,002272021 | 0,380344794  | 0 | N.A. | 0 |
| KLK3         | 0,002269399 | 0,022974679  | 0 | N.A. | 0 |
| CH507-9B2.3  | 0,002269227 | -0,040462911 | 0 | N.A. | 0 |
| MPZL1        | 0,002250574 | 0,116424528  | 0 | N.A. | 0 |
| CTC-250I14.3 | 0,002224133 |              | 0 | N.A. | 0 |
| RP11-195L15  | 0,00218783  | 0,125995268  | 0 | N.A. | 0 |
| CTD-2231E14  | 0,002180621 | 0,042900913  | 0 | N.A. | 0 |
| CHADL        | 0,002172459 | -0,033564295 | 0 | N.A. | 0 |
| SLC5A1       | 0,002158019 | 0,210751805  | 0 | N.A. | 0 |
| RP11-83C7.1  | 0,002073775 |              | 0 | N.A. | 0 |
| STPG1        | 0,002034766 | -0,186459693 | 0 | N.A. | 0 |
| LINC01554    | 0,001990467 | 0,038179167  | 0 | N.A. | 0 |
| CASC2        | 0,00197397  | -0,327879764 | 0 | N.A. | 0 |
| TSPAN18      | 0,00193931  | -0,025496438 | 0 | N.A. | 0 |
| MIR143HG     | 0,001929822 | -0,04779246  | 0 | N.A. | 0 |
| SEPT1        | 0,00188915  | -0,073993609 | 0 | N.A. | 0 |
| TSSK3        | 0,001870187 | -0,109524295 | 0 | N.A. | 0 |
| RP11-432I5.2 | 0,00186788  | 0,054697443  | 0 | N.A. | 0 |
| AL133245.2   | 0,00185419  |              | 0 | N.A. | 0 |
| RP11-377D9.  | 0,00182814  | -0,015994341 | 0 | N.A. | 0 |
| ZADH2        | 0,001811672 | 0,000588547  | 0 | N.A. | 0 |

|              |             |              |   |      |   |
|--------------|-------------|--------------|---|------|---|
| DHRS1        | 0,001731587 | 0,110356421  | 0 | N.A. | 0 |
| AGAP4        | 0,001725798 | 0,24607293   | 0 | N.A. | 0 |
| CTA-212A2.4  | 0,001723038 | -0,134998157 | 0 | N.A. | 0 |
| HSDL1        | 0,001719781 | 0,074572981  | 0 | N.A. | 0 |
| RP11-575H3.  | 0,001692477 | 0,055017381  | 0 | N.A. | 0 |
| MTUS2        | 0,001687515 | -0,109552447 | 0 | N.A. | 0 |
| MARCH5       | 0,001656663 | -0,312985475 | 0 | N.A. | 0 |
| LILRB2       | 0,001607317 |              | 0 | N.A. | 0 |
| RP11-514P8.  | 0,001603989 | -0,078970823 | 0 | N.A. | 0 |
| MAP2K1       | 0,001568028 | -0,020159773 | 0 | N.A. | 0 |
| AP003419.16  | 0,001541107 | -0,001487935 | 0 | N.A. | 0 |
| TIGD7        | 0,001540259 | -0,324960897 | 0 | N.A. | 0 |
| RP11-467C18  | 0,001523878 |              | 0 | N.A. | 0 |
| EFNA4        | 0,001506799 | 0,227813777  | 0 | N.A. | 0 |
| RP1-80N2.3   | 0,001478779 | -0,044480214 | 0 | N.A. | 0 |
| PIK3R2       | 0,001476183 | -0,093322999 | 0 | N.A. | 0 |
| RP11-258F1.  | 0,001436367 | 0,044112527  | 0 | N.A. | 0 |
| NYAP1        | 0,001432633 | 0,2595287    | 0 | N.A. | 0 |
| LINC01353    | 0,001427856 | 0,029078615  | 0 | N.A. | 0 |
| RP11-435J9.2 | 0,001425347 |              | 0 | N.A. | 0 |
| COLEC11      | 0,001418365 | -0,314671989 | 0 | N.A. | 0 |
| CTB-113I20.2 | 0,001412588 | -0,158227899 | 0 | N.A. | 0 |
| RGS4         | 0,001388947 |              | 0 | N.A. | 0 |
| RP11-823E8.  | 0,001368753 |              | 0 | N.A. | 0 |
| ADARB1       | 0,001301031 | -0,006349643 | 0 | N.A. | 0 |
| OBP2B        | 0,001294242 |              | 0 | N.A. | 0 |
| NKD2         | 0,001244678 | -0,068972074 | 0 | N.A. | 0 |
| ZNF839       | 0,001234381 | -0,043249664 | 0 | N.A. | 0 |
| SLC9A3       | 0,001197248 |              | 0 | N.A. | 0 |
| RAD21-AS1    | 0,001178563 | -0,089026479 | 0 | N.A. | 0 |
| AGPAT1       | 0,001173443 | -0,244561255 | 0 | N.A. | 0 |
| NXPE1        | 0,001157224 | -0,069933483 | 0 | N.A. | 0 |
| PRR26        | 0,001152009 | -0,197205517 | 0 | N.A. | 0 |

|              |             |              |   |      |   |
|--------------|-------------|--------------|---|------|---|
| SLC38A1      | 0,00112001  | 0,07036791   | 0 | N.A. | 0 |
| RP11-29H23.  | 0,001115725 | -0,213918434 | 0 | N.A. | 0 |
| SRRM3        | 0,001081051 | 0,487939231  | 0 | N.A. | 0 |
| RP11-616M2   | 0,001033315 | 0,404457809  | 0 | N.A. | 0 |
| DNAJC28      | 0,001008828 | 0,294466495  | 0 | N.A. | 0 |
| RASSF2       | 0,000997187 | -0,164192624 | 0 | N.A. | 0 |
| PTPRG        | 0,000966533 | 0,05079868   | 0 | N.A. | 0 |
| KLLN         | 0,000928846 | -0,090888159 | 0 | N.A. | 0 |
| RP11-350N15  | 0,000918695 | 0,076226398  | 0 | N.A. | 0 |
| CDC73        | 0,000916074 | 0,470251908  | 0 | N.A. | 0 |
| MED1         | 0,000884477 | 0,08036883   | 0 | N.A. | 0 |
| BFSP1        | 0,0008716   | 0,284681288  | 0 | N.A. | 0 |
| LDHC         | 0,000856587 | -0,420094802 | 0 | N.A. | 0 |
| C2orf50      | 0,000844259 | -0,085713322 | 0 | N.A. | 0 |
| C14orf159    | 0,000836887 | -0,113098712 | 0 | N.A. | 0 |
| TRAK2        | 0,000830186 | 0,208706764  | 0 | N.A. | 0 |
| MIF-AS1      | 0,000807731 | -0,19388195  | 0 | N.A. | 0 |
| HOXC5        | 0,000789237 | 0,128533111  | 0 | N.A. | 0 |
| RP11-273G15  | 0,000777213 |              | 0 | N.A. | 0 |
| CALM2        | 0,000753471 | 0,012538765  | 0 | N.A. | 0 |
| LCLAT1       | 0,000737942 | -0,027172525 | 0 | N.A. | 0 |
| GAS8         | 0,000735143 | 0,016790504  | 0 | N.A. | 0 |
| HYDIN        | 0,000726372 | -0,270187    | 0 | N.A. | 0 |
| HES2         | 0,000722535 | 0,060864651  | 0 | N.A. | 0 |
| CTD-2026K11  | 0,000711271 |              | 0 | N.A. | 0 |
| RP11-488L18  | 0,000697424 | 0,010531615  | 0 | N.A. | 0 |
| ZDHHC8       | 0,000693215 | 0,179969931  | 0 | N.A. | 0 |
| RP11-73M18   | 0,000672172 | -0,149130166 | 0 | N.A. | 0 |
| RP13-20L14.6 | 0,000620361 | -0,10579413  | 0 | N.A. | 0 |
| RP11-497H16  | 0,000600977 | -0,002081159 | 0 | N.A. | 0 |
| KBTBD8       | 0,000575125 | -0,201179426 | 0 | N.A. | 0 |
| IGSF22       | 0,000555108 | -0,227136239 | 0 | N.A. | 0 |
| FAM167A      | 0,000459048 | -0,082520373 | 0 | N.A. | 0 |



|             |              |              |   |      |   |
|-------------|--------------|--------------|---|------|---|
| IGKV1-39    | 0,000396291  | -0,102583013 | 0 | N.A. | 0 |
| RP11-818O24 | 0,000322593  |              | 0 | N.A. | 0 |
| FAM168B     | 0,000313224  | 0,137320137  | 0 | N.A. | 0 |
| RP11-118K6. | 0,000266728  | 0,192266869  | 0 | N.A. | 0 |
| TMTC1       | 0,000239849  |              | 0 | N.A. | 0 |
| RP11-196G11 | 0,000228244  | -0,114466462 | 0 | N.A. | 0 |
| RP11-473M2  | 0,000215724  |              | 0 | N.A. | 0 |
| ASB1        | 0,000198562  | -0,025148805 | 0 | N.A. | 0 |
| FAM20B      | 0,000176894  | 0,119392836  | 0 | N.A. | 0 |
| DENND6A     | 0,000117635  | -0,163273559 | 0 | N.A. | 0 |
| SRGN        | 0,000112492  | -0,233222827 | 0 | N.A. | 0 |
| SIAH1       | 0,00010757   | 0,391683744  | 0 | N.A. | 0 |
| ZNF608      | 0,000105183  | -0,095780847 | 0 | N.A. | 0 |
| RP11-367G6. | 9,93893E-05  | -0,088758096 | 0 | N.A. | 0 |
| SLC7A6      | 9,86744E-05  | 0,319447272  | 0 | N.A. | 0 |
| RP11-505P4. | 9,57138E-05  |              | 0 | N.A. | 0 |
| APLN        | 7,49573E-05  | 0,246445651  | 0 | N.A. | 0 |
| TMEM91      | 6,10941E-05  | -0,129042387 | 0 | N.A. | 0 |
| CEACAM19    | 6,07599E-05  | -0,14715335  | 0 | N.A. | 0 |
| LINC00942   | 3,9778E-05   | 0,05472756   | 0 | N.A. | 0 |
| ZNF823      | -1,18282E-05 | -0,093802578 | 0 | N.A. | 0 |
| LEFTY2      | -1,27631E-05 | -0,076351601 | 0 | N.A. | 0 |
| PPP1R42     | -4,13001E-05 |              | 0 | N.A. | 0 |
| RBBP8       | -4,84071E-05 | -0,018495689 | 0 | N.A. | 0 |
| EMILIN1     | -6,48376E-05 | 0,364320607  | 0 | N.A. | 0 |
| IGKV2-24    | -7,16739E-05 |              | 0 | N.A. | 0 |
| RP1-292L20. | -0,000125522 | 0,105659761  | 0 | N.A. | 0 |
| PAK1        | -0,000135019 | 0,19775324   | 0 | N.A. | 0 |
| RP11-540K16 | -0,00014929  |              | 0 | N.A. | 0 |
| AC019186.1  | -0,00020136  | 0,115877089  | 0 | N.A. | 0 |
| CDC37L1-AS1 | -0,000207821 | -0,156322784 | 0 | N.A. | 0 |
| RP11-862L9. | -0,000213991 |              | 0 | N.A. | 0 |
| MED17       | -0,000219569 | 0,08856868   | 0 | N.A. | 0 |

|             |              |              |   |      |   |
|-------------|--------------|--------------|---|------|---|
| RP4-621N11. | -0,000232981 | 0,107125664  | 0 | N.A. | 0 |
| BRINP2      | -0,000236368 | 0,14117977   | 0 | N.A. | 0 |
| OXTR        | -0,000267719 | -0,032485965 | 0 | N.A. | 0 |
| RYR2        | -0,00028113  | -0,077078527 | 0 | N.A. | 0 |
| PKDCC       | -0,000285059 | 0,197974545  | 0 | N.A. | 0 |
| IL10RA      | -0,000407829 | -0,349158047 | 0 | N.A. | 0 |
| NOVA1       | -0,000421355 |              | 0 | N.A. | 0 |
| ZBTB14      | -0,000443069 | 0,086900272  | 0 | N.A. | 0 |
| CITED1      | -0,000455359 | 0,129947062  | 0 | N.A. | 0 |
| ANKS1B      | -0,000465931 |              | 0 | N.A. | 0 |
| KLHL22      | -0,000482164 | -0,001049344 | 0 | N.A. | 0 |
| KIF1A       | -0,000488677 |              | 0 | N.A. | 0 |
| EFHB        | -0,000494049 | -0,001523976 | 0 | N.A. | 0 |
| GALT        | -0,000507957 | -0,100397897 | 0 | N.A. | 0 |
| CTC-490G23. | -0,000583652 | -0,150208323 | 0 | N.A. | 0 |
| PRKCB       | -0,000642745 | -0,138899593 | 0 | N.A. | 0 |
| C1orf162    | -0,000667075 | -0,049253213 | 0 | N.A. | 0 |
| SLC23A2     | -0,000674981 | 0,143172793  | 0 | N.A. | 0 |
| ZNF33A      | -0,000685175 | -0,083414601 | 0 | N.A. | 0 |
| SLC35A2     | -0,000690407 | 0,29328723   | 0 | N.A. | 0 |
| IGLV2-14    | -0,000721391 | -0,199421529 | 0 | N.A. | 0 |
| RP11-425A6. | -0,000723251 |              | 0 | N.A. | 0 |
| ZNF672      | -0,000725812 | -0,148908908 | 0 | N.A. | 0 |
| SLC2A11     | -0,00072629  | -0,086101041 | 0 | N.A. | 0 |
| LINC00518   | -0,000744129 | 0,253107376  | 0 | N.A. | 0 |
| EMCN        | -0,00076009  | -0,026564488 | 0 | N.A. | 0 |
| CELA3A      | -0,000777627 | 0,270033864  | 0 | N.A. | 0 |
| ARNT2       | -0,000790779 | 0,008947265  | 0 | N.A. | 0 |
| CACNA1E     | -0,000827268 |              | 0 | N.A. | 0 |
| AP000344.3  | -0,0008285   | -0,174765926 | 0 | N.A. | 0 |
| LINC00982   | -0,000840059 |              | 0 | N.A. | 0 |
| TRPM5       | -0,000847412 | -0,040087865 | 0 | N.A. | 0 |
| HIST1H3A    | -0,000863342 | -0,265803453 | 0 | N.A. | 0 |

|              |              |              |   |      |   |
|--------------|--------------|--------------|---|------|---|
| RP11-727A23  | -0,000901965 | 0,160492765  | 0 | N.A. | 0 |
| ANKRD65      | -0,00095859  | -0,245514616 | 0 | N.A. | 0 |
| HIST1H2AI    | -0,000965092 | 0,01461122   | 0 | N.A. | 0 |
| RP11-500G22  | -0,000978012 |              | 0 | N.A. | 0 |
| RP11-297P16  | -0,000982686 | 0,185361819  | 0 | N.A. | 0 |
| RP3-467N11   | -0,001005566 | -0,073813227 | 0 | N.A. | 0 |
| AZIN2        | -0,001063722 | 0,005408607  | 0 | N.A. | 0 |
| TRPV4        | -0,001073034 | -0,307490807 | 0 | N.A. | 0 |
| RP11-357H14  | -0,00110483  | 0,274977046  | 0 | N.A. | 0 |
| RDH11        | -0,001134149 | 0,261140752  | 0 | N.A. | 0 |
| RP11-85L21.4 | -0,001144722 |              | 0 | N.A. | 0 |
| LINC00539    | -0,001167292 | -0,348839689 | 0 | N.A. | 0 |
| RP11-44N11   | -0,00118973  | -0,113623148 | 0 | N.A. | 0 |
| GJB6         | -0,001215846 | 0,019455818  | 0 | N.A. | 0 |
| CARD8-AS1    | -0,001288898 | 0,091832706  | 0 | N.A. | 0 |
| CCDC114      | -0,001299867 | 0,171071584  | 0 | N.A. | 0 |
| RP11-849H4   | -0,00133476  | -0,307430028 | 0 | N.A. | 0 |
| RP11-16P6.1  | -0,001335214 | 0,19751104   | 0 | N.A. | 0 |
| CTA-14H9.5   | -0,001335988 | 0,070976508  | 0 | N.A. | 0 |
| UBE3C        | -0,001364711 | 0,349757353  | 0 | N.A. | 0 |
| RP11-15001   | -0,001364715 | -0,056315218 | 0 | N.A. | 0 |
| CTD-2270L9   | -0,001375499 | -0,140455172 | 0 | N.A. | 0 |
| VHL          | -0,001384913 | -0,143153679 | 0 | N.A. | 0 |
| AP000230.1   | -0,001433405 |              | 0 | N.A. | 0 |
| RP11-362K14  | -0,001491079 | -0,056878355 | 0 | N.A. | 0 |
| CTD-2302E22  | -0,001496235 | -0,013016838 | 0 | N.A. | 0 |
| EBF4         | -0,001525371 | 0,201976515  | 0 | N.A. | 0 |
| ZNF268       | -0,001534001 | -0,000418775 | 0 | N.A. | 0 |
| STAG1        | -0,001548919 | -0,079629171 | 0 | N.A. | 0 |
| U73166.2     | -0,001562007 | 0,44192734   | 0 | N.A. | 0 |
| NTN5         | -0,001609926 | 0,050110687  | 0 | N.A. | 0 |
| ACTA2        | -0,001630833 | -0,191074124 | 0 | N.A. | 0 |
| SLC13A2      | -0,001638989 | 0,154265089  | 0 | N.A. | 0 |

|              |              |              |   |      |   |
|--------------|--------------|--------------|---|------|---|
| AC108868.6   | -0,001658009 | 0,061598112  | 0 | N.A. | 0 |
| DNAJC12      | -0,001687548 | -0,050749619 | 0 | N.A. | 0 |
| GRASP        | -0,001718175 | -0,269354945 | 0 | N.A. | 0 |
| TMEM104      | -0,001737535 | 0,245341076  | 0 | N.A. | 0 |
| GDF11        | -0,001737617 | 0,030832664  | 0 | N.A. | 0 |
| GUCY1A3      | -0,001754108 |              | 0 | N.A. | 0 |
| FYN          | -0,00176843  | 0,103350423  | 0 | N.A. | 0 |
| PDXDC1       | -0,001807479 | 0,385874646  | 0 | N.A. | 0 |
| NCOR1        | -0,001886311 | 0,290208771  | 0 | N.A. | 0 |
| ZFAND2A      | -0,001926552 | 0,421680573  | 0 | N.A. | 0 |
| FGFR3        | -0,001947256 | 0,167975818  | 0 | N.A. | 0 |
| RP11-110I1.1 | -0,001948819 | -0,031994112 | 0 | N.A. | 0 |
| EFCAB8       | -0,001991606 |              | 0 | N.A. | 0 |
| AASS         | -0,002013216 | -0,12237008  | 0 | N.A. | 0 |
| RP1-202O8.3  | -0,002068411 | 0,055927098  | 0 | N.A. | 0 |
| ZNF575       | -0,002108556 | 0,00434307   | 0 | N.A. | 0 |
| PLA2G1B      | -0,002116661 | -0,058220557 | 0 | N.A. | 0 |
| PNPLA3       | -0,002117823 | 0,123895513  | 0 | N.A. | 0 |
| CTA-384D8.3  | -0,002124348 | -0,069028052 | 0 | N.A. | 0 |
| FERMT2       | -0,002134641 | -0,171581455 | 0 | N.A. | 0 |
| RASGRF2      | -0,002188659 | 0,333969289  | 0 | N.A. | 0 |
| SASH1        | -0,002214377 | -0,011885974 | 0 | N.A. | 0 |
| LINC00330    | -0,002224281 | -0,03613409  | 0 | N.A. | 0 |
| CASP8        | -0,002230129 | 0,088896994  | 0 | N.A. | 0 |
| NKX2-5       | -0,002256852 |              | 0 | N.A. | 0 |
| ATP6VOA2     | -0,002270096 | 0,259472008  | 0 | N.A. | 0 |
| ARL11        | -0,002275525 | -0,100946746 | 0 | N.A. | 0 |
| RP11-471M2   | -0,002315766 | 0,071982769  | 0 | N.A. | 0 |
| ZBTB49       | -0,00234106  | 0,170391142  | 0 | N.A. | 0 |
| SYN2         | -0,002384488 |              | 0 | N.A. | 0 |
| CSRP1        | -0,002440147 | -0,182817673 | 0 | N.A. | 0 |
| RP11-164H13  | -0,00244114  |              | 0 | N.A. | 0 |
| FUK          | -0,002445519 | -0,08740401  | 0 | N.A. | 0 |

|             |              |              |   |      |   |
|-------------|--------------|--------------|---|------|---|
| RP11-443B7. | -0,002460653 | 0,072565575  | 0 | N.A. | 0 |
| PILRB       | -0,002539244 | 0,08731291   | 0 | N.A. | 0 |
| RP5-1112D6. | -0,002567588 | 0,113225045  | 0 | N.A. | 0 |
| SDE2        | -0,002593247 | 0,24811854   | 0 | N.A. | 0 |
| MATN4       | -0,002602389 | 0,014816338  | 0 | N.A. | 0 |
| COL11A2     | -0,002604702 | 0,07148131   | 0 | N.A. | 0 |
| AC113189.5  | -0,002610945 | 0,03712464   | 0 | N.A. | 0 |
| ST6GALNAC3  | -0,002611368 |              | 0 | N.A. | 0 |
| PLD4        | -0,002628623 |              | 0 | N.A. | 0 |
| PDE11A      | -0,002637046 | -0,098018139 | 0 | N.A. | 0 |
| AKAP8L      | -0,002666373 | -0,099198852 | 0 | N.A. | 0 |
| TTN         | -0,002680346 | 0,008412637  | 0 | N.A. | 0 |
| GLB1L       | -0,002707008 | 0,082214765  | 0 | N.A. | 0 |
| COL1A1      | -0,002711534 | -0,0475467   | 0 | N.A. | 0 |
| FAM155B     | -0,002739973 |              | 0 | N.A. | 0 |
| AC131097.4  | -0,002741081 |              | 0 | N.A. | 0 |
| RP1-92O14.3 | -0,002764043 | 0,115039497  | 0 | N.A. | 0 |
| FGF19       | -0,002766895 | 0,24318832   | 0 | N.A. | 0 |
| AC091814.2  | -0,00276971  |              | 0 | N.A. | 0 |
| UXS1        | -0,002778632 | 0,285131134  | 0 | N.A. | 0 |
| GDF15       | -0,002804339 | 0,351009069  | 0 | N.A. | 0 |
| CRYGS       | -0,002823626 | 0,016399497  | 0 | N.A. | 0 |
| CTD-2650P22 | -0,002830746 |              | 0 | N.A. | 0 |
| LRRC48      | -0,002867729 | 0,050243583  | 0 | N.A. | 0 |
| RP11-474O21 | -0,002875539 | -0,291562418 | 0 | N.A. | 0 |
| CLEC2B      | -0,002876586 | 0,081369784  | 0 | N.A. | 0 |
| OSER1       | -0,002883606 | -0,087005655 | 0 | N.A. | 0 |
| GGTLC3      | -0,002887321 |              | 0 | N.A. | 0 |
| CTD-2007H11 | -0,002894494 | -0,144327239 | 0 | N.A. | 0 |
| AC005954.4  | -0,00291938  | 0,042551129  | 0 | N.A. | 0 |
| TMEM64      | -0,002934432 | -0,002279519 | 0 | N.A. | 0 |
| TTLL10      | -0,002944437 | 0,025681908  | 0 | N.A. | 0 |
| RP11-219B17 | -0,00296015  |              | 0 | N.A. | 0 |

|             |              |              |   |      |   |
|-------------|--------------|--------------|---|------|---|
| LIPJ        | -0,002965884 |              | 0 | N.A. | 0 |
| SEC61G      | -0,003002582 | -0,22147065  | 0 | N.A. | 0 |
| AP1B1       | -0,003012221 | 0,09038991   | 0 | N.A. | 0 |
| ST20-AS1    | -0,003020829 | -0,041673645 | 0 | N.A. | 0 |
| BMP7        | -0,003029546 | 0,27762239   | 0 | N.A. | 0 |
| TRAM1L1     | -0,003031833 | -0,09000857  | 0 | N.A. | 0 |
| GATA6-AS1   | -0,003068309 | -0,0903477   | 0 | N.A. | 0 |
| MTPN        | -0,00307007  | 0,01799233   | 0 | N.A. | 0 |
| HSD11B2     | -0,003070502 | 0,145918974  | 0 | N.A. | 0 |
| BCL2        | -0,003070618 | -0,260082404 | 0 | N.A. | 0 |
| LINC01003   | -0,003113282 | 0,22072602   | 0 | N.A. | 0 |
| RP11-135L13 | -0,003166081 | 0,034658328  | 0 | N.A. | 0 |
| LINC01152   | -0,003244698 | 0,086571502  | 0 | N.A. | 0 |
| RP11-534C12 | -0,003276921 |              | 0 | N.A. | 0 |
| TARSL2      | -0,003299803 | 0,262977383  | 0 | N.A. | 0 |
| FEM1A       | -0,003353498 | 0,293869269  | 0 | N.A. | 0 |
| HIST1H2BB   | -0,00338003  | -0,219575576 | 0 | N.A. | 0 |
| RRS1-AS1    | -0,003409194 |              | 0 | N.A. | 0 |
| RP5-1068E13 | -0,003424729 | 0,190665358  | 0 | N.A. | 0 |
| RP4-756G23  | -0,003430445 |              | 0 | N.A. | 0 |
| MS4A1       | -0,003496297 | -0,180666953 | 0 | N.A. | 0 |
| RAB3C       | -0,003521902 |              | 0 | N.A. | 0 |
| GDAP1       | -0,003555575 | -0,175345557 | 0 | N.A. | 0 |
| ERICH1      | -0,003559633 | 0,313429373  | 0 | N.A. | 0 |
| COPB1       | -0,003637523 | 0,291079995  | 0 | N.A. | 0 |
| GIMAP2      | -0,003637567 | -0,214244257 | 0 | N.A. | 0 |
| WBP4        | -0,003669645 | 0,295368124  | 0 | N.A. | 0 |
| CACNB2      | -0,003716888 | -0,316215629 | 0 | N.A. | 0 |
| RP11-783K16 | -0,003718466 | 0,210110781  | 0 | N.A. | 0 |
| ZNF136      | -0,003755125 | 0,117116214  | 0 | N.A. | 0 |
| CTB-75G16.3 | -0,003771122 |              | 0 | N.A. | 0 |
| AC005355.2  | -0,003778064 | -0,248966268 | 0 | N.A. | 0 |
| FBXL22      | -0,003833921 | -0,073756802 | 0 | N.A. | 0 |

|              |              |              |   |      |   |
|--------------|--------------|--------------|---|------|---|
| DYRK3        | -0,003906957 | 0,026802236  | 0 | N.A. | 0 |
| MSMP         | -0,003917975 |              | 0 | N.A. | 0 |
| IGKV2D-24    | -0,003930151 |              | 0 | N.A. | 0 |
| SYNGAP1      | -0,003947014 | 0,14741977   | 0 | N.A. | 0 |
| DYRK1B       | -0,003998949 | 0,037387235  | 0 | N.A. | 0 |
| TMEM240      | -0,00408853  | 0,331466477  | 0 | N.A. | 0 |
| CTA-221G9.7  | -0,004109488 | 0,255234424  | 0 | N.A. | 0 |
| SUMF1        | -0,004122922 | -0,097789621 | 0 | N.A. | 0 |
| CTD-3222D1   | -0,004137326 | 0,080417911  | 0 | N.A. | 0 |
| RP11-615I2.6 | -0,0041481   |              | 0 | N.A. | 0 |
| EFCAB12      | -0,004202309 | -0,004337111 | 0 | N.A. | 0 |
| DLGAP2       | -0,004206771 |              | 0 | N.A. | 0 |
| GLUD1        | -0,004249489 | 0,17464499   | 0 | N.A. | 0 |
| ZNF506       | -0,004259924 | -0,020651486 | 0 | N.A. | 0 |
| ARMC4        | -0,004302979 |              | 0 | N.A. | 0 |
| RP1-86C11.7  | -0,004306514 |              | 0 | N.A. | 0 |
| RP3-406P24.  | -0,004342538 |              | 0 | N.A. | 0 |
| AC022007.5   | -0,004354628 | 0,106502794  | 0 | N.A. | 0 |
| RP11-67L3.4  | -0,0043964   | -0,009403856 | 0 | N.A. | 0 |
| LINC00523    | -0,004422758 | 0,310615491  | 0 | N.A. | 0 |
| RP11-302F12  | -0,004426572 |              | 0 | N.A. | 0 |
| ZNF585B      | -0,004429297 | 0,091145368  | 0 | N.A. | 0 |
| F7           | -0,004452107 | -0,002953204 | 0 | N.A. | 0 |
| LINC00545    | -0,004456956 | -0,021263805 | 0 | N.A. | 0 |
| SEMA6B       | -0,004469817 | 0,15477685   | 0 | N.A. | 0 |
| PRDM4        | -0,004520897 | -0,052889352 | 0 | N.A. | 0 |
| CTD-2619J13  | -0,004526957 | -0,049338628 | 0 | N.A. | 0 |
| RP11-2E11.9  | -0,004531828 | 0,144270463  | 0 | N.A. | 0 |
| TSNAX-DISC1  | -0,004563645 | -0,007866093 | 0 | N.A. | 0 |
| RP1-163G9.2  | -0,004609912 |              | 0 | N.A. | 0 |
| CTC-273B12.  | -0,004609924 | 0,116237638  | 0 | N.A. | 0 |
| RP11-611O2.  | -0,004610701 | 0,072565575  | 0 | N.A. | 0 |
| VIM          | -0,004631678 | -0,407737952 | 0 | N.A. | 0 |

|              |              |              |   |      |   |
|--------------|--------------|--------------|---|------|---|
| BMP6         | -0,004634869 |              | 0 | N.A. | 0 |
| ALDH1L2      | -0,004645664 | -0,080839488 | 0 | N.A. | 0 |
| AC093732.1   | -0,004684892 | -0,05262621  | 0 | N.A. | 0 |
| RP11-61E11.  | -0,004749517 |              | 0 | N.A. | 0 |
| RP5-1096D14  | -0,004768304 |              | 0 | N.A. | 0 |
| TNNI3        | -0,00478155  | -0,025783709 | 0 | N.A. | 0 |
| AC005786.7   | -0,004787845 | 0,099005435  | 0 | N.A. | 0 |
| RP11-285F7.  | -0,004808533 | 0,028976771  | 0 | N.A. | 0 |
| NADSYN1      | -0,004876257 | -0,04960793  | 0 | N.A. | 0 |
| RP11-430B1.  | -0,004894913 | 0,202513281  | 0 | N.A. | 0 |
| C9orf91      | -0,004928249 | -0,078732383 | 0 | N.A. | 0 |
| RP11-408H1.  | -0,00493146  | -0,027784039 | 0 | N.A. | 0 |
| RP4-798A10.  | -0,004945466 | 0,323215644  | 0 | N.A. | 0 |
| SEMA3F       | -0,00496652  | 0,150125602  | 0 | N.A. | 0 |
| ICA1         | -0,00499971  | 0,312274725  | 0 | N.A. | 0 |
| RP11-103J8.2 | -0,00504362  | -0,096469944 | 0 | N.A. | 0 |
| BCL2A1       | -0,005072868 | 0,260192494  | 0 | N.A. | 0 |
| LEKR1        | -0,005075121 | 0,051899838  | 0 | N.A. | 0 |
| ZNF276       | -0,005096144 | 0,23206218   | 0 | N.A. | 0 |
| FCRL5        | -0,005119478 |              | 0 | N.A. | 0 |
| TLL5         | -0,005130751 | -0,230614112 | 0 | N.A. | 0 |
| NBPF26       | -0,00513743  | -0,024894597 | 0 | N.A. | 0 |
| CLMP         | -0,005180867 | -0,164379635 | 0 | N.A. | 0 |
| MTRNR2L13    | -0,005233393 |              | 0 | N.A. | 0 |
| LAG3         | -0,005250605 | -0,034171971 | 0 | N.A. | 0 |
| AC145124.2   | -0,005261392 | 0,164968005  | 0 | N.A. | 0 |
| GPR3         | -0,005263499 | 0,080892612  | 0 | N.A. | 0 |
| ETV1         | -0,005312247 | 0,143615319  | 0 | N.A. | 0 |
| ARHGAP26-A   | -0,005317914 | 0,018496156  | 0 | N.A. | 0 |
| GNA14-AS1    | -0,005346205 |              | 0 | N.A. | 0 |
| CXorf40B     | -0,005352932 | -0,19269301  | 0 | N.A. | 0 |
| DIO1         | -0,005368117 |              | 0 | N.A. | 0 |
| S100Z        | -0,005368488 |              | 0 | N.A. | 0 |



|              |              |              |   |      |   |
|--------------|--------------|--------------|---|------|---|
| RP13-580B18  | -0,005382776 | 0,291809992  | 0 | N.A. | 0 |
| CTC-251D13.  | -0,005396622 | 0,165360447  | 0 | N.A. | 0 |
| GTF2A1       | -0,005411595 | 0,133276219  | 0 | N.A. | 0 |
| CTD-2035E11  | -0,00541527  | 0,263876912  | 0 | N.A. | 0 |
| ITGA4        | -0,005495249 | -0,216897317 | 0 | N.A. | 0 |
| AQP3         | -0,005496947 | 0,03482334   | 0 | N.A. | 0 |
| IGHV3-43     | -0,005589551 |              | 0 | N.A. | 0 |
| ZKSCAN1      | -0,005604719 | 0,27488372   | 0 | N.A. | 0 |
| ATG7         | -0,005607076 | -0,06585885  | 0 | N.A. | 0 |
| RP5-1009E24  | -0,00565221  | 0,157882403  | 0 | N.A. | 0 |
| SPRY4-IT1    | -0,005672715 | 0,005876191  | 0 | N.A. | 0 |
| RP11-138I1.2 | -0,005712732 |              | 0 | N.A. | 0 |
| RP4-622L5.7  | -0,005791015 | 0,268280626  | 0 | N.A. | 0 |
| C3AR1        | -0,005803026 | 0,307833848  | 0 | N.A. | 0 |
| NFYC-AS1     | -0,005817312 | 0,033154942  | 0 | N.A. | 0 |
| RP11-177J6.1 | -0,005820506 |              | 0 | N.A. | 0 |
| POMT1        | -0,005820809 | 0,052369059  | 0 | N.A. | 0 |
| KCNK10       | -0,005842817 | 0,134280488  | 0 | N.A. | 0 |
| DDX47        | -0,00590422  | -0,149156411 | 0 | N.A. | 0 |
| CTD-2503I6.1 | -0,005951266 |              | 0 | N.A. | 0 |
| AC004895.4   | -0,00599623  | 0,100530125  | 0 | N.A. | 0 |
| LTB4R        | -0,006045311 | 0,126824499  | 0 | N.A. | 0 |
| CREM         | -0,006091284 | -0,299074462 | 0 | N.A. | 0 |
| PRH2         | -0,006113561 |              | 0 | N.A. | 0 |
| CCR5         | -0,006118123 | 0,122834765  | 0 | N.A. | 0 |
| RP13-650J16  | -0,00613096  | 0,011657518  | 0 | N.A. | 0 |
| WWC2-AS2     | -0,006169886 | 0,118705979  | 0 | N.A. | 0 |
| MED18        | -0,006218954 | -0,090861905 | 0 | N.A. | 0 |
| RP11-552D8.  | -0,006271095 | 0,327317507  | 0 | N.A. | 0 |
| RP11-89F3.2  | -0,006290406 | -0,062627744 | 0 | N.A. | 0 |
| RP13-467H11  | -0,006301123 | -0,176306557 | 0 | N.A. | 0 |
| RP11-413M3   | -0,006324827 |              | 0 | N.A. | 0 |
| RP11-787I22  | -0,006365226 |              | 0 | N.A. | 0 |

|              |              |              |   |      |   |
|--------------|--------------|--------------|---|------|---|
| S1PR3        | -0,006378301 | 0,13353991   | 0 | N.A. | 0 |
| CDKL2        | -0,006425285 | 0,178802143  | 0 | N.A. | 0 |
| PRSS1        | -0,006451188 | 0,215332874  | 0 | N.A. | 0 |
| ZNF25        | -0,006460706 | 0,271915599  | 0 | N.A. | 0 |
| KRTAP1-1     | -0,006482609 |              | 0 | N.A. | 0 |
| AIFM2        | -0,006484292 | -0,016888806 | 0 | N.A. | 0 |
| SNURF        | -0,006551507 | -0,338316193 | 0 | N.A. | 0 |
| RP11-552F3.1 | -0,006610857 | 0,209574766  | 0 | N.A. | 0 |
| KATNAL1      | -0,006631992 | 0,069629519  | 0 | N.A. | 0 |
| DLL4         | -0,006654568 | 0,046706508  | 0 | N.A. | 0 |
| RP11-354P11  | -0,006665311 | 0,306815492  | 0 | N.A. | 0 |
| RP11-247A12  | -0,00666542  | -0,04965632  | 0 | N.A. | 0 |
| TRPC4AP      | -0,006691479 | 0,410120763  | 0 | N.A. | 0 |
| RP4-613B23.1 | -0,006692633 | 0,090175989  | 0 | N.A. | 0 |
| MTMR8        | -0,006698364 | 0,231985449  | 0 | N.A. | 0 |
| AOX1         | -0,006717788 | -0,187263351 | 0 | N.A. | 0 |
| LINC01436    | -0,006719173 | -0,328536498 | 0 | N.A. | 0 |
| RBM15        | -0,006723229 | -0,270030537 | 0 | N.A. | 0 |
| PABPC1L      | -0,006732305 | -0,083289627 | 0 | N.A. | 0 |
| MYO1F        | -0,006740878 | 0,080403452  | 0 | N.A. | 0 |
| SCAANT1      | -0,006784549 |              | 0 | N.A. | 0 |
| AC142293.3   | -0,006790392 | -0,121880195 | 0 | N.A. | 0 |
| ARHGAP24     | -0,006807397 | -0,061623998 | 0 | N.A. | 0 |
| MID1IP1-AS1  | -0,006810239 | 0,164993103  | 0 | N.A. | 0 |
| CTD-3064M3   | -0,006881046 |              | 0 | N.A. | 0 |
| MT-CO3       | -0,006884731 | 0,21473431   | 0 | N.A. | 0 |
| ST6GAL2      | -0,006892521 | -0,042481034 | 0 | N.A. | 0 |
| WDR78        | -0,006907768 | 0,307065894  | 0 | N.A. | 0 |
| LINC00309    | -0,006920412 |              | 0 | N.A. | 0 |
| PINK1-AS     | -0,00693188  | 0,222999212  | 0 | N.A. | 0 |
| RBM48        | -0,006935283 | -0,393535355 | 0 | N.A. | 0 |
| RP11-799D4.1 | -0,006940687 | 0,013574364  | 0 | N.A. | 0 |
| AC064834.1   | -0,006944846 | -0,334615788 | 0 | N.A. | 0 |

|             |              |              |   |      |   |
|-------------|--------------|--------------|---|------|---|
| LRRC39      | -0,006976329 | 0,034246956  | 0 | N.A. | 0 |
| DOCK2       | -0,006979    | 0,119668595  | 0 | N.A. | 0 |
| RP11-485G7. | -0,007070119 | -0,194949289 | 0 | N.A. | 0 |
| BCL9        | -0,007102961 | -0,067640586 | 0 | N.A. | 0 |
| NDN         | -0,007151575 | 0,022272456  | 0 | N.A. | 0 |
| STRADA      | -0,00715445  | 0,012045647  | 0 | N.A. | 0 |
| TAF1        | -0,00716797  | 0,324914006  | 0 | N.A. | 0 |
| MAT2A       | -0,00718615  | 0,299783252  | 0 | N.A. | 0 |
| ABCA3       | -0,007200605 | -0,042844987 | 0 | N.A. | 0 |
| ZFP2        | -0,007203369 | -0,059914316 | 0 | N.A. | 0 |
| FAM212B-AS  | -0,007235431 |              | 0 | N.A. | 0 |
| LINC00202-1 | -0,007241608 | 0,208006948  | 0 | N.A. | 0 |
| RSPH1       | -0,00724788  | -0,052841051 | 0 | N.A. | 0 |
| IFIT1B      | -0,00727443  |              | 0 | N.A. | 0 |
| AP001347.6  | -0,007277985 | -0,128302674 | 0 | N.A. | 0 |
| CCDC144NL   | -0,007362448 | -0,108389047 | 0 | N.A. | 0 |
| RP11-351M1  | -0,007367472 | 0,237388584  | 0 | N.A. | 0 |
| TEN1-CDK3   | -0,007389444 | 0,329727718  | 0 | N.A. | 0 |
| GPR171      | -0,007402753 | -0,025274358 | 0 | N.A. | 0 |
| TMEM56-RW   | -0,007420414 | -0,156191949 | 0 | N.A. | 0 |
| FBXO21      | -0,007434276 | 0,248234649  | 0 | N.A. | 0 |
| HIST2H4B    | -0,007434434 |              | 0 | N.A. | 0 |
| FOXG1       | -0,007435624 | -0,076788981 | 0 | N.A. | 0 |
| CCDC168     | -0,007457051 | -0,029872433 | 0 | N.A. | 0 |
| AC108142.1  | -0,007458279 | -0,179113103 | 0 | N.A. | 0 |
| DOK3        | -0,007469513 | -0,102312234 | 0 | N.A. | 0 |
| BEGAIN      | -0,007476241 | 0,004629465  | 0 | N.A. | 0 |
| PLIN2       | -0,007476241 | -0,20296877  | 0 | N.A. | 0 |
| RGS2        | -0,007486747 | 0,036194047  | 0 | N.A. | 0 |
| RP11-546K22 | -0,007504204 | 0,290468764  | 0 | N.A. | 0 |
| AZU1        | -0,007512187 |              | 0 | N.A. | 0 |
| KCNE1       | -0,007547804 |              | 0 | N.A. | 0 |
| KCNJ14      | -0,007555149 | -0,10562524  | 0 | N.A. | 0 |

|              |              |              |   |      |   |
|--------------|--------------|--------------|---|------|---|
| TLR2         | -0,007616433 | 0,131292385  | 0 | N.A. | 0 |
| TMPRSS9      | -0,007620663 |              | 0 | N.A. | 0 |
| RP11-93G5.1  | -0,007637384 | 0,145841722  | 0 | N.A. | 0 |
| RNFT1        | -0,007655787 | -0,045325082 | 0 | N.A. | 0 |
| ZBTB44       | -0,007661311 | -0,197774535 | 0 | N.A. | 0 |
| ADPGK        | -0,007721511 | -0,062484242 | 0 | N.A. | 0 |
| JADE2        | -0,00773143  | 0,232948148  | 0 | N.A. | 0 |
| ADCYAP1      | -0,007782008 | 0,027322808  | 0 | N.A. | 0 |
| ABCB11       | -0,007795698 |              | 0 | N.A. | 0 |
| C9orf72      | -0,007825664 | -0,039982681 | 0 | N.A. | 0 |
| TATDN3       | -0,007849896 | 0,054237472  | 0 | N.A. | 0 |
| ZNF500       | -0,00785876  | -0,056487976 | 0 | N.A. | 0 |
| RTBDN        | -0,007928789 |              | 0 | N.A. | 0 |
| RP5-851M4.1  | -0,007934454 |              | 0 | N.A. | 0 |
| C15orf41     | -0,007986042 | -0,059879744 | 0 | N.A. | 0 |
| PPP1R32      | -0,007992681 | 0,043437039  | 0 | N.A. | 0 |
| LY6K         | -0,008052476 | 0,018592192  | 0 | N.A. | 0 |
| AKAP9        | -0,00807229  | 0,349116586  | 0 | N.A. | 0 |
| ZNF630       | -0,008089438 | -0,080883264 | 0 | N.A. | 0 |
| RP11-345P4.1 | -0,008142771 | -0,116062048 | 0 | N.A. | 0 |
| NR2F1-AS1    | -0,008184238 | -0,104725616 | 0 | N.A. | 0 |
| INCA1        | -0,008205757 | -0,039890644 | 0 | N.A. | 0 |
| ZNF764       | -0,008213995 | -0,184539563 | 0 | N.A. | 0 |
| AC005224.2   | -0,008216825 | -0,039865291 | 0 | N.A. | 0 |
| LINC00630    | -0,00823427  | 0,284049898  | 0 | N.A. | 0 |
| BRD9         | -0,008294584 | 0,103368531  | 0 | N.A. | 0 |
| RP11-627G18  | -0,008299344 | 0,029070831  | 0 | N.A. | 0 |
| RP11-339B21  | -0,008303798 | -0,045211831 | 0 | N.A. | 0 |
| RP11-553A21  | -0,008315948 | -0,153881635 | 0 | N.A. | 0 |
| GZMM         | -0,008316828 | -0,19861074  | 0 | N.A. | 0 |
| OVOL1-AS1    | -0,008326799 | -0,094812583 | 0 | N.A. | 0 |
| RAPGEF6      | -0,008366837 | -0,336446018 | 0 | N.A. | 0 |
| SPRR2E       | -0,008379291 |              | 0 | N.A. | 0 |

|              |              |              |   |      |   |
|--------------|--------------|--------------|---|------|---|
| CD46         | -0,008447767 | 0,286160403  | 0 | N.A. | 0 |
| SUPT4H1      | -0,008451591 | -0,020633336 | 0 | N.A. | 0 |
| FAM110B      | -0,008452455 | -0,2577597   | 0 | N.A. | 0 |
| HEXA-AS1     | -0,00846479  | -0,088554534 | 0 | N.A. | 0 |
| PRTN3        | -0,008501893 |              | 0 | N.A. | 0 |
| RP11-276E17  | -0,008503822 | -0,310658695 | 0 | N.A. | 0 |
| AC107081.5   | -0,008509574 |              | 0 | N.A. | 0 |
| TFAP2E       | -0,008520554 |              | 0 | N.A. | 0 |
| LINC01169    | -0,008542178 |              | 0 | N.A. | 0 |
| SULT1A1      | -0,008550949 | -0,021353172 | 0 | N.A. | 0 |
| IFT140       | -0,008574243 | 0,069241894  | 0 | N.A. | 0 |
| ROR1-AS1     | -0,008601896 |              | 0 | N.A. | 0 |
| BAI1         | -0,008637287 | 0,127322382  | 0 | N.A. | 0 |
| CTD-2515A14  | -0,008658345 |              | 0 | N.A. | 0 |
| ZNF618       | -0,008706559 | 0,033868007  | 0 | N.A. | 0 |
| RP11-391J2.3 | -0,008774245 | 0,05933785   | 0 | N.A. | 0 |
| RP11-390P24  | -0,008786363 | -0,005195317 | 0 | N.A. | 0 |
| CDH19        | -0,008790237 |              | 0 | N.A. | 0 |
| CDH2         | -0,008790237 |              | 0 | N.A. | 0 |
| HSPB7        | -0,008790237 | -0,11147247  | 0 | N.A. | 0 |
| MYOT         | -0,008790237 |              | 0 | N.A. | 0 |
| PABPC5       | -0,008790237 |              | 0 | N.A. | 0 |
| PLP1         | -0,008790237 |              | 0 | N.A. | 0 |
| RADIL        | -0,008790237 |              | 0 | N.A. | 0 |
| RP11-557H19  | -0,008790237 |              | 0 | N.A. | 0 |
| RP11-92C4.6  | -0,008790237 | -0,338316193 | 0 | N.A. | 0 |
| SLC26A10     | -0,008790237 | -0,120597876 | 0 | N.A. | 0 |
| SLITRK2      | -0,008790237 |              | 0 | N.A. | 0 |
| ST3GAL6-AS1  | -0,008790237 | -0,268040146 | 0 | N.A. | 0 |
| ST6GALNAC5   | -0,008790237 | 0,179906687  | 0 | N.A. | 0 |
| TRPC4        | -0,008790237 |              | 0 | N.A. | 0 |
| RFX3-AS1     | -0,00879325  | -0,316218562 | 0 | N.A. | 0 |
| CCL18        | -0,008805053 | 0,028922551  | 0 | N.A. | 0 |

|             |              |              |   |      |   |
|-------------|--------------|--------------|---|------|---|
| C15orf27    | -0,008837193 | -0,045211831 | 0 | N.A. | 0 |
| FOXD4L1     | -0,008846114 |              | 0 | N.A. | 0 |
| CCDC85A     | -0,008859598 | -0,066982504 | 0 | N.A. | 0 |
| OSR1        | -0,008874784 | -0,082059541 | 0 | N.A. | 0 |
| MAP3K7      | -0,008912742 | -0,126759715 | 0 | N.A. | 0 |
| PEX2        | -0,009001321 | -0,074481851 | 0 | N.A. | 0 |
| RP11-107M1  | -0,009068283 | -0,118487322 | 0 | N.A. | 0 |
| RP11-108K3. | -0,009079511 | -0,045182377 | 0 | N.A. | 0 |
| RP5-1028K7. | -0,009083872 | -0,239605536 | 0 | N.A. | 0 |
| CRLF3       | -0,009086271 | 0,079535178  | 0 | N.A. | 0 |
| ANKS3       | -0,009120728 | 0,282609465  | 0 | N.A. | 0 |
| GRM4        | -0,009120923 |              | 0 | N.A. | 0 |
| RP11-383M4  | -0,00919415  | -0,047646538 | 0 | N.A. | 0 |
| RP4-534N18. | -0,009194193 |              | 0 | N.A. | 0 |
| RBM15B      | -0,009195862 | 0,144198685  | 0 | N.A. | 0 |
| PTDSS2      | -0,009218772 | -0,06064974  | 0 | N.A. | 0 |
| RUNDC3B     | -0,00922216  | 0,07023245   | 0 | N.A. | 0 |
| RP11-259N19 | -0,009282776 | 0,191982634  | 0 | N.A. | 0 |
| PARVG       | -0,009296748 | -0,159331328 | 0 | N.A. | 0 |
| PROZ        | -0,009300723 | 0,117826795  | 0 | N.A. | 0 |
| CHKB-CPT1B  | -0,00938451  | 0,073785746  | 0 | N.A. | 0 |
| INHBA       | -0,009402737 | -0,065442293 | 0 | N.A. | 0 |
| POLH        | -0,009426173 | -0,065135267 | 0 | N.A. | 0 |
| MFAP3L      | -0,009438069 | -0,093326318 | 0 | N.A. | 0 |
| BANP        | -0,009475504 | -0,073817776 | 0 | N.A. | 0 |
| RP11-1100L3 | -0,009503131 | 0,285769448  | 0 | N.A. | 0 |
| RP11-504A18 | -0,009515828 | 0,141658286  | 0 | N.A. | 0 |
| CTD-2006H14 | -0,009534942 | 0,040554777  | 0 | N.A. | 0 |
| LINC01372   | -0,009569818 | 0,164633872  | 0 | N.A. | 0 |
| AC008781.7  | -0,009584584 | -0,113815587 | 0 | N.A. | 0 |
| NCKIPSD     | -0,009604358 | 0,048435344  | 0 | N.A. | 0 |
| RP11-403P17 | -0,009610729 |              | 0 | N.A. | 0 |
| NSUN4       | -0,009624781 | 0,089403254  | 0 | N.A. | 0 |

|             |              |              |   |      |   |
|-------------|--------------|--------------|---|------|---|
| SNRPN       | -0,009626504 | -0,093921772 | 0 | N.A. | 0 |
| HYAL2       | -0,009630671 | 0,469625062  | 0 | N.A. | 0 |
| CEP97       | -0,009658451 | -0,040600523 | 0 | N.A. | 0 |
| AGER        | -0,009668131 | 0,083632317  | 0 | N.A. | 0 |
| PRDM11      | -0,009668744 | -0,11930917  | 0 | N.A. | 0 |
| SLC4A4      | -0,009710955 | 0,074488381  | 0 | N.A. | 0 |
| TUBA1A      | -0,009711616 | 0,14732137   | 0 | N.A. | 0 |
| CTC-350I8.1 | -0,009712128 | 0,092101135  | 0 | N.A. | 0 |
| RP11-449P15 | -0,009716912 | 0,262317464  | 0 | N.A. | 0 |
| SOX10       | -0,009723454 |              | 0 | N.A. | 0 |
| ZNF248      | -0,009739168 | -0,2013252   | 0 | N.A. | 0 |
| CYP51A1     | -0,009761337 | 0,177093404  | 0 | N.A. | 0 |
| RP11-162A12 | -0,00979096  | -0,264693937 | 0 | N.A. | 0 |
| RDX         | -0,009794953 | -0,218493636 | 0 | N.A. | 0 |
| RP11-1275H2 | -0,009805265 | -0,018265408 | 0 | N.A. | 0 |
| RP11-395B7. | -0,009806028 | 0,157294363  | 0 | N.A. | 0 |
| CTD-2165H1  | -0,009807522 | 0,072544781  | 0 | N.A. | 0 |
| ACACB       | -0,009816756 | -0,057412396 | 0 | N.A. | 0 |
| RP11-95O2.5 | -0,009832938 |              | 0 | N.A. | 0 |
| ZGPAT       | -0,009862504 | -0,084367225 | 0 | N.A. | 0 |
| UHRF1BP1L   | -0,009866583 | -0,031175651 | 0 | N.A. | 0 |
| AC005592.2  | -0,009871639 | 0,140115259  | 0 | N.A. | 0 |
| ZNF10       | -0,009919352 | -0,234561615 | 0 | N.A. | 0 |
| GPR133      | -0,009924953 |              | 0 | N.A. | 0 |
| RP11-421L21 | -0,009953673 | -0,068864438 | 0 | N.A. | 0 |
| ANXA9       | -0,009956806 | -0,235529911 | 0 | N.A. | 0 |
| MIATNB      | -0,009963577 | 0,000780525  | 0 | N.A. | 0 |
| CELA1       | -0,009998462 |              | 0 | N.A. | 0 |
| CTD-2245F17 | -0,010003193 | -0,123764265 | 0 | N.A. | 0 |
| CLDN5       | -0,01000392  | 0,130647893  | 0 | N.A. | 0 |
| TCF24       | -0,010013381 | 0,417736727  | 0 | N.A. | 0 |
| IPP         | -0,01001621  | 0,077169025  | 0 | N.A. | 0 |
| RP11-392P7. | -0,010016698 | -0,23161075  | 0 | N.A. | 0 |

|              |              |              |   |      |   |
|--------------|--------------|--------------|---|------|---|
| RP11-248M1   | -0,010023616 |              | 0 | N.A. | 0 |
| KB-1507C5.2  | -0,010027554 | -0,315902064 | 0 | N.A. | 0 |
| CTD-2201E18  | -0,010031635 | 0,011644009  | 0 | N.A. | 0 |
| RP4-594I10.3 | -0,01003406  | -0,184137806 | 0 | N.A. | 0 |
| NBPF1        | -0,010052999 | -0,060608877 | 0 | N.A. | 0 |
| MC1R         | -0,010105212 | -0,059511062 | 0 | N.A. | 0 |
| CHGB         | -0,010116178 | -0,003314536 | 0 | N.A. | 0 |
| ZNF708       | -0,010125769 | 0,096791004  | 0 | N.A. | 0 |
| CCDC180      | -0,010155732 | 0,027225882  | 0 | N.A. | 0 |
| OTUD7A       | -0,010158871 | 0,101526288  | 0 | N.A. | 0 |
| PRSS33       | -0,010208216 | 0,281880059  | 0 | N.A. | 0 |
| RMND5B       | -0,010218734 | -0,015094025 | 0 | N.A. | 0 |
| LYPD6B       | -0,010226773 | 0,3820784    | 0 | N.A. | 0 |
| PDCD1        | -0,010231253 | -0,25107506  | 0 | N.A. | 0 |
| ZFAT         | -0,010245334 | -0,04146337  | 0 | N.A. | 0 |
| RN7SL832P    | -0,010247107 | 0,072109535  | 0 | N.A. | 0 |
| AC133528.2   | -0,010275334 | 0,174016899  | 0 | N.A. | 0 |
| RP11-366L5.1 | -0,010279761 | 0,399700867  | 0 | N.A. | 0 |
| HLCS         | -0,010330639 | 0,097367578  | 0 | N.A. | 0 |
| RP11-277A4.1 | -0,010331275 | -0,02742486  | 0 | N.A. | 0 |
| ZAR1L        | -0,010334321 |              | 0 | N.A. | 0 |
| HIST1H3F     | -0,010353834 | -0,13213753  | 0 | N.A. | 0 |
| ALKBH5       | -0,010359432 | 0,262286617  | 0 | N.A. | 0 |
| SDR42E2      | -0,010362618 | -0,116051518 | 0 | N.A. | 0 |
| HIST1H3H     | -0,010382391 | -0,089324489 | 0 | N.A. | 0 |
| CACNB3       | -0,010399543 | 0,105304892  | 0 | N.A. | 0 |
| IGLL1        | -0,010405096 |              | 0 | N.A. | 0 |
| RP11-319E16  | -0,010417406 | -0,068696423 | 0 | N.A. | 0 |
| TMEM213      | -0,010419962 | -0,002060108 | 0 | N.A. | 0 |
| C10orf76     | -0,010441191 | -0,087672869 | 0 | N.A. | 0 |
| ELDR         | -0,010468577 |              | 0 | N.A. | 0 |
| ROBO4        | -0,010507209 | -0,124040505 | 0 | N.A. | 0 |
| RAB36        | -0,01053143  | -0,20067844  | 0 | N.A. | 0 |



|             |              |              |   |      |   |
|-------------|--------------|--------------|---|------|---|
| CLEC2D      | -0,010546571 | -0,180587793 | 0 | N.A. | 0 |
| FADS3       | -0,010565217 | 0,102440892  | 0 | N.A. | 0 |
| RP13-1039J1 | -0,010574395 | 0,023151751  | 0 | N.A. | 0 |
| HIST1H3J    | -0,010593949 | -0,181190358 | 0 | N.A. | 0 |
| RTCA        | -0,010613428 | -0,136591355 | 0 | N.A. | 0 |
| ZNF350      | -0,010697314 | 0,007859879  | 0 | N.A. | 0 |
| PTPN2       | -0,010697338 | 0,03196784   | 0 | N.A. | 0 |
| LYPD5       | -0,010704591 | -0,280619257 | 0 | N.A. | 0 |
| KANTR       | -0,010723051 | -0,017664637 | 0 | N.A. | 0 |
| IGFALS      | -0,010754881 | 0,011265832  | 0 | N.A. | 0 |
| TPCN2       | -0,010755262 | 0,084579858  | 0 | N.A. | 0 |
| RP11-1E4.1  | -0,010762323 | 0,239370682  | 0 | N.A. | 0 |
| RP1-41C23.4 | -0,01077061  | 0,041734934  | 0 | N.A. | 0 |
| C2orf81     | -0,010808219 | -0,102120877 | 0 | N.A. | 0 |
| HNRNPUL2    | -0,010823636 | 0,247361505  | 0 | N.A. | 0 |
| SPSB2       | -0,010835803 | 0,399308381  | 0 | N.A. | 0 |
| TCEANC      | -0,010884426 | 0,284306348  | 0 | N.A. | 0 |
| RP11-90D11. | -0,010886185 |              | 0 | N.A. | 0 |
| MDFIC       | -0,010898383 | 0,147626329  | 0 | N.A. | 0 |
| ANO7        | -0,010925556 | -0,131015586 | 0 | N.A. | 0 |
| PAX9        | -0,010960446 | 0,118345058  | 0 | N.A. | 0 |
| RP11-290F5. | -0,011029312 | -0,063696316 | 0 | N.A. | 0 |
| C8orf82     | -0,011032611 | 0,309157076  | 0 | N.A. | 0 |
| CDKL1       | -0,011093836 | -0,382331553 | 0 | N.A. | 0 |
| CTA-204B4.2 | -0,011169527 | 0,125217132  | 0 | N.A. | 0 |
| WASF3       | -0,011202785 | -0,239822341 | 0 | N.A. | 0 |
| RP11-70C1.1 | -0,011217419 |              | 0 | N.A. | 0 |
| RP11-874J12 | -0,011231561 | -0,118937287 | 0 | N.A. | 0 |
| YIPF4       | -0,011275706 | 0,450461419  | 0 | N.A. | 0 |
| KIAA1549    | -0,011339414 | 0,223483996  | 0 | N.A. | 0 |
| KRTDAP      | -0,011358559 | 0,184781697  | 0 | N.A. | 0 |
| AP000936.4  | -0,011395764 |              | 0 | N.A. | 0 |
| RNF133      | -0,011438348 |              | 0 | N.A. | 0 |

|              |              |              |   |      |   |
|--------------|--------------|--------------|---|------|---|
| RHOBTB2      | -0,011466221 | 0,251803457  | 0 | N.A. | 0 |
| OBSCN        | -0,011468574 | -0,103102682 | 0 | N.A. | 0 |
| RTKN         | -0,011476635 | 0,458531052  | 0 | N.A. | 0 |
| DGKI         | -0,011478828 |              | 0 | N.A. | 0 |
| GS1-293C5.1  | -0,01148677  | 0,347170563  | 0 | N.A. | 0 |
| GAS2L3       | -0,011507548 | -0,294655716 | 0 | N.A. | 0 |
| RP11-527L4.1 | -0,011508299 |              | 0 | N.A. | 0 |
| MTX3         | -0,011514373 | -0,260452817 | 0 | N.A. | 0 |
| ZNF215       | -0,011531824 | -0,367794363 | 0 | N.A. | 0 |
| DLX2         | -0,011562391 | 0,19195881   | 0 | N.A. | 0 |
| GPR75-ASB3   | -0,011582231 | 0,113554045  | 0 | N.A. | 0 |
| CTD-2562J15  | -0,01162828  | 0,008897243  | 0 | N.A. | 0 |
| PCSK1N       | -0,011628409 | 0,195582835  | 0 | N.A. | 0 |
| CTD-2196E14  | -0,011680138 | 0,262282366  | 0 | N.A. | 0 |
| CENPB        | -0,01170001  | 0,333880576  | 0 | N.A. | 0 |
| SIX5         | -0,011710592 | -0,102931928 | 0 | N.A. | 0 |
| RGS9         | -0,011779699 |              | 0 | N.A. | 0 |
| DDX6         | -0,011781804 | 0,298535709  | 0 | N.A. | 0 |
| MAP1A        | -0,011882965 |              | 0 | N.A. | 0 |
| RP11-384O8.1 | -0,01190482  | 0,051905023  | 0 | N.A. | 0 |
| CEP95        | -0,011961375 | 0,012830043  | 0 | N.A. | 0 |
| CTB-50L17.14 | -0,011967277 |              | 0 | N.A. | 0 |
| RP11-290L1.1 | -0,012003752 | -0,058784395 | 0 | N.A. | 0 |
| FAM24B       | -0,01215422  | -0,32514249  | 0 | N.A. | 0 |
| EFHD1        | -0,012206028 | -0,100425843 | 0 | N.A. | 0 |
| MANEAL       | -0,012218435 | 0,129466042  | 0 | N.A. | 0 |
| ZFC3H1       | -0,012223768 | 0,247874988  | 0 | N.A. | 0 |
| PIK3CD-AS2   | -0,012262319 | -0,338665365 | 0 | N.A. | 0 |
| HCFC2        | -0,012317077 | 0,334825467  | 0 | N.A. | 0 |
| DDX19B       | -0,012375107 | -0,087632615 | 0 | N.A. | 0 |
| RP11-96L14.1 | -0,01240293  | 0,231663617  | 0 | N.A. | 0 |
| IL6          | -0,012426373 | -0,023286072 | 0 | N.A. | 0 |
| ERG          | -0,012440294 | -0,115927138 | 0 | N.A. | 0 |

|              |              |              |   |      |   |
|--------------|--------------|--------------|---|------|---|
| KBTBD3       | -0,012482426 | -0,066219669 | 0 | N.A. | 0 |
| HOXA2        | -0,012486423 | -0,09497712  | 0 | N.A. | 0 |
| LINC00948    | -0,012498945 | -0,30603189  | 0 | N.A. | 0 |
| CLDN14       | -0,012526329 | 0,034165711  | 0 | N.A. | 0 |
| ADORA2B      | -0,012534908 | 0,140837072  | 0 | N.A. | 0 |
| PLAC8L1      | -0,012565801 | 0,140795559  | 0 | N.A. | 0 |
| RFPL3S       | -0,012575195 | 0,256599365  | 0 | N.A. | 0 |
| DHX8         | -0,012591574 | 0,054518353  | 0 | N.A. | 0 |
| XYLT2        | -0,012593944 | 0,183837572  | 0 | N.A. | 0 |
| GLIDR        | -0,012605086 | -0,270323656 | 0 | N.A. | 0 |
| PDE6G        | -0,012622499 |              | 0 | N.A. | 0 |
| SLC39A1      | -0,012700241 | 0,62323366   | 0 | N.A. | 0 |
| BAG4         | -0,012705851 | 0,136642692  | 0 | N.A. | 0 |
| KLHL2        | -0,012725607 | 0,166921291  | 0 | N.A. | 0 |
| LRRC8B       | -0,012773723 | 0,032361044  | 0 | N.A. | 0 |
| AC142528.1   | -0,012799331 | -0,007839244 | 0 | N.A. | 0 |
| UFSP1        | -0,012840639 | -0,053358552 | 0 | N.A. | 0 |
| RP11-1000B6  | -0,012856361 | -0,064836799 | 0 | N.A. | 0 |
| RP11-95116.4 | -0,012877034 |              | 0 | N.A. | 0 |
| CCDC122      | -0,012897458 | 0,057886901  | 0 | N.A. | 0 |
| RP11-379K17  | -0,012901483 | -0,189247249 | 0 | N.A. | 0 |
| PNISR        | -0,012905935 | 0,170138917  | 0 | N.A. | 0 |
| MCPH1        | -0,012917944 | 0,269664901  | 0 | N.A. | 0 |
| TUBB2B       | -0,012949681 | 0,259573147  | 0 | N.A. | 0 |
| FAM106A      | -0,012960301 |              | 0 | N.A. | 0 |
| NCR3LG1      | -0,012964575 | -0,051221269 | 0 | N.A. | 0 |
| CAMP         | -0,012967761 |              | 0 | N.A. | 0 |
| RP11-130L8.1 | -0,012982585 | 0,092024492  | 0 | N.A. | 0 |
| RP11-36817.6 | -0,012991278 | 0,02407142   | 0 | N.A. | 0 |
| PLGLB1       | -0,013052144 | 0,235675194  | 0 | N.A. | 0 |
| RP11-98G7.1  | -0,013052632 |              | 0 | N.A. | 0 |
| COX4I2       | -0,01305495  | -0,031344298 | 0 | N.A. | 0 |
| MIA2         | -0,013061249 | 0,228708934  | 0 | N.A. | 0 |

|             |              |              |   |      |   |
|-------------|--------------|--------------|---|------|---|
| POMT2       | -0,013063745 | 0,101964194  | 0 | N.A. | 0 |
| TTC33       | -0,013079096 | 0,011181945  | 0 | N.A. | 0 |
| MSX1        | -0,013161941 | -0,016535301 | 0 | N.A. | 0 |
| FAM66D      | -0,013176295 |              | 0 | N.A. | 0 |
| BLNK        | -0,013183261 | -0,106803249 | 0 | N.A. | 0 |
| HOXA13      | -0,013205428 | 0,114298196  | 0 | N.A. | 0 |
| CATSPERD    | -0,013207233 | 0,286869231  | 0 | N.A. | 0 |
| OLAH        | -0,013242796 |              | 0 | N.A. | 0 |
| ADAMDEC1    | -0,01324398  | 0,066408498  | 0 | N.A. | 0 |
| GFOD1       | -0,01324401  | 0,126180092  | 0 | N.A. | 0 |
| SIKE1       | -0,013249307 | 0,071517199  | 0 | N.A. | 0 |
| RP11-582J16 | -0,013262561 | 0,245688367  | 0 | N.A. | 0 |
| GMFG        | -0,013274873 | -0,382461965 | 0 | N.A. | 0 |
| MDS2        | -0,013290321 | -0,393250958 | 0 | N.A. | 0 |
| C1orf122    | -0,013321203 | 0,343144331  | 0 | N.A. | 0 |
| LINC00337   | -0,01333244  | -0,075620245 | 0 | N.A. | 0 |
| TRGV10      | -0,013387123 |              | 0 | N.A. | 0 |
| HM13-AS1    | -0,013393099 | -0,245049769 | 0 | N.A. | 0 |
| RP11-426C22 | -0,013402065 |              | 0 | N.A. | 0 |
| NDUFB2-AS1  | -0,013428256 | -0,047887619 | 0 | N.A. | 0 |
| NUDT11      | -0,01345463  | -0,041666698 | 0 | N.A. | 0 |
| FUZ         | -0,013455878 | -0,133661271 | 0 | N.A. | 0 |
| WRN         | -0,013519615 | 0,119098256  | 0 | N.A. | 0 |
| REEP1       | -0,01353088  | 0,292183342  | 0 | N.A. | 0 |
| USP19       | -0,013549726 | 0,301081384  | 0 | N.A. | 0 |
| RIMKLB      | -0,013580899 | -0,079956686 | 0 | N.A. | 0 |
| HSD17B1     | -0,013590822 | -0,143101507 | 0 | N.A. | 0 |
| PCAT29      | -0,01359919  |              | 0 | N.A. | 0 |
| RP11-54O7.1 | -0,013607789 |              | 0 | N.A. | 0 |
| CRYZ        | -0,013615144 | 0,166246396  | 0 | N.A. | 0 |
| ZNF565      | -0,013635209 | -0,095565005 | 0 | N.A. | 0 |
| PHACTR4     | -0,013677806 | 0,136965101  | 0 | N.A. | 0 |
| HMSD        | -0,0136903   | -0,092254307 | 0 | N.A. | 0 |

|             |              |              |   |      |   |
|-------------|--------------|--------------|---|------|---|
| CHD8        | -0,013716643 | 0,086861464  | 0 | N.A. | 0 |
| ST8SIA4     | -0,013722324 | -0,250169038 | 0 | N.A. | 0 |
| AC011747.3  | -0,013791876 | 0,285224053  | 0 | N.A. | 0 |
| NGFR        | -0,013797723 |              | 0 | N.A. | 0 |
| SLC1A2      | -0,013810864 | 0,13567291   | 0 | N.A. | 0 |
| PARD6G      | -0,013813396 | -0,153348924 | 0 | N.A. | 0 |
| AC093620.5  | -0,013839696 | 0,440359039  | 0 | N.A. | 0 |
| PCDHGA3     | -0,013858614 | -0,075534426 | 0 | N.A. | 0 |
| SP9         | -0,013859595 |              | 0 | N.A. | 0 |
| RP11-15E18. | -0,013930352 | 0,053262862  | 0 | N.A. | 0 |
| TRAM2       | -0,013947126 | 0,212449181  | 0 | N.A. | 0 |
| KIAA0753    | -0,013966238 | 0,185154636  | 0 | N.A. | 0 |
| RP1-10C16.1 | -0,0139796   | -0,04044213  | 0 | N.A. | 0 |
| RP11-57201  | -0,013988201 | -0,119254904 | 0 | N.A. | 0 |
| LILRB4      | -0,013992193 | -0,151109869 | 0 | N.A. | 0 |
| ZNF318      | -0,014023403 | 0,12430483   | 0 | N.A. | 0 |
| C14orf105   | -0,014028338 | -0,079010884 | 0 | N.A. | 0 |
| IPPK        | -0,014057881 | -0,015778478 | 0 | N.A. | 0 |
| RP11-603J24 | -0,014070546 |              | 0 | N.A. | 0 |
| LINC00265   | -0,014079853 | -0,203081768 | 0 | N.A. | 0 |
| SHISA2      | -0,014139298 | 0,136511235  | 0 | N.A. | 0 |
| B4GALT6     | -0,014170111 | 0,03996466   | 0 | N.A. | 0 |
| ANKZF1      | -0,014170851 | 0,239373116  | 0 | N.A. | 0 |
| TIGD3       | -0,01418543  | -0,048894039 | 0 | N.A. | 0 |
| C5orf66     | -0,014188289 | 0,168974432  | 0 | N.A. | 0 |
| ZNF577      | -0,014214132 | -0,04125553  | 0 | N.A. | 0 |
| MS4A8       | -0,014249468 | 0,103104331  | 0 | N.A. | 0 |
| ULBP1       | -0,014260184 | 0,168436081  | 0 | N.A. | 0 |
| RP11-944C7. | -0,0142681   | -0,264657465 | 0 | N.A. | 0 |
| NDST2       | -0,014292421 | 0,138068062  | 0 | N.A. | 0 |
| CTD-3010D2. | -0,014304878 | 0,043583768  | 0 | N.A. | 0 |
| RTN4RL1     | -0,014330657 |              | 0 | N.A. | 0 |
| FAM120B     | -0,014335747 | 0,101774674  | 0 | N.A. | 0 |

|             |              |              |   |      |   |
|-------------|--------------|--------------|---|------|---|
| RGAG4       | -0,014365901 |              | 0 | N.A. | 0 |
| ANAPC2      | -0,014379681 | -0,006704193 | 0 | N.A. | 0 |
| RP11-219A15 | -0,014381279 | 0,211863958  | 0 | N.A. | 0 |
| AC000403.4  | -0,014466482 |              | 0 | N.A. | 0 |
| FLT3LG      | -0,014480794 | 0,067836486  | 0 | N.A. | 0 |
| AC007228.11 | -0,01448936  | 0,126983831  | 0 | N.A. | 0 |
| CDH7        | -0,014490365 | 0,045875056  | 0 | N.A. | 0 |
| KIFAP3      | -0,014535978 | 0,073742233  | 0 | N.A. | 0 |
| RP11-58C22. | -0,014572901 |              | 0 | N.A. | 0 |
| RP11-408A13 | -0,014589465 | -0,007613536 | 0 | N.A. | 0 |
| USP44       | -0,014643276 | 0,049494608  | 0 | N.A. | 0 |
| TMEM221     | -0,014644624 |              | 0 | N.A. | 0 |
| AC004156.3  | -0,014683031 | -0,063655608 | 0 | N.A. | 0 |
| ZNF252P-AS1 | -0,014691973 | 0,082689298  | 0 | N.A. | 0 |
| FSIP1       | -0,014692062 | 0,097348129  | 0 | N.A. | 0 |
| CPNE2       | -0,014695249 | -0,051434003 | 0 | N.A. | 0 |
| SGTB        | -0,014732348 | -0,060451361 | 0 | N.A. | 0 |
| XXbac-BPG59 | -0,014736727 |              | 0 | N.A. | 0 |
| BZRAP1      | -0,014743108 | 0,023740738  | 0 | N.A. | 0 |
| NEURL4      | -0,014757335 | 0,260761605  | 0 | N.A. | 0 |
| ABL1        | -0,014760063 | -0,145049754 | 0 | N.A. | 0 |
| NPIP6       | -0,014773709 | 0,101400219  | 0 | N.A. | 0 |
| RP11-296K13 | -0,014789036 |              | 0 | N.A. | 0 |
| AC006547.15 | -0,014803765 |              | 0 | N.A. | 0 |
| HOXA10-HOX  | -0,0148139   | 0,055215796  | 0 | N.A. | 0 |
| RP4-535B20. | -0,014819476 | 0,191323033  | 0 | N.A. | 0 |
| PRODH2      | -0,014857846 | -0,01298123  | 0 | N.A. | 0 |
| FAM124A     | -0,014862011 | -0,00208848  | 0 | N.A. | 0 |
| SPZ1        | -0,014866226 | -0,034769699 | 0 | N.A. | 0 |
| ZCCHC11     | -0,014873549 | -0,038916626 | 0 | N.A. | 0 |
| CACNB1      | -0,014905924 | -0,030190372 | 0 | N.A. | 0 |
| RP11-379F4. | -0,014933234 | -0,13247871  | 0 | N.A. | 0 |
| HIST1H3I    | -0,014940579 | -0,071900501 | 0 | N.A. | 0 |

|             |              |              |   |      |   |
|-------------|--------------|--------------|---|------|---|
| TLE2        | -0,014964741 | -0,260159342 | 0 | N.A. | 0 |
| DHH         | -0,014975367 |              | 0 | N.A. | 0 |
| RP11-115D19 | -0,014976646 | 0,01594531   | 0 | N.A. | 0 |
| ANXA5       | -0,014990046 | -0,03773587  | 0 | N.A. | 0 |
| RP11-506H20 | -0,015009251 | 0,009333675  | 0 | N.A. | 0 |
| KIAA0196    | -0,015013815 | -0,011165215 | 0 | N.A. | 0 |
| KLHDC2      | -0,015039459 | 0,047951774  | 0 | N.A. | 0 |
| ENDOU       | -0,015051618 | 0,012990927  | 0 | N.A. | 0 |
| C17orf99    | -0,015077191 | 0,001666266  | 0 | N.A. | 0 |
| ST20-MTHFS  | -0,015081866 | 0,079012914  | 0 | N.A. | 0 |
| RP11-188P20 | -0,015090873 |              | 0 | N.A. | 0 |
| RP11-342K6. | -0,015106966 | 0,264693109  | 0 | N.A. | 0 |
| KCNMB4      | -0,015115866 | 0,350334465  | 0 | N.A. | 0 |
| LMAN2L      | -0,015160505 | 0,271012124  | 0 | N.A. | 0 |
| RP11-285F16 | -0,015165307 |              | 0 | N.A. | 0 |
| WFDC2       | -0,015170769 | -0,1458914   | 0 | N.A. | 0 |
| ACAD11      | -0,015200159 | 0,235802851  | 0 | N.A. | 0 |
| PCDHA4      | -0,015217468 | 0,117438775  | 0 | N.A. | 0 |
| KAT7        | -0,015231485 | -0,214069517 | 0 | N.A. | 0 |
| CTD-2331H1  | -0,015240381 | 0,08921264   | 0 | N.A. | 0 |
| RP11-196G18 | -0,015242011 | 0,039636734  | 0 | N.A. | 0 |
| MYCBPAP     | -0,015282426 |              | 0 | N.A. | 0 |
| HINT3       | -0,015282895 | 0,203549064  | 0 | N.A. | 0 |
| ZEB1-AS1    | -0,015298978 | 0,187122775  | 0 | N.A. | 0 |
| SLC25A41    | -0,015311842 | 0,169157984  | 0 | N.A. | 0 |
| AGAP2       | -0,015323374 | -0,330554979 | 0 | N.A. | 0 |
| CH17-264L24 | -0,015332308 |              | 0 | N.A. | 0 |
| RPTOR       | -0,015356456 | -0,091280471 | 0 | N.A. | 0 |
| FHAD1       | -0,015384014 | 0,061784818  | 0 | N.A. | 0 |
| ADSS        | -0,01546394  | 0,208012492  | 0 | N.A. | 0 |
| NANOG       | -0,015473246 | 0,01477552   | 0 | N.A. | 0 |
| RP11-192H23 | -0,015532586 | -0,032667423 | 0 | N.A. | 0 |
| OLFML1      | -0,015537842 |              | 0 | N.A. | 0 |

|              |              |              |   |      |   |
|--------------|--------------|--------------|---|------|---|
| MYCL         | -0,015628666 | -0,296621151 | 0 | N.A. | 0 |
| FIG4         | -0,015650314 | -0,056198593 | 0 | N.A. | 0 |
| ZNF426       | -0,015781058 | -0,228099489 | 0 | N.A. | 0 |
| BRSK2        | -0,015792228 | 0,186107575  | 0 | N.A. | 0 |
| HNMT         | -0,015826769 | -0,070636572 | 0 | N.A. | 0 |
| SPTBN4       | -0,015838257 | 0,223428194  | 0 | N.A. | 0 |
| CAPN6        | -0,015871971 | -0,078286463 | 0 | N.A. | 0 |
| AC011242.6   | -0,015878906 | -0,034419692 | 0 | N.A. | 0 |
| DACT1        | -0,015882382 | 0,023023374  | 0 | N.A. | 0 |
| TREM2        | -0,015900474 | 0,093796351  | 0 | N.A. | 0 |
| FGFRL1       | -0,015950692 | 0,147690767  | 0 | N.A. | 0 |
| WISP3        | -0,016054118 | 0,076621917  | 0 | N.A. | 0 |
| MVD          | -0,016074261 | 0,294487388  | 0 | N.A. | 0 |
| RP11-342I1.2 | -0,016078918 | -0,025234084 | 0 | N.A. | 0 |
| CASC3        | -0,016105185 | 0,18553316   | 0 | N.A. | 0 |
| HAGLR        | -0,016130149 | -0,040461275 | 0 | N.A. | 0 |
| SSC4D        | -0,016131297 | -0,122357479 | 0 | N.A. | 0 |
| RSBN1        | -0,016131735 | 0,095370631  | 0 | N.A. | 0 |
| CLDN6        | -0,016145751 |              | 0 | N.A. | 0 |
| TRIM41       | -0,016169081 | -0,205026752 | 0 | N.A. | 0 |
| PYCARD-AS1   | -0,016170589 | 0,120221397  | 0 | N.A. | 0 |
| GAREML       | -0,016181363 | -0,212427927 | 0 | N.A. | 0 |
| CCDC181      | -0,016211156 | 0,200300704  | 0 | N.A. | 0 |
| STYX         | -0,016261907 | -0,230692133 | 0 | N.A. | 0 |
| C12orf4      | -0,016265435 | -0,021193278 | 0 | N.A. | 0 |
| AKR1C1       | -0,016271306 | 0,052657582  | 0 | N.A. | 0 |
| GPBAR1       | -0,016293391 | 0,055879383  | 0 | N.A. | 0 |
| AK9          | -0,016325385 | -0,227182585 | 0 | N.A. | 0 |
| RP11-66N24.  | -0,016333002 | 0,036499921  | 0 | N.A. | 0 |
| MTRNR2L4     | -0,016333333 | -0,004703053 | 0 | N.A. | 0 |
| RP11-22A3.2  | -0,016404947 | 0,250259409  | 0 | N.A. | 0 |
| COL3A1       | -0,016420334 | -0,110831554 | 0 | N.A. | 0 |
| MTMR4        | -0,016450373 | -0,050645869 | 0 | N.A. | 0 |



|               |                     |                    |          |            |   |
|---------------|---------------------|--------------------|----------|------------|---|
| RUNDC3A-AS    | -0,016483712        | 0,140101286        | 0        | N.A.       | 0 |
| HEG1          | -0,0164928          | 0,136120671        | 0        | N.A.       | 0 |
| FLT4          | -0,016513594        | 0,022898799        | 0        | N.A.       | 0 |
| PPP1R3E       | -0,016530629        | 0,301008054        | 0        | N.A.       | 0 |
| NEGR1         | -0,016543959        |                    | 0        | N.A.       | 0 |
| RP11-669C19   | -0,016580326        |                    | 0        | N.A.       | 0 |
| RP3-395M20    | -0,016585481        | 0,190838049        | 0        | N.A.       | 0 |
| ZFP3          | -0,016592471        | -0,081027798       | 0        | N.A.       | 0 |
| PIGB          | -0,016608122        | -0,054419438       | 0        | N.A.       | 0 |
| USP37         | -0,01661476         | -0,148405307       | 0        | N.A.       | 0 |
| RP11-173C1.   | -0,016621534        | -0,243706005       | 0        | N.A.       | 0 |
| RUSC2         | -0,016648978        | -0,003833361       | 0        | N.A.       | 0 |
| <b>FBXL13</b> | <b>-0,016707322</b> | <b>-0,00863128</b> | <b>1</b> | <b>cl1</b> | 0 |
| EPB41         | -0,016712537        | -0,000447986       | 0        | N.A.       | 0 |
| LGALS8-AS1    | -0,016726654        | -0,059534745       | 0        | N.A.       | 0 |
| RP11-778D9.   | -0,016743223        | -0,19313276        | 0        | N.A.       | 0 |
| MCF2L2        | -0,016766302        | 0,265810237        | 0        | N.A.       | 0 |
| RP11-94I2.4   | -0,016766435        | 0,032182556        | 0        | N.A.       | 0 |
| RP11-154H23   | -0,016788355        | 0,310933182        | 0        | N.A.       | 0 |
| SHC3          | -0,016808668        | -0,029454426       | 0        | N.A.       | 0 |
| RP11-262H14   | -0,016810356        | -0,178673096       | 0        | N.A.       | 0 |
| MMP12         | -0,016849332        | 0,034788371        | 0        | N.A.       | 0 |
| ZFP90         | -0,016876224        | 0,064490943        | 0        | N.A.       | 0 |
| ZBTB32        | -0,016895268        |                    | 0        | N.A.       | 0 |
| CTD-2049O4    | -0,016897774        | -0,207129777       | 0        | N.A.       | 0 |
| SCN11A        | -0,016904454        |                    | 0        | N.A.       | 0 |
| CMYA5         | -0,01691461         | 0,054335651        | 0        | N.A.       | 0 |
| KCNE5         | -0,016917058        |                    | 0        | N.A.       | 0 |
| LRRC49        | -0,016918274        | 0,009621985        | 0        | N.A.       | 0 |
| LINS          | -0,016950385        | -0,050818542       | 0        | N.A.       | 0 |
| RP11-96O20.   | -0,016975259        | -0,07075999        | 0        | N.A.       | 0 |
| RP11-452F19   | -0,016975916        | 0,060281435        | 0        | N.A.       | 0 |
| DDIT4L        | -0,017011138        |                    | 0        | N.A.       | 0 |

|              |              |              |   |      |   |
|--------------|--------------|--------------|---|------|---|
| MSTN         | -0,017036838 | 0,160872973  | 0 | N.A. | 0 |
| RBP1         | -0,017128945 | 0,142729967  | 0 | N.A. | 0 |
| SOX7         | -0,017149019 | -0,023010259 | 0 | N.A. | 0 |
| ZNF879       | -0,017157075 | -0,11781442  | 0 | N.A. | 0 |
| SARS         | -0,017176207 | 0,255837968  | 0 | N.A. | 0 |
| RP11-363J20  | -0,017200389 | 0,044852133  | 0 | N.A. | 0 |
| PHF20L1      | -0,017232489 | 0,257767907  | 0 | N.A. | 0 |
| CYS1         | -0,017266487 | -0,146865157 | 0 | N.A. | 0 |
| RAD51AP2     | -0,017267693 | -0,052465036 | 0 | N.A. | 0 |
| AC012074.2   | -0,017282724 |              | 0 | N.A. | 0 |
| TBCK         | -0,017311759 | 0,028925807  | 0 | N.A. | 0 |
| RP11-848P1.  | -0,017341586 | 0,098115869  | 0 | N.A. | 0 |
| MAN1A1       | -0,017381446 | 0,191796092  | 0 | N.A. | 0 |
| RP11-588H23  | -0,017401895 |              | 0 | N.A. | 0 |
| RP11-293P20  | -0,01740567  | -0,053724054 | 0 | N.A. | 0 |
| RP11-190C22  | -0,017423247 |              | 0 | N.A. | 0 |
| SPIN2A       | -0,017452541 | -0,110512158 | 0 | N.A. | 0 |
| CLHC1        | -0,017452736 | 0,229403909  | 0 | N.A. | 0 |
| RP11-343H5.  | -0,017463449 | -0,027102454 | 0 | N.A. | 0 |
| ACTG2        | -0,017488239 | -0,318045556 | 0 | N.A. | 0 |
| KLRC1        | -0,01750193  | 0,127658525  | 0 | N.A. | 0 |
| SRRM2        | -0,017512918 | 0,455498019  | 0 | N.A. | 0 |
| MANEA        | -0,017514268 | 0,14298134   | 0 | N.A. | 0 |
| RP11-646I6.5 | -0,017524046 | -0,085047183 | 0 | N.A. | 0 |
| FCGRT        | -0,017542348 | -0,004624826 | 0 | N.A. | 0 |
| MAP6         | -0,017588426 |              | 0 | N.A. | 0 |
| AQP1         | -0,017630832 | -0,190338493 | 0 | N.A. | 0 |
| INPP5J       | -0,017658294 | -0,133118406 | 0 | N.A. | 0 |
| GALNT8       | -0,01767946  | -0,046449132 | 0 | N.A. | 0 |
| SCARF2       | -0,017693701 | 0,024403105  | 0 | N.A. | 0 |
| RSF1         | -0,017706664 | 0,372753559  | 0 | N.A. | 0 |
| RP11-672L10  | -0,017712808 | 0,025484908  | 0 | N.A. | 0 |
| TPM3         | -0,017735043 | -0,067755132 | 0 | N.A. | 0 |

|              |              |              |   |      |   |
|--------------|--------------|--------------|---|------|---|
| PPP3CB       | -0,017745904 | -0,121050054 | 0 | N.A. | 0 |
| WDR20        | -0,017766205 | 0,015332099  | 0 | N.A. | 0 |
| CTBP1        | -0,017775184 | 0,353095232  | 0 | N.A. | 0 |
| CTD-2145A24  | -0,017812333 | -0,007319528 | 0 | N.A. | 0 |
| ELL3         | -0,017840937 | -0,112419225 | 0 | N.A. | 0 |
| BOLA2B       | -0,017846914 | -0,188128897 | 0 | N.A. | 0 |
| MYO3B        | -0,017852197 | 0,093824842  | 0 | N.A. | 0 |
| SLC22A5      | -0,017889042 | 0,152871611  | 0 | N.A. | 0 |
| AC012360.6   | -0,017890124 |              | 0 | N.A. | 0 |
| RP11-83J21.3 | -0,017904654 | 0,114495005  | 0 | N.A. | 0 |
| CXorf36      | -0,017912261 | 0,026816542  | 0 | N.A. | 0 |
| RP11-470P21  | -0,017938923 | -0,021461349 | 0 | N.A. | 0 |
| LIMS2        | -0,017962156 | -0,172556295 | 0 | N.A. | 0 |
| MANBA        | -0,017970081 | 0,262447905  | 0 | N.A. | 0 |
| CRAT         | -0,018007252 | 0,040659971  | 0 | N.A. | 0 |
| RP11-574F21  | -0,018031181 | -0,000801007 | 0 | N.A. | 0 |
| NAT1         | -0,018033322 | 0,162865783  | 0 | N.A. | 0 |
| KCNRG        | -0,018039306 | 0,09203234   | 0 | N.A. | 0 |
| SLC4A1       | -0,01808999  | 0,06358389   | 0 | N.A. | 0 |
| IGHV4-39     | -0,018095107 | -0,259427332 | 0 | N.A. | 0 |
| RP11-297A16  | -0,018118705 |              | 0 | N.A. | 0 |
| C10orf55     | -0,018124112 |              | 0 | N.A. | 0 |
| PMCH         | -0,018204762 |              | 0 | N.A. | 0 |
| HSPBAP1      | -0,018232288 | 0,215454315  | 0 | N.A. | 0 |
| CTD-2001C12  | -0,018251785 | -0,019183416 | 0 | N.A. | 0 |
| OXER1        | -0,018252099 | -0,026660926 | 0 | N.A. | 0 |
| ZNF615       | -0,018262618 | -0,107807376 | 0 | N.A. | 0 |
| ZNF470       | -0,018381206 | -0,101817164 | 0 | N.A. | 0 |
| CD164L2      | -0,01840907  | -0,123629058 | 0 | N.A. | 0 |
| CTC-203F4.2  | -0,018469162 | -0,145993611 | 0 | N.A. | 0 |
| LPPR2        | -0,0184807   | 0,136112554  | 0 | N.A. | 0 |
| PNLDC1       | -0,018525854 | 0,264190829  | 0 | N.A. | 0 |
| SLC29A3      | -0,018542427 | 0,24833999   | 0 | N.A. | 0 |

|             |              |              |   |      |   |
|-------------|--------------|--------------|---|------|---|
| PRB1        | -0,018576574 | 0,126120144  | 0 | N.A. | 0 |
| RP11-806H10 | -0,018581254 | 0,053121578  | 0 | N.A. | 0 |
| UBE2O       | -0,018616796 | 0,038648533  | 0 | N.A. | 0 |
| RP11-435O5  | -0,018622866 | -0,033974411 | 0 | N.A. | 0 |
| PLA2G15     | -0,018638148 | 0,122499403  | 0 | N.A. | 0 |
| SQLE        | -0,01864123  | 0,434911666  | 0 | N.A. | 0 |
| PCDHB16     | -0,018658317 | -0,229137408 | 0 | N.A. | 0 |
| LSM12       | -0,018693936 | -0,132499117 | 0 | N.A. | 0 |
| ESPN        | -0,018707759 | -0,049096005 | 0 | N.A. | 0 |
| XCL1        | -0,018709122 | 0,085978502  | 0 | N.A. | 0 |
| FLJ13224    | -0,018715963 | 0,120057473  | 0 | N.A. | 0 |
| FAM129C     | -0,018742592 | -0,136012552 | 0 | N.A. | 0 |
| ZNF354B     | -0,018760523 | -0,108757768 | 0 | N.A. | 0 |
| ZNF223      | -0,018805145 | 0,014014629  | 0 | N.A. | 0 |
| BBIP1       | -0,01882407  | -0,056029118 | 0 | N.A. | 0 |
| LRRC25      | -0,018830417 |              | 0 | N.A. | 0 |
| ZNF582      | -0,018835234 |              | 0 | N.A. | 0 |
| RSPH9       | -0,018898409 | 0,033154308  | 0 | N.A. | 0 |
| CD74        | -0,01894483  | -0,40316035  | 0 | N.A. | 0 |
| DCDC2       | -0,018951692 | -0,153913468 | 0 | N.A. | 0 |
| KHDRBS3     | -0,018968951 | 0,03991442   | 0 | N.A. | 0 |
| VCPKMT      | -0,018973613 | -0,11528089  | 0 | N.A. | 0 |
| AFAP1L1     | -0,018975417 |              | 0 | N.A. | 0 |
| RP11-730K11 | -0,019016274 | 0,195489296  | 0 | N.A. | 0 |
| RP11-403P17 | -0,019025337 | -0,16655498  | 0 | N.A. | 0 |
| CDCP2       | -0,019032815 |              | 0 | N.A. | 0 |
| PIGO        | -0,019098927 | 0,27564957   | 0 | N.A. | 0 |
| FAM46B      | -0,019110102 | 0,134176093  | 0 | N.A. | 0 |
| CTD-3088G3  | -0,019121566 | 0,045973901  | 0 | N.A. | 0 |
| PRLR        | -0,019174586 | 0,033390903  | 0 | N.A. | 0 |
| TERC        | -0,019243934 | -0,07773891  | 0 | N.A. | 0 |
| ZNF581      | -0,019268758 | -0,0048543   | 0 | N.A. | 0 |
| LGALS4      | -0,019361682 | 0,046451313  | 0 | N.A. | 0 |

|             |              |              |   |      |   |
|-------------|--------------|--------------|---|------|---|
| NANOS1      | -0,01936374  | 0,034351128  | 0 | N.A. | 0 |
| PIAS2       | -0,019365209 | -0,088363442 | 0 | N.A. | 0 |
| LIFR        | -0,019382341 | 0,194611799  | 0 | N.A. | 0 |
| ANO10       | -0,019396071 | -0,055436748 | 0 | N.A. | 0 |
| HIST2H3D    | -0,01942091  | 0,058940154  | 0 | N.A. | 0 |
| C10orf128   | -0,019426945 | -0,283534921 | 0 | N.A. | 0 |
| LMF1        | -0,019466664 | 0,338039731  | 0 | N.A. | 0 |
| HCG15       | -0,019471802 | -0,043726642 | 0 | N.A. | 0 |
| RP11-727F15 | -0,019489491 | 0,119432594  | 0 | N.A. | 0 |
| SCG3        | -0,019546729 | -0,120898451 | 0 | N.A. | 0 |
| FRMD4A      | -0,019555342 | -0,097179567 | 0 | N.A. | 0 |
| DNAJC27     | -0,019581008 | -0,032699337 | 0 | N.A. | 0 |
| ACY3        | -0,01961139  | -0,178557825 | 0 | N.A. | 0 |
| RP5-967N21  | -0,019611764 | -0,072448303 | 0 | N.A. | 0 |
| RP11-47L3.1 | -0,019624297 | -0,06844733  | 0 | N.A. | 0 |
| RP5-1073O3  | -0,019624297 |              | 0 | N.A. | 0 |
| LINC00944   | -0,019665235 | 0,203144604  | 0 | N.A. | 0 |
| RP11-380D23 | -0,019705385 | -0,144466459 | 0 | N.A. | 0 |
| KCNG3       | -0,019706793 |              | 0 | N.A. | 0 |
| RP11-1112C1 | -0,019728693 | 0,2878873    | 0 | N.A. | 0 |
| ZNF410      | -0,019736915 | -0,000625238 | 0 | N.A. | 0 |
| GPM6B       | -0,01974735  | 0,022757886  | 0 | N.A. | 0 |
| ADAMTS8     | -0,019770469 |              | 0 | N.A. | 0 |
| RP11-336K24 | -0,019773836 | 0,068779859  | 0 | N.A. | 0 |
| MESTIT1     | -0,019793659 | -0,027692683 | 0 | N.A. | 0 |
| CARD16      | -0,019845961 | -0,168130814 | 0 | N.A. | 0 |
| CHMP3       | -0,019847276 | 0,256324943  | 0 | N.A. | 0 |
| HPCAL1      | -0,019848857 | 0,178608308  | 0 | N.A. | 0 |
| NEK9        | -0,019867001 | 0,265812177  | 0 | N.A. | 0 |
| REEP6       | -0,019881051 | 0,264980114  | 0 | N.A. | 0 |
| AHCTF1      | -0,019881716 | 0,035876296  | 0 | N.A. | 0 |
| PNKP        | -0,019888757 | 0,041053024  | 0 | N.A. | 0 |
| LRP2BP      | -0,019959472 | -0,003086988 | 0 | N.A. | 0 |

|             |              |              |   |      |   |
|-------------|--------------|--------------|---|------|---|
| RP11-410N8. | -0,019981348 |              | 0 | N.A. | 0 |
| IGHM        | -0,019982646 | -0,073395501 | 0 | N.A. | 0 |
| CLK4        | -0,020000291 | 0,185937843  | 0 | N.A. | 0 |
| AC138969.4  | -0,02002092  | 0,080666553  | 0 | N.A. | 0 |
| TIGD6       | -0,020029111 | -0,02694023  | 0 | N.A. | 0 |
| HP1BP3      | -0,020038605 | 0,070376143  | 0 | N.A. | 0 |
| SNAP25      | -0,020045532 |              | 0 | N.A. | 0 |
| HCG9        | -0,020056955 | 0,187576631  | 0 | N.A. | 0 |
| STXBP5-AS1  | -0,020078332 | 0,353446737  | 0 | N.A. | 0 |
| RP11-7O11.3 | -0,02009732  | -0,087726259 | 0 | N.A. | 0 |
| RAET1E-AS1  | -0,020148011 | 0,204475242  | 0 | N.A. | 0 |
| MLLT1       | -0,020186559 | 0,024067954  | 0 | N.A. | 0 |
| ABCC2       | -0,020193371 | 0,129388485  | 0 | N.A. | 0 |
| ROR2        | -0,020224147 | 0,052518082  | 0 | N.A. | 0 |
| PARVA       | -0,020229496 | -0,113057803 | 0 | N.A. | 0 |
| C1QL4       | -0,020235447 |              | 0 | N.A. | 0 |
| FSTL4       | -0,020271574 | -0,072075395 | 0 | N.A. | 0 |
| TLCD1       | -0,020272425 | 0,182780266  | 0 | N.A. | 0 |
| ACVR2B      | -0,020289942 | 0,124135564  | 0 | N.A. | 0 |
| ZNF484      | -0,020293068 | -0,106633046 | 0 | N.A. | 0 |
| TMEM42      | -0,020313623 | -0,0511508   | 0 | N.A. | 0 |
| RP11-649A18 | -0,020328042 |              | 0 | N.A. | 0 |
| KLRC2       | -0,020344816 |              | 0 | N.A. | 0 |
| RP1-153G14. | -0,020351838 | 0,096287134  | 0 | N.A. | 0 |
| ZNF175      | -0,020450897 | 0,176194511  | 0 | N.A. | 0 |
| RP11-98D18. | -0,020507537 |              | 0 | N.A. | 0 |
| RP11-296I10 | -0,020533085 | 0,141217245  | 0 | N.A. | 0 |
| AC005618.6  | -0,020551909 | 0,284080932  | 0 | N.A. | 0 |
| AC006116.17 | -0,020593985 | 0,001788808  | 0 | N.A. | 0 |
| NRXN2       | -0,020598718 | 0,4106549    | 0 | N.A. | 0 |
| FMNL1       | -0,020611672 | -0,165045921 | 0 | N.A. | 0 |
| FAM114A2    | -0,020612312 | 0,083583631  | 0 | N.A. | 0 |
| TBX2        | -0,020617053 |              | 0 | N.A. | 0 |

|              |              |              |   |      |   |
|--------------|--------------|--------------|---|------|---|
| RP11-506024  | -0,020673901 |              | 0 | N.A. | 0 |
| NLGN1        | -0,020680171 |              | 0 | N.A. | 0 |
| C9orf171     | -0,020736386 |              | 0 | N.A. | 0 |
| CCDC136      | -0,020739688 | -0,051933323 | 0 | N.A. | 0 |
| RP11-930P14  | -0,020745573 | -0,052485943 | 0 | N.A. | 0 |
| CCDC113      | -0,020778123 | -0,178320359 | 0 | N.A. | 0 |
| TPST2        | -0,020820778 | 0,235091629  | 0 | N.A. | 0 |
| TPSAB1       | -0,020851591 | -0,128487982 | 0 | N.A. | 0 |
| NUDT17       | -0,020879186 | -0,066522265 | 0 | N.A. | 0 |
| LINC01144    | -0,020882559 | -0,049720071 | 0 | N.A. | 0 |
| TNFRSF25     | -0,020886345 | 0,31669777   | 0 | N.A. | 0 |
| UBE2D3       | -0,020905792 | -0,182992082 | 0 | N.A. | 0 |
| SOX8         | -0,020919625 | 0,033167698  | 0 | N.A. | 0 |
| STOML3       | -0,020922579 | -0,001748178 | 0 | N.A. | 0 |
| C9orf50      | -0,020960748 |              | 0 | N.A. | 0 |
| SNTN         | -0,020975559 | -0,307683085 | 0 | N.A. | 0 |
| URB2         | -0,020978806 | -0,167222377 | 0 | N.A. | 0 |
| CTD-2516F10  | -0,021008552 |              | 0 | N.A. | 0 |
| SLC4A2       | -0,021086659 | 0,227748797  | 0 | N.A. | 0 |
| DNAL1        | -0,021093637 | -0,011932199 | 0 | N.A. | 0 |
| RP6-91H8.3   | -0,021129515 |              | 0 | N.A. | 0 |
| MFHAS1       | -0,021160374 | 0,253047096  | 0 | N.A. | 0 |
| COL11A1      | -0,021191227 | -0,161964078 | 0 | N.A. | 0 |
| TMEM8B       | -0,021238559 | 0,071539122  | 0 | N.A. | 0 |
| AGA          | -0,021238879 | -0,234942465 | 0 | N.A. | 0 |
| RP4-655J12.4 | -0,021239763 | 0,187531127  | 0 | N.A. | 0 |
| PARP11       | -0,021243959 | 0,098883014  | 0 | N.A. | 0 |
| EIF3J-AS1    | -0,021268788 | -0,053289307 | 0 | N.A. | 0 |
| LINC00870    | -0,021304464 |              | 0 | N.A. | 0 |
| C10orf91     | -0,021331841 | 0,113246448  | 0 | N.A. | 0 |
| KCNQ1        | -0,021357218 | 0,114539956  | 0 | N.A. | 0 |
| ZNF629       | -0,02137676  | -0,033280102 | 0 | N.A. | 0 |
| NSD1         | -0,0214061   | 0,171555842  | 0 | N.A. | 0 |

|             |              |              |   |      |   |
|-------------|--------------|--------------|---|------|---|
| SDSL        | -0,021414209 | -0,208053063 | 0 | N.A. | 0 |
| NIPSNAP3B   | -0,021429998 |              | 0 | N.A. | 0 |
| TTL         | -0,021450398 | 0,376027831  | 0 | N.A. | 0 |
| CRTC3-AS1   | -0,021455903 | -0,148377162 | 0 | N.A. | 0 |
| RP5-821D11. | -0,021472554 | 0,006939964  | 0 | N.A. | 0 |
| RP11-415C15 | -0,021475156 |              | 0 | N.A. | 0 |
| AC074289.1  | -0,021495003 | 0,230315758  | 0 | N.A. | 0 |
| CCDC12      | -0,021496371 | -0,129034003 | 0 | N.A. | 0 |
| ADRA2C      | -0,021509575 | 0,002983667  | 0 | N.A. | 0 |
| COLQ        | -0,021535752 |              | 0 | N.A. | 0 |
| CLIP1-AS1   | -0,021542462 | 0,196959151  | 0 | N.A. | 0 |
| FAAH2       | -0,021547588 | 0,187561736  | 0 | N.A. | 0 |
| ASB16       | -0,021595497 | -0,067390666 | 0 | N.A. | 0 |
| NOP9        | -0,021598501 | -0,059990169 | 0 | N.A. | 0 |
| ZNF433      | -0,021602548 | 0,135902587  | 0 | N.A. | 0 |
| RP11-1020A1 | -0,021613733 |              | 0 | N.A. | 0 |
| UBE2F       | -0,021620894 | 0,219356414  | 0 | N.A. | 0 |
| UBAP1L      | -0,021665012 | 0,078352409  | 0 | N.A. | 0 |
| SIGLEC10    | -0,021692481 | -0,07410037  | 0 | N.A. | 0 |
| E4F1        | -0,021733114 | 0,181634798  | 0 | N.A. | 0 |
| AC020571.3  | -0,021737964 | 0,140347743  | 0 | N.A. | 0 |
| RP5-864K19. | -0,02176749  | 0,08138658   | 0 | N.A. | 0 |
| LINC01344   | -0,021816895 |              | 0 | N.A. | 0 |
| GPR20       | -0,021827973 | 0,14117977   | 0 | N.A. | 0 |
| CECR1       | -0,021848261 | -0,145637746 | 0 | N.A. | 0 |
| RP11-131N11 | -0,021876505 |              | 0 | N.A. | 0 |
| RP11-84G21. | -0,021878109 | -0,045234224 | 0 | N.A. | 0 |
| PIAS4       | -0,021891209 | -0,076006125 | 0 | N.A. | 0 |
| MOCS1       | -0,021929554 | 0,081196452  | 0 | N.A. | 0 |
| PI16        | -0,021947993 |              | 0 | N.A. | 0 |
| YPEL4       | -0,02196756  | 0,063246976  | 0 | N.A. | 0 |
| CTC-523E23. | -0,022071132 | -0,240439153 | 0 | N.A. | 0 |
| AC079354.5  | -0,022085664 | 0,297961466  | 0 | N.A. | 0 |



|             |              |              |   |      |   |
|-------------|--------------|--------------|---|------|---|
| RP11-358N2  | -0,022127143 | -0,012781477 | 0 | N.A. | 0 |
| PBX3        | -0,022175019 | -0,020448921 | 0 | N.A. | 0 |
| ZNF408      | -0,022181023 | -0,139555898 | 0 | N.A. | 0 |
| GZMK        | -0,022190555 | -0,157934345 | 0 | N.A. | 0 |
| ZMYND11     | -0,022228534 | -0,166314097 | 0 | N.A. | 0 |
| C22orf29    | -0,022286259 | -0,096880023 | 0 | N.A. | 0 |
| AC006129.2  | -0,022301654 | -0,248912471 | 0 | N.A. | 0 |
| EEF1A2      | -0,022307787 | -0,02164579  | 0 | N.A. | 0 |
| AP4B1       | -0,022317128 | -0,230844965 | 0 | N.A. | 0 |
| HEYL        | -0,02233345  | 0,152098045  | 0 | N.A. | 0 |
| SPACA4      | -0,022340554 | 0,135199055  | 0 | N.A. | 0 |
| CNEP1R1     | -0,022404763 | -0,233271027 | 0 | N.A. | 0 |
| NUTM2A-AS1  | -0,022438837 | -0,140696697 | 0 | N.A. | 0 |
| ZUFSP       | -0,022484245 | -0,124553152 | 0 | N.A. | 0 |
| LLOXNC01-23 | -0,022499498 | 0,063027311  | 0 | N.A. | 0 |
| FAM166A     | -0,022509461 |              | 0 | N.A. | 0 |
| ZNF700      | -0,022523737 | -0,05197372  | 0 | N.A. | 0 |
| ARAF        | -0,022557364 | 0,126480903  | 0 | N.A. | 0 |
| RP11-44N11  | -0,022557661 | 0,03964064   | 0 | N.A. | 0 |
| SLC10A7     | -0,022581339 | -0,122843258 | 0 | N.A. | 0 |
| SLC12A5     | -0,022613535 | -0,019793728 | 0 | N.A. | 0 |
| AF213884.2  | -0,022615544 | -0,036603453 | 0 | N.A. | 0 |
| KB-1732A1.1 | -0,022650636 | 0,016848726  | 0 | N.A. | 0 |
| AIDA        | -0,022663289 | -0,056936466 | 0 | N.A. | 0 |
| ZBED3-AS1   | -0,022689644 | 0,050472017  | 0 | N.A. | 0 |
| RP5-1098D14 | -0,022818172 |              | 0 | N.A. | 0 |
| RP11-338K17 | -0,022832825 |              | 0 | N.A. | 0 |
| DBF4B       | -0,02284441  | -0,021937617 | 0 | N.A. | 0 |
| RP11-737O24 | -0,022888927 | 0,330064619  | 0 | N.A. | 0 |
| LCE1E       | -0,022907259 | -0,226429061 | 0 | N.A. | 0 |
| RGS7        | -0,022918143 |              | 0 | N.A. | 0 |
| RP5-1116H23 | -0,022953987 |              | 0 | N.A. | 0 |
| RP11-27N21  | -0,022959654 | 0,25474024   | 0 | N.A. | 0 |

|             |              |              |   |      |   |
|-------------|--------------|--------------|---|------|---|
| SCAF4       | -0,02297243  | 0,149217704  | 0 | N.A. | 0 |
| FEV         | -0,022976915 |              | 0 | N.A. | 0 |
| RP11-131L12 | -0,022982623 | 0,071215763  | 0 | N.A. | 0 |
| DRP2        | -0,023017563 |              | 0 | N.A. | 0 |
| CTD-2292P10 | -0,023045665 |              | 0 | N.A. | 0 |
| C17orf70    | -0,023045979 | 0,092046027  | 0 | N.A. | 0 |
| CYP2U1      | -0,023047824 | 0,034117293  | 0 | N.A. | 0 |
| RP11-554E23 | -0,023059022 |              | 0 | N.A. | 0 |
| PLXNB3      | -0,023077481 | 0,353294547  | 0 | N.A. | 0 |
| RP1-193H18. | -0,023087028 | 0,102926754  | 0 | N.A. | 0 |
| DMRTA2      | -0,023093185 | -0,076140422 | 0 | N.A. | 0 |
| P4HTM       | -0,023099134 | 0,314106653  | 0 | N.A. | 0 |
| MEF2C       | -0,023134908 | -0,258890732 | 0 | N.A. | 0 |
| IGHV1-24    | -0,023169673 |              | 0 | N.A. | 0 |
| CDH13       | -0,023179884 | -0,157402119 | 0 | N.A. | 0 |
| RP11-575A19 | -0,023179887 | 0,084424151  | 0 | N.A. | 0 |
| RP11-297P16 | -0,023190766 | 0,174723608  | 0 | N.A. | 0 |
| ITGA2B      | -0,023200541 |              | 0 | N.A. | 0 |
| EMC7        | -0,023204316 | 0,432082585  | 0 | N.A. | 0 |
| BST1        | -0,023248972 | -0,019183488 | 0 | N.A. | 0 |
| SLC25A27    | -0,023250778 | -0,113827971 | 0 | N.A. | 0 |
| PGM1        | -0,023253142 | 0,054239785  | 0 | N.A. | 0 |
| RP11-550A5. | -0,023258244 | 0,143776263  | 0 | N.A. | 0 |
| PTPDC1      | -0,023284888 | -0,090738898 | 0 | N.A. | 0 |
| COL9A3      | -0,023293803 | -0,00817089  | 0 | N.A. | 0 |
| CTB-113P19. | -0,023328701 | -0,298732054 | 0 | N.A. | 0 |
| RP11-713M1  | -0,023341515 | 0,173358712  | 0 | N.A. | 0 |
| ST18        | -0,023358918 | 0,06564083   | 0 | N.A. | 0 |
| LINC00471   | -0,023402218 | -0,060015842 | 0 | N.A. | 0 |
| L3MBTL3     | -0,023407801 | 0,039275309  | 0 | N.A. | 0 |
| TSPAN32     | -0,023458139 | -0,135697672 | 0 | N.A. | 0 |
| SCN1B       | -0,023478098 | 0,027783657  | 0 | N.A. | 0 |
| PDPR        | -0,023480974 | 0,14553157   | 0 | N.A. | 0 |

|              |              |              |   |      |   |
|--------------|--------------|--------------|---|------|---|
| RP11-603J24  | -0,023483722 |              | 0 | N.A. | 0 |
| RP11-1C8.5   | -0,023486643 | -0,122068253 | 0 | N.A. | 0 |
| RNU11        | -0,023520745 | 0,006507364  | 0 | N.A. | 0 |
| AF001548.5   | -0,023524882 | -0,283736995 | 0 | N.A. | 0 |
| BTBD11       | -0,023559097 | 0,229652892  | 0 | N.A. | 0 |
| TOMM20L      | -0,023563385 | 0,051190873  | 0 | N.A. | 0 |
| AC084809.3   | -0,023572059 | 0,06358727   | 0 | N.A. | 0 |
| TRMT1L       | -0,023589554 | -0,11121703  | 0 | N.A. | 0 |
| GARNL3       | -0,02362409  | 0,112929154  | 0 | N.A. | 0 |
| CCSER2       | -0,023627417 | 0,075832064  | 0 | N.A. | 0 |
| INVS         | -0,023634    | -0,134521238 | 0 | N.A. | 0 |
| CHRNA3       | -0,023646662 |              | 0 | N.A. | 0 |
| MIR497HG     | -0,023657267 | -0,010023148 | 0 | N.A. | 0 |
| LBP          | -0,023673596 | -0,148035039 | 0 | N.A. | 0 |
| COPB2        | -0,023762062 | 0,104036837  | 0 | N.A. | 0 |
| LA16c-395F1  | -0,023767259 | -0,097889543 | 0 | N.A. | 0 |
| RP11-276E15  | -0,02378788  | 0,108529325  | 0 | N.A. | 0 |
| ZNF256       | -0,023788864 | -0,246323688 | 0 | N.A. | 0 |
| ALG10        | -0,02379486  | -0,029342102 | 0 | N.A. | 0 |
| SLC17A7      | -0,023808169 |              | 0 | N.A. | 0 |
| PAN3         | -0,023808687 | 0,069075249  | 0 | N.A. | 0 |
| CPXM2        | -0,023857819 | -0,214156296 | 0 | N.A. | 0 |
| GALNT12      | -0,023881045 | 0,350391305  | 0 | N.A. | 0 |
| OR51E1       | -0,023891468 | -0,085298554 | 0 | N.A. | 0 |
| CDR1         | -0,023945387 | -0,020098892 | 0 | N.A. | 0 |
| GOLGA6L22    | -0,02396402  | -0,148035039 | 0 | N.A. | 0 |
| RP11-615I2.2 | -0,024019937 | 0,116701133  | 0 | N.A. | 0 |
| RP3-402G11.  | -0,024029305 | -0,118430005 | 0 | N.A. | 0 |
| AC000068.5   | -0,024078525 | 0,137404292  | 0 | N.A. | 0 |
| VIM-AS1      | -0,024091018 | 0,129621917  | 0 | N.A. | 0 |
| CTD-2012K14  | -0,024101231 | -0,168122293 | 0 | N.A. | 0 |
| AC092580.4   | -0,024112537 | 0,077863219  | 0 | N.A. | 0 |
| AC007163.3   | -0,02412489  |              | 0 | N.A. | 0 |

|              |              |              |   |      |   |
|--------------|--------------|--------------|---|------|---|
| RP11-65J3.14 | -0,02413179  | -0,085823028 | 0 | N.A. | 0 |
| PCMTD2       | -0,024145653 | -0,135333992 | 0 | N.A. | 0 |
| MSS51        | -0,024149571 | 0,144702638  | 0 | N.A. | 0 |
| GBX2         | -0,024177515 |              | 0 | N.A. | 0 |
| AC025171.1   | -0,024177866 | -0,191851707 | 0 | N.A. | 0 |
| HOXC8        | -0,024186485 | 0,079515914  | 0 | N.A. | 0 |
| TTC36        | -0,024202669 | -0,132076887 | 0 | N.A. | 0 |
| RBM43        | -0,024205151 | -0,357306748 | 0 | N.A. | 0 |
| SCAMP1-AS1   | -0,024225752 | -0,056927793 | 0 | N.A. | 0 |
| SFRP1        | -0,024232851 |              | 0 | N.A. | 0 |
| NHLRC1       | -0,02427018  | -0,358526753 | 0 | N.A. | 0 |
| ACAA1        | -0,024275904 | 0,30647259   | 0 | N.A. | 0 |
| CFAP57       | -0,024290199 |              | 0 | N.A. | 0 |
| DES11        | -0,024304393 | 0,154277453  | 0 | N.A. | 0 |
| PLD6         | -0,024339285 | -0,096726806 | 0 | N.A. | 0 |
| KIAA1024     | -0,024411334 | 0,289251024  | 0 | N.A. | 0 |
| MATN1-AS1    | -0,024424852 | -0,070121354 | 0 | N.A. | 0 |
| AKAP3        | -0,024426893 | 0,091524878  | 0 | N.A. | 0 |
| CDAN1        | -0,024430558 | -0,202869309 | 0 | N.A. | 0 |
| ZNF503-AS1   | -0,02443237  | -0,060913302 | 0 | N.A. | 0 |
| CTB-129P6.1  | -0,024458027 |              | 0 | N.A. | 0 |
| VAMP1        | -0,024461166 | -0,060867231 | 0 | N.A. | 0 |
| RP11-105C19  | -0,024486464 |              | 0 | N.A. | 0 |
| PIGS         | -0,024497888 | 0,383726797  | 0 | N.A. | 0 |
| RP11-867G23  | -0,024498514 | -0,348136208 | 0 | N.A. | 0 |
| GALNS        | -0,024544196 | 0,18242678   | 0 | N.A. | 0 |
| NEUROD1      | -0,024555112 |              | 0 | N.A. | 0 |
| TERT         | -0,024595511 | 0,062096426  | 0 | N.A. | 0 |
| RP3-337D23   | -0,024622549 |              | 0 | N.A. | 0 |
| RASSF4       | -0,024637126 | -0,155113751 | 0 | N.A. | 0 |
| CCP110       | -0,024657032 | 0,354787677  | 0 | N.A. | 0 |
| SEC61A2      | -0,024677139 | -0,017497888 | 0 | N.A. | 0 |
| UCN          | -0,024689897 | -0,165973761 | 0 | N.A. | 0 |

|              |              |              |   |      |   |
|--------------|--------------|--------------|---|------|---|
| RP11-110I1.1 | -0,024711289 | 0,256972614  | 0 | N.A. | 0 |
| TUBE1        | -0,024719317 | -0,002811535 | 0 | N.A. | 0 |
| FAM127C      | -0,024725526 | -0,111863147 | 0 | N.A. | 0 |
| RP11-705O1.  | -0,024738089 | 0,1625939    | 0 | N.A. | 0 |
| TOP3A        | -0,024744816 | 0,118319558  | 0 | N.A. | 0 |
| PCDHGB6      | -0,024754483 | 0,042909635  | 0 | N.A. | 0 |
| MSL2         | -0,02479404  | -0,058487332 | 0 | N.A. | 0 |
| ARID4B       | -0,024836941 | 0,38760809   | 0 | N.A. | 0 |
| CTD-2095E4.  | -0,024850668 | 0,296302236  | 0 | N.A. | 0 |
| PEX11A       | -0,02485308  | -0,177565298 | 0 | N.A. | 0 |
| LINC00243    | -0,024860521 |              | 0 | N.A. | 0 |
| PPP1R12A     | -0,024866908 | 0,337137842  | 0 | N.A. | 0 |
| MAK          | -0,024870963 | -0,18152977  | 0 | N.A. | 0 |
| LMAN1        | -0,024894197 | -0,272354403 | 0 | N.A. | 0 |
| RNF169       | -0,024909341 | 0,007429394  | 0 | N.A. | 0 |
| DSTYK        | -0,024928146 | 0,134536691  | 0 | N.A. | 0 |
| TAT-AS1      | -0,024939585 | -0,24592771  | 0 | N.A. | 0 |
| ZNF7         | -0,02494522  | 0,068504499  | 0 | N.A. | 0 |
| LINC01431    | -0,024954823 | 0,112691577  | 0 | N.A. | 0 |
| IGKV2-30     | -0,024975599 | -0,238373313 | 0 | N.A. | 0 |
| MEIG1        | -0,024978593 | -0,139582944 | 0 | N.A. | 0 |
| AC068282.3   | -0,025020344 | 0,068566601  | 0 | N.A. | 0 |
| TNNI3K       | -0,025044346 | -0,010422763 | 0 | N.A. | 0 |
| CD14         | -0,025049127 | -0,298264478 | 0 | N.A. | 0 |
| RASGRP1      | -0,025050338 | 0,032673208  | 0 | N.A. | 0 |
| AGBL5-AS1    | -0,025070786 | -0,268890694 | 0 | N.A. | 0 |
| SCAI         | -0,025086783 | -0,263343524 | 0 | N.A. | 0 |
| GPR4         | -0,025095185 | 0,061371692  | 0 | N.A. | 0 |
| CHST8        | -0,025129938 |              | 0 | N.A. | 0 |
| RP11-476H16  | -0,025168978 | -0,02411316  | 0 | N.A. | 0 |
| ANKRD31      | -0,025247275 | -0,076259698 | 0 | N.A. | 0 |
| IGHG1        | -0,025299338 | -0,18157295  | 0 | N.A. | 0 |
| GSTM2        | -0,025363583 | -0,058781245 | 0 | N.A. | 0 |

|              |              |              |   |      |   |
|--------------|--------------|--------------|---|------|---|
| AL133493.2   | -0,025382491 | 0,1474486    | 0 | N.A. | 0 |
| DES          | -0,02538675  | -0,265310667 | 0 | N.A. | 0 |
| LINC01060    | -0,025391633 |              | 0 | N.A. | 0 |
| RP11-121M2   | -0,025400535 | 0,001841037  | 0 | N.A. | 0 |
| RNF41        | -0,025436122 | -0,141241993 | 0 | N.A. | 0 |
| NFE2L2       | -0,02543865  | 0,264604082  | 0 | N.A. | 0 |
| HK1          | -0,025482295 | 0,030321832  | 0 | N.A. | 0 |
| CELF2        | -0,025483297 | -0,21117593  | 0 | N.A. | 0 |
| CD300LF      | -0,025498306 |              | 0 | N.A. | 0 |
| TIMM23B      | -0,025506152 | 0,156067377  | 0 | N.A. | 0 |
| CTD-2033D1   | -0,025561296 |              | 0 | N.A. | 0 |
| LINC00654    | -0,025564981 | -0,205104534 | 0 | N.A. | 0 |
| HDAC10       | -0,025597296 | 0,282538747  | 0 | N.A. | 0 |
| PAPOLG       | -0,025636114 | -0,195984854 | 0 | N.A. | 0 |
| RP11-571M6   | -0,025665829 | 0,122998174  | 0 | N.A. | 0 |
| LRBA         | -0,025681033 | 0,028146006  | 0 | N.A. | 0 |
| MTSS1        | -0,02568104  | -0,052508472 | 0 | N.A. | 0 |
| TRAPPC11     | -0,025681417 | -0,143006643 | 0 | N.A. | 0 |
| RP11-692C24  | -0,025683669 | 0,061163592  | 0 | N.A. | 0 |
| ALK          | -0,025702868 |              | 0 | N.A. | 0 |
| C5orf17      | -0,025736415 | -0,198635496 | 0 | N.A. | 0 |
| ZNF423       | -0,025739365 | 0,137249692  | 0 | N.A. | 0 |
| ITK          | -0,025760488 | -0,145309899 | 0 | N.A. | 0 |
| ADCK5        | -0,025808823 | 0,271069598  | 0 | N.A. | 0 |
| KNG1         | -0,025819345 | 0,306565026  | 0 | N.A. | 0 |
| SCAPER       | -0,02582364  | 0,065821442  | 0 | N.A. | 0 |
| RP1-191J18.6 | -0,025826553 | 0,075045364  | 0 | N.A. | 0 |
| TCF12        | -0,025832859 | 0,075004095  | 0 | N.A. | 0 |
| GAL3ST4      | -0,025876774 | 0,042455087  | 0 | N.A. | 0 |
| RP5-1024G6   | -0,025896316 | -0,02786001  | 0 | N.A. | 0 |
| SNX15        | -0,025928905 | 0,311795886  | 0 | N.A. | 0 |
| CD48         | -0,025979728 | 0,004590085  | 0 | N.A. | 0 |
| RP11-317N8   | -0,025991887 | -0,050086333 | 0 | N.A. | 0 |

|             |              |              |   |      |   |
|-------------|--------------|--------------|---|------|---|
| SCAF8       | -0,025993179 | 0,235611726  | 0 | N.A. | 0 |
| FAM71D      | -0,026009037 | 0,117173021  | 0 | N.A. | 0 |
| USP51       | -0,026027411 |              | 0 | N.A. | 0 |
| SLC25A21-AS | -0,026035449 | -0,149852494 | 0 | N.A. | 0 |
| SRR         | -0,026051814 | 0,085369869  | 0 | N.A. | 0 |
| LRTM1       | -0,026052079 | -0,060508802 | 0 | N.A. | 0 |
| IGKV3-20    | -0,02605883  | 0,057074542  | 0 | N.A. | 0 |
| PALMD       | -0,026070182 | -0,138529922 | 0 | N.A. | 0 |
| POLR3A      | -0,026099358 | -0,051788991 | 0 | N.A. | 0 |
| FBXW8       | -0,026111161 | -0,142298157 | 0 | N.A. | 0 |
| CTD-2571L23 | -0,026129488 | 0,063615991  | 0 | N.A. | 0 |
| NTSR1       | -0,026216086 | 0,129331383  | 0 | N.A. | 0 |
| ANKAR       | -0,026248817 | 0,125805999  | 0 | N.A. | 0 |
| RP11-401P9. | -0,02625441  | -0,036169022 | 0 | N.A. | 0 |
| FAM13B      | -0,026305647 | -0,064341649 | 0 | N.A. | 0 |
| GFI1        | -0,02631271  | -0,11547557  | 0 | N.A. | 0 |
| SDC2        | -0,026317088 | -0,048366343 | 0 | N.A. | 0 |
| ZHX1-C8orf7 | -0,026344911 | 0,115801102  | 0 | N.A. | 0 |
| CIRBP-AS1   | -0,02636523  | 0,168469674  | 0 | N.A. | 0 |
| IGHV5-51    | -0,026380012 | -0,010054131 | 0 | N.A. | 0 |
| MCM3AP-AS   | -0,026386255 | 0,033090773  | 0 | N.A. | 0 |
| ISX         | -0,026397466 | 0,235639339  | 0 | N.A. | 0 |
| NCKAP5L     | -0,026415508 | 0,188237591  | 0 | N.A. | 0 |
| UBALD1      | -0,026420397 | -0,212060153 | 0 | N.A. | 0 |
| NMD3        | -0,02644252  | 0,048114925  | 0 | N.A. | 0 |
| C20orf85    | -0,026466353 |              | 0 | N.A. | 0 |
| CP          | -0,026495007 | 0,063069044  | 0 | N.A. | 0 |
| SGSM1       | -0,026501002 | 0,003796614  | 0 | N.A. | 0 |
| TTPAL       | -0,026547265 | 0,132559657  | 0 | N.A. | 0 |
| ELFN1       | -0,026556389 | 0,12877596   | 0 | N.A. | 0 |
| PTPRT       | -0,026579465 |              | 0 | N.A. | 0 |
| LINGO1      | -0,02658331  |              | 1 | cls3 | 0 |
| AC005740.6  | -0,02660954  |              | 0 | N.A. | 0 |

|              |              |              |   |      |   |
|--------------|--------------|--------------|---|------|---|
| SRBD1        | -0,026675381 | 0,057580929  | 0 | N.A. | 0 |
| ARHGAP4      | -0,026676888 | -0,197684298 | 0 | N.A. | 0 |
| ST3GAL4-AS1  | -0,026679007 | -0,19968602  | 0 | N.A. | 0 |
| SLC26A2      | -0,026746473 | -0,102871538 | 0 | N.A. | 0 |
| RAMP3        | -0,026766279 | -0,196619632 | 0 | N.A. | 0 |
| RP4-694B14.  | -0,026784349 | 0,227959848  | 0 | N.A. | 0 |
| ZNF571-AS1   | -0,026796431 | -0,081774836 | 0 | N.A. | 0 |
| CTD-3065J16  | -0,026815775 | -0,134603734 | 0 | N.A. | 0 |
| TMEM33       | -0,026829884 | 0,272703052  | 0 | N.A. | 0 |
| TMOD2        | -0,02684273  | 0,222155848  | 0 | N.A. | 0 |
| ARHGAP44     | -0,026846744 | -0,203443004 | 0 | N.A. | 0 |
| ZSCAN30      | -0,026860193 | -0,126311546 | 0 | N.A. | 0 |
| ZNF614       | -0,026876493 | -0,073928711 | 0 | N.A. | 0 |
| RP11-538D16  | -0,026885746 | 0,230498637  | 0 | N.A. | 0 |
| KDM4D        | -0,026908249 | 0,08096787   | 0 | N.A. | 0 |
| RP11-417E7.  | -0,026936088 |              | 0 | N.A. | 0 |
| SIN3A        | -0,026960122 | 0,145421843  | 0 | N.A. | 0 |
| CTU1         | -0,027002712 | -0,06728702  | 0 | N.A. | 0 |
| RP11-110I1.6 | -0,027073536 | 0,078946464  | 0 | N.A. | 0 |
| SAG          | -0,027079086 | -0,06999344  | 0 | N.A. | 0 |
| TREH         | -0,02708597  | -0,029818564 | 0 | N.A. | 0 |
| AKAP6        | -0,027090562 | 0,129928422  | 0 | N.A. | 0 |
| CACUL1       | -0,02710578  | 0,367538534  | 0 | N.A. | 0 |
| SLAIN1       | -0,027106976 | -0,203754428 | 0 | N.A. | 0 |
| CLCNKA       | -0,027120579 |              | 0 | N.A. | 0 |
| RCOR2        | -0,027218813 | 0,13038712   | 0 | N.A. | 0 |
| SLC22A11     | -0,027251111 | 0,148585237  | 0 | N.A. | 0 |
| CDK5R2       | -0,027290207 |              | 0 | N.A. | 0 |
| GNAI3        | -0,027308826 | -0,130649777 | 0 | N.A. | 0 |
| OBP2A        | -0,027314795 | -0,117176989 | 0 | N.A. | 0 |
| OXT          | -0,02734124  |              | 0 | N.A. | 0 |
| PNMT         | -0,027363758 | -0,201096232 | 0 | N.A. | 0 |
| ZNF836       | -0,0273672   | -0,077476125 | 0 | N.A. | 0 |



|             |              |              |   |      |   |
|-------------|--------------|--------------|---|------|---|
| RP11-375I20 | -0,027381285 | 0,213011784  | 0 | N.A. | 0 |
| SCARB1      | -0,027398484 | 0,250734721  | 0 | N.A. | 0 |
| LINC00645   | -0,027416088 |              | 0 | N.A. | 0 |
| FPR1        | -0,027419823 | 0,262926395  | 0 | N.A. | 0 |
| RP11-413H2  | -0,027425745 | 0,014722007  | 0 | N.A. | 0 |
| RP11-166O4  | -0,027436729 | 0,175520919  | 0 | N.A. | 0 |
| RMRP        | -0,027469797 | 0,205666483  | 0 | N.A. | 0 |
| RP11-283G6  | -0,027489202 | 0,001047933  | 0 | N.A. | 0 |
| CTD-2154B1  | -0,027496992 |              | 0 | N.A. | 0 |
| C21orf62-AS | -0,027511308 | -0,127848327 | 0 | N.A. | 0 |
| SV2C        | -0,027513909 | 0,17181073   | 0 | N.A. | 0 |
| ZNF783      | -0,02751958  | 0,027012846  | 0 | N.A. | 0 |
| OPRL1       | -0,027529047 |              | 0 | N.A. | 0 |
| C2CD4B      | -0,027539048 | 0,12056533   | 0 | N.A. | 0 |
| TMEM260     | -0,027588135 | -0,136582444 | 0 | N.A. | 0 |
| RP11-53I6.4 | -0,027630292 |              | 0 | N.A. | 0 |
| HBB         | -0,027652302 | -0,065937247 | 0 | N.A. | 0 |
| SSR4        | -0,027712436 | -0,011650976 | 0 | N.A. | 0 |
| ABHD12B     | -0,027719931 | -0,19626522  | 0 | N.A. | 0 |
| RP11-420N3  | -0,027744052 | 0,066264963  | 0 | N.A. | 0 |
| CFAP43      | -0,027767664 | -0,151354849 | 0 | N.A. | 0 |
| BEST2       | -0,027806756 | -0,13187     | 0 | N.A. | 0 |
| CYB5B       | -0,027808269 | -0,142576759 | 0 | N.A. | 0 |
| GATA2       | -0,027826605 | 0,089695589  | 0 | N.A. | 0 |
| IRAK4       | -0,027842105 | 0,005955524  | 0 | N.A. | 0 |
| ATP2C1      | -0,02786704  | 0,449784855  | 0 | N.A. | 0 |
| CAMK2B      | -0,027902703 | 0,071152823  | 0 | N.A. | 0 |
| RP5-855D21  | -0,027941848 | 0,174951697  | 0 | N.A. | 0 |
| ZNF721      | -0,027980744 | 0,028479871  | 0 | N.A. | 0 |
| SCRG1       | -0,027985289 | 0,009959805  | 0 | N.A. | 0 |
| BICC1       | -0,027990791 | -0,206640195 | 0 | N.A. | 0 |
| RNU12       | -0,028002848 | 0,161507238  | 0 | N.A. | 0 |
| NKG7        | -0,02804625  | -0,166293439 | 0 | N.A. | 0 |

|              |              |              |   |      |   |
|--------------|--------------|--------------|---|------|---|
| ATP6V1G2     | -0,028064295 |              | 0 | N.A. | 0 |
| CUL9         | -0,028074414 | -0,081913241 | 0 | N.A. | 0 |
| RP13-314C10  | -0,028084154 |              | 0 | N.A. | 0 |
| CCDC176      | -0,028131363 | 0,005789893  | 0 | N.A. | 0 |
| IGHG4        | -0,028151511 | -0,082987637 | 0 | N.A. | 0 |
| AP5M1        | -0,028157842 | -0,281738375 | 0 | N.A. | 0 |
| RP11-182J1.5 | -0,028166854 |              | 0 | N.A. | 0 |
| MLLT3        | -0,028172421 | -0,02482421  | 0 | N.A. | 0 |
| GABPA        | -0,028212264 | -0,1212866   | 0 | N.A. | 0 |
| RP11-20I20.4 | -0,028249784 |              | 0 | N.A. | 0 |
| SYTL1        | -0,028336515 | 0,158314419  | 0 | N.A. | 0 |
| CARM1        | -0,028373782 | 0,2452412    | 0 | N.A. | 0 |
| RP11-63L7.5  | -0,028418778 | -0,185261353 | 0 | N.A. | 0 |
| FXVD6        | -0,028433904 | 0,16374623   | 0 | N.A. | 0 |
| EML3         | -0,028520585 | 0,071339502  | 0 | N.A. | 0 |
| CCDC108      | -0,028541334 | -0,090161199 | 0 | N.A. | 0 |
| BGN          | -0,028543424 | -0,201953494 | 0 | N.A. | 0 |
| MIR4458HG    | -0,028567147 | -0,131641616 | 0 | N.A. | 0 |
| FAM227A      | -0,028586073 | 0,127960743  | 0 | N.A. | 0 |
| SOX6         | -0,028606159 | 0,210957144  | 0 | N.A. | 0 |
| UPP2         | -0,028650259 |              | 0 | N.A. | 0 |
| RP11-850A17  | -0,028758862 | 0,063108067  | 0 | N.A. | 0 |
| KLF15        | -0,028783014 |              | 0 | N.A. | 0 |
| LA16c-390E6  | -0,028783772 | 0,155216815  | 0 | N.A. | 0 |
| AL023806.1   | -0,028794125 |              | 0 | N.A. | 0 |
| SPAST        | -0,028795824 | 0,159661775  | 0 | N.A. | 0 |
| DNAJC25      | -0,028824287 | -0,059489339 | 0 | N.A. | 0 |
| C2CD4C       | -0,028831313 | 0,029278737  | 0 | N.A. | 0 |
| CCDC88C      | -0,028895671 | 0,013735676  | 0 | N.A. | 0 |
| HOXC6        | -0,02890672  | -0,10985658  | 0 | N.A. | 0 |
| PI4KA        | -0,028925023 | 0,174163199  | 0 | N.A. | 0 |
| TAC1         | -0,028981283 | -0,086037874 | 0 | N.A. | 0 |
| RP4-673M15   | -0,028990742 | -0,002876792 | 0 | N.A. | 0 |

|             |              |              |   |      |   |
|-------------|--------------|--------------|---|------|---|
| VANGL2      | -0,029004472 | 0,12622593   | 0 | N.A. | 0 |
| CDK8        | -0,029004928 | 0,321397933  | 0 | N.A. | 0 |
| CTB-179K24. | -0,029070651 | -0,299152488 | 0 | N.A. | 0 |
| TMEM252     | -0,029108716 | -0,163544892 | 0 | N.A. | 0 |
| RP11-325F22 | -0,029141053 |              | 0 | N.A. | 0 |
| RP11-275I14 | -0,029141164 | -0,1317812   | 0 | N.A. | 0 |
| RP4-710M16  | -0,029148778 | 0,354619229  | 0 | N.A. | 0 |
| SLC6A19     | -0,02916133  |              | 0 | N.A. | 0 |
| SATB1       | -0,029180554 | 0,226652458  | 0 | N.A. | 0 |
| LINC00992   | -0,029256893 | -0,11280199  | 0 | N.A. | 0 |
| RP11-18H21. | -0,029320287 | 0,035018591  | 0 | N.A. | 0 |
| CORO7       | -0,029320553 | 0,145059158  | 0 | N.A. | 0 |
| RP11-154H23 | -0,02938877  | 0,298409036  | 0 | N.A. | 0 |
| RP4-610C12. | -0,029420231 | -0,019425044 | 0 | N.A. | 0 |
| CPB2-AS1    | -0,029421552 |              | 0 | N.A. | 0 |
| BSN         | -0,029443279 |              | 0 | N.A. | 0 |
| ZNF559      | -0,029487008 | -0,229412006 | 0 | N.A. | 0 |
| DDHD1       | -0,029487296 | 0,110919089  | 0 | N.A. | 0 |
| P3H1        | -0,029495127 | 0,107657672  | 0 | N.A. | 0 |
| FAM183A     | -0,029496717 |              | 0 | N.A. | 0 |
| TRMT13      | -0,029551948 | -0,1194257   | 0 | N.A. | 0 |
| GZMA        | -0,029555661 | -0,190813515 | 0 | N.A. | 0 |
| RP11-696N14 | -0,029561808 | -0,105374064 | 0 | N.A. | 0 |
| CTD-2574D2. | -0,029563227 | 0,12790772   | 0 | N.A. | 0 |
| AP001439.2  | -0,029611655 | 0,296893427  | 0 | N.A. | 0 |
| SLFN11      | -0,029624927 | 0,064906472  | 0 | N.A. | 0 |
| TRIM35      | -0,029626192 | -0,028067315 | 0 | N.A. | 0 |
| AC005775.2  | -0,02969926  | 0,040569641  | 0 | N.A. | 0 |
| CRYBB3      | -0,029713558 | 0,234390152  | 0 | N.A. | 0 |
| RP11-223C24 | -0,029716112 | -0,325996825 | 0 | N.A. | 0 |
| INO80       | -0,029746847 | 0,070186545  | 0 | N.A. | 0 |
| RP11-793H13 | -0,029797248 | 0,047884273  | 0 | N.A. | 0 |
| RP11-217B7. | -0,029848204 |              | 0 | N.A. | 0 |

|             |              |              |   |      |   |
|-------------|--------------|--------------|---|------|---|
| DSCR9       | -0,029857483 | -0,1029559   | 0 | N.A. | 0 |
| CCL26       | -0,029864177 | 0,229687808  | 0 | N.A. | 0 |
| RP5-1033H2  | -0,029911673 | -0,15210927  | 0 | N.A. | 0 |
| LBX2-AS1    | -0,029926361 | -0,002818782 | 0 | N.A. | 0 |
| AC011747.4  | -0,02993136  | -0,044233708 | 0 | N.A. | 0 |
| ARPC5       | -0,029957742 | -0,123067312 | 0 | N.A. | 0 |
| C12orf42    | -0,029986838 | 0,210756405  | 0 | N.A. | 0 |
| TGIF1       | -0,030012851 | 0,271302817  | 0 | N.A. | 0 |
| CYP17A1     | -0,030017357 | -0,027339268 | 0 | N.A. | 0 |
| ADAMTS1     | -0,030039133 | 0,135114787  | 0 | N.A. | 0 |
| AGO1        | -0,030051057 | -0,160222671 | 0 | N.A. | 0 |
| SEC31B      | -0,030076705 | 0,154917478  | 0 | N.A. | 0 |
| AK1         | -0,030084826 | 0,134931066  | 0 | N.A. | 0 |
| RP11-700H6. | -0,030136317 | 0,396794056  | 0 | N.A. | 0 |
| ZNF436      | -0,030155065 | 0,059286956  | 0 | N.A. | 0 |
| PLAC9       | -0,030162772 | -0,022353255 | 0 | N.A. | 0 |
| CTC-246B18. | -0,030181402 | -0,105459018 | 0 | N.A. | 0 |
| CTD-2184C24 | -0,030236626 | 0,227685785  | 0 | N.A. | 0 |
| RP11-328K4. | -0,0302407   | -0,170066307 | 0 | N.A. | 0 |
| RP11-337C18 | -0,03027589  | -0,100814835 | 0 | N.A. | 0 |
| RP11-375N15 | -0,030278319 |              | 0 | N.A. | 0 |
| ALG1L2      | -0,030298677 | -0,080504426 | 0 | N.A. | 0 |
| GXYLT2      | -0,030332812 | -0,02926139  | 0 | N.A. | 0 |
| TSPYL5      | -0,030384738 |              | 0 | N.A. | 0 |
| FAM65B      | -0,030430464 | -0,074821232 | 0 | N.A. | 0 |
| ZNF563      | -0,030480008 | -0,151639225 | 0 | N.A. | 0 |
| FFAR4       | -0,030506781 | 0,217262544  | 0 | N.A. | 0 |
| PBRM1       | -0,030517926 | -0,173098142 | 0 | N.A. | 0 |
| IER3        | -0,030535342 | 0,087456085  | 0 | N.A. | 0 |
| RP11-983P16 | -0,030535621 | -0,036929545 | 0 | N.A. | 0 |
| RP11-677M1  | -0,030563225 | -0,014579664 | 0 | N.A. | 0 |
| TGFB3       | -0,03057733  | 0,020213711  | 0 | N.A. | 0 |
| RP11-314N13 | -0,030595812 | -0,055779656 | 0 | N.A. | 0 |

|              |              |              |   |      |   |
|--------------|--------------|--------------|---|------|---|
| RAB39A       | -0,030614859 |              | 0 | N.A. | 0 |
| RP11-255E6.  | -0,030638347 | 0,017476409  | 0 | N.A. | 0 |
| RP11-252A24  | -0,030674807 | 0,040523549  | 0 | N.A. | 0 |
| C2CD3        | -0,030678886 | 0,224549115  | 0 | N.A. | 0 |
| RNF217-AS1   | -0,030748809 |              | 0 | N.A. | 0 |
| ADAMTS7      | -0,030787465 | -0,254212092 | 0 | N.A. | 0 |
| RP11-109J4.1 | -0,030810671 | -0,126682947 | 0 | N.A. | 0 |
| NUDT18       | -0,030824867 | -0,144821064 | 0 | N.A. | 0 |
| CCER2        | -0,030829726 | 0,142040118  | 0 | N.A. | 0 |
| BRF1         | -0,03083     | 0,239680066  | 0 | N.A. | 0 |
| TESPA1       | -0,030840871 | -0,231364012 | 0 | N.A. | 0 |
| C22orf42     | -0,030877555 |              | 0 | N.A. | 0 |
| RP11-788H18  | -0,030877555 |              | 0 | N.A. | 0 |
| HOMEZ        | -0,03090413  | 0,200548137  | 0 | N.A. | 0 |
| RABL2B       | -0,031052851 | -0,056900557 | 0 | N.A. | 0 |
| RP11-380O24  | -0,031075496 | -0,150552393 | 0 | N.A. | 0 |
| ZNF492       | -0,031077672 | -0,003484453 | 0 | N.A. | 0 |
| RP3-465N24.  | -0,031082374 | -0,161225295 | 0 | N.A. | 0 |
| RET          | -0,031097416 | 0,072916664  | 0 | N.A. | 0 |
| TNFRSF13B    | -0,031101757 | 0,00498682   | 0 | N.A. | 0 |
| RP11-630C16  | -0,031116996 |              | 0 | N.A. | 0 |
| RP11-359E3.  | -0,031118915 | 0,024807426  | 0 | N.A. | 0 |
| B3GNT6       | -0,031124217 | -0,088969101 | 0 | N.A. | 0 |
| CTB-61M7.2   | -0,031133121 |              | 0 | N.A. | 0 |
| RP11-295I5.3 | -0,031139045 | 0,207161779  | 0 | N.A. | 0 |
| HIST1H4I     | -0,03116762  | -0,172389987 | 0 | N.A. | 0 |
| RP11-61L19.1 | -0,031182576 | 0,296229747  | 0 | N.A. | 0 |
| RP11-727A23  | -0,031198985 | 0,252252069  | 0 | N.A. | 0 |
| TIGD2        | -0,031220518 | -0,046468517 | 0 | N.A. | 0 |
| DAND5        | -0,031223893 | -0,13863491  | 0 | N.A. | 0 |
| RP11-78A19.  | -0,031246201 | 0,256972614  | 0 | N.A. | 0 |
| XPO7         | -0,031265806 | -0,015644314 | 0 | N.A. | 0 |
| SCG2         | -0,031273537 | 0,179240031  | 0 | N.A. | 0 |

|             |              |              |   |      |   |
|-------------|--------------|--------------|---|------|---|
| ZNF131      | -0,031278583 | -0,13401467  | 0 | N.A. | 0 |
| CLEC2A      | -0,031283087 |              | 0 | N.A. | 0 |
| SCN3A       | -0,031302199 |              | 0 | N.A. | 0 |
| ENPP3       | -0,031311119 | -0,141060938 | 0 | N.A. | 0 |
| DHX38       | -0,031398478 | 0,104292954  | 0 | N.A. | 0 |
| TLL11       | -0,031460565 | 0,037478814  | 0 | N.A. | 0 |
| ANGPTL6     | -0,031469363 | 0,326280281  | 0 | N.A. | 0 |
| AC005037.3  | -0,031487109 | 0,014902765  | 0 | N.A. | 0 |
| FAM181B     | -0,03150576  | -0,049490728 | 0 | N.A. | 0 |
| RP11-1151B1 | -0,031507917 |              | 0 | N.A. | 0 |
| SENP6       | -0,031515702 | 0,249750152  | 0 | N.A. | 0 |
| CTD-2033A10 | -0,031525731 | -0,114487542 | 0 | N.A. | 0 |
| C16orf46    | -0,031540723 | -0,375313348 | 0 | N.A. | 0 |
| SLC44A3     | -0,031594639 | 0,220956569  | 0 | N.A. | 0 |
| C6orf25     | -0,031601375 | -0,201758205 | 0 | N.A. | 0 |
| MSRA        | -0,031615869 | 0,187679787  | 0 | N.A. | 0 |
| NAT16       | -0,031636993 |              | 0 | N.A. | 0 |
| NUS1        | -0,0316445   | -0,192569561 | 0 | N.A. | 0 |
| PIBF1       | -0,031651337 | 0,220382348  | 0 | N.A. | 0 |
| TMEM110-M   | -0,031660124 | 0,194611799  | 0 | N.A. | 0 |
| RP11-307C12 | -0,031671325 | 0,209251114  | 0 | N.A. | 0 |
| AC025335.1  | -0,031701845 | -0,041224654 | 0 | N.A. | 0 |
| VEPH1       | -0,031733722 | -0,087798575 | 0 | N.A. | 0 |
| TRAPPC12    | -0,031735219 | 0,12088637   | 0 | N.A. | 0 |
| CCDC110     | -0,031757748 | -0,133270621 | 0 | N.A. | 0 |
| PIGN        | -0,031774625 | -0,107881997 | 0 | N.A. | 0 |
| RPRML       | -0,031784288 |              | 0 | N.A. | 0 |
| ATP6V1B1    | -0,031794578 | 0,000920475  | 0 | N.A. | 0 |
| RP1-12G14.7 | -0,031808325 | 0,111156675  | 0 | N.A. | 0 |
| RP11-156E8. | -0,031812703 | 0,124985517  | 0 | N.A. | 0 |
| EYA3        | -0,03184054  | 0,095971975  | 0 | N.A. | 0 |
| C1orf101    | -0,031841988 | -0,2034256   | 0 | N.A. | 0 |
| LINC00449   | -0,031873957 | -0,063682449 | 0 | N.A. | 0 |

|             |              |              |   |      |   |
|-------------|--------------|--------------|---|------|---|
| RNF125      | -0,031895286 | 0,031367123  | 0 | N.A. | 0 |
| GPR65       | -0,031905234 | -0,242489795 | 0 | N.A. | 0 |
| LINC01136   | -0,031906846 |              | 0 | N.A. | 0 |
| ENGASE      | -0,031930547 | 0,058579132  | 0 | N.A. | 0 |
| RWDD3       | -0,0319868   | -0,025853661 | 0 | N.A. | 0 |
| FAM66C      | -0,031996407 | -0,017298946 | 0 | N.A. | 0 |
| SEC63       | -0,032008378 | 0,258279176  | 0 | N.A. | 0 |
| RP11-21M24  | -0,032023568 |              | 0 | N.A. | 0 |
| TRMT10B     | -0,032023777 | -0,070524802 | 0 | N.A. | 0 |
| GABPB2      | -0,032048205 | 0,273088127  | 0 | N.A. | 0 |
| RP11-370A5. | -0,03206686  | 0,070154621  | 0 | N.A. | 0 |
| ANK1        | -0,032089567 | 0,118676684  | 0 | N.A. | 0 |
| RP11-650K20 | -0,032157426 | 0,139423592  | 0 | N.A. | 0 |
| FAM78B      | -0,032178125 | -0,137633309 | 0 | N.A. | 0 |
| AL589743.1  | -0,032182524 | 0,023470822  | 0 | N.A. | 0 |
| SETD8       | -0,032191363 | 0,014077575  | 0 | N.A. | 0 |
| FAXC        | -0,032192918 |              | 0 | N.A. | 0 |
| TPD52L2     | -0,032193324 | 0,11842099   | 0 | N.A. | 0 |
| VPS16       | -0,032196127 | -0,119797754 | 0 | N.A. | 0 |
| AKR1C4      | -0,032218437 | -0,015117364 | 0 | N.A. | 0 |
| EFTUD1      | -0,032219463 | 0,067594289  | 0 | N.A. | 0 |
| ATRIP       | -0,032251905 | -0,035789732 | 0 | N.A. | 0 |
| CTA-221G9.1 | -0,032259405 | 0,032302575  | 0 | N.A. | 0 |
| RP11-72M17  | -0,032292407 | -0,011169117 | 0 | N.A. | 0 |
| CD247       | -0,032304722 | -0,113100556 | 0 | N.A. | 0 |
| GNGT1       | -0,032349651 | -0,251812192 | 0 | N.A. | 0 |
| RP11-830F9. | -0,032392307 | -0,068388127 | 0 | N.A. | 0 |
| ARMC7       | -0,032402961 | 0,193060929  | 0 | N.A. | 0 |
| SCD5        | -0,0324067   | -0,285225418 | 0 | N.A. | 0 |
| SP4         | -0,032447125 | -0,066116191 | 0 | N.A. | 0 |
| ADAMTS6     | -0,032452284 | -0,005591738 | 0 | N.A. | 0 |
| TP53BP1     | -0,032491527 | -0,008043801 | 0 | N.A. | 0 |
| NXPE3       | -0,032499217 | 0,120959959  | 0 | N.A. | 0 |

|             |              |              |   |      |   |
|-------------|--------------|--------------|---|------|---|
| GIF         | -0,032538033 | -0,172627553 | 0 | N.A. | 0 |
| SOX5        | -0,032559654 | -0,031996085 | 0 | N.A. | 0 |
| RP1-120G22. | -0,032572867 | -0,13381446  | 0 | N.A. | 0 |
| CLNK        | -0,032583584 | -0,06342262  | 0 | N.A. | 0 |
| D2HGDH      | -0,032584686 | 0,174980403  | 0 | N.A. | 0 |
| TMEM170B    | -0,032585476 | -0,255171671 | 0 | N.A. | 0 |
| C9orf156    | -0,032593065 | 0,011908956  | 0 | N.A. | 0 |
| LINC01355   | -0,032594429 | 0,129631618  | 0 | N.A. | 0 |
| RP11-161M6  | -0,032623018 | -0,134272379 | 0 | N.A. | 0 |
| RP11-127L20 | -0,032741954 |              | 0 | N.A. | 0 |
| DRAXIN      | -0,032822747 | 0,092621571  | 0 | N.A. | 0 |
| BACE1       | -0,032847178 | 0,090356121  | 0 | N.A. | 0 |
| DLK2        | -0,032847481 |              | 0 | N.A. | 0 |
| STIM2       | -0,032878263 | 0,29285862   | 0 | N.A. | 0 |
| RP11-778D9. | -0,032883264 |              | 0 | N.A. | 0 |
| ULK3        | -0,032886637 | 0,206030633  | 0 | N.A. | 0 |
| ETAA1       | -0,032889659 | 0,086498187  | 0 | N.A. | 0 |
| TLE6        | -0,032973765 | -0,135488531 | 0 | N.A. | 0 |
| MT1HL1      | -0,032974859 | 0,048455864  | 0 | N.A. | 0 |
| ZNF710      | -0,032977303 | -0,107012365 | 0 | N.A. | 0 |
| IRX3        | -0,032978698 | -0,117408321 | 0 | N.A. | 0 |
| MIIP        | -0,03300311  | -0,046728422 | 0 | N.A. | 0 |
| PADI3       | -0,033020356 | -0,123786359 | 0 | N.A. | 0 |
| CPNE4       | -0,033029172 |              | 0 | N.A. | 0 |
| VPS33B      | -0,033049912 | 0,169692692  | 0 | N.A. | 0 |
| H3F3C       | -0,033062825 | -0,052976047 | 0 | N.A. | 0 |
| LEPROTL1    | -0,033066664 | 0,028789218  | 0 | N.A. | 0 |
| DDX43       | -0,033067981 | -0,050262379 | 0 | N.A. | 0 |
| FGD2        | -0,033072512 | -0,027667342 | 0 | N.A. | 0 |
| GLCE        | -0,033073698 | 0,052130717  | 0 | N.A. | 0 |
| FAM19A2     | -0,033086745 | -0,011162959 | 0 | N.A. | 0 |
| PLA1A       | -0,033111743 | 0,178447336  | 0 | N.A. | 0 |
| MAGEH1      | -0,033119475 | -0,112021906 | 0 | N.A. | 0 |



|             |              |              |   |      |   |
|-------------|--------------|--------------|---|------|---|
| GGT5        | -0,033121325 | 0,137370961  | 0 | N.A. | 0 |
| CTD-2325M2  | -0,03314583  | 0,123269884  | 0 | N.A. | 0 |
| RP11-173P15 | -0,033157761 |              | 0 | N.A. | 0 |
| RP11-159H10 | -0,033177504 | -0,098072801 | 0 | N.A. | 0 |
| AP000769.7  | -0,033178981 |              | 0 | N.A. | 0 |
| SLC16A1     | -0,03318932  | 0,236088743  | 0 | N.A. | 0 |
| GLYR1       | -0,033224181 | 0,010316345  | 0 | N.A. | 0 |
| AC019330.1  | -0,033232126 | -0,145996287 | 0 | N.A. | 0 |
| NXPE2       | -0,033237102 | -0,217621141 | 0 | N.A. | 0 |
| MYLK4       | -0,033240422 | -0,055790914 | 0 | N.A. | 0 |
| MYBL1       | -0,033290183 | -0,097754217 | 0 | N.A. | 0 |
| N4BP2L1     | -0,033330589 | 0,081311998  | 0 | N.A. | 0 |
| HECW2       | -0,033420038 | 0,129289636  | 0 | N.A. | 0 |
| PLCG2       | -0,033444445 | 0,157132706  | 0 | N.A. | 0 |
| FAM49B      | -0,033449116 | -0,137806954 | 0 | N.A. | 0 |
| RP11-46A10. | -0,033462413 | 0,13657281   | 0 | N.A. | 0 |
| ZNF652      | -0,033487399 | 0,126225433  | 0 | N.A. | 0 |
| RNF180      | -0,033496014 | -0,33128097  | 0 | N.A. | 0 |
| SCAMP4      | -0,033582825 | 0,433340421  | 0 | N.A. | 0 |
| ADAM32      | -0,033586887 | 0,234773514  | 0 | N.A. | 0 |
| LINC00867   | -0,033623271 | -0,126319003 | 0 | N.A. | 0 |
| RP11-186B7. | -0,033638775 | 0,07765737   | 0 | N.A. | 0 |
| BMX         | -0,033666329 | -0,180362209 | 0 | N.A. | 0 |
| CRLF1       | -0,033682931 | -0,251637519 | 0 | N.A. | 0 |
| TSTD2       | -0,033741341 | -0,226108982 | 0 | N.A. | 0 |
| ZC3HAV1L    | -0,033763693 | -0,033992501 | 0 | N.A. | 0 |
| ZNF354A     | -0,033779253 | -0,067324243 | 0 | N.A. | 0 |
| HIST1H2AM   | -0,033818426 | -0,129124918 | 0 | N.A. | 0 |
| CREBZF      | -0,033852986 | 0,280385487  | 0 | N.A. | 0 |
| RP11-169E6. | -0,033856211 | 0,087978673  | 0 | N.A. | 0 |
| SULT1C4     | -0,03385832  |              | 0 | N.A. | 0 |
| SHROOM2     | -0,033868461 | 0,451012069  | 0 | N.A. | 0 |
| FAM215B     | -0,033900751 | 0,396011709  | 0 | N.A. | 0 |

|             |              |              |   |      |   |
|-------------|--------------|--------------|---|------|---|
| CTC-338M12  | -0,033903665 | -0,247794304 | 0 | N.A. | 0 |
| ZNF234      | -0,033908335 | -0,020281958 | 0 | N.A. | 0 |
| PLXDC2      | -0,033970385 | -0,035262481 | 0 | N.A. | 0 |
| RP11-10A14. | -0,034021648 | -0,03820528  | 0 | N.A. | 0 |
| RP11-669E14 | -0,034022668 |              | 0 | N.A. | 0 |
| ABI3        | -0,034079185 | -0,288342468 | 0 | N.A. | 0 |
| ZNF720      | -0,034149089 | 0,032703528  | 0 | N.A. | 0 |
| TAF3        | -0,034163313 | 0,312553433  | 0 | N.A. | 0 |
| SZRD1       | -0,034179224 | -0,109544369 | 0 | N.A. | 0 |
| SPAG1       | -0,034194363 | 0,111764096  | 0 | N.A. | 0 |
| RP11-293A21 | -0,034217299 | -0,178670769 | 0 | N.A. | 0 |
| C2CD2       | -0,034234776 | 0,370202116  | 0 | N.A. | 0 |
| SEPW1       | -0,034252814 | -0,157276416 | 0 | N.A. | 0 |
| DLX4        | -0,034272505 | 0,025481153  | 0 | N.A. | 0 |
| REM1        | -0,034305156 | -0,045242009 | 0 | N.A. | 0 |
| PCDHGA11    | -0,034324213 | 0,237196145  | 0 | N.A. | 0 |
| EID2B       | -0,034362444 | 0,023693665  | 0 | N.A. | 0 |
| USP27X      | -0,034370872 | -0,00691661  | 0 | N.A. | 0 |
| RBBP9       | -0,034392917 | -0,483909576 | 0 | N.A. | 0 |
| IGLV2-11    | -0,034400158 |              | 0 | N.A. | 0 |
| DLG2        | -0,034419423 | 0,040089478  | 0 | N.A. | 0 |
| GAB3        | -0,034425542 |              | 0 | N.A. | 0 |
| A1CF        | -0,034431362 | -0,139740669 | 0 | N.A. | 0 |
| MIR3179-3   | -0,034476784 |              | 0 | N.A. | 0 |
| IGHV1-18    | -0,034485617 | -0,076928157 | 0 | N.A. | 0 |
| AC034243.1  | -0,034492811 | -0,129702665 | 0 | N.A. | 0 |
| SEC62       | -0,034541694 | 0,392462283  | 0 | N.A. | 0 |
| RP11-517P14 | -0,034566899 | -0,060567842 | 0 | N.A. | 0 |
| COL10A1     | -0,034593433 | -0,122924012 | 0 | N.A. | 0 |
| RP11-293M1  | -0,034620049 | 0,339619263  | 0 | N.A. | 0 |
| ZNF574      | -0,034625882 | -0,198189743 | 0 | N.A. | 0 |
| RP11-661A12 | -0,034649783 |              | 0 | N.A. | 0 |
| NR1H3       | -0,03465978  | -0,039986296 | 0 | N.A. | 0 |

|             |              |              |   |      |   |
|-------------|--------------|--------------|---|------|---|
| RP11-66N24. | -0,034666826 | -0,022372618 | 0 | N.A. | 0 |
| LCTL        | -0,034671349 |              | 0 | N.A. | 0 |
| CTD-2547L16 | -0,03468335  | -0,174104521 | 0 | N.A. | 0 |
| CTD-2192J16 | -0,034707268 | -0,04116748  | 0 | N.A. | 0 |
| SALRNA2     | -0,03474665  |              | 0 | N.A. | 0 |
| PAR6G-AS1   | -0,034758566 | 0,112279953  | 0 | N.A. | 0 |
| CTC-537E7.3 | -0,034779739 | -0,112197979 | 0 | N.A. | 0 |
| RP11-44F14. | -0,034801874 | -0,169553923 | 0 | N.A. | 0 |
| APOBEC3H    | -0,034823077 |              | 0 | N.A. | 0 |
| BMPER       | -0,034829041 | -0,025639342 | 0 | N.A. | 0 |
| PRSS57      | -0,034843526 | 0,301119163  | 0 | N.A. | 0 |
| PRSS21      | -0,03487604  |              | 0 | N.A. | 0 |
| ZBED6CL     | -0,034900243 | -0,12947942  | 0 | N.A. | 0 |
| PHF7        | -0,034900819 | -0,041691252 | 0 | N.A. | 0 |
| PAK4        | -0,035013959 | 0,417341471  | 0 | N.A. | 0 |
| GJC3        | -0,035036892 | -0,044795229 | 0 | N.A. | 0 |
| GPR173      | -0,035049071 |              | 0 | N.A. | 0 |
| RP11-521B24 | -0,035051029 | -0,083106326 | 0 | N.A. | 0 |
| ZFH4        | -0,035071099 | -0,049736412 | 0 | N.A. | 0 |
| CTC-1337H24 | -0,035082156 | 0,195925627  | 0 | N.A. | 0 |
| ZNF623      | -0,035085169 | 0,272041827  | 0 | N.A. | 0 |
| KRT75       | -0,035104725 |              | 0 | N.A. | 0 |
| PREX1       | -0,035114901 | -0,059091081 | 0 | N.A. | 0 |
| RP11-11N7.4 | -0,035169267 |              | 0 | N.A. | 0 |
| GAS6-AS2    | -0,035212196 |              | 0 | N.A. | 0 |
| KIAA1377    | -0,035234543 | -0,187945161 | 0 | N.A. | 0 |
| MPZ         | -0,035289237 | -0,016120961 | 0 | N.A. | 0 |
| ARHGAP25    | -0,035319746 | 0,131102131  | 0 | N.A. | 0 |
| BMPR1A      | -0,035381221 | -0,018799736 | 0 | N.A. | 0 |
| CARD8       | -0,035435488 | -0,169502689 | 0 | N.A. | 0 |
| AP001059.6  | -0,035452274 | 0,124845311  | 0 | N.A. | 0 |
| PNOC        | -0,035472004 | 0,026852192  | 0 | N.A. | 0 |
| KRT40       | -0,035472367 | 0,239466157  | 0 | N.A. | 0 |

|             |              |              |   |      |   |
|-------------|--------------|--------------|---|------|---|
| SERPINF1    | -0,035491977 | 0,10769203   | 0 | N.A. | 0 |
| CCDC149     | -0,035494957 | 0,067889491  | 0 | N.A. | 0 |
| RP11-549B18 | -0,035504957 | 0,121615522  | 0 | N.A. | 0 |
| SLC15A2     | -0,035563458 | 0,116598576  | 0 | N.A. | 0 |
| C16orf93    | -0,035572201 | -0,222145471 | 0 | N.A. | 0 |
| LINC01270   | -0,035590958 |              | 0 | N.A. | 0 |
| RASSF8      | -0,035641302 |              | 0 | N.A. | 0 |
| TUSC8       | -0,035663639 | -0,152233575 | 0 | N.A. | 0 |
| SLC25A35    | -0,035677879 | -0,060096638 | 0 | N.A. | 0 |
| MTTP        | -0,035751949 | 0,041233447  | 0 | N.A. | 0 |
| DNAH17      | -0,035775658 |              | 0 | N.A. | 0 |
| MS4A2       | -0,035836291 | -0,015278661 | 0 | N.A. | 0 |
| RP11-22A3.1 | -0,035880547 |              | 0 | N.A. | 0 |
| SLC44A5     | -0,035951617 | 0,096370189  | 0 | N.A. | 0 |
| RIBC1       | -0,036001111 | 0,023563368  | 0 | N.A. | 0 |
| AGAP6       | -0,036071887 | -0,032636962 | 0 | N.A. | 0 |
| TMEM156     | -0,036081654 | -0,159771983 | 0 | N.A. | 0 |
| TUBGCP6     | -0,036114621 | 0,248349736  | 0 | N.A. | 0 |
| CD52        | -0,036116699 | -0,320876369 | 0 | N.A. | 0 |
| FAM69B      | -0,036126088 | 0,131522796  | 0 | N.A. | 0 |
| RP11-326C3. | -0,036136581 | 0,102239856  | 0 | N.A. | 0 |
| Z69720.2    | -0,036162061 |              | 0 | N.A. | 0 |
| NECAB3      | -0,036172956 | 0,028204857  | 0 | N.A. | 0 |
| AC008753.6  | -0,036198234 |              | 0 | N.A. | 0 |
| LINC01187   | -0,036220104 |              | 0 | N.A. | 0 |
| GTF2E1      | -0,036279488 | -0,074996316 | 0 | N.A. | 0 |
| FAM188B     | -0,03634504  | -0,122864119 | 0 | N.A. | 0 |
| NPM2        | -0,036354885 | -0,229464824 | 0 | N.A. | 0 |
| C9orf153    | -0,036362077 |              | 0 | N.A. | 0 |
| LINC01526   | -0,036377561 | 0,087249701  | 0 | N.A. | 0 |
| RP11-280O1. | -0,036387318 |              | 0 | N.A. | 0 |
| RP11-802D6. | -0,036405315 |              | 0 | N.A. | 0 |
| TPSG1       | -0,036421992 | 0,221390333  | 0 | N.A. | 0 |

|              |                     |                    |          |            |   |
|--------------|---------------------|--------------------|----------|------------|---|
| HIST1H2BO    | -0,03643152         | -0,155626886       | 0        | N.A.       | 0 |
| ARMCX6       | -0,036440696        | 0,035304632        | 0        | N.A.       | 0 |
| KLC2         | -0,036489495        | 0,118823695        | 0        | N.A.       | 0 |
| ZNF487       | -0,036511998        | 0,010614545        | 0        | N.A.       | 0 |
| TP73         | -0,036538998        | -0,261471904       | 0        | N.A.       | 0 |
| CTD-2313J17  | -0,036541188        | -0,130425705       | 0        | N.A.       | 0 |
| CCDC82       | -0,036550542        | 0,281931961        | 0        | N.A.       | 0 |
| HSPA6        | -0,036552846        | 0,22474659         | 0        | N.A.       | 0 |
| OGN          | -0,036564732        | -0,157365624       | 0        | N.A.       | 0 |
| RP11-266L9.1 | -0,036567853        |                    | 0        | N.A.       | 0 |
| RP11-69I8.3  | -0,036579973        | -0,084866524       | 0        | N.A.       | 0 |
| RP11-273B20  | -0,036585477        | -0,13644575        | 0        | N.A.       | 0 |
| JUN          | -0,036602083        | 0,123079747        | 0        | N.A.       | 0 |
| THAP2        | -0,036602837        | -0,105673692       | 0        | N.A.       | 0 |
| GOSR1        | -0,036638574        | 0,006924987        | 0        | N.A.       | 0 |
| RP11-4B16.4  | -0,036681151        |                    | 0        | N.A.       | 0 |
| CH507-9B2.5  | -0,036682725        | -0,001687268       | 0        | N.A.       | 0 |
| <b>RIN1</b>  | <b>-0,036692804</b> | <b>0,269007313</b> | <b>1</b> | <b>cl2</b> | 0 |
| C19orf54     | -0,036705168        | -0,11989964        | 0        | N.A.       | 0 |
| TGM4         | -0,036727236        |                    | 0        | N.A.       | 0 |
| CPA2         | -0,036738678        | 0,185207027        | 0        | N.A.       | 0 |
| IBA57        | -0,036739572        | -0,214685097       | 0        | N.A.       | 0 |
| CTB-119C2.1  | -0,036749854        | 0,121358327        | 0        | N.A.       | 0 |
| ROBO3        | -0,036761042        | -0,064683189       | 0        | N.A.       | 0 |
| SLC25A30-AS  | -0,036778415        | -0,067260036       | 0        | N.A.       | 0 |
| ZNF14        | -0,036800068        | 0,126402915        | 0        | N.A.       | 0 |
| ZNF445       | -0,036818779        | 0,172184132        | 0        | N.A.       | 0 |
| GUCY1A2      | -0,036830162        |                    | 0        | N.A.       | 0 |
| ANKRD33B     | -0,036885421        | 0,082367129        | 0        | N.A.       | 0 |
| RP11-817O13  | -0,036906946        | 0,068071323        | 0        | N.A.       | 0 |
| KRBOX4       | -0,036910602        | 0,070033418        | 0        | N.A.       | 0 |
| ZG16         | -0,036925711        | 0,098333165        | 0        | N.A.       | 0 |
| FAM107A      | -0,036956381        | 0,050472017        | 0        | N.A.       | 0 |

|             |              |              |   |      |   |
|-------------|--------------|--------------|---|------|---|
| SCOC-AS1    | -0,037057638 | -0,256608625 | 0 | N.A. | 0 |
| BARX1       | -0,037080914 |              | 0 | N.A. | 0 |
| CTC-527H23. | -0,037085298 | 0,122021729  | 0 | N.A. | 0 |
| RP11-70C1.3 | -0,037142972 | 0,228428406  | 0 | N.A. | 0 |
| CLSTN2      | -0,037148877 |              | 1 | none | 0 |
| FBXL4       | -0,037154389 | 0,298373082  | 0 | N.A. | 0 |
| IGHA1       | -0,037208498 | -0,001243119 | 0 | N.A. | 0 |
| ENPEP       | -0,037217897 | 0,120111753  | 0 | N.A. | 0 |
| RGS19       | -0,037218938 | -0,122541554 | 0 | N.A. | 0 |
| NUDT13      | -0,037311832 | -0,031610427 | 0 | N.A. | 0 |
| PSMA3-AS1   | -0,037400585 | -0,167740916 | 0 | N.A. | 0 |
| LINC01410   | -0,03743969  |              | 0 | N.A. | 0 |
| RABL3       | -0,037459997 | 0,110714353  | 0 | N.A. | 0 |
| RP11-499E18 | -0,037479373 | -0,258654466 | 0 | N.A. | 0 |
| SEMA4C      | -0,037517008 | -0,001918035 | 0 | N.A. | 0 |
| AC009410.1  | -0,037526489 | -0,172157542 | 0 | N.A. | 0 |
| ATRN        | -0,037572743 | 0,064379492  | 0 | N.A. | 0 |
| RCOR3       | -0,037586258 | 0,055511145  | 0 | N.A. | 0 |
| RP11-54001. | -0,037608466 | -0,128244842 | 0 | N.A. | 0 |
| SLC17A9     | -0,037634982 | 0,010171974  | 0 | N.A. | 0 |
| RP11-54G14. | -0,037659553 | 0,237816232  | 0 | N.A. | 0 |
| METTL16     | -0,037689009 | -0,249205571 | 0 | N.A. | 0 |
| MORF4L2-AS  | -0,037700524 | -0,204359881 | 0 | N.A. | 0 |
| CAPN10-AS1  | -0,037717177 | 0,022131458  | 0 | N.A. | 0 |
| LPCAT1      | -0,037724858 | 0,227025097  | 0 | N.A. | 0 |
| DPF2        | -0,037739192 | 0,298522673  | 0 | N.A. | 0 |
| TMEM68      | -0,037744018 | -0,134122552 | 0 | N.A. | 0 |
| CSDE1       | -0,037757949 | -0,329016626 | 0 | N.A. | 0 |
| PON3        | -0,037834069 | -0,049115677 | 0 | N.A. | 0 |
| CD36        | -0,037838023 | -0,116589318 | 0 | N.A. | 0 |
| C11orf95    | -0,037843043 | 0,071370476  | 0 | N.A. | 0 |
| UBE3B       | -0,037870136 | 0,046133238  | 0 | N.A. | 0 |
| APOL3       | -0,037895956 | -0,121342527 | 0 | N.A. | 0 |

|              |              |              |   |      |   |
|--------------|--------------|--------------|---|------|---|
| CTDSPL2      | -0,037914494 | -0,061967489 | 0 | N.A. | 0 |
| CRMP1        | -0,037966103 |              | 0 | N.A. | 0 |
| CTD-319301   | -0,037985256 |              | 0 | N.A. | 0 |
| PGM5P2       | -0,037986284 | 0,273402094  | 0 | N.A. | 0 |
| RP11-849F2.1 | -0,038022545 | 0,173639896  | 0 | N.A. | 0 |
| STK36        | -0,038032321 | -0,011729472 | 0 | N.A. | 0 |
| MADCAM1      | -0,038074562 | 0,277051101  | 0 | N.A. | 0 |
| SLC38A9      | -0,038080588 | 0,057242335  | 0 | N.A. | 0 |
| ALMS1        | -0,038104265 | 0,285381743  | 0 | N.A. | 0 |
| C2orf27B     | -0,03814521  | -0,050374402 | 0 | N.A. | 0 |
| NARFL        | -0,038251409 | -0,0710757   | 0 | N.A. | 0 |
| ESM1         | -0,038318187 | 0,119907963  | 0 | N.A. | 0 |
| PDPK1        | -0,038319835 | 0,353686686  | 0 | N.A. | 0 |
| MORN3        | -0,03833648  | 0,061023144  | 0 | N.A. | 0 |
| DUSP15       | -0,038411102 | -0,066709359 | 0 | N.A. | 0 |
| ZNF649       | -0,038419145 | -0,333079693 | 0 | N.A. | 0 |
| RP11-1348G1  | -0,038444632 | 0,108382866  | 0 | N.A. | 0 |
| TRIM14       | -0,038463799 | 0,137699486  | 0 | N.A. | 0 |
| CDK2AP1      | -0,038474396 | -0,110579974 | 0 | N.A. | 0 |
| DAGLA        | -0,038491313 | 0,012189855  | 0 | N.A. | 0 |
| ROBO2        | -0,038495451 | -0,137498824 | 0 | N.A. | 0 |
| PIGM         | -0,038529719 | 0,253975971  | 0 | N.A. | 0 |
| BAALC        | -0,038562936 | -0,257169163 | 0 | N.A. | 0 |
| CTD-2314G2   | -0,038570078 | 0,185801021  | 0 | N.A. | 0 |
| LINC01089    | -0,038619078 | -0,047701182 | 0 | N.A. | 0 |
| SLC12A9      | -0,038637541 | 0,203128517  | 0 | N.A. | 0 |
| NRROS        | -0,038663205 | 0,144148133  | 0 | N.A. | 0 |
| SLC22A17     | -0,03876921  |              | 0 | N.A. | 0 |
| CTB-58E17.3  | -0,038770583 | -0,036187082 | 0 | N.A. | 0 |
| DHRS12       | -0,038776982 | 0,175228379  | 0 | N.A. | 0 |
| AF129408.17  | -0,03878329  |              | 0 | N.A. | 0 |
| GNG2         | -0,038793617 | -0,021051064 | 0 | N.A. | 0 |
| WAPAL        | -0,038840407 | -0,030161309 | 0 | N.A. | 0 |

|              |              |              |   |      |   |
|--------------|--------------|--------------|---|------|---|
| APBA2        | -0,038856314 | 0,18617038   | 0 | N.A. | 0 |
| SERPINB6     | -0,038870642 | 0,323236594  | 0 | N.A. | 0 |
| TSPEAR-AS2   | -0,038870925 | 0,023588336  | 0 | N.A. | 0 |
| RP11-89K11.  | -0,038953729 | -0,080170565 | 0 | N.A. | 0 |
| C11orf54     | -0,038976778 | 0,085907016  | 0 | N.A. | 0 |
| GFRA1        | -0,038988729 |              | 0 | N.A. | 0 |
| GCK          | -0,039013578 |              | 0 | N.A. | 0 |
| RP11-936I5.1 | -0,039057162 |              | 0 | N.A. | 0 |
| AF196972.9   | -0,039140917 | 0,010295143  | 0 | N.A. | 0 |
| CMKLR1       | -0,039203944 |              | 0 | N.A. | 0 |
| CTC-241F20.4 | -0,03921092  |              | 0 | N.A. | 0 |
| PCDHB2       | -0,039222253 | 0,000891557  | 0 | N.A. | 0 |
| PSMD10       | -0,039294902 | -0,108238813 | 0 | N.A. | 0 |
| C17orf98     | -0,039295607 |              | 0 | N.A. | 0 |
| CEND1        | -0,039307439 | 0,007950892  | 0 | N.A. | 0 |
| PPP2R3C      | -0,039383402 | -0,114188927 | 0 | N.A. | 0 |
| SNRNP27      | -0,039454125 | 0,017319061  | 0 | N.A. | 0 |
| ATG16L2      | -0,039457297 | -0,090984816 | 0 | N.A. | 0 |
| RP3-333H23.  | -0,039472063 | 0,021417558  | 0 | N.A. | 0 |
| GGACT        | -0,03950469  | 0,136470456  | 0 | N.A. | 0 |
| RP11-356I2.4 | -0,039505013 | -0,028856414 | 0 | N.A. | 0 |
| ZMYM3        | -0,039538147 | -0,225018507 | 0 | N.A. | 0 |
| SH3YL1       | -0,039553145 | 0,182203103  | 0 | N.A. | 0 |
| RP11-755B10  | -0,039563441 |              | 0 | N.A. | 0 |
| RP11-234B24  | -0,039563496 | -0,040230383 | 0 | N.A. | 0 |
| FTO          | -0,03957966  | -0,128941536 | 0 | N.A. | 0 |
| DZIP1        | -0,03958281  | -0,058854415 | 0 | N.A. | 0 |
| COMP         | -0,039631816 | 0,209377737  | 0 | N.A. | 0 |
| SEC24B-AS1   | -0,039636109 | -0,151298781 | 0 | N.A. | 0 |
| F5           | -0,039643105 | -0,132761015 | 0 | N.A. | 0 |
| IGHMBP2      | -0,039643578 | 0,115831316  | 0 | N.A. | 0 |
| CTB-50L17.10 | -0,039670581 | -0,087859525 | 0 | N.A. | 0 |
| FCGBP        | -0,039672563 | 0,260177058  | 0 | N.A. | 0 |



|             |              |              |   |      |   |
|-------------|--------------|--------------|---|------|---|
| INTS5       | -0,039691993 | -0,222347084 | 0 | N.A. | 0 |
| WBP1        | -0,039698354 | -0,07673184  | 0 | N.A. | 0 |
| OSM         | -0,039717989 | 0,031803448  | 0 | N.A. | 0 |
| KLHL42      | -0,039724689 | 0,118305933  | 0 | N.A. | 0 |
| RP3-337O18  | -0,039737696 | -0,264570892 | 0 | N.A. | 0 |
| SMN2        | -0,039750349 | 0,090537373  | 0 | N.A. | 0 |
| CARD9       | -0,039754455 | -0,141802955 | 0 | N.A. | 0 |
| GNG13       | -0,039763025 | -0,174411512 | 0 | N.A. | 0 |
| BCL11B      | -0,039791645 | -0,133517117 | 0 | N.A. | 0 |
| SERPINA4    | -0,03984342  | 0,113323091  | 0 | N.A. | 0 |
| CTB-152G17  | -0,039848653 | 0,134639429  | 0 | N.A. | 0 |
| CTD-2116N2  | -0,039852448 | -0,104266961 | 0 | N.A. | 0 |
| ZNF263      | -0,039873001 | 0,066764741  | 0 | N.A. | 0 |
| MAPK15      | -0,03992487  | -0,202051282 | 0 | N.A. | 0 |
| RP11-518L10 | -0,039950742 | 0,035440467  | 0 | N.A. | 0 |
| ZNF586      | -0,040006139 | -0,205897811 | 0 | N.A. | 0 |
| SOX17       | -0,040013284 | -0,188389274 | 0 | N.A. | 0 |
| TG          | -0,040053129 | -0,00646542  | 0 | N.A. | 0 |
| CTSK        | -0,040065677 | 0,055848739  | 0 | N.A. | 0 |
| POLR3GL     | -0,040070573 | 0,079528311  | 0 | N.A. | 0 |
| PRKG1       | -0,040182557 | -0,210214325 | 0 | N.A. | 0 |
| FBP2        | -0,040248038 | 0,158153434  | 0 | N.A. | 0 |
| C10orf67    | -0,040272977 | -0,085145186 | 0 | N.A. | 0 |
| CTB-25B13.9 | -0,040301014 | 0,083283446  | 0 | N.A. | 0 |
| TEKT5       | -0,040309393 | -0,052744057 | 0 | N.A. | 0 |
| GTF3C1      | -0,040310942 | -0,028741867 | 0 | N.A. | 0 |
| CCL15       | -0,040378883 | 0,024833251  | 0 | N.A. | 0 |
| XPOT        | -0,040407365 | -0,009119347 | 0 | N.A. | 0 |
| KLHDC7B     | -0,040453394 | -0,170903855 | 0 | N.A. | 0 |
| KDM4A       | -0,040472919 | -0,027997915 | 0 | N.A. | 0 |
| RP11-350G8  | -0,040497759 |              | 0 | N.A. | 0 |
| RP11-381K20 | -0,040499734 | -0,386517281 | 0 | N.A. | 0 |
| EPHB4       | -0,0405345   | 0,147080456  | 0 | N.A. | 0 |

|             |              |              |   |      |   |
|-------------|--------------|--------------|---|------|---|
| PKP4        | -0,040591637 | 0,122129934  | 0 | N.A. | 0 |
| AC090587.5  | -0,040598556 | -0,07366167  | 0 | N.A. | 0 |
| CXCL3       | -0,040601603 | 0,426846184  | 0 | N.A. | 0 |
| CHKB        | -0,040615579 | 0,255012127  | 0 | N.A. | 0 |
| RP11-561B11 | -0,040626784 |              | 0 | N.A. | 0 |
| CHN1        | -0,040639739 | -0,04122818  | 0 | N.A. | 0 |
| CTDSPL      | -0,040689681 | 0,089174765  | 0 | N.A. | 0 |
| KCNV1       | -0,04071207  | -0,11338108  | 0 | N.A. | 0 |
| AC007950.2  | -0,040715944 | -0,033561886 | 0 | N.A. | 0 |
| SYCP2       | -0,04072902  | 0,005819786  | 0 | N.A. | 0 |
| VIPAS39     | -0,040735384 | 0,018809661  | 0 | N.A. | 0 |
| AC005363.11 | -0,040769297 | -0,02981579  | 0 | N.A. | 0 |
| RP11-250B2. | -0,040786377 | 0,027362727  | 0 | N.A. | 0 |
| ZRSR1       | -0,040877974 |              | 0 | N.A. | 0 |
| PLA2G4F     | -0,040888221 | 0,015422932  | 0 | N.A. | 0 |
| GRAP        | -0,040948783 | -0,037041979 | 0 | N.A. | 0 |
| RP11-620J15 | -0,040983617 |              | 0 | N.A. | 0 |
| AC093585.6  | -0,040995185 | 0,105843724  | 0 | N.A. | 0 |
| ACSL1       | -0,041002915 | 0,038864887  | 0 | N.A. | 0 |
| CALY        | -0,041027374 |              | 0 | N.A. | 0 |
| C1orf95     | -0,041055339 | 0,282532256  | 0 | N.A. | 0 |
| HOXD13      | -0,041064225 | 0,061089958  | 0 | N.A. | 0 |
| AC005944.2  | -0,041079594 | -0,12364569  | 0 | N.A. | 0 |
| FYB         | -0,041090656 | -0,18955687  | 0 | N.A. | 0 |
| ZNF182      | -0,041125881 | 0,029526252  | 0 | N.A. | 0 |
| PRSS45      | -0,041137903 |              | 0 | N.A. | 0 |
| RP11-250B2. | -0,041195648 | 0,329926764  | 0 | N.A. | 0 |
| PTAR1       | -0,04128093  | 0,262156712  | 0 | N.A. | 0 |
| SH3GL2      | -0,041294533 |              | 0 | N.A. | 0 |
| GPR83       | -0,041294606 | 0,119833141  | 0 | N.A. | 0 |
| CIB4        | -0,041341198 | 0,063261305  | 0 | N.A. | 0 |
| SERPINF2    | -0,041343759 | -0,242579506 | 0 | N.A. | 0 |
| VAV1        | -0,041344731 | -0,093191595 | 0 | N.A. | 0 |

|             |              |              |   |      |   |
|-------------|--------------|--------------|---|------|---|
| PCAT2       | -0,041359528 | 0,042314878  | 0 | N.A. | 0 |
| DACT3-AS1   | -0,041375595 |              | 0 | N.A. | 0 |
| POU6F2-AS1  | -0,04138256  | 0,026113746  | 0 | N.A. | 0 |
| ALDH6A1     | -0,041387925 | -0,071134563 | 0 | N.A. | 0 |
| FIGN        | -0,041402439 | 0,264023925  | 0 | N.A. | 0 |
| FGF14-AS2   | -0,041423418 | -0,05245725  | 0 | N.A. | 0 |
| AC009473.1  | -0,041485524 |              | 0 | N.A. | 0 |
| RP11-111M2  | -0,0414903   | -0,124771925 | 0 | N.A. | 0 |
| GLOD5       | -0,041511624 | -0,127452649 | 0 | N.A. | 0 |
| CLCN2       | -0,041555336 | 0,224291375  | 0 | N.A. | 0 |
| CTD-2012K14 | -0,041615078 |              | 0 | N.A. | 0 |
| MB          | -0,041618568 | 0,162958145  | 0 | N.A. | 0 |
| HCG11       | -0,041629758 | -0,143361879 | 0 | N.A. | 0 |
| CTD-2081C10 | -0,041679241 |              | 0 | N.A. | 0 |
| UBLCP1      | -0,041708719 | -0,312549122 | 0 | N.A. | 0 |
| PCDHB12     | -0,041754766 |              | 0 | N.A. | 0 |
| THSD1       | -0,041770196 | 0,020835158  | 0 | N.A. | 0 |
| GPAM        | -0,041796534 | 0,009976026  | 0 | N.A. | 0 |
| CAPN9       | -0,041796555 | 0,176828944  | 0 | N.A. | 0 |
| MEF2BNB-M   | -0,041846803 | 0,252094388  | 0 | N.A. | 0 |
| UCP3        | -0,041859054 |              | 0 | N.A. | 0 |
| RP11-27M9.1 | -0,041870645 |              | 0 | N.A. | 0 |
| ERLIN2      | -0,041874137 | 0,269653655  | 0 | N.A. | 0 |
| TMX3        | -0,041919442 | 0,380721363  | 0 | N.A. | 0 |
| FBXO7       | -0,041967853 | -0,041029548 | 0 | N.A. | 0 |
| C17orf51    | -0,042004355 | 0,047135114  | 0 | N.A. | 0 |
| RP11-3P17.4 | -0,042005812 | -0,073445965 | 0 | N.A. | 0 |
| ZFYVE21     | -0,042065263 | 0,203822235  | 0 | N.A. | 0 |
| CABP7       | -0,042099676 |              | 0 | N.A. | 0 |
| AF127936.7  | -0,0421494   | 0,296578473  | 0 | N.A. | 0 |
| PCAT1       | -0,042171382 | -0,139981951 | 0 | N.A. | 0 |
| SLCO5A1     | -0,042212525 | 0,266395567  | 0 | N.A. | 0 |
| ARSG        | -0,042259962 | -0,269174012 | 0 | N.A. | 0 |

|              |              |              |   |      |   |
|--------------|--------------|--------------|---|------|---|
| RP11-211N8.  | -0,042330976 | -0,024863376 | 0 | N.A. | 0 |
| EIF3CL       | -0,042336575 | -0,217712692 | 0 | N.A. | 0 |
| RP11-876N24  | -0,042381265 |              | 0 | N.A. | 0 |
| TAF4B        | -0,042392584 | -0,204272232 | 0 | N.A. | 0 |
| SLC16A12     | -0,042428665 |              | 0 | N.A. | 0 |
| COX7A1       | -0,042434386 | -0,173003597 | 0 | N.A. | 0 |
| GAS5-AS1     | -0,042459308 | 0,131606674  | 0 | N.A. | 0 |
| ERMAP        | -0,042521307 | -0,094771722 | 0 | N.A. | 0 |
| RIC8A        | -0,042535926 | 0,023699533  | 0 | N.A. | 0 |
| CTB-96E2.7   | -0,042564066 |              | 0 | N.A. | 0 |
| PAF1         | -0,042601915 | 0,466593977  | 0 | N.A. | 0 |
| PON1         | -0,042607553 | 0,077998511  | 0 | N.A. | 0 |
| RNF182       | -0,042610024 |              | 0 | N.A. | 0 |
| HUWE1        | -0,042610658 | 0,271321114  | 0 | N.A. | 0 |
| CEP135       | -0,042627728 | 0,010739199  | 0 | N.A. | 0 |
| RP11-481J2.4 | -0,042641345 | -0,137651986 | 0 | N.A. | 0 |
| C1QTNF3      | -0,042645742 | -0,060066912 | 0 | N.A. | 0 |
| FENDRR       | -0,04267516  |              | 0 | N.A. | 0 |
| DKK3         | -0,042686387 | 0,070799463  | 0 | N.A. | 0 |
| CTC-503J8.4  | -0,042709814 | 6,58404E-05  | 0 | N.A. | 0 |
| KLHL6        | -0,042725607 | -0,128633565 | 0 | N.A. | 0 |
| ULK2         | -0,04277806  | -0,248914052 | 0 | N.A. | 0 |
| GATA3-AS1    | -0,042791425 | -0,048143372 | 0 | N.A. | 0 |
| PXDN         | -0,042798236 | 0,009348588  | 0 | N.A. | 0 |
| DCN          | -0,042804901 | -0,249066929 | 0 | N.A. | 0 |
| TMEM31       | -0,042836682 | 0,051670952  | 0 | N.A. | 0 |
| BTN1A1       | -0,042849259 |              | 0 | N.A. | 0 |
| CALHM3       | -0,042850389 | -0,13353802  | 0 | N.A. | 0 |
| HOMER2       | -0,042867991 | 0,027486578  | 0 | N.A. | 0 |
| AMIGO1       | -0,042924458 | 0,011561906  | 0 | N.A. | 0 |
| TMEM25       | -0,042929711 | 0,048767104  | 0 | N.A. | 0 |
| AP3D1        | -0,042945496 | 0,432333353  | 0 | N.A. | 0 |
| PPAP2B       | -0,042974904 | -0,219677466 | 0 | N.A. | 0 |

|              |              |              |   |      |   |
|--------------|--------------|--------------|---|------|---|
| RP13-942N8.  | -0,042978965 | -0,151358364 | 0 | N.A. | 0 |
| RASSF1-AS1   | -0,043009438 | -0,080320716 | 0 | N.A. | 0 |
| ESRRG        | -0,043014272 | -0,238102892 | 0 | N.A. | 0 |
| PEX5L        | -0,043061769 |              | 0 | N.A. | 0 |
| PPP2R3B      | -0,043086925 | 0,091769558  | 0 | N.A. | 0 |
| RP11-455O6.  | -0,0431164   | 0,136163744  | 0 | N.A. | 0 |
| JRKL         | -0,043150874 | -0,00852321  | 0 | N.A. | 0 |
| RP11-307L14  | -0,043180078 | 0,04281172   | 0 | N.A. | 0 |
| PDP2         | -0,043194238 | 0,161672346  | 0 | N.A. | 0 |
| RP11-475O6.  | -0,043196039 |              | 0 | N.A. | 0 |
| RBM12        | -0,043199481 | 0,208593328  | 0 | N.A. | 0 |
| GPR124       | -0,043215111 | -0,106358887 | 0 | N.A. | 0 |
| C4orf29      | -0,043236297 | 0,066552751  | 0 | N.A. | 0 |
| ERICH3       | -0,043243223 | 0,236229665  | 0 | N.A. | 0 |
| RP11-305K5.  | -0,043250088 | -0,073795557 | 0 | N.A. | 0 |
| PANK1        | -0,043309088 | -0,05519915  | 0 | N.A. | 0 |
| ZNF460       | -0,043317194 | 0,10189102   | 0 | N.A. | 0 |
| GPLD1        | -0,04332427  |              | 0 | N.A. | 0 |
| GPC4         | -0,043336534 | -0,090327386 | 0 | N.A. | 0 |
| GPX8         | -0,043380384 | -0,269072203 | 0 | N.A. | 0 |
| RP11-467P9.  | -0,043412106 | 0,101459042  | 0 | N.A. | 0 |
| SMIM12       | -0,043425886 | 0,141691762  | 0 | N.A. | 0 |
| CTD-2555A7.  | -0,043429936 | -0,126832881 | 0 | N.A. | 0 |
| ARAP3        | -0,043506039 | 0,242113588  | 0 | N.A. | 0 |
| GALE         | -0,043510127 | 0,442664017  | 0 | N.A. | 0 |
| CTD-2547H1.  | -0,043533603 | -0,047673282 | 0 | N.A. | 0 |
| AP1M1        | -0,043538177 | -0,047665545 | 0 | N.A. | 0 |
| SAP30L-AS1   | -0,04354808  | -0,058741363 | 0 | N.A. | 0 |
| IKBIP        | -0,043568    | -0,053862461 | 0 | N.A. | 0 |
| RP11-1017G2  | -0,043573964 | 0,136456352  | 0 | N.A. | 0 |
| ACOXL        | -0,043595995 | -0,035054796 | 0 | N.A. | 0 |
| CTD-2547G2.  | -0,043764222 | 0,169744904  | 0 | N.A. | 0 |
| RP11-526I2.5 | -0,043799201 | 0,005617409  | 0 | N.A. | 0 |

|             |              |              |   |      |   |
|-------------|--------------|--------------|---|------|---|
| NBPF3       | -0,043886135 | -0,140772266 | 0 | N.A. | 0 |
| HAPLN1      | -0,043906953 |              | 0 | N.A. | 0 |
| IPO7        | -0,043960674 | 0,024736226  | 0 | N.A. | 0 |
| FGR         | -0,043963996 | -0,153020154 | 0 | N.A. | 0 |
| CENPC       | -0,043967892 | 0,02346936   | 0 | N.A. | 0 |
| HOXD4       | -0,044041527 | 0,147716069  | 0 | N.A. | 0 |
| FGF20       | -0,044059917 | 0,357053307  | 0 | N.A. | 0 |
| ANGPTL5     | -0,044111234 | -0,159945608 | 0 | N.A. | 0 |
| LIMS1       | -0,044215788 | 0,127923799  | 0 | N.A. | 0 |
| ASCL1       | -0,044227113 |              | 0 | N.A. | 0 |
| SVIP        | -0,044237216 | 0,156555359  | 0 | N.A. | 0 |
| PPP1R10     | -0,044264777 | 0,066767856  | 0 | N.A. | 0 |
| ZSCAN9      | -0,044307451 | 0,107601717  | 0 | N.A. | 0 |
| SIRPB1      | -0,04432774  | 0,234783152  | 0 | N.A. | 0 |
| ARFRP1      | -0,044335566 | 0,080647163  | 0 | N.A. | 0 |
| SOX12       | -0,044371962 | 0,00880912   | 0 | N.A. | 0 |
| RP11-1055B8 | -0,044374068 | 0,249645432  | 0 | N.A. | 0 |
| RP11-863P13 | -0,044480325 | 0,021669065  | 0 | N.A. | 0 |
| QPCTL       | -0,044491913 | -0,096218639 | 0 | N.A. | 0 |
| KIZ-AS1     | -0,044492213 | -0,100890727 | 0 | N.A. | 0 |
| IFNL1       | -0,044503231 |              | 0 | N.A. | 0 |
| UBXN1       | -0,044515132 | 0,088579857  | 0 | N.A. | 0 |
| RP11-443B7. | -0,044538268 | 0,101837471  | 0 | N.A. | 0 |
| UGT2B10     | -0,044553175 |              | 0 | N.A. | 0 |
| FAM161B     | -0,044563088 | 0,056936545  | 0 | N.A. | 0 |
| CACNA1A     | -0,044573036 | 0,07738115   | 0 | N.A. | 0 |
| ACTR1A      | -0,044604212 | -0,043313217 | 0 | N.A. | 0 |
| ZNF788      | -0,044605596 |              | 0 | N.A. | 0 |
| AC005523.2  | -0,044632521 | -0,060822989 | 0 | N.A. | 0 |
| CTA-398F10. | -0,044761623 | -0,314767257 | 0 | N.A. | 0 |
| HRAS        | -0,044771774 | 0,198351362  | 0 | N.A. | 0 |
| SLC25A40    | -0,044778308 | -0,1121261   | 0 | N.A. | 0 |
| RP11-440L14 | -0,044786792 | -0,101726119 | 0 | N.A. | 0 |

|             |              |              |   |      |   |
|-------------|--------------|--------------|---|------|---|
| YTHDC2      | -0,044787412 | -0,042238932 | 0 | N.A. | 0 |
| ITGBL1      | -0,044854029 | -0,043578553 | 0 | N.A. | 0 |
| PGAM2       | -0,044900734 | -0,080590171 | 0 | N.A. | 0 |
| MSANTD2     | -0,044922879 | -0,071210906 | 0 | N.A. | 0 |
| RINL        | -0,044953498 | -0,079562403 | 0 | N.A. | 0 |
| TOM1L1      | -0,044973205 | -0,159136411 | 0 | N.A. | 0 |
| KLRG1       | -0,045013565 | -0,03181014  | 0 | N.A. | 0 |
| DNMT3A      | -0,045014197 | -0,159472088 | 0 | N.A. | 0 |
| AC253572.1  | -0,045041255 | -0,0857215   | 0 | N.A. | 0 |
| SLC36A4     | -0,045043948 | -0,051136704 | 0 | N.A. | 0 |
| CACNA1D     | -0,045045704 | 0,173080548  | 0 | N.A. | 0 |
| RP11-23F23. | -0,045075779 | -0,04741053  | 0 | N.A. | 0 |
| RP11-166B2. | -0,045079747 | -0,109979754 | 0 | N.A. | 0 |
| NCOA7       | -0,045090484 | 0,042348124  | 0 | N.A. | 0 |
| AP001059.7  | -0,045100996 |              | 0 | N.A. | 0 |
| RP11-571L19 | -0,045131271 | -0,269912478 | 0 | N.A. | 0 |
| RP11-551L14 | -0,045154186 | -0,153153926 | 0 | N.A. | 0 |
| MMRN1       | -0,045161201 |              | 0 | N.A. | 0 |
| ING1        | -0,045179468 | 0,221979533  | 0 | N.A. | 0 |
| TNFSF13     | -0,045215246 | 0,307483151  | 0 | N.A. | 0 |
| KLRB1       | -0,045250703 | -0,026688319 | 0 | N.A. | 0 |
| GADD45A     | -0,045251651 | 0,252406472  | 0 | N.A. | 0 |
| ZNF658      | -0,045268786 | 0,118450246  | 0 | N.A. | 0 |
| F8          | -0,045322847 | -0,229476418 | 0 | N.A. | 0 |
| FAM195B     | -0,045333398 | -0,134785701 | 0 | N.A. | 0 |
| TMEM110     | -0,045337591 | -0,17424793  | 0 | N.A. | 0 |
| LENG8-AS1   | -0,045345568 | 0,082688073  | 0 | N.A. | 0 |
| RP11-25K19. | -0,045362914 | -0,09744263  | 0 | N.A. | 0 |
| RP11-127B20 | -0,045394548 | 0,014254553  | 0 | N.A. | 0 |
| IL16        | -0,045394737 | -0,311758011 | 0 | N.A. | 0 |
| TMEM132C    | -0,045405497 |              | 0 | N.A. | 0 |
| GNAO1       | -0,045415037 |              | 0 | N.A. | 0 |
| SETD1A      | -0,045429024 | -0,087321312 | 0 | N.A. | 0 |

|             |              |              |   |      |   |
|-------------|--------------|--------------|---|------|---|
| Z83844.1    | -0,045501486 | -0,026125815 | 0 | N.A. | 0 |
| RP11-722E23 | -0,045509393 | 0,113213266  | 0 | N.A. | 0 |
| WFIKKN1     | -0,045510239 | 0,23574981   | 0 | N.A. | 0 |
| DERL1       | -0,04553059  | 0,376727791  | 0 | N.A. | 0 |
| RP4-671G15  | -0,045573647 | 0,243625159  | 0 | N.A. | 0 |
| MANEA-AS1   | -0,04558479  | 0,119322343  | 0 | N.A. | 0 |
| GRK7        | -0,045628804 |              | 0 | N.A. | 0 |
| FGF9        | -0,045663834 | 0,101136562  | 0 | N.A. | 0 |
| AUH         | -0,045686745 | 0,188661198  | 0 | N.A. | 0 |
| RP11-538P18 | -0,04570499  | -0,199242293 | 0 | N.A. | 0 |
| ATP6V1E2    | -0,045717229 | -0,134483027 | 0 | N.A. | 0 |
| TBC1D19     | -0,045720402 | 0,190894929  | 0 | N.A. | 0 |
| BRICD5      | -0,045746606 | 0,152785669  | 0 | N.A. | 0 |
| LINC00881   | -0,045765846 | 0,368355053  | 0 | N.A. | 0 |
| FAM174B     | -0,045768582 | 0,305886867  | 0 | N.A. | 0 |
| FZD9        | -0,045771285 |              | 0 | N.A. | 0 |
| SMEK2       | -0,045809242 | -0,013464049 | 0 | N.A. | 0 |
| CCDC129     | -0,045812491 | -0,076385861 | 0 | N.A. | 0 |
| RP11-436D10 | -0,045815734 |              | 0 | N.A. | 0 |
| SDK2        | -0,045817895 |              | 0 | N.A. | 0 |
| IL10        | -0,045827347 |              | 0 | N.A. | 0 |
| SRCIN1      | -0,045828828 | 0,42894884   | 0 | N.A. | 0 |
| RCE1        | -0,045910532 | 0,481607532  | 0 | N.A. | 0 |
| MEGF9       | -0,045936596 | 0,151800515  | 0 | N.A. | 0 |
| LINC01134   | -0,045972966 | 0,066194142  | 0 | N.A. | 0 |
| TLE3        | -0,045974587 | 0,19951805   | 0 | N.A. | 0 |
| PELI3       | -0,045989562 | 0,044581665  | 0 | N.A. | 0 |
| DHRS11      | -0,046015032 | 0,08745402   | 0 | N.A. | 0 |
| AZIN1       | -0,046041161 | -0,209446338 | 0 | N.A. | 0 |
| ENO1-AS1    | -0,046070374 | -0,023369795 | 0 | N.A. | 0 |
| USP22       | -0,046084492 | 0,133035975  | 0 | N.A. | 0 |
| RP11-474G23 | -0,046159725 | -0,110193146 | 0 | N.A. | 0 |
| IGDCC3      | -0,046228329 |              | 0 | N.A. | 0 |



|              |              |              |   |      |   |
|--------------|--------------|--------------|---|------|---|
| MIXL1        | -0,046245521 | 0,304041626  | 0 | N.A. | 0 |
| KCNJ8        | -0,046259954 |              | 0 | N.A. | 0 |
| NCDN         | -0,046264206 | 0,120457164  | 0 | N.A. | 0 |
| RP11-434D9.  | -0,046336885 | 0,071269667  | 0 | N.A. | 0 |
| LINC01268    | -0,046339353 | 0,033241368  | 0 | N.A. | 0 |
| FAM228B      | -0,046346636 | -0,275743576 | 0 | N.A. | 0 |
| LINC00884    | -0,046348718 | -0,135227939 | 0 | N.A. | 0 |
| CLASRP       | -0,046357411 | 0,072327286  | 0 | N.A. | 0 |
| RP11-890B15  | -0,046412367 | 0,311516488  | 0 | N.A. | 0 |
| RGL4         | -0,046432357 | 0,312823144  | 0 | N.A. | 0 |
| TCTA         | -0,046437072 | -0,354284928 | 0 | N.A. | 0 |
| STK11IP      | -0,046456654 | 0,148287735  | 0 | N.A. | 0 |
| KCNN1        | -0,04646125  |              | 0 | N.A. | 0 |
| PCOLCE       | -0,04648895  | -0,219343561 | 0 | N.A. | 0 |
| RP11-867G2.  | -0,046503906 | 0,09469126   | 0 | N.A. | 0 |
| CTA-384D8.3  | -0,046528323 |              | 0 | N.A. | 0 |
| CTD-2588C8.  | -0,0465536   | 0,031177597  | 0 | N.A. | 0 |
| RP11-428J1.5 | -0,046569395 |              | 0 | N.A. | 0 |
| ASNS         | -0,046591902 | -0,080616532 | 0 | N.A. | 0 |
| ESYT1        | -0,046619652 | 0,333899526  | 0 | N.A. | 0 |
| AC009506.1   | -0,04662611  | -0,176831191 | 0 | N.A. | 0 |
| ESPNL        | -0,046627574 | -0,190211508 | 0 | N.A. | 0 |
| CRADD        | -0,046627846 | -0,308831006 | 0 | N.A. | 0 |
| IWS1         | -0,046646069 | 0,141209855  | 0 | N.A. | 0 |
| RP11-52J3.2  | -0,046647037 |              | 0 | N.A. | 0 |
| LRIT3        | -0,046663751 | -0,164400728 | 0 | N.A. | 0 |
| RP11-435O5.  | -0,046684706 | -0,038096577 | 0 | N.A. | 0 |
| RP11-303E16  | -0,04669231  | -0,051750319 | 0 | N.A. | 0 |
| KIAA0125     | -0,046694943 | -0,183041667 | 0 | N.A. | 0 |
| DTX3         | -0,046711141 | -0,263475201 | 0 | N.A. | 0 |
| PMF1-BGLAP   | -0,046714776 | -0,284599019 | 0 | N.A. | 0 |
| BBS9         | -0,046718268 | 0,047596837  | 0 | N.A. | 0 |
| VPREB3       | -0,04671859  | -0,312336614 | 0 | N.A. | 0 |

|             |              |              |   |      |   |
|-------------|--------------|--------------|---|------|---|
| GPATCH3     | -0,046748964 | -0,014658091 | 0 | N.A. | 0 |
| EPS15L1     | -0,046764038 | -0,148448709 | 0 | N.A. | 0 |
| MED25       | -0,046844094 | 0,215633228  | 0 | N.A. | 0 |
| AC129492.6  | -0,046857525 | 0,036608357  | 0 | N.A. | 0 |
| SLC43A2     | -0,046882655 | -0,04618811  | 0 | N.A. | 0 |
| FKBP15      | -0,046909412 | 0,241071128  | 0 | N.A. | 0 |
| RP11-791G15 | -0,046914605 | 0,112794675  | 0 | N.A. | 0 |
| SPEF1       | -0,046925733 | -0,095606033 | 0 | N.A. | 0 |
| ZNF772      | -0,046980625 |              | 0 | N.A. | 0 |
| PCBP3       | -0,046984006 | -0,193402557 | 0 | N.A. | 0 |
| TTC39C      | -0,046990334 | -0,264461449 | 0 | N.A. | 0 |
| HCG18       | -0,047027006 | -0,207074995 | 0 | N.A. | 0 |
| LRRC27      | -0,047030808 | -0,128122612 | 0 | N.A. | 0 |
| IFI30       | -0,04703806  | 0,215438738  | 0 | N.A. | 0 |
| ZNF850      | -0,047049335 | -0,169490963 | 0 | N.A. | 0 |
| CCT6B       | -0,047120687 | -0,002376547 | 0 | N.A. | 0 |
| RP11-496D24 | -0,047164543 | 0,123119172  | 0 | N.A. | 0 |
| HELB        | -0,04719223  | -0,188332762 | 0 | N.A. | 0 |
| TBKBP1      | -0,047204945 | 0,201500479  | 0 | N.A. | 0 |
| PDCD10      | -0,047211545 | -0,069697441 | 0 | N.A. | 0 |
| LYPD6       | -0,047237508 | -0,176898129 | 0 | N.A. | 0 |
| POTEC       | -0,047241512 | -0,14565648  | 0 | N.A. | 0 |
| ZZZ3        | -0,047255174 | -0,190715395 | 0 | N.A. | 0 |
| GPANK1      | -0,047304409 | -0,294229116 | 0 | N.A. | 0 |
| PIGH        | -0,047310847 | 0,159588484  | 0 | N.A. | 0 |
| TTY15       | -0,047327584 | 0,113046798  | 0 | N.A. | 0 |
| MLH3        | -0,047328458 | 0,122362993  | 0 | N.A. | 0 |
| LMO7-AS1    | -0,047328857 | 0,010753234  | 0 | N.A. | 0 |
| JPH4        | -0,047424695 | 0,031578778  | 0 | N.A. | 0 |
| SLC2A2      | -0,047428309 | 0,058008352  | 0 | N.A. | 0 |
| WDR72       | -0,047468324 | -0,044336035 | 0 | N.A. | 0 |
| RALY-AS1    | -0,047472308 | -0,037092355 | 0 | N.A. | 0 |
| RP11-73K9.2 | -0,047489127 | -0,001802442 | 0 | N.A. | 0 |

|              |              |              |   |      |   |
|--------------|--------------|--------------|---|------|---|
| RP11-306I1.2 | -0,047517168 | 0,185957301  | 0 | N.A. | 0 |
| LILRB3       | -0,047520156 | 0,061965224  | 0 | N.A. | 0 |
| RP4-790G17.  | -0,047562577 | 0,140134487  | 0 | N.A. | 0 |
| CCL19        | -0,047619486 | -0,349805407 | 0 | N.A. | 0 |
| PRR5         | -0,047627889 | 0,028459764  | 0 | N.A. | 0 |
| CCDC173      | -0,047636448 | -0,199909019 | 0 | N.A. | 0 |
| RP11-316O14  | -0,047654008 | -0,016571673 | 0 | N.A. | 0 |
| TMEM116      | -0,047658422 | -0,146954698 | 0 | N.A. | 0 |
| CSTA         | -0,047702527 | -0,245026463 | 0 | N.A. | 0 |
| HMG20A       | -0,047702832 | 0,013193969  | 0 | N.A. | 0 |
| SMYD1        | -0,047708138 |              | 0 | N.A. | 0 |
| GLB1L3       | -0,047768041 |              | 0 | N.A. | 0 |
| GNA14        | -0,047781383 | -0,292269477 | 0 | N.A. | 0 |
| PRICKLE2-AS  | -0,047791624 | -0,144003339 | 0 | N.A. | 0 |
| RP11-77P16.  | -0,047821159 | -0,084956434 | 0 | N.A. | 0 |
| MYADM12      | -0,047848402 | 0,17481047   | 0 | N.A. | 0 |
| GSTCD        | -0,047848719 | -0,06432798  | 0 | N.A. | 0 |
| SRP54        | -0,047887805 | 0,176452224  | 0 | N.A. | 0 |
| MATN2        | -0,047913081 | 0,043975735  | 0 | N.A. | 0 |
| TRAPPC13     | -0,047916479 | -0,158018812 | 0 | N.A. | 0 |
| KPNA6        | -0,047967761 | 0,489395546  | 0 | N.A. | 0 |
| CXCL2        | -0,047968731 | 0,136399595  | 0 | N.A. | 0 |
| SMC5         | -0,047974873 | 0,073679458  | 0 | N.A. | 0 |
| TMEM35       | -0,047977936 |              | 0 | N.A. | 0 |
| RAB28        | -0,048024565 | -0,092295418 | 0 | N.A. | 0 |
| PEX16        | -0,048068539 | -0,039588759 | 0 | N.A. | 0 |
| RP11-109M1   | -0,048075798 | -0,036985729 | 0 | N.A. | 0 |
| BCO2         | -0,048104308 | 0,003634402  | 0 | N.A. | 0 |
| MMP11        | -0,048121365 | -0,196590279 | 0 | N.A. | 0 |
| CTD-2020K17  | -0,048183568 | -0,162787489 | 0 | N.A. | 0 |
| MTRR         | -0,048213241 | -0,112182575 | 0 | N.A. | 0 |
| ADPRH        | -0,048214209 | -0,108096831 | 0 | N.A. | 0 |
| LYPLA2       | -0,048284588 | 0,42892016   | 0 | N.A. | 0 |

|             |              |              |   |      |   |
|-------------|--------------|--------------|---|------|---|
| EDARADD     | -0,048292353 | -0,243922322 | 0 | N.A. | 0 |
| RP11-216B9. | -0,048376731 | 0,24311684   | 0 | N.A. | 0 |
| CGA         | -0,048380653 |              | 0 | N.A. | 0 |
| SLITRK5     | -0,048440625 |              | 0 | N.A. | 0 |
| PLIN1       | -0,048488109 |              | 0 | N.A. | 0 |
| CTD-2027I19 | -0,048494664 | -0,258148003 | 0 | N.A. | 0 |
| RP11-80H5.7 | -0,048507546 |              | 0 | N.A. | 0 |
| UBE4B       | -0,048513334 | -0,198336407 | 0 | N.A. | 0 |
| RP11-166B2. | -0,048539796 | -0,010739222 | 0 | N.A. | 0 |
| ZNF546      | -0,048544376 | -0,058638398 | 0 | N.A. | 0 |
| RP1-20C7.6  | -0,04855963  |              | 0 | N.A. | 0 |
| RP11-6B4.1  | -0,04863581  | -0,012476491 | 0 | N.A. | 0 |
| CSF3        | -0,048643833 | -0,063707002 | 0 | N.A. | 0 |
| LCN8        | -0,048726746 |              | 0 | N.A. | 0 |
| DMPK        | -0,048805525 | -0,000949514 | 0 | N.A. | 0 |
| SRRD        | -0,048816496 | 0,10867541   | 0 | N.A. | 0 |
| AP4S1       | -0,048820701 | 0,062018009  | 0 | N.A. | 0 |
| ZNF283      | -0,04883519  | 0,12747402   | 0 | N.A. | 0 |
| GDPD5       | -0,048856693 | 0,065194909  | 0 | N.A. | 0 |
| AP000654.4  | -0,048914142 |              | 0 | N.A. | 0 |
| ASIC2       | -0,04891875  | -0,200807866 | 0 | N.A. | 0 |
| RP1-234P15. | -0,0489377   | -0,076779856 | 0 | N.A. | 0 |
| VPS54       | -0,049038006 | -0,001183246 | 0 | N.A. | 0 |
| LINC00323   | -0,049065017 | -0,055509452 | 0 | N.A. | 0 |
| CTD-2517O1  | -0,049100165 | 0,077333607  | 0 | N.A. | 0 |
| XXbac-BPG29 | -0,049104493 | -0,021477036 | 0 | N.A. | 0 |
| AP1S2       | -0,049167517 | -0,199596488 | 0 | N.A. | 0 |
| IL37        | -0,049190401 | 0,196850394  | 0 | N.A. | 0 |
| ZNF251      | -0,049314083 | 0,332342267  | 0 | N.A. | 0 |
| TAF12       | -0,04931888  | -0,044614394 | 0 | N.A. | 0 |
| RP11-263K19 | -0,04933975  | -0,117878812 | 0 | N.A. | 0 |
| ZCCHC8      | -0,04936743  | 0,02973925   | 0 | N.A. | 0 |
| COL8A2      | -0,049373244 | -0,046439839 | 0 | N.A. | 0 |

|              |              |              |   |      |   |
|--------------|--------------|--------------|---|------|---|
| BNC2         | -0,049376426 | 0,312427088  | 0 | N.A. | 0 |
| ZHX3         | -0,049432279 | 0,212676148  | 0 | N.A. | 0 |
| EGFL8        | -0,049432794 | 0,324399721  | 0 | N.A. | 0 |
| C6orf3       | -0,049479113 | 0,013067842  | 0 | N.A. | 0 |
| MTUS2-AS1    | -0,049482744 | 0,068385814  | 0 | N.A. | 0 |
| PPP1R26-AS1  | -0,049577042 | -0,072312856 | 0 | N.A. | 0 |
| HAUS3        | -0,049579322 | 0,177554018  | 0 | N.A. | 0 |
| RTN3         | -0,049588482 | 0,279117313  | 0 | N.A. | 0 |
| GPSM3        | -0,0495936   | -0,360770009 | 0 | N.A. | 0 |
| SYMPK        | -0,04963171  | 0,02414813   | 0 | N.A. | 0 |
| RAP2A        | -0,049636096 | 0,394877244  | 0 | N.A. | 0 |
| LA16c-321D4  | -0,04965697  | 0,016523739  | 0 | N.A. | 0 |
| ALG12        | -0,049680725 | 0,024705227  | 0 | N.A. | 0 |
| RP11-160E2.  | -0,049732808 | 0,153884489  | 0 | N.A. | 0 |
| RAPGEF4      | -0,049769636 | -0,244763223 | 0 | N.A. | 0 |
| GRPEL2       | -0,049813976 | 0,026843309  | 0 | N.A. | 0 |
| KATNAL2      | -0,049836591 |              | 0 | N.A. | 0 |
| IL7          | -0,049847656 | -0,009556579 | 0 | N.A. | 0 |
| RP11-480A16  | -0,049851571 | 0,024635937  | 0 | N.A. | 0 |
| RP11-95D17.  | -0,049858178 | 0,036701147  | 0 | N.A. | 0 |
| TRAF7        | -0,049898811 | -0,149924398 | 0 | N.A. | 0 |
| HIST1H2AL    | -0,049935132 | -0,259500543 | 0 | N.A. | 0 |
| RP11-304L19  | -0,049970712 | 0,452944244  | 0 | N.A. | 0 |
| LGALS7       | -0,049984577 |              | 0 | N.A. | 0 |
| CD53         | -0,049996245 | -0,177027414 | 0 | N.A. | 0 |
| PUS10        | -0,049997706 | 0,180340187  | 0 | N.A. | 0 |
| EYA2         | -0,049998793 |              | 0 | N.A. | 0 |
| RP4-597N16.  | -0,050007939 | 0,105174518  | 0 | N.A. | 0 |
| RBM11        | -0,05001316  | -0,118187351 | 0 | N.A. | 0 |
| PI4KB        | -0,050036096 | 0,104616359  | 0 | N.A. | 0 |
| IGKV1-6      | -0,050117362 | -0,331221377 | 0 | N.A. | 0 |
| F10          | -0,050138139 | 0,348228445  | 0 | N.A. | 0 |
| RP3-492J12.2 | -0,050185713 |              | 0 | N.A. | 0 |

|              |              |              |   |      |   |
|--------------|--------------|--------------|---|------|---|
| PCK1         | -0,050256912 | 0,060901812  | 0 | N.A. | 0 |
| CTB-161C1.1  | -0,050282766 | 0,163064082  | 0 | N.A. | 0 |
| FDX1         | -0,050336044 | 0,108916937  | 0 | N.A. | 0 |
| LINC00680    | -0,050406502 | -0,111718553 | 0 | N.A. | 0 |
| SFT2D2       | -0,050439762 | 0,159832012  | 0 | N.A. | 0 |
| AC002076.10  | -0,050481142 | 0,067930874  | 0 | N.A. | 0 |
| CHKB-AS1     | -0,050483881 | -0,289381084 | 0 | N.A. | 0 |
| CEP112       | -0,050515709 | -0,105599012 | 0 | N.A. | 0 |
| AC072062.1   | -0,050522995 |              | 0 | N.A. | 0 |
| RP11-706P11  | -0,050561663 |              | 0 | N.A. | 0 |
| RP11-360L9.7 | -0,050589495 | 0,193759509  | 0 | N.A. | 0 |
| ARL6IP1      | -0,050609387 | 0,01759371   | 0 | N.A. | 0 |
| C1orf168     | -0,050730731 | -0,107458933 | 0 | N.A. | 0 |
| KLHL35       | -0,05074402  | -0,074524947 | 0 | N.A. | 0 |
| RP11-359E10  | -0,050744312 | -0,027498033 | 0 | N.A. | 0 |
| ZNF773       | -0,050765154 | -0,103679539 | 0 | N.A. | 0 |
| CD3D         | -0,050784523 | -0,217976137 | 0 | N.A. | 0 |
| RP11-494H4.  | -0,050802578 |              | 0 | N.A. | 0 |
| MS4A7        | -0,050812842 | -0,169393736 | 0 | N.A. | 0 |
| RP11-21A7A.  | -0,050823327 | -0,164490617 | 0 | N.A. | 0 |
| AOC2         | -0,050847106 | 0,028201298  | 0 | N.A. | 0 |
| ING2         | -0,050851844 | 0,330577984  | 0 | N.A. | 0 |
| PTGDR2       | -0,050856361 | -0,088195983 | 0 | N.A. | 0 |
| BLOC1S6      | -0,050860507 | 0,173026678  | 0 | N.A. | 0 |
| CCDC142      | -0,050867604 | -0,012122295 | 0 | N.A. | 0 |
| ALOX5AP      | -0,050870081 | -0,288064017 | 0 | N.A. | 0 |
| RP11-464F9.  | -0,050885019 | 0,012174677  | 0 | N.A. | 0 |
| PAXBP1-AS1   | -0,050911576 | -0,085932738 | 0 | N.A. | 0 |
| ETNK1        | -0,050951565 | 0,243885893  | 0 | N.A. | 0 |
| KLHL18       | -0,050962931 | -0,480125416 | 0 | N.A. | 0 |
| MYH10        | -0,051008338 | -0,202601377 | 0 | N.A. | 0 |
| C17orf104    | -0,051025226 | 0,035589043  | 0 | N.A. | 0 |
| SBDS         | -0,051040884 | 0,107478606  | 0 | N.A. | 0 |

|             |              |              |   |      |   |
|-------------|--------------|--------------|---|------|---|
| SS18        | -0,051044532 | -0,046264424 | 0 | N.A. | 0 |
| U47924.29   | -0,051057996 | 0,362149408  | 0 | N.A. | 0 |
| VT11B       | -0,051108239 | -0,126739416 | 0 | N.A. | 0 |
| RP11-432B6. | -0,051133266 |              | 0 | N.A. | 0 |
| FGD3        | -0,051150055 | -0,319767363 | 0 | N.A. | 0 |
| LINC01540   | -0,051213856 | -0,238987647 | 0 | N.A. | 0 |
| RP11-138P22 | -0,05121807  |              | 0 | N.A. | 0 |
| CALHM2      | -0,05123232  | 0,061735315  | 0 | N.A. | 0 |
| AP001469.9  | -0,051247636 | -0,045368074 | 0 | N.A. | 0 |
| AGR2        | -0,05125736  | 0,091406596  | 0 | N.A. | 0 |
| EMB         | -0,05127871  | -0,327400913 | 0 | N.A. | 0 |
| LINC01209   | -0,051299554 | 0,144252029  | 0 | N.A. | 0 |
| HAR1B       | -0,05133877  | -0,086267063 | 0 | N.A. | 0 |
| GFPT2       | -0,051349776 | -0,026267043 | 0 | N.A. | 0 |
| BMP5        | -0,051378374 |              | 0 | N.A. | 0 |
| NR2F1       | -0,051381958 | -0,026806831 | 0 | N.A. | 0 |
| ARPIN       | -0,051388252 | 0,184727462  | 0 | N.A. | 0 |
| RP11-706O1  | -0,051392063 | 0,129551449  | 0 | N.A. | 0 |
| SLAMF1      | -0,051394488 | -0,105215345 | 0 | N.A. | 0 |
| SLC25A1     | -0,051405192 | 0,163822569  | 0 | N.A. | 0 |
| RRAGB       | -0,051421286 | -0,140774167 | 0 | N.A. | 0 |
| RP13-39P12. | -0,051433533 | -0,140473646 | 0 | N.A. | 0 |
| LYPD8       | -0,051463002 | -0,055881299 | 0 | N.A. | 0 |
| RP11-314C16 | -0,051478008 |              | 0 | N.A. | 0 |
| C14orf132   | -0,051485326 | 0,09590838   | 0 | N.A. | 0 |
| MRC1        | -0,051520778 | 0,036920301  | 0 | N.A. | 0 |
| FAM50B      | -0,051521633 | -0,036679502 | 0 | N.A. | 0 |
| HIST1H2AG   | -0,051608226 | -0,170089653 | 0 | N.A. | 0 |
| PCDHGA6     | -0,051634608 | -0,023957696 | 0 | N.A. | 0 |
| CEP128      | -0,051670299 | -0,315749351 | 0 | N.A. | 0 |
| ATP1A3      | -0,051699258 | -0,115218195 | 0 | N.A. | 0 |
| HIST1H2BI   | -0,051727561 | -0,237225992 | 0 | N.A. | 0 |
| CCNJL       | -0,05181178  | -0,120623354 | 0 | N.A. | 0 |

|             |              |              |   |      |   |
|-------------|--------------|--------------|---|------|---|
| PDE3B       | -0,051818394 | -0,11142058  | 0 | N.A. | 0 |
| UNC119      | -0,051827257 | -0,19127062  | 0 | N.A. | 0 |
| EPOR        | -0,051898316 | -0,01863027  | 0 | N.A. | 0 |
| OVOL2       | -0,051904102 | 0,133994086  | 0 | N.A. | 0 |
| ATP8A2      | -0,051910538 | -0,271446322 | 0 | N.A. | 0 |
| CHST10      | -0,051921328 | 0,042545689  | 0 | N.A. | 0 |
| CDH24       | -0,051947542 | 0,072625996  | 0 | N.A. | 0 |
| C9orf163    | -0,051957938 |              | 0 | N.A. | 0 |
| RP11-102N1  | -0,051984329 | 0,015060511  | 0 | N.A. | 0 |
| CDK10       | -0,051996401 | 0,32720462   | 0 | N.A. | 0 |
| CTC-378H22  | -0,052044397 |              | 0 | N.A. | 0 |
| RP11-415C15 | -0,052044397 |              | 0 | N.A. | 0 |
| C9orf135    | -0,052086404 |              | 0 | N.A. | 0 |
| ZNF383      | -0,052111232 | -0,052737623 | 0 | N.A. | 0 |
| CYP2E1      | -0,052199676 | 0,142587601  | 0 | N.A. | 0 |
| SERP2       | -0,052250991 | -0,141735129 | 0 | N.A. | 0 |
| CTA-212A2.2 | -0,052252331 | -0,227052952 | 0 | N.A. | 0 |
| LRRN3       | -0,052304777 |              | 0 | N.A. | 0 |
| HAGH        | -0,052336996 | 0,229491681  | 0 | N.A. | 0 |
| RP11-114F3  | -0,052337662 |              | 0 | N.A. | 0 |
| YBEY        | -0,052346937 | -0,045743016 | 0 | N.A. | 0 |
| LINC00184   | -0,052350255 |              | 0 | N.A. | 0 |
| MAPK4       | -0,052404953 |              | 0 | N.A. | 0 |
| TRAF3IP2-AS | -0,0524165   | -0,039498739 | 0 | N.A. | 0 |
| MAPKAP1     | -0,05243233  | -0,177671213 | 0 | N.A. | 0 |
| RP11-1275H  | -0,052436133 | -0,047499468 | 0 | N.A. | 0 |
| FAM210A     | -0,052446949 | 0,164107327  | 0 | N.A. | 0 |
| LIPE        | -0,052539454 | 0,015887685  | 0 | N.A. | 0 |
| RP11-644F5  | -0,052546041 | 0,076686535  | 0 | N.A. | 0 |
| PRKAB1      | -0,052570351 | 0,348114482  | 0 | N.A. | 0 |
| CTD-2568A1  | -0,052574413 | 0,237110685  | 0 | N.A. | 0 |
| ZNF280D     | -0,052586767 | 0,056909563  | 0 | N.A. | 0 |
| RP11-231I16 | -0,052603558 |              | 0 | N.A. | 0 |



|             |              |              |   |      |   |
|-------------|--------------|--------------|---|------|---|
| TWIST1      | -0,052609942 |              | 0 | N.A. | 0 |
| CYB5D1      | -0,052639299 | -0,033786742 | 0 | N.A. | 0 |
| RP11-46C24. | -0,052655108 | -0,0315157   | 0 | N.A. | 0 |
| CNIH3       | -0,052677931 | 0,004787804  | 0 | N.A. | 0 |
| AF131216.1  | -0,052701706 | 0,144528093  | 0 | N.A. | 0 |
| CRYBB2      | -0,052741579 | -0,001506573 | 0 | N.A. | 0 |
| TBX18       | -0,052742099 | 0,050032358  | 0 | N.A. | 0 |
| XX-FW83563  | -0,052754558 | 0,042961784  | 0 | N.A. | 0 |
| ACRBP       | -0,052758362 | -0,19551824  | 0 | N.A. | 0 |
| CTD-2371O3  | -0,052774945 | -0,098114163 | 0 | N.A. | 0 |
| KIAA1598    | -0,052794586 | -0,01119953  | 0 | N.A. | 0 |
| RP11-440L14 | -0,052837968 | 0,012906369  | 0 | N.A. | 0 |
| SLC23A1     | -0,052881703 | 0,14614218   | 0 | N.A. | 0 |
| RP11-31F15. | -0,052945372 | -0,025234084 | 0 | N.A. | 0 |
| CDC20B      | -0,052967646 |              | 0 | N.A. | 0 |
| INTS3       | -0,052978249 | 0,071732364  | 0 | N.A. | 0 |
| TLR1        | -0,053029409 | -0,092816783 | 0 | N.A. | 0 |
| ZNF648      | -0,05305447  |              | 0 | N.A. | 0 |
| PITPNB      | -0,0531      | -0,127993274 | 0 | N.A. | 0 |
| RP5-858B6.3 | -0,053100297 |              | 0 | N.A. | 0 |
| RP1-198K11. | -0,053110793 | -0,171039764 | 0 | N.A. | 0 |
| FNTB        | -0,053110832 | 0,003201672  | 0 | N.A. | 0 |
| NXPH3       | -0,053115675 |              | 0 | N.A. | 0 |
| RP11-352G9. | -0,053149434 | 0,235492783  | 0 | N.A. | 0 |
| HSD17B13    | -0,053185742 | 0,101157682  | 0 | N.A. | 0 |
| TSACC       | -0,053195757 | -0,074693833 | 0 | N.A. | 0 |
| SIRT4       | -0,053205627 | 0,023879631  | 0 | N.A. | 0 |
| HIST1H2BN   | -0,053214329 | -0,237035746 | 0 | N.A. | 0 |
| HTR2A       | -0,053247829 |              | 0 | N.A. | 0 |
| WDR63       | -0,053248568 | 0,058828896  | 0 | N.A. | 0 |
| LINC00167   | -0,053249641 | -0,018107382 | 0 | N.A. | 0 |
| ZNF551      | -0,053257351 | 0,11822054   | 0 | N.A. | 0 |
| LOH12CR1    | -0,053308969 | -0,349240794 | 0 | N.A. | 0 |

|              |              |              |   |      |   |
|--------------|--------------|--------------|---|------|---|
| SAMD15       | -0,053461123 | -0,284507096 | 0 | N.A. | 0 |
| KCNMB2       | -0,053480646 | 0,257326007  | 0 | N.A. | 0 |
| RP4-561L24.1 | -0,053499022 | 0,038322605  | 0 | N.A. | 0 |
| DACT3        | -0,053518473 | 0,26841577   | 0 | N.A. | 0 |
| CST4         | -0,053533705 | -0,268799474 | 0 | N.A. | 0 |
| CTD-2529O2   | -0,05360665  |              | 0 | N.A. | 0 |
| RP11-540A21  | -0,053632845 | 0,156800498  | 0 | N.A. | 0 |
| AC079922.3   | -0,053634419 | -0,033983838 | 0 | N.A. | 0 |
| RP11-284F21  | -0,05364762  | -0,06958774  | 0 | N.A. | 0 |
| ZNF833P      | -0,053658982 | -0,161099524 | 0 | N.A. | 0 |
| CRB2         | -0,053691648 | -0,032085972 | 0 | N.A. | 0 |
| HCK          | -0,053708966 | -0,136742005 | 0 | N.A. | 0 |
| RP13-516M1   | -0,053713105 | 0,177790994  | 0 | N.A. | 0 |
| EFR3B        | -0,053780341 | 0,039664825  | 0 | N.A. | 0 |
| FMOD         | -0,053786909 | -0,237699629 | 0 | N.A. | 0 |
| CYB5R4       | -0,053794269 | -0,080938997 | 0 | N.A. | 0 |
| TFIP11       | -0,053803143 | 0,031827166  | 0 | N.A. | 0 |
| CTC-231O11.1 | -0,053810594 | 0,177757624  | 0 | N.A. | 0 |
| ROGDI        | -0,053829747 | 0,266123671  | 0 | N.A. | 0 |
| HOXA5        | -0,053840343 | -0,031094038 | 0 | N.A. | 0 |
| SLC22A2      | -0,053844672 | -0,036837214 | 0 | N.A. | 0 |
| PQLC2L       | -0,053850222 | 0,107473348  | 0 | N.A. | 0 |
| ZCCHC3       | -0,05388996  | -0,007026983 | 0 | N.A. | 0 |
| RP11-17J14.2 | -0,053913259 | 0,039328624  | 0 | N.A. | 0 |
| RP11-560J1.2 | -0,053917121 | -0,288367417 | 0 | N.A. | 0 |
| RP5-1057J7.7 | -0,054006226 | -0,147290646 | 0 | N.A. | 0 |
| JUNB         | -0,054024101 | 0,511385     | 0 | N.A. | 0 |
| GAS7         | -0,054051508 | -0,238141215 | 0 | N.A. | 0 |
| CPA5         | -0,054058422 | -0,088758096 | 0 | N.A. | 0 |
| AC100830.4   | -0,054090546 | 0,099005264  | 0 | N.A. | 0 |
| UHRF2        | -0,054135853 | -0,050209354 | 0 | N.A. | 0 |
| SOX15        | -0,054146854 |              | 0 | N.A. | 0 |
| SPATA6       | -0,054161572 | 0,053370096  | 0 | N.A. | 0 |

|             |              |              |   |      |   |
|-------------|--------------|--------------|---|------|---|
| C12orf56    | -0,054169066 | -0,095693475 | 0 | N.A. | 0 |
| STT3B       | -0,054289042 | 0,242887855  | 0 | N.A. | 0 |
| C1orf87     | -0,054290021 |              | 0 | N.A. | 0 |
| AHSG        | -0,054293336 | 0,181892388  | 0 | N.A. | 0 |
| RP1-302G2.5 | -0,05436174  |              | 0 | N.A. | 0 |
| MYO10       | -0,054379293 | 0,17381888   | 0 | N.A. | 0 |
| GSR         | -0,05438176  | -0,227841021 | 0 | N.A. | 0 |
| GRIK4       | -0,054431882 |              | 0 | N.A. | 0 |
| ZNF84       | -0,054443199 | 0,111994127  | 0 | N.A. | 0 |
| C9orf117    | -0,054474418 | 0,052950807  | 0 | N.A. | 0 |
| SLC38A4     | -0,054479132 | 0,016839355  | 0 | N.A. | 0 |
| PRDM13      | -0,054479413 | -0,037059929 | 0 | N.A. | 0 |
| GTSE1-AS1   | -0,054495389 | -0,188654855 | 0 | N.A. | 0 |
| VAC14       | -0,054518406 | 0,046532414  | 0 | N.A. | 0 |
| ZNF416      | -0,054526758 | 0,175477211  | 0 | N.A. | 0 |
| ARMCX5      | -0,054583493 | -0,203832726 | 0 | N.A. | 0 |
| CAPN13      | -0,05458759  | -0,132279904 | 0 | N.A. | 0 |
| VPS36       | -0,05459097  | 0,097804756  | 0 | N.A. | 0 |
| SLC29A2     | -0,054633001 | 0,185723271  | 0 | N.A. | 0 |
| DUSP26      | -0,054644497 |              | 0 | N.A. | 0 |
| KIF26A      | -0,054645543 | -0,107871212 | 0 | N.A. | 0 |
| RP11-689C9. | -0,054673668 |              | 0 | N.A. | 0 |
| CTD-2013N1  | -0,054724715 | 0,161314459  | 0 | N.A. | 0 |
| ALG9        | -0,054729575 | -0,010382703 | 0 | N.A. | 0 |
| RAB7A       | -0,054787225 | -0,069295385 | 0 | N.A. | 0 |
| RCAN2       | -0,054835163 | -0,096532152 | 0 | N.A. | 0 |
| EGR1        | -0,054843695 | 0,038204002  | 0 | N.A. | 0 |
| PLEKHG4     | -0,054849216 | 0,025390469  | 0 | N.A. | 0 |
| RP11-631F7. | -0,054926402 | 0,137817428  | 0 | N.A. | 0 |
| FGL1        | -0,054942593 |              | 0 | N.A. | 0 |
| SLC35E3     | -0,054951691 | 0,046420409  | 0 | N.A. | 0 |
| LA16c-385E7 | -0,054953894 | -0,027339268 | 0 | N.A. | 0 |
| LINC01127   | -0,054956631 | -0,096260115 | 0 | N.A. | 0 |

|             |              |              |   |      |   |
|-------------|--------------|--------------|---|------|---|
| LINC00959   | -0,054957502 | -0,020352169 | 0 | N.A. | 0 |
| HPS3        | -0,054963418 | -0,089347774 | 0 | N.A. | 0 |
| UROC1       | -0,054992461 | -0,068824098 | 0 | N.A. | 0 |
| WDFY2       | -0,054994214 | 0,048210906  | 0 | N.A. | 0 |
| EXOC2       | -0,054995307 | 0,120830924  | 0 | N.A. | 0 |
| RP11-519G10 | -0,054997962 | -0,228257868 | 0 | N.A. | 0 |
| AC005152.3  | -0,05503529  |              | 0 | N.A. | 0 |
| TRIM24      | -0,055049575 | -0,258299377 | 0 | N.A. | 0 |
| LINC00920   | -0,055071781 | -0,007993878 | 0 | N.A. | 0 |
| RP11-342K6. | -0,055103593 |              | 0 | N.A. | 0 |
| RP1-16A9.1  | -0,055119683 |              | 0 | N.A. | 0 |
| RP11-123K3. | -0,055148517 |              | 0 | N.A. | 0 |
| C11orf98    | -0,055149209 | -0,372285865 | 0 | N.A. | 0 |
| BRD3        | -0,055165448 | -0,065970552 | 0 | N.A. | 0 |
| AC007277.3  | -0,055219685 | 0,291989283  | 0 | N.A. | 0 |
| IGKV4-1     | -0,055230169 | -0,013093232 | 0 | N.A. | 0 |
| HPN         | -0,055245541 | 0,002320423  | 0 | N.A. | 0 |
| RRAGA       | -0,05526322  | -0,012724881 | 0 | N.A. | 0 |
| PPP1R37     | -0,055266566 | 0,171769244  | 0 | N.A. | 0 |
| GJA3        | -0,05530682  |              | 0 | N.A. | 0 |
| AP4B1-AS1   | -0,055309738 |              | 0 | N.A. | 0 |
| IL7R        | -0,055370093 | -0,004918953 | 0 | N.A. | 0 |
| NHLRC3      | -0,055434938 | 0,075018928  | 0 | N.A. | 0 |
| GSAP        | -0,055456047 | 0,278117089  | 0 | N.A. | 0 |
| GNB3        | -0,055516641 | -0,064338933 | 0 | N.A. | 0 |
| MAST4-AS1   | -0,055521244 | -0,333434642 | 0 | N.A. | 0 |
| RBBP5       | -0,055538876 | -0,082314329 | 0 | N.A. | 0 |
| POU6F1      | -0,055542211 | 0,191269711  | 0 | N.A. | 0 |
| RP11-484K9. | -0,055589132 | 0,008433379  | 0 | N.A. | 0 |
| SIDT1       | -0,055643169 | -0,001421861 | 0 | N.A. | 0 |
| RP4-593H12. | -0,055666097 | 0,145018128  | 0 | N.A. | 0 |
| CADM4       | -0,05566681  | 0,136123822  | 0 | N.A. | 0 |
| SKIDA1      | -0,055683188 | -0,083490092 | 0 | N.A. | 0 |

|             |              |              |   |      |   |
|-------------|--------------|--------------|---|------|---|
| SFRP2       | -0,0556978   | -0,331701956 | 0 | N.A. | 0 |
| MAT2B       | -0,055719752 | -0,320999653 | 0 | N.A. | 0 |
| UGDH        | -0,055741101 | 0,00442211   | 0 | N.A. | 0 |
| ZSCAN32     | -0,055741554 | 0,009132173  | 0 | N.A. | 0 |
| PRRC2C      | -0,055773182 | 0,457866253  | 0 | N.A. | 0 |
| ZC3H10      | -0,055791377 | -0,128565743 | 0 | N.A. | 0 |
| BECN1       | -0,055822433 | 0,097804638  | 0 | N.A. | 0 |
| RETNLB      | -0,05584091  | -0,296866511 | 0 | N.A. | 0 |
| TNS4        | -0,055846977 | 0,372542954  | 0 | N.A. | 0 |
| ZBTB10      | -0,055856366 | 0,08028584   | 0 | N.A. | 0 |
| LRRC36      | -0,055861242 | -0,169919632 | 0 | N.A. | 0 |
| RP11-51501  | -0,055868344 |              | 0 | N.A. | 0 |
| CRISPLD2    | -0,055939059 | -0,175060846 | 0 | N.A. | 0 |
| FZD4        | -0,055956887 | 0,05007691   | 0 | N.A. | 0 |
| MRI1        | -0,055963563 | -0,204183203 | 0 | N.A. | 0 |
| ZNF880      | -0,05597452  | 0,034701938  | 0 | N.A. | 0 |
| ZNF133      | -0,055980087 | -0,113176718 | 0 | N.A. | 0 |
| RP11-203B9. | -0,056010874 |              | 0 | N.A. | 0 |
| RP11-148B18 | -0,056022435 | 0,014959771  | 0 | N.A. | 0 |
| RBM18       | -0,056051462 | 0,042273476  | 0 | N.A. | 0 |
| AC017074.2  | -0,056058629 | -0,367764653 | 0 | N.A. | 0 |
| FPGT        | -0,056073415 | -0,043725764 | 0 | N.A. | 0 |
| RERG        | -0,056133418 |              | 0 | N.A. | 0 |
| RAB39B      | -0,056162972 | -0,058476831 | 0 | N.A. | 0 |
| MORF4L1     | -0,056170462 | 0,122729821  | 0 | N.A. | 0 |
| ABCA12      | -0,056188373 | 0,116458314  | 0 | N.A. | 0 |
| CLPS        | -0,056203547 |              | 0 | N.A. | 0 |
| GNG7        | -0,056208112 | -0,02028811  | 0 | N.A. | 0 |
| ARRB1       | -0,05622425  | 0,122001278  | 0 | N.A. | 0 |
| TCEAL3      | -0,056236473 | -0,070917217 | 0 | N.A. | 0 |
| NSF         | -0,056255406 | -0,167757874 | 0 | N.A. | 0 |
| PRUNE2      | -0,056291893 | 0,03172791   | 0 | N.A. | 0 |
| PRR4        | -0,056339254 | 0,058536235  | 0 | N.A. | 0 |

|             |              |              |   |      |   |
|-------------|--------------|--------------|---|------|---|
| UBOX5       | -0,056345448 | -0,055082273 | 0 | N.A. | 0 |
| PTH2        | -0,056358758 |              | 0 | N.A. | 0 |
| MYNN        | -0,056365222 | 0,084346077  | 0 | N.A. | 0 |
| KDELR2      | -0,056381673 | -0,082469797 | 0 | N.A. | 0 |
| ACR         | -0,056433099 | 0,065952873  | 0 | N.A. | 0 |
| CHP2        | -0,05647226  | 0,017664334  | 0 | N.A. | 0 |
| MIPOL1      | -0,056545175 | -0,22630541  | 0 | N.A. | 0 |
| THAP7-AS1   | -0,056566286 | -0,272191343 | 0 | N.A. | 0 |
| LINC00543   | -0,056595611 | 0,408195887  | 0 | N.A. | 0 |
| TRPM2-AS    | -0,056607289 | 0,01536188   | 0 | N.A. | 0 |
| RFWD3       | -0,056614042 | -0,081296126 | 0 | N.A. | 0 |
| AATBC       | -0,05664461  | -0,18412617  | 0 | N.A. | 0 |
| TMEM17      | -0,056645295 | 0,041219853  | 0 | N.A. | 0 |
| PARS2       | -0,056703071 | 0,087228877  | 0 | N.A. | 0 |
| AC004549.6  | -0,056707623 |              | 0 | N.A. | 0 |
| PPIL6       | -0,056708528 | -0,285669511 | 0 | N.A. | 0 |
| RP11-297N6. | -0,05672518  | -0,007376395 | 0 | N.A. | 0 |
| IGKV1-27    | -0,056796079 | -0,003684285 | 0 | N.A. | 0 |
| CTD-2152M2  | -0,056823616 |              | 0 | N.A. | 0 |
| AC002451.3  | -0,056847282 | 0,042360174  | 0 | N.A. | 0 |
| AP001058.3  | -0,056869644 | -0,177913346 | 0 | N.A. | 0 |
| AP006216.10 | -0,056873801 | 0,18479211   | 0 | N.A. | 0 |
| RP11-441O1. | -0,05687969  | 0,088231487  | 0 | N.A. | 0 |
| DYNLT1      | -0,056893289 | -0,096940485 | 0 | N.A. | 0 |
| STX6        | -0,056920466 | 0,055880589  | 0 | N.A. | 0 |
| AQP9        | -0,056945053 | -0,192574988 | 0 | N.A. | 0 |
| XXbac-BPG30 | -0,056950432 | -0,224154321 | 0 | N.A. | 0 |
| RP11-353N14 | -0,056954696 | 0,096846785  | 0 | N.A. | 0 |
| PYGO2       | -0,056962036 | -0,100522169 | 0 | N.A. | 0 |
| PLCXD3      | -0,056971035 |              | 0 | N.A. | 0 |
| RP1-267D11. | -0,057012036 | -0,239592204 | 0 | N.A. | 0 |
| KIF5C       | -0,057067765 | 0,068318156  | 0 | N.A. | 0 |
| UIMC1       | -0,057095801 | 0,149473342  | 0 | N.A. | 0 |

|             |              |              |   |      |   |
|-------------|--------------|--------------|---|------|---|
| CTD-2659N1  | -0,057130261 | -0,085408847 | 0 | N.A. | 0 |
| LZIC        | -0,057152785 | -0,297968686 | 0 | N.A. | 0 |
| ACTR3C      | -0,057168426 | 0,010233264  | 0 | N.A. | 0 |
| PYGL        | -0,057173983 | -0,110706409 | 0 | N.A. | 0 |
| DCHS1       | -0,057180553 | -0,031109234 | 0 | N.A. | 0 |
| RP11-80202  | -0,057197598 | 0,211362429  | 0 | N.A. | 0 |
| WASF1       | -0,057198858 | -0,059028237 | 0 | N.A. | 0 |
| RP11-147L13 | -0,057199467 | 0,075012447  | 0 | N.A. | 0 |
| AMDHD1      | -0,057234293 | -0,046665637 | 0 | N.A. | 0 |
| GJA1        | -0,057255938 | 0,104395225  | 0 | N.A. | 0 |
| RP5-991G20  | -0,05727468  | -0,072322052 | 0 | N.A. | 0 |
| KLHL15      | -0,057297763 | -0,212183568 | 0 | N.A. | 0 |
| RP11-680F20 | -0,057321361 |              | 0 | N.A. | 0 |
| NUP214      | -0,057323857 | 0,231826577  | 0 | N.A. | 0 |
| BTNL9       | -0,057331861 | 0,241205851  | 0 | N.A. | 0 |
| NKX3-1      | -0,057344332 | -0,051972085 | 0 | N.A. | 0 |
| NDNL2       | -0,057352766 | 0,17841579   | 0 | N.A. | 0 |
| ZNF766      | -0,057398785 | 0,109725187  | 0 | N.A. | 0 |
| RFX3        | -0,057440703 | 0,00654733   | 0 | N.A. | 0 |
| FDXACB1     | -0,057450472 | 0,031253347  | 0 | N.A. | 0 |
| PIK3IP1-AS1 | -0,057452212 | 0,032596962  | 0 | N.A. | 0 |
| CDKN2D      | -0,057472789 | -0,068463716 | 0 | N.A. | 0 |
| USHBP1      | -0,057492097 | 0,041146927  | 0 | N.A. | 0 |
| ACTRT3      | -0,057526709 | 0,080264317  | 0 | N.A. | 0 |
| PRICKLE4    | -0,057527139 | -0,284084576 | 0 | N.A. | 0 |
| ARSB        | -0,057528211 | 0,0120299    | 0 | N.A. | 0 |
| DBNDD2      | -0,057543049 | -0,071442857 | 0 | N.A. | 0 |
| SETSIP      | -0,05756028  | 0,119311545  | 0 | N.A. | 0 |
| DZIP1L      | -0,057561409 |              | 0 | N.A. | 0 |
| AP001412.1  | -0,05760031  | 0,029191109  | 0 | N.A. | 0 |
| RP11-680A1  | -0,057614357 |              | 0 | N.A. | 0 |
| E2F5        | -0,057653324 | -0,108060004 | 0 | N.A. | 0 |
| ZNF566      | -0,057667937 | 0,093611762  | 0 | N.A. | 0 |

|             |              |              |   |      |   |
|-------------|--------------|--------------|---|------|---|
| RP11-147L13 | -0,057713542 | 0,021888662  | 0 | N.A. | 0 |
| TNFSF4      | -0,05773346  | -0,080474895 | 0 | N.A. | 0 |
| TMUB1       | -0,057753241 | 0,428331381  | 0 | N.A. | 0 |
| IRX2        | -0,057817932 | 0,188023686  | 0 | N.A. | 0 |
| NAA35       | -0,05785235  | 0,173148531  | 0 | N.A. | 0 |
| AC001226.7  | -0,057853908 | -0,103179656 | 0 | N.A. | 0 |
| USPL1       | -0,057868137 | 0,250385184  | 0 | N.A. | 0 |
| LINC01479   | -0,057883163 |              | 0 | N.A. | 0 |
| CTD-2516F10 | -0,057932415 | 0,155530994  | 0 | N.A. | 0 |
| AC012360.4  | -0,057933795 | -0,185227956 | 0 | N.A. | 0 |
| TTC25       | -0,057973409 | 0,210774811  | 0 | N.A. | 0 |
| DDB2        | -0,058023149 | -0,170313248 | 0 | N.A. | 0 |
| ELF5        | -0,058108808 | -0,02002941  | 0 | N.A. | 0 |
| LPAR6       | -0,058126493 | -0,064401788 | 0 | N.A. | 0 |
| RP11-109N23 | -0,058145441 | 0,234225929  | 0 | N.A. | 0 |
| C6orf226    | -0,058180016 | 0,0340957    | 0 | N.A. | 0 |
| RP11-265N7. | -0,058190741 | -0,145952334 | 0 | N.A. | 0 |
| ACSF3       | -0,058217643 | 0,295745639  | 0 | N.A. | 0 |
| NIT1        | -0,058225221 | 0,027238449  | 0 | N.A. | 0 |
| CHRM3-AS2   | -0,05825673  |              | 0 | N.A. | 0 |
| PDE12       | -0,058263161 | -0,039800441 | 0 | N.A. | 0 |
| STARD5      | -0,058309135 | -0,031477375 | 0 | N.A. | 0 |
| RP11-302L19 | -0,058318156 | 0,025527421  | 0 | N.A. | 0 |
| ABHD6       | -0,058362338 | 0,127645848  | 0 | N.A. | 0 |
| CD300C      | -0,05840817  |              | 0 | N.A. | 0 |
| VWA8        | -0,058447039 | -0,112099709 | 0 | N.A. | 0 |
| VSTM4       | -0,058521277 | -0,227200158 | 0 | N.A. | 0 |
| RP11-142A22 | -0,058613262 |              | 0 | N.A. | 0 |
| RP4-666F24. | -0,058654034 | -0,043231967 | 0 | N.A. | 0 |
| P2RY11      | -0,058669737 | -0,003317283 | 0 | N.A. | 0 |
| RP1-257A7.5 | -0,058769888 | -0,00421056  | 0 | N.A. | 0 |
| RIPPLY3     | -0,058801656 | -0,029099781 | 0 | N.A. | 0 |
| PTCH1       | -0,058804772 | 0,281962542  | 0 | N.A. | 0 |



|             |              |              |   |      |   |
|-------------|--------------|--------------|---|------|---|
| TRIM16L     | -0,058817148 | 0,015278367  | 0 | N.A. | 0 |
| HAGLROS     | -0,05885896  | -0,160118528 | 0 | N.A. | 0 |
| KIF2A       | -0,058992243 | -0,008080477 | 0 | N.A. | 0 |
| LRRC37A2    | -0,059046492 | 0,098616893  | 0 | N.A. | 0 |
| RP11-210M1  | -0,059096059 |              | 0 | N.A. | 0 |
| KCNH6       | -0,059125161 | -0,185155523 | 0 | N.A. | 0 |
| ICE1        | -0,059159679 | 0,282639968  | 0 | N.A. | 0 |
| PTCHD1      | -0,059168474 |              | 0 | N.A. | 0 |
| ITFG1-AS1   | -0,059170114 |              | 0 | N.A. | 0 |
| CTB-47B11.3 | -0,059240412 | -0,019819473 | 0 | N.A. | 0 |
| CTD-3214H1  | -0,0592507   | 0,068795652  | 0 | N.A. | 0 |
| ZNF202      | -0,059324103 | 0,24249071   | 0 | N.A. | 0 |
| DEF6        | -0,059348621 | -0,058222577 | 0 | N.A. | 0 |
| LRRC31      | -0,059363639 | -0,220516039 | 0 | N.A. | 0 |
| HIST1H2AH   | -0,059499213 | -0,117781952 | 0 | N.A. | 0 |
| PRKCQ       | -0,059512229 |              | 0 | N.A. | 0 |
| FBXO18      | -0,059550812 | -0,028029463 | 0 | N.A. | 0 |
| RP11-490O6  | -0,059562324 | -0,053008559 | 0 | N.A. | 0 |
| RGMB-AS1    | -0,059583042 | 0,087998085  | 0 | N.A. | 0 |
| RP11-91K11. | -0,059607154 | -0,184047734 | 0 | N.A. | 0 |
| GPRC5B      | -0,059662895 | 0,121190957  | 0 | N.A. | 0 |
| CALML4      | -0,059687332 | 0,274928611  | 0 | N.A. | 0 |
| CACTIN      | -0,059690787 | 0,06427103   | 0 | N.A. | 0 |
| CKLF-CMTM1  | -0,059696329 | -0,125052138 | 0 | N.A. | 0 |
| AOC3        | -0,059711877 | -0,009499703 | 0 | N.A. | 0 |
| MATR3       | -0,059739005 | -0,482396136 | 0 | N.A. | 0 |
| MCM9        | -0,059740704 | -0,164328533 | 0 | N.A. | 0 |
| RP11-44F14. | -0,059762492 | -0,042494363 | 0 | N.A. | 0 |
| SEMA6C      | -0,059779823 | 0,11884159   | 0 | N.A. | 0 |
| RP11-379B18 | -0,059796496 | -0,220997912 | 0 | N.A. | 0 |
| GSC         | -0,059819947 |              | 0 | N.A. | 0 |
| CFAP45      | -0,059872201 | 0,031314541  | 0 | N.A. | 0 |
| KLHDC10     | -0,059885221 | 0,010332506  | 0 | N.A. | 0 |

|             |              |              |   |      |   |
|-------------|--------------|--------------|---|------|---|
| ITLN1       | -0,059912195 | -0,072496641 | 0 | N.A. | 0 |
| PNMA6A      | -0,059914169 |              | 0 | N.A. | 0 |
| EEF1G       | -0,059955434 | -0,423405205 | 0 | N.A. | 0 |
| PRPF18      | -0,059991043 | 0,17989123   | 0 | N.A. | 0 |
| RDH12       | -0,060005027 | -0,148885632 | 0 | N.A. | 0 |
| EHHADH      | -0,060010848 | -0,118201459 | 0 | N.A. | 0 |
| PDE1B       | -0,060042404 | 0,073655637  | 0 | N.A. | 0 |
| GATC        | -0,060060963 | -0,131518685 | 0 | N.A. | 0 |
| HIST1H3C    | -0,06007589  | -0,344237954 | 0 | N.A. | 0 |
| SAMD11      | -0,060087986 |              | 0 | N.A. | 0 |
| EML1        | -0,060101142 | 0,163110124  | 0 | N.A. | 0 |
| FAM49A      | -0,060132519 | -0,245162956 | 0 | N.A. | 0 |
| AC011997.1  | -0,060156422 | 0,058176961  | 0 | N.A. | 0 |
| S1PR2       | -0,060231646 | -0,170218197 | 0 | N.A. | 0 |
| SLC30A4     | -0,06024771  | -0,157466989 | 0 | N.A. | 0 |
| SH3BP1      | -0,060282425 | 0,083217623  | 0 | N.A. | 0 |
| FAN1        | -0,06029694  | -0,047225284 | 0 | N.A. | 0 |
| RP11-455F5. | -0,060328701 | -0,236325568 | 0 | N.A. | 0 |
| RP11-225H22 | -0,060354314 |              | 0 | N.A. | 0 |
| SHISA6      | -0,060391311 |              | 0 | N.A. | 0 |
| DLX6        | -0,060396249 | -0,073719042 | 0 | N.A. | 0 |
| FLOT2       | -0,060409792 | 0,034087315  | 0 | N.A. | 0 |
| HERC2       | -0,060459167 | 0,229367573  | 0 | N.A. | 0 |
| ZNF717      | -0,060492801 | -0,054427313 | 0 | N.A. | 0 |
| RP11-102M1  | -0,060522664 | -0,050044944 | 0 | N.A. | 0 |
| KCNIP2-AS1  | -0,060570762 | 0,153243867  | 0 | N.A. | 0 |
| CSPG5       | -0,060585749 | 0,155773757  | 0 | N.A. | 0 |
| TBCCD1      | -0,060616491 | -0,233034425 | 0 | N.A. | 0 |
| SYN3        | -0,060654346 | 0,13399773   | 0 | N.A. | 0 |
| RP11-231D20 | -0,060659679 |              | 0 | N.A. | 0 |
| RP11-798G7. | -0,060685058 | -0,008386951 | 0 | N.A. | 0 |
| FSCN3       | -0,06069284  | 0,015181645  | 0 | N.A. | 0 |
| SLC30A3     | -0,060707584 |              | 0 | N.A. | 0 |

|              |              |              |   |      |   |
|--------------|--------------|--------------|---|------|---|
| FKBP1C       | -0,060710225 | -0,332572451 | 0 | N.A. | 0 |
| RP11-458J1.1 | -0,060731125 | -0,067599182 | 0 | N.A. | 0 |
| RP11-152N13  | -0,060754254 | 0,027413861  | 0 | N.A. | 0 |
| CECR5-AS1    | -0,060758977 | 0,101756188  | 0 | N.A. | 0 |
| TCAF1        | -0,060783546 | 0,299397532  | 0 | N.A. | 0 |
| SULT1A4      | -0,060804879 | 0,006836738  | 0 | N.A. | 0 |
| MT-ND6       | -0,060810381 | 0,181918519  | 0 | N.A. | 0 |
| ELTD1        | -0,060953415 | -0,236142469 | 0 | N.A. | 0 |
| LINC01024    | -0,060991529 | 0,100797039  | 0 | N.A. | 0 |
| C1orf74      | -0,06106425  | -0,010328996 | 0 | N.A. | 0 |
| SUCLA2-AS1   | -0,061147254 | -0,053834883 | 0 | N.A. | 0 |
| BCAT1        | -0,061169093 | 0,107322253  | 0 | N.A. | 0 |
| C1QB         | -0,06120996  | 0,204305524  | 0 | N.A. | 0 |
| ROM1         | -0,061221507 | -0,323747085 | 0 | N.A. | 0 |
| RP11-474G23  | -0,061234551 | -0,127170368 | 0 | N.A. | 0 |
| LINC00339    | -0,061237076 | -0,266793237 | 0 | N.A. | 0 |
| ADCY3        | -0,061292898 | -0,036720194 | 0 | N.A. | 0 |
| LZTS2        | -0,061313349 | 0,052609946  | 0 | N.A. | 0 |
| RP11-390F4.1 | -0,061341892 | 0,08501013   | 0 | N.A. | 0 |
| MAEL         | -0,061348765 | 0,055669387  | 0 | N.A. | 0 |
| VSIG8        | -0,06136538  | -0,020506955 | 0 | N.A. | 0 |
| CCDC106      | -0,061373957 | -0,432627335 | 0 | N.A. | 0 |
| TMOD4        | -0,061383538 | 0,098905859  | 0 | N.A. | 0 |
| CTD-3193K9.1 | -0,061403454 | 0,11052362   | 0 | N.A. | 0 |
| NR2C1        | -0,061418545 | -0,107486386 | 0 | N.A. | 0 |
| ZSCAN26      | -0,06143099  | -0,153785128 | 0 | N.A. | 0 |
| CAMK1D       | -0,061448211 | -0,022912417 | 0 | N.A. | 0 |
| RP11-230C9.1 | -0,061489801 | -0,042337005 | 0 | N.A. | 0 |
| SLC4A10      | -0,061640791 |              | 0 | N.A. | 0 |
| FAM92B       | -0,061676047 |              | 0 | N.A. | 0 |
| EIF4ENIF1    | -0,061681357 | 0,148509867  | 0 | N.A. | 0 |
| RP11-752G15  | -0,061707892 | -0,018390052 | 0 | N.A. | 0 |
| MBTD1        | -0,061710685 | -0,022386954 | 0 | N.A. | 0 |

|             |              |              |   |      |   |
|-------------|--------------|--------------|---|------|---|
| SPTSSB      | -0,061760363 | 0,019651876  | 0 | N.A. | 0 |
| CCDC42B     | -0,061777894 | 0,078814971  | 0 | N.A. | 0 |
| MME         | -0,061822205 | 0,025240324  | 0 | N.A. | 0 |
| TVP23C-CDR  | -0,061839333 |              | 0 | N.A. | 0 |
| RABEP1      | -0,06185438  | -0,184549223 | 0 | N.A. | 0 |
| ZBTB9       | -0,061903945 | -0,076173449 | 0 | N.A. | 0 |
| TCF7        | -0,061945808 | -0,048912726 | 0 | N.A. | 0 |
| CTB-113D17. | -0,061945876 | 0,045421041  | 0 | N.A. | 0 |
| CNIH2       | -0,061968828 | 0,313114854  | 0 | N.A. | 0 |
| HSF2BP      | -0,061983231 | 0,131613059  | 0 | N.A. | 0 |
| MAP10       | -0,062075716 | -0,114830133 | 0 | N.A. | 0 |
| RP11-426L16 | -0,062092352 | -0,047438404 | 0 | N.A. | 0 |
| CDK20       | -0,062139591 | -0,070160256 | 0 | N.A. | 0 |
| TTY14       | -0,062148221 | -0,145599626 | 0 | N.A. | 0 |
| HTR3E       | -0,062168219 |              | 0 | N.A. | 0 |
| TAS2R14     | -0,062195034 | 0,148293643  | 0 | N.A. | 0 |
| YME1L1      | -0,062247999 | 0,345138072  | 0 | N.A. | 0 |
| LINC00665   | -0,062260853 | -0,226667525 | 0 | N.A. | 0 |
| PRKD3       | -0,062266012 | -0,137709341 | 0 | N.A. | 0 |
| APOD        | -0,062269006 | 0,163664621  | 0 | N.A. | 0 |
| RP1-151F17. | -0,062302807 | 0,165509622  | 0 | N.A. | 0 |
| RP3-473L9.4 | -0,062348467 | 0,018698658  | 0 | N.A. | 0 |
| RP11-546K22 | -0,062349081 | -0,226617383 | 0 | N.A. | 0 |
| TRGC2       | -0,06236756  |              | 0 | N.A. | 0 |
| ODF3L2      | -0,062404989 | 0,081823509  | 0 | N.A. | 0 |
| NTNG2       | -0,062430372 |              | 0 | N.A. | 0 |
| URB1-AS1    | -0,062446309 | 0,090135274  | 0 | N.A. | 0 |
| ELMOD3      | -0,062484118 | 0,15679553   | 0 | N.A. | 0 |
| LRR1Q4      | -0,062502039 | -0,026597964 | 0 | N.A. | 0 |
| NEK11       | -0,062561274 | -0,072152816 | 0 | N.A. | 0 |
| RASL11B     | -0,062608699 | -0,055051731 | 0 | N.A. | 0 |
| ZNF100      | -0,062633415 | 0,003334399  | 0 | N.A. | 0 |
| FUBP3       | -0,062651149 | 0,063257735  | 0 | N.A. | 0 |

|             |              |              |   |      |   |
|-------------|--------------|--------------|---|------|---|
| TCF7L1      | -0,062706639 | 0,044870892  | 0 | N.A. | 0 |
| JADE1       | -0,062783756 | -0,187959029 | 0 | N.A. | 0 |
| HOXD3       | -0,062784737 | -0,06384095  | 0 | N.A. | 0 |
| GHRH        | -0,062797495 |              | 0 | N.A. | 0 |
| RP11-221N13 | -0,062812265 | 0,309301802  | 0 | N.A. | 0 |
| RP11-700H6. | -0,062839827 | 0,21559004   | 0 | N.A. | 0 |
| RP11-775C24 | -0,062895496 | 0,131612282  | 0 | N.A. | 0 |
| KB-1562D12. | -0,06300918  | 0,033741599  | 0 | N.A. | 0 |
| RP11-819C21 | -0,06303153  | 0,349393098  | 0 | N.A. | 0 |
| INMT        | -0,063089244 |              | 0 | N.A. | 0 |
| TGIF2       | -0,063107355 | -0,029304782 | 0 | N.A. | 0 |
| MAN1B1-AS1  | -0,063138246 | -0,052598022 | 0 | N.A. | 0 |
| RP11-524C21 | -0,063147862 | 0,031623484  | 0 | N.A. | 0 |
| PIGP        | -0,063154117 | -0,215078422 | 0 | N.A. | 0 |
| FBRSL1      | -0,063175664 | 0,181246649  | 0 | N.A. | 0 |
| RP11-443B7. | -0,06319708  | -0,092997671 | 0 | N.A. | 0 |
| TMEM150C    | -0,063231305 | -0,167955219 | 0 | N.A. | 0 |
| LINC00638   | -0,06324301  |              | 0 | N.A. | 0 |
| ZNF439      | -0,063250907 | -0,248960866 | 0 | N.A. | 0 |
| THADA       | -0,06329443  | 0,005966486  | 0 | N.A. | 0 |
| SUSD4       | -0,06332797  | -0,029105341 | 0 | N.A. | 0 |
| BOLA2       | -0,063339449 | -0,105348791 | 0 | N.A. | 0 |
| RP11-755B10 | -0,063349027 | -0,054624309 | 0 | N.A. | 0 |
| SGSM3       | -0,063427379 | 0,197618728  | 0 | N.A. | 0 |
| SPTSSA      | -0,063432183 | -0,225046205 | 0 | N.A. | 0 |
| RP11-351D16 | -0,06345625  | 0,011093667  | 0 | N.A. | 0 |
| KB-1568E2.1 | -0,063460916 |              | 0 | N.A. | 0 |
| HIST1H2BM   | -0,063470688 | -0,315213904 | 0 | N.A. | 0 |
| XPO4        | -0,06349785  | 0,284196231  | 0 | N.A. | 0 |
| ZC3H7A      | -0,063504331 | 0,111907093  | 0 | N.A. | 0 |
| UGT2B4      | -0,063533803 |              | 0 | N.A. | 0 |
| FOXRED2     | -0,063601164 | -0,13268748  | 0 | N.A. | 0 |
| RP4-816N1.6 | -0,063609355 | -0,163647856 | 0 | N.A. | 0 |

|             |              |              |   |      |   |
|-------------|--------------|--------------|---|------|---|
| CRCP        | -0,06363702  | -0,19031109  | 0 | N.A. | 0 |
| DNAJC14     | -0,063672859 | -0,079804889 | 0 | N.A. | 0 |
| RP11-297K8. | -0,063679073 | -0,168518739 | 0 | N.A. | 0 |
| RP4-569M23  | -0,063701695 |              | 0 | N.A. | 0 |
| MITF        | -0,063766491 | -0,068903286 | 0 | N.A. | 0 |
| PTGDR       | -0,063786069 | -0,250688294 | 0 | N.A. | 0 |
| RP11-307N16 | -0,063804978 | -0,038719654 | 0 | N.A. | 0 |
| ZNF30       | -0,063815594 | -0,201604163 | 0 | N.A. | 0 |
| PDCD4       | -0,063819452 | -0,197474292 | 0 | N.A. | 0 |
| FAM19A3     | -0,063849681 |              | 0 | N.A. | 0 |
| RP11-495P10 | -0,063865809 | -0,073878153 | 0 | N.A. | 0 |
| TCEB3-AS1   | -0,063881754 | -0,131104863 | 0 | N.A. | 0 |
| IGHV3-48    | -0,063899021 |              | 0 | N.A. | 0 |
| UCK1        | -0,063915224 | -0,237985052 | 0 | N.A. | 0 |
| CHRM3       | -0,063951802 | 0,165142083  | 0 | N.A. | 0 |
| MMP17       | -0,063963879 |              | 0 | N.A. | 0 |
| DNAJB1      | -0,063992464 | 0,25459915   | 0 | N.A. | 0 |
| UPRT        | -0,064006172 | -0,076897223 | 0 | N.A. | 0 |
| RP11-798G7. | -0,064094111 | -0,039702897 | 0 | N.A. | 0 |
| RP11-80H5.2 | -0,064134154 | 0,202295038  | 0 | N.A. | 0 |
| DYNC111     | -0,064175347 | -0,273961893 | 0 | N.A. | 0 |
| KIF3A       | -0,064225226 | 0,034839539  | 0 | N.A. | 0 |
| REP15       | -0,064228455 | 0,113494955  | 0 | N.A. | 0 |
| DENND4B     | -0,06422987  | 0,00204405   | 0 | N.A. | 0 |
| RP11-475I24 | -0,064306423 | -0,140071981 | 0 | N.A. | 0 |
| EPHX1       | -0,064310936 | -0,046234633 | 0 | N.A. | 0 |
| CTD-2538C1. | -0,06433764  | 0,051795379  | 0 | N.A. | 0 |
| SPACA3      | -0,064342222 | -0,045454661 | 0 | N.A. | 0 |
| KRBOX1      | -0,064359254 |              | 0 | N.A. | 0 |
| DNAL4       | -0,064415002 | 0,111852446  | 0 | N.A. | 0 |
| NUB1        | -0,064453354 | 0,265621554  | 0 | N.A. | 0 |
| ZNF16       | -0,064549734 | -0,00252391  | 0 | N.A. | 0 |
| PIK3R6      | -0,064565093 | -0,05245725  | 0 | N.A. | 0 |

|              |              |              |   |      |   |
|--------------|--------------|--------------|---|------|---|
| TRPA1        | -0,064600908 |              | 0 | N.A. | 0 |
| RNF25        | -0,064629005 | -0,017741952 | 0 | N.A. | 0 |
| RP11-59C5.3  | -0,064674441 | 0,206061514  | 0 | N.A. | 0 |
| ASB16-AS1    | -0,064744866 | -0,023145923 | 0 | N.A. | 0 |
| S100A12      | -0,064767064 | 0,038428745  | 0 | N.A. | 0 |
| STAC2        | -0,064775002 |              | 0 | N.A. | 0 |
| ADAMTS4      | -0,064822416 | -0,076359246 | 0 | N.A. | 0 |
| ETS2         | -0,064847909 | -0,297194233 | 0 | N.A. | 0 |
| ZNF736       | -0,064857653 | -0,183730286 | 0 | N.A. | 0 |
| CTD-2349P2.1 | -0,064886576 | -0,089691438 | 0 | N.A. | 0 |
| APOC2        | -0,064933764 | -0,262194917 | 0 | N.A. | 0 |
| SCARA3       | -0,064933906 | -0,051033008 | 0 | N.A. | 0 |
| ID2-AS1      | -0,064976336 | -0,056427219 | 0 | N.A. | 0 |
| ART5         | -0,065043317 |              | 0 | N.A. | 0 |
| LINC01451    | -0,065048293 | -0,093583792 | 0 | N.A. | 0 |
| FAR1         | -0,065058573 | 0,102693566  | 0 | N.A. | 0 |
| RIC8B        | -0,06506207  | 0,380066612  | 0 | N.A. | 0 |
| FRRS1L       | -0,065164409 | 0,081667818  | 0 | N.A. | 0 |
| RHOJ         | -0,065167964 | 0,093476156  | 0 | N.A. | 0 |
| PELO         | -0,065189762 | 0,023895827  | 0 | N.A. | 0 |
| RP11-227G1.5 | -0,065243172 |              | 0 | N.A. | 0 |
| LINC00668    | -0,06526147  | 0,035365412  | 0 | N.A. | 0 |
| SCN8A        | -0,065312956 | 0,018425249  | 0 | N.A. | 0 |
| ADORA3       | -0,065341609 | 0,368015909  | 0 | N.A. | 0 |
| RP11-93B14.1 | -0,065365048 |              | 0 | N.A. | 0 |
| EDC4         | -0,065375909 | 0,007842031  | 0 | N.A. | 0 |
| RP11-416N2.1 | -0,065381996 | 0,054631779  | 0 | N.A. | 0 |
| CRYBA2       | -0,065415698 | -0,30629508  | 0 | N.A. | 0 |
| ASB2         | -0,065418018 | -0,080387704 | 0 | N.A. | 0 |
| RP11-57G10.1 | -0,065424323 | 0,000133142  | 0 | N.A. | 0 |
| RP11-78O7.2  | -0,06542991  | 0,284252388  | 0 | N.A. | 0 |
| CTA-292E10.1 | -0,065477598 | 0,117029871  | 0 | N.A. | 0 |
| RP11-63M22.1 | -0,065494137 | -0,075850054 | 0 | N.A. | 0 |

|             |              |              |   |      |   |
|-------------|--------------|--------------|---|------|---|
| RP11-77K12. | -0,065495733 | 0,02330289   | 0 | N.A. | 0 |
| RP5-827C21. | -0,065568177 | 0,122171214  | 0 | N.A. | 0 |
| ALKBH8      | -0,065604518 | -0,00121979  | 0 | N.A. | 0 |
| PREPL       | -0,06565096  | 0,160491084  | 0 | N.A. | 0 |
| LINC00607   | -0,065658338 |              | 0 | N.A. | 0 |
| SMO         | -0,065698181 | -0,141801331 | 0 | N.A. | 0 |
| FAM178A     | -0,065718299 | -0,008377577 | 0 | N.A. | 0 |
| ADAMTS12    | -0,065722044 | 0,108982463  | 0 | N.A. | 0 |
| GLT8D2      | -0,065724685 | -0,013834002 | 0 | N.A. | 0 |
| LINC00861   | -0,065791838 | -0,093103196 | 0 | N.A. | 0 |
| RP11-468E2. | -0,065811223 | 0,027712185  | 0 | N.A. | 0 |
| LY6G5C      | -0,065812268 | -0,152407729 | 0 | N.A. | 0 |
| DOLPP1      | -0,065882341 | 0,076322394  | 0 | N.A. | 0 |
| B4GALT2     | -0,06592689  | 0,039238345  | 0 | N.A. | 0 |
| GPR113      | -0,065969757 | 0,015493462  | 0 | N.A. | 0 |
| CCDC171     | -0,066030266 | 0,010628606  | 0 | N.A. | 0 |
| RP11-442H2. | -0,066059915 | 0,201675755  | 0 | N.A. | 0 |
| MAP2K6      | -0,066077392 | -0,151998674 | 0 | N.A. | 0 |
| POMGNT1     | -0,066094556 | -0,12864716  | 0 | N.A. | 0 |
| TSHZ3       | -0,066156863 | 0,017673947  | 0 | N.A. | 0 |
| MT2A        | -0,066201053 | -0,20710425  | 0 | N.A. | 0 |
| MZF1-AS1    | -0,066211011 | -0,062189984 | 0 | N.A. | 0 |
| MORC2       | -0,066248474 | 0,124487877  | 0 | N.A. | 0 |
| HUS1        | -0,066281582 | -0,048616734 | 0 | N.A. | 0 |
| MIS12       | -0,066298342 | -0,109475749 | 0 | N.A. | 0 |
| ZIC2        | -0,06632227  | 0,231206515  | 0 | N.A. | 0 |
| AC012487.2  | -0,06635955  | -0,06566422  | 0 | N.A. | 0 |
| TMEM105     | -0,066366508 | 0,133613129  | 0 | N.A. | 0 |
| KB-1471A8.1 | -0,066369142 |              | 0 | N.A. | 0 |
| RP1-80N2.2  | -0,066460683 | 0,210576184  | 0 | N.A. | 0 |
| HBE1        | -0,066499295 | -0,002060108 | 0 | N.A. | 0 |
| AC009961.3  | -0,066556939 | 0,043232849  | 0 | N.A. | 0 |
| EIF4G2      | -0,066650678 | 0,235169887  | 0 | N.A. | 0 |



|             |              |              |   |      |   |
|-------------|--------------|--------------|---|------|---|
| SRGAP2      | -0,066664579 | -0,142417773 | 0 | N.A. | 0 |
| KIF27       | -0,066725479 | -0,187257413 | 0 | N.A. | 0 |
| EML4        | -0,066742557 | -0,039860277 | 0 | N.A. | 0 |
| RP11-390P2. | -0,066782375 | -0,144633678 | 0 | N.A. | 0 |
| TIGD4       | -0,066800512 | -0,243751944 | 0 | N.A. | 0 |
| CABLES2     | -0,06684259  | 0,031045339  | 0 | N.A. | 0 |
| CNOT1       | -0,06687526  | 0,05329049   | 0 | N.A. | 0 |
| RP11-434D9. | -0,06691319  | -0,071166322 | 0 | N.A. | 0 |
| MT1E        | -0,066938956 | -0,250480088 | 0 | N.A. | 0 |
| LRRIQ1      | -0,066950432 | -0,125188191 | 0 | N.A. | 0 |
| SDCBP2-AS1  | -0,066977174 | -0,26495607  | 0 | N.A. | 0 |
| PCDHGC3     | -0,067026462 | -0,09015563  | 0 | N.A. | 0 |
| POMZP3      | -0,067033185 | 0,029298048  | 0 | N.A. | 0 |
| INTS6-AS1   | -0,067046104 | 0,07866582   | 0 | N.A. | 0 |
| NRL         | -0,067053319 | -0,237903765 | 0 | N.A. | 0 |
| DGKD        | -0,067055688 | 0,011466644  | 0 | N.A. | 0 |
| CTC-336P14. | -0,067055743 | 0,083295607  | 0 | N.A. | 0 |
| LINC00909   | -0,067064868 | -0,030115209 | 0 | N.A. | 0 |
| AC084809.2  | -0,067081043 | -0,023164402 | 0 | N.A. | 0 |
| NEUROD2     | -0,067119456 |              | 0 | N.A. | 0 |
| RP5-1136G13 | -0,067124587 | 0,245645608  | 0 | N.A. | 0 |
| TNFSF11     | -0,067176022 | 0,189727643  | 0 | N.A. | 0 |
| RP11-121C2. | -0,067231663 | 0,083339666  | 0 | N.A. | 0 |
| C4A         | -0,067304322 |              | 0 | N.A. | 0 |
| LINC00242   | -0,067319803 |              | 0 | N.A. | 0 |
| TMEM121     | -0,067324411 |              | 0 | N.A. | 0 |
| PTGES2-AS1  | -0,067339539 | -0,012191854 | 0 | N.A. | 0 |
| TRAF3IP3    | -0,06735487  | -0,336667694 | 0 | N.A. | 0 |
| PROS1       | -0,06736558  | 0,175843829  | 0 | N.A. | 0 |
| TM2D3       | -0,067399146 | 0,11851765   | 0 | N.A. | 0 |
| DYSF        | -0,067471977 | -0,125701726 | 0 | N.A. | 0 |
| TATDN2      | -0,067473838 | 0,072080248  | 0 | N.A. | 0 |
| ZNF696      | -0,06751757  | 0,306986384  | 0 | N.A. | 0 |

|              |              |              |   |      |   |
|--------------|--------------|--------------|---|------|---|
| GATA3        | -0,067535263 | -0,078787933 | 0 | N.A. | 0 |
| CD244        | -0,06754995  |              | 0 | N.A. | 0 |
| LINC01214    | -0,067559488 | -0,189163077 | 0 | N.A. | 0 |
| FLJ27354     | -0,067580231 | -0,010996257 | 0 | N.A. | 0 |
| RAB34        | -0,067582651 | -0,103074586 | 0 | N.A. | 0 |
| ARX          | -0,067589623 | -0,208800747 | 0 | N.A. | 0 |
| CRYZL1       | -0,067592699 | 0,194972905  | 0 | N.A. | 0 |
| OTOA         | -0,067639048 | -0,096333518 | 0 | N.A. | 0 |
| ZNF337       | -0,06765066  | 0,264442678  | 0 | N.A. | 0 |
| HPS4         | -0,067665399 | 0,359712824  | 0 | N.A. | 0 |
| RP11-243A14  | -0,067690186 | -0,042731732 | 0 | N.A. | 0 |
| ELMOD2       | -0,067734416 | 0,401380551  | 0 | N.A. | 0 |
| SCUBE3       | -0,067786549 | -0,196508902 | 0 | N.A. | 0 |
| C4orf36      | -0,067810939 | 0,014621754  | 0 | N.A. | 0 |
| TMEM178B     | -0,067873995 | -0,047913844 | 0 | N.A. | 0 |
| SYNGR2       | -0,067940338 | 0,616256387  | 0 | N.A. | 0 |
| LINC01411    | -0,067945341 | -0,024390664 | 0 | N.A. | 0 |
| RP11-323J4.1 | -0,067950105 |              | 0 | N.A. | 0 |
| OVCH2        | -0,067960637 |              | 0 | N.A. | 0 |
| ZNF544       | -0,067970187 | -0,017253745 | 0 | N.A. | 0 |
| CTD-2619J13  | -0,067991442 |              | 0 | N.A. | 0 |
| ZNF300       | -0,068002118 | -0,028148727 | 0 | N.A. | 0 |
| RP11-47A8.5  | -0,068011175 | -0,025559173 | 0 | N.A. | 0 |
| LINC00910    | -0,068014653 | 0,010148851  | 0 | N.A. | 0 |
| AGBL3        | -0,068050748 | -0,086510107 | 0 | N.A. | 0 |
| FCGR2B       | -0,068085056 | 0,041265871  | 0 | N.A. | 0 |
| AQP5         | -0,068105523 | 0,074387905  | 0 | N.A. | 0 |
| RP6-65G23.5  | -0,068111276 | 0,245015841  | 0 | N.A. | 0 |
| RP11-598F7.  | -0,06811745  |              | 0 | N.A. | 0 |
| DEFA5        | -0,068142524 | 0,146135279  | 0 | N.A. | 0 |
| SCG5         | -0,068167823 | -0,009851096 | 0 | N.A. | 0 |
| RP11-387M2   | -0,068168086 |              | 0 | N.A. | 0 |
| ZNF397       | -0,068199265 | 0,147247852  | 0 | N.A. | 0 |

|             |              |              |   |      |   |
|-------------|--------------|--------------|---|------|---|
| PPM1F       | -0,06821213  | -0,167710144 | 0 | N.A. | 0 |
| USP28       | -0,068228203 | -0,204893914 | 0 | N.A. | 0 |
| ADAMTS17    | -0,068259954 | -0,269061212 | 0 | N.A. | 0 |
| RP11-1157N  | -0,068276735 |              | 0 | N.A. | 0 |
| RP11-13K12. | -0,06831028  | 0,19710109   | 0 | N.A. | 0 |
| TBK1        | -0,068350081 | 0,216864255  | 0 | N.A. | 0 |
| PLA2G4A     | -0,068385345 | 0,156718927  | 0 | N.A. | 0 |
| RP11-60L3.6 | -0,06840006  |              | 0 | N.A. | 0 |
| SETDB1      | -0,068420672 | 0,039187685  | 0 | N.A. | 0 |
| HSD3B7      | -0,068439101 | 0,171629509  | 0 | N.A. | 0 |
| GPR84       | -0,068444181 | 0,315932116  | 0 | N.A. | 0 |
| IGLV8-61    | -0,068446503 |              | 0 | N.A. | 0 |
| CRELD2      | -0,068451722 | 0,245129349  | 0 | N.A. | 0 |
| B9D2        | -0,068472191 | -0,175211372 | 0 | N.A. | 0 |
| RP1-60O19.1 | -0,068483784 | 0,00561079   | 0 | N.A. | 0 |
| RP11-404O1  | -0,068507328 |              | 0 | N.A. | 0 |
| C2orf44     | -0,068525415 | -0,09498567  | 0 | N.A. | 0 |
| FAM109B     | -0,06853026  | -0,248117467 | 0 | N.A. | 0 |
| RP11-166P13 | -0,068546249 | 0,074165534  | 0 | N.A. | 0 |
| LINC00574   | -0,068595833 | 0,007088511  | 0 | N.A. | 0 |
| CDIPT-AS1   | -0,06860906  | -0,200048854 | 0 | N.A. | 0 |
| PRELP       | -0,068684202 | 0,016833699  | 0 | N.A. | 0 |
| AF015262.2  | -0,068714102 |              | 0 | N.A. | 0 |
| RHBDL3      | -0,068721352 |              | 0 | N.A. | 0 |
| LA16c-325D7 | -0,068731002 | -0,005388244 | 0 | N.A. | 0 |
| MARVELD1    | -0,068737857 | -0,174905016 | 0 | N.A. | 0 |
| CYB5R2      | -0,068739787 | -0,051684531 | 0 | N.A. | 0 |
| SMC2-AS1    | -0,068758949 | -0,092637339 | 0 | N.A. | 0 |
| SLC19A3     | -0,068760756 | -0,012946206 | 0 | N.A. | 0 |
| IGLV3-19    | -0,068789035 |              | 0 | N.A. | 0 |
| STX17       | -0,068916955 | 0,157502001  | 0 | N.A. | 0 |
| GOLGA8R     | -0,068924033 |              | 0 | N.A. | 0 |
| ZAP70       | -0,068936254 | -0,189240177 | 0 | N.A. | 0 |

|             |              |              |   |      |   |
|-------------|--------------|--------------|---|------|---|
| LINC01094   | -0,068990318 | -0,189300122 | 0 | N.A. | 0 |
| RP11-739B23 | -0,069009853 | -0,091787878 | 0 | N.A. | 0 |
| GPR18       | -0,069018745 | -0,330161772 | 0 | N.A. | 0 |
| RASGRF1     | -0,069042583 |              | 0 | N.A. | 0 |
| SLC39A4     | -0,069082743 | 0,525253436  | 0 | N.A. | 0 |
| RNF139-AS1  | -0,06908994  | -0,204560304 | 0 | N.A. | 0 |
| NPC1L1      | -0,069100636 | 0,190006753  | 0 | N.A. | 0 |
| ZNF142      | -0,069102454 | -0,024244431 | 0 | N.A. | 0 |
| TRAPPC5     | -0,069163821 | -0,106242928 | 0 | N.A. | 0 |
| RP11-77H9.8 | -0,069175416 | -0,02437652  | 0 | N.A. | 0 |
| RAD52       | -0,06918514  | -0,002269954 | 0 | N.A. | 0 |
| PAGR1       | -0,069276641 | -0,053220347 | 0 | N.A. | 0 |
| KB-1980E6.3 | -0,069278973 |              | 0 | N.A. | 0 |
| ROR1        | -0,069353856 | -0,023334666 | 0 | N.A. | 0 |
| GPR37       | -0,069384322 | -0,116827459 | 0 | N.A. | 0 |
| STRA6       | -0,06938845  | 0,192893036  | 0 | N.A. | 0 |
| STK4-AS1    | -0,069389124 | 0,128747696  | 0 | N.A. | 0 |
| ERC2        | -0,069413452 |              | 0 | N.A. | 0 |
| LIMD2       | -0,069426673 | -0,371316076 | 0 | N.A. | 0 |
| FAM66B      | -0,069454924 | -0,197971532 | 0 | N.A. | 0 |
| GPR55       | -0,069485381 | 0,09044238   | 0 | N.A. | 0 |
| CRTAM       | -0,0695108   |              | 0 | N.A. | 0 |
| RP11-128A17 | -0,069527936 | -0,056337412 | 0 | N.A. | 0 |
| IL11RA      | -0,069550264 | 0,22452391   | 0 | N.A. | 0 |
| ZKSCAN3     | -0,069581128 | 0,099223502  | 0 | N.A. | 0 |
| RP11-398K22 | -0,069596112 | -0,091198677 | 0 | N.A. | 0 |
| PCDH11X     | -0,069606012 | -0,105842508 | 0 | N.A. | 0 |
| HIST1H2BJ   | -0,069625672 | -0,169129074 | 0 | N.A. | 0 |
| ZFH2        | -0,069637907 | 0,176948001  | 0 | N.A. | 0 |
| TGFBRAP1    | -0,069644562 | -0,24672245  | 0 | N.A. | 0 |
| NDE1        | -0,069666314 | 0,145265599  | 0 | N.A. | 0 |
| HIPK2       | -0,069686055 | 0,329837181  | 0 | N.A. | 0 |
| KCNMA1      | -0,069697132 | 0,105332385  | 0 | N.A. | 0 |

|             |              |              |   |      |   |
|-------------|--------------|--------------|---|------|---|
| ARHGEF26    | -0,069738043 | -0,009475041 | 0 | N.A. | 0 |
| SCAMP5      | -0,069757686 | 0,275868975  | 0 | N.A. | 0 |
| RP11-367N14 | -0,069769998 | -0,069217584 | 0 | N.A. | 0 |
| PPP2R1B     | -0,069778808 | 0,096479324  | 0 | N.A. | 0 |
| SLC4A7      | -0,069826928 | -0,133635059 | 0 | N.A. | 0 |
| ASAH2B      | -0,06988405  | -0,048908976 | 0 | N.A. | 0 |
| RP11-1100L3 | -0,069893561 |              | 0 | N.A. | 0 |
| SFMBT1      | -0,069928381 | 0,160714568  | 0 | N.A. | 0 |
| MDP1        | -0,069952253 | -0,017805128 | 0 | N.A. | 0 |
| DDAH1       | -0,069986115 | -0,029917516 | 0 | N.A. | 0 |
| C15orf40    | -0,0700072   | -0,095446286 | 0 | N.A. | 0 |
| CTD-2008P7. | -0,070024227 | -0,005579261 | 0 | N.A. | 0 |
| MEPCE       | -0,070031593 | -0,005269333 | 0 | N.A. | 0 |
| ABCB10      | -0,070112877 | 0,179645934  | 0 | N.A. | 0 |
| UCHL1       | -0,070197604 | -0,203818603 | 0 | N.A. | 0 |
| MMD         | -0,070226882 | 0,299792755  | 0 | N.A. | 0 |
| RP11-266K4. | -0,070234414 | 0,018914752  | 0 | N.A. | 0 |
| RP5-963E22. | -0,070263858 | 0,126471359  | 0 | N.A. | 0 |
| GPR19       | -0,070276474 |              | 0 | N.A. | 0 |
| AFF2        | -0,070308135 | 0,053384142  | 0 | N.A. | 0 |
| SETD2       | -0,070314622 | -0,029978377 | 0 | N.A. | 0 |
| ZNF257      | -0,070335622 | -0,148798317 | 0 | N.A. | 0 |
| CCDC61      | -0,070339894 | 0,036323854  | 0 | N.A. | 0 |
| FAM32A      | -0,070363745 | -0,069539463 | 0 | N.A. | 0 |
| RP4-794I6.4 | -0,070389434 | 0,092470827  | 0 | N.A. | 0 |
| RP11-157F20 | -0,07039389  | 0,077041406  | 0 | N.A. | 0 |
| CTD-2012J19 | -0,070414874 | 0,086548768  | 0 | N.A. | 0 |
| TMED4       | -0,070439353 | 0,352816923  | 0 | N.A. | 0 |
| FRZB        | -0,070440386 | -0,116588146 | 0 | N.A. | 0 |
| KIF19       | -0,07046124  | -0,107667982 | 0 | N.A. | 0 |
| RP3-461P17. | -0,070547418 | 0,054542662  | 0 | N.A. | 0 |
| PPP2R5E     | -0,070608097 | -0,053220388 | 0 | N.A. | 0 |
| DCAF17      | -0,070636613 | -0,21232739  | 0 | N.A. | 0 |

|             |              |              |   |      |   |
|-------------|--------------|--------------|---|------|---|
| MIOS        | -0,070662196 | -0,16404035  | 0 | N.A. | 0 |
| CXXC4       | -0,070708603 | -0,105668567 | 0 | N.A. | 0 |
| MNDA        | -0,070733033 | -0,175417695 | 0 | N.A. | 0 |
| NUDT12      | -0,070743584 | 0,028097851  | 0 | N.A. | 0 |
| PYROXD2     | -0,070763794 | 0,129644021  | 0 | N.A. | 0 |
| MYO15A      | -0,070810014 | 0,175472236  | 0 | N.A. | 0 |
| SETBP1      | -0,070817533 | -0,136274535 | 0 | N.A. | 0 |
| RP11-35O15. | -0,070818465 | -0,104922996 | 0 | N.A. | 0 |
| GMPPB       | -0,070841223 | -0,010192159 | 0 | N.A. | 0 |
| LMNTD1      | -0,07087248  | -0,191295133 | 0 | N.A. | 0 |
| RP11-795F19 | -0,070872569 |              | 0 | N.A. | 0 |
| CLUL1       | -0,070885074 |              | 0 | N.A. | 0 |
| RP5-1125A11 | -0,070941709 |              | 0 | N.A. | 0 |
| RP11-190A12 | -0,070961508 | 0,106418957  | 0 | N.A. | 0 |
| RP11-354K1. | -0,070993315 | -0,098315121 | 0 | N.A. | 0 |
| RP11-490B18 | -0,071008178 | -0,069730469 | 0 | N.A. | 0 |
| KRBA2       | -0,071012554 | 0,10738948   | 0 | N.A. | 0 |
| RP11-697M1  | -0,071014388 | -0,102040132 | 0 | N.A. | 0 |
| RP3-428L16. | -0,071018698 | -0,087374832 | 0 | N.A. | 0 |
| SYNC        | -0,071034732 | -0,337063402 | 0 | N.A. | 0 |
| KIAA1755    | -0,07108057  |              | 0 | N.A. | 0 |
| SLC16A7     | -0,071087779 | -0,000838944 | 0 | N.A. | 0 |
| LINC00618   | -0,071116086 | -0,023347373 | 0 | N.A. | 0 |
| PABPC3      | -0,071123067 | -0,131292143 | 0 | N.A. | 0 |
| COL15A1     | -0,071158435 | -0,044492777 | 0 | N.A. | 0 |
| ITGAX       | -0,07117415  | -0,001229569 | 0 | N.A. | 0 |
| RP11-1055B8 | -0,071177217 | -0,049348157 | 0 | N.A. | 0 |
| MYT1        | -0,071187286 | 0,07279475   | 0 | N.A. | 0 |
| GFAP        | -0,071220594 |              | 0 | N.A. | 0 |
| RP3-388E23. | -0,071246528 | -0,047551926 | 0 | N.A. | 0 |
| METTL6      | -0,071271609 | -0,280648225 | 0 | N.A. | 0 |
| HPX         | -0,071284866 | 0,124421366  | 0 | N.A. | 0 |
| YLPM1       | -0,071298075 | 0,043508257  | 0 | N.A. | 0 |

|              |              |              |   |      |   |
|--------------|--------------|--------------|---|------|---|
| GLB1         | -0,071329173 | 0,146092885  | 0 | N.A. | 0 |
| DRD2         | -0,071356893 | -0,088094985 | 0 | N.A. | 0 |
| SH2B2        | -0,071414112 | -0,163455706 | 0 | N.A. | 0 |
| RP11-66B24.  | -0,071425272 | -0,083194829 | 0 | N.A. | 0 |
| PHTF1        | -0,071431248 | -0,038176059 | 0 | N.A. | 0 |
| PAPSS2       | -0,071448995 | 0,003223309  | 0 | N.A. | 0 |
| RP11-546J1.1 | -0,071549869 | -0,026258741 | 0 | N.A. | 0 |
| RP3-461F17.  | -0,071585903 | 0,201033621  | 0 | N.A. | 0 |
| KCTD18       | -0,071602598 | 0,21879132   | 0 | N.A. | 0 |
| DPT          | -0,071650787 | -0,217688248 | 0 | N.A. | 0 |
| EMR1         | -0,071675986 |              | 0 | N.A. | 0 |
| ANGEL2       | -0,071741492 | 0,113988554  | 0 | N.A. | 0 |
| APLF         | -0,071764699 | 0,068946334  | 0 | N.A. | 0 |
| CELF3        | -0,071844532 | 0,11029525   | 0 | N.A. | 0 |
| IGHV3-49     | -0,071847654 |              | 0 | N.A. | 0 |
| CLN3         | -0,071882561 | 0,057009478  | 0 | N.A. | 0 |
| AP000866.1   | -0,071953523 | 0,146033991  | 0 | N.A. | 0 |
| RP11-220C2.  | -0,071987699 | 0,042422839  | 0 | N.A. | 0 |
| AC005537.2   | -0,0720002   | 0,007564695  | 0 | N.A. | 0 |
| SARNP        | -0,072006021 | 0,013222454  | 0 | N.A. | 0 |
| PINLYP       | -0,072053038 | 0,021709898  | 0 | N.A. | 0 |
| SF3A1        | -0,072075995 | 0,127804604  | 0 | N.A. | 0 |
| RP11-159D12  | -0,072079043 | -0,094996421 | 0 | N.A. | 0 |
| RP11-48B3.5  | -0,07212934  | 0,053915578  | 0 | N.A. | 0 |
| GRIN1        | -0,072141972 | -0,018943097 | 0 | N.A. | 0 |
| RP11-5A19.5  | -0,072145602 | -0,085413198 | 0 | N.A. | 0 |
| MOCOS        | -0,072156998 | -0,104400035 | 0 | N.A. | 0 |
| CTD-2090I13  | -0,07219448  | -0,178879452 | 0 | N.A. | 0 |
| KDR          | -0,072309677 | 0,038607337  | 0 | N.A. | 0 |
| ADM5         | -0,07232182  | 0,034566296  | 0 | N.A. | 0 |
| DDO          | -0,072344562 | -0,116547894 | 0 | N.A. | 0 |
| U91319.1     | -0,072353432 |              | 0 | N.A. | 0 |
| CKMT2-AS1    | -0,072375671 | 0,140018676  | 0 | N.A. | 0 |

|              |              |              |   |      |   |
|--------------|--------------|--------------|---|------|---|
| SIX3-AS1     | -0,072445284 | -0,014266278 | 0 | N.A. | 0 |
| RP11-111M2   | -0,072445336 | -0,172693223 | 0 | N.A. | 0 |
| TRAC         | -0,072471286 | -0,328787373 | 0 | N.A. | 0 |
| TMEM63A      | -0,07247272  | 0,228336065  | 0 | N.A. | 0 |
| SP2-AS1      | -0,072482109 | 0,199784109  | 0 | N.A. | 0 |
| EIF5A2       | -0,07250959  | 0,075463432  | 0 | N.A. | 0 |
| TPH1         | -0,072537995 | 0,315065298  | 0 | N.A. | 0 |
| DHFRL1       | -0,072557519 | 0,069032335  | 0 | N.A. | 0 |
| RP11-402D2   | -0,072577986 | 0,075663292  | 0 | N.A. | 0 |
| ZNF385A      | -0,07259363  | 0,08345945   | 0 | N.A. | 0 |
| PCYT1B       | -0,072612645 |              | 0 | N.A. | 0 |
| C6orf163     | -0,072649401 | 0,009955539  | 0 | N.A. | 0 |
| HMG3-AS1     | -0,072756297 | 0,14847044   | 0 | N.A. | 0 |
| CCDC121      | -0,072790773 | -0,170730757 | 0 | N.A. | 0 |
| SLC9B2       | -0,072840537 | -0,089057694 | 0 | N.A. | 0 |
| PPT2-EGFL8   | -0,072870135 | 0,29362402   | 0 | N.A. | 0 |
| CCDC102B     | -0,072879817 | -0,364500236 | 0 | N.A. | 0 |
| UNK          | -0,072942375 | -0,07540146  | 0 | N.A. | 0 |
| MAGI2        | -0,072944584 | -0,032420592 | 1 | none | 0 |
| RP3-329E20   | -0,072977798 | -0,037127264 | 0 | N.A. | 0 |
| IGBP1        | -0,072990039 | -0,106721116 | 0 | N.A. | 0 |
| TCTEX1D1     | -0,073004904 |              | 0 | N.A. | 0 |
| ZNF146       | -0,073062715 | -0,253797888 | 0 | N.A. | 0 |
| MYT1L        | -0,073098466 | 0,088950574  | 0 | N.A. | 0 |
| RP11-770J1.4 | -0,07319783  | 0,042216629  | 0 | N.A. | 0 |
| PTX3         | -0,073244664 |              | 0 | N.A. | 0 |
| HELQ         | -0,073289506 | -0,122602503 | 0 | N.A. | 0 |
| RP11-739L10  | -0,073291367 | 0,256092663  | 0 | N.A. | 0 |
| B3GNT4       | -0,073296671 | 0,103354797  | 0 | N.A. | 0 |
| PIP4K2B      | -0,073308962 | -0,053819736 | 0 | N.A. | 0 |
| RP11-386G1   | -0,073337666 | -0,453467558 | 0 | N.A. | 0 |
| SERHL2       | -0,073390439 | 0,084378465  | 0 | N.A. | 0 |
| PCDHGB4      | -0,073394849 |              | 0 | N.A. | 0 |



|             |              |              |   |      |   |
|-------------|--------------|--------------|---|------|---|
| URAD        | -0,073412673 | -0,20142858  | 0 | N.A. | 0 |
| ZCCHC18     | -0,073450056 |              | 0 | N.A. | 0 |
| RP11-10070  | -0,073467895 | 0,112810864  | 0 | N.A. | 0 |
| CCDC3       | -0,07348062  | 0,014286807  | 0 | N.A. | 0 |
| RP11-474P2. | -0,073505545 |              | 0 | N.A. | 0 |
| BCL7B       | -0,073516972 | 0,014285088  | 0 | N.A. | 0 |
| RP11-617F23 | -0,07353893  | 0,107015588  | 0 | N.A. | 0 |
| MTFR1L      | -0,073568527 | -0,239713486 | 0 | N.A. | 0 |
| ANXA4       | -0,073582682 | 0,318504789  | 0 | N.A. | 0 |
| RP11-548H3. | -0,07358618  | -0,158297991 | 0 | N.A. | 0 |
| SRPK3       | -0,073594092 | -0,31874739  | 0 | N.A. | 0 |
| SHISA9      | -0,073597173 |              | 0 | N.A. | 0 |
| TAS1R3      | -0,07361148  | -0,277628999 | 0 | N.A. | 0 |
| SIGIRR      | -0,073628847 | 0,403903815  | 0 | N.A. | 0 |
| CSRNP3      | -0,073678605 | -0,199527178 | 0 | N.A. | 0 |
| DCTN6       | -0,073738266 | 0,17217697   | 0 | N.A. | 0 |
| AC009299.3  | -0,073785241 | -0,255510009 | 0 | N.A. | 0 |
| GIT1        | -0,073809256 | -0,022718097 | 0 | N.A. | 0 |
| INTU        | -0,073900569 | -0,062585368 | 0 | N.A. | 0 |
| RBM26-AS1   | -0,073932684 | -0,195609325 | 0 | N.A. | 0 |
| CYP20A1     | -0,073978385 | -0,128157079 | 0 | N.A. | 0 |
| LDLRAD4     | -0,074011207 | 0,007365814  | 0 | N.A. | 0 |
| FJX1        | -0,074024967 | -0,095048112 | 0 | N.A. | 0 |
| ZNF180      | -0,074105439 | -0,191815744 | 0 | N.A. | 0 |
| C8orf86     | -0,074157997 |              | 0 | N.A. | 0 |
| FITM1       | -0,07416179  | 0,195904803  | 0 | N.A. | 0 |
| ME3         | -0,074162786 | -0,089602244 | 0 | N.A. | 0 |
| MYH7B       | -0,074166317 | -0,111250404 | 0 | N.A. | 0 |
| ALOX15      | -0,07419706  | 0,244426477  | 0 | N.A. | 0 |
| C10orf99    | -0,074211728 | -0,155140015 | 0 | N.A. | 0 |
| UBXN7       | -0,074245645 | 0,094948623  | 0 | N.A. | 0 |
| HOXB13      | -0,074246277 | -0,21103639  | 0 | N.A. | 0 |
| RP11-620J15 | -0,074292853 |              | 0 | N.A. | 0 |

|              |              |              |   |      |   |
|--------------|--------------|--------------|---|------|---|
| CTC-492K19.  | -0,074318104 |              | 0 | N.A. | 0 |
| RP5-943J3.2  | -0,074342771 | -0,133593448 | 0 | N.A. | 0 |
| LINC01346    | -0,074356697 |              | 0 | N.A. | 0 |
| TIA1         | -0,0744035   | 0,153013595  | 0 | N.A. | 0 |
| TVP23A       | -0,07440672  |              | 0 | N.A. | 0 |
| LRP6         | -0,074414071 | 0,015721081  | 0 | N.A. | 0 |
| CHST14       | -0,074417637 | 0,163237707  | 0 | N.A. | 0 |
| RP11-301O19  | -0,074419614 | 0,141939188  | 0 | N.A. | 0 |
| TIGD5        | -0,07443913  | -0,136505443 | 0 | N.A. | 0 |
| PALB2        | -0,074473754 | 0,140399514  | 0 | N.A. | 0 |
| FLYWCH2      | -0,074529139 | 0,099423615  | 0 | N.A. | 0 |
| SLN          | -0,07453057  |              | 0 | N.A. | 0 |
| PIM2         | -0,074537729 | -0,059169223 | 0 | N.A. | 0 |
| SDR42E1      | -0,07457167  | -0,22030575  | 0 | N.A. | 0 |
| WDR19        | -0,074592395 | -0,169606126 | 0 | N.A. | 0 |
| STX1B        | -0,074594659 | 0,278529367  | 0 | N.A. | 0 |
| AL928768.3   | -0,074602864 | -0,262194917 | 0 | N.A. | 0 |
| OTULIN       | -0,074698001 | -0,023649826 | 0 | N.A. | 0 |
| RP4-549L20.3 | -0,074725231 | -0,175037586 | 0 | N.A. | 0 |
| RP11-867G23  | -0,074740115 | -0,116539298 | 0 | N.A. | 0 |
| RBPJ         | -0,074744822 | 0,048886415  | 0 | N.A. | 0 |
| RP11-629O1.  | -0,074781652 | 0,05172196   | 0 | N.A. | 0 |
| ATP8B4       | -0,074824945 | 0,165513294  | 0 | N.A. | 0 |
| RCBTB1       | -0,07483886  | 0,038331241  | 0 | N.A. | 0 |
| SMIM19       | -0,074840207 | 0,000425303  | 0 | N.A. | 0 |
| TAF1A-AS1    | -0,074842579 | -0,194105209 | 0 | N.A. | 0 |
| TAF1C        | -0,074872383 | 0,144753343  | 0 | N.A. | 0 |
| SPN          | -0,074879016 | -0,331355535 | 0 | N.A. | 0 |
| RP11-480I12  | -0,074895893 | 0,094004252  | 0 | N.A. | 0 |
| MLLT6        | -0,074907384 | 0,299683268  | 0 | N.A. | 0 |
| AP3B1        | -0,074907784 | 0,145703347  | 0 | N.A. | 0 |
| PLAGL1       | -0,074950484 | -0,32242933  | 0 | N.A. | 0 |
| CTD-2078B5.  | -0,074980383 | 0,042972404  | 0 | N.A. | 0 |

|             |              |              |   |      |   |
|-------------|--------------|--------------|---|------|---|
| RFPL4B      | -0,075002368 |              | 0 | N.A. | 0 |
| MYPOP       | -0,075028853 | -0,206328013 | 0 | N.A. | 0 |
| CTD-2501B8. | -0,075175449 |              | 0 | N.A. | 0 |
| RP11-599B13 | -0,075180649 | 0,002540124  | 0 | N.A. | 0 |
| METTL7A     | -0,075182789 | -0,136991666 | 0 | N.A. | 0 |
| RP3-380B8.4 | -0,07518625  | -0,022818435 | 0 | N.A. | 0 |
| HMGCS2      | -0,075196695 | -0,149373348 | 0 | N.A. | 0 |
| TSPYL4      | -0,075205546 | 0,128701957  | 0 | N.A. | 0 |
| LRRC7       | -0,07528409  | -0,062447338 | 0 | N.A. | 0 |
| ZNF442      | -0,075304602 | 0,032226038  | 0 | N.A. | 0 |
| WNK4        | -0,075312589 | -0,226511634 | 0 | N.A. | 0 |
| ISG20L2     | -0,075335828 | -0,079976737 | 0 | N.A. | 0 |
| TMEM44-AS1  | -0,075350669 | -0,100842906 | 0 | N.A. | 0 |
| TCFL5       | -0,07535216  | 0,12130093   | 0 | N.A. | 0 |
| FAM131B     | -0,075362085 | 0,090525168  | 0 | N.A. | 0 |
| RP11-39201  | -0,075402072 | -0,012266413 | 0 | N.A. | 0 |
| ZNF260      | -0,075404756 | -0,109299034 | 0 | N.A. | 0 |
| CCL24       | -0,075405267 | -0,203873742 | 0 | N.A. | 0 |
| LINC00843   | -0,075422855 |              | 0 | N.A. | 0 |
| PXK         | -0,075437088 | -0,135856038 | 0 | N.A. | 0 |
| APOM        | -0,075449637 | -0,343589502 | 0 | N.A. | 0 |
| OPRD1       | -0,075497635 | -0,120459399 | 0 | N.A. | 0 |
| CTD-2186M1  | -0,07552265  | -0,19010029  | 0 | N.A. | 0 |
| AC144831.1  | -0,075523412 | 0,072350564  | 0 | N.A. | 0 |
| AL358852.1  | -0,075569493 | -0,225416747 | 0 | N.A. | 0 |
| AGMO        | -0,075615033 | 0,142078007  | 0 | N.A. | 0 |
| NSMAF       | -0,075620373 | 0,143466811  | 0 | N.A. | 0 |
| PCNT        | -0,075636237 | -0,171463268 | 0 | N.A. | 0 |
| C16orf54    | -0,075636792 | -0,158570881 | 0 | N.A. | 0 |
| SOAT1       | -0,075673231 | -0,026886619 | 0 | N.A. | 0 |
| CTA-126B4.7 | -0,075702733 | 0,205365573  | 0 | N.A. | 0 |
| SP140       | -0,075743047 | -0,19366105  | 0 | N.A. | 0 |
| DCAF6       | -0,075766014 | -0,062187221 | 0 | N.A. | 0 |

|             |              |              |   |      |   |
|-------------|--------------|--------------|---|------|---|
| HSF1        | -0,075776812 | 0,060019936  | 0 | N.A. | 0 |
| ZNF587B     | -0,075814895 | -0,101296354 | 0 | N.A. | 0 |
| RP11-276H19 | -0,075816594 | -0,113290383 | 0 | N.A. | 0 |
| SIMC1       | -0,0758271   | -0,320975416 | 0 | N.A. | 0 |
| ZSCAN31     | -0,075858625 | -0,340230776 | 0 | N.A. | 0 |
| SLC30A6     | -0,075891788 | 0,130273293  | 0 | N.A. | 0 |
| RP11-771K4. | -0,075938    | 0,097577297  | 0 | N.A. | 0 |
| AL162759.1  | -0,075948441 |              | 0 | N.A. | 0 |
| HTRA1       | -0,075961572 | 0,146538296  | 0 | N.A. | 0 |
| AURKC       | -0,076014694 | 0,052051677  | 0 | N.A. | 0 |
| CSTL1       | -0,076016534 | 0,241789426  | 0 | N.A. | 0 |
| AQR         | -0,076071683 | 0,104401525  | 0 | N.A. | 0 |
| MILR1       | -0,076076082 | 0,110926456  | 0 | N.A. | 0 |
| AC007255.8  | -0,076081489 | 0,131468165  | 0 | N.A. | 0 |
| CTD-2260A1  | -0,076090108 | -0,121415304 | 0 | N.A. | 0 |
| FAM111A     | -0,076132505 | -0,135755458 | 0 | N.A. | 0 |
| FAM151B     | -0,076155441 | -0,124038275 | 0 | N.A. | 0 |
| CHGA        | -0,076156245 |              | 0 | N.A. | 0 |
| MYEF2       | -0,076158606 | -0,226850329 | 0 | N.A. | 0 |
| RP1-179N16. | -0,076168762 | -0,09892291  | 0 | N.A. | 0 |
| CYSLTR1     | -0,076194069 | -0,296068138 | 0 | N.A. | 0 |
| OVGP1       | -0,076195223 | -0,296036411 | 0 | N.A. | 0 |
| KLK4        | -0,076220722 | -0,068636712 | 0 | N.A. | 0 |
| RP11-708J19 | -0,076244661 | 0,156577419  | 0 | N.A. | 0 |
| TMEM72      | -0,076245224 | -0,021519532 | 0 | N.A. | 0 |
| TMEM60      | -0,076294369 | -0,188395705 | 0 | N.A. | 0 |
| RP13-20L14. | -0,076297189 | 0,090824085  | 0 | N.A. | 0 |
| ZNF79       | -0,076305609 | -0,071221979 | 0 | N.A. | 0 |
| ZGLP1       | -0,076331127 | -0,177194538 | 0 | N.A. | 0 |
| TMEM123     | -0,076375389 | 0,022455387  | 0 | N.A. | 0 |
| OCA2        | -0,076375704 | -0,070546698 | 0 | N.A. | 0 |
| LETMD1      | -0,076406103 | -0,119142328 | 0 | N.A. | 0 |
| L3MBTL4     | -0,076435751 | 0,09157474   | 0 | N.A. | 0 |

|              |              |              |   |      |   |
|--------------|--------------|--------------|---|------|---|
| DFNB59       | -0,076442257 | 0,001628323  | 0 | N.A. | 0 |
| PRKAR2B      | -0,076445233 | 0,224436225  | 0 | N.A. | 0 |
| RP11-203M5   | -0,076448307 | -0,092980845 | 0 | N.A. | 0 |
| NPPC         | -0,076555552 |              | 0 | N.A. | 0 |
| SLC18A1      | -0,076617378 | 0,003449588  | 0 | N.A. | 0 |
| CTD-2035E11  | -0,076671291 | 0,128199061  | 0 | N.A. | 0 |
| AC097468.4   | -0,076699435 | 0,282039722  | 0 | N.A. | 0 |
| RP5-1186N24  | -0,076726582 | 0,23644011   | 0 | N.A. | 0 |
| NCOA5        | -0,076787025 | -0,203742069 | 0 | N.A. | 0 |
| C11orf65     | -0,076811089 | 0,050940944  | 0 | N.A. | 0 |
| ARSK         | -0,076843879 | 0,002446472  | 0 | N.A. | 0 |
| RP11-403P17  | -0,076862063 |              | 0 | N.A. | 0 |
| ZNF530       | -0,07686548  | -0,157929648 | 0 | N.A. | 0 |
| SYNM         | -0,076874506 | -0,109728548 | 0 | N.A. | 0 |
| MARCH7       | -0,076906031 | 0,170918698  | 0 | N.A. | 0 |
| SH3RF3       | -0,076914537 | -0,169230686 | 0 | N.A. | 0 |
| P2RX6        | -0,077008417 | 0,109900792  | 0 | N.A. | 0 |
| LAPTM4A      | -0,077065932 | 0,243197515  | 0 | N.A. | 0 |
| SLC38A11     | -0,07707227  | 0,009656847  | 0 | N.A. | 0 |
| NEFL         | -0,077075524 |              | 0 | N.A. | 0 |
| RP11-111F5.4 | -0,077137191 | -0,458546214 | 0 | N.A. | 0 |
| RP11-532M2   | -0,077138065 | 0,219805737  | 0 | N.A. | 0 |
| ZNF521       | -0,077180393 | -0,042883996 | 0 | N.A. | 0 |
| LINC00642    | -0,077225734 | 0,218662624  | 0 | N.A. | 0 |
| ZXDA         | -0,077261212 | 0,05476131   | 0 | N.A. | 0 |
| CBFA2T3      | -0,07727357  | -0,015604291 | 0 | N.A. | 0 |
| DDX31        | -0,077350072 | -0,10562969  | 0 | N.A. | 0 |
| PAX6         | -0,077413896 | -0,189520429 | 0 | N.A. | 0 |
| BTG2         | -0,077448658 | -0,129270722 | 0 | N.A. | 0 |
| PEBP4        | -0,077451687 |              | 0 | N.A. | 0 |
| PGRMC2       | -0,077458633 | 0,270432697  | 0 | N.A. | 0 |
| CBLN1        | -0,077480065 | -0,028853954 | 0 | N.A. | 0 |
| MEX3B        | -0,077499689 | 0,037939702  | 0 | N.A. | 0 |

|             |              |              |   |      |   |
|-------------|--------------|--------------|---|------|---|
| RP11-307C12 | -0,077503371 | -0,01697961  | 0 | N.A. | 0 |
| ISL2        | -0,077525474 | -0,001750179 | 0 | N.A. | 0 |
| DCAF4L1     | -0,07754807  | 0,132984116  | 0 | N.A. | 0 |
| ITGB3       | -0,077570331 | 0,333407989  | 0 | N.A. | 0 |
| ATXN3       | -0,077673746 | 0,230833211  | 0 | N.A. | 0 |
| LRP4-AS1    | -0,07767473  | -0,087280508 | 0 | N.A. | 0 |
| RP11-1055B8 | -0,077702299 | 0,06403341   | 0 | N.A. | 0 |
| H1FX        | -0,077706124 | 0,19545181   | 0 | N.A. | 0 |
| ASAH2       | -0,077707402 | -0,07282511  | 0 | N.A. | 0 |
| SIX1        | -0,077711153 | -0,065866323 | 0 | N.A. | 0 |
| LINC01198   | -0,077755801 |              | 0 | N.A. | 0 |
| RAB26       | -0,077816642 | -0,024587471 | 0 | N.A. | 0 |
| PRAF2       | -0,077830127 | -0,123889023 | 0 | N.A. | 0 |
| NOTUM       | -0,07785051  | 0,099901943  | 0 | N.A. | 0 |
| COL24A1     | -0,077860984 |              | 0 | N.A. | 0 |
| AP001626.2  | -0,077862891 | 0,149894727  | 0 | N.A. | 0 |
| WDR24       | -0,077891891 | -0,290830375 | 0 | N.A. | 0 |
| CAMKV       | -0,077897472 |              | 0 | N.A. | 0 |
| KLHDC8B     | -0,077958201 | 0,047668832  | 0 | N.A. | 0 |
| SIAE        | -0,077960524 | -0,028579742 | 0 | N.A. | 0 |
| AC062029.1  | -0,077985356 | 0,126215811  | 0 | N.A. | 0 |
| TSR3        | -0,077991273 | -0,11166232  | 0 | N.A. | 0 |
| SSR1        | -0,078013077 | 0,042491551  | 0 | N.A. | 0 |
| DEPDC7      | -0,078025834 | 0,158884089  | 0 | N.A. | 0 |
| RP11-626G11 | -0,078037044 | -0,212790825 | 0 | N.A. | 0 |
| RP11-425D10 | -0,078080289 |              | 0 | N.A. | 0 |
| SUGP2       | -0,078116363 | 0,098080554  | 0 | N.A. | 0 |
| ZNF177      | -0,078158049 |              | 0 | N.A. | 0 |
| SLC45A1     | -0,078242158 | 0,006092096  | 0 | N.A. | 0 |
| ARL6        | -0,07824235  | -0,158220918 | 0 | N.A. | 0 |
| HOXA6       | -0,07828337  | 0,012503699  | 0 | N.A. | 0 |
| IGLV2-8     | -0,078410789 | -0,075683943 | 0 | N.A. | 0 |
| TXLNB       | -0,078429427 |              | 0 | N.A. | 0 |

|              |              |              |   |      |   |
|--------------|--------------|--------------|---|------|---|
| RP11-173P15  | -0,0784651   | -0,055358158 | 0 | N.A. | 0 |
| RBBP8NL      | -0,078486439 | 0,078257054  | 0 | N.A. | 0 |
| RP11-99A1.2  | -0,078501758 | 0,226985603  | 0 | N.A. | 0 |
| PDGFRL       | -0,078571843 | -0,132144746 | 0 | N.A. | 0 |
| BLOC1S1      | -0,078594688 | -0,229317707 | 0 | N.A. | 0 |
| RP11-996F15  | -0,078600963 | -0,040607495 | 0 | N.A. | 0 |
| ZNF665       | -0,078615902 | -0,121407539 | 0 | N.A. | 0 |
| GID4         | -0,078618932 | -0,297542579 | 0 | N.A. | 0 |
| SLC16A10     | -0,07861918  | -0,156962053 | 0 | N.A. | 0 |
| CALD1        | -0,078640752 | -0,347420536 | 0 | N.A. | 0 |
| CTD-2566J3.1 | -0,078676356 | -0,100877275 | 0 | N.A. | 0 |
| RBM39        | -0,07872818  | 0,245464564  | 0 | N.A. | 0 |
| NUP98        | -0,078772595 | 0,042331099  | 0 | N.A. | 0 |
| IQCH         | -0,078829684 | 0,116980169  | 0 | N.A. | 0 |
| BX004987.4   | -0,078905337 | -0,09034469  | 0 | N.A. | 0 |
| P3H3         | -0,078907867 | -0,263975222 | 0 | N.A. | 0 |
| C2CD4A       | -0,078911243 | -0,119795027 | 0 | N.A. | 0 |
| CCDC174      | -0,078956109 | 0,217420155  | 0 | N.A. | 0 |
| ZNF254       | -0,078977196 | -0,081465218 | 0 | N.A. | 0 |
| RP11-498B4.1 | -0,078989633 | -0,111383691 | 0 | N.A. | 0 |
| RASD2        | -0,078997544 | 0,056162911  | 0 | N.A. | 0 |
| CA7          | -0,079051399 | -0,010242668 | 0 | N.A. | 0 |
| NGLY1        | -0,079058485 | 0,085175148  | 0 | N.A. | 0 |
| CHERP        | -0,079069214 | 0,050569124  | 0 | N.A. | 0 |
| RP5-894D12.1 | -0,079077468 | -0,058066948 | 0 | N.A. | 0 |
| RP11-16N11.1 | -0,079112941 | -0,188458201 | 0 | N.A. | 0 |
| SLC35D3      | -0,07913595  | 0,039119998  | 0 | N.A. | 0 |
| RP11-482D24  | -0,079350476 |              | 0 | N.A. | 0 |
| DIABLO       | -0,079382595 | -0,049158618 | 0 | N.A. | 0 |
| KIAA1328     | -0,079412253 | 0,15521023   | 0 | N.A. | 0 |
| FGF17        | -0,079427816 | -0,019223599 | 0 | N.A. | 0 |
| OTUD6A       | -0,079432767 |              | 0 | N.A. | 0 |
| ZBTB8A       | -0,079439037 | 0,045455915  | 0 | N.A. | 0 |

|              |              |              |   |      |   |
|--------------|--------------|--------------|---|------|---|
| SGCE         | -0,079440247 | -0,124401043 | 0 | N.A. | 0 |
| C16orf86     | -0,079460857 | 0,119390294  | 0 | N.A. | 0 |
| TLX1         | -0,079482972 | 0,307727797  | 0 | N.A. | 0 |
| TOX2         | -0,07954673  | 0,230240568  | 0 | N.A. | 0 |
| INHBE        | -0,079554389 |              | 0 | N.A. | 0 |
| LL09NC01-25  | -0,07958705  | -0,283727266 | 0 | N.A. | 0 |
| CHMP1A       | -0,079604208 | 0,189276184  | 0 | N.A. | 0 |
| ICA1L        | -0,079616384 | -0,049311705 | 0 | N.A. | 0 |
| ANKH         | -0,079623653 | -0,092644052 | 0 | N.A. | 0 |
| CTD-2342J14  | -0,079687192 | 0,030063743  | 0 | N.A. | 0 |
| HVCN1        | -0,079735421 | -0,087172191 | 0 | N.A. | 0 |
| FBXO41       | -0,079775217 | -0,050246671 | 0 | N.A. | 0 |
| STK31        | -0,07984843  | -0,230228206 | 0 | N.A. | 0 |
| IQCE         | -0,079916825 | -0,078596214 | 0 | N.A. | 0 |
| WDR55        | -0,079928163 | 0,115325975  | 0 | N.A. | 0 |
| RP1-102E24.  | -0,080015866 | 0,036387657  | 0 | N.A. | 0 |
| MRC2         | -0,080029706 | -0,031814698 | 0 | N.A. | 0 |
| SERINC4      | -0,080046286 | -0,008219694 | 0 | N.A. | 0 |
| SCRIB        | -0,080053303 | 0,163880366  | 0 | N.A. | 0 |
| KCTD12       | -0,080130626 | -0,065540534 | 0 | N.A. | 0 |
| OGDHL        | -0,080200006 | -0,387182386 | 0 | N.A. | 0 |
| RP11-345J4.5 | -0,080203602 | -0,316731107 | 0 | N.A. | 0 |
| USP16        | -0,080222636 | 0,03599624   | 0 | N.A. | 0 |
| RP11-396C23  | -0,080331929 | -0,106178766 | 0 | N.A. | 0 |
| AC084219.4   | -0,080335506 | -0,048499301 | 0 | N.A. | 0 |
| C3orf17      | -0,080337959 | 0,168623844  | 0 | N.A. | 0 |
| SYTL3        | -0,080361892 | -0,158539195 | 0 | N.A. | 0 |
| SULT4A1      | -0,080362709 |              | 0 | N.A. | 0 |
| VWA3A        | -0,080377511 | -0,035099317 | 0 | N.A. | 0 |
| ETV5         | -0,080388488 | -0,035334117 | 0 | N.A. | 0 |
| FLJ21408     | -0,080426714 | 0,037032811  | 0 | N.A. | 0 |
| INHBA-AS1    | -0,080469721 |              | 0 | N.A. | 0 |
| OSCAR        | -0,080502312 | 0,079546603  | 0 | N.A. | 0 |



|             |              |              |   |      |   |
|-------------|--------------|--------------|---|------|---|
| RP11-126O1. | -0,080547866 | 0,219902451  | 0 | N.A. | 0 |
| CTD-2587H2. | -0,0806234   | 0,092441981  | 0 | N.A. | 0 |
| AC008746.12 | -0,080625659 | 0,129375088  | 0 | N.A. | 0 |
| REG3G       | -0,080658851 |              | 0 | N.A. | 0 |
| RP11-680F8. | -0,080659392 | 0,035761081  | 0 | N.A. | 0 |
| KLK2        | -0,080669678 | 0,367082782  | 0 | N.A. | 0 |
| SMARCC2     | -0,080679299 | 0,362066603  | 0 | N.A. | 0 |
| RP11-848P1. | -0,080729626 | -0,044199663 | 0 | N.A. | 0 |
| NEK8        | -0,080776469 | 0,27771907   | 0 | N.A. | 0 |
| COLCA2      | -0,080839572 | -0,024720173 | 0 | N.A. | 0 |
| ADAT1       | -0,08086212  | -0,214952222 | 0 | N.A. | 0 |
| GRIP2       | -0,080908698 |              | 0 | N.A. | 0 |
| CTB-40H15.4 | -0,080928106 |              | 0 | N.A. | 0 |
| ZFP14       | -0,080943333 | 0,160124112  | 0 | N.A. | 0 |
| RP1-102E24. | -0,08107939  | -0,028424768 | 0 | N.A. | 0 |
| ZNF443      | -0,081132478 | 0,129143336  | 0 | N.A. | 0 |
| RP11-469H8. | -0,081134881 | 0,005302043  | 0 | N.A. | 0 |
| RP13-714J12 | -0,081146234 | 0,248981415  | 0 | N.A. | 0 |
| CTSF        | -0,081155153 | -0,009406808 | 0 | N.A. | 0 |
| PGGT1B      | -0,081177011 | 0,049279277  | 0 | N.A. | 0 |
| TOX         | -0,08121501  | -0,153470947 | 0 | N.A. | 0 |
| CTB-5E10.3  | -0,081219372 | 0,374153739  | 0 | N.A. | 0 |
| RP11-120K24 | -0,081228234 | -0,18568356  | 0 | N.A. | 0 |
| DOPEY1      | -0,081299497 | 0,109664121  | 0 | N.A. | 0 |
| P2RX5       | -0,081432715 | -0,318485275 | 0 | N.A. | 0 |
| EXOC3-AS1   | -0,081451291 | 0,273966537  | 0 | N.A. | 0 |
| CTD-2626G1  | -0,081481039 | -0,189420204 | 0 | N.A. | 0 |
| C1orf127    | -0,081493348 |              | 0 | N.A. | 0 |
| RP11-20E24. | -0,081513852 | -0,261463662 | 0 | N.A. | 0 |
| THBS4       | -0,081521671 | 0,01535409   | 0 | N.A. | 0 |
| RP11-443B20 | -0,081541261 | 0,38450048   | 0 | N.A. | 0 |
| RP11-535A5. | -0,081571181 |              | 0 | N.A. | 0 |
| FNDC4       | -0,08157293  | -0,205518724 | 0 | N.A. | 0 |

|             |              |              |   |      |   |
|-------------|--------------|--------------|---|------|---|
| STARD9      | -0,081645947 | 0,006551566  | 0 | N.A. | 0 |
| RAB11FIP3   | -0,081698783 | 0,130984601  | 0 | N.A. | 0 |
| ANKRD17     | -0,081702965 | 0,209109634  | 0 | N.A. | 0 |
| ZNRF3-AS1   | -0,081711048 | -0,056694524 | 0 | N.A. | 0 |
| ETHE1       | -0,081750138 | 0,120229077  | 0 | N.A. | 0 |
| AC004791.2  | -0,081757591 |              | 0 | N.A. | 0 |
| RP11-290H9. | -0,081845903 | 0,010004181  | 0 | N.A. | 0 |
| ZNF211      | -0,081848686 | -0,010757137 | 0 | N.A. | 0 |
| CNPY1       | -0,081861221 | 0,197301238  | 0 | N.A. | 0 |
| ENPP2       | -0,081897086 | 0,225457976  | 0 | N.A. | 0 |
| RP11-849F2. | -0,081907184 |              | 0 | N.A. | 0 |
| RP1-261G23. | -0,081928043 | 0,294435373  | 0 | N.A. | 0 |
| ASL         | -0,081934772 | 0,247536611  | 0 | N.A. | 0 |
| RP11-620J15 | -0,082018833 | -0,306253156 | 0 | N.A. | 0 |
| EPM2A       | -0,082036233 | 0,002456836  | 0 | N.A. | 0 |
| SLC25A20    | -0,082050709 | -0,085775496 | 0 | N.A. | 0 |
| HIST1H2BK   | -0,082051358 | 0,01828579   | 0 | N.A. | 0 |
| SNHG22      | -0,082068348 | 0,091861569  | 0 | N.A. | 0 |
| SLC38A3     | -0,082106898 |              | 0 | N.A. | 0 |
| CLN5        | -0,082116847 | 0,268511468  | 0 | N.A. | 0 |
| GTF2F1      | -0,082124894 | 0,116650018  | 0 | N.A. | 0 |
| NTS         | -0,082125246 | -0,239189159 | 0 | N.A. | 0 |
| RP5-855F16. | -0,082156382 | -0,250029806 | 0 | N.A. | 0 |
| DNAJC18     | -0,082195311 | 0,063450875  | 0 | N.A. | 0 |
| COLCA1      | -0,082214753 | -0,232602615 | 0 | N.A. | 0 |
| CTD-2020K17 | -0,082237514 | -0,08998221  | 0 | N.A. | 0 |
| RP11-290F24 | -0,08223955  | 0,030374935  | 0 | N.A. | 0 |
| AC145212.2  | -0,082247651 | -0,084022609 | 0 | N.A. | 0 |
| ZNF184      | -0,082279722 | -0,261972132 | 0 | N.A. | 0 |
| CTC-332L22. | -0,082309795 | 0,025198908  | 0 | N.A. | 0 |
| SAMD14      | -0,08234466  | 0,220191874  | 0 | N.A. | 0 |
| TUBB1       | -0,08234524  |              | 0 | N.A. | 0 |
| FHOD3       | -0,082347248 | -0,127413632 | 0 | N.A. | 0 |

|             |              |              |   |      |   |
|-------------|--------------|--------------|---|------|---|
| SACM1L      | -0,082362109 | -0,02804     | 0 | N.A. | 0 |
| CYHR1       | -0,082376295 | 0,432621282  | 0 | N.A. | 0 |
| RP11-181C3. | -0,082450959 | -0,17897879  | 0 | N.A. | 0 |
| PRR19       | -0,082455943 | 0,155119466  | 0 | N.A. | 0 |
| MS4A4A      | -0,082456709 | -0,341802228 | 0 | N.A. | 0 |
| C19orf44    | -0,082490924 | 0,092665894  | 0 | N.A. | 0 |
| CCDC71      | -0,082493349 | -0,168216671 | 0 | N.A. | 0 |
| NPAT        | -0,082573304 | 0,353257204  | 0 | N.A. | 0 |
| CMC4        | -0,082578146 | -0,156512036 | 0 | N.A. | 0 |
| COQ10A      | -0,082597971 | 0,211000446  | 0 | N.A. | 0 |
| ELOVL5      | -0,082676873 | -0,123920004 | 0 | N.A. | 0 |
| TANGO6      | -0,082700691 | -0,038555276 | 0 | N.A. | 0 |
| LENG1       | -0,082734159 | 0,166278992  | 0 | N.A. | 0 |
| XX-FW80269  | -0,082749537 |              | 0 | N.A. | 0 |
| PAM16       | -0,082802758 | -0,377088242 | 0 | N.A. | 0 |
| BICD1       | -0,082814109 | 0,098431789  | 0 | N.A. | 0 |
| PLCG1-AS1   | -0,08284868  | -0,101723004 | 0 | N.A. | 0 |
| IRF2BPL     | -0,082981069 | 0,114306832  | 0 | N.A. | 0 |
| DNALI1      | -0,083002996 | -0,250483245 | 0 | N.A. | 0 |
| ZNF709      | -0,083054116 | -0,122045274 | 0 | N.A. | 0 |
| GALNT16     | -0,083059168 |              | 0 | N.A. | 0 |
| STXBP4      | -0,083166647 | 0,027022783  | 0 | N.A. | 0 |
| ATP5S       | -0,083183868 | -0,022815431 | 0 | N.A. | 0 |
| LSM11       | -0,083297735 | -0,114382405 | 0 | N.A. | 0 |
| PPP2R4      | -0,083321335 | -0,077933064 | 0 | N.A. | 0 |
| SLC18A2     | -0,083321952 | 0,086408698  | 0 | N.A. | 0 |
| SMYD4       | -0,083404761 | 0,10295633   | 0 | N.A. | 0 |
| RP11-380N8. | -0,083411359 | 0,127693305  | 0 | N.A. | 0 |
| APCDD1      | -0,083442263 | -0,220557307 | 0 | N.A. | 0 |
| IFITM1      | -0,083451997 | -0,156882253 | 0 | N.A. | 0 |
| ARIH2OS     | -0,083481896 | -0,000715627 | 0 | N.A. | 0 |
| CTD-3131K8. | -0,083492142 | -0,080340317 | 0 | N.A. | 0 |
| RP11-123B3. | -0,08349236  |              | 0 | N.A. | 0 |

|              |              |              |   |      |   |
|--------------|--------------|--------------|---|------|---|
| DEPDC4       | -0,083497622 | -0,084115929 | 0 | N.A. | 0 |
| HIST1H4A     | -0,083519445 | 0,022160425  | 0 | N.A. | 0 |
| SCGB1B2P     | -0,083522058 | -0,077829431 | 0 | N.A. | 0 |
| IDNK         | -0,083528257 | -0,012454216 | 0 | N.A. | 0 |
| TRAPPC2      | -0,083549119 | -0,080404263 | 0 | N.A. | 0 |
| IFT80        | -0,083551589 | -0,19694137  | 0 | N.A. | 0 |
| FAM154B      | -0,083557691 | -0,236954426 | 0 | N.A. | 0 |
| INPP5B       | -0,083566919 | 0,006962911  | 0 | N.A. | 0 |
| SEC22A       | -0,083609945 | -0,158410102 | 0 | N.A. | 0 |
| CD99L2       | -0,083612767 | -0,176375733 | 0 | N.A. | 0 |
| NME5         | -0,083623145 | 0,172824626  | 0 | N.A. | 0 |
| RP11-360L9.4 | -0,083654191 | -0,07191456  | 0 | N.A. | 0 |
| LINC00639    | -0,083674593 | -0,15384164  | 0 | N.A. | 0 |
| ULK4         | -0,083682569 | -0,021690546 | 0 | N.A. | 0 |
| TEX12        | -0,083699787 | -0,23114849  | 0 | N.A. | 0 |
| RP11-111J6.2 | -0,083785252 | -0,080757973 | 0 | N.A. | 0 |
| RP11-231G3.1 | -0,083787123 | 0,132641239  | 0 | N.A. | 0 |
| FOS          | -0,083795064 | 0,317466015  | 0 | N.A. | 0 |
| GRIN2C       | -0,083806549 | -0,07201275  | 0 | N.A. | 0 |
| KPNA5        | -0,083815924 | 0,097521519  | 0 | N.A. | 0 |
| ZNF853       | -0,083833633 |              | 0 | N.A. | 0 |
| NOS3         | -0,083859594 | 0,042510795  | 0 | N.A. | 0 |
| STXBP1       | -0,083870195 | 0,338675437  | 0 | N.A. | 0 |
| PGK1         | -0,083871559 | 0,083877009  | 0 | N.A. | 0 |
| RP11-136K7.1 | -0,083873978 |              | 0 | N.A. | 0 |
| RP4-605O3.4  | -0,08392366  | 0,233049543  | 0 | N.A. | 0 |
| CRTC1        | -0,083939982 | -0,131797904 | 0 | N.A. | 0 |
| PRRT3        | -0,084042152 | 0,187761518  | 0 | N.A. | 0 |
| ZBED1        | -0,084042395 | -0,123034247 | 0 | N.A. | 0 |
| RP3-337H4.1  | -0,084059592 |              | 0 | N.A. | 0 |
| ABHD1        | -0,084129488 | -0,135586257 | 0 | N.A. | 0 |
| MAN2A2       | -0,0841435   | 0,045847167  | 0 | N.A. | 0 |
| CRACR2A      | -0,084144106 | -0,189594616 | 0 | N.A. | 0 |

|              |              |              |   |      |   |
|--------------|--------------|--------------|---|------|---|
| RP11-320M2   | -0,084163251 | -0,108555264 | 0 | N.A. | 0 |
| RP6-65G23.3  | -0,084202384 | -0,153352813 | 0 | N.A. | 0 |
| RP4-755D9.1  | -0,084240644 |              | 0 | N.A. | 0 |
| BBS1         | -0,084259614 | -0,246536634 | 0 | N.A. | 0 |
| CIART        | -0,084289687 | 0,186392179  | 0 | N.A. | 0 |
| RP11-294J22  | -0,08434395  | -0,088856695 | 0 | N.A. | 0 |
| NLRP11       | -0,084373349 |              | 0 | N.A. | 0 |
| PCSK9        | -0,084378695 | 0,218669368  | 0 | N.A. | 0 |
| SYT11        | -0,084387163 | -0,132479793 | 0 | N.A. | 0 |
| LINC01117    | -0,084429531 |              | 0 | N.A. | 0 |
| MATN1        | -0,084442501 |              | 0 | N.A. | 0 |
| ZNF613       | -0,084455975 | -0,151834212 | 0 | N.A. | 0 |
| HIST1H2AJ    | -0,084485601 | -0,104304701 | 0 | N.A. | 0 |
| AP006621.5   | -0,084520432 | -0,025764563 | 0 | N.A. | 0 |
| MYRIP        | -0,084537558 | -0,158282958 | 0 | N.A. | 0 |
| MED7         | -0,084596292 | -0,246778567 | 0 | N.A. | 0 |
| PTGER2       | -0,084598654 | -0,187914196 | 0 | N.A. | 0 |
| SBK1         | -0,084607223 | -0,196139358 | 0 | N.A. | 0 |
| CTC-471J1.11 | -0,084649165 | -0,324481836 | 0 | N.A. | 0 |
| ZKSCAN2      | -0,084752874 | 0,055171802  | 0 | N.A. | 0 |
| CTD-2256P15  | -0,084767661 | -0,046153732 | 0 | N.A. | 0 |
| RP11-664D1.  | -0,084773706 |              | 0 | N.A. | 0 |
| SAMD10       | -0,084808122 | -0,092651279 | 0 | N.A. | 0 |
| SPTBN2       | -0,084863225 | 0,348709407  | 0 | N.A. | 0 |
| RP11-738E22  | -0,084900947 |              | 0 | N.A. | 0 |
| GRB14        | -0,084908567 | -0,003215956 | 0 | N.A. | 0 |
| C5orf28      | -0,084916203 | -0,162967056 | 0 | N.A. | 0 |
| CCNT2-AS1    | -0,084967641 | 0,063292504  | 0 | N.A. | 0 |
| MSH4         | -0,084970389 | 0,109800919  | 0 | N.A. | 0 |
| PDX1         | -0,084977427 | -0,103715096 | 0 | N.A. | 0 |
| RP3-466P17.  | -0,084982846 |              | 0 | N.A. | 0 |
| CTA-293F17.  | -0,08500499  | -0,26042629  | 0 | N.A. | 0 |
| C10orf82     | -0,085041143 | 0,074439041  | 0 | N.A. | 0 |

|              |              |              |   |      |   |
|--------------|--------------|--------------|---|------|---|
| RASSF10      | -0,085049209 | -0,191546227 | 0 | N.A. | 0 |
| ZNF519       | -0,085063752 | -0,102773211 | 0 | N.A. | 0 |
| RP4-545L17.1 | -0,085100701 | -0,058588263 | 0 | N.A. | 0 |
| CLDND2       | -0,085133781 | -0,081690088 | 0 | N.A. | 0 |
| CTD-2553L13  | -0,085135643 | -0,083929656 | 0 | N.A. | 0 |
| DMRT2        | -0,085137423 | -0,155224171 | 0 | N.A. | 0 |
| CTD-2410N1   | -0,085141092 | -0,010759682 | 0 | N.A. | 0 |
| CYP2B6       | -0,085144469 | -0,109585727 | 0 | N.A. | 0 |
| SPATA7       | -0,08518219  | -0,127737138 | 0 | N.A. | 0 |
| ZNF490       | -0,08519297  | 0,025899702  | 0 | N.A. | 0 |
| RAB3D        | -0,085285524 | -0,143711551 | 0 | N.A. | 0 |
| TMEM141      | -0,085357809 | 0,170333793  | 0 | N.A. | 0 |
| RP11-30P6.6  | -0,085389569 | -0,025971063 | 0 | N.A. | 0 |
| HSPA1B       | -0,085390883 | 0,12233952   | 0 | N.A. | 0 |
| RP5-1121E10  | -0,085499861 | 0,015084526  | 0 | N.A. | 0 |
| CD70         | -0,085509635 | -0,09652867  | 0 | N.A. | 0 |
| RP11-736K20  | -0,085526566 | -0,140443697 | 0 | N.A. | 0 |
| ROBO1        | -0,085543726 | 0,248785216  | 0 | N.A. | 0 |
| CTB-3204.2   | -0,085564464 | 0,146388921  | 0 | N.A. | 0 |
| RP11-1275H2  | -0,085601129 | 0,176265522  | 0 | N.A. | 0 |
| RP11-6N17.6  | -0,08560942  | 0,17238512   | 0 | N.A. | 0 |
| ICK          | -0,085618132 | -0,08393627  | 0 | N.A. | 0 |
| WRNIP1       | -0,085671084 | -0,118901725 | 0 | N.A. | 0 |
| FKTN         | -0,085686301 | -0,026460005 | 0 | N.A. | 0 |
| NXF1         | -0,085723239 | 0,088612286  | 0 | N.A. | 0 |
| RP11-497G19  | -0,085731048 |              | 0 | N.A. | 0 |
| RP11-539I5.1 | -0,085748609 | -0,120880055 | 0 | N.A. | 0 |
| FBXO36       | -0,085766687 | -0,006054332 | 0 | N.A. | 0 |
| C11orf71     | -0,085775395 | 0,018299704  | 0 | N.A. | 0 |
| LRMP         | -0,08577941  | -0,091601248 | 0 | N.A. | 0 |
| ZNF415       | -0,085802163 | -0,189563646 | 0 | N.A. | 0 |
| CCL11        | -0,08582552  | -0,13256801  | 0 | N.A. | 0 |
| MED9         | -0,085854073 | -0,21636372  | 0 | N.A. | 0 |

|             |              |              |   |      |   |
|-------------|--------------|--------------|---|------|---|
| SLC7A4      | -0,085871696 | 0,226919637  | 0 | N.A. | 0 |
| RBM34       | -0,085879733 | 0,015735675  | 0 | N.A. | 0 |
| MPP2        | -0,085883569 |              | 0 | N.A. | 0 |
| RP11-247L20 | -0,085981868 | -0,172151894 | 0 | N.A. | 0 |
| TMEM62      | -0,085984306 | 0,105291659  | 0 | N.A. | 0 |
| AC099850.1  | -0,086082703 | -0,097802457 | 0 | N.A. | 0 |
| MYOM2       | -0,086130886 | 0,060368206  | 0 | N.A. | 0 |
| NELFB       | -0,086139353 | 0,149917597  | 0 | N.A. | 0 |
| HIST4H4     | -0,086219457 | -0,158649099 | 0 | N.A. | 0 |
| EXOG        | -0,086223401 | 0,268637706  | 0 | N.A. | 0 |
| RP11-499F3. | -0,08627345  |              | 0 | N.A. | 0 |
| TRBC2       | -0,08632265  | -0,185996289 | 0 | N.A. | 0 |
| FIRRE       | -0,086323155 | 0,123064926  | 0 | N.A. | 0 |
| NSUN7       | -0,086350782 | -0,342739996 | 0 | N.A. | 0 |
| KIAA1456    | -0,086355955 | 0,032983962  | 0 | N.A. | 0 |
| SERF2       | -0,086400331 | -0,280849697 | 0 | N.A. | 0 |
| ARHGAP19    | -0,086475982 | -0,173068971 | 0 | N.A. | 0 |
| ZNF674-AS1  | -0,086476394 | -0,050814576 | 0 | N.A. | 0 |
| ADAM15      | -0,086503465 | 0,366128756  | 0 | N.A. | 0 |
| ZNF747      | -0,086531794 | 0,000269079  | 0 | N.A. | 0 |
| CFL2        | -0,086569005 | -0,065853851 | 0 | N.A. | 0 |
| GLDC        | -0,086584787 | 0,176638557  | 0 | N.A. | 0 |
| RP11-545D19 | -0,08658657  | 0,272800237  | 0 | N.A. | 0 |
| DMD         | -0,086640645 | 0,000225264  | 0 | N.A. | 0 |
| RP5-899E9.1 | -0,08664591  |              | 0 | N.A. | 0 |
| HIST1H4B    | -0,08664962  | -0,110069828 | 0 | N.A. | 0 |
| CCDC74B     | -0,086660798 |              | 0 | N.A. | 0 |
| C16orf95    | -0,086716329 | -0,049714542 | 0 | N.A. | 0 |
| GPC2        | -0,086812369 | 0,008056528  | 0 | N.A. | 0 |
| LINC00526   | -0,086831558 | -0,396341226 | 0 | N.A. | 0 |
| UGT2B15     | -0,086892071 | 0,247310454  | 0 | N.A. | 0 |
| TGM3        | -0,086975169 | -0,160197039 | 0 | N.A. | 0 |
| PCCA        | -0,086980618 | -0,217287988 | 0 | N.A. | 0 |

|             |              |              |   |      |   |
|-------------|--------------|--------------|---|------|---|
| LINC00114   | -0,087055058 | -0,185022828 | 0 | N.A. | 0 |
| FAM76B      | -0,087073782 | 0,113120464  | 0 | N.A. | 0 |
| LONP1       | -0,087102925 | 0,153273782  | 0 | N.A. | 0 |
| ABCF3       | -0,08714412  | 0,150516111  | 0 | N.A. | 0 |
| FRS3        | -0,087151415 | -0,234274284 | 0 | N.A. | 0 |
| STEAP1      | -0,087165936 | 0,273039413  | 0 | N.A. | 0 |
| DDX5        | -0,087198552 | 0,262997613  | 0 | N.A. | 0 |
| NMUR1       | -0,087210183 | 0,063444968  | 0 | N.A. | 0 |
| DKFZP434I07 | -0,087238179 | 0,122186356  | 0 | N.A. | 0 |
| ZNF77       | -0,087309762 | 0,027286103  | 0 | N.A. | 0 |
| ATP6V0B     | -0,087410077 | 0,277228372  | 0 | N.A. | 0 |
| TMEM203     | -0,087435601 | 0,1679572    | 0 | N.A. | 0 |
| SRD5A1      | -0,087499142 | -0,044541817 | 0 | N.A. | 0 |
| SPPL2B      | -0,087519068 | 0,321854849  | 0 | N.A. | 0 |
| ZNF711      | -0,087543413 | -0,064433391 | 0 | N.A. | 0 |
| TRIM46      | -0,0875528   | 0,010463906  | 0 | N.A. | 0 |
| USB1        | -0,087565278 | -0,152041229 | 0 | N.A. | 0 |
| SMIM10      | -0,087614139 | -0,367901167 | 0 | N.A. | 0 |
| CDHR3       | -0,087623331 | 0,064470843  | 0 | N.A. | 0 |
| GRTP1       | -0,087625194 | 0,215716055  | 0 | N.A. | 0 |
| RP11-422P24 | -0,087647664 | -0,193740329 | 0 | N.A. | 0 |
| ZNF124      | -0,087723528 | -0,210621279 | 0 | N.A. | 0 |
| RP11-195B3. | -0,087736087 |              | 0 | N.A. | 0 |
| BCL7A       | -0,087778964 | -0,21339539  | 0 | N.A. | 0 |
| RND2        | -0,087831284 | -0,060731603 | 0 | N.A. | 0 |
| SCGN        | -0,088011126 |              | 1 | none | 0 |
| ZNF589      | -0,08811788  | -0,022584752 | 0 | N.A. | 0 |
| CENPBD1     | -0,088184919 | -0,104587799 | 0 | N.A. | 0 |
| SPATA24     | -0,088203942 | -0,132470475 | 0 | N.A. | 0 |
| ANKRD36     | -0,08822171  | -0,101631327 | 0 | N.A. | 0 |
| APOE        | -0,088238094 | -0,264054525 | 0 | N.A. | 0 |
| DCAF15      | -0,088272361 | -0,153945892 | 0 | N.A. | 0 |
| RP5-1159O4. | -0,088327054 | 0,198470035  | 0 | N.A. | 0 |



|              |              |              |   |      |   |
|--------------|--------------|--------------|---|------|---|
| TSPO         | -0,088335913 | 0,176268154  | 0 | N.A. | 0 |
| POMC         | -0,088341874 | 0,333902142  | 0 | N.A. | 0 |
| KCNE4        | -0,088354052 | 0,214203606  | 0 | N.A. | 0 |
| RP11-181G11  | -0,088384689 | 0,022793764  | 0 | N.A. | 0 |
| OVOL3        | -0,088474618 | 0,240972955  | 0 | N.A. | 0 |
| DDHD2        | -0,088531901 | 0,046174011  | 0 | N.A. | 0 |
| PLBD1-AS1    | -0,088540399 | 0,200859244  | 0 | N.A. | 0 |
| BTBD17       | -0,088574646 | 0,239363182  | 0 | N.A. | 0 |
| FAM179B      | -0,08860971  | 0,100403235  | 0 | N.A. | 0 |
| C22orf46     | -0,088677898 | 0,05348106   | 0 | N.A. | 0 |
| NEXN         | -0,088708269 | -0,12072352  | 0 | N.A. | 0 |
| AC003075.4   | -0,088766406 | -0,153419294 | 0 | N.A. | 0 |
| RP11-79P5.9  | -0,088881409 | 0,098077411  | 0 | N.A. | 0 |
| CNNM3        | -0,088895478 | 0,137980749  | 0 | N.A. | 0 |
| TMEM67       | -0,088905223 | 0,249297265  | 0 | N.A. | 0 |
| DDX39B-AS1   | -0,088934875 | 0,049031941  | 0 | N.A. | 0 |
| CTBP1-AS2    | -0,088960788 | -1,44841E-05 | 0 | N.A. | 0 |
| FGF8         | -0,088973946 | 0,264041094  | 0 | N.A. | 0 |
| C17orf77     | -0,089012048 | -0,179729665 | 0 | N.A. | 0 |
| RP11-307P5.1 | -0,089057682 | 0,089170759  | 0 | N.A. | 0 |
| NXT2         | -0,089073133 | -0,465973636 | 0 | N.A. | 0 |
| HSPA1A       | -0,089087998 | 0,180886641  | 0 | N.A. | 0 |
| GTF2H4       | -0,089118201 | 0,063735614  | 0 | N.A. | 0 |
| PHC1         | -0,089145412 | 0,114677892  | 0 | N.A. | 0 |
| CEP290       | -0,089173031 | 0,192073362  | 0 | N.A. | 0 |
| ZFY          | -0,089206577 | -0,167121357 | 0 | N.A. | 0 |
| GPR137C      | -0,08925139  |              | 0 | N.A. | 0 |
| ACTL10       | -0,089266079 | 0,040127302  | 0 | N.A. | 0 |
| KCNMB2-AS1   | -0,089266302 | 0,048183     | 0 | N.A. | 0 |
| XXbac-B444P  | -0,089373394 | 0,134571427  | 0 | N.A. | 0 |
| TMEM194B     | -0,089373671 | -0,323108887 | 0 | N.A. | 0 |
| AC013463.2   | -0,089441444 |              | 0 | N.A. | 0 |
| TTC4         | -0,089442192 | -0,031542878 | 0 | N.A. | 0 |

|             |              |              |   |      |   |
|-------------|--------------|--------------|---|------|---|
| CDPF1       | -0,089521213 | 0,030755021  | 0 | N.A. | 0 |
| ICOS        | -0,089662713 | 0,028333334  | 0 | N.A. | 0 |
| RP11-547D24 | -0,089663275 |              | 0 | N.A. | 0 |
| VWA5B2      | -0,089708096 | 0,004537914  | 0 | N.A. | 0 |
| KCTD15      | -0,089759492 | -0,1596563   | 0 | N.A. | 0 |
| GPT2        | -0,089765251 | -0,123159751 | 0 | N.A. | 0 |
| MED6        | -0,089815034 | -0,020991083 | 0 | N.A. | 0 |
| ADAM22      | -0,089831016 | -0,174301094 | 0 | N.A. | 0 |
| NUPL1       | -0,089836004 | 0,19045615   | 0 | N.A. | 0 |
| PDIK1L      | -0,089836633 | -0,182568994 | 0 | N.A. | 0 |
| CEP68       | -0,089873048 | -0,217644382 | 0 | N.A. | 0 |
| TNN         | -0,089930812 | 0,010348121  | 0 | N.A. | 0 |
| FAM13C      | -0,089954331 |              | 0 | N.A. | 0 |
| PHIP        | -0,089980635 | 0,192461171  | 0 | N.A. | 0 |
| SV2A        | -0,090005876 |              | 0 | N.A. | 0 |
| SNX20       | -0,090028239 | -0,222420462 | 0 | N.A. | 0 |
| AC142472.6  | -0,090055845 | -0,1951159   | 0 | N.A. | 0 |
| ANGEL1      | -0,090133585 | 0,03593714   | 0 | N.A. | 0 |
| INTS9       | -0,090162628 | -0,022122262 | 0 | N.A. | 0 |
| APPBP2      | -0,090163111 | -0,041255384 | 0 | N.A. | 0 |
| DTWD2       | -0,090189846 | -0,081824882 | 0 | N.A. | 0 |
| RP11-403I13 | -0,090197163 | 0,094935395  | 0 | N.A. | 0 |
| RABGGTA     | -0,090212173 | 0,022378331  | 0 | N.A. | 0 |
| FAM122B     | -0,090214369 | -0,024233713 | 0 | N.A. | 0 |
| PLA2G7      | -0,09027453  | 0,277770782  | 0 | N.A. | 0 |
| ATR         | -0,090275726 | -0,141352796 | 0 | N.A. | 0 |
| RP11-527D7. | -0,090367621 |              | 0 | N.A. | 0 |
| IFT27       | -0,09039797  | 0,02067136   | 0 | N.A. | 0 |
| POMGNT2     | -0,090415316 | -0,103212002 | 0 | N.A. | 0 |
| AP001462.6  | -0,090441684 | 0,332962447  | 0 | N.A. | 0 |
| PAN3-AS1    | -0,090446905 | -0,03973758  | 0 | N.A. | 0 |
| RPRD2       | -0,090483902 | 0,261660332  | 0 | N.A. | 0 |
| TSGA10      | -0,090507974 | -0,221299505 | 0 | N.A. | 0 |

|              |              |              |   |      |   |
|--------------|--------------|--------------|---|------|---|
| C6orf52      | -0,090514244 | -0,043994944 | 0 | N.A. | 0 |
| ACOT8        | -0,090519862 | -0,221774728 | 0 | N.A. | 0 |
| NUDT16       | -0,090533627 | -0,042804398 | 0 | N.A. | 0 |
| JAKMIP1      | -0,090624919 |              | 0 | N.A. | 0 |
| JAM2         | -0,09064259  | -0,045016488 | 0 | N.A. | 0 |
| C1orf27      | -0,090710669 | -0,120222216 | 0 | N.A. | 0 |
| UBE2L6       | -0,090760196 | -0,330342727 | 0 | N.A. | 0 |
| AK7          | -0,09079246  | 0,063139261  | 0 | N.A. | 0 |
| TMEM208      | -0,090793837 | 0,430283966  | 0 | N.A. | 0 |
| PAPSS1       | -0,090810573 | -0,064657918 | 0 | N.A. | 0 |
| RP11-379H18  | -0,090866091 | 0,14292389   | 0 | N.A. | 0 |
| PGAP1        | -0,090900179 | -0,024568745 | 0 | N.A. | 0 |
| ARFIP1       | -0,090920343 | 0,065743945  | 0 | N.A. | 0 |
| RP11-545I5.3 | -0,090926504 | 0,075534833  | 0 | N.A. | 0 |
| ZNF287       | -0,09094435  | 0,250017843  | 0 | N.A. | 0 |
| BOC          | -0,09099058  | 0,156137809  | 0 | N.A. | 0 |
| TRAT1        | -0,091061361 | -0,376712579 | 0 | N.A. | 0 |
| SLC48A1      | -0,091073114 | 0,05959144   | 0 | N.A. | 0 |
| RCN3         | -0,091176057 | -0,014006017 | 0 | N.A. | 0 |
| MAP3K12      | -0,091177863 | -0,077725421 | 0 | N.A. | 0 |
| KIAA1324L    | -0,09126593  | -0,09386671  | 0 | N.A. | 0 |
| GTF3C2       | -0,091276805 | 0,126744125  | 0 | N.A. | 0 |
| KIAA1147     | -0,091313974 | 0,025869258  | 0 | N.A. | 0 |
| RHPN1        | -0,091318296 | -0,156646761 | 0 | N.A. | 0 |
| SRSF12       | -0,09153488  | -0,125461221 | 0 | N.A. | 0 |
| ISL1         | -0,091603399 | -0,008689685 | 0 | N.A. | 0 |
| SEPT3        | -0,091630238 | 0,064409311  | 0 | N.A. | 0 |
| ZNF436-AS1   | -0,091654051 | 0,037132358  | 0 | N.A. | 0 |
| RP11-386I14  | -0,091693437 | 0,091767191  | 0 | N.A. | 0 |
| TLK1         | -0,091718181 | 0,253788817  | 0 | N.A. | 0 |
| HARS2        | -0,091724727 | 0,251271186  | 0 | N.A. | 0 |
| CCDC60       | -0,091724972 | -0,492175277 | 0 | N.A. | 0 |
| C6orf120     | -0,091757197 | 0,002793876  | 0 | N.A. | 0 |

|             |              |              |   |      |   |
|-------------|--------------|--------------|---|------|---|
| FAM213A     | -0,091757936 | 0,094182877  | 0 | N.A. | 0 |
| DDX26B-AS1  | -0,091804484 | 0,265846655  | 0 | N.A. | 0 |
| ZNF329      | -0,091812313 | 0,053840267  | 0 | N.A. | 0 |
| FEZF1       | -0,091886483 | -0,13325094  | 0 | N.A. | 0 |
| RP4-777L9.2 | -0,091911495 | -0,287894547 | 0 | N.A. | 0 |
| TROVE2      | -0,091911999 | 0,028283081  | 0 | N.A. | 0 |
| MIAT        | -0,091935294 | -0,163818747 | 0 | N.A. | 0 |
| MIR646HG    | -0,091940028 |              | 0 | N.A. | 0 |
| CTD-2587H1  | -0,091982707 | 0,226985603  | 0 | N.A. | 0 |
| C11orf21    | -0,091990716 |              | 0 | N.A. | 0 |
| ZBTB24      | -0,092032457 | -0,111282825 | 0 | N.A. | 0 |
| CD81-AS1    | -0,092049844 |              | 0 | N.A. | 0 |
| HDGFRP3     | -0,092067206 | -0,12508846  | 0 | N.A. | 0 |
| PTCHD4      | -0,092117222 | -0,338316193 | 0 | N.A. | 0 |
| TRIM73      | -0,09211814  | -0,199114253 | 0 | N.A. | 0 |
| LYG2        | -0,092147491 |              | 0 | N.A. | 0 |
| RP1-27K12.2 | -0,092193956 |              | 0 | N.A. | 0 |
| AC012506.4  | -0,092228438 |              | 0 | N.A. | 0 |
| ZNF594      | -0,092242589 | 0,009804659  | 0 | N.A. | 0 |
| SYAP1       | -0,092276658 | 0,102929545  | 0 | N.A. | 0 |
| RP11-713M1  | -0,092424389 | -0,20612478  | 0 | N.A. | 0 |
| ATP10D      | -0,092439941 | 0,079965368  | 0 | N.A. | 0 |
| TMEM210     | -0,092445181 | -0,010114837 | 0 | N.A. | 0 |
| PEX1        | -0,09249512  | -0,005720342 | 0 | N.A. | 0 |
| FRMD6-AS1   | -0,092496234 | -0,00597368  | 0 | N.A. | 0 |
| LINC01534   | -0,092498039 | -0,307479721 | 0 | N.A. | 0 |
| RP11-798M1  | -0,092522539 | -0,127857404 | 0 | N.A. | 0 |
| RSPH14      | -0,092551399 | -0,291603812 | 0 | N.A. | 0 |
| ZNF595      | -0,092562715 | 0,280586706  | 0 | N.A. | 0 |
| GIMAP7      | -0,092569518 | -0,286637273 | 0 | N.A. | 0 |
| LARP4       | -0,092578644 | 0,011654971  | 0 | N.A. | 0 |
| RP4-680D5.2 | -0,092601983 | 0,010096112  | 0 | N.A. | 0 |
| ZNF583      | -0,092658927 | -0,203013925 | 0 | N.A. | 0 |

|             |              |              |   |      |   |
|-------------|--------------|--------------|---|------|---|
| AC104820.2  | -0,092659693 | -0,088758096 | 0 | N.A. | 0 |
| RTN1        | -0,092795296 | -0,274394986 | 0 | N.A. | 0 |
| CASS4       | -0,092813314 |              | 0 | N.A. | 0 |
| GP2         | -0,092832367 | 0,001005435  | 0 | N.A. | 0 |
| EYA1        | -0,092844764 | -0,293304492 | 0 | N.A. | 0 |
| LINC01572   | -0,092927124 | -0,06489314  | 0 | N.A. | 0 |
| MLLT11      | -0,092927297 | -0,223846627 | 0 | N.A. | 0 |
| CHD7        | -0,092962146 | 0,141826738  | 0 | N.A. | 0 |
| KSR2        | -0,092988312 | -0,087119737 | 0 | N.A. | 0 |
| TRIM72      | -0,092995471 | -0,048029085 | 0 | N.A. | 0 |
| HAMP        | -0,093037469 |              | 0 | N.A. | 0 |
| LINC01545   | -0,093092728 |              | 0 | N.A. | 0 |
| LY6H        | -0,093153322 | -0,149601982 | 0 | N.A. | 0 |
| HGFAC       | -0,093204522 | -0,085075356 | 0 | N.A. | 0 |
| RAB1A       | -0,093226047 | 0,235365112  | 0 | N.A. | 0 |
| RP13-497K6. | -0,093259605 | -0,18769134  | 0 | N.A. | 0 |
| KDM4A-AS1   | -0,093287251 | -0,01153483  | 0 | N.A. | 0 |
| CDK12       | -0,09331287  | -0,038117395 | 0 | N.A. | 0 |
| CPLX2       | -0,093412216 | 0,171081515  | 0 | N.A. | 0 |
| RP11-626G1. | -0,093415244 |              | 0 | N.A. | 0 |
| RP11-395N3. | -0,093418918 | -0,077098527 | 0 | N.A. | 0 |
| VPS52       | -0,093427551 | -0,073673484 | 0 | N.A. | 0 |
| SCT         | -0,093439719 | 0,326702557  | 0 | N.A. | 0 |
| RABEP2      | -0,093478283 | 0,190770934  | 0 | N.A. | 0 |
| AC024592.9  | -0,093520495 | 0,020781782  | 0 | N.A. | 0 |
| ERP44       | -0,093554709 | 0,069891697  | 0 | N.A. | 0 |
| TBPL1       | -0,093560481 | -0,000197845 | 0 | N.A. | 0 |
| MFI2-AS1    | -0,093579666 | 0,04631249   | 0 | N.A. | 0 |
| FGFBP2      | -0,093651423 |              | 0 | N.A. | 0 |
| B3GALNT1    | -0,093660529 | 0,084916981  | 0 | N.A. | 0 |
| RP11-268P4. | -0,093661739 | 0,153481055  | 0 | N.A. | 0 |
| PRR14       | -0,093688244 | 0,129930272  | 0 | N.A. | 0 |
| AKR1C2      | -0,093693641 | 0,046166811  | 0 | N.A. | 0 |

|             |              |              |   |      |   |
|-------------|--------------|--------------|---|------|---|
| UBQLN4      | -0,09379069  | -0,123751508 | 0 | N.A. | 0 |
| AMER1       | -0,093881956 | -0,042617804 | 0 | N.A. | 0 |
| RP11-432J24 | -0,093960795 | 0,072916664  | 0 | N.A. | 0 |
| IQCK        | -0,094023023 | -0,179621122 | 0 | N.A. | 0 |
| SYCE2       | -0,094033183 | -0,148428596 | 0 | N.A. | 0 |
| ADH1A       | -0,094044225 |              | 0 | N.A. | 0 |
| CHUK        | -0,094060991 | -0,005436715 | 0 | N.A. | 0 |
| ST8SIA1     | -0,094062561 |              | 0 | N.A. | 0 |
| POU2AF1     | -0,094080933 | 0,029133301  | 0 | N.A. | 0 |
| CTC-428H11. | -0,094149402 | -0,228600847 | 0 | N.A. | 0 |
| ZSWIM7      | -0,09416933  | -0,224714852 | 0 | N.A. | 0 |
| FAM110A     | -0,094197432 | 0,069484975  | 0 | N.A. | 0 |
| PDIA5       | -0,094210776 | 0,108817557  | 0 | N.A. | 0 |
| COL13A1     | -0,094216673 | 0,311407799  | 0 | N.A. | 0 |
| EMX2OS      | -0,094278077 | -0,038726245 | 0 | N.A. | 0 |
| COPS2       | -0,09427826  | -0,114101809 | 0 | N.A. | 0 |
| RCBTB2      | -0,094305058 | -0,259106434 | 0 | N.A. | 0 |
| FANCM       | -0,094310678 | -0,013637918 | 0 | N.A. | 0 |
| RP4-798A10. | -0,094323307 | 0,020394221  | 0 | N.A. | 0 |
| TMEM168     | -0,094327128 | 0,186938966  | 0 | N.A. | 0 |
| MYCNOS      | -0,094332921 | 0,031784317  | 0 | N.A. | 0 |
| RP1-239B22. | -0,094382364 | -0,066864238 | 0 | N.A. | 0 |
| TADA1       | -0,094393163 | -0,122537995 | 0 | N.A. | 0 |
| RP11-452L6. | -0,094394484 | 0,003377415  | 0 | N.A. | 0 |
| CRIP3       | -0,094418934 | -0,133315397 | 0 | N.A. | 0 |
| TRIL        | -0,094425894 | 0,212849304  | 0 | N.A. | 0 |
| CTD-2256P15 | -0,094427458 | -0,323038516 | 0 | N.A. | 0 |
| KLK15       | -0,094484189 | -0,086131314 | 0 | N.A. | 0 |
| RP11-258C19 | -0,094494874 | 0,128301732  | 0 | N.A. | 0 |
| SMAD5-AS1   | -0,094516765 | 0,063950191  | 0 | N.A. | 0 |
| LL22NC03-32 | -0,09456622  | -0,056461212 | 0 | N.A. | 0 |
| ASGR1       | -0,094605722 | 0,019409477  | 0 | N.A. | 0 |
| RBL1        | -0,094640375 | -0,10155607  | 0 | N.A. | 0 |

|              |              |              |   |      |   |
|--------------|--------------|--------------|---|------|---|
| RP11-717F1.  | -0,094681691 | -0,168747899 | 0 | N.A. | 0 |
| KLHL7-AS1    | -0,094728569 |              | 0 | N.A. | 0 |
| GMPPA        | -0,094736563 | 0,079619406  | 0 | N.A. | 0 |
| ZDHHC23      | -0,094762645 | 0,029765142  | 0 | N.A. | 0 |
| LINC00864    | -0,094774703 |              | 0 | N.A. | 0 |
| ING4         | -0,094776071 | -0,016461942 | 0 | N.A. | 0 |
| RP11-713P17  | -0,094793459 | 0,208226539  | 0 | N.A. | 0 |
| RP11-180I4.4 | -0,094797308 |              | 0 | N.A. | 0 |
| TRMT10A      | -0,094809082 | 0,034894464  | 0 | N.A. | 0 |
| SF1          | -0,094835021 | 0,101872838  | 0 | N.A. | 0 |
| ZNF596       | -0,094899899 | -0,17767253  | 0 | N.A. | 0 |
| PCF11        | -0,094940575 | 0,07529317   | 0 | N.A. | 0 |
| KIAA2012     | -0,095022907 | 0,058570601  | 0 | N.A. | 0 |
| ZNF786       | -0,095053198 | -0,178709596 | 0 | N.A. | 0 |
| CPS1         | -0,095132508 | 0,228849894  | 0 | N.A. | 0 |
| SERPIND1     | -0,09516892  |              | 0 | N.A. | 0 |
| RP11-22L13.  | -0,095172213 | 0,087693578  | 0 | N.A. | 0 |
| MBLAC2       | -0,095193404 | -0,111937901 | 0 | N.A. | 0 |
| RP5-858L17.  | -0,095301197 |              | 0 | N.A. | 0 |
| MAOA         | -0,095324111 | 0,024527556  | 0 | N.A. | 0 |
| RP11-178L8.  | -0,095343124 |              | 0 | N.A. | 0 |
| PRSS56       | -0,095345952 | -0,08449875  | 0 | N.A. | 0 |
| OLFML3       | -0,095361274 | 0,157530017  | 0 | N.A. | 0 |
| GZF1         | -0,095364273 | 0,3190686    | 0 | N.A. | 0 |
| KCNC2        | -0,095372255 |              | 0 | N.A. | 0 |
| RP11-341N2.  | -0,095401147 | 0,276901645  | 0 | N.A. | 0 |
| UBXN2B       | -0,095405975 | -0,187339756 | 0 | N.A. | 0 |
| PECR         | -0,095422452 | 0,256918039  | 0 | N.A. | 0 |
| CMTM4        | -0,095489669 | 0,188333311  | 0 | N.A. | 0 |
| ZSCAN18      | -0,095493133 | 0,146233309  | 0 | N.A. | 0 |
| ZNF497       | -0,095497214 | 0,136847018  | 0 | N.A. | 0 |
| MOAP1        | -0,095614214 | -0,001624645 | 0 | N.A. | 0 |
| RP11-18H7.1  | -0,095616602 | -0,039262665 | 0 | N.A. | 0 |

|              |              |              |   |      |   |
|--------------|--------------|--------------|---|------|---|
| CACNA2D2     | -0,095640838 | -0,091555266 | 0 | N.A. | 0 |
| HAGHL        | -0,095660691 | 0,208875621  | 0 | N.A. | 0 |
| AKR1C3       | -0,095708753 | -0,066050092 | 0 | N.A. | 0 |
| RP4-758J18.1 | -0,09574373  | 0,06310452   | 0 | N.A. | 0 |
| CD83         | -0,095767342 | -0,413216823 | 0 | N.A. | 0 |
| ATG5         | -0,095794659 | -0,046064308 | 0 | N.A. | 0 |
| DPP10        | -0,095840837 | -0,303838559 | 0 | N.A. | 0 |
| RP11-477J21  | -0,095857806 | 0,438954365  | 0 | N.A. | 0 |
| CDK5R1       | -0,0958624   | 0,123920615  | 0 | N.A. | 0 |
| C1orf105     | -0,095979097 | 0,299583942  | 0 | N.A. | 0 |
| RP11-126K1.  | -0,096018784 |              | 0 | N.A. | 0 |
| AC004012.1   | -0,096025461 | 0,237200699  | 0 | N.A. | 0 |
| ZNF324B      | -0,096052231 | 0,083518572  | 0 | N.A. | 0 |
| B3GALT2      | -0,096056503 | -0,363310443 | 0 | N.A. | 0 |
| RP11-423H2.  | -0,096058502 | -0,044621181 | 0 | N.A. | 0 |
| ARHGEF40     | -0,096107574 | 0,110769862  | 0 | N.A. | 0 |
| RRN3         | -0,096126807 | -0,00532189  | 0 | N.A. | 0 |
| NEK10        | -0,09616087  |              | 0 | N.A. | 0 |
| HARBI1       | -0,096222202 | 0,091007748  | 0 | N.A. | 0 |
| AAMDC        | -0,096242572 | -0,161866568 | 0 | N.A. | 0 |
| REV3L        | -0,096310726 | -0,205206208 | 0 | N.A. | 0 |
| TRABD2B      | -0,09633059  | 0,012605694  | 0 | N.A. | 0 |
| CTD-3032J10  | -0,096331999 |              | 0 | N.A. | 0 |
| TMEM182      | -0,096333653 | -0,059074925 | 0 | N.A. | 0 |
| CAPZB        | -0,096509929 | 0,017909598  | 0 | N.A. | 0 |
| CTC-559E9.1  | -0,096562595 | 0,083839784  | 0 | N.A. | 0 |
| SH2D6        | -0,096600197 | -0,003914008 | 0 | N.A. | 0 |
| HOXA1        | -0,096662515 | 0,057125436  | 0 | N.A. | 0 |
| ANKS6        | -0,0966796   | 0,209224904  | 0 | N.A. | 0 |
| ADAMTSL2     | -0,096737929 | -0,124949143 | 0 | N.A. | 0 |
| LINC01555    | -0,096741168 |              | 0 | N.A. | 0 |
| ADRBK1       | -0,096741382 | 0,30031348   | 0 | N.A. | 0 |
| ACVR2B-AS1   | -0,096777697 |              | 0 | N.A. | 0 |



|              |              |              |   |      |   |
|--------------|--------------|--------------|---|------|---|
| IGF1         | -0,096904117 | -0,066111086 | 0 | N.A. | 0 |
| TSPEAR       | -0,096940994 | 0,126391947  | 0 | N.A. | 0 |
| FLVCR1-AS1   | -0,096996608 | -0,275718588 | 0 | N.A. | 0 |
| DYM          | -0,097120391 | -0,068697298 | 0 | N.A. | 0 |
| FUT7         | -0,097138757 | 0,3986027    | 0 | N.A. | 0 |
| RAB9B        | -0,097157271 | 0,010269904  | 0 | N.A. | 0 |
| C2orf82      | -0,097161182 | -0,123563814 | 0 | N.A. | 0 |
| GLTSCR2      | -0,097192735 | -0,40106412  | 0 | N.A. | 0 |
| KIF24        | -0,097210525 | -0,114073627 | 0 | N.A. | 0 |
| LRRC43       | -0,097222261 | -0,110984828 | 0 | N.A. | 0 |
| TAF2         | -0,097248017 | 0,169897935  | 0 | N.A. | 0 |
| AC008074.3   | -0,097337111 | 0,219484518  | 0 | N.A. | 0 |
| FKBP8        | -0,09738907  | 0,053736854  | 0 | N.A. | 0 |
| SH2B1        | -0,097391037 | 0,057653775  | 0 | N.A. | 0 |
| COL27A1      | -0,097421325 | -0,042343559 | 0 | N.A. | 0 |
| MINPP1       | -0,097491231 | 0,197587493  | 0 | N.A. | 0 |
| NKD1         | -0,097498323 | 0,136124513  | 0 | N.A. | 0 |
| TDRD5        | -0,097508778 | -0,126735818 | 0 | N.A. | 0 |
| RP11-111A2.1 | -0,097560352 | 0,033797437  | 0 | N.A. | 0 |
| CUL5         | -0,097628139 | -0,020164179 | 0 | N.A. | 0 |
| LRRC10B      | -0,097693923 | 0,034703185  | 0 | N.A. | 0 |
| PVRL1        | -0,0977537   | -0,071148221 | 0 | N.A. | 0 |
| RFX5         | -0,097898123 | -0,315572541 | 0 | N.A. | 0 |
| TBL2         | -0,097932804 | 0,100082693  | 0 | N.A. | 0 |
| AC092484.1   | -0,097938846 | -0,28915815  | 0 | N.A. | 0 |
| TWIST2       | -0,09793928  | -0,103620519 | 0 | N.A. | 0 |
| ISYNA1       | -0,098013925 | -0,04520666  | 0 | N.A. | 0 |
| ACPP         | -0,098028062 | 0,355991959  | 0 | N.A. | 0 |
| MBIP         | -0,098041094 | 0,093644417  | 0 | N.A. | 0 |
| GNB2         | -0,098086818 | 0,267464225  | 0 | N.A. | 0 |
| RP11-486G1.1 | -0,09810038  |              | 0 | N.A. | 0 |
| SDCCAG8      | -0,098129756 | 0,10871316   | 0 | N.A. | 0 |
| SYNJ2BP-COX  | -0,098140371 | -0,093778277 | 0 | N.A. | 0 |

|             |              |              |   |      |   |
|-------------|--------------|--------------|---|------|---|
| RP11-467D6. | -0,098157581 | -0,092879605 | 0 | N.A. | 0 |
| C2-AS1      | -0,098170104 |              | 0 | N.A. | 0 |
| CALCA       | -0,098170563 | -0,142340488 | 0 | N.A. | 0 |
| APOA1       | -0,098219573 | 0,021297925  | 0 | N.A. | 0 |
| HOMER1      | -0,098256713 | 0,170081594  | 0 | N.A. | 0 |
| CYP39A1     | -0,098285979 | -0,105421393 | 0 | N.A. | 0 |
| CYP27B1     | -0,098301699 | -0,159723997 | 0 | N.A. | 0 |
| AF127577.8  | -0,098314839 | 0,362920869  | 0 | N.A. | 0 |
| STARD13     | -0,098361025 | -0,030485703 | 0 | N.A. | 0 |
| ENKD1       | -0,098380795 | -0,27010261  | 0 | N.A. | 0 |
| CH25H       | -0,098401954 |              | 0 | N.A. | 0 |
| IDI1        | -0,098449706 | -0,011546476 | 0 | N.A. | 0 |
| ZGRF1       | -0,09849706  | -0,001527404 | 0 | N.A. | 0 |
| BCKDK       | -0,098577346 | 0,245768984  | 0 | N.A. | 0 |
| RP6-74O6.6  | -0,098635878 | 0,293145725  | 0 | N.A. | 0 |
| FREM2       | -0,098772576 | -0,168869207 | 0 | N.A. | 0 |
| KANSL2      | -0,098794902 | -0,093158452 | 0 | N.A. | 0 |
| LRRC73      | -0,098815124 | -0,011940884 | 0 | N.A. | 0 |
| LRIG1       | -0,098953464 | -0,057933647 | 0 | N.A. | 0 |
| RP11-595B24 | -0,098993183 | -0,302301509 | 0 | N.A. | 0 |
| GPR89B      | -0,0990201   | 0,02297035   | 0 | N.A. | 0 |
| AKAP8       | -0,099038569 | 0,058270691  | 0 | N.A. | 0 |
| SFSWAP      | -0,099088657 | 0,151419374  | 0 | N.A. | 0 |
| EID2        | -0,099100738 | -0,085146158 | 0 | N.A. | 0 |
| AP4M1       | -0,099136144 | 0,169209603  | 0 | N.A. | 0 |
| WDSUB1      | -0,099136448 | 0,02437838   | 0 | N.A. | 0 |
| SOCS2       | -0,099146037 | 0,102743202  | 0 | N.A. | 0 |
| DND1        | -0,099183699 | -0,112180923 | 0 | N.A. | 0 |
| RP11-307C12 | -0,099192138 | -0,023782458 | 0 | N.A. | 0 |
| ZNF419      | -0,099281266 | 0,278466209  | 0 | N.A. | 0 |
| DOLK        | -0,099290929 | 0,062013596  | 0 | N.A. | 0 |
| AC005614.3  | -0,099298411 |              | 0 | N.A. | 0 |
| FCRL3       | -0,099339186 | -0,057605904 | 0 | N.A. | 0 |

|             |              |              |   |      |   |
|-------------|--------------|--------------|---|------|---|
| S100A9      | -0,099368376 | -0,25558352  | 0 | N.A. | 0 |
| PCTP        | -0,099413501 | -0,117367523 | 0 | N.A. | 0 |
| DIEXF       | -0,099429942 | 0,025995275  | 0 | N.A. | 0 |
| SCYL1       | -0,099440107 | -0,03540769  | 0 | N.A. | 0 |
| FAM207A     | -0,099536748 | -0,140961133 | 0 | N.A. | 0 |
| SLC25A47    | -0,099611297 | 0,082703476  | 0 | N.A. | 0 |
| ENO4        | -0,099659819 | -0,113707677 | 0 | N.A. | 0 |
| PTK7        | -0,099661634 | -0,378691547 | 0 | N.A. | 0 |
| LINC00896   | -0,09972482  | 0,07845501   | 0 | N.A. | 0 |
| THAP3       | -0,09974764  | -0,274227383 | 0 | N.A. | 0 |
| RP11-73K9.3 | -0,099798147 | 0,180261303  | 0 | N.A. | 0 |
| ELK1        | -0,099805746 | -0,28514731  | 0 | N.A. | 0 |
| FAM57A      | -0,0998464   | -0,143928931 | 0 | N.A. | 0 |
| RP11-326K13 | -0,099858466 | -0,289934344 | 0 | N.A. | 0 |
| GNG8        | -0,099894251 |              | 0 | N.A. | 0 |
| TIAM1       | -0,099911574 | 0,075724846  | 0 | N.A. | 0 |
| RP11-151A6. | -0,099921761 |              | 0 | N.A. | 0 |
| ADH1C       | -0,099924957 | -0,288581169 | 0 | N.A. | 0 |
| EP400NL     | -0,099948965 | 0,032478919  | 0 | N.A. | 0 |
| C14orf79    | -0,099964341 | -0,116306062 | 0 | N.A. | 0 |
| RP11-260M1  | -0,099991401 | -0,347408515 | 0 | N.A. | 0 |
| C7orf26     | -0,10003992  | 0,237039135  | 0 | N.A. | 0 |
| ZNF197      | -0,100048307 | 0,100816254  | 0 | N.A. | 0 |
| C18orf21    | -0,100048523 | -0,042027077 | 0 | N.A. | 0 |
| COL9A1      | -0,10007544  |              | 0 | N.A. | 0 |
| CD79B       | -0,100150246 | 0,075560032  | 0 | N.A. | 0 |
| C3orf38     | -0,100155865 | -0,25120054  | 0 | N.A. | 0 |
| RP11-120K19 | -0,100157277 | 0,046965638  | 0 | N.A. | 0 |
| TH          | -0,100164261 | -0,150115642 | 0 | N.A. | 0 |
| URB1        | -0,100167969 | -0,012053478 | 0 | N.A. | 0 |
| AGAP2-AS1   | -0,100221402 | 0,089739214  | 0 | N.A. | 0 |
| ZNF213-AS1  | -0,100242662 | -0,080197573 | 0 | N.A. | 0 |
| ANKEF1      | -0,100260511 | -0,325058317 | 0 | N.A. | 0 |

|             |              |              |   |      |   |
|-------------|--------------|--------------|---|------|---|
| NRXN3       | -0,100262828 | -0,238138368 | 0 | N.A. | 0 |
| PGBD1       | -0,100267357 | -0,304506918 | 0 | N.A. | 0 |
| P4HB        | -0,10028723  | 0,504162775  | 0 | N.A. | 0 |
| CCND3       | -0,100349824 | -0,023366645 | 0 | N.A. | 0 |
| HTRA3       | -0,100449223 | -0,058634599 | 0 | N.A. | 0 |
| ZNF740      | -0,100450337 | 0,011831972  | 0 | N.A. | 0 |
| C19orf81    | -0,100482763 | -0,135572822 | 0 | N.A. | 0 |
| FZD3        | -0,100511365 | -0,201721752 | 0 | N.A. | 0 |
| TXNDC15     | -0,10053638  | -0,157271767 | 0 | N.A. | 0 |
| RP11-804A23 | -0,100552827 |              | 0 | N.A. | 0 |
| GID8        | -0,100571961 | -0,012474522 | 0 | N.A. | 0 |
| MSH3        | -0,100652135 | -0,072998514 | 0 | N.A. | 0 |
| KCNA7       | -0,100704491 | 0,006410315  | 0 | N.A. | 0 |
| EIF1B       | -0,100728726 | 0,019379856  | 0 | N.A. | 0 |
| TFCP2       | -0,100750155 | 0,192514343  | 0 | N.A. | 0 |
| IGHGP       | -0,100767092 | 0,006845336  | 0 | N.A. | 0 |
| WHSC1L1     | -0,100809129 | 0,220275084  | 0 | N.A. | 0 |
| FUT10       | -0,100900151 | -0,235866458 | 0 | N.A. | 0 |
| MLYCD       | -0,100984434 | 0,364788087  | 0 | N.A. | 0 |
| FPR2        | -0,101010532 | 0,206731428  | 0 | N.A. | 0 |
| NETO2       | -0,101021593 | -0,138997897 | 0 | N.A. | 0 |
| ARRDC3-AS1  | -0,101026639 | -0,133601317 | 0 | N.A. | 0 |
| STK19       | -0,101064009 | 0,22247413   | 0 | N.A. | 0 |
| CYTIP       | -0,101092657 | -0,279127701 | 0 | N.A. | 0 |
| C11orf57    | -0,101139156 | -0,197775635 | 0 | N.A. | 0 |
| IFITM2      | -0,101159685 | -0,255035883 | 0 | N.A. | 0 |
| CTBP2       | -0,101240689 | 0,142711796  | 0 | N.A. | 0 |
| LINC01301   | -0,101247026 | -0,097082921 | 0 | N.A. | 0 |
| SERPINA10   | -0,101258989 | 0,109954994  | 0 | N.A. | 0 |
| LINC01273   | -0,101285436 | -0,141587924 | 0 | N.A. | 0 |
| RP11-707G18 | -0,101304651 | 0,046358276  | 0 | N.A. | 0 |
| MGA         | -0,101337312 | 0,009342067  | 0 | N.A. | 0 |
| RNF114      | -0,101404048 | 0,080428604  | 0 | N.A. | 0 |

|             |              |              |   |      |   |
|-------------|--------------|--------------|---|------|---|
| SMIM13      | -0,101415949 | -0,291589323 | 0 | N.A. | 0 |
| ZNF626      | -0,101442697 | -0,238373313 | 0 | N.A. | 0 |
| MARC2       | -0,10149251  | 0,141705476  | 0 | N.A. | 0 |
| RP11-7F17.8 | -0,101503378 | -0,005148025 | 0 | N.A. | 0 |
| BCKDHB      | -0,101571412 | -0,32531394  | 0 | N.A. | 0 |
| PTPRC       | -0,101580947 | -0,120542329 | 0 | N.A. | 0 |
| RP11-167B3. | -0,101614992 |              | 0 | N.A. | 0 |
| CTD-237701  | -0,101618417 |              | 0 | N.A. | 0 |
| IGKV3-11    | -0,101629772 | 0,123795494  | 0 | N.A. | 0 |
| TYRP1       | -0,101656018 | -0,011009798 | 0 | N.A. | 0 |
| BEST3       | -0,101679825 | 0,29072189   | 0 | N.A. | 0 |
| BAZ1A       | -0,101688134 | 0,018262801  | 0 | N.A. | 0 |
| RP11-505K9. | -0,101693715 | -0,118510105 | 0 | N.A. | 0 |
| SLU7        | -0,101734899 | 0,099898394  | 0 | N.A. | 0 |
| RP11-643M1  | -0,101776044 | -0,079646101 | 0 | N.A. | 0 |
| RP11-141M1  | -0,101861794 |              | 0 | N.A. | 0 |
| NAALADL1    | -0,101884974 | -0,063791137 | 0 | N.A. | 0 |
| UBE2QL1     | -0,101920281 |              | 0 | N.A. | 0 |
| NAGPA       | -0,101933672 | 0,027547968  | 0 | N.A. | 0 |
| RAP1GAP     | -0,10211207  | -0,053426218 | 0 | N.A. | 0 |
| RP11-89M20  | -0,102120913 | -0,002060108 | 0 | N.A. | 0 |
| PDE1A       | -0,10214535  |              | 0 | N.A. | 0 |
| LMLN        | -0,102235799 | 0,151129371  | 0 | N.A. | 0 |
| SIX2        | -0,102254118 |              | 0 | N.A. | 0 |
| RP11-126K1. | -0,102291864 |              | 0 | N.A. | 0 |
| SIRT3       | -0,102318306 | -0,202007682 | 0 | N.A. | 0 |
| KL          | -0,102374113 |              | 0 | N.A. | 0 |
| WDR25       | -0,102390637 | -0,149872785 | 0 | N.A. | 0 |
| RP11-412D9. | -0,102398608 |              | 0 | N.A. | 0 |
| TMEM256-PI  | -0,102400817 | 0,25432021   | 0 | N.A. | 0 |
| RP11-600F24 | -0,102437401 | 0,080089931  | 0 | N.A. | 0 |
| SVOP        | -0,102453882 |              | 0 | N.A. | 0 |
| CCL17       | -0,102479765 |              | 0 | N.A. | 0 |

|             |              |              |   |      |   |
|-------------|--------------|--------------|---|------|---|
| IDE         | -0,102513387 | -0,12681979  | 0 | N.A. | 0 |
| SMAD5       | -0,102626694 | 0,115604142  | 0 | N.A. | 0 |
| LINC00570   | -0,1026357   | -0,000951186 | 0 | N.A. | 0 |
| CTD-3064M3  | -0,102681307 | -0,057449403 | 0 | N.A. | 0 |
| DGKZ        | -0,102685593 | 0,175433396  | 0 | N.A. | 0 |
| PRPF39      | -0,102795678 | -0,026363459 | 0 | N.A. | 0 |
| HBA2        | -0,102820944 | -0,079255454 | 0 | N.A. | 0 |
| NEUROG3     | -0,102829081 | 0,161012613  | 0 | N.A. | 0 |
| AC012507.3  | -0,10283616  | 0,191692544  | 0 | N.A. | 0 |
| MFSD6L      | -0,10287309  | 0,087552076  | 0 | N.A. | 0 |
| GPR56       | -0,102915861 | 0,239790363  | 0 | N.A. | 0 |
| DIRAS3      | -0,102967212 | -0,004461398 | 0 | N.A. | 0 |
| DACT2       | -0,102979236 |              | 0 | N.A. | 0 |
| ZNRD1-AS1   | -0,102982625 | 0,004268879  | 0 | N.A. | 0 |
| RP11-1299A1 | -0,103001904 | -0,086027407 | 0 | N.A. | 0 |
| TEX29       | -0,103004816 | 0,004537914  | 0 | N.A. | 0 |
| SH3BGR      | -0,103067496 | 0,100240107  | 0 | N.A. | 0 |
| METTL21B    | -0,103074501 | -0,261160495 | 0 | N.A. | 0 |
| GFOD2       | -0,103084514 | -0,076496513 | 0 | N.A. | 0 |
| CTR9        | -0,103117572 | 0,082957325  | 0 | N.A. | 0 |
| SMDT1       | -0,103152178 | -0,266717636 | 0 | N.A. | 0 |
| ZFP1        | -0,10317397  | -0,044370474 | 0 | N.A. | 0 |
| FLJ37035    | -0,103290832 | -0,136031016 | 0 | N.A. | 0 |
| PIGC        | -0,103314577 | 0,331706541  | 0 | N.A. | 0 |
| RP1-159A19. | -0,103369893 | -0,233481515 | 0 | N.A. | 0 |
| GATA4       | -0,103381297 | -0,014398417 | 0 | N.A. | 0 |
| ENTPD1-AS1  | -0,10338361  | -0,14033927  | 0 | N.A. | 0 |
| DDX42       | -0,103409364 | 0,381091892  | 0 | N.A. | 0 |
| ZNF420      | -0,10341656  | -0,098261093 | 0 | N.A. | 0 |
| CCDC102A    | -0,103435949 | -0,126602754 | 0 | N.A. | 0 |
| DLX3        | -0,103500514 | -0,12174515  | 0 | N.A. | 0 |
| OTUD6B-AS1  | -0,103528151 | -0,129981641 | 0 | N.A. | 0 |
| AC144450.2  | -0,103578642 | 0,014074104  | 0 | N.A. | 0 |

|             |              |              |   |      |   |
|-------------|--------------|--------------|---|------|---|
| METTL14     | -0,10359952  | 0,034307295  | 0 | N.A. | 0 |
| PDZRN3      | -0,103601417 | 0,292083455  | 0 | N.A. | 0 |
| MACROD2     | -0,103625164 | 0,071724158  | 0 | N.A. | 0 |
| LDLRAD3     | -0,103697343 | 0,008469085  | 0 | N.A. | 0 |
| ZFAND4      | -0,103736174 | 0,075308812  | 0 | N.A. | 0 |
| PTGES3L     | -0,10377222  | 0,089049782  | 0 | N.A. | 0 |
| EMID1       | -0,103879242 |              | 0 | N.A. | 0 |
| ACSL4       | -0,1039042   | -0,158099399 | 0 | N.A. | 0 |
| KLHL7       | -0,104014461 | 0,002496369  | 0 | N.A. | 0 |
| CTTNBP2     | -0,104059448 | -0,207662906 | 0 | N.A. | 0 |
| VRK2        | -0,104060589 | 0,008389391  | 0 | N.A. | 0 |
| RP11-610P16 | -0,104068666 | 0,127507841  | 0 | N.A. | 0 |
| CWF19L2     | -0,104106739 | 0,112108056  | 0 | N.A. | 0 |
| SLC38A6     | -0,104180158 | 0,129111566  | 0 | N.A. | 0 |
| BCL6B       | -0,104204052 |              | 0 | N.A. | 0 |
| VPS33A      | -0,104220424 | -0,315176595 | 0 | N.A. | 0 |
| SMARCAL1    | -0,104235681 | -0,164907709 | 0 | N.A. | 0 |
| KLHDC9      | -0,104260503 | -0,233139984 | 0 | N.A. | 0 |
| XAB2        | -0,104313614 | 0,019026597  | 0 | N.A. | 0 |
| CTA-363E6.6 | -0,104346404 | -0,061070442 | 0 | N.A. | 0 |
| BCKDHA      | -0,104375596 | -0,137450365 | 0 | N.A. | 0 |
| RP11-394I13 | -0,104386931 | 0,055759948  | 0 | N.A. | 0 |
| LAMP1       | -0,104406823 | 0,420677615  | 0 | N.A. | 0 |
| ATOH8       | -0,104489813 | 0,210030113  | 0 | N.A. | 0 |
| AUP1        | -0,104493481 | 0,281423833  | 0 | N.A. | 0 |
| SPATA5      | -0,104539275 | 0,071630738  | 0 | N.A. | 0 |
| RBP7        | -0,104544454 | -0,075832205 | 0 | N.A. | 0 |
| RP4-613A2.1 | -0,1045598   | 0,159364284  | 0 | N.A. | 0 |
| HNF1A       | -0,104573266 | -0,17862486  | 0 | N.A. | 0 |
| HOXB6       | -0,104618695 | 0,553463278  | 0 | N.A. | 0 |
| FGD5-AS1    | -0,10462558  | 0,053044615  | 0 | N.A. | 0 |
| ZNF891      | -0,104642603 | 0,035149634  | 0 | N.A. | 0 |
| AC006547.14 | -0,104665012 |              | 0 | N.A. | 0 |

|              |              |              |   |      |   |
|--------------|--------------|--------------|---|------|---|
| NQO2         | -0,104692627 | -0,049455517 | 0 | N.A. | 0 |
| IGHV3-21     | -0,10471682  | -0,22982107  | 0 | N.A. | 0 |
| SMAD6        | -0,104735214 | -0,0908964   | 0 | N.A. | 0 |
| RP11-295H24  | -0,104738202 | -0,063061895 | 0 | N.A. | 0 |
| RP11-399K21  | -0,104750521 | 0,200574126  | 0 | N.A. | 0 |
| CNDP1        | -0,104880469 | -0,257034054 | 0 | N.A. | 0 |
| AC002454.1   | -0,104910074 |              | 0 | N.A. | 0 |
| IGLV2-23     | -0,104929478 | -0,010615561 | 0 | N.A. | 0 |
| TRMT12       | -0,104929754 | -0,014906814 | 0 | N.A. | 0 |
| WIPF1        | -0,105096616 | -0,165690673 | 0 | N.A. | 0 |
| NAT9         | -0,105106197 | -0,076730304 | 0 | N.A. | 0 |
| ADAMTS14     | -0,105111043 | 0,122100689  | 0 | N.A. | 0 |
| RP11-318E3.  | -0,10513481  | 0,153620059  | 0 | N.A. | 0 |
| C8orf37      | -0,105167325 | 0,056628728  | 0 | N.A. | 0 |
| ACOT4        | -0,105215556 | -0,22789281  | 0 | N.A. | 0 |
| DSCAML1      | -0,105227627 | -0,10941462  | 0 | N.A. | 0 |
| HEATR6       | -0,105259755 | 0,087919587  | 0 | N.A. | 0 |
| RP3-496C20.  | -0,105279692 | -0,048458403 | 0 | N.A. | 0 |
| CCDC40       | -0,105329463 | -0,047012716 | 0 | N.A. | 0 |
| SPTY2D1-AS1  | -0,105342334 | -0,286409127 | 0 | N.A. | 0 |
| EIF2S3L      | -0,105367772 | -0,109371915 | 0 | N.A. | 0 |
| IGLV3-9      | -0,105414192 | -0,225163244 | 0 | N.A. | 0 |
| RP11-1060J1  | -0,105449156 | 0,038617062  | 0 | N.A. | 0 |
| MARCH9       | -0,105599435 | 0,238026417  | 0 | N.A. | 0 |
| RP11-770J1.3 | -0,10567813  | -0,273272437 | 0 | N.A. | 0 |
| CTC-523E23.  | -0,105688262 |              | 0 | N.A. | 0 |
| HTR1F        | -0,105691726 |              | 0 | N.A. | 0 |
| APOL4        | -0,10572908  | -0,27043428  | 0 | N.A. | 0 |
| NUPR1        | -0,105751466 | -0,158948836 | 0 | N.A. | 0 |
| ZNF107       | -0,105873922 | -0,067471439 | 0 | N.A. | 0 |
| CDK7         | -0,105955696 | -0,117552708 | 0 | N.A. | 0 |
| IDH1-AS1     | -0,106003562 | -0,313956692 | 0 | N.A. | 0 |
| ENHO         | -0,106038815 |              | 0 | N.A. | 0 |



|             |              |              |   |      |   |
|-------------|--------------|--------------|---|------|---|
| NAA25       | -0,106047147 | 0,087142541  | 0 | N.A. | 0 |
| CPOX        | -0,106052091 | 0,178460568  | 0 | N.A. | 0 |
| CTD-2006K23 | -0,106056648 |              | 0 | N.A. | 0 |
| ARGLU1      | -0,106081597 | 0,316991036  | 0 | N.A. | 0 |
| ZNRF3       | -0,106101363 | -0,055489145 | 0 | N.A. | 0 |
| PCDH8       | -0,106109673 |              | 0 | N.A. | 0 |
| C5orf38     | -0,106120734 | 0,011075135  | 0 | N.A. | 0 |
| RPPH1       | -0,106145862 | 0,156187504  | 0 | N.A. | 0 |
| ZBTB3       | -0,106163699 | 0,013506531  | 0 | N.A. | 0 |
| CXorf57     | -0,1063147   | -0,102242785 | 0 | N.A. | 0 |
| RP11-109D9. | -0,106531911 |              | 0 | N.A. | 0 |
| C8orf44     | -0,106562402 | 0,085142113  | 0 | N.A. | 0 |
| LPHN1       | -0,106728961 | 0,27418562   | 0 | N.A. | 0 |
| NEURL1      | -0,106799582 | -0,058934997 | 0 | N.A. | 0 |
| PCSK1       | -0,106807878 | -0,145162845 | 0 | N.A. | 0 |
| CLEC11A     | -0,106835224 | -0,202142424 | 0 | N.A. | 0 |
| NOP10       | -0,106903827 | -0,152679161 | 0 | N.A. | 0 |
| NUCB1       | -0,106905402 | -0,082672471 | 0 | N.A. | 0 |
| PRUNE       | -0,106959114 | -0,010046027 | 0 | N.A. | 0 |
| LRRC2       | -0,106975088 | -0,210263912 | 0 | N.A. | 0 |
| MB21D1      | -0,107011134 | -0,175177261 | 0 | N.A. | 0 |
| CLDN10      | -0,107024191 |              | 0 | N.A. | 0 |
| CEP164      | -0,107056473 | 0,153024242  | 0 | N.A. | 0 |
| CHL1        | -0,107131507 | -0,261509598 | 0 | N.A. | 0 |
| ST7         | -0,107149985 | -0,305114772 | 0 | N.A. | 0 |
| ALDH5A1     | -0,107150592 | -0,178649279 | 0 | N.A. | 0 |
| PIGBOS1     | -0,107153788 | -0,230491707 | 0 | N.A. | 0 |
| KCNJ11      | -0,107163035 | -0,157411152 | 0 | N.A. | 0 |
| RP11-326I11 | -0,107179106 | 0,249854086  | 0 | N.A. | 0 |
| KLHL32      | -0,10720533  | -0,134179101 | 0 | N.A. | 0 |
| FBXO15      | -0,107271005 | -0,034291472 | 0 | N.A. | 0 |
| KIRREL3     | -0,107294358 | -0,105869318 | 0 | N.A. | 0 |
| FAM175B     | -0,107390869 | 0,091923901  | 0 | N.A. | 0 |

|              |              |              |   |      |   |
|--------------|--------------|--------------|---|------|---|
| ACTG1        | -0,107458172 | -0,109889457 | 0 | N.A. | 0 |
| ANK2         | -0,107725027 | 0,109422504  | 0 | N.A. | 0 |
| REM2         | -0,107796012 | 0,082293678  | 0 | N.A. | 0 |
| ATG10        | -0,107862714 | -0,130804654 | 0 | N.A. | 0 |
| RP4-753F5.1  | -0,107864344 | -0,032580665 | 0 | N.A. | 0 |
| ZNF391       | -0,107962896 | -0,322543549 | 0 | N.A. | 0 |
| RP11-30L15.6 | -0,108194546 |              | 0 | N.A. | 0 |
| CYBA         | -0,108223047 | 0,049032427  | 0 | N.A. | 0 |
| FBLN1        | -0,108272173 | 0,073349198  | 0 | N.A. | 0 |
| DDTL         | -0,108319111 | -0,126155523 | 0 | N.A. | 0 |
| TEAD2        | -0,108319254 | -0,334679431 | 0 | N.A. | 0 |
| ARHGAP9      | -0,108411913 | -0,221607244 | 0 | N.A. | 0 |
| IFT74-AS1    | -0,108432202 | 0,012410485  | 0 | N.A. | 0 |
| ENTHD2       | -0,108446454 | 0,114765219  | 0 | N.A. | 0 |
| NUP153       | -0,108486734 | 0,163077924  | 0 | N.A. | 0 |
| THEG         | -0,108494276 |              | 0 | N.A. | 0 |
| PPFIBP2      | -0,108537025 | -0,048376125 | 0 | N.A. | 0 |
| LOXL1        | -0,108552726 | -0,245661826 | 0 | N.A. | 0 |
| TMEM220-AS1  | -0,108552808 | -0,297882311 | 0 | N.A. | 0 |
| CEPT1        | -0,108608591 | 0,081036051  | 0 | N.A. | 0 |
| GDPD1        | -0,10861582  | 0,169694306  | 0 | N.A. | 0 |
| SLC2A4       | -0,108619478 | -0,142932716 | 0 | N.A. | 0 |
| DNAJB5       | -0,108662845 | -0,073931139 | 0 | N.A. | 0 |
| C8orf44-SGK  | -0,108688201 | -0,050984075 | 0 | N.A. | 0 |
| DACH1        | -0,108704563 | -0,112822557 | 0 | N.A. | 0 |
| OSCP1        | -0,108756325 | 0,056037221  | 0 | N.A. | 0 |
| ZFP69        | -0,108756892 | -0,12594194  | 0 | N.A. | 0 |
| RP11-517B1.1 | -0,108761231 |              | 0 | N.A. | 0 |
| SMOC1        | -0,108808929 | 0,315499611  | 0 | N.A. | 0 |
| ZNF473       | -0,108850487 | -0,057694967 | 0 | N.A. | 0 |
| RP11-343J3.2 | -0,108876046 |              | 0 | N.A. | 0 |
| ARID4A       | -0,10888691  | 0,22134394   | 0 | N.A. | 0 |
| TMEM80       | -0,108990492 | -0,220996899 | 0 | N.A. | 0 |

|              |              |              |   |      |   |
|--------------|--------------|--------------|---|------|---|
| WNT3         | -0,109006305 | -0,049935548 | 0 | N.A. | 0 |
| FBF1         | -0,109048863 | -0,06054638  | 0 | N.A. | 0 |
| CEP19        | -0,109052792 | -0,308529427 | 0 | N.A. | 0 |
| AGBL4        | -0,109066696 | 0,140080386  | 0 | N.A. | 0 |
| RP11-462G2.  | -0,109113093 | 0,052859364  | 0 | N.A. | 0 |
| TSSC4        | -0,109160003 | 0,053607769  | 0 | N.A. | 0 |
| PTBP2        | -0,109160419 | -0,156319925 | 0 | N.A. | 0 |
| ERICH5       | -0,109161169 | -0,008448679 | 0 | N.A. | 0 |
| AEBP2        | -0,109166303 | 0,089029615  | 0 | N.A. | 0 |
| RP11-220I1.5 | -0,109172365 | -0,077020045 | 0 | N.A. | 0 |
| PRICKLE3     | -0,109179427 | -0,177493714 | 0 | N.A. | 0 |
| IER2         | -0,109300501 | 0,289497968  | 0 | N.A. | 0 |
| PRR9         | -0,109321568 |              | 0 | N.A. | 0 |
| SLC52A2      | -0,109402772 | 0,437838145  | 0 | N.A. | 0 |
| SYF2         | -0,109448489 | 0,072773888  | 0 | N.A. | 0 |
| AC053503.4   | -0,109461223 | 0,238888793  | 0 | N.A. | 0 |
| FOCAD-AS1    | -0,109461431 | -0,246292209 | 0 | N.A. | 0 |
| CTD-2240J17  | -0,109467868 | -0,125461221 | 0 | N.A. | 0 |
| FLJ37453     | -0,10951954  | 0,084642919  | 0 | N.A. | 0 |
| MTA3         | -0,109607209 | 0,200550066  | 0 | N.A. | 0 |
| ARMCX1       | -0,109609494 | 0,284196837  | 0 | N.A. | 0 |
| IRF2BP1      | -0,109614244 | -0,055021841 | 0 | N.A. | 0 |
| RP11-134G8.  | -0,109623639 | -0,252360046 | 0 | N.A. | 0 |
| LINC00853    | -0,10963684  | -0,064628577 | 0 | N.A. | 0 |
| GTPBP10      | -0,109693127 | 0,079023949  | 0 | N.A. | 0 |
| JPH1         | -0,109833587 | -0,098243851 | 0 | N.A. | 0 |
| PANO1        | -0,109837306 | 0,133124872  | 0 | N.A. | 0 |
| AGL          | -0,109879535 | 0,130813627  | 0 | N.A. | 0 |
| GTF3C4       | -0,109955944 | -0,107153282 | 0 | N.A. | 0 |
| ACO2         | -0,11003348  | 0,162477202  | 0 | N.A. | 0 |
| SLC27A4      | -0,110042166 | 0,332263237  | 0 | N.A. | 0 |
| GEMIN4       | -0,110082969 | 0,09755786   | 0 | N.A. | 0 |
| CDADC1       | -0,110106649 | -0,098497669 | 0 | N.A. | 0 |

|             |              |              |   |      |   |
|-------------|--------------|--------------|---|------|---|
| DENND1C     | -0,110110691 | -0,182877612 | 0 | N.A. | 0 |
| RP11-651L5. | -0,110116534 | -0,036748019 | 0 | N.A. | 0 |
| CA5A        | -0,110130242 | 0,02521042   | 0 | N.A. | 0 |
| RGS1        | -0,110152042 | -0,216940953 | 0 | N.A. | 0 |
| ZNF141      | -0,110154244 | -0,104273857 | 0 | N.A. | 0 |
| RP11-93B14. | -0,110163    | -0,039315617 | 0 | N.A. | 0 |
| UBE2M       | -0,110165235 | 0,236261261  | 0 | N.A. | 0 |
| RP11-401P9. | -0,110173645 | 0,005232605  | 0 | N.A. | 0 |
| AC022182.1  | -0,110206131 | -0,234758617 | 0 | N.A. | 0 |
| PCDHA10     | -0,110214184 |              | 0 | N.A. | 0 |
| DUSP28      | -0,110234086 | 0,022569078  | 0 | N.A. | 0 |
| AC009403.2  | -0,110347326 | -0,424231886 | 0 | N.A. | 0 |
| MAP6D1      | -0,110383236 | -0,120105156 | 0 | N.A. | 0 |
| SATB2-AS1   | -0,110436762 | -0,096037228 | 0 | N.A. | 0 |
| LAMTOR5     | -0,110451537 | 0,082537631  | 0 | N.A. | 0 |
| GLIPR2      | -0,110502418 | -0,362750899 | 0 | N.A. | 0 |
| RP13-131K19 | -0,110509174 | 0,253107376  | 0 | N.A. | 0 |
| ZNF37A      | -0,110547797 | 0,0981182    | 0 | N.A. | 0 |
| RP3-323P24. | -0,110560935 | -0,08856288  | 0 | N.A. | 0 |
| RASSF1      | -0,110587121 | -0,346018252 | 0 | N.A. | 0 |
| TMLHE       | -0,1106978   | -0,484268643 | 0 | N.A. | 0 |
| EFEMP1      | -0,11071842  | 0,243981052  | 0 | N.A. | 0 |
| IKBKAP      | -0,110745811 | -0,097750054 | 0 | N.A. | 0 |
| RP11-390E23 | -0,110755852 | -0,127106197 | 0 | N.A. | 0 |
| RP11-451G4. | -0,110764231 | 0,311745518  | 0 | N.A. | 0 |
| C11orf30    | -0,110772224 | 0,067228005  | 0 | N.A. | 0 |
| ST6GALNAC1  | -0,110849344 | -0,090739901 | 0 | N.A. | 0 |
| ENAH        | -0,110856415 | -0,092631234 | 0 | N.A. | 0 |
| LINC01126   | -0,110884504 | 0,053416652  | 0 | N.A. | 0 |
| SEP15       | -0,110940069 | 0,147570083  | 0 | N.A. | 0 |
| PLA2G4D     | -0,110953674 | 0,144779829  | 0 | N.A. | 0 |
| LRRIQ3      | -0,110966403 | -0,373767387 | 0 | N.A. | 0 |
| ZNF662      | -0,111027037 | 0,116138296  | 0 | N.A. | 0 |

|             |              |              |   |      |   |
|-------------|--------------|--------------|---|------|---|
| NME3        | -0,111081684 | 0,38181588   | 0 | N.A. | 0 |
| CHD6        | -0,111118311 | 0,045350091  | 0 | N.A. | 0 |
| ZFP30       | -0,111231401 | -0,100726691 | 0 | N.A. | 0 |
| ATOH7       | -0,111251358 | -0,003609781 | 0 | N.A. | 0 |
| RP11-162A12 | -0,111256187 |              | 0 | N.A. | 0 |
| OAZ1        | -0,11157278  | -0,03743802  | 0 | N.A. | 0 |
| LLOXNC01-7P | -0,111619773 | 0,101495955  | 0 | N.A. | 0 |
| ZNF45       | -0,111640435 | -0,12462053  | 0 | N.A. | 0 |
| CCDC117     | -0,111672984 | -0,010140459 | 0 | N.A. | 0 |
| TBP         | -0,111707561 | 0,04693403   | 0 | N.A. | 0 |
| RP11-332J15 | -0,111712188 |              | 0 | N.A. | 0 |
| GCLM        | -0,111738482 | -0,265372973 | 0 | N.A. | 0 |
| TCTN3       | -0,11174299  | -0,046589237 | 0 | N.A. | 0 |
| CNOT6       | -0,111774965 | -0,226543121 | 0 | N.A. | 0 |
| C12orf5     | -0,111853215 | -0,162107997 | 0 | N.A. | 0 |
| ZNF491      | -0,11195204  | -0,080106893 | 0 | N.A. | 0 |
| TARS        | -0,11197219  | 0,240885643  | 0 | N.A. | 0 |
| TRDC        | -0,111996837 |              | 0 | N.A. | 0 |
| CACNA1H     | -0,112006417 | 0,174007787  | 0 | N.A. | 0 |
| AKAP14      | -0,112069517 | -0,270585702 | 0 | N.A. | 0 |
| FHDC1       | -0,112109276 | 0,143792     | 0 | N.A. | 0 |
| AC007773.2  | -0,112176191 | -0,015340367 | 0 | N.A. | 0 |
| ZNF668      | -0,112201221 | -0,277081791 | 0 | N.A. | 0 |
| RP11-996F15 | -0,112404991 | 0,196171612  | 0 | N.A. | 0 |
| RGS14       | -0,112432338 | -0,042472291 | 0 | N.A. | 0 |
| RAB42       | -0,112452173 | 0,156087843  | 0 | N.A. | 0 |
| RP11-645C24 | -0,112471412 |              | 0 | N.A. | 0 |
| PTPRN       | -0,112471415 | -0,065828982 | 0 | N.A. | 0 |
| RP11-1109F1 | -0,11254889  |              | 0 | N.A. | 0 |
| PTPRN2      | -0,112630288 | 0,147744732  | 0 | N.A. | 0 |
| ZNF280B     | -0,112638826 | -0,179859287 | 0 | N.A. | 0 |
| RP11-262H14 | -0,112641612 | -0,368168617 | 0 | N.A. | 0 |
| FOXN3-AS1   | -0,112690759 | 0,044668025  | 0 | N.A. | 0 |

|             |              |              |   |      |   |
|-------------|--------------|--------------|---|------|---|
| SLC10A5     | -0,112713812 | -0,06793121  | 0 | N.A. | 0 |
| IGHD        | -0,112727692 | -0,238373313 | 0 | N.A. | 0 |
| EXOSC6      | -0,112764212 | 0,108063033  | 0 | N.A. | 0 |
| MARS        | -0,112824564 | 0,228257854  | 0 | N.A. | 0 |
| USP27X-AS1  | -0,112885383 | -0,137027608 | 0 | N.A. | 0 |
| WTAP        | -0,112897065 | -0,026770097 | 0 | N.A. | 0 |
| CDK6        | -0,112991916 | -0,041002462 | 0 | N.A. | 0 |
| AC005523.3  | -0,113049171 | 0,166370016  | 0 | N.A. | 0 |
| RP11-697E2. | -0,11310505  | 0,027602856  | 0 | N.A. | 0 |
| TEX101      | -0,113106823 | 0,026283336  | 0 | N.A. | 0 |
| UBE2K       | -0,113198673 | -0,138355371 | 0 | N.A. | 0 |
| STAM-AS1    | -0,113229015 | 0,109955723  | 0 | N.A. | 0 |
| LINC01260   | -0,113257764 | 0,089350064  | 0 | N.A. | 0 |
| MCOLN3      | -0,113267815 | 0,019589737  | 0 | N.A. | 0 |
| DUSP19      | -0,113312542 | 0,096574261  | 0 | N.A. | 0 |
| RP11-242D8. | -0,113352404 | 0,028329898  | 0 | N.A. | 0 |
| CDH23       | -0,11340557  | -0,188708907 | 0 | N.A. | 0 |
| SYNGR4      | -0,113407346 | -0,338998546 | 0 | N.A. | 0 |
| SULT2A1     | -0,113436609 | -0,230806035 | 0 | N.A. | 0 |
| RP11-424N24 | -0,113446979 | 0,122441668  | 0 | N.A. | 0 |
| IL2         | -0,1134999   |              | 0 | N.A. | 0 |
| C11orf53    | -0,113603879 | -0,190270429 | 0 | N.A. | 0 |
| FAM72A      | -0,113690956 | -0,2095444   | 0 | N.A. | 0 |
| ATP5EP2     | -0,113779594 | -0,292403541 | 0 | N.A. | 0 |
| PPCDC       | -0,113785974 | -0,064276913 | 0 | N.A. | 0 |
| CD8B        | -0,113811146 | 0,065286158  | 0 | N.A. | 0 |
| FHL3        | -0,113871903 | -0,304204612 | 0 | N.A. | 0 |
| BPGM        | -0,113909388 | -0,131792207 | 0 | N.A. | 0 |
| ATP13A1     | -0,113926854 | 0,254842907  | 0 | N.A. | 0 |
| RASAL3      | -0,113933718 | -0,1195951   | 0 | N.A. | 0 |
| RP11-669N7. | -0,113937619 | -0,197452857 | 0 | N.A. | 0 |
| POLG2       | -0,113954121 | 0,000347476  | 0 | N.A. | 0 |
| RP11-513M1  | -0,113990309 | -0,184971372 | 0 | N.A. | 0 |

|             |              |              |   |      |   |
|-------------|--------------|--------------|---|------|---|
| SNCAIP      | -0,114037249 | -0,377956934 | 0 | N.A. | 0 |
| CD302       | -0,114058883 | -0,27470936  | 0 | N.A. | 0 |
| DBNL        | -0,114160039 | 0,153253405  | 0 | N.A. | 0 |
| ADNP        | -0,114231128 | 0,062981824  | 0 | N.A. | 0 |
| TBX10       | -0,11431913  | -0,149572202 | 0 | N.A. | 0 |
| FSD1        | -0,114396425 | 0,050160716  | 0 | N.A. | 0 |
| NAT2        | -0,114396805 | 0,158489531  | 0 | N.A. | 0 |
| ZCCHC12     | -0,114407843 |              | 0 | N.A. | 0 |
| AC142119.1  | -0,11446917  | -0,119725798 | 0 | N.A. | 0 |
| DCLK2       | -0,114470652 |              | 0 | N.A. | 0 |
| SFTA1P      | -0,114492982 | -0,063752043 | 0 | N.A. | 0 |
| CASC15      | -0,114529039 | 0,112950896  | 0 | N.A. | 0 |
| HIGD2A      | -0,114535404 | -0,386619348 | 0 | N.A. | 0 |
| NROB2       | -0,114575458 | 0,094683595  | 0 | N.A. | 0 |
| RP11-421M1  | -0,114624394 | -0,205659702 | 0 | N.A. | 0 |
| ATAT1       | -0,114652987 | -0,346642016 | 0 | N.A. | 0 |
| UBE2D4      | -0,114660585 | -0,18890042  | 0 | N.A. | 0 |
| KBTBD12     | -0,114685261 | 0,172851274  | 0 | N.A. | 0 |
| EXO5        | -0,114718163 | 0,169405082  | 0 | N.A. | 0 |
| LSM14B      | -0,114813335 | -0,161594946 | 0 | N.A. | 0 |
| YAF2        | -0,114866012 | -0,195161058 | 0 | N.A. | 0 |
| HOXD8       | -0,11490721  | 0,059358965  | 0 | N.A. | 0 |
| NT5M        | -0,114931331 | -0,107798453 | 0 | N.A. | 0 |
| SLC35C2     | -0,114972168 | 0,158037546  | 0 | N.A. | 0 |
| LINC00863   | -0,115001744 | 0,05421278   | 0 | N.A. | 0 |
| CKM         | -0,115023075 | 0,060742791  | 0 | N.A. | 0 |
| RP11-97C16. | -0,115023215 | -0,130900294 | 0 | N.A. | 0 |
| ZNF280C     | -0,115179611 | -0,092926337 | 0 | N.A. | 0 |
| ZCCHC7      | -0,115289591 | 0,011859579  | 0 | N.A. | 0 |
| RP4-563E14. | -0,115292742 | -0,043940074 | 0 | N.A. | 0 |
| TCEB3       | -0,115394862 | 0,182650523  | 0 | N.A. | 0 |
| OXNAD1      | -0,115542305 | -0,240095859 | 0 | N.A. | 0 |
| RP11-127B20 | -0,115612469 | -0,006251181 | 0 | N.A. | 0 |

|              |              |              |   |      |   |
|--------------|--------------|--------------|---|------|---|
| RP11-98I9.4  | -0,115676947 | -0,23338751  | 0 | N.A. | 0 |
| SLC8A1       | -0,115688745 | -0,273604502 | 0 | N.A. | 0 |
| AMH          | -0,115748846 | 0,103461051  | 0 | N.A. | 0 |
| NELFA        | -0,115841971 | -0,051302741 | 0 | N.A. | 0 |
| HOXA-AS3     | -0,115851736 | -0,026905873 | 0 | N.A. | 0 |
| KLF1         | -0,115913045 |              | 0 | N.A. | 0 |
| KCNK12       | -0,115928078 |              | 0 | N.A. | 0 |
| ANKRD30B     | -0,115971968 | 0,013922958  | 0 | N.A. | 0 |
| TNPO1        | -0,116024391 | 0,057025064  | 0 | N.A. | 0 |
| ACTA1        | -0,116040694 | 0,014341183  | 0 | N.A. | 0 |
| IZUMO2       | -0,116070475 | -0,349851694 | 0 | N.A. | 0 |
| SCAF11       | -0,116071991 | 0,265098941  | 0 | N.A. | 0 |
| RP11-265N6.  | -0,116076527 | 0,40978219   | 0 | N.A. | 0 |
| SLC27A3      | -0,116078258 | 0,25585006   | 0 | N.A. | 0 |
| ZNF214       | -0,116106619 | -0,271489728 | 0 | N.A. | 0 |
| STAMBP       | -0,116171559 | 0,219074088  | 0 | N.A. | 0 |
| FUCA2        | -0,116172479 | 0,14713647   | 0 | N.A. | 0 |
| BBS5         | -0,116197209 | 0,356975999  | 0 | N.A. | 0 |
| HMHA1        | -0,116197548 | 0,085499582  | 0 | N.A. | 0 |
| C2orf69      | -0,11625453  | -0,171607132 | 0 | N.A. | 0 |
| XXbac-B135H  | -0,116259566 | 0,007739107  | 0 | N.A. | 0 |
| ZMYND19      | -0,116284513 | -0,031817712 | 0 | N.A. | 0 |
| RP3-467K16.  | -0,116364575 |              | 0 | N.A. | 0 |
| CYP27A1      | -0,116372862 | -0,068072483 | 0 | N.A. | 0 |
| ACSM3        | -0,1163746   | -0,328382403 | 0 | N.A. | 0 |
| RP11-112J3.1 | -0,116382494 | -0,091638561 | 0 | N.A. | 0 |
| AC004231.2   | -0,116385016 | 0,202300158  | 0 | N.A. | 0 |
| BTK          | -0,116408219 | -0,106748793 | 0 | N.A. | 0 |
| SUOX         | -0,116416825 | -0,044670584 | 0 | N.A. | 0 |
| THRA         | -0,11644365  | -0,178694904 | 0 | N.A. | 0 |
| ZNF805       | -0,11652738  | 0,209285367  | 0 | N.A. | 0 |
| PIFO         | -0,116589876 | -0,341612058 | 0 | N.A. | 0 |
| RP5-1057I20  | -0,116598555 | 0,055082955  | 0 | N.A. | 0 |



|             |              |              |   |      |   |
|-------------|--------------|--------------|---|------|---|
| LRRC14      | -0,116633308 | 0,143190583  | 0 | N.A. | 0 |
| NCF4        | -0,11665215  | -0,304065347 | 0 | N.A. | 0 |
| GHDC        | -0,116680966 | 0,103695653  | 0 | N.A. | 0 |
| CFTR        | -0,116710349 | -0,185027059 | 0 | N.A. | 0 |
| KBTBD7      | -0,11676993  | -0,20958342  | 0 | N.A. | 0 |
| IFFO1       | -0,116780264 | -0,206197022 | 0 | N.A. | 0 |
| DALRD3      | -0,116850865 | 0,120793276  | 0 | N.A. | 0 |
| PTPN4       | -0,116864197 | -0,132581187 | 0 | N.A. | 0 |
| ITGA10      | -0,116966636 | 0,03465005   | 0 | N.A. | 0 |
| GNPDA1      | -0,117036716 | -0,161200979 | 0 | N.A. | 0 |
| RP11-406H23 | -0,117075187 | 0,335806186  | 0 | N.A. | 0 |
| TTLL7       | -0,11714213  | -0,110790222 | 0 | N.A. | 0 |
| FAM178B     | -0,117218644 | -0,22160522  | 0 | N.A. | 0 |
| CWH43       | -0,117219943 | -0,354228384 | 0 | N.A. | 0 |
| RP11-145M4  | -0,117234972 |              | 0 | N.A. | 0 |
| ADCK4       | -0,117299778 | -0,022410356 | 0 | N.A. | 0 |
| SETD4       | -0,117326766 | -0,040003411 | 0 | N.A. | 0 |
| FOXS1       | -0,117344346 |              | 0 | N.A. | 0 |
| BOLA3-AS1   | -0,117424683 |              | 0 | N.A. | 0 |
| SETDB2      | -0,117448814 | -0,31912173  | 0 | N.A. | 0 |
| C5orf63     | -0,117457069 | -0,118289687 | 0 | N.A. | 0 |
| DPY19L4     | -0,117472902 | -0,005603849 | 0 | N.A. | 0 |
| LINC01515   | -0,117476118 | -0,11907776  | 0 | N.A. | 0 |
| OSBPL6      | -0,117537906 |              | 0 | N.A. | 0 |
| RP11-314O13 | -0,117538924 | -0,246778365 | 0 | N.A. | 0 |
| SCFD1       | -0,117562674 | 0,201257691  | 0 | N.A. | 0 |
| CCNO        | -0,117610458 | -0,006004973 | 0 | N.A. | 0 |
| PTCH2       | -0,117659441 | 0,102868808  | 0 | N.A. | 0 |
| XPNPEP3     | -0,117762007 | -0,358259212 | 0 | N.A. | 0 |
| ZNF280A     | -0,117914451 | -0,135946787 | 0 | N.A. | 0 |
| GAD1        | -0,117924359 | -0,193741945 | 0 | N.A. | 0 |
| SLC39A10    | -0,118126854 | 0,364013747  | 0 | N.A. | 0 |
| PTPRD-AS1   | -0,118173117 | -0,070770311 | 0 | N.A. | 0 |

|               |                     |                    |          |            |   |
|---------------|---------------------|--------------------|----------|------------|---|
| FANCE         | -0,118217137        | 0,063700865        | 0        | N.A.       | 0 |
| U2AF1         | -0,118334886        | -0,079472813       | 0        | N.A.       | 0 |
| MAP4K2        | -0,118344121        | -0,094756372       | 0        | N.A.       | 0 |
| ATG4B         | -0,118388979        | 0,427648058        | 0        | N.A.       | 0 |
| HLF           | -0,118484753        | 0,018448765        | 0        | N.A.       | 0 |
| SPIB          | -0,118580508        | -0,191701602       | 0        | N.A.       | 0 |
| ZNF684        | -0,1187658          | -0,066585783       | 0        | N.A.       | 0 |
| RAB20         | -0,118804543        | 0,188438983        | 0        | N.A.       | 0 |
| C3orf67       | -0,118810406        | 0,277930652        | 0        | N.A.       | 0 |
| CHMP7         | -0,118886418        | -0,125125377       | 0        | N.A.       | 0 |
| KCTD17        | -0,118903736        | -0,357734061       | 0        | N.A.       | 0 |
| LIN52         | -0,118911418        | 0,061889243        | 0        | N.A.       | 0 |
| SLC41A1       | -0,118937953        | 0,01401526         | 0        | N.A.       | 0 |
| MYCBP2        | -0,11900177         | 0,270661594        | 0        | N.A.       | 0 |
| HOXC10        | -0,119141956        |                    | 0        | N.A.       | 0 |
| <b>RIMBP2</b> | <b>-0,119147054</b> | <b>0,059594188</b> | <b>1</b> | <b>cl2</b> | 0 |
| VTA1          | -0,119151734        | -0,111919382       | 0        | N.A.       | 0 |
| RNF32         | -0,119329524        | -0,184305319       | 0        | N.A.       | 0 |
| TPM1          | -0,119383786        | 0,151900973        | 0        | N.A.       | 0 |
| RILPL2        | -0,119385023        | -0,276884557       | 0        | N.A.       | 0 |
| ZNF501        | -0,119424942        | -0,196731398       | 0        | N.A.       | 0 |
| CTD-2383M3    | -0,119477803        | -0,161172714       | 0        | N.A.       | 0 |
| FARP1         | -0,119498263        | 0,061081009        | 0        | N.A.       | 0 |
| FAM208B       | -0,11952095         | 0,254636228        | 0        | N.A.       | 0 |
| CEP162        | -0,119591287        | -0,306158107       | 0        | N.A.       | 0 |
| MTSS1L        | -0,119613374        | 0,019826057        | 0        | N.A.       | 0 |
| ITGA7         | -0,119617952        | 0,007256277        | 0        | N.A.       | 0 |
| ATP11C        | -0,119623632        | 0,077624162        | 0        | N.A.       | 0 |
| RP11-1277A3   | -0,11965529         | 0,289443986        | 0        | N.A.       | 0 |
| LCP2          | -0,11975052         | 0,051246601        | 0        | N.A.       | 0 |
| G2E3          | -0,119789343        | 0,103309677        | 0        | N.A.       | 0 |
| DNAJC5B       | -0,119795948        | -0,119156043       | 0        | N.A.       | 0 |
| RP1-257A7.4   | -0,119797853        |                    | 0        | N.A.       | 0 |

|              |                     |                     |          |             |   |
|--------------|---------------------|---------------------|----------|-------------|---|
| CLCNKB       | -0,119816993        |                     | 0        | N.A.        | 0 |
| RP5-994D16.  | -0,119826642        | -0,281038577        | 0        | N.A.        | 0 |
| C17orf49     | -0,119845078        | -0,075050085        | 0        | N.A.        | 0 |
| SHKBP1       | -0,119930038        | -0,207221397        | 0        | N.A.        | 0 |
| DIS3L2       | -0,119934977        | 0,059262901         | 0        | N.A.        | 0 |
| BAG1         | -0,12004945         | 0,11031176          | 0        | N.A.        | 0 |
| RP11-299J3.8 | -0,120049662        | -0,030718704        | 0        | N.A.        | 0 |
| <b>GSTA1</b> | <b>-0,120106338</b> | <b>-0,139214776</b> | <b>1</b> | <b>none</b> | 0 |
| PKN3         | -0,1201596          | -0,08426498         | 0        | N.A.        | 0 |
| TTC19        | -0,120253706        | -0,025359081        | 0        | N.A.        | 0 |
| CXCR4        | -0,120332514        | -0,219140151        | 0        | N.A.        | 0 |
| ARPC1A       | -0,120339703        | 0,096353903         | 0        | N.A.        | 0 |
| CIB2         | -0,120425435        | 0,033418575         | 0        | N.A.        | 0 |
| SLC43A3      | -0,120483556        | -0,102198714        | 0        | N.A.        | 0 |
| <b>HOXB8</b> | <b>-0,120500663</b> | <b>-0,107560259</b> | <b>1</b> | <b>cl2</b>  | 0 |
| EVX1-AS      | -0,120517198        | 0,176984319         | 0        | N.A.        | 0 |
| DNAJC22      | -0,120519977        | -0,062894144        | 0        | N.A.        | 0 |
| PPP4R2       | -0,120538862        | 0,124989554         | 0        | N.A.        | 0 |
| PCK2         | -0,120606439        | 0,227955364         | 0        | N.A.        | 0 |
| RP11-115C21  | -0,120744254        | -0,051701871        | 0        | N.A.        | 0 |
| MFN1         | -0,120764638        | 0,008191744         | 0        | N.A.        | 0 |
| BDH1         | -0,120777846        | -0,003751202        | 0        | N.A.        | 0 |
| C2orf70      | -0,120811148        | -0,164809025        | 0        | N.A.        | 0 |
| PSTK         | -0,120817136        | -0,204245395        | 0        | N.A.        | 0 |
| ATXN7L3B     | -0,120932582        | -0,145932267        | 0        | N.A.        | 0 |
| ATF7         | -0,121048704        | 0,18984603          | 0        | N.A.        | 0 |
| UBA3         | -0,121079937        | -0,164196561        | 0        | N.A.        | 0 |
| RP11-359B12  | -0,121081783        | -0,080380747        | 0        | N.A.        | 0 |
| STAMBPL1     | -0,1211415          | -0,01146746         | 0        | N.A.        | 0 |
| RP11-11N9.4  | -0,121162977        | -0,270063207        | 0        | N.A.        | 0 |
| TNFSF13B     | -0,121195298        | 0,024930469         | 0        | N.A.        | 0 |
| ECD          | -0,121221255        | -0,311123525        | 0        | N.A.        | 0 |
| AGGF1        | -0,121278832        | -0,198621408        | 0        | N.A.        | 0 |

|             |              |              |   |      |   |
|-------------|--------------|--------------|---|------|---|
| BPTF        | -0,121297918 | 0,246088066  | 0 | N.A. | 0 |
| PROX1       | -0,121404408 | -0,199984008 | 0 | N.A. | 0 |
| SIGLEC9     | -0,121418332 | 0,087948413  | 0 | N.A. | 0 |
| NINL        | -0,121445909 | 0,104201373  | 0 | N.A. | 0 |
| SFXN5       | -0,121447408 | -0,044271562 | 0 | N.A. | 0 |
| LINC00858   | -0,121483283 | 0,009901924  | 0 | N.A. | 0 |
| PPIL2       | -0,121642261 | 0,347996511  | 0 | N.A. | 0 |
| TMEM89      | -0,121672522 |              | 0 | N.A. | 0 |
| ZNF813      | -0,121755277 | -0,112933301 | 0 | N.A. | 0 |
| TNFAIP8L3   | -0,121837399 |              | 0 | N.A. | 0 |
| FAM212A     | -0,121844623 | 0,075400901  | 0 | N.A. | 0 |
| LKAAEAR1    | -0,121855596 |              | 0 | N.A. | 0 |
| ECHDC3      | -0,12189369  | -0,317818774 | 0 | N.A. | 0 |
| DHCR24      | -0,121925648 | 0,310707335  | 0 | N.A. | 0 |
| PKIG        | -0,121997615 | -0,096309882 | 0 | N.A. | 0 |
| PCYT2       | -0,122038217 | 0,475257412  | 0 | N.A. | 0 |
| ZMAT5       | -0,122051744 | -0,145377904 | 0 | N.A. | 0 |
| E2F6        | -0,122095267 | -0,22535916  | 0 | N.A. | 0 |
| RP11-27K13. | -0,122100017 | -0,169408637 | 0 | N.A. | 0 |
| RP11-93K22. | -0,122104462 | 0,026280281  | 0 | N.A. | 0 |
| RP11-323F24 | -0,122160088 | 0,036713347  | 0 | N.A. | 0 |
| ZBTB2       | -0,122190515 | -0,184410913 | 0 | N.A. | 0 |
| LL22NC03-75 | -0,122322409 | 0,060324184  | 0 | N.A. | 0 |
| CLPX        | -0,122353753 | 0,008185609  | 0 | N.A. | 0 |
| PTPN20A     | -0,122517483 |              | 0 | N.A. | 0 |
| HIST3H2A    | -0,122575236 | -0,004433302 | 0 | N.A. | 0 |
| EVL         | -0,122589772 | -0,341864222 | 0 | N.A. | 0 |
| H1FX-AS1    | -0,122592174 |              | 0 | N.A. | 0 |
| C19orf73    | -0,122607086 | -0,087969493 | 0 | N.A. | 0 |
| FAM221A     | -0,122705129 | -0,278782706 | 0 | N.A. | 0 |
| CASC11      | -0,122764689 | -0,160817471 | 0 | N.A. | 0 |
| KIF25       | -0,122775668 |              | 0 | N.A. | 0 |
| FLI1        | -0,122821388 | -0,018377443 | 0 | N.A. | 0 |

|             |              |              |   |      |   |
|-------------|--------------|--------------|---|------|---|
| DDN         | -0,122838506 | -0,169149517 | 0 | N.A. | 0 |
| MTIF3       | -0,122925796 | -0,041441706 | 0 | N.A. | 0 |
| MED10       | -0,122928427 | 0,153881971  | 0 | N.A. | 0 |
| ALDH18A1    | -0,122930996 | -0,04363162  | 0 | N.A. | 0 |
| DEFA6       | -0,122932339 | 0,0542539    | 0 | N.A. | 0 |
| HEPACAM2    | -0,122933633 | -0,048456419 | 0 | N.A. | 0 |
| AIF1L       | -0,123063828 | -0,069615846 | 0 | N.A. | 0 |
| RP13-1032I1 | -0,123066564 | -0,132807336 | 0 | N.A. | 0 |
| RP3-477O4.1 | -0,123077852 |              | 0 | N.A. | 0 |
| RAB23       | -0,123123251 | -0,278477398 | 0 | N.A. | 0 |
| ANXA13      | -0,123161746 | 0,067140886  | 0 | N.A. | 0 |
| CHSY1       | -0,123163245 | 0,167747104  | 0 | N.A. | 0 |
| BTBD8       | -0,123165711 | 0,082351401  | 0 | N.A. | 0 |
| PTPN11      | -0,123167832 | -0,057774159 | 0 | N.A. | 0 |
| RP4-728D4.2 | -0,12318552  |              | 0 | N.A. | 0 |
| TNFAIP6     | -0,123281792 | 0,027928222  | 0 | N.A. | 0 |
| SETD3       | -0,123302499 | -0,060221928 | 0 | N.A. | 0 |
| P3H4        | -0,123316872 | 0,136863205  | 0 | N.A. | 0 |
| LAMA5-AS1   | -0,123356063 | 0,051503027  | 0 | N.A. | 0 |
| CTD-2293H3  | -0,123375573 |              | 0 | N.A. | 0 |
| TYW1B       | -0,123388708 | -0,171885665 | 0 | N.A. | 0 |
| RP11-89G4.1 | -0,123392056 | 0,154518784  | 0 | N.A. | 0 |
| RP11-498P14 | -0,123407633 | 0,024356232  | 0 | N.A. | 0 |
| RP11-488C13 | -0,123491093 | -0,095687091 | 0 | N.A. | 0 |
| SP5         | -0,123539792 | 0,122998334  | 0 | N.A. | 0 |
| DLST        | -0,123582312 | 0,258294388  | 0 | N.A. | 0 |
| LZTS1       | -0,12365308  |              | 0 | N.A. | 0 |
| LACE1       | -0,123656538 | -0,137177096 | 0 | N.A. | 0 |
| GNL1        | -0,123700957 | -0,171500551 | 0 | N.A. | 0 |
| SPRTN       | -0,123830886 | -0,087852838 | 0 | N.A. | 0 |
| SPIN4       | -0,123841432 | -0,086066074 | 0 | N.A. | 0 |
| C1D         | -0,123931247 | -0,05455789  | 0 | N.A. | 0 |
| DNAJC21     | -0,123997273 | 0,180910978  | 0 | N.A. | 0 |

|              |              |              |   |      |   |
|--------------|--------------|--------------|---|------|---|
| RAB27A       | -0,124041373 | -0,270757388 | 0 | N.A. | 0 |
| ASCC3        | -0,124050235 | -0,015338249 | 0 | N.A. | 0 |
| SMCO4        | -0,12415018  | 0,184587721  | 0 | N.A. | 0 |
| APBB1IP      | -0,124152107 | -0,185527777 | 0 | N.A. | 0 |
| LRRC24       | -0,124238865 | -0,097919663 | 0 | N.A. | 0 |
| RP11-426C22  | -0,124257741 | -0,064951498 | 0 | N.A. | 0 |
| SEMA3G       | -0,124354516 |              | 0 | N.A. | 0 |
| C5orf49      | -0,124563502 |              | 0 | N.A. | 0 |
| GSTK1        | -0,12462875  | -0,265726472 | 0 | N.A. | 0 |
| ABCC6        | -0,124701361 | -0,205360777 | 0 | N.A. | 0 |
| RP1-178F15.4 | -0,124724906 | 0,087168243  | 0 | N.A. | 0 |
| TRAM2-AS1    | -0,124783902 | -0,189785447 | 0 | N.A. | 0 |
| CMAS         | -0,124828697 | -0,032592404 | 0 | N.A. | 0 |
| PAWR         | -0,124869777 | 0,406498871  | 0 | N.A. | 0 |
| AMACR        | -0,124882279 | -0,154985659 | 0 | N.A. | 0 |
| PEX6         | -0,12502386  | -0,304123976 | 0 | N.A. | 0 |
| ASPN         | -0,125064579 | -0,043266766 | 0 | N.A. | 0 |
| KCNIP3       | -0,125065907 | 0,116095858  | 0 | N.A. | 0 |
| SLC9B1       | -0,125122619 | -0,01567862  | 0 | N.A. | 0 |
| SLC2A5       | -0,125157317 | -0,23691223  | 0 | N.A. | 0 |
| HRASLS       | -0,125165829 | 0,258992819  | 0 | N.A. | 0 |
| HS3ST3B1     | -0,12522815  | 0,102942049  | 0 | N.A. | 0 |
| ATP6V1B2     | -0,125273638 | 0,079667524  | 0 | N.A. | 0 |
| RP5-1007H16  | -0,125304298 | 0,26839848   | 0 | N.A. | 0 |
| MOXD1        | -0,125367013 | -0,208805464 | 0 | N.A. | 0 |
| MYCN         | -0,125367953 | 0,038206712  | 0 | N.A. | 0 |
| SLC25A46     | -0,125372347 | 0,017090273  | 0 | N.A. | 0 |
| ZNF527       | -0,125397276 | -0,152970958 | 0 | N.A. | 0 |
| PSMD5        | -0,125444043 | -0,145831875 | 0 | N.A. | 0 |
| DOK7         | -0,125447297 | -0,326800046 | 0 | N.A. | 0 |
| CCDC134      | -0,12552337  | -0,115694312 | 0 | N.A. | 0 |
| RASSF8-AS1   | -0,125544217 | -0,047438404 | 0 | N.A. | 0 |
| LIPT2        | -0,125559888 | -0,259929209 | 0 | N.A. | 0 |

|             |              |              |   |      |   |
|-------------|--------------|--------------|---|------|---|
| CABYR       | -0,12560785  | -0,348743052 | 0 | N.A. | 0 |
| C21orf33    | -0,125631298 | -0,045686448 | 0 | N.A. | 0 |
| CACHD1      | -0,125658989 | -0,002184318 | 0 | N.A. | 0 |
| PPP1R35     | -0,125693635 | 0,019985914  | 0 | N.A. | 0 |
| TMEM241     | -0,125702374 | -0,148711396 | 0 | N.A. | 0 |
| RANBP2      | -0,125728111 | 0,290041307  | 0 | N.A. | 0 |
| ZNF507      | -0,125780307 | 0,035098376  | 0 | N.A. | 0 |
| IFT88       | -0,125780829 | -0,014895383 | 0 | N.A. | 0 |
| TRAF3IP1    | -0,125870482 | 0,019910416  | 0 | N.A. | 0 |
| CTSH        | -0,125977905 | 0,259115464  | 0 | N.A. | 0 |
| DEXI        | -0,125999549 | 0,115211667  | 0 | N.A. | 0 |
| NRTN        | -0,126008413 | -0,059103407 | 0 | N.A. | 0 |
| RP11-533E19 | -0,126021845 | -0,217552571 | 0 | N.A. | 0 |
| CTD-2203K17 | -0,126044438 | -0,123915896 | 0 | N.A. | 0 |
| MRAS        | -0,126142611 | -0,188850404 | 0 | N.A. | 0 |
| PPP2R5C     | -0,126197765 | -0,175875556 | 0 | N.A. | 0 |
| AP3M1       | -0,126221862 | 0,214540555  | 0 | N.A. | 0 |
| ADCY1       | -0,126236642 |              | 0 | N.A. | 0 |
| C20orf144   | -0,126270883 | 0,222289822  | 0 | N.A. | 0 |
| RP11-418J17 | -0,126290062 | 0,016079699  | 0 | N.A. | 0 |
| PMM2        | -0,126304939 | -0,219199373 | 0 | N.A. | 0 |
| PDS5A       | -0,126491201 | 0,180750142  | 0 | N.A. | 0 |
| SERPINA11   | -0,126511251 |              | 0 | N.A. | 0 |
| KCNJ3       | -0,126565207 | 0,078749144  | 0 | N.A. | 0 |
| HOXB5       | -0,126612833 | 0,13633162   | 0 | N.A. | 0 |
| PTPRS       | -0,126677354 | -0,277010935 | 0 | N.A. | 0 |
| RP11-93H24  | -0,126732872 | -0,103224128 | 0 | N.A. | 0 |
| TYRO3       | -0,12675732  | 0,364233744  | 0 | N.A. | 0 |
| ATM         | -0,126764006 | -0,038545592 | 0 | N.A. | 0 |
| FBXO45      | -0,126765469 | -0,081034976 | 0 | N.A. | 0 |
| C6orf57     | -0,126791876 | -0,302905269 | 0 | N.A. | 0 |
| CXCR6       | -0,126800934 | -0,255908773 | 0 | N.A. | 0 |
| ZKSCAN8     | -0,126928739 | 0,009141305  | 0 | N.A. | 0 |

|             |              |              |   |      |   |
|-------------|--------------|--------------|---|------|---|
| RP11-835E18 | -0,126956383 | -0,267219395 | 0 | N.A. | 0 |
| LINC01311   | -0,127006237 | -0,132484527 | 0 | N.A. | 0 |
| RP11-1069G1 | -0,127052415 | 0,119090677  | 0 | N.A. | 0 |
| CH507-154B1 | -0,127062429 | -0,159118561 | 0 | N.A. | 0 |
| RPN1        | -0,127066913 | 0,047552707  | 0 | N.A. | 0 |
| TDG         | -0,127116722 | 0,32276043   | 0 | N.A. | 0 |
| CD28        | -0,127118127 | -0,088758096 | 0 | N.A. | 0 |
| RP13-401N81 | -0,127141007 | -0,316515634 | 0 | N.A. | 0 |
| RP11-589C21 | -0,127166016 | 0,036932738  | 0 | N.A. | 0 |
| ITGA9       | -0,127180791 | -0,011294976 | 0 | N.A. | 0 |
| HEXIM2      | -0,127208399 | -0,304651005 | 0 | N.A. | 0 |
| FADD        | -0,127212633 | -0,030063941 | 0 | N.A. | 0 |
| USP45       | -0,127214915 | 0,314932644  | 0 | N.A. | 0 |
| VPS26B      | -0,127334644 | 0,159119139  | 0 | N.A. | 0 |
| UBA1        | -0,12734213  | 0,418028593  | 0 | N.A. | 0 |
| BLVRA       | -0,127414306 | -0,20023982  | 0 | N.A. | 0 |
| CSTF2T      | -0,127495195 | -0,083694516 | 0 | N.A. | 0 |
| ORM2        | -0,127504298 | -0,125740945 | 0 | N.A. | 0 |
| GRAP2       | -0,127509724 | -0,224931514 | 0 | N.A. | 0 |
| FAM86C1     | -0,127546176 | -0,082168892 | 0 | N.A. | 0 |
| HCG14       | -0,127546488 | -0,111644555 | 0 | N.A. | 0 |
| ATOH1       | -0,127567028 | -0,068849792 | 0 | N.A. | 0 |
| PART1       | -0,127745104 | -0,170974327 | 0 | N.A. | 0 |
| RP11-703H81 | -0,127751322 | -0,040043206 | 0 | N.A. | 0 |
| TRMT2B      | -0,127789793 | -0,086424507 | 0 | N.A. | 0 |
| GPKOW       | -0,127791204 | 0,021165169  | 0 | N.A. | 0 |
| RP5-1057I20 | -0,127901099 |              | 0 | N.A. | 0 |
| CXorf56     | -0,127958753 | -0,353384326 | 0 | N.A. | 0 |
| EIF2AK2     | -0,127978404 | 0,092692098  | 0 | N.A. | 0 |
| RP5-1171I10 | -0,127997965 | -0,048966773 | 0 | N.A. | 0 |
| IQCC        | -0,128045414 | -0,084771638 | 0 | N.A. | 0 |
| PRRC2A      | -0,128093899 | -0,004007738 | 0 | N.A. | 0 |
| SUPT3H      | -0,128120477 | -0,348639053 | 0 | N.A. | 0 |



|             |              |              |   |      |   |
|-------------|--------------|--------------|---|------|---|
| CTD-3025N2  | -0,128140054 | -0,046661525 | 0 | N.A. | 0 |
| RP11-37C7.3 | -0,128194097 | 0,023149295  | 0 | N.A. | 0 |
| AGXT        | -0,128266303 | -0,246739678 | 0 | N.A. | 0 |
| C18orf54    | -0,128275413 | -0,300336428 | 0 | N.A. | 0 |
| KIAA0922    | -0,128426448 | -0,21792434  | 0 | N.A. | 0 |
| CTD-2287O1  | -0,128536954 | -0,100754631 | 0 | N.A. | 0 |
| ZNF219      | -0,12857292  | -0,134934072 | 0 | N.A. | 0 |
| CNTROB      | -0,128599029 | -0,098753978 | 0 | N.A. | 0 |
| HSPA2       | -0,128603486 | -0,1044291   | 0 | N.A. | 0 |
| CCAT2       | -0,128629145 |              | 0 | N.A. | 0 |
| TSPYL1      | -0,128708696 | 0,015326698  | 0 | N.A. | 0 |
| AF064858.7  | -0,12871355  |              | 0 | N.A. | 0 |
| PDCL        | -0,128789718 | 0,113525431  | 0 | N.A. | 0 |
| LYRM1       | -0,128809899 | -0,213170258 | 0 | N.A. | 0 |
| RP11-370I10 | -0,128891739 | 0,086637852  | 0 | N.A. | 0 |
| CTB-55O6.13 | -0,128918433 |              | 0 | N.A. | 0 |
| CD37        | -0,129031465 | -0,285975368 | 0 | N.A. | 0 |
| S100A1      | -0,129072074 | -0,191979227 | 0 | N.A. | 0 |
| UBL7-AS1    | -0,129157451 | 0,084535491  | 0 | N.A. | 0 |
| C1QC        | -0,129162919 | -0,250483387 | 0 | N.A. | 0 |
| DSCR3       | -0,129248502 | -0,042324734 | 0 | N.A. | 0 |
| CCL25       | -0,129250658 | 0,11182054   | 0 | N.A. | 0 |
| TPGS1       | -0,129272543 | 0,209981235  | 0 | N.A. | 0 |
| PSMA6       | -0,129296595 | -0,006447601 | 0 | N.A. | 0 |
| MED31       | -0,129426798 | -0,176654288 | 0 | N.A. | 0 |
| LCK         | -0,12945266  | -0,252067351 | 0 | N.A. | 0 |
| CTD-2540B15 | -0,129455264 | 0,06294544   | 0 | N.A. | 0 |
| RP11-544I20 | -0,12945993  | -0,029425528 | 0 | N.A. | 0 |
| TMEM194A    | -0,129466723 | -0,320561115 | 0 | N.A. | 0 |
| OSBPL9      | -0,129533871 | -0,041201257 | 0 | N.A. | 0 |
| CTD-2235C13 | -0,129603519 | 0,161341183  | 0 | N.A. | 0 |
| RP11-732A21 | -0,129659847 | 0,175008673  | 0 | N.A. | 0 |
| HIP1        | -0,129668254 | -0,388807235 | 0 | N.A. | 0 |

|              |              |              |   |      |   |
|--------------|--------------|--------------|---|------|---|
| PRKAG2-AS1   | -0,129682114 | -0,106726176 | 0 | N.A. | 0 |
| TBC1D16      | -0,12972826  | -0,328181027 | 0 | N.A. | 0 |
| DYX1C1       | -0,129739813 | -0,250003902 | 0 | N.A. | 0 |
| RP11-298I3.1 | -0,129768742 | 0,017838827  | 0 | N.A. | 0 |
| RP11-490B18  | -0,129781685 | -0,065385718 | 0 | N.A. | 0 |
| ECEL1        | -0,129790772 |              | 0 | N.A. | 0 |
| ANKRD18B     | -0,129804539 | 0,328980266  | 0 | N.A. | 0 |
| ZNF584       | -0,129804708 | 0,011452902  | 0 | N.A. | 0 |
| CD2          | -0,129824354 | -0,205776604 | 0 | N.A. | 0 |
| CPSF4L       | -0,129946158 | 0,402736728  | 0 | N.A. | 0 |
| IPO8         | -0,129948696 | -0,066637921 | 0 | N.A. | 0 |
| CEP250       | -0,129966307 | -0,146442515 | 0 | N.A. | 0 |
| ARC          | -0,130013566 | 0,189990657  | 0 | N.A. | 0 |
| NOTCH4       | -0,130023192 | -0,10588439  | 0 | N.A. | 0 |
| CIZ1         | -0,130056964 | 0,247501966  | 0 | N.A. | 0 |
| CTC-338M12   | -0,130075892 | -0,15041267  | 0 | N.A. | 0 |
| DVL2         | -0,130101979 | -0,016754898 | 0 | N.A. | 0 |
| CERS4        | -0,130132588 |              | 0 | N.A. | 0 |
| TUBG2        | -0,130177955 | 0,10416771   | 0 | N.A. | 0 |
| ERCC3        | -0,130179656 | 0,157326227  | 0 | N.A. | 0 |
| GLYCTK       | -0,130204301 | 0,262325978  | 0 | N.A. | 0 |
| SULT1A3      | -0,130274516 | -0,09081712  | 0 | N.A. | 0 |
| LSAMP        | -0,130349057 | -0,097481409 | 0 | N.A. | 0 |
| NCAM1        | -0,130411794 |              | 0 | N.A. | 0 |
| DHX16        | -0,130416538 | -0,075695354 | 0 | N.A. | 0 |
| RP11-536C5.  | -0,130515144 | 0,087942304  | 0 | N.A. | 0 |
| PFN4         | -0,130587557 |              | 0 | N.A. | 0 |
| MED19        | -0,130680235 | 0,091659113  | 0 | N.A. | 0 |
| IL26         | -0,130681575 | 0,081138471  | 0 | N.A. | 0 |
| AC105760.2   | -0,130858726 | -0,271075883 | 0 | N.A. | 0 |
| CEP89        | -0,130936163 | -0,189406766 | 0 | N.A. | 0 |
| SLC16A11     | -0,130977462 | -0,055280489 | 0 | N.A. | 0 |
| GSG2         | -0,130989555 | -0,139972754 | 0 | N.A. | 0 |

|             |              |              |   |      |   |
|-------------|--------------|--------------|---|------|---|
| RP11-20D14. | -0,131013339 | -0,064815792 | 0 | N.A. | 0 |
| AF064858.6  | -0,131035692 | -0,016912494 | 0 | N.A. | 0 |
| CNPY4       | -0,131082004 | 0,181988131  | 0 | N.A. | 0 |
| EWSAT1      | -0,131083408 | 0,096295576  | 0 | N.A. | 0 |
| XPNPEP1     | -0,131119026 | 0,102833573  | 0 | N.A. | 0 |
| TMED9       | -0,131131212 | 0,430478728  | 0 | N.A. | 0 |
| CTA-246H3.1 | -0,131205422 |              | 0 | N.A. | 0 |
| CCBL1       | -0,131222519 | -0,021433175 | 0 | N.A. | 0 |
| ZDHHC12     | -0,131249147 | 0,211003127  | 0 | N.A. | 0 |
| USP20       | -0,131270434 | 0,097808371  | 0 | N.A. | 0 |
| RP11-326C3. | -0,131366435 | -0,069346899 | 0 | N.A. | 0 |
| CLP1        | -0,131454986 | -0,041134123 | 0 | N.A. | 0 |
| RAD17       | -0,131577377 | -0,181912107 | 0 | N.A. | 0 |
| SMN1        | -0,131587936 | -0,142736407 | 0 | N.A. | 0 |
| CMTR1       | -0,131724454 | 0,234266697  | 0 | N.A. | 0 |
| CH507-3904  | -0,131785753 | -0,149520799 | 0 | N.A. | 0 |
| TCEAL7      | -0,131817138 | 0,003529533  | 0 | N.A. | 0 |
| KIAA0825    | -0,131872726 | -0,072647039 | 0 | N.A. | 0 |
| LCMT2       | -0,13192071  | -0,026356688 | 0 | N.A. | 0 |
| ZNF346      | -0,131973308 | -0,216341636 | 0 | N.A. | 0 |
| ZNF569      | -0,131999401 |              | 0 | N.A. | 0 |
| PLAC4       | -0,132153964 | 0,026674497  | 0 | N.A. | 0 |
| TCEANC2     | -0,132191881 | 0,029512398  | 0 | N.A. | 0 |
| XPC         | -0,132194079 | 0,323991381  | 0 | N.A. | 0 |
| RP11-96C23. | -0,132223862 |              | 0 | N.A. | 0 |
| MGST3       | -0,132251024 | 0,178260197  | 0 | N.A. | 0 |
| NTMT1       | -0,132340821 | 0,107078145  | 0 | N.A. | 0 |
| RP11-471B22 | -0,132475314 |              | 0 | N.A. | 0 |
| WASIR2      | -0,132551375 | 0,182659064  | 0 | N.A. | 0 |
| CTD-2366F13 | -0,132552136 | -0,139422953 | 0 | N.A. | 0 |
| RNF166      | -0,132634377 | -0,343704774 | 0 | N.A. | 0 |
| C5orf24     | -0,132650425 | 0,031294879  | 0 | N.A. | 0 |
| LFNG        | -0,132656175 | 0,087188253  | 0 | N.A. | 0 |

|             |              |              |   |      |   |
|-------------|--------------|--------------|---|------|---|
| FGFBP3      | -0,132657848 | -0,114367287 | 0 | N.A. | 0 |
| TOR1A       | -0,132791857 | 0,112786934  | 0 | N.A. | 0 |
| TSTD3       | -0,132879222 | -0,358656207 | 0 | N.A. | 0 |
| B4GALNT4    | -0,132918126 | 0,128721318  | 0 | N.A. | 0 |
| LRRC69      | -0,132976487 | 0,025930234  | 0 | N.A. | 0 |
| ELMO1       | -0,133012006 | -0,016995884 | 0 | N.A. | 0 |
| NR2F2       | -0,133059191 | 0,066512644  | 0 | N.A. | 0 |
| HOXD9       | -0,133155273 | -0,044643211 | 0 | N.A. | 0 |
| ADAD2       | -0,13322187  |              | 0 | N.A. | 0 |
| CTD-2033A10 | -0,133222584 | 0,191237451  | 0 | N.A. | 0 |
| HIST1H1D    | -0,133255462 | -0,403279524 | 0 | N.A. | 0 |
| PIH1D2      | -0,133263356 | -0,150896005 | 0 | N.A. | 0 |
| TNPO3       | -0,133453715 | 0,00107704   | 0 | N.A. | 0 |
| ABRACL      | -0,133465133 | -0,052291439 | 0 | N.A. | 0 |
| DUSP9       | -0,133473952 | -0,173726784 | 0 | N.A. | 0 |
| RP11-500C11 | -0,133476428 | -0,114267837 | 0 | N.A. | 0 |
| TRIP6       | -0,13348733  | 0,135827289  | 0 | N.A. | 0 |
| RP11-342M1  | -0,133495823 |              | 0 | N.A. | 0 |
| RP11-434E6. | -0,133616553 | -0,084834724 | 0 | N.A. | 0 |
| FZD2        | -0,133821814 |              | 0 | N.A. | 0 |
| LINC01356   | -0,133911382 | -0,132342084 | 0 | N.A. | 0 |
| NFRKB       | -0,133922629 | 0,284833445  | 0 | N.A. | 0 |
| RP11-7115.4 | -0,133936952 |              | 0 | N.A. | 0 |
| TSPAN13     | -0,134049095 | 0,178770632  | 0 | N.A. | 0 |
| BLOC1S5     | -0,134207527 | -0,18951983  | 0 | N.A. | 0 |
| EEF1A1      | -0,134261805 | -0,385434411 | 0 | N.A. | 0 |
| CTD-2033D11 | -0,134300917 |              | 0 | N.A. | 0 |
| LINC01485   | -0,134365697 | 0,02632041   | 0 | N.A. | 0 |
| VASH2       | -0,134388267 | -0,085947647 | 0 | N.A. | 0 |
| DCLRE1B     | -0,134406298 | -0,431335544 | 0 | N.A. | 0 |
| COCH        | -0,134517901 | -0,33805875  | 0 | N.A. | 0 |
| BEND3       | -0,134528603 | -0,089155029 | 0 | N.A. | 0 |
| C1QTNF9B-A  | -0,134567281 | -0,244910196 | 0 | N.A. | 0 |

|             |              |              |   |      |   |
|-------------|--------------|--------------|---|------|---|
| bP-21264C1. | -0,134735181 | -0,067597786 | 0 | N.A. | 0 |
| PPM1D       | -0,134738445 | -0,021552027 | 0 | N.A. | 0 |
| GGCX        | -0,134761554 | -0,188111859 | 0 | N.A. | 0 |
| EXOC6       | -0,134817656 | 0,052138986  | 0 | N.A. | 0 |
| PEX11G      | -0,134844892 | -0,089333499 | 0 | N.A. | 0 |
| SERPINH1    | -0,134856373 | 0,127891726  | 0 | N.A. | 0 |
| FASTKD1     | -0,134857425 | -0,189250206 | 0 | N.A. | 0 |
| MPG         | -0,134859883 | -0,226530707 | 0 | N.A. | 0 |
| ICAM3       | -0,134873184 | -0,387607061 | 0 | N.A. | 0 |
| ZNF681      | -0,134960373 | -0,21272167  | 0 | N.A. | 0 |
| GGNBP2      | -0,135020921 | -0,038359209 | 0 | N.A. | 0 |
| FLVCR1      | -0,13506181  | 0,04405803   | 0 | N.A. | 0 |
| TMEM143     | -0,135136071 | 0,045012914  | 0 | N.A. | 0 |
| C10orf88    | -0,13515141  | -0,295834461 | 0 | N.A. | 0 |
| CST1        | -0,135301169 | -0,016696397 | 0 | N.A. | 0 |
| ZFP69B      | -0,135308551 | 0,024353275  | 0 | N.A. | 0 |
| CC2D1A      | -0,135348464 | 0,202788239  | 0 | N.A. | 0 |
| GDF9        | -0,135356238 | -0,002512435 | 0 | N.A. | 0 |
| PGLS        | -0,135368896 | 0,007216815  | 0 | N.A. | 0 |
| C17orf96    | -0,135559703 | -0,194610841 | 0 | N.A. | 0 |
| RP5-956O18. | -0,135883502 | -0,000800248 | 0 | N.A. | 0 |
| AP000251.3  | -0,135911559 | -0,034333598 | 0 | N.A. | 0 |
| PCM1        | -0,135926486 | 0,075130768  | 0 | N.A. | 0 |
| XPO6        | -0,135983697 | 0,166634683  | 0 | N.A. | 0 |
| SPEF2       | -0,135984755 | -0,116752426 | 0 | N.A. | 0 |
| PYCARD      | -0,135985664 | 0,083952708  | 0 | N.A. | 0 |
| RECK        | -0,136079019 | 0,114534034  | 0 | N.A. | 0 |
| ZNF780B     | -0,13610918  | -0,326078819 | 0 | N.A. | 0 |
| HSPB11      | -0,136133987 | 0,006915578  | 0 | N.A. | 0 |
| TAL2        | -0,136154511 | -0,039912307 | 0 | N.A. | 0 |
| RP11-419J16 | -0,136177113 | -0,31653683  | 0 | N.A. | 0 |
| PHF10       | -0,136186232 | -0,119504328 | 0 | N.A. | 0 |
| EFCAB7      | -0,136197185 | -0,310012695 | 0 | N.A. | 0 |

|             |              |              |   |      |   |
|-------------|--------------|--------------|---|------|---|
| GPRASP2     | -0,136283407 | 0,290859869  | 0 | N.A. | 0 |
| RP11-187E13 | -0,136285046 | -0,14157872  | 0 | N.A. | 0 |
| AC009120.11 | -0,136395825 | 0,267148671  | 0 | N.A. | 0 |
| MLK7-AS1    | -0,136400974 |              | 0 | N.A. | 0 |
| RP11-84C10. | -0,136413071 |              | 0 | N.A. | 0 |
| RP11-563N4. | -0,136413209 | -0,147874781 | 0 | N.A. | 0 |
| RP11-35N6.1 | -0,136511454 | 0,192867929  | 0 | N.A. | 0 |
| DMRT1       | -0,13655764  | -0,006323414 | 0 | N.A. | 0 |
| KCNK15-AS1  | -0,13655947  | -0,200641934 | 0 | N.A. | 0 |
| SGCB        | -0,136564902 | -0,048599036 | 0 | N.A. | 0 |
| RP11-395A13 | -0,136588284 | 0,024577161  | 0 | N.A. | 0 |
| FMNL3       | -0,136630797 | -0,194401236 | 0 | N.A. | 0 |
| CSMD2       | -0,136700794 |              | 0 | N.A. | 0 |
| ANKRD54     | -0,13677546  | -0,222062889 | 0 | N.A. | 0 |
| POLR3D      | -0,136836195 | -0,060679132 | 0 | N.A. | 0 |
| METTL22     | -0,136857623 | -0,164612726 | 0 | N.A. | 0 |
| PSMG3-AS1   | -0,136952445 | -0,229510103 | 0 | N.A. | 0 |
| ZNF639      | -0,137024427 | -0,106228827 | 0 | N.A. | 0 |
| RP4-639F20. | -0,137034624 | 0,018205846  | 0 | N.A. | 0 |
| LHPP        | -0,137085762 | -0,184024996 | 0 | N.A. | 0 |
| RP11-109G23 | -0,137106446 | 0,052596177  | 0 | N.A. | 0 |
| LINC01021   | -0,13717694  | -0,056663581 | 0 | N.A. | 0 |
| RP11-372K14 | -0,137241191 | 0,008590929  | 0 | N.A. | 0 |
| ITPR2       | -0,137279071 | -0,023026427 | 0 | N.A. | 0 |
| FOXO6       | -0,137315838 | 0,314314213  | 0 | N.A. | 0 |
| VENTX       | -0,137321789 |              | 0 | N.A. | 0 |
| RP11-179B2. | -0,137327212 | -0,126953179 | 0 | N.A. | 0 |
| RASIP1      | -0,13738827  | -0,034166164 | 0 | N.A. | 0 |
| STMND1      | -0,13738985  | -0,273987565 | 0 | N.A. | 0 |
| RP13-1032I1 | -0,137403633 | -0,048189899 | 0 | N.A. | 0 |
| SNAI1       | -0,137439242 | -0,058855003 | 0 | N.A. | 0 |
| FAM225A     | -0,137452892 |              | 0 | N.A. | 0 |
| MAPK12      | -0,137458506 | -0,049100827 | 0 | N.A. | 0 |

|             |              |              |   |      |   |
|-------------|--------------|--------------|---|------|---|
| RP11-452K12 | -0,137558238 | 0,166813562  | 0 | N.A. | 0 |
| MT1A        | -0,137563741 | -0,313164801 | 0 | N.A. | 0 |
| MTG1        | -0,137566131 | 0,040070229  | 0 | N.A. | 0 |
| RP11-320N7. | -0,137593776 |              | 0 | N.A. | 0 |
| TRAF2       | -0,137619316 | 0,025764982  | 0 | N.A. | 0 |
| HOXA-AS2    | -0,137669844 | 0,067631886  | 0 | N.A. | 0 |
| CNP         | -0,137802557 | 0,113425538  | 0 | N.A. | 0 |
| GDF10       | -0,137889552 |              | 0 | N.A. | 0 |
| RP11-382D12 | -0,137932297 | -0,049602633 | 0 | N.A. | 0 |
| RP11-1000B6 | -0,13793751  | 0,155398628  | 0 | N.A. | 0 |
| SNAP47      | -0,137973484 | -0,186010889 | 0 | N.A. | 0 |
| SYP         | -0,137973977 | 0,071944616  | 0 | N.A. | 0 |
| DTNB        | -0,138012541 | -0,047481048 | 0 | N.A. | 0 |
| AC087294.2  | -0,138039997 | -0,006718913 | 0 | N.A. | 0 |
| RP11-22C11. | -0,13808396  | -0,119473985 | 0 | N.A. | 0 |
| FBXO17      | -0,138108233 | -0,016697065 | 0 | N.A. | 0 |
| ACSS3       | -0,138198031 |              | 0 | N.A. | 0 |
| MFSD3       | -0,138206621 | 0,048952625  | 0 | N.A. | 0 |
| PARP16      | -0,138208386 | -0,004688209 | 0 | N.A. | 0 |
| TMEM222     | -0,138402088 | -0,025623388 | 0 | N.A. | 0 |
| LINC00493   | -0,138425977 | -0,170950314 | 0 | N.A. | 0 |
| U91328.19   | -0,138442482 | 0,075459411  | 0 | N.A. | 0 |
| ALDH8A1     | -0,138470348 | -0,053885272 | 0 | N.A. | 0 |
| TDRD3       | -0,138573033 | 0,085027582  | 0 | N.A. | 0 |
| SAFB2       | -0,138573404 | 0,126894659  | 0 | N.A. | 0 |
| LOH12CR2    | -0,138826647 | 0,185449086  | 0 | N.A. | 0 |
| PPP1R1A     | -0,138861432 | -0,059431967 | 0 | N.A. | 0 |
| NMNAT1      | -0,138867274 | -0,317343704 | 0 | N.A. | 0 |
| MAEA        | -0,138885939 | 0,113238285  | 0 | N.A. | 0 |
| ADNP-AS1    | -0,138898703 | 0,109635043  | 0 | N.A. | 0 |
| XXbac-BPG25 | -0,13895918  | -0,288234772 | 0 | N.A. | 0 |
| PPT2        | -0,138998103 | 0,047361281  | 0 | N.A. | 0 |
| RP11-307L14 | -0,139007494 | -0,0999624   | 0 | N.A. | 0 |

|              |              |              |   |      |   |
|--------------|--------------|--------------|---|------|---|
| RNF115       | -0,139008027 | -0,195898979 | 0 | N.A. | 0 |
| PCGF5        | -0,139045695 | -0,043224429 | 0 | N.A. | 0 |
| ADAL         | -0,139048561 | -0,204194805 | 0 | N.A. | 0 |
| DNAJC10      | -0,139081422 | -0,02215739  | 0 | N.A. | 0 |
| AC010894.3   | -0,139110193 | 0,27457982   | 0 | N.A. | 0 |
| LIN7A        | -0,139125638 | -0,088778038 | 0 | N.A. | 0 |
| TDRP         | -0,139253178 |              | 0 | N.A. | 0 |
| SRRM5        | -0,139281679 | 0,020249443  | 0 | N.A. | 0 |
| C2orf48      | -0,139412885 | -0,081654182 | 0 | N.A. | 0 |
| CAPN7        | -0,139415048 | 0,408833412  | 0 | N.A. | 0 |
| LINC01573    | -0,139426136 |              | 0 | N.A. | 0 |
| ACTR5        | -0,13942825  | 0,21407844   | 0 | N.A. | 0 |
| RP11-332H14  | -0,139721086 | -0,049788484 | 0 | N.A. | 0 |
| ANKRD34B     | -0,139767788 |              | 0 | N.A. | 0 |
| CCZ1B        | -0,139801714 | 0,171445265  | 0 | N.A. | 0 |
| RLN1         | -0,13981044  |              | 0 | N.A. | 0 |
| ARHGDIB      | -0,139820713 | -0,480614547 | 0 | N.A. | 0 |
| ZNF143       | -0,13982809  | -0,043477659 | 0 | N.A. | 0 |
| USP46-AS1    | -0,139843409 | -0,31179807  | 0 | N.A. | 0 |
| TAS2R30      | -0,139900366 | -0,196281515 | 0 | N.A. | 0 |
| IGFL4        | -0,13999486  | 0,349206214  | 0 | N.A. | 0 |
| OLFM4        | -0,140044751 | -0,024729785 | 0 | N.A. | 0 |
| CTC-461F20.  | -0,140090483 | 0,009955539  | 0 | N.A. | 0 |
| DPP7         | -0,140123305 | -0,089275862 | 0 | N.A. | 0 |
| TCTE3        | -0,140167617 | 0,005604715  | 0 | N.A. | 0 |
| CTC-444N24.  | -0,140199683 |              | 0 | N.A. | 0 |
| LANCL1       | -0,140229095 | -0,098900507 | 0 | N.A. | 0 |
| RRP8         | -0,140253568 | -0,108713443 | 0 | N.A. | 0 |
| NPW          | -0,14025712  | -0,119820643 | 0 | N.A. | 0 |
| BMS1         | -0,140354712 | 0,296289597  | 0 | N.A. | 0 |
| RP11-313P13  | -0,140428505 | -0,277699064 | 0 | N.A. | 0 |
| HMGCL        | -0,140467289 | 0,176111126  | 0 | N.A. | 0 |
| RP11-646I6.6 | -0,140525614 | 0,007385164  | 0 | N.A. | 0 |



|             |              |              |   |      |   |
|-------------|--------------|--------------|---|------|---|
| TMEM218     | -0,140574329 | -0,257153826 | 0 | N.A. | 0 |
| GRM8        | -0,140577286 | -0,19163009  | 0 | N.A. | 0 |
| FAM133B     | -0,140589717 | 0,04220408   | 0 | N.A. | 0 |
| BSPRY       | -0,140598948 | 0,091369821  | 0 | N.A. | 0 |
| ASB8        | -0,140738101 | -0,203507816 | 0 | N.A. | 0 |
| IGFLR1      | -0,140891151 | -0,052935518 | 0 | N.A. | 0 |
| C1orf186    | -0,140936857 | -0,119191746 | 0 | N.A. | 0 |
| LRRC40      | -0,140948958 | -0,090943776 | 0 | N.A. | 0 |
| CTD-2256P15 | -0,141072621 | -0,162905158 | 0 | N.A. | 0 |
| RP11-141B14 | -0,141077655 | 0,07469367   | 0 | N.A. | 0 |
| GABPB1-AS1  | -0,141084157 | 0,017494566  | 0 | N.A. | 0 |
| CCDC175     | -0,141104024 | 0,117781459  | 0 | N.A. | 0 |
| Z83851.4    | -0,141210586 | -0,123529564 | 0 | N.A. | 0 |
| CEP72       | -0,141248008 | -0,146617013 | 0 | N.A. | 0 |
| LRP8        | -0,141323194 | 0,061033319  | 0 | N.A. | 0 |
| EPHX4       | -0,141331726 | -0,024268374 | 0 | N.A. | 0 |
| PLBD1       | -0,141468115 | 0,07419372   | 0 | N.A. | 0 |
| ZNF502      | -0,141509972 | -0,298002816 | 0 | N.A. | 0 |
| ILVBL       | -0,141519478 | 0,093136052  | 0 | N.A. | 0 |
| PKP2        | -0,14152061  | 0,11301884   | 0 | N.A. | 0 |
| RP11-120D5. | -0,141571379 | -0,121622286 | 0 | N.A. | 0 |
| RABL2A      | -0,141669901 | 0,057211809  | 0 | N.A. | 0 |
| RP11-596C23 | -0,141680456 | 0,01477941   | 0 | N.A. | 0 |
| AMPD2       | -0,141687107 | -0,137590325 | 0 | N.A. | 0 |
| NRSN2       | -0,141728961 | 0,057039477  | 0 | N.A. | 0 |
| DYNLL1      | -0,141776545 | -0,132775522 | 0 | N.A. | 0 |
| ZNF512      | -0,14181815  | -0,149343279 | 0 | N.A. | 0 |
| GPR63       | -0,141967039 |              | 0 | N.A. | 0 |
| HEXB        | -0,142053771 | -0,040790393 | 0 | N.A. | 0 |
| RHOV        | -0,142105729 | 0,186266782  | 0 | N.A. | 0 |
| ANAPC16     | -0,142131393 | -0,13973098  | 0 | N.A. | 0 |
| C5          | -0,142216562 | -0,156181568 | 0 | N.A. | 0 |
| TMEM101     | -0,142357104 | 0,07752224   | 0 | N.A. | 0 |

|             |              |              |   |      |   |
|-------------|--------------|--------------|---|------|---|
| FSCN1       | -0,142466984 | 0,071219736  | 0 | N.A. | 0 |
| RP11-43505  | -0,142480544 | -0,243674385 | 0 | N.A. | 0 |
| TOMM40L     | -0,142581244 | -0,338869692 | 0 | N.A. | 0 |
| TMCO6       | -0,142698472 | 0,034419512  | 0 | N.A. | 0 |
| CTD-319301  | -0,142717658 | 0,069994528  | 0 | N.A. | 0 |
| ZNF573      | -0,142779037 | 0,124386626  | 0 | N.A. | 0 |
| AP000439.3  | -0,142958248 | 0,149313008  | 0 | N.A. | 0 |
| GRK1        | -0,143017413 | -0,046240502 | 0 | N.A. | 0 |
| RP11-138J23 | -0,143057382 | 0,018460532  | 0 | N.A. | 0 |
| MCMDC2      | -0,143069345 | -0,269320065 | 0 | N.A. | 0 |
| RBM45       | -0,143180148 | -0,183555989 | 0 | N.A. | 0 |
| TMSB15B     | -0,143210833 | -0,036706573 | 0 | N.A. | 0 |
| DMKN        | -0,143234406 | -0,101025631 | 0 | N.A. | 0 |
| NMU         | -0,143259244 | -0,216599143 | 0 | N.A. | 0 |
| ARFGAP2     | -0,143314503 | 0,309638255  | 0 | N.A. | 0 |
| RP11-191L17 | -0,143355512 | 0,061668585  | 0 | N.A. | 0 |
| S100PBP     | -0,143360553 | -0,243479818 | 0 | N.A. | 0 |
| HOTAIR      | -0,143641863 | 0,070210936  | 0 | N.A. | 0 |
| FAM57B      | -0,143696765 |              | 0 | N.A. | 0 |
| MBD3        | -0,14369686  | -0,053266332 | 0 | N.A. | 0 |
| AC002310.7  | -0,143699778 | -0,222457682 | 0 | N.A. | 0 |
| C1orf52     | -0,143784415 | -0,00047364  | 0 | N.A. | 0 |
| TAF1B       | -0,143885019 | -0,011383163 | 0 | N.A. | 0 |
| CTB-193M12  | -0,143894463 | -0,04010113  | 0 | N.A. | 0 |
| STK38L      | -0,14394845  | -0,16446727  | 0 | N.A. | 0 |
| AXIN2       | -0,143981026 | 0,091604158  | 0 | N.A. | 0 |
| CNIH4       | -0,144036938 | 0,02589252   | 0 | N.A. | 0 |
| RNF130      | -0,144061684 | -0,38285293  | 0 | N.A. | 0 |
| DCAF12      | -0,144093255 | -0,151580117 | 0 | N.A. | 0 |
| KLHL13      | -0,144146307 |              | 0 | N.A. | 0 |
| POC1B-GALN  | -0,144215015 | 0,002572478  | 0 | N.A. | 0 |
| HKR1        | -0,144242704 | 0,042025748  | 0 | N.A. | 0 |
| CH507-154B  | -0,144268294 | -0,020326036 | 0 | N.A. | 0 |

|              |              |              |   |      |   |
|--------------|--------------|--------------|---|------|---|
| PIWIL1       | -0,144300545 | 0,208534114  | 0 | N.A. | 0 |
| C14orf93     | -0,144306036 | -0,186565907 | 0 | N.A. | 0 |
| HIST1H2BL    | -0,144340262 | -0,27040894  | 0 | N.A. | 0 |
| ALG13        | -0,144350785 | -0,244877447 | 0 | N.A. | 0 |
| SUCLG2-AS1   | -0,1443517   | -0,067778331 | 0 | N.A. | 0 |
| ZNF181       | -0,144385389 | -0,038850952 | 0 | N.A. | 0 |
| CCHCR1       | -0,144402761 | -0,243669259 | 0 | N.A. | 0 |
| NEUROG2      | -0,144442101 | -0,019387735 | 0 | N.A. | 0 |
| IMPACT       | -0,14446441  | -0,313327625 | 0 | N.A. | 0 |
| FERMT1       | -0,144585571 | 0,163322298  | 0 | N.A. | 0 |
| IFT46        | -0,144624096 | 0,164087858  | 0 | N.A. | 0 |
| RP11-290D2.1 | -0,144768176 | -0,040637056 | 0 | N.A. | 0 |
| DLL3         | -0,144832871 | -0,053393967 | 0 | N.A. | 0 |
| ROMO1        | -0,144857042 | -0,240793653 | 0 | N.A. | 0 |
| POLE         | -0,144867139 | 0,108756827  | 0 | N.A. | 0 |
| PEX19        | -0,144874731 | 0,072751224  | 0 | N.A. | 0 |
| BAAT         | -0,144920426 | -0,171392249 | 0 | N.A. | 0 |
| CTCF         | -0,14496145  | -0,022594471 | 0 | N.A. | 0 |
| RP13-895J2.3 | -0,145034104 | 0,028987564  | 0 | N.A. | 0 |
| RP13-582O9.1 | -0,145057523 | 0,059945963  | 0 | N.A. | 0 |
| AC022182.3   | -0,145078137 | -0,023315451 | 0 | N.A. | 0 |
| KIF12        | -0,145084453 | -0,000723961 | 0 | N.A. | 0 |
| RP11-326C3.1 | -0,145093834 | -0,355539428 | 0 | N.A. | 0 |
| EIF2B5-AS1   | -0,145137607 | 0,022452701  | 0 | N.A. | 0 |
| ZNF85        | -0,145268984 | -0,235068607 | 0 | N.A. | 0 |
| POLRMT       | -0,145349449 | -0,070095175 | 0 | N.A. | 0 |
| MED11        | -0,145386717 | -0,312667696 | 0 | N.A. | 0 |
| SMPD2        | -0,145437254 | -0,008153443 | 0 | N.A. | 0 |
| GTF2H2C      | -0,145458263 | 0,161315407  | 0 | N.A. | 0 |
| MTERF4       | -0,145461842 | 0,038672986  | 0 | N.A. | 0 |
| RP11-110I1.1 | -0,145471302 | 0,086521979  | 0 | N.A. | 0 |
| LEFTY1       | -0,145474824 | -0,186553648 | 0 | N.A. | 0 |
| ZC3H12B      | -0,145514071 | -0,108954124 | 0 | N.A. | 0 |

|             |              |              |   |      |   |
|-------------|--------------|--------------|---|------|---|
| LINC01550   | -0,145540162 | -0,149476725 | 0 | N.A. | 0 |
| LINC01132   | -0,145543604 |              | 0 | N.A. | 0 |
| PRR34       | -0,145586134 | -0,074355979 | 0 | N.A. | 0 |
| FHIT        | -0,145669461 | -0,226471784 | 0 | N.A. | 0 |
| ITFG2       | -0,145694809 | -0,108428377 | 0 | N.A. | 0 |
| SEC23IP     | -0,145820825 | 0,022766411  | 0 | N.A. | 0 |
| TUT1        | -0,145839674 | 0,120058579  | 0 | N.A. | 0 |
| POLI        | -0,145847126 | 0,176811642  | 0 | N.A. | 0 |
| IGF2-AS     | -0,145865021 |              | 0 | N.A. | 0 |
| RP11-324E6. | -0,145925358 | -0,009499833 | 0 | N.A. | 0 |
| DPYSL3      | -0,145940321 | -0,078798167 | 0 | N.A. | 0 |
| SMAD1       | -0,145943401 | 0,025037254  | 0 | N.A. | 0 |
| RP11-573G6. | -0,146052776 |              | 0 | N.A. | 0 |
| ZKSCAN5     | -0,146055887 | -0,398196739 | 0 | N.A. | 0 |
| CCDC96      | -0,146065649 | 0,052723974  | 0 | N.A. | 0 |
| RORA-AS1    | -0,146070021 | -0,051848828 | 0 | N.A. | 0 |
| SLC16A1-AS1 | -0,146071503 | 0,009824849  | 0 | N.A. | 0 |
| C10orf95    | -0,146334476 | -0,05230672  | 0 | N.A. | 0 |
| RP11-61K9.3 | -0,146442569 | -0,047961659 | 0 | N.A. | 0 |
| ARHGAP33    | -0,14645237  | 0,10132612   | 0 | N.A. | 0 |
| KDM2B       | -0,14645552  | -0,08176085  | 0 | N.A. | 0 |
| DHX37       | -0,146593112 | -0,144099056 | 0 | N.A. | 0 |
| ZNF446      | -0,146605303 | 0,086338072  | 0 | N.A. | 0 |
| IRAK1       | -0,146660422 | 0,345203981  | 0 | N.A. | 0 |
| GPN2        | -0,146756543 | -0,080518339 | 0 | N.A. | 0 |
| KCTD14      | -0,146872015 | -0,231757449 | 0 | N.A. | 0 |
| MYH13       | -0,146898027 |              | 0 | N.A. | 0 |
| RP11-872J21 | -0,14691904  | 0,076348545  | 0 | N.A. | 0 |
| KANK1       | -0,146985397 | -0,27241551  | 0 | N.A. | 0 |
| MAFG-AS1    | -0,147014378 | -0,119581467 | 0 | N.A. | 0 |
| CCND2       | -0,147025185 | 0,041400324  | 0 | N.A. | 0 |
| GPR85       | -0,147031063 | 0,309070572  | 0 | N.A. | 0 |
| C1orf110    | -0,147040842 |              | 0 | N.A. | 0 |

|             |              |              |   |      |   |
|-------------|--------------|--------------|---|------|---|
| TAF7L       | -0,147050436 | 0,013501112  | 0 | N.A. | 0 |
| UBP1        | -0,147056224 | 0,046256992  | 0 | N.A. | 0 |
| SLC26A8     | -0,147146101 | -0,097738443 | 0 | N.A. | 0 |
| DENND2D     | -0,147151317 | -0,124702878 | 0 | N.A. | 0 |
| AC005307.1  | -0,14717877  | -0,248705759 | 0 | N.A. | 0 |
| NIFK-AS1    | -0,147185188 | 0,125458365  | 0 | N.A. | 0 |
| ZNF43       | -0,147206554 | 0,157971074  | 0 | N.A. | 0 |
| NINJ2       | -0,147247133 | -0,105196017 | 0 | N.A. | 0 |
| MT3         | -0,14725281  | -0,27431172  | 0 | N.A. | 0 |
| DNAH10      | -0,147256313 | 0,084979714  | 0 | N.A. | 0 |
| NSUN6       | -0,147269091 | -0,037261512 | 0 | N.A. | 0 |
| MED20       | -0,147368545 | 0,123805587  | 0 | N.A. | 0 |
| POU5F1B     | -0,147404742 | -0,2525191   | 0 | N.A. | 0 |
| SAMD3       | -0,147469319 | -0,111201167 | 0 | N.A. | 0 |
| BAHCC1      | -0,147507242 | -0,183081643 | 0 | N.A. | 0 |
| DYNLL1-AS1  | -0,147612552 | 0,020588446  | 0 | N.A. | 0 |
| COL2A1      | -0,147639312 | 0,057332223  | 0 | N.A. | 0 |
| LINC01116   | -0,147712172 | -0,08574458  | 0 | N.A. | 0 |
| TEX2        | -0,147712826 | 0,007786672  | 0 | N.A. | 0 |
| TOR2A       | -0,147768193 | -0,085709736 | 0 | N.A. | 0 |
| AC018890.6  | -0,147808207 |              | 0 | N.A. | 0 |
| RP11-394B2. | -0,147917785 | 0,011912371  | 0 | N.A. | 0 |
| C19orf25    | -0,147942398 | 0,212213892  | 0 | N.A. | 0 |
| CFH         | -0,147972723 | 0,135239042  | 0 | N.A. | 0 |
| IFT122      | -0,147975143 | -0,08714326  | 0 | N.A. | 0 |
| TMEM19      | -0,147994814 | -0,1423572   | 0 | N.A. | 0 |
| SIT1        | -0,148104663 | -0,054592829 | 0 | N.A. | 0 |
| SPATA2      | -0,148306228 | 0,01399784   | 0 | N.A. | 0 |
| C2CD4D      | -0,148346082 | -0,008720564 | 0 | N.A. | 0 |
| CXCL13      | -0,148393054 | 0,119791062  | 0 | N.A. | 0 |
| RP11-178L8. | -0,148417726 | 0,070474217  | 0 | N.A. | 0 |
| VAV3        | -0,148555634 | -0,412408916 | 0 | N.A. | 0 |
| RP11-545E17 | -0,148584848 | -0,0316898   | 0 | N.A. | 0 |

|             |              |              |   |      |   |
|-------------|--------------|--------------|---|------|---|
| HIST1H3B    | -0,148630737 | -0,407449669 | 0 | N.A. | 0 |
| ZNF414      | -0,148711663 | -0,074233031 | 0 | N.A. | 0 |
| CSRP2       | -0,148782696 | -0,11895873  | 0 | N.A. | 0 |
| TMEM161B    | -0,14886932  | 0,021709174  | 0 | N.A. | 0 |
| CCDC101     | -0,148880181 | -0,085183613 | 0 | N.A. | 0 |
| ANKRD13B    | -0,148929175 | -0,132337873 | 0 | N.A. | 0 |
| SMIM7       | -0,148933706 | 0,047857484  | 0 | N.A. | 0 |
| NANOS3      | -0,148953977 | -0,144160983 | 0 | N.A. | 0 |
| CLCC1       | -0,148961244 | -0,066710106 | 0 | N.A. | 0 |
| PDIA4       | -0,149048748 | 0,055459361  | 0 | N.A. | 0 |
| KLK12       | -0,149084295 | -0,01600082  | 0 | N.A. | 0 |
| CDHR1       | -0,149216928 | -0,085605109 | 0 | N.A. | 0 |
| DHX40       | -0,14922583  | -0,063740566 | 0 | N.A. | 0 |
| SUZ12       | -0,149264392 | 0,023016818  | 0 | N.A. | 0 |
| OLFML2B     | -0,149328294 | 0,018482093  | 0 | N.A. | 0 |
| VIPR2       | -0,149385366 | 0,141741995  | 0 | N.A. | 0 |
| C17orf97    | -0,149500006 | -0,158914512 | 0 | N.A. | 0 |
| INTS2       | -0,149516961 | -0,05753274  | 0 | N.A. | 0 |
| PTPRD       | -0,14952643  | -0,161325648 | 0 | N.A. | 0 |
| UGGT2       | -0,149544063 | 0,111340129  | 0 | N.A. | 0 |
| MCF2L-AS1   | -0,149554304 | -0,319111117 | 0 | N.A. | 0 |
| LINC01124   | -0,149576978 | -0,125064762 | 0 | N.A. | 0 |
| RP11-89K10. | -0,149613879 | 0,007366529  | 0 | N.A. | 0 |
| SPRYD7      | -0,149623289 | 0,028099135  | 0 | N.A. | 0 |
| CD7         | -0,149740198 | -0,071420764 | 0 | N.A. | 0 |
| APOC1       | -0,149746485 | -0,33809682  | 0 | N.A. | 0 |
| QSOX2       | -0,149810498 | 0,101303508  | 0 | N.A. | 0 |
| CCDC7       | -0,149817595 | 0,033231954  | 0 | N.A. | 0 |
| LRRC74B     | -0,149826309 |              | 0 | N.A. | 0 |
| GPX7        | -0,149892875 | -0,152112107 | 0 | N.A. | 0 |
| PLCG1       | -0,149901428 | -0,088850941 | 0 | N.A. | 0 |
| IL17A       | -0,149903605 |              | 0 | N.A. | 0 |
| FAM169A     | -0,149980057 | -0,124246407 | 0 | N.A. | 0 |

|              |              |              |   |      |   |
|--------------|--------------|--------------|---|------|---|
| RP11-440D1   | -0,149995763 | -0,326303357 | 0 | N.A. | 0 |
| PEG10        | -0,150014146 | 0,056864792  | 0 | N.A. | 0 |
| RP11-579D7   | -0,150038588 | -0,359293634 | 0 | N.A. | 0 |
| UBAC2-AS1    | -0,150091484 | -0,104989322 | 0 | N.A. | 0 |
| DHX35        | -0,150127686 | -0,253027447 | 0 | N.A. | 0 |
| OR2B6        | -0,150212555 | 0,047964544  | 0 | N.A. | 0 |
| VKORC1       | -0,150279287 | -0,07037885  | 0 | N.A. | 0 |
| ZNF444       | -0,150754011 | -0,159775842 | 0 | N.A. | 0 |
| SERPINI1     | -0,150759004 | -0,037380662 | 0 | N.A. | 0 |
| CCL21        | -0,150799287 | -0,193853282 | 0 | N.A. | 0 |
| PTP4A3       | -0,150812558 | -0,338014875 | 0 | N.A. | 0 |
| UBIAD1       | -0,150900887 | -0,092730181 | 0 | N.A. | 0 |
| MLK4         | -0,150908287 | -0,071705107 | 0 | N.A. | 0 |
| ANKDD1B      | -0,150977014 | -0,054222712 | 0 | N.A. | 0 |
| DCAF16       | -0,151009587 | -0,273279202 | 0 | N.A. | 0 |
| CSPG4        | -0,151053541 | -0,168310646 | 0 | N.A. | 0 |
| MFAP1        | -0,151054942 | 0,070654919  | 0 | N.A. | 0 |
| RP11-318A15  | -0,15107905  | -0,153034203 | 0 | N.A. | 0 |
| RP1-118J21.2 | -0,151107997 | 0,039543115  | 0 | N.A. | 0 |
| KREMEN1      | -0,151122983 | 0,206062712  | 0 | N.A. | 0 |
| CLYBL        | -0,151198986 | -0,165730228 | 0 | N.A. | 0 |
| IGFBP5       | -0,151304922 | -0,120675869 | 0 | N.A. | 0 |
| NINJ1        | -0,151356395 | -0,001611206 | 0 | N.A. | 0 |
| FAM43A       | -0,151397375 | -0,207106339 | 0 | N.A. | 0 |
| ERVK3-1      | -0,15142923  | 0,025453977  | 0 | N.A. | 0 |
| AP3B2        | -0,151473534 |              | 0 | N.A. | 0 |
| MAST1        | -0,151618081 | 0,106123649  | 0 | N.A. | 0 |
| WDR83        | -0,151697862 | 0,025421628  | 0 | N.A. | 0 |
| WDR53        | -0,151706539 | -0,299298366 | 0 | N.A. | 0 |
| C9orf43      | -0,151715225 | -0,058076329 | 0 | N.A. | 0 |
| FAM132B      | -0,151739795 | 0,002685007  | 0 | N.A. | 0 |
| POLR2B       | -0,151799142 | 0,167347778  | 0 | N.A. | 0 |
| C9orf116     | -0,151803328 | -0,476348095 | 0 | N.A. | 0 |

|              |              |              |   |      |   |
|--------------|--------------|--------------|---|------|---|
| MTMR2        | -0,151823758 | -0,276085904 | 0 | N.A. | 0 |
| SEPN1        | -0,151859661 | 0,142259117  | 0 | N.A. | 0 |
| PKD2         | -0,152025685 | -0,038010388 | 0 | N.A. | 0 |
| CTHRC1       | -0,152090113 | -0,070426379 | 0 | N.A. | 0 |
| VAMP7        | -0,152108462 | 0,023602321  | 0 | N.A. | 0 |
| RP4-803J11.2 | -0,152116281 | 0,043667932  | 0 | N.A. | 0 |
| HNRNPL       | -0,15214054  | -0,022610537 | 0 | N.A. | 0 |
| PSTPIP2      | -0,152154901 | -0,172400647 | 0 | N.A. | 0 |
| EMC1         | -0,152155532 | -0,020666985 | 0 | N.A. | 0 |
| CTC-260E6.6  | -0,152187957 | -0,057716874 | 0 | N.A. | 0 |
| ZNF230       | -0,152285215 | -0,029920885 | 0 | N.A. | 0 |
| REEP2        | -0,152492444 |              | 0 | N.A. | 0 |
| PAXBP1       | -0,152521132 | -0,046906644 | 0 | N.A. | 0 |
| ZNF534       | -0,15254687  | 0,0117763    | 0 | N.A. | 0 |
| MUTYH        | -0,152583986 | -0,183918634 | 0 | N.A. | 0 |
| XKRX         | -0,152634387 | -0,087660232 | 0 | N.A. | 0 |
| ACY1         | -0,152636674 | 0,109262572  | 0 | N.A. | 0 |
| RP11-795F19  | -0,152716635 |              | 0 | N.A. | 0 |
| RPP14        | -0,152723841 | -0,151004627 | 0 | N.A. | 0 |
| DDX41        | -0,152772092 | -0,287715962 | 0 | N.A. | 0 |
| LOXL3        | -0,152854025 | -0,110000663 | 0 | N.A. | 0 |
| TRIM44       | -0,152862253 | 0,126326613  | 0 | N.A. | 0 |
| RER1         | -0,152954873 | 0,347742211  | 0 | N.A. | 0 |
| HEY2         | -0,153000341 |              | 0 | N.A. | 0 |
| NRG2         | -0,153043734 |              | 0 | N.A. | 0 |
| HOXC4        | -0,153051238 |              | 0 | N.A. | 0 |
| SH2D2A       | -0,153064975 | -0,328739523 | 0 | N.A. | 0 |
| RAB29        | -0,153252889 | -0,283829946 | 0 | N.A. | 0 |
| ZDHH6        | -0,153282751 | -0,140119527 | 0 | N.A. | 0 |
| KIAA1429     | -0,153331519 | 0,25177224   | 0 | N.A. | 0 |
| SCPEP1       | -0,153442808 | 0,057069365  | 0 | N.A. | 0 |
| GAS2         | -0,153528089 | 0,047875156  | 0 | N.A. | 0 |
| IL33         | -0,153602953 | -0,21443964  | 0 | N.A. | 0 |



|             |              |              |   |      |   |
|-------------|--------------|--------------|---|------|---|
| GALNT9      | -0,15370802  | -0,316585055 | 0 | N.A. | 0 |
| PDS5B       | -0,153732157 | 0,191865234  | 0 | N.A. | 0 |
| CBX8        | -0,153777099 | -0,319435118 | 0 | N.A. | 0 |
| BRF2        | -0,153832505 | -0,057236486 | 0 | N.A. | 0 |
| LINC01424   | -0,153844709 |              | 0 | N.A. | 0 |
| RP11-140I16 | -0,153914754 | 0,089930239  | 0 | N.A. | 0 |
| RP11-66N11. | -0,15411292  | 0,076524851  | 0 | N.A. | 0 |
| RP5-1065J22 | -0,154113305 | -0,057131479 | 0 | N.A. | 0 |
| EID1        | -0,154272211 | -0,234714751 | 0 | N.A. | 0 |
| FNTA        | -0,154394923 | -0,163709545 | 0 | N.A. | 0 |
| TRIM13      | -0,154420242 | -0,053748136 | 0 | N.A. | 0 |
| SEC11C      | -0,154451332 | -0,064688862 | 0 | N.A. | 0 |
| C10orf126   | -0,154573881 |              | 0 | N.A. | 0 |
| RP5-968P14. | -0,154576259 | 0,025527421  | 0 | N.A. | 0 |
| RITA1       | -0,154600348 | -0,207216766 | 0 | N.A. | 0 |
| TCEA3       | -0,154601253 | -0,127444528 | 0 | N.A. | 0 |
| AGK         | -0,154767367 | -0,350395871 | 0 | N.A. | 0 |
| AC093627.9  | -0,154770417 | 0,17785496   | 0 | N.A. | 0 |
| CTD-2369P2. | -0,154781572 | 0,330854972  | 0 | N.A. | 0 |
| SPINK4      | -0,154906991 | -0,175864494 | 0 | N.A. | 0 |
| ZRSR2       | -0,154992337 | -0,143310079 | 0 | N.A. | 0 |
| CDK11B      | -0,155047489 | 0,329786732  | 0 | N.A. | 0 |
| GFI1B       | -0,155100696 | -0,202862785 | 0 | N.A. | 0 |
| FTSJ1       | -0,155117218 | -0,013473547 | 0 | N.A. | 0 |
| DNAJC17     | -0,155120827 | 0,307233122  | 0 | N.A. | 0 |
| HS6ST2      | -0,155181382 | -0,050171265 | 0 | N.A. | 0 |
| CPN1        | -0,155225612 |              | 0 | N.A. | 0 |
| ZNF3        | -0,155229467 | 0,002233075  | 0 | N.A. | 0 |
| VPRBP       | -0,155232974 | -0,153540721 | 0 | N.A. | 0 |
| CALM3       | -0,155331388 | -0,219091465 | 0 | N.A. | 0 |
| FKBP1A      | -0,155425924 | -0,402058575 | 0 | N.A. | 0 |
| CPSF1       | -0,155465053 | 0,004274577  | 0 | N.A. | 0 |
| CTB-12904.1 | -0,155514095 | -0,271008574 | 0 | N.A. | 0 |

|              |              |              |   |      |   |
|--------------|--------------|--------------|---|------|---|
| CTC-537E7.2  | -0,155516312 | -0,126723606 | 0 | N.A. | 0 |
| RP11-390F4.4 | -0,155516675 |              | 0 | N.A. | 0 |
| BZRAP1-AS1   | -0,155518858 | 0,033785924  | 0 | N.A. | 0 |
| AC007386.4   | -0,15557468  | -0,147354978 | 0 | N.A. | 0 |
| ACOT2        | -0,155577878 | -0,071295483 | 0 | N.A. | 0 |
| RP11-727F15  | -0,155854647 | 0,105352709  | 0 | N.A. | 0 |
| RP11-61J19.5 | -0,155929428 | -0,121887754 | 0 | N.A. | 0 |
| FAM27C       | -0,155953351 | -0,053333811 | 0 | N.A. | 0 |
| OLR1         | -0,156071752 | -0,310446633 | 0 | N.A. | 0 |
| APH1A        | -0,156077201 | -0,015158689 | 0 | N.A. | 0 |
| FITM2        | -0,15608421  | -0,18150842  | 0 | N.A. | 0 |
| IGHV3-30     | -0,156191029 |              | 0 | N.A. | 0 |
| GPR180       | -0,156206646 | 0,121529837  | 0 | N.A. | 0 |
| C1orf216     | -0,156259914 | -0,285367123 | 0 | N.A. | 0 |
| MTHFSD       | -0,156271071 | -0,146600594 | 0 | N.A. | 0 |
| PARG         | -0,156301083 | 0,233225558  | 0 | N.A. | 0 |
| RAB8A        | -0,156317548 | 0,013125021  | 0 | N.A. | 0 |
| POLL         | -0,156433067 | -0,233516777 | 0 | N.A. | 0 |
| KAT5         | -0,15646768  | -0,023231163 | 0 | N.A. | 0 |
| CTB-55O6.8   | -0,156474038 | 0,011276509  | 0 | N.A. | 0 |
| GRM1         | -0,156519619 |              | 0 | N.A. | 0 |
| ALKBH1       | -0,156705392 | -0,20739138  | 0 | N.A. | 0 |
| IQCG         | -0,156815926 | 0,124625819  | 0 | N.A. | 0 |
| PKN2-AS1     | -0,156886388 | 0,070821212  | 0 | N.A. | 0 |
| RGS13        | -0,15688914  | -0,214203215 | 0 | N.A. | 0 |
| SF3B1        | -0,157011458 | 0,025029085  | 0 | N.A. | 0 |
| PSAT1        | -0,157088855 | -0,1166236   | 0 | N.A. | 0 |
| ZNF689       | -0,157089703 | -0,098165958 | 0 | N.A. | 0 |
| SLC25A51     | -0,157230735 | -0,312855653 | 0 | N.A. | 0 |
| AKR1B1       | -0,157231718 | -0,163545187 | 0 | N.A. | 0 |
| RP11-95P2.3  | -0,157400825 | 0,003265002  | 0 | N.A. | 0 |
| RFESD        | -0,15746815  | -0,111827546 | 0 | N.A. | 0 |
| TMEM255B     | -0,157482187 | -0,301326991 | 0 | N.A. | 0 |

|              |              |              |   |      |   |
|--------------|--------------|--------------|---|------|---|
| GNAS-AS1     | -0,157485316 |              | 0 | N.A. | 0 |
| CRYL1        | -0,157549998 | 0,0620927    | 0 | N.A. | 0 |
| ZDHC24       | -0,157556424 | 0,074372867  | 0 | N.A. | 0 |
| PIK3R1       | -0,157595041 | -0,047128879 | 0 | N.A. | 0 |
| CMTM7        | -0,157663227 | -0,064011834 | 0 | N.A. | 0 |
| IGFBPL1      | -0,157670305 |              | 0 | N.A. | 0 |
| POFUT1       | -0,157674692 | -0,153322188 | 0 | N.A. | 0 |
| CXXC1        | -0,157702614 | -0,032334271 | 0 | N.A. | 0 |
| TRDMT1       | -0,157723395 | 0,014670624  | 0 | N.A. | 0 |
| APOPT1       | -0,157744831 | -0,014076507 | 0 | N.A. | 0 |
| TAF1D        | -0,157798001 | -0,153605901 | 0 | N.A. | 0 |
| ZCCHC9       | -0,157845007 | -0,133113229 | 0 | N.A. | 0 |
| KRTAP5-2     | -0,157900275 | 0,43059688   | 0 | N.A. | 0 |
| TMEM147-AS1  | -0,158088341 | -0,125310508 | 0 | N.A. | 0 |
| TMEM254-AS1  | -0,158196952 | -0,229615583 | 0 | N.A. | 0 |
| C1orf233     | -0,158245979 | -0,073572011 | 0 | N.A. | 0 |
| RAB2A        | -0,158321365 | 0,070918468  | 0 | N.A. | 0 |
| ARHGAP22     | -0,158333133 | -0,038055842 | 0 | N.A. | 0 |
| ACOX2        | -0,158379121 | -0,293593474 | 0 | N.A. | 0 |
| HYLS1        | -0,158414106 | -0,44206608  | 0 | N.A. | 0 |
| PRRT1        | -0,158420337 | -0,068080845 | 0 | N.A. | 0 |
| CEBPA-AS1    | -0,1584409   | -0,260637944 | 0 | N.A. | 0 |
| TAF6L        | -0,158454514 | 0,064426459  | 0 | N.A. | 0 |
| CTD-2576D5   | -0,158465165 | -0,079572355 | 0 | N.A. | 0 |
| ASB13        | -0,158581966 | 0,291966051  | 0 | N.A. | 0 |
| AC004540.5   | -0,158631255 | 0,45824634   | 0 | N.A. | 0 |
| NOL9         | -0,158651748 | 0,095111262  | 0 | N.A. | 0 |
| IL20RA       | -0,158671698 | 0,166091707  | 0 | N.A. | 0 |
| LY6G6D       | -0,158697519 | -0,144267912 | 0 | N.A. | 0 |
| SLC6A16      | -0,158841626 | 0,002401309  | 0 | N.A. | 0 |
| CTD-2385L22  | -0,158985747 | 0,10286675   | 0 | N.A. | 0 |
| RP11-290F5.1 | -0,159056152 |              | 0 | N.A. | 0 |
| CD3G         | -0,15909308  | -0,136066519 | 0 | N.A. | 0 |

|              |              |              |   |      |   |
|--------------|--------------|--------------|---|------|---|
| AKAP1        | -0,159096477 | 0,187655779  | 0 | N.A. | 0 |
| PMFBP1       | -0,159101866 | -0,205736979 | 0 | N.A. | 0 |
| TUBGCP5      | -0,159106028 | -0,166227594 | 0 | N.A. | 0 |
| PROSER1      | -0,159172784 | -0,033990961 | 0 | N.A. | 0 |
| SCYL3        | -0,159263781 | 0,12086445   | 0 | N.A. | 0 |
| MNX1         | -0,159380234 | -0,221044057 | 0 | N.A. | 0 |
| RLBP1        | -0,159410606 | 0,091445652  | 0 | N.A. | 0 |
| RP11-108M1   | -0,159507292 | 0,070519134  | 0 | N.A. | 0 |
| RP11-85A1.3  | -0,159569016 | -0,022825176 | 0 | N.A. | 0 |
| KIAA0141     | -0,159659156 | -0,156759187 | 0 | N.A. | 0 |
| NANP         | -0,159698111 | -0,112541043 | 0 | N.A. | 0 |
| TFR2         | -0,159732436 | 0,120861773  | 0 | N.A. | 0 |
| PARN         | -0,159767897 | 0,062544736  | 0 | N.A. | 0 |
| RP11-712L6.1 | -0,159806707 | -0,019659996 | 0 | N.A. | 0 |
| ZBED5-AS1    | -0,159917933 | -0,290304835 | 0 | N.A. | 0 |
| RP11-977G19  | -0,159987694 | -0,221545561 | 0 | N.A. | 0 |
| AKR1E2       | -0,160046112 | -0,300796705 | 0 | N.A. | 0 |
| COMMD1       | -0,160066393 | -0,005282946 | 0 | N.A. | 0 |
| ACOT13       | -0,160118882 | -0,012541348 | 0 | N.A. | 0 |
| RP11-46J23.1 | -0,160143404 | 0,15299895   | 0 | N.A. | 0 |
| PKI55        | -0,160151686 | 0,349315519  | 0 | N.A. | 0 |
| ZFP37        | -0,160167198 | -0,349190209 | 0 | N.A. | 0 |
| ZFP64        | -0,16017253  | -0,090260331 | 0 | N.A. | 0 |
| ZC2HC1C      | -0,160206466 | -0,077647582 | 0 | N.A. | 0 |
| RP11-334G22  | -0,160440378 |              | 0 | N.A. | 0 |
| PSMB10       | -0,160493055 | -0,215475393 | 0 | N.A. | 0 |
| ACADS        | -0,160515213 | 0,107433464  | 0 | N.A. | 0 |
| NOL6         | -0,160580397 | 0,015530469  | 0 | N.A. | 0 |
| CLRN3        | -0,160596687 | 0,136582046  | 0 | N.A. | 0 |
| RP11-126L15  | -0,160626345 | -0,173459336 | 0 | N.A. | 0 |
| TAB1         | -0,160783041 | -0,06132588  | 0 | N.A. | 0 |
| RP4-635E18.1 | -0,16085916  | 0,305975354  | 0 | N.A. | 0 |
| C10orf35     | -0,160873417 | 0,0744596    | 0 | N.A. | 0 |

|             |              |              |   |      |   |
|-------------|--------------|--------------|---|------|---|
| FBXL15      | -0,161000921 | 0,051998597  | 0 | N.A. | 0 |
| APOA2       | -0,161167532 |              | 0 | N.A. | 0 |
| TCP10L      | -0,161263176 | -0,171763086 | 0 | N.A. | 0 |
| COMMD6      | -0,161356358 | -0,352441488 | 0 | N.A. | 0 |
| FOXJ1       | -0,161358871 | -0,206668942 | 0 | N.A. | 0 |
| RP11-629B11 | -0,161399425 | -0,078181016 | 0 | N.A. | 0 |
| AC002550.6  | -0,161473407 |              | 0 | N.A. | 0 |
| RAD9B       | -0,161474065 | -0,148035039 | 0 | N.A. | 0 |
| ZNF675      | -0,161531116 | 0,18344006   | 0 | N.A. | 0 |
| CAMLG       | -0,161551533 | -0,271364062 | 0 | N.A. | 0 |
| MTHFD2      | -0,16157931  | -0,314805289 | 0 | N.A. | 0 |
| ARMC9       | -0,161618893 | -0,095747518 | 0 | N.A. | 0 |
| CTSV        | -0,16167352  | 0,290233004  | 0 | N.A. | 0 |
| FAM3B       | -0,161746144 | -0,198674055 | 0 | N.A. | 0 |
| DGKG        | -0,161779456 | -0,178083699 | 0 | N.A. | 0 |
| SIRT5       | -0,161807259 | 0,005638187  | 0 | N.A. | 0 |
| ZNF24       | -0,161808259 | 0,097152205  | 0 | N.A. | 0 |
| RP11-196G18 | -0,161876123 | 0,075626721  | 0 | N.A. | 0 |
| GALK2       | -0,162007264 | 0,125223643  | 0 | N.A. | 0 |
| ART3        | -0,162110116 | 0,025682937  | 0 | N.A. | 0 |
| ERMARD      | -0,162146791 | -0,216118169 | 0 | N.A. | 0 |
| LPCAT3      | -0,162221943 | 0,078125682  | 0 | N.A. | 0 |
| FPGS        | -0,162242824 | 0,275381849  | 0 | N.A. | 0 |
| MT1X        | -0,16224831  | -0,069330437 | 0 | N.A. | 0 |
| L3HYPDH     | -0,162367142 | -0,092912688 | 0 | N.A. | 0 |
| C21orf2     | -0,162387088 | -0,177291446 | 0 | N.A. | 0 |
| KIN         | -0,162416118 | 0,141385851  | 0 | N.A. | 0 |
| CAPS2       | -0,162450447 | -0,038191838 | 0 | N.A. | 0 |
| ST6GAL1     | -0,162550934 | 0,071336743  | 0 | N.A. | 0 |
| CPT2        | -0,162764442 | -0,343631397 | 0 | N.A. | 0 |
| NPL         | -0,162852761 | 0,045296935  | 0 | N.A. | 0 |
| MFAP2       | -0,162895651 | 0,261512846  | 0 | N.A. | 0 |
| CXorf40A    | -0,162938351 | -0,230870592 | 0 | N.A. | 0 |

|             |              |              |   |      |   |
|-------------|--------------|--------------|---|------|---|
| STARD4-AS1  | -0,163046315 | -0,117727341 | 0 | N.A. | 0 |
| RABL6       | -0,163051467 | 0,1475489    | 0 | N.A. | 0 |
| DHX34       | -0,163083451 | -0,082907017 | 0 | N.A. | 0 |
| RP1-309F20. | -0,163111686 | -0,253052051 | 0 | N.A. | 0 |
| FTL         | -0,163142406 | -0,436121532 | 0 | N.A. | 0 |
| FANCC       | -0,163204868 | -0,195081118 | 0 | N.A. | 0 |
| CTD-2369P2. | -0,163330684 | -0,020127534 | 0 | N.A. | 0 |
| HCG20       | -0,163353937 | 0,257466207  | 0 | N.A. | 0 |
| RP5-827C21. | -0,163385382 | -0,021142174 | 0 | N.A. | 0 |
| ALKBH6      | -0,163438803 | -0,094071871 | 0 | N.A. | 0 |
| FAM118B     | -0,163449055 | -0,162603143 | 0 | N.A. | 0 |
| ARIH2       | -0,163520641 | -0,100858657 | 0 | N.A. | 0 |
| RP5-1092A3. | -0,163522588 | 0,043490561  | 0 | N.A. | 0 |
| ANKRD16     | -0,163643244 | 0,17610524   | 0 | N.A. | 0 |
| NBEAL1      | -0,163650367 | -0,481196969 | 0 | N.A. | 0 |
| SRPX        | -0,163810277 | -0,016939361 | 0 | N.A. | 0 |
| PRKRIR      | -0,163989624 | -0,127368191 | 0 | N.A. | 0 |
| SRPK2       | -0,164116955 | -0,096630927 | 0 | N.A. | 0 |
| DHCR7       | -0,164218487 | 0,179671493  | 0 | N.A. | 0 |
| RAMP2       | -0,164242577 | -0,190722494 | 0 | N.A. | 0 |
| CDKAL1      | -0,164369382 | -0,156172744 | 0 | N.A. | 0 |
| C10orf131   | -0,164455406 |              | 0 | N.A. | 0 |
| AC021224.1  | -0,164480433 | -0,046556194 | 0 | N.A. | 0 |
| CLPTM1      | -0,164493208 | 0,370967654  | 0 | N.A. | 0 |
| ZP3         | -0,164503226 | -0,232392597 | 0 | N.A. | 0 |
| C3orf14     | -0,1645082   | -0,468160382 | 0 | N.A. | 0 |
| C2CD5       | -0,164621766 | -0,196743453 | 0 | N.A. | 0 |
| KTN1-AS1    | -0,164642819 | -0,291001964 | 0 | N.A. | 0 |
| DBR1        | -0,164685926 | -0,221655549 | 0 | N.A. | 0 |
| HEMK1       | -0,164689643 | -0,097320126 | 0 | N.A. | 0 |
| PTGR2       | -0,164734475 | -0,051551543 | 0 | N.A. | 0 |
| RP11-410L14 | -0,164883952 | -0,294565276 | 0 | N.A. | 0 |
| EPB41L2     | -0,164900555 | 0,2187165    | 0 | N.A. | 0 |

|             |              |              |   |      |   |
|-------------|--------------|--------------|---|------|---|
| ZCCHC4      | -0,164931704 | 0,080005157  | 0 | N.A. | 0 |
| DNAH11      | -0,164939594 | -0,254885052 | 0 | N.A. | 0 |
| RXFP4       | -0,164977464 | -0,116084944 | 0 | N.A. | 0 |
| RBM26       | -0,164978022 | 0,289963465  | 0 | N.A. | 0 |
| NCKAP1L     | -0,164987392 | -0,227373497 | 0 | N.A. | 0 |
| FIBCD1      | -0,165000125 | -0,040591595 | 0 | N.A. | 0 |
| NEK1        | -0,16504524  | -0,384606959 | 0 | N.A. | 0 |
| ZNF81       | -0,165106829 | 0,092577293  | 0 | N.A. | 0 |
| RP11-57A19. | -0,165112363 |              | 0 | N.A. | 0 |
| SMARCD1     | -0,165140769 | -0,165312    | 0 | N.A. | 0 |
| ASTN2       | -0,165213096 | -0,249459477 | 0 | N.A. | 0 |
| HIF1AN      | -0,165219974 | -0,062114771 | 0 | N.A. | 0 |
| VSTM2B      | -0,165220554 | -0,234592937 | 0 | N.A. | 0 |
| DKFZp434P2  | -0,165247364 | -0,111262731 | 0 | N.A. | 0 |
| TTI2        | -0,165350718 | -0,254565078 | 0 | N.A. | 0 |
| ELAVL2      | -0,165371572 | -0,032119701 | 0 | N.A. | 0 |
| CYP2J2      | -0,165377077 | 0,114717603  | 0 | N.A. | 0 |
| CANX        | -0,165419933 | 0,069288956  | 0 | N.A. | 0 |
| ITPRIPL1    | -0,165466784 |              | 0 | N.A. | 0 |
| FAM175A     | -0,165665091 | -0,304761312 | 0 | N.A. | 0 |
| AL450992.2  | -0,165690745 |              | 0 | N.A. | 0 |
| LINC00115   | -0,16573394  | 0,009126935  | 0 | N.A. | 0 |
| APOH        | -0,165770895 | -0,168270417 | 0 | N.A. | 0 |
| RBP4        | -0,165779207 | 0,110134487  | 0 | N.A. | 0 |
| DLL1        | -0,165791851 | 0,072100903  | 0 | N.A. | 0 |
| FAM117B     | -0,165855818 | -0,247902789 | 0 | N.A. | 0 |
| CUL2        | -0,165980774 | 0,142533534  | 0 | N.A. | 0 |
| EGFL6       | -0,166003421 |              | 0 | N.A. | 0 |
| CCDC127     | -0,16614903  | 0,200873204  | 0 | N.A. | 0 |
| CXCL12      | -0,166213568 | -0,145520751 | 0 | N.A. | 0 |
| CCAR2       | -0,166262034 | -0,270866848 | 0 | N.A. | 0 |
| RP1-223E5.4 | -0,166286441 | -0,057118166 | 0 | N.A. | 0 |
| CD3E        | -0,166313101 | -0,252677645 | 0 | N.A. | 0 |

|              |              |              |   |      |   |
|--------------|--------------|--------------|---|------|---|
| PDGFRA       | -0,166314231 | 0,260807931  | 0 | N.A. | 0 |
| USP7         | -0,166405114 | 0,147132485  | 0 | N.A. | 0 |
| SLC13A3      | -0,166449256 | -0,150716598 | 0 | N.A. | 0 |
| RP11-277B15  | -0,166450654 | 0,193007467  | 0 | N.A. | 0 |
| CPA6         | -0,166608197 | -0,348071273 | 0 | N.A. | 0 |
| TMEM107      | -0,166770759 | -0,184364848 | 0 | N.A. | 0 |
| MSANTD4      | -0,166801278 | 0,004092459  | 0 | N.A. | 0 |
| TET1         | -0,1669617   | -0,261673463 | 0 | N.A. | 0 |
| PLCB4        | -0,166964035 | -0,096281468 | 0 | N.A. | 0 |
| ZNF830       | -0,167041024 | 0,062691792  | 0 | N.A. | 0 |
| CCDC14       | -0,167106701 | 0,155474549  | 0 | N.A. | 0 |
| EPN3         | -0,167107235 | 0,193736829  | 0 | N.A. | 0 |
| RP6-109B7.5  | -0,167190558 | -0,256575846 | 0 | N.A. | 0 |
| RP5-1074L1.1 | -0,167236185 | -0,13281901  | 0 | N.A. | 0 |
| RGS10        | -0,167258876 | -0,414201044 | 0 | N.A. | 0 |
| PKM          | -0,167281583 | 0,281063891  | 0 | N.A. | 0 |
| AHI1         | -0,167440576 | 0,118614132  | 0 | N.A. | 0 |
| RANBP3       | -0,167476134 | -0,172844924 | 0 | N.A. | 0 |
| TAZ          | -0,167484295 | 0,218449597  | 0 | N.A. | 0 |
| CCDC15       | -0,167496444 | -0,02229236  | 0 | N.A. | 0 |
| FBXW2        | -0,167506415 | 0,187609712  | 0 | N.A. | 0 |
| STX18        | -0,167536053 | 0,226426759  | 0 | N.A. | 0 |
| NOTCH1       | -0,167537271 | -0,095955594 | 0 | N.A. | 0 |
| TDO2         | -0,167559308 | -0,214650853 | 0 | N.A. | 0 |
| ATRX         | -0,167563103 | 0,214164149  | 0 | N.A. | 0 |
| LINC00094    | -0,167577603 | -0,325401748 | 0 | N.A. | 0 |
| GPC3         | -0,16767624  | -0,12670222  | 0 | N.A. | 0 |
| N6AMT1       | -0,16767837  | -0,205737745 | 0 | N.A. | 0 |
| ALKBH3       | -0,167740475 | -0,211449156 | 0 | N.A. | 0 |
| RBM22        | -0,167829429 | -0,02797178  | 0 | N.A. | 0 |
| PDE3A        | -0,167870497 | -0,039803172 | 0 | N.A. | 0 |
| TRNAU1AP     | -0,167918339 | 0,253210509  | 0 | N.A. | 0 |
| RP11-498C9.1 | -0,168005066 |              | 0 | N.A. | 0 |



|              |              |              |   |      |   |
|--------------|--------------|--------------|---|------|---|
| SPIDR        | -0,168032506 | 0,066253722  | 0 | N.A. | 0 |
| MORN1        | -0,168088001 | -0,207530037 | 0 | N.A. | 0 |
| TTPA         | -0,168147835 | -0,279907446 | 0 | N.A. | 0 |
| CNDP2        | -0,168204089 | -0,147549147 | 0 | N.A. | 0 |
| TERF2IP      | -0,168255327 | 0,107601866  | 0 | N.A. | 0 |
| KHDC1        | -0,168305343 | -0,145402254 | 0 | N.A. | 0 |
| ZNF90        | -0,168385804 | -0,361244699 | 0 | N.A. | 0 |
| RP11-245J9.5 | -0,168438475 |              | 0 | N.A. | 0 |
| AC104654.2   | -0,168496537 |              | 0 | N.A. | 0 |
| FAM172A      | -0,168539363 | -0,067540045 | 0 | N.A. | 0 |
| SPATA17      | -0,168574885 | -0,216543549 | 0 | N.A. | 0 |
| FGD1         | -0,168577852 |              | 0 | N.A. | 0 |
| TOE1         | -0,168596751 | 0,085994881  | 0 | N.A. | 0 |
| COX10        | -0,168683675 | -0,346631706 | 0 | N.A. | 0 |
| GTF2E2       | -0,168703124 | -0,191476221 | 0 | N.A. | 0 |
| FAM35A       | -0,168784151 | -0,336853146 | 0 | N.A. | 0 |
| ZSCAN21      | -0,168834828 | 0,092760389  | 0 | N.A. | 0 |
| LINC00176    | -0,168836588 | 0,00394554   | 0 | N.A. | 0 |
| RBM4B        | -0,168875775 | -0,23493069  | 0 | N.A. | 0 |
| HSD17B11     | -0,168887686 | 0,103285773  | 0 | N.A. | 0 |
| RP4-680D5.8  | -0,168945649 | -0,329601956 | 0 | N.A. | 0 |
| NUAK2        | -0,168961355 | -0,099860705 | 0 | N.A. | 0 |
| ECM2         | -0,169049674 | -0,303702421 | 0 | N.A. | 0 |
| RP11-498C9.  | -0,169084215 | -0,26392906  | 0 | N.A. | 0 |
| RP11-67M9.1  | -0,169102479 | 0,070361615  | 0 | N.A. | 0 |
| RP11-68L18.  | -0,169254883 |              | 0 | N.A. | 0 |
| WIBG         | -0,169517518 | 0,208929507  | 0 | N.A. | 0 |
| MIP          | -0,169543519 | 0,310619148  | 0 | N.A. | 0 |
| LNP1         | -0,169597083 | 0,018716566  | 0 | N.A. | 0 |
| PCGF1        | -0,169701182 | -0,070540012 | 0 | N.A. | 0 |
| RP11-559M2   | -0,169705089 | 0,076755745  | 0 | N.A. | 0 |
| KLHL8        | -0,169708672 | -0,340595865 | 0 | N.A. | 0 |
| GPR155       | -0,169761159 | 0,052816684  | 0 | N.A. | 0 |

|              |              |              |   |      |   |
|--------------|--------------|--------------|---|------|---|
| IGSF23       | -0,169775723 | 0,133332274  | 0 | N.A. | 0 |
| RP11-251G23  | -0,169786357 | -0,227374614 | 0 | N.A. | 0 |
| RP11-1069G1  | -0,170016496 |              | 0 | N.A. | 0 |
| NAA40        | -0,170027989 | 0,185830276  | 0 | N.A. | 0 |
| LINC00402    | -0,170097707 |              | 0 | N.A. | 0 |
| RNF212       | -0,170102624 | 0,104291894  | 0 | N.A. | 0 |
| TUSC2        | -0,170179974 | -0,29551344  | 0 | N.A. | 0 |
| HOXB4        | -0,170238452 | 0,302804466  | 0 | N.A. | 0 |
| FAM200A      | -0,170282769 | -0,041228068 | 0 | N.A. | 0 |
| ZNF227       | -0,170319089 | -0,226444772 | 0 | N.A. | 0 |
| CAMKK1       | -0,170368352 | 0,16455218   | 0 | N.A. | 0 |
| WIF1         | -0,17044255  |              | 0 | N.A. | 0 |
| RP1-168L15.1 | -0,170694499 | -0,02983824  | 0 | N.A. | 0 |
| RP11-182L21  | -0,170775974 | -0,101788994 | 0 | N.A. | 0 |
| TRAF5        | -0,170794123 | -0,004374033 | 0 | N.A. | 0 |
| CIRBP        | -0,170939467 | 0,119038253  | 0 | N.A. | 0 |
| ISCA2        | -0,170968096 | 0,019498054  | 0 | N.A. | 0 |
| TCTN2        | -0,171029801 | 0,085109125  | 0 | N.A. | 0 |
| PRAME        | -0,171073772 | -0,152261826 | 0 | N.A. | 0 |
| ADCK2        | -0,17110539  | -0,000366649 | 0 | N.A. | 0 |
| AP001505.10  | -0,17111192  | -0,124547571 | 0 | N.A. | 0 |
| C3orf33      | -0,171194395 | -0,095712358 | 0 | N.A. | 0 |
| LINC01234    | -0,171261064 | -0,190150932 | 0 | N.A. | 0 |
| ZNF512B      | -0,171307809 | 0,000427825  | 0 | N.A. | 0 |
| RASL10B      | -0,17133499  |              | 0 | N.A. | 0 |
| SLC30A9      | -0,171340839 | -0,20876916  | 0 | N.A. | 0 |
| SLC4A1AP     | -0,171372325 | -0,004907781 | 0 | N.A. | 0 |
| AP000692.10  | -0,171508802 | 0,329611396  | 0 | N.A. | 0 |
| ANGPTL2      | -0,171510863 | -0,201476516 | 0 | N.A. | 0 |
| SEC14L4      | -0,171550735 |              | 0 | N.A. | 0 |
| TMEM71       | -0,17156215  | -0,072898669 | 0 | N.A. | 0 |
| WT1          | -0,171698432 | -0,314246103 | 0 | N.A. | 0 |
| FAM41C       | -0,171720978 | 0,145183678  | 0 | N.A. | 0 |

|              |              |              |   |      |   |
|--------------|--------------|--------------|---|------|---|
| CLDN15       | -0,171818825 | -0,052353323 | 0 | N.A. | 0 |
| RNF43        | -0,171833911 | 0,082788978  | 0 | N.A. | 0 |
| INSM1        | -0,171939692 |              | 0 | N.A. | 0 |
| TTC21B       | -0,172173062 | -0,045053964 | 0 | N.A. | 0 |
| ATP6AP2      | -0,17225939  | -0,082931665 | 0 | N.A. | 0 |
| PLCB1        | -0,1722696   | -0,003099779 | 0 | N.A. | 0 |
| ARHGEF19     | -0,172275944 | 0,060101798  | 0 | N.A. | 0 |
| LXN          | -0,172396928 | -0,010207922 | 0 | N.A. | 0 |
| SOX14        | -0,172575418 | 0,105004034  | 0 | N.A. | 0 |
| ORM1         | -0,172652479 | -0,055316807 | 0 | N.A. | 0 |
| AC018359.1   | -0,172661219 | -0,211610483 | 0 | N.A. | 0 |
| ZNF286A      | -0,172699449 | -0,121439581 | 0 | N.A. | 0 |
| KMT2E-AS1    | -0,172752304 | 0,087619722  | 0 | N.A. | 0 |
| SPIN3        | -0,172773223 | -0,112211294 | 0 | N.A. | 0 |
| GIN1         | -0,172792458 | -0,115161184 | 0 | N.A. | 0 |
| FSD1L        | -0,172899512 | -0,310359887 | 0 | N.A. | 0 |
| PRCP         | -0,172999141 | -0,207187229 | 0 | N.A. | 0 |
| OXLD1        | -0,173045333 | -0,086282178 | 0 | N.A. | 0 |
| LANCL2       | -0,173151232 | -0,338838148 | 0 | N.A. | 0 |
| PACRGL       | -0,173369704 | -0,320648207 | 0 | N.A. | 0 |
| RP11-863K10  | -0,17344652  |              | 0 | N.A. | 0 |
| THAP1        | -0,173499901 | 0,051458355  | 0 | N.A. | 0 |
| BTG3         | -0,173619285 | -0,125839908 | 0 | N.A. | 0 |
| DDX28        | -0,173661556 | -0,160222538 | 0 | N.A. | 0 |
| BAP1         | -0,173664491 | 0,075141534  | 0 | N.A. | 0 |
| ZC3H14       | -0,173678229 | -0,286186101 | 0 | N.A. | 0 |
| DIXDC1       | -0,173734718 | 0,081159554  | 0 | N.A. | 0 |
| ZNF138       | -0,17374495  | -0,162190905 | 0 | N.A. | 0 |
| SELO         | -0,173822953 | 0,068979396  | 0 | N.A. | 0 |
| FASN         | -0,17395102  | 0,234612821  | 0 | N.A. | 0 |
| CTD-2024I7.1 | -0,174023097 |              | 0 | N.A. | 0 |
| NCLN         | -0,174107067 | 0,20255686   | 0 | N.A. | 0 |
| TUBA3E       | -0,174175897 |              | 0 | N.A. | 0 |

|             |              |              |   |      |   |
|-------------|--------------|--------------|---|------|---|
| SEC61B      | -0,174180724 | -0,206159724 | 0 | N.A. | 0 |
| PRR7-AS1    | -0,174202124 | -0,227703498 | 0 | N.A. | 0 |
| EXOSC10     | -0,174289049 | -0,133198214 | 0 | N.A. | 0 |
| CDK5RAP3    | -0,174371939 | 0,2704897    | 0 | N.A. | 0 |
| MIEN1       | -0,174416005 | -0,197994378 | 0 | N.A. | 0 |
| RP13-753N3. | -0,174437358 | -0,178861536 | 0 | N.A. | 0 |
| MYLK-AS1    | -0,174579129 | -0,287806399 | 0 | N.A. | 0 |
| RP11-91G21. | -0,174735811 | -0,087497985 | 0 | N.A. | 0 |
| CTC-232P5.1 | -0,17475107  |              | 0 | N.A. | 0 |
| RP11-758H9. | -0,174763762 | -0,068044115 | 0 | N.A. | 0 |
| UBE2Q2      | -0,174805209 | -0,165687739 | 0 | N.A. | 0 |
| MSRB2       | -0,17481591  | 0,156900461  | 0 | N.A. | 0 |
| LINC01521   | -0,174850456 | -0,020105997 | 0 | N.A. | 0 |
| ASIC1       | -0,174982623 | -0,09086839  | 0 | N.A. | 0 |
| RNF219      | -0,175100782 | 0,005775544  | 0 | N.A. | 0 |
| CCDC77      | -0,175138173 | -0,044507868 | 0 | N.A. | 0 |
| AACS        | -0,17523426  | -0,147532684 | 0 | N.A. | 0 |
| CMTM6       | -0,175246348 | 0,06721708   | 0 | N.A. | 0 |
| EPT1        | -0,175415848 | -0,040511844 | 0 | N.A. | 0 |
| NADK2       | -0,175493082 | 0,046104497  | 0 | N.A. | 0 |
| PLN         | -0,175681738 | -0,039887399 | 0 | N.A. | 0 |
| TEX9        | -0,175871786 | -0,238380316 | 0 | N.A. | 0 |
| ACTR8       | -0,175889266 | 0,114007696  | 0 | N.A. | 0 |
| RNF135      | -0,175959667 | -0,108903044 | 0 | N.A. | 0 |
| TMEM201     | -0,176048813 | -0,088696233 | 0 | N.A. | 0 |
| GTF2H1      | -0,176049319 | -0,195676547 | 0 | N.A. | 0 |
| RP11-1079K1 | -0,176142336 | -0,025954211 | 0 | N.A. | 0 |
| TTC3        | -0,17629085  | -0,009932801 | 0 | N.A. | 0 |
| ACLY        | -0,176339072 | -0,079326815 | 0 | N.A. | 0 |
| FAM184A     | -0,176402834 |              | 0 | N.A. | 0 |
| CSNK2A1     | -0,176523685 | 0,021220872  | 0 | N.A. | 0 |
| RP11-197K6. | -0,176525209 | -0,343782048 | 0 | N.A. | 0 |
| TRRAP       | -0,176539597 | 0,1112403    | 0 | N.A. | 0 |

|             |              |              |   |      |   |
|-------------|--------------|--------------|---|------|---|
| C2orf43     | -0,176540434 | -0,265083017 | 0 | N.A. | 0 |
| LTK         | -0,176562534 | 0,097106267  | 0 | N.A. | 0 |
| PARD6A      | -0,176567488 | -0,289642279 | 0 | N.A. | 0 |
| NUDT7       | -0,176630833 | -0,368882655 | 0 | N.A. | 0 |
| AC024592.12 | -0,176659978 | -0,033478156 | 0 | N.A. | 0 |
| AMT         | -0,176744573 | -0,020413617 | 0 | N.A. | 0 |
| CWC22       | -0,176754581 | 0,10040566   | 0 | N.A. | 0 |
| SOWAHA      | -0,176757479 | 0,140447372  | 0 | N.A. | 0 |
| RBKS        | -0,176792127 | -0,234309526 | 0 | N.A. | 0 |
| ZNF692      | -0,176840839 | -0,024812754 | 0 | N.A. | 0 |
| DGUOK-AS1   | -0,177077664 | -0,29487939  | 0 | N.A. | 0 |
| GCG         | -0,177078628 | 0,103100628  | 0 | N.A. | 0 |
| DSTN        | -0,17712704  | -0,131787524 | 0 | N.A. | 0 |
| CRBN        | -0,177191576 | -0,11313233  | 0 | N.A. | 0 |
| AMD1        | -0,177199897 | 0,157160641  | 0 | N.A. | 0 |
| SMAD9       | -0,177207729 | -0,146001764 | 0 | N.A. | 0 |
| TBCC        | -0,177220628 | 0,009258682  | 0 | N.A. | 0 |
| POLR3C      | -0,177231928 | 0,070151967  | 0 | N.A. | 0 |
| RP11-177H2. | -0,177404694 | 0,347944736  | 0 | N.A. | 0 |
| TMEM251     | -0,177478888 | -0,250787011 | 0 | N.A. | 0 |
| RAB3A       | -0,177537582 | 0,106303003  | 0 | N.A. | 0 |
| SRI         | -0,177553752 | -0,129624567 | 0 | N.A. | 0 |
| CYB5RL      | -0,177672615 | -0,130202069 | 0 | N.A. | 0 |
| WDR5B       | -0,17777885  | -0,161096024 | 0 | N.A. | 0 |
| PRIMPOL     | -0,177844745 | -0,179057837 | 0 | N.A. | 0 |
| SEPT6       | -0,177856257 | -0,249837917 | 0 | N.A. | 0 |
| RP11-477D19 | -0,178064638 | -0,007295929 | 0 | N.A. | 0 |
| ZNF195      | -0,178099905 | 0,023251689  | 0 | N.A. | 0 |
| RP11-218F10 | -0,178196804 | -0,0171944   | 0 | N.A. | 0 |
| NAP1L5      | -0,178203342 | -0,21827989  | 0 | N.A. | 0 |
| PGM5        | -0,178267394 |              | 0 | N.A. | 0 |
| RAB30-AS1   | -0,178277078 | -0,242831747 | 0 | N.A. | 0 |
| RP11-634H22 | -0,178286511 | 0,188416378  | 0 | N.A. | 0 |

|             |              |              |   |      |   |
|-------------|--------------|--------------|---|------|---|
| FCHO1       | -0,178325748 | 0,016768041  | 0 | N.A. | 0 |
| AARS2       | -0,178441932 | 0,186721817  | 0 | N.A. | 0 |
| SAMD1       | -0,178465152 | 0,146870474  | 0 | N.A. | 0 |
| RP11-165A20 | -0,178475166 | -0,012176048 | 0 | N.A. | 0 |
| SOBP        | -0,178531523 | -0,260271253 | 0 | N.A. | 0 |
| HILPDA      | -0,178695937 | -0,071592884 | 0 | N.A. | 0 |
| NSFL1C      | -0,178727688 | 0,025550588  | 0 | N.A. | 0 |
| CEP192      | -0,17880771  | 0,036109461  | 0 | N.A. | 0 |
| MBNL3       | -0,178879442 | -0,031819303 | 0 | N.A. | 0 |
| SMIM15      | -0,178903773 | -0,124630006 | 0 | N.A. | 0 |
| C15orf57    | -0,178923654 | -0,032508544 | 0 | N.A. | 0 |
| C1orf194    | -0,178946534 | -0,139393162 | 0 | N.A. | 0 |
| RP11-146F11 | -0,178999194 | -0,173943794 | 0 | N.A. | 0 |
| NODAL       | -0,179006781 |              | 0 | N.A. | 0 |
| ADPRHL2     | -0,179032058 | 0,034093929  | 0 | N.A. | 0 |
| L3MBTL2     | -0,179086302 | -0,085748426 | 0 | N.A. | 0 |
| AASDH       | -0,179125129 | -0,049613999 | 0 | N.A. | 0 |
| OXSM        | -0,17916735  | -0,253053246 | 0 | N.A. | 0 |
| CENPL       | -0,179186857 | -0,363022161 | 0 | N.A. | 0 |
| ARHGEF38    | -0,179212263 | 0,018450187  | 0 | N.A. | 0 |
| GNAZ        | -0,179352105 | -0,028197087 | 0 | N.A. | 0 |
| CCDC22      | -0,179368191 | -0,256562388 | 0 | N.A. | 0 |
| COMMD2      | -0,179422283 | -0,251493133 | 0 | N.A. | 0 |
| RP11-254F7. | -0,17950312  | -0,127817188 | 0 | N.A. | 0 |
| ORAOV1      | -0,179533694 | -0,052269122 | 0 | N.A. | 0 |
| BDP1        | -0,179577926 | 0,081680331  | 0 | N.A. | 0 |
| SYBU        | -0,179579593 | -0,305875388 | 0 | N.A. | 0 |
| RTKN2       | -0,179631965 | -0,004179514 | 0 | N.A. | 0 |
| DCLRE1A     | -0,179694488 | -0,236893404 | 0 | N.A. | 0 |
| ZNF816      | -0,179704208 | -0,069206036 | 0 | N.A. | 0 |
| DBH-AS1     | -0,179801577 |              | 0 | N.A. | 0 |
| ZNF576      | -0,179943677 | -0,017146235 | 0 | N.A. | 0 |
| CTD-2015H6  | -0,179945591 | -0,213155821 | 0 | N.A. | 0 |

|             |              |              |   |      |   |
|-------------|--------------|--------------|---|------|---|
| OPA1        | -0,179993531 | 0,16314904   | 0 | N.A. | 0 |
| RP3-431P23. | -0,180000524 | -0,033130301 | 0 | N.A. | 0 |
| AKAP4       | -0,18005936  | -0,050511744 | 0 | N.A. | 0 |
| NGFRAP1     | -0,180071777 | -0,408968625 | 0 | N.A. | 0 |
| RECQL       | -0,180098001 | -0,192974515 | 0 | N.A. | 0 |
| MTR         | -0,180214079 | 0,078909642  | 0 | N.A. | 0 |
| EGR4        | -0,180237543 | -0,004588041 | 0 | N.A. | 0 |
| FAM166B     | -0,180245824 | -0,03613772  | 0 | N.A. | 0 |
| TRIM37      | -0,180282631 | -0,0166567   | 0 | N.A. | 0 |
| LMAN2       | -0,180335564 | 0,150421205  | 0 | N.A. | 0 |
| DDX23       | -0,180427999 | -0,057732068 | 0 | N.A. | 0 |
| LRRC6       | -0,180467986 | -0,017869738 | 0 | N.A. | 0 |
| TMED3       | -0,180540374 | 0,061151885  | 0 | N.A. | 0 |
| FECH        | -0,180573007 | -0,177541774 | 0 | N.A. | 0 |
| TMSB15A     | -0,180612364 |              | 0 | N.A. | 0 |
| PFKL        | -0,180716633 | 0,117454316  | 0 | N.A. | 0 |
| USP46       | -0,180755552 | -0,02235429  | 0 | N.A. | 0 |
| SUDS3       | -0,180786379 | 0,227589598  | 0 | N.A. | 0 |
| SPERT       | -0,181059052 | -0,06775217  | 0 | N.A. | 0 |
| FAM110D     | -0,181095939 |              | 0 | N.A. | 0 |
| B3GAT3      | -0,181179766 | 0,168984505  | 0 | N.A. | 0 |
| AC007099.1  | -0,181211623 | 0,005036517  | 0 | N.A. | 0 |
| SLX4IP      | -0,181362935 | -0,080896105 | 0 | N.A. | 0 |
| LINC01006   | -0,181408026 | -0,187427329 | 0 | N.A. | 0 |
| ACVR1C      | -0,181425021 | -0,204801803 | 0 | N.A. | 0 |
| PCP4        | -0,18144509  | -0,310842525 | 0 | N.A. | 0 |
| FAM173A     | -0,181468788 | 0,140188763  | 0 | N.A. | 0 |
| DERL3       | -0,181480829 | -0,114179613 | 0 | N.A. | 0 |
| CNBD2       | -0,1815428   | -0,025190315 | 0 | N.A. | 0 |
| RP11-322E11 | -0,181759484 | 0,075694812  | 0 | N.A. | 0 |
| LINC01560   | -0,181882355 | 0,223848769  | 0 | N.A. | 0 |
| PKLR        | -0,181958385 |              | 0 | N.A. | 0 |
| ZNRD1       | -0,182054702 | -0,103988862 | 0 | N.A. | 0 |

|              |              |              |   |      |   |
|--------------|--------------|--------------|---|------|---|
| PSPH         | -0,182060877 | -0,419854597 | 0 | N.A. | 0 |
| TARBP1       | -0,182193825 | -0,017030557 | 0 | N.A. | 0 |
| LCN15        | -0,18236251  | -0,166494353 | 0 | N.A. | 0 |
| NID1         | -0,18239984  | -0,126594329 | 0 | N.A. | 0 |
| CRIP1        | -0,182418048 | -0,250247534 | 0 | N.A. | 0 |
| GTF2H2       | -0,182563054 | -0,239117124 | 0 | N.A. | 0 |
| YRDC         | -0,182643603 | 0,162484007  | 0 | N.A. | 0 |
| ZNF485       | -0,182718448 | -0,122969486 | 0 | N.A. | 0 |
| RP11-602N24  | -0,182845097 | -0,233870089 | 0 | N.A. | 0 |
| ZNF550       | -0,182967495 | 0,074774034  | 0 | N.A. | 0 |
| ERVMER34-1   | -0,18299991  | -0,0615689   | 0 | N.A. | 0 |
| CYFIP2       | -0,183087227 | -0,052246263 | 0 | N.A. | 0 |
| NES          | -0,183136071 | 0,058875824  | 0 | N.A. | 0 |
| MEIOB        | -0,183141817 | -0,235849003 | 0 | N.A. | 0 |
| FAM171A1     | -0,183182534 | -0,103415122 | 0 | N.A. | 0 |
| CYP4X1       | -0,183330939 | -0,173826072 | 0 | N.A. | 0 |
| CTD-2555O1   | -0,183401748 | 0,073660981  | 0 | N.A. | 0 |
| FBXL6        | -0,183497901 | 0,18641871   | 0 | N.A. | 0 |
| RP1-40E16.1  | -0,183504253 | -0,070101534 | 0 | N.A. | 0 |
| TTC5         | -0,183548394 | -0,0727722   | 0 | N.A. | 0 |
| NREP         | -0,183796242 | -0,308096492 | 0 | N.A. | 0 |
| CA11         | -0,183852853 | -0,017825211 | 0 | N.A. | 0 |
| CTD-2227E11  | -0,18399778  | 0,025205877  | 0 | N.A. | 0 |
| RP11-401F2.1 | -0,183998662 | -0,089765176 | 0 | N.A. | 0 |
| YBX3         | -0,184074128 | -0,025807553 | 0 | N.A. | 0 |
| DCP1B        | -0,184083978 | -0,057435739 | 0 | N.A. | 0 |
| PLCL1        | -0,184166171 | -0,288731556 | 0 | N.A. | 0 |
| YTHDF2       | -0,184171197 | -0,009895337 | 0 | N.A. | 0 |
| REEP5        | -0,184184491 | 0,460405387  | 0 | N.A. | 0 |
| RP5-881L22.1 | -0,184361335 | -0,277031702 | 0 | N.A. | 0 |
| RP11-110G2.1 | -0,184376389 | -0,198810084 | 0 | N.A. | 0 |
| COG4         | -0,184410562 | -0,093346476 | 0 | N.A. | 0 |
| CKAP4        | -0,184681801 | -0,009282683 | 0 | N.A. | 0 |



|             |              |              |   |      |   |
|-------------|--------------|--------------|---|------|---|
| SLC39A2     | -0,18468393  |              | 0 | N.A. | 0 |
| ASB4        | -0,184695072 | 0,216294223  | 0 | N.A. | 0 |
| ZNF76       | -0,184729572 | -0,237167442 | 0 | N.A. | 0 |
| RUSC1       | -0,184734018 | 0,168210871  | 0 | N.A. | 0 |
| DNAJC3-AS1  | -0,184786434 | 0,105210951  | 0 | N.A. | 0 |
| RP11-141J13 | -0,184865168 | -0,298882191 | 0 | N.A. | 0 |
| CLPSL2      | -0,185091504 | -0,137805119 | 0 | N.A. | 0 |
| RP11-10A14. | -0,185149827 | -0,016202958 | 0 | N.A. | 0 |
| CD44        | -0,18524605  | -0,321441415 | 0 | N.A. | 0 |
| CTPS2       | -0,185452808 | -0,147992431 | 0 | N.A. | 0 |
| HSCB        | -0,185475666 | -0,282794753 | 0 | N.A. | 0 |
| GGA2        | -0,185661163 | -0,226868995 | 0 | N.A. | 0 |
| ST3GAL3     | -0,18567805  | 0,048056706  | 0 | N.A. | 0 |
| JMJD4       | -0,185700469 | 0,014691378  | 0 | N.A. | 0 |
| HAUS4       | -0,185786798 | -0,367998943 | 0 | N.A. | 0 |
| FBP1        | -0,185802611 | -0,090541081 | 0 | N.A. | 0 |
| RHBG        | -0,185959707 | 0,006800455  | 0 | N.A. | 0 |
| PRKCSH      | -0,186016721 | 0,241409565  | 0 | N.A. | 0 |
| DAPL1       | -0,186091673 | -0,155132335 | 0 | N.A. | 0 |
| PET100      | -0,186137014 | -0,219377534 | 0 | N.A. | 0 |
| RANGAP1     | -0,186149046 | -0,266476732 | 0 | N.A. | 0 |
| SNX6        | -0,18632647  | -0,318976142 | 0 | N.A. | 0 |
| DNMT3B      | -0,186450451 | -0,102833117 | 0 | N.A. | 0 |
| LA16c-352F7 | -0,186535918 |              | 0 | N.A. | 0 |
| GPATCH2     | -0,186617015 | 0,218346752  | 0 | N.A. | 0 |
| SELT        | -0,186656437 | 0,162536357  | 0 | N.A. | 0 |
| CASP2       | -0,186657392 | -0,153139374 | 0 | N.A. | 0 |
| CEP57L1     | -0,186787981 | -0,306485012 | 0 | N.A. | 0 |
| MCOLN2      | -0,186830218 | -0,122334029 | 0 | N.A. | 0 |
| FKBP7       | -0,186888065 | 0,045022913  | 0 | N.A. | 0 |
| CD99        | -0,186901768 | 0,074155455  | 0 | N.A. | 0 |
| PEX10       | -0,186904987 | -0,030612617 | 0 | N.A. | 0 |
| RP11-644N4. | -0,186922807 | 0,042750086  | 0 | N.A. | 0 |

|             |              |              |   |      |   |
|-------------|--------------|--------------|---|------|---|
| PPP1R8      | -0,186951837 | -0,319148696 | 0 | N.A. | 0 |
| CD200       | -0,186971267 | -0,36906331  | 0 | N.A. | 0 |
| RAD51B      | -0,187050673 | -0,210865181 | 0 | N.A. | 0 |
| MAP7D3      | -0,18707892  | -0,121277983 | 0 | N.A. | 0 |
| DNAH2       | -0,187122528 | 0,12574651   | 0 | N.A. | 0 |
| AIG1        | -0,187191833 | -0,027616431 | 0 | N.A. | 0 |
| C11orf49    | -0,187226569 | -0,100344748 | 0 | N.A. | 0 |
| PFDN1       | -0,187357299 | 0,221805375  | 0 | N.A. | 0 |
| GALNT11     | -0,187391492 | 0,064913313  | 0 | N.A. | 0 |
| SMIM11      | -0,187448128 | 0,035973061  | 0 | N.A. | 0 |
| SAMD13      | -0,187470018 | -0,232113249 | 0 | N.A. | 0 |
| FAM173B     | -0,187476986 | -0,104043236 | 0 | N.A. | 0 |
| THOP1       | -0,187584868 | 0,227491534  | 0 | N.A. | 0 |
| WDR35       | -0,187705603 | -0,084623463 | 0 | N.A. | 0 |
| AFMID       | -0,187839808 | 0,036715129  | 0 | N.A. | 0 |
| CASP3       | -0,187897557 | 0,187553239  | 0 | N.A. | 0 |
| XXbac-BPG32 | -0,187983506 | -0,167490089 | 0 | N.A. | 0 |
| DDX11-AS1   | -0,188067293 | -0,376152085 | 0 | N.A. | 0 |
| UFSP2       | -0,188077129 | -0,245014518 | 0 | N.A. | 0 |
| HMGXB4      | -0,188138696 | 0,014857682  | 0 | N.A. | 0 |
| IGF2BP1     | -0,188379307 |              | 0 | N.A. | 0 |
| AC006994.2  | -0,188380243 | 0,104816432  | 0 | N.A. | 0 |
| FXR1        | -0,188498375 | -0,144636799 | 0 | N.A. | 0 |
| SEPSECS-AS1 | -0,18850505  | -0,303899811 | 0 | N.A. | 0 |
| PAXIP1      | -0,188543478 | -0,081017953 | 0 | N.A. | 0 |
| MAP3K4      | -0,18857445  | 0,082534789  | 0 | N.A. | 0 |
| RBM19       | -0,188724676 | -0,145042528 | 0 | N.A. | 0 |
| TOP2B       | -0,188776104 | -0,027559631 | 0 | N.A. | 0 |
| MTF2        | -0,188863167 | -0,155379975 | 0 | N.A. | 0 |
| SPIN2B      | -0,188874531 | 0,05720167   | 0 | N.A. | 0 |
| SOX1        | -0,188941056 | 0,02055077   | 0 | N.A. | 0 |
| OMA1        | -0,188970334 | -0,18798335  | 0 | N.A. | 0 |
| ZNF2        | -0,188975942 | -0,095077584 | 0 | N.A. | 0 |

|              |              |              |   |      |   |
|--------------|--------------|--------------|---|------|---|
| RP1-8B1.4    | -0,188984613 | -0,273897335 | 0 | N.A. | 0 |
| CCDC57       | -0,188996325 | -0,27589991  | 0 | N.A. | 0 |
| CYP4B1       | -0,189089888 | 0,350333322  | 0 | N.A. | 0 |
| RP11-697E2.  | -0,189219976 | 0,004213313  | 0 | N.A. | 0 |
| NEMF         | -0,18923393  | 0,155191934  | 0 | N.A. | 0 |
| RPAP1        | -0,189260384 | 0,023288144  | 0 | N.A. | 0 |
| RP5-832C2.5  | -0,189275392 | 0,039732787  | 0 | N.A. | 0 |
| RP11-190C22  | -0,189277361 | 0,207351522  | 0 | N.A. | 0 |
| ESPL1        | -0,189299275 | -0,203264621 | 0 | N.A. | 0 |
| RP11-285A1.  | -0,189319568 |              | 0 | N.A. | 0 |
| DSC3         | -0,189351722 | 0,222355715  | 0 | N.A. | 0 |
| ECI1         | -0,189353689 | 0,189032199  | 0 | N.A. | 0 |
| RP11-152N13  | -0,189386687 | -0,203066472 | 0 | N.A. | 0 |
| RP11-402J6.1 | -0,189391838 | -0,246427291 | 0 | N.A. | 0 |
| CES1         | -0,189489576 | -0,06863756  | 0 | N.A. | 0 |
| WDYHV1       | -0,189501761 | -0,247990056 | 0 | N.A. | 0 |
| SHPRH        | -0,189953815 | 0,056433414  | 0 | N.A. | 0 |
| LRRC20       | -0,190075256 | -0,135143163 | 0 | N.A. | 0 |
| DDR GK1      | -0,190141174 | 0,180314007  | 0 | N.A. | 0 |
| PPWD1        | -0,19016021  | -0,158672152 | 0 | N.A. | 0 |
| SDF2L1       | -0,190231349 | -0,272512129 | 0 | N.A. | 0 |
| MARS2        | -0,190343303 | -0,192369036 | 0 | N.A. | 0 |
| DLX6-AS1     | -0,190350502 | -0,222594664 | 0 | N.A. | 0 |
| RP11-44F21.  | -0,190351572 | -0,144407674 | 0 | N.A. | 0 |
| ZC3H18       | -0,190535798 | 0,065419894  | 0 | N.A. | 0 |
| B3GNTL1      | -0,190611288 | -0,17301083  | 0 | N.A. | 0 |
| BDH2         | -0,190678806 | -0,334358338 | 0 | N.A. | 0 |
| RNF168       | -0,190753324 | 0,048143351  | 0 | N.A. | 0 |
| RP11-666O2.  | -0,190928961 | -0,217823306 | 0 | N.A. | 0 |
| CEP131       | -0,190938116 | -0,173896792 | 0 | N.A. | 0 |
| CLUH         | -0,190952083 | 0,09178946   | 0 | N.A. | 0 |
| B4GAT1       | -0,191249917 | 0,24299602   | 0 | N.A. | 0 |
| MSTO1        | -0,191254791 | -0,155901052 | 0 | N.A. | 0 |

|             |              |              |   |      |   |
|-------------|--------------|--------------|---|------|---|
| VAR52       | -0,191337948 | -0,18035798  | 0 | N.A. | 0 |
| LRPAP1      | -0,191426197 | 0,098727046  | 0 | N.A. | 0 |
| PLTP        | -0,191510749 | -0,057078584 | 0 | N.A. | 0 |
| TEX40       | -0,191521038 | -0,249040396 | 0 | N.A. | 0 |
| UNC45A      | -0,191603699 | 0,003806611  | 0 | N.A. | 0 |
| TIMM10B     | -0,191656984 | -0,271130549 | 0 | N.A. | 0 |
| ORC4        | -0,191721454 | -0,006788373 | 0 | N.A. | 0 |
| KRIT1       | -0,191768637 | -0,022357781 | 0 | N.A. | 0 |
| RP11-42O4.2 | -0,191781774 | 0,085273201  | 0 | N.A. | 0 |
| ZPR1        | -0,191785104 | -0,25745012  | 0 | N.A. | 0 |
| AF064858.8  | -0,191797905 | -0,067340679 | 0 | N.A. | 0 |
| P2RY8       | -0,19181173  | -0,088758096 | 0 | N.A. | 0 |
| TXNDC16     | -0,191828019 | 0,019092986  | 0 | N.A. | 0 |
| ERCC2       | -0,191862721 | -0,090492242 | 0 | N.A. | 0 |
| GZMB        | -0,191867157 | -0,373351738 | 0 | N.A. | 0 |
| C2orf49     | -0,191907108 | 0,122035614  | 0 | N.A. | 0 |
| RP11-352M1  | -0,19190885  | -0,109510683 | 0 | N.A. | 0 |
| ASH2L       | -0,192010602 | -0,207827244 | 0 | N.A. | 0 |
| DUS4L       | -0,192238314 | -0,220971372 | 0 | N.A. | 0 |
| PRR3        | -0,192247451 | -0,191986394 | 0 | N.A. | 0 |
| MVB12A      | -0,192266699 | -0,272276792 | 0 | N.A. | 0 |
| TIFA        | -0,192272938 | -0,404274265 | 0 | N.A. | 0 |
| TNKS2-AS1   | -0,192358846 | -0,093358627 | 0 | N.A. | 0 |
| TDRKH       | -0,192435602 | -0,043311381 | 0 | N.A. | 0 |
| CEACAM21    | -0,192454927 |              | 0 | N.A. | 0 |
| RP11-396C23 | -0,192463474 | -0,12767819  | 0 | N.A. | 0 |
| GADD45G     | -0,192549419 | -0,187284368 | 0 | N.A. | 0 |
| NFE2        | -0,192615108 | -0,026320883 | 0 | N.A. | 0 |
| HYKK        | -0,192616424 | -0,429532279 | 0 | N.A. | 0 |
| MICU2       | -0,19271376  | -0,150238313 | 0 | N.A. | 0 |
| NPEPL1      | -0,193185439 | 0,124096631  | 0 | N.A. | 0 |
| PRMT6       | -0,193191792 | -0,390751512 | 0 | N.A. | 0 |
| GPD1L       | -0,193196782 | -0,344438255 | 0 | N.A. | 0 |

|             |              |              |   |      |   |
|-------------|--------------|--------------|---|------|---|
| PROCR       | -0,193259628 | -0,24268127  | 0 | N.A. | 0 |
| PLCH1       | -0,193278766 | -0,062755822 | 0 | N.A. | 0 |
| CTNNBIP1    | -0,193281052 | 0,327262624  | 0 | N.A. | 0 |
| SWSAP1      | -0,193368147 | 0,012517988  | 0 | N.A. | 0 |
| BCDIN3D     | -0,193376503 | -0,15057182  | 0 | N.A. | 0 |
| RNF138      | -0,193463773 | -0,37521444  | 0 | N.A. | 0 |
| THAP7       | -0,193559119 | -0,266618147 | 0 | N.A. | 0 |
| SPRYD4      | -0,193572151 | -0,211047226 | 0 | N.A. | 0 |
| PASK        | -0,193579366 | -0,179810973 | 0 | N.A. | 0 |
| E2F7        | -0,193609192 | -0,324494213 | 0 | N.A. | 0 |
| COG8        | -0,193747026 | -0,199126284 | 0 | N.A. | 0 |
| C20orf196   | -0,193773698 | -0,339231412 | 0 | N.A. | 0 |
| VGF         | -0,193890839 | -0,221285225 | 0 | N.A. | 0 |
| IPO11       | -0,194024035 | -0,425067036 | 0 | N.A. | 0 |
| HHEX        | -0,194063542 | -0,263719565 | 0 | N.A. | 0 |
| RP11-511B23 | -0,194241015 | 0,068107124  | 0 | N.A. | 0 |
| FKBPL       | -0,194354404 | -0,123551436 | 0 | N.A. | 0 |
| C7orf49     | -0,194410634 | -0,019301651 | 0 | N.A. | 0 |
| SLC25A22    | -0,194550023 | -0,195172142 | 0 | N.A. | 0 |
| LRRC74A     | -0,19464743  |              | 0 | N.A. | 0 |
| ARID5B      | -0,194661185 | -0,107650326 | 0 | N.A. | 0 |
| LUC7L       | -0,194761228 | 0,132978745  | 0 | N.A. | 0 |
| REG1A       | -0,194810018 | -0,125996421 | 0 | N.A. | 0 |
| PHTF2       | -0,194862029 | 0,056978373  | 0 | N.A. | 0 |
| BRMS1L      | -0,194882026 | -0,230556102 | 0 | N.A. | 0 |
| ATP5L2      | -0,195003928 | -0,332518464 | 0 | N.A. | 0 |
| UBE3D       | -0,1950205   | -0,247976295 | 0 | N.A. | 0 |
| ACTR1B      | -0,195053116 | 0,18402398   | 0 | N.A. | 0 |
| THTPA       | -0,195098934 | -0,367761142 | 0 | N.A. | 0 |
| FBXO16      | -0,195307612 | -0,257191722 | 0 | N.A. | 0 |
| FRAT2       | -0,195443133 | -0,125894976 | 0 | N.A. | 0 |
| GALNT14     | -0,195521083 |              | 0 | N.A. | 0 |
| EHF         | -0,195538187 | 0,172720665  | 0 | N.A. | 0 |

|             |              |              |   |      |   |
|-------------|--------------|--------------|---|------|---|
| EDEM2       | -0,195572936 | 0,168369493  | 0 | N.A. | 0 |
| LRTOMT      | -0,195649052 | -0,12434242  | 0 | N.A. | 0 |
| KTI12       | -0,195703133 | -0,201780389 | 0 | N.A. | 0 |
| DCAF7       | -0,195762256 | 0,149541879  | 0 | N.A. | 0 |
| NNT         | -0,195843771 | 0,062312265  | 0 | N.A. | 0 |
| PHOSPHO2    | -0,196011533 | -0,157894893 | 0 | N.A. | 0 |
| RWDD2B      | -0,196107828 | -0,212436354 | 0 | N.A. | 0 |
| RMND1       | -0,196124448 | -0,410169232 | 0 | N.A. | 0 |
| C19orf45    | -0,196158227 | -0,274171647 | 0 | N.A. | 0 |
| TRIM32      | -0,196296086 | -0,103034574 | 0 | N.A. | 0 |
| LINC00441   | -0,1963604   | -0,16651788  | 0 | N.A. | 0 |
| PRPF40B     | -0,19636244  | 0,096651345  | 0 | N.A. | 0 |
| LACTB2      | -0,196372599 | 0,041945997  | 0 | N.A. | 0 |
| SUGP1       | -0,196386329 | -0,162736555 | 0 | N.A. | 0 |
| TTF1        | -0,196528596 | -0,12739841  | 0 | N.A. | 0 |
| CWF19L1     | -0,196594085 | 0,013819505  | 0 | N.A. | 0 |
| GMPR        | -0,196623755 | -0,21628111  | 0 | N.A. | 0 |
| DDX51       | -0,196631028 | 0,0057349    | 0 | N.A. | 0 |
| HOGA1       | -0,196755731 | 0,163493037  | 0 | N.A. | 0 |
| PRSS3P2     | -0,19678304  | 0,166285241  | 0 | N.A. | 0 |
| CERKL       | -0,196993816 | -0,103781465 | 0 | N.A. | 0 |
| ADCK1       | -0,197059526 | -0,096857606 | 0 | N.A. | 0 |
| SH3BGRL     | -0,197133106 | -0,591848227 | 0 | N.A. | 0 |
| KIAA1614-AS | -0,197180309 | -0,199291127 | 0 | N.A. | 0 |
| PDSS2       | -0,197228972 | -0,374494287 | 0 | N.A. | 0 |
| HSD17B6     | -0,197243502 | -0,302632711 | 0 | N.A. | 0 |
| INTS4       | -0,197260115 | -0,331468601 | 0 | N.A. | 0 |
| HAS2-AS1    | -0,197427122 | -0,369286547 | 0 | N.A. | 0 |
| SLC2A4RG    | -0,197453031 | 0,024834825  | 0 | N.A. | 0 |
| CISH        | -0,19745439  | -0,375573918 | 0 | N.A. | 0 |
| ZNF620      | -0,19747414  | -0,353046675 | 0 | N.A. | 0 |
| GORASP2     | -0,197665193 | 0,307374778  | 0 | N.A. | 0 |
| SNAPC1      | -0,197675448 | -0,284657975 | 0 | N.A. | 0 |

|             |              |              |   |      |   |
|-------------|--------------|--------------|---|------|---|
| UBFD1       | -0,19771222  | -0,037318675 | 0 | N.A. | 0 |
| SNRNP200    | -0,197762142 | 0,174958107  | 0 | N.A. | 0 |
| ERP27       | -0,19777743  | -0,186172273 | 0 | N.A. | 0 |
| RP11-267M2  | -0,197859802 | 0,083241293  | 0 | N.A. | 0 |
| TMEM242     | -0,197903666 | 0,089876913  | 0 | N.A. | 0 |
| SENP8       | -0,19790404  | -0,076753634 | 0 | N.A. | 0 |
| SLMO1       | -0,19790684  | -0,002091146 | 0 | N.A. | 0 |
| METTL18     | -0,198044727 | -0,230711795 | 0 | N.A. | 0 |
| RGN         | -0,198121942 | 0,016520309  | 0 | N.A. | 0 |
| MSI1        | -0,198128705 | -0,32709653  | 0 | N.A. | 0 |
| CRABP1      | -0,198142611 | -0,099420258 | 0 | N.A. | 0 |
| HSPA4L      | -0,198151506 | -0,158446697 | 0 | N.A. | 0 |
| ICMT        | -0,198195477 | 0,14876996   | 0 | N.A. | 0 |
| BLOC1S2     | -0,198203605 | -0,370026046 | 0 | N.A. | 0 |
| MIR181A2HG  | -0,198214789 | -0,111355745 | 0 | N.A. | 0 |
| WDFY4       | -0,198280468 | -0,247591382 | 0 | N.A. | 0 |
| NMI         | -0,198501202 | -0,084654697 | 0 | N.A. | 0 |
| RP11-135A1. | -0,198554536 | 0,00701776   | 0 | N.A. | 0 |
| RP11-119B16 | -0,198652321 | 0,232661398  | 0 | N.A. | 0 |
| NIPA2       | -0,198683179 | -0,161816732 | 0 | N.A. | 0 |
| RP1-39G22.7 | -0,198732973 | -0,001650266 | 0 | N.A. | 0 |
| COPG2       | -0,198868572 | -0,267509541 | 0 | N.A. | 0 |
| DPM3        | -0,199011415 | 0,240524787  | 0 | N.A. | 0 |
| ENDOG       | -0,199061374 | 0,129618395  | 0 | N.A. | 0 |
| C17orf53    | -0,199082187 | -0,39178644  | 0 | N.A. | 0 |
| TRMT5       | -0,199116177 | -0,320860322 | 0 | N.A. | 0 |
| TSTD1       | -0,199147603 | -0,074802152 | 0 | N.A. | 0 |
| CHRAC1      | -0,199255539 | -0,234962704 | 0 | N.A. | 0 |
| THUMPD1     | -0,199348429 | 0,063199556  | 0 | N.A. | 0 |
| ARSE        | -0,199380524 | -0,261512814 | 0 | N.A. | 0 |
| THAP5       | -0,199475495 | -0,377571489 | 0 | N.A. | 0 |
| OGFOD1      | -0,199673008 | -0,276465684 | 0 | N.A. | 0 |
| ZMPSTE24    | -0,199681031 | -0,023851151 | 0 | N.A. | 0 |

|            |              |              |   |      |   |
|------------|--------------|--------------|---|------|---|
| ADH6       | -0,199793135 | -0,254448158 | 0 | N.A. | 0 |
| GIMAP4     | -0,199895134 | -0,245220464 | 0 | N.A. | 0 |
| EMC10      | -0,199921813 | 0,288985857  | 0 | N.A. | 0 |
| NKAP       | -0,200138521 | 0,186279041  | 0 | N.A. | 0 |
| COX15      | -0,200198826 | -0,32194841  | 0 | N.A. | 0 |
| SLC35A4    | -0,200203105 | -0,276011862 | 0 | N.A. | 0 |
| DDX20      | -0,200249816 | 0,041198608  | 0 | N.A. | 0 |
| DNAJC15    | -0,200386342 | -0,030878277 | 0 | N.A. | 0 |
| GPRIN3     | -0,200401442 | -0,251865151 | 0 | N.A. | 0 |
| HNRNPCL1   | -0,200570452 | 0,048387275  | 0 | N.A. | 0 |
| SEC22C     | -0,200794041 | -0,315591127 | 0 | N.A. | 0 |
| LTF        | -0,200946651 |              | 0 | N.A. | 0 |
| SLC35F2    | -0,201094875 | 0,073813891  | 0 | N.A. | 0 |
| KIAA1324   | -0,201167673 | -0,161910479 | 0 | N.A. | 0 |
| ATP2C2     | -0,201212311 | -0,045617061 | 0 | N.A. | 0 |
| NFYC       | -0,201421098 | -0,170188397 | 0 | N.A. | 0 |
| ELN        | -0,201424868 | -0,119282601 | 0 | N.A. | 0 |
| CHCHD5     | -0,201607186 | -0,165975654 | 0 | N.A. | 0 |
| LIPT1      | -0,20162404  | -0,097276386 | 0 | N.A. | 0 |
| MAD2L1BP   | -0,201689649 | 0,04750919   | 0 | N.A. | 0 |
| MORC4      | -0,20169067  | 0,008401922  | 0 | N.A. | 0 |
| ADAMTS15   | -0,201760113 | -0,068093341 | 0 | N.A. | 0 |
| DHRS13     | -0,201817982 | -0,262811188 | 0 | N.A. | 0 |
| RBP2       | -0,201920088 | -0,378756067 | 0 | N.A. | 0 |
| CCR10      | -0,202287607 | -0,04830035  | 0 | N.A. | 0 |
| TXNDC5     | -0,202293694 | 0,050284112  | 0 | N.A. | 0 |
| THNSL1     | -0,202429738 | -0,067558276 | 0 | N.A. | 0 |
| LRIG3      | -0,202477041 | 0,075488971  | 0 | N.A. | 0 |
| SPATC1L    | -0,20263455  | -0,218007493 | 0 | N.A. | 0 |
| RP11-435O5 | -0,202702239 | -0,024385799 | 0 | N.A. | 0 |
| CC2D2A     | -0,202731662 | -0,01997541  | 0 | N.A. | 0 |
| LIMK2      | -0,202756362 | -0,058605956 | 0 | N.A. | 0 |
| SERGEF     | -0,20276378  | -0,159372085 | 0 | N.A. | 0 |



|              |              |              |   |      |   |
|--------------|--------------|--------------|---|------|---|
| MPP6         | -0,202778379 | -0,162927134 | 0 | N.A. | 0 |
| ZNF253       | -0,202796122 | -0,255527781 | 0 | N.A. | 0 |
| NFXL1        | -0,202821035 | -0,166119477 | 0 | N.A. | 0 |
| DROSHA       | -0,202962896 | -0,057958545 | 0 | N.A. | 0 |
| C6orf136     | -0,203019144 | 0,072946234  | 0 | N.A. | 0 |
| DUSP11       | -0,203037148 | -0,106960208 | 0 | N.A. | 0 |
| RP11-554J4.1 | -0,203244069 | 0,01586197   | 0 | N.A. | 0 |
| TIAL1        | -0,203297557 | 0,089054699  | 0 | N.A. | 0 |
| ACIN1        | -0,203302023 | 0,168923372  | 0 | N.A. | 0 |
| RP11-452H2.1 | -0,203628827 |              | 0 | N.A. | 0 |
| ACTN1        | -0,203718761 | 0,218246475  | 0 | N.A. | 0 |
| RP1-40E16.1  | -0,203893922 |              | 0 | N.A. | 0 |
| SETMAR       | -0,2040138   | -0,223678287 | 0 | N.A. | 0 |
| TMSB4Y       | -0,204078788 | 0,095117678  | 0 | N.A. | 0 |
| TOLLIP-AS1   | -0,204182184 | 0,129829616  | 0 | N.A. | 0 |
| FGFR1OP      | -0,204428794 | 0,091567217  | 0 | N.A. | 0 |
| DTD2         | -0,204524891 | -0,310539922 | 0 | N.A. | 0 |
| ZNHIT1       | -0,204546179 | -0,284159503 | 0 | N.A. | 0 |
| BAG6         | -0,204553642 | 0,006624446  | 0 | N.A. | 0 |
| RP1-315G1.3  | -0,204632273 | -0,194314711 | 0 | N.A. | 0 |
| ARL1         | -0,204655254 | -0,013335131 | 0 | N.A. | 0 |
| ZFR          | -0,20465898  | -0,040905385 | 0 | N.A. | 0 |
| UBL5         | -0,204720679 | -0,253187555 | 0 | N.A. | 0 |
| ELP2         | -0,204832473 | -0,316567973 | 0 | N.A. | 0 |
| RAP1GDS1     | -0,204920437 | -0,240671954 | 0 | N.A. | 0 |
| CH17-373J23  | -0,204935164 | 0,222818468  | 0 | N.A. | 0 |
| ATP6V0E2-AS1 | -0,205096201 | 0,126963724  | 0 | N.A. | 0 |
| WARS2        | -0,205177824 | -0,227223602 | 0 | N.A. | 0 |
| SRP68        | -0,205258578 | 0,086415381  | 0 | N.A. | 0 |
| C2orf15      | -0,205270779 | -0,226510172 | 0 | N.A. | 0 |
| HMGA1        | -0,205533787 | -0,081281524 | 0 | N.A. | 0 |
| RAC3         | -0,205565321 | -0,042341834 | 0 | N.A. | 0 |
| IQCH-AS1     | -0,205652869 | -0,13259006  | 0 | N.A. | 0 |

|            |              |              |   |      |   |
|------------|--------------|--------------|---|------|---|
| DAD1       | -0,205664114 | 0,037353732  | 0 | N.A. | 0 |
| ZNF32      | -0,205717836 | -0,055887732 | 0 | N.A. | 0 |
| DMAP1      | -0,205813619 | -0,227023324 | 0 | N.A. | 0 |
| LETM1      | -0,205921587 | 0,045885429  | 0 | N.A. | 0 |
| LINC01123  | -0,206077733 | -0,167841674 | 0 | N.A. | 0 |
| NEK3       | -0,20607887  | -0,099894223 | 0 | N.A. | 0 |
| EMC3       | -0,206123505 | 0,021133513  | 0 | N.A. | 0 |
| M6PR       | -0,206215074 | -0,081490258 | 0 | N.A. | 0 |
| GPHN       | -0,206440481 | -0,041243728 | 0 | N.A. | 0 |
| ASH1L-AS1  | -0,20648977  | -0,033271807 | 0 | N.A. | 0 |
| CYB561     | -0,206562272 | 0,225170062  | 0 | N.A. | 0 |
| MDM1       | -0,206564078 | -0,082929153 | 0 | N.A. | 0 |
| OTX1       | -0,206690941 | 0,093202383  | 0 | N.A. | 0 |
| ZSCAN16    | -0,206816754 | -0,247653657 | 0 | N.A. | 0 |
| MRFAP1L1   | -0,20693204  | 0,013901128  | 0 | N.A. | 0 |
| SPAG16     | -0,206949377 | -0,255578226 | 0 | N.A. | 0 |
| FADS2      | -0,207156084 | 0,037302627  | 0 | N.A. | 0 |
| SCP2       | -0,207290327 | -0,173031591 | 0 | N.A. | 0 |
| CALR       | -0,207446917 | 0,208746589  | 0 | N.A. | 0 |
| HIST2H2AC  | -0,207476409 | -0,306606155 | 0 | N.A. | 0 |
| ARFIP2     | -0,207521207 | 0,01253073   | 0 | N.A. | 0 |
| CBX2       | -0,207537571 | -0,161860894 | 0 | N.A. | 0 |
| SLC35B4    | -0,207615813 | -0,150215976 | 0 | N.A. | 0 |
| PUS3       | -0,207730628 | -0,132633495 | 0 | N.A. | 0 |
| TSPAN7     | -0,207751097 | 0,024290205  | 0 | N.A. | 0 |
| GSTM4      | -0,207974984 | -0,234210693 | 0 | N.A. | 0 |
| GNPDA2     | -0,207981707 | 0,001639673  | 0 | N.A. | 0 |
| AC004540.4 | -0,208045535 | -0,119028173 | 0 | N.A. | 0 |
| COX7A2     | -0,208315924 | -0,086761354 | 0 | N.A. | 0 |
| SAMD5      | -0,208339363 | -0,050851455 | 0 | N.A. | 0 |
| ODAM       | -0,208432868 | 0,015658323  | 0 | N.A. | 0 |
| AMMECR1    | -0,20843353  | 0,164911915  | 0 | N.A. | 0 |
| LRRC26     | -0,208544499 | -0,16008841  | 0 | N.A. | 0 |

|             |              |              |   |      |   |
|-------------|--------------|--------------|---|------|---|
| ABCC4       | -0,208609279 | -0,297633728 | 0 | N.A. | 0 |
| MPI         | -0,208610639 | -0,273478542 | 0 | N.A. | 0 |
| WDR73       | -0,208737227 | -0,129011033 | 0 | N.A. | 0 |
| ERGIC2      | -0,208764639 | 0,034181402  | 0 | N.A. | 0 |
| AC007036.6  | -0,208914875 |              | 0 | N.A. | 0 |
| HOXA11-AS   | -0,209068456 | 0,086572494  | 0 | N.A. | 0 |
| WIPI2       | -0,209225826 | 0,065212316  | 0 | N.A. | 0 |
| GPATCH11    | -0,209362466 | -0,108981967 | 0 | N.A. | 0 |
| TMEM128     | -0,209526551 | -0,208713452 | 0 | N.A. | 0 |
| RP11-544A12 | -0,20961658  | -0,026937458 | 0 | N.A. | 0 |
| XXbac-B135H | -0,209761744 | -0,066776714 | 0 | N.A. | 0 |
| ZNHIT2      | -0,209774214 | -0,277098394 | 0 | N.A. | 0 |
| PXN-AS1     | -0,209857046 | -0,025664792 | 0 | N.A. | 0 |
| THAP4       | -0,209897952 | -0,229032786 | 0 | N.A. | 0 |
| SCRN3       | -0,210411515 | -0,190559986 | 0 | N.A. | 0 |
| ZNF775      | -0,210412623 | -0,139410524 | 0 | N.A. | 0 |
| IQCB1       | -0,210674616 | 0,122322867  | 0 | N.A. | 0 |
| RP11-421L21 | -0,210722153 | -0,256306046 | 0 | N.A. | 0 |
| RAB5C       | -0,21078436  | -0,142206675 | 0 | N.A. | 0 |
| DNAH14      | -0,210790101 | -0,385346471 | 0 | N.A. | 0 |
| GABRA4      | -0,210791976 | -0,045904614 | 0 | N.A. | 0 |
| COX19       | -0,210817975 | -0,051520323 | 0 | N.A. | 0 |
| MLKL        | -0,210827245 | -0,084889357 | 0 | N.A. | 0 |
| SLC7A6OS    | -0,210841198 | 0,156240003  | 0 | N.A. | 0 |
| NDUFA3      | -0,210909233 | -0,426168873 | 0 | N.A. | 0 |
| FAAH        | -0,211044582 | -0,095122552 | 0 | N.A. | 0 |
| GRB2        | -0,211066598 | -0,316380235 | 0 | N.A. | 0 |
| MOK         | -0,211150457 | 0,039514438  | 0 | N.A. | 0 |
| DAXX        | -0,211159448 | -0,206017933 | 0 | N.A. | 0 |
| TMEM192     | -0,211217296 | -0,134093716 | 0 | N.A. | 0 |
| R3HCC1      | -0,21135444  | -0,120649212 | 0 | N.A. | 0 |
| NMT1        | -0,211398681 | -0,128497058 | 0 | N.A. | 0 |
| MDH1B       | -0,211430599 |              | 0 | N.A. | 0 |

|             |              |              |   |      |   |
|-------------|--------------|--------------|---|------|---|
| RP11-77P6.2 | -0,211522894 | -0,232363206 | 0 | N.A. | 0 |
| DFFB        | -0,211616076 | -0,091441247 | 0 | N.A. | 0 |
| UGT8        | -0,2118027   | 0,332305784  | 0 | N.A. | 0 |
| WDR41       | -0,21184838  | -0,427391405 | 0 | N.A. | 0 |
| MCEE        | -0,21185167  | 0,174206649  | 0 | N.A. | 0 |
| GMPR2       | -0,211863297 | -0,132045252 | 0 | N.A. | 0 |
| KCTD6       | -0,211948933 | -0,406656928 | 0 | N.A. | 0 |
| PFN1        | -0,212003836 | -0,426135519 | 0 | N.A. | 0 |
| PXYLP1      | -0,212087053 | -0,391633974 | 0 | N.A. | 0 |
| C17orf58    | -0,212115844 | -0,12216312  | 0 | N.A. | 0 |
| VMA21       | -0,212128429 | -0,267094459 | 0 | N.A. | 0 |
| SNAPC5      | -0,212199522 | -0,339137013 | 0 | N.A. | 0 |
| BPHL        | -0,21225554  | 0,078525479  | 0 | N.A. | 0 |
| STARD3NL    | -0,212438116 | -0,432511072 | 0 | N.A. | 0 |
| CCDC51      | -0,212512315 | -0,140886359 | 0 | N.A. | 0 |
| CYP2W1      | -0,212527006 | -0,043506893 | 0 | N.A. | 0 |
| HM13        | -0,212822785 | 0,293720895  | 0 | N.A. | 0 |
| POGLUT1     | -0,212839094 | -0,14597082  | 0 | N.A. | 0 |
| CAMK1       | -0,212884    | -0,205558146 | 0 | N.A. | 0 |
| RPP21       | -0,212943633 | -0,434131881 | 0 | N.A. | 0 |
| C5orf34     | -0,213142677 | -0,06935674  | 0 | N.A. | 0 |
| BOK-AS1     | -0,213157167 | -0,161312401 | 0 | N.A. | 0 |
| TRA2A       | -0,213165433 | -0,030686546 | 0 | N.A. | 0 |
| YY1         | -0,213182912 | 0,153566067  | 0 | N.A. | 0 |
| METTL12     | -0,213188996 | -0,22289698  | 0 | N.A. | 0 |
| C3orf70     | -0,213368409 | -0,20223635  | 0 | N.A. | 0 |
| OTUB1       | -0,213377393 | 0,37442668   | 0 | N.A. | 0 |
| SMG9        | -0,213490224 | -0,344244002 | 0 | N.A. | 0 |
| MPDU1       | -0,213677374 | 0,03784698   | 0 | N.A. | 0 |
| LRRC58      | -0,213790523 | 0,286523232  | 0 | N.A. | 0 |
| XPA         | -0,214077555 | 0,079187972  | 0 | N.A. | 0 |
| MTRF1       | -0,214094313 | -0,442622827 | 0 | N.A. | 0 |
| AC004381.6  | -0,214132945 | -0,098511226 | 0 | N.A. | 0 |

|             |              |              |   |      |   |
|-------------|--------------|--------------|---|------|---|
| RP11-81H14. | -0,214192889 | -0,012595286 | 0 | N.A. | 0 |
| KCTD3       | -0,214194232 | 0,28284269   | 0 | N.A. | 0 |
| ZNF627      | -0,214222797 | -0,32049758  | 0 | N.A. | 0 |
| DPF1        | -0,214237477 |              | 0 | N.A. | 0 |
| RUFY1       | -0,21424023  | 0,046835484  | 0 | N.A. | 0 |
| ZNF670      | -0,214261961 | -0,235608211 | 0 | N.A. | 0 |
| RNLS        | -0,214282202 | -0,126631266 | 0 | N.A. | 0 |
| PGS1        | -0,214325544 | -0,172048817 | 0 | N.A. | 0 |
| CUL4A       | -0,214556546 | 0,132651919  | 0 | N.A. | 0 |
| SMIM3       | -0,21456797  | -0,261163945 | 0 | N.A. | 0 |
| MAATS1      | -0,214634401 | -0,253510281 | 0 | N.A. | 0 |
| RHBDD3      | -0,21467908  | 0,178968735  | 0 | N.A. | 0 |
| RP11-108M9  | -0,214692012 | 0,078084904  | 0 | N.A. | 0 |
| DECR2       | -0,214717483 | 0,341208566  | 0 | N.A. | 0 |
| ZNF770      | -0,214730009 | -0,285866534 | 0 | N.A. | 0 |
| TTC32       | -0,214788209 | -0,150620091 | 0 | N.A. | 0 |
| IRF3        | -0,215074783 | 0,23517795   | 0 | N.A. | 0 |
| REG3A       | -0,215084986 | 0,006584699  | 0 | N.A. | 0 |
| CAGE1       | -0,215108837 |              | 0 | N.A. | 0 |
| CCDC150     | -0,215233992 | -0,204814212 | 0 | N.A. | 0 |
| DXO         | -0,215238164 | -0,341564685 | 0 | N.A. | 0 |
| MTFR1       | -0,215372236 | -0,304401821 | 0 | N.A. | 0 |
| KIAA1279    | -0,215378023 | -0,08270767  | 0 | N.A. | 0 |
| PPP6C       | -0,21539232  | -0,349489369 | 0 | N.A. | 0 |
| WDR90       | -0,215440987 | 0,02035704   | 0 | N.A. | 0 |
| STK26       | -0,215517491 | -0,160984017 | 0 | N.A. | 0 |
| DNAJC30     | -0,215743887 | -0,296624209 | 0 | N.A. | 0 |
| ZNF691      | -0,215805137 | -0,204616242 | 0 | N.A. | 0 |
| C11orf74    | -0,215895418 | -0,315652156 | 0 | N.A. | 0 |
| ZSCAN12     | -0,215975236 | 0,141973735  | 0 | N.A. | 0 |
| SAYSD1      | -0,216431765 | -0,144985795 | 0 | N.A. | 0 |
| NF2         | -0,216434148 | -0,086879406 | 0 | N.A. | 0 |
| ERGIC3      | -0,216459815 | -0,219455508 | 0 | N.A. | 0 |

|             |              |              |   |      |   |
|-------------|--------------|--------------|---|------|---|
| UPF2        | -0,216465339 | 0,152614056  | 0 | N.A. | 0 |
| TRMT2A      | -0,216561753 | 0,081442194  | 0 | N.A. | 0 |
| GUF1        | -0,216614062 | -0,269974765 | 0 | N.A. | 0 |
| STK33       | -0,216626021 |              | 0 | N.A. | 0 |
| TEX261      | -0,216713041 | -0,055459307 | 0 | N.A. | 0 |
| COLGALT1    | -0,216814434 | 0,164129435  | 0 | N.A. | 0 |
| AE000662.93 | -0,216927108 | 0,111157156  | 0 | N.A. | 0 |
| PODXL2      | -0,216990102 | -0,046518477 | 0 | N.A. | 0 |
| NSDHL       | -0,217093424 | 0,157459579  | 0 | N.A. | 0 |
| SLC12A8     | -0,217157264 | -0,149460061 | 0 | N.A. | 0 |
| ZNF330      | -0,217233071 | -0,24804951  | 0 | N.A. | 0 |
| MCUR1       | -0,21723756  | 0,054355072  | 0 | N.A. | 0 |
| FREM1       | -0,217318526 | -0,071928338 | 0 | N.A. | 0 |
| SPRY1       | -0,217376446 | 0,226837555  | 0 | N.A. | 0 |
| SRA1        | -0,217479641 | -0,283530558 | 0 | N.A. | 0 |
| DHX33       | -0,217688242 | -0,056869112 | 0 | N.A. | 0 |
| OXGR1       | -0,217714173 | -0,173812636 | 0 | N.A. | 0 |
| RP11-660L16 | -0,217750606 | -0,19262926  | 0 | N.A. | 0 |
| NHLRC2      | -0,217809368 | 0,245485365  | 0 | N.A. | 0 |
| SCO2        | -0,217823249 | 0,291504062  | 0 | N.A. | 0 |
| DHX36       | -0,217892695 | 0,067642583  | 0 | N.A. | 0 |
| RNF34       | -0,217983646 | -0,094856845 | 0 | N.A. | 0 |
| KCTD16      | -0,217997317 | -0,078052946 | 0 | N.A. | 0 |
| URI1        | -0,218069881 | 0,101028827  | 0 | N.A. | 0 |
| SPINK2      | -0,218455928 | -0,276857145 | 0 | N.A. | 0 |
| SORBS3      | -0,218507509 | -0,041840263 | 0 | N.A. | 0 |
| ABI2        | -0,218563817 | -0,394244745 | 0 | N.A. | 0 |
| FDPS        | -0,218613961 | 0,080274163  | 0 | N.A. | 0 |
| PTS         | -0,218678465 | -0,038355404 | 0 | N.A. | 0 |
| PPIL4       | -0,218715476 | 0,16514939   | 0 | N.A. | 0 |
| DNM1L       | -0,218729675 | 0,012165405  | 0 | N.A. | 0 |
| AMBP        | -0,218748452 | -0,207504048 | 0 | N.A. | 0 |
| HEATR3      | -0,218820549 | 0,120480041  | 0 | N.A. | 0 |

|             |              |              |   |      |   |
|-------------|--------------|--------------|---|------|---|
| USP3-AS1    | -0,218845841 | 0,125243342  | 0 | N.A. | 0 |
| OTC         | -0,218941729 | 0,073284118  | 0 | N.A. | 0 |
| CABIN1      | -0,218983227 | 0,042911232  | 0 | N.A. | 0 |
| CPSF3L      | -0,218991111 | -0,056630714 | 0 | N.A. | 0 |
| CEL         | -0,219001204 | -0,25570179  | 0 | N.A. | 0 |
| AMZ2        | -0,219029055 | -0,294344119 | 0 | N.A. | 0 |
| AP000275.65 | -0,219154286 |              | 0 | N.A. | 0 |
| CEP152      | -0,219203562 | 0,073441203  | 0 | N.A. | 0 |
| C9orf24     | -0,219216492 | -0,192354139 | 0 | N.A. | 0 |
| CROT        | -0,219229821 | 0,106932922  | 0 | N.A. | 0 |
| MEAF6       | -0,219241677 | -0,082982877 | 0 | N.A. | 0 |
| ID3         | -0,219243004 | -0,373603274 | 0 | N.A. | 0 |
| TNFAIP8L1   | -0,219393149 | -0,380499445 | 0 | N.A. | 0 |
| LAMB1       | -0,219563333 | -0,011000069 | 0 | N.A. | 0 |
| MPV17       | -0,219653394 | -0,255694853 | 0 | N.A. | 0 |
| SLC25A38    | -0,219671997 | -0,267259418 | 0 | N.A. | 0 |
| AC016700.5  | -0,219745586 | -0,152416213 | 0 | N.A. | 0 |
| GARS        | -0,219810808 | -0,038500567 | 0 | N.A. | 0 |
| RIBC2       | -0,219874027 | -0,16392197  | 0 | N.A. | 0 |
| SAMHD1      | -0,219927217 | -0,31573247  | 0 | N.A. | 0 |
| GALNT18     | -0,219991378 | 0,071031556  | 0 | N.A. | 0 |
| AC004069.2  | -0,220077502 | -0,286545251 | 0 | N.A. | 0 |
| KDM8        | -0,220828462 | 0,006164755  | 0 | N.A. | 0 |
| ZP2         | -0,221026306 | -0,049038601 | 0 | N.A. | 0 |
| COX18       | -0,221032953 | -0,240978086 | 0 | N.A. | 0 |
| TBXAS1      | -0,221087974 | -0,020882836 | 0 | N.A. | 0 |
| NVL         | -0,221155624 | -0,124745114 | 0 | N.A. | 0 |
| ZNF622      | -0,221198819 | 0,099431127  | 0 | N.A. | 0 |
| STK16       | -0,221277848 | -0,091662695 | 0 | N.A. | 0 |
| COMMD3      | -0,221280992 | 0,036680346  | 0 | N.A. | 0 |
| CTD-2532N2  | -0,221310061 |              | 0 | N.A. | 0 |
| ZNF738      | -0,221522993 | -0,366464637 | 0 | N.A. | 0 |
| MMACHC      | -0,221626957 | -0,367178396 | 0 | N.A. | 0 |

|              |              |              |   |      |   |
|--------------|--------------|--------------|---|------|---|
| NRGN         | -0,22165919  | -0,210035124 | 0 | N.A. | 0 |
| RHOT2        | -0,221721912 | 0,222714658  | 0 | N.A. | 0 |
| FAM201A      | -0,221798141 | -0,253705942 | 0 | N.A. | 0 |
| GIPC2        | -0,221849059 | -0,301572782 | 0 | N.A. | 0 |
| NAT14        | -0,221867396 | 0,339481608  | 0 | N.A. | 0 |
| EVI2A        | -0,221972534 | -0,321712878 | 0 | N.A. | 0 |
| PDDC1        | -0,221983076 | -0,112790409 | 0 | N.A. | 0 |
| ELP3         | -0,221985888 | -0,166824626 | 0 | N.A. | 0 |
| MAGEA11      | -0,221989542 | -0,283407726 | 0 | N.A. | 0 |
| CHURC1       | -0,222027029 | -0,271776409 | 0 | N.A. | 0 |
| SEC23B       | -0,222122904 | -0,103637216 | 0 | N.A. | 0 |
| IFT57        | -0,222154662 | -0,236608527 | 0 | N.A. | 0 |
| ZNF724P      | -0,222156945 | 0,007284973  | 0 | N.A. | 0 |
| TTC23        | -0,222219266 | -0,110076071 | 0 | N.A. | 0 |
| EMC6         | -0,222273011 | -0,098826135 | 0 | N.A. | 0 |
| AP006222.2   | -0,222313601 | -0,248979881 | 0 | N.A. | 0 |
| PIF1         | -0,222428315 | -0,053647963 | 0 | N.A. | 0 |
| DBT          | -0,222602408 | -0,099273609 | 0 | N.A. | 0 |
| AC093388.3   | -0,222631867 | -0,176848757 | 0 | N.A. | 0 |
| RP11-438L19  | -0,222644074 | 0,327847792  | 0 | N.A. | 0 |
| SLC35B1      | -0,22265838  | -0,058178175 | 0 | N.A. | 0 |
| LINC01011    | -0,222798418 | -0,116835401 | 0 | N.A. | 0 |
| KB-431C1.4   | -0,222989388 | -0,097599328 | 0 | N.A. | 0 |
| MOCS3        | -0,223001387 | -0,159018277 | 0 | N.A. | 0 |
| RP3-509I19.1 | -0,223136712 | 0,021350318  | 0 | N.A. | 0 |
| FAM229B      | -0,223206456 | -0,21183508  | 0 | N.A. | 0 |
| SLC1A4       | -0,223362632 | -0,193356738 | 0 | N.A. | 0 |
| GPR143       | -0,223461148 | 0,056922246  | 0 | N.A. | 0 |
| LINC01106    | -0,223464002 | -0,019347268 | 0 | N.A. | 0 |
| GSTT2B       | -0,223510675 | -0,219977837 | 0 | N.A. | 0 |
| RNF214       | -0,223702471 | -0,090698007 | 0 | N.A. | 0 |
| YARS         | -0,223936057 | -0,19463655  | 0 | N.A. | 0 |
| NUP160       | -0,224010464 | -0,077743988 | 0 | N.A. | 0 |



|             |              |              |   |      |   |
|-------------|--------------|--------------|---|------|---|
| GPR150      | -0,224064608 | -0,117489213 | 0 | N.A. | 0 |
| PIGL        | -0,224084312 | -0,204590762 | 0 | N.A. | 0 |
| POLR1A      | -0,224107164 | -0,15047648  | 0 | N.A. | 0 |
| PROB1       | -0,224113592 | 0,140690359  | 0 | N.A. | 0 |
| TMPO-AS1    | -0,224156899 | -0,321511634 | 0 | N.A. | 0 |
| PTCD1       | -0,224273269 | -0,10572009  | 0 | N.A. | 0 |
| CPNE6       | -0,224288291 | -0,160372014 | 0 | N.A. | 0 |
| EEA1        | -0,224563775 | 0,052824639  | 0 | N.A. | 0 |
| SELENBP1    | -0,224592217 | -0,096225786 | 0 | N.A. | 0 |
| TEX10       | -0,224645578 | -0,270105467 | 0 | N.A. | 0 |
| CRYM        | -0,224671027 | 0,001774965  | 0 | N.A. | 0 |
| PAXIP1-AS1  | -0,224741036 | -0,028852185 | 0 | N.A. | 0 |
| SLC2A8      | -0,224844525 | -0,031599852 | 0 | N.A. | 0 |
| B4GALT7     | -0,224929052 | 0,195532299  | 0 | N.A. | 0 |
| GOPC        | -0,225154698 | 0,018733775  | 0 | N.A. | 0 |
| RPRD1A      | -0,225412529 | 0,126829336  | 0 | N.A. | 0 |
| SCRN2       | -0,225455102 | 0,212165852  | 0 | N.A. | 0 |
| PAIP1       | -0,225719347 | -0,029876274 | 0 | N.A. | 0 |
| CTB-58E17.1 | -0,225919164 | 0,150499259  | 0 | N.A. | 0 |
| ZNF714      | -0,225969318 | -0,302381165 | 0 | N.A. | 0 |
| C19orf57    | -0,226056212 | 0,061196569  | 0 | N.A. | 0 |
| SRSF8       | -0,226204776 | -0,119882264 | 0 | N.A. | 0 |
| SLC25A14    | -0,226309002 | -0,411575052 | 0 | N.A. | 0 |
| MEX3A       | -0,226580668 | -0,196365671 | 0 | N.A. | 0 |
| MPHOSPH9    | -0,227014133 | -0,072030896 | 0 | N.A. | 0 |
| C2          | -0,227057444 | -0,15487401  | 0 | N.A. | 0 |
| KRI1        | -0,227103091 | 0,203316231  | 0 | N.A. | 0 |
| ERI1        | -0,227373664 | -0,088303027 | 0 | N.A. | 0 |
| BLOC1S4     | -0,227395372 | -0,009477692 | 0 | N.A. | 0 |
| RHOA        | -0,227442388 | -0,294505273 | 0 | N.A. | 0 |
| TMEM206     | -0,227451158 | -0,162204378 | 0 | N.A. | 0 |
| ZKSCAN4     | -0,227520121 | -0,031718199 | 0 | N.A. | 0 |
| MTERF1      | -0,227572399 | -0,321701215 | 0 | N.A. | 0 |

|             |              |              |   |      |   |
|-------------|--------------|--------------|---|------|---|
| C11orf1     | -0,227658113 | -0,369213563 | 0 | N.A. | 0 |
| ETF1        | -0,227717326 | -0,184587346 | 0 | N.A. | 0 |
| LINC01091   | -0,227791156 | -0,314857644 | 0 | N.A. | 0 |
| ACO1        | -0,227907227 | -0,050091045 | 0 | N.A. | 0 |
| TMTC4       | -0,228085903 | 0,302582174  | 0 | N.A. | 0 |
| CTD-237103  | -0,228105464 | 0,083301078  | 0 | N.A. | 0 |
| ISCA1       | -0,228190653 | -0,234774457 | 0 | N.A. | 0 |
| POT1        | -0,228484438 | -0,287658386 | 0 | N.A. | 0 |
| E2F3        | -0,228547118 | -0,167324984 | 0 | N.A. | 0 |
| ERCC4       | -0,228594857 | -0,062031108 | 0 | N.A. | 0 |
| LINC00261   | -0,228620319 | -0,101518177 | 0 | N.A. | 0 |
| RAD51D      | -0,228625356 | 0,092257599  | 0 | N.A. | 0 |
| PREP        | -0,228789477 | 0,174552324  | 0 | N.A. | 0 |
| GNL3L       | -0,228860764 | -0,315102642 | 0 | N.A. | 0 |
| SERPINA6    | -0,228922512 | 0,060687742  | 0 | N.A. | 0 |
| ABCD3       | -0,229168057 | 0,375428557  | 0 | N.A. | 0 |
| SOX2        | -0,229225194 | -0,139275941 | 0 | N.A. | 0 |
| PATZ1       | -0,229343148 | -0,317562219 | 0 | N.A. | 0 |
| AC002310.12 | -0,229369262 | 0,036190273  | 0 | N.A. | 0 |
| LSM1        | -0,229549303 | 0,081035592  | 0 | N.A. | 0 |
| MRGBP       | -0,229563398 | 0,17906085   | 0 | N.A. | 0 |
| ZMAT2       | -0,229591643 | -0,471432629 | 0 | N.A. | 0 |
| SLC25A26    | -0,229619688 | -0,154388088 | 0 | N.A. | 0 |
| PRPF8       | -0,229662342 | 0,119133609  | 0 | N.A. | 0 |
| SETD6       | -0,229703041 | -0,065700922 | 0 | N.A. | 0 |
| SRSF4       | -0,229801682 | 0,112361021  | 0 | N.A. | 0 |
| RSAD1       | -0,229867363 | -0,023263296 | 0 | N.A. | 0 |
| MMS19       | -0,229901781 | 0,04734095   | 0 | N.A. | 0 |
| SCFD2       | -0,230094105 | -0,24704693  | 0 | N.A. | 0 |
| SHQ1        | -0,230106463 | -0,413572609 | 0 | N.A. | 0 |
| GFM2        | -0,230171123 | -0,129898128 | 0 | N.A. | 0 |
| CYTL1       | -0,230176819 |              | 0 | N.A. | 0 |
| LCMT1       | -0,230185803 | -0,199014673 | 0 | N.A. | 0 |

|             |              |              |   |      |   |
|-------------|--------------|--------------|---|------|---|
| RAD54B      | -0,23023778  | -0,258654815 | 0 | N.A. | 0 |
| CNTNAP2     | -0,23024422  | -0,06745628  | 0 | N.A. | 0 |
| UBA6-AS1    | -0,230346621 | -0,339562172 | 0 | N.A. | 0 |
| CCDC163P    | -0,230356114 | -0,235708423 | 0 | N.A. | 0 |
| FASTKD5     | -0,230378405 | 0,038296906  | 0 | N.A. | 0 |
| DHX30       | -0,230461197 | -0,136188035 | 0 | N.A. | 0 |
| B4GALT3     | -0,23066153  | -0,179430141 | 0 | N.A. | 0 |
| SPATA5L1    | -0,230789295 | -0,061956339 | 0 | N.A. | 0 |
| LEF1        | -0,230814264 | -0,179247869 | 0 | N.A. | 0 |
| GSTP1       | -0,230976545 | -0,144501782 | 0 | N.A. | 0 |
| GSTZ1       | -0,230995674 | -0,258434396 | 0 | N.A. | 0 |
| TMEM138     | -0,231018164 | -0,045050739 | 0 | N.A. | 0 |
| FAM120C     | -0,231066025 | -0,088145362 | 0 | N.A. | 0 |
| MYL5        | -0,231158387 | -0,258096201 | 0 | N.A. | 0 |
| RARS2       | -0,231272064 | -0,068311958 | 0 | N.A. | 0 |
| USE1        | -0,23134058  | -0,515269125 | 0 | N.A. | 0 |
| SNRNP35     | -0,231345794 | -0,157632581 | 0 | N.A. | 0 |
| CEP63       | -0,231547054 | -0,097284437 | 0 | N.A. | 0 |
| GTPBP6      | -0,231653028 | -0,14113289  | 0 | N.A. | 0 |
| PALD1       | -0,231684151 | -0,145077243 | 0 | N.A. | 0 |
| FASTKD3     | -0,23171409  | -0,129738322 | 0 | N.A. | 0 |
| RSRC2       | -0,231788768 | -0,205912354 | 0 | N.A. | 0 |
| HMGA2       | -0,231903257 | -0,059043457 | 0 | N.A. | 0 |
| EFCC1       | -0,231966647 | -0,06380488  | 0 | N.A. | 0 |
| GTF3C3      | -0,232051142 | 0,127107028  | 0 | N.A. | 0 |
| DDX11       | -0,232098275 | 0,012922572  | 0 | N.A. | 0 |
| BCL2L10     | -0,232223994 | -0,426269762 | 0 | N.A. | 0 |
| ICE2        | -0,23230479  | -0,243561053 | 0 | N.A. | 0 |
| METTL2B     | -0,232368485 | -0,326784414 | 0 | N.A. | 0 |
| RP11-727F15 | -0,232536746 | 0,0095814    | 0 | N.A. | 0 |
| NEK4        | -0,232671458 | -0,283523082 | 0 | N.A. | 0 |
| IFT81       | -0,232791984 | -0,075901372 | 0 | N.A. | 0 |
| RP11-176H8  | -0,232860784 | -0,352370734 | 0 | N.A. | 0 |

|             |              |              |   |      |   |
|-------------|--------------|--------------|---|------|---|
| TIMM22      | -0,233105814 | -0,078135211 | 0 | N.A. | 0 |
| DDX19A      | -0,233146349 | 0,265832947  | 0 | N.A. | 0 |
| MDN1        | -0,233162631 | -0,02830413  | 0 | N.A. | 0 |
| CTD-2501E16 | -0,233162838 | -0,096918252 | 0 | N.A. | 0 |
| LRRC61      | -0,233166632 | -0,302098627 | 0 | N.A. | 0 |
| USP21       | -0,233224681 | -0,058624626 | 0 | N.A. | 0 |
| CMTM2       | -0,23326535  | 0,134851525  | 0 | N.A. | 0 |
| HAUS2       | -0,233311657 | -0,166136102 | 0 | N.A. | 0 |
| C12orf43    | -0,233338788 | 0,019820914  | 0 | N.A. | 0 |
| ZSCAN5A     | -0,233375199 | -0,070380282 | 0 | N.A. | 0 |
| ZNF93       | -0,233412212 | -0,322629907 | 0 | N.A. | 0 |
| CMBL        | -0,233433905 | -0,041573649 | 0 | N.A. | 0 |
| ZBED8       | -0,233510477 | 0,053985294  | 0 | N.A. | 0 |
| ST8SIA6-AS1 | -0,233597244 |              | 0 | N.A. | 0 |
| LIG3        | -0,233646721 | -0,124364928 | 0 | N.A. | 0 |
| IMMP2L      | -0,233706802 | -0,430365832 | 0 | N.A. | 0 |
| VPS26A      | -0,233803356 | -0,234952328 | 0 | N.A. | 0 |
| CPNE7       | -0,233805331 | -0,197058403 | 0 | N.A. | 0 |
| FAM71E1     | -0,233917251 | -0,302996993 | 0 | N.A. | 0 |
| MAT1A       | -0,233996396 | -0,072800147 | 0 | N.A. | 0 |
| SNHG9       | -0,234145611 | -0,126932463 | 0 | N.A. | 0 |
| WDR83OS     | -0,234279318 | -0,231571037 | 0 | N.A. | 0 |
| STUB1       | -0,2343621   | 0,009003248  | 0 | N.A. | 0 |
| CDC27       | -0,234418434 | -0,168266383 | 0 | N.A. | 0 |
| PRDM5       | -0,234517266 | 0,106157554  | 0 | N.A. | 0 |
| TTC13       | -0,234551312 | 0,043967738  | 0 | N.A. | 0 |
| C8orf76     | -0,234562222 | 0,174004376  | 0 | N.A. | 0 |
| TMEM180     | -0,234565945 | -0,108409858 | 0 | N.A. | 0 |
| ST20        | -0,234741046 | -0,341140316 | 0 | N.A. | 0 |
| ZNF48       | -0,234831956 | -0,080331918 | 0 | N.A. | 0 |
| ASNSD1      | -0,234990956 | -0,429039886 | 0 | N.A. | 0 |
| SFT2D1      | -0,235003601 | 0,081321093  | 0 | N.A. | 0 |
| LRP3        | -0,235143327 | -0,208998675 | 0 | N.A. | 0 |

|             |              |              |   |      |   |
|-------------|--------------|--------------|---|------|---|
| NIPSNAP3A   | -0,235166559 | -0,24045707  | 0 | N.A. | 0 |
| TMX4        | -0,235188299 | -0,009323192 | 0 | N.A. | 0 |
| CEP41       | -0,235234325 | -0,259885758 | 0 | N.A. | 0 |
| RPAP2       | -0,235259348 | -0,13653263  | 0 | N.A. | 0 |
| NUP62       | -0,235386903 | -0,199718663 | 0 | N.A. | 0 |
| FASTK       | -0,235440067 | 0,078349656  | 0 | N.A. | 0 |
| FAM92A1     | -0,23549009  | -0,422887443 | 0 | N.A. | 0 |
| CPSF2       | -0,235557056 | -0,035810178 | 0 | N.A. | 0 |
| RSU1        | -0,235701273 | -0,293344997 | 0 | N.A. | 0 |
| NUDT22      | -0,235726469 | -0,065829065 | 0 | N.A. | 0 |
| AC093323.3  | -0,235837134 | -0,033966431 | 0 | N.A. | 0 |
| PSMB9       | -0,236055445 | -0,407226064 | 0 | N.A. | 0 |
| E2F2        | -0,236077845 | -0,24095714  | 0 | N.A. | 0 |
| PRAC1       | -0,236155236 | -0,378627583 | 0 | N.A. | 0 |
| KRTCAP2     | -0,236162693 | 0,108469508  | 0 | N.A. | 0 |
| MTRF1L      | -0,23618611  | -0,095758773 | 0 | N.A. | 0 |
| GPR89A      | -0,236362233 | 0,112299018  | 0 | N.A. | 0 |
| TCF3        | -0,236499705 | 0,300010136  | 0 | N.A. | 0 |
| TPM2        | -0,236588386 | -0,280144908 | 0 | N.A. | 0 |
| TAF8        | -0,236591986 | 0,016318747  | 0 | N.A. | 0 |
| RASD1       | -0,236615704 | -0,15640324  | 0 | N.A. | 0 |
| XPO5        | -0,236852927 | -0,046962977 | 0 | N.A. | 0 |
| CCDC115     | -0,236870372 | -0,190460123 | 0 | N.A. | 0 |
| GPI         | -0,236972252 | -0,178334225 | 0 | N.A. | 0 |
| STRADB      | -0,237074145 | -0,291987422 | 0 | N.A. | 0 |
| CCDC138     | -0,237096419 | -0,196447741 | 0 | N.A. | 0 |
| HIST1H1B    | -0,237146239 | -0,368797211 | 0 | N.A. | 0 |
| ZSCAN16-AS1 | -0,237467546 | -0,320219961 | 0 | N.A. | 0 |
| HYPK        | -0,237506457 | -0,029583725 | 0 | N.A. | 0 |
| SPNS1       | -0,237558592 | 0,201063575  | 0 | N.A. | 0 |
| NUCB2       | -0,237581725 | 0,031405332  | 0 | N.A. | 0 |
| SDR39U1     | -0,237590797 | -0,132428926 | 0 | N.A. | 0 |
| XRCC4       | -0,237607508 | -0,14449852  | 0 | N.A. | 0 |

|            |              |              |   |      |   |
|------------|--------------|--------------|---|------|---|
| DEPTOR     | -0,237612144 | -0,009315114 | 0 | N.A. | 0 |
| AAR2       | -0,237670859 | 0,036050461  | 0 | N.A. | 0 |
| RCC2       | -0,237689539 | 0,010125641  | 0 | N.A. | 0 |
| SNHG8      | -0,237788408 | -0,278231036 | 0 | N.A. | 0 |
| TTC12      | -0,237851593 | -0,166365568 | 0 | N.A. | 0 |
| RP11-728G1 | -0,237890848 | 0,008933511  | 0 | N.A. | 0 |
| SART1      | -0,237994242 | -0,026959674 | 0 | N.A. | 0 |
| SMS        | -0,238031288 | -0,508674266 | 0 | N.A. | 0 |
| ARRDC1-AS1 | -0,23847582  | -0,0288482   | 0 | N.A. | 0 |
| RPAIN      | -0,238505847 | -0,240073472 | 0 | N.A. | 0 |
| FAM72C     | -0,238533249 | -0,252833844 | 0 | N.A. | 0 |
| LGR5       | -0,238671402 | -0,047819679 | 0 | N.A. | 0 |
| ZNF174     | -0,238857933 | -0,08373917  | 0 | N.A. | 0 |
| KIAA1257   | -0,238906987 | -0,206613932 | 0 | N.A. | 0 |
| SNRNP48    | -0,238983349 | -0,078336246 | 0 | N.A. | 0 |
| CASC21     | -0,239035732 | -0,043024243 | 0 | N.A. | 0 |
| ABCB8      | -0,239129948 | 0,106410733  | 0 | N.A. | 0 |
| TUBD1      | -0,239191288 | -0,206904741 | 0 | N.A. | 0 |
| SMARCAD1   | -0,239265253 | -0,319411908 | 0 | N.A. | 0 |
| GMCL1      | -0,239392235 | -0,234536643 | 0 | N.A. | 0 |
| C2orf76    | -0,239469593 | -0,234757378 | 0 | N.A. | 0 |
| ARL13B     | -0,239482919 | -0,234528632 | 0 | N.A. | 0 |
| TMEM216    | -0,239589718 | -0,010761562 | 0 | N.A. | 0 |
| TMC3-AS1   | -0,239976027 | -0,313384893 | 0 | N.A. | 0 |
| MGC32805   | -0,240120796 | -0,153535754 | 0 | N.A. | 0 |
| MORF4L2    | -0,240233644 | -0,285612179 | 0 | N.A. | 0 |
| UBXN8      | -0,240260499 | 0,104398351  | 0 | N.A. | 0 |
| TMEM55A    | -0,240321309 | -0,230363442 | 0 | N.A. | 0 |
| ACAD8      | -0,240434927 | -0,173226989 | 0 | N.A. | 0 |
| ABHD14A    | -0,240437248 | -0,394654328 | 0 | N.A. | 0 |
| ATPAF2     | -0,240460648 | -0,051646413 | 0 | N.A. | 0 |
| SMTNL2     | -0,240524448 | -0,000122524 | 0 | N.A. | 0 |
| IP6K2      | -0,240589254 | 0,096591588  | 0 | N.A. | 0 |

|             |              |              |   |      |   |
|-------------|--------------|--------------|---|------|---|
| SDHAF2      | -0,240639166 | -0,196113078 | 0 | N.A. | 0 |
| NUDT19      | -0,240821559 | -0,196754216 | 0 | N.A. | 0 |
| MKS1        | -0,241151986 | -0,173210143 | 0 | N.A. | 0 |
| TOMM70A     | -0,241238517 | -0,42780928  | 0 | N.A. | 0 |
| UTP15       | -0,24126629  | -0,372639406 | 0 | N.A. | 0 |
| C17orf80    | -0,241483034 | 0,099360868  | 0 | N.A. | 0 |
| FAM200B     | -0,24177109  | -0,3217477   | 0 | N.A. | 0 |
| PITPNA-AS1  | -0,241830433 | -0,202715108 | 0 | N.A. | 0 |
| COG2        | -0,241855019 | 0,028912873  | 0 | N.A. | 0 |
| SREK1       | -0,241869134 | 0,144489638  | 0 | N.A. | 0 |
| ZNF599      | -0,24193627  | -0,266963303 | 0 | N.A. | 0 |
| RP11-38C17. | -0,242133204 | -0,054214261 | 0 | N.A. | 0 |
| TXNL4B      | -0,242410813 | -0,157144498 | 0 | N.A. | 0 |
| APOLD1      | -0,242462431 | -0,259686756 | 0 | N.A. | 0 |
| CALML3      | -0,242465986 | 0,063931845  | 0 | N.A. | 0 |
| CCDC109B    | -0,242545495 | -0,212095014 | 0 | N.A. | 0 |
| ZNF74       | -0,242565361 | -0,223694482 | 0 | N.A. | 0 |
| SCOC        | -0,242621324 | -0,126095384 | 0 | N.A. | 0 |
| IL27RA      | -0,242711041 | -0,349593154 | 0 | N.A. | 0 |
| TUBGCP2     | -0,242758648 | 0,120964545  | 0 | N.A. | 0 |
| ANAPC4      | -0,242814202 | 0,072376533  | 0 | N.A. | 0 |
| SCML2       | -0,242834927 | 0,063247496  | 0 | N.A. | 0 |
| DNAJB11     | -0,242906167 | 0,311320617  | 0 | N.A. | 0 |
| IRAK1BP1    | -0,243156744 | -0,474845595 | 0 | N.A. | 0 |
| LARP1       | -0,243265365 | 0,201659183  | 0 | N.A. | 0 |
| HAAO        | -0,243268117 | -0,287683876 | 0 | N.A. | 0 |
| HLTF        | -0,243300526 | -0,44902164  | 0 | N.A. | 0 |
| KIAA1586    | -0,24358768  | 0,030292315  | 0 | N.A. | 0 |
| ST7L        | -0,243622616 | -0,176418557 | 0 | N.A. | 0 |
| CUTC        | -0,24367434  | -0,169929812 | 0 | N.A. | 0 |
| SUPT20H     | -0,243694572 | 0,10548445   | 0 | N.A. | 0 |
| MTA2        | -0,243863931 | -0,194021512 | 0 | N.A. | 0 |
| C12orf57    | -0,243972426 | -0,423614027 | 0 | N.A. | 0 |

|             |              |              |   |      |   |
|-------------|--------------|--------------|---|------|---|
| TNPO2       | -0,244177846 | -0,132036507 | 0 | N.A. | 0 |
| TMED2       | -0,244213661 | -0,106836205 | 0 | N.A. | 0 |
| PEX5        | -0,244546866 | 0,061893147  | 0 | N.A. | 0 |
| PHYHIPL     | -0,244765523 | -0,10920217  | 0 | N.A. | 0 |
| RNFT2       | -0,244777309 | -0,163952205 | 0 | N.A. | 0 |
| C14orf80    | -0,244897928 | -0,311455471 | 0 | N.A. | 0 |
| ASXL1       | -0,244959933 | -0,192184157 | 0 | N.A. | 0 |
| NARF        | -0,245019011 | 0,048654876  | 0 | N.A. | 0 |
| ASGR2       | -0,245030377 | -0,087969201 | 0 | N.A. | 0 |
| FAHD1       | -0,245074897 | -0,117225745 | 0 | N.A. | 0 |
| SYNE4       | -0,245101159 | 0,089926191  | 0 | N.A. | 0 |
| LARS2       | -0,245341361 | -0,087948449 | 0 | N.A. | 0 |
| HOXA3       | -0,245545798 | -0,230227324 | 0 | N.A. | 0 |
| PPP4C       | -0,24566022  | -0,064982131 | 0 | N.A. | 0 |
| SMIM8       | -0,245677435 | -0,007545665 | 0 | N.A. | 0 |
| C20orf96    | -0,245749956 | -0,193607616 | 0 | N.A. | 0 |
| FOXA2       | -0,245854319 | 0,123484088  | 0 | N.A. | 0 |
| ZNF789      | -0,245875569 | -0,172621567 | 0 | N.A. | 0 |
| NRD1        | -0,245909446 | 0,350119903  | 0 | N.A. | 0 |
| NME7        | -0,246316572 | -0,117110679 | 0 | N.A. | 0 |
| PPP2R2C     | -0,246345472 | -0,292917887 | 0 | N.A. | 0 |
| PAK6        | -0,246348594 | 0,014994264  | 0 | N.A. | 0 |
| CASP1       | -0,246378675 | -0,41134328  | 0 | N.A. | 0 |
| EPRS        | -0,246467213 | 0,274515705  | 0 | N.A. | 0 |
| CSRP2BP     | -0,246514886 | 0,035764432  | 0 | N.A. | 0 |
| ALDH3A1     | -0,246616089 | -0,316672322 | 0 | N.A. | 0 |
| C12orf66    | -0,246654777 | -0,226320944 | 0 | N.A. | 0 |
| CHTF8       | -0,246662904 | 0,050487283  | 0 | N.A. | 0 |
| CTB-31O20.2 | -0,246798475 | -0,033377671 | 0 | N.A. | 0 |
| EMC2        | -0,246988129 | -0,21382386  | 0 | N.A. | 0 |
| SATB2       | -0,247036678 | -0,07748086  | 0 | N.A. | 0 |
| STOX1       | -0,247087446 | -0,19281333  | 0 | N.A. | 0 |
| ORC2        | -0,247122258 | 0,047256755  | 0 | N.A. | 0 |



|             |              |              |   |      |   |
|-------------|--------------|--------------|---|------|---|
| RP3-522D1.1 | -0,247132412 | -0,465475982 | 0 | N.A. | 0 |
| SYNPR       | -0,247205906 |              | 0 | N.A. | 0 |
| CEP295      | -0,247269675 | -0,146699652 | 0 | N.A. | 0 |
| FAM189B     | -0,24731632  | -0,206728848 | 0 | N.A. | 0 |
| ZNF207      | -0,247371076 | 0,325308865  | 0 | N.A. | 0 |
| RRP36       | -0,247486717 | 0,10293363   | 0 | N.A. | 0 |
| IGF2        | -0,247682908 | 0,086477932  | 0 | N.A. | 0 |
| DTNBP1      | -0,247688531 | 0,013679149  | 0 | N.A. | 0 |
| TACR2       | -0,247693186 | 0,140077371  | 0 | N.A. | 0 |
| ZNF496      | -0,247707497 | -0,018078565 | 0 | N.A. | 0 |
| MLLT10      | -0,247739777 | 0,052263169  | 0 | N.A. | 0 |
| DHX57       | -0,24781448  | 0,113472846  | 0 | N.A. | 0 |
| MAP7        | -0,248130778 | 0,02918114   | 0 | N.A. | 0 |
| C9orf64     | -0,248219771 | -0,34696533  | 0 | N.A. | 0 |
| NACA2       | -0,248468978 | -0,430831095 | 0 | N.A. | 0 |
| POLD3       | -0,248533169 | -0,071212167 | 0 | N.A. | 0 |
| TXNRD3      | -0,248739624 | -0,017798132 | 0 | N.A. | 0 |
| MKRN2       | -0,248742947 | -0,248967471 | 0 | N.A. | 0 |
| TMEM231     | -0,248836663 | 0,009729617  | 0 | N.A. | 0 |
| EVA1A       | -0,248911462 | -0,082091863 | 0 | N.A. | 0 |
| GLYATL1     | -0,248911673 | -0,360889148 | 0 | N.A. | 0 |
| RBM10       | -0,249512326 | 0,007050914  | 0 | N.A. | 0 |
| MTBP        | -0,249621508 | -0,004948634 | 0 | N.A. | 0 |
| ARL9        | -0,249634459 | -0,068818324 | 0 | N.A. | 0 |
| GEMIN5      | -0,250073388 | -0,315665754 | 0 | N.A. | 0 |
| ALG14       | -0,250078339 | 0,054633015  | 0 | N.A. | 0 |
| ZNF239      | -0,250277327 | -0,172669425 | 0 | N.A. | 0 |
| SMU1        | -0,250291673 | -0,238323999 | 0 | N.A. | 0 |
| DCK         | -0,250294556 | -0,375166552 | 0 | N.A. | 0 |
| MEF2BNB     | -0,250676962 | -0,122368771 | 0 | N.A. | 0 |
| CLPTM1L     | -0,250800914 | 0,312209604  | 0 | N.A. | 0 |
| FKBP10      | -0,250838906 | 0,093517076  | 0 | N.A. | 0 |
| BRK1        | -0,250863833 | -0,30356669  | 0 | N.A. | 0 |

|             |              |              |   |      |   |
|-------------|--------------|--------------|---|------|---|
| MTHFD1L     | -0,250886142 | -0,243288013 | 0 | N.A. | 0 |
| NMNAT3      | -0,250965125 | -0,23534995  | 0 | N.A. | 0 |
| ATAD3B      | -0,250970189 | -0,091359317 | 0 | N.A. | 0 |
| POLR3E      | -0,250982006 | -0,038643945 | 0 | N.A. | 0 |
| MPC1        | -0,2510257   | -0,209674567 | 0 | N.A. | 0 |
| THAP11      | -0,251092134 | -0,162809976 | 0 | N.A. | 0 |
| ELOF1       | -0,251170453 | -0,021245414 | 0 | N.A. | 0 |
| UROD        | -0,251231937 | -0,121218526 | 0 | N.A. | 0 |
| HIRA        | -0,251284344 | 0,012564225  | 0 | N.A. | 0 |
| RP11-611E13 | -0,251409431 | 0,012555527  | 0 | N.A. | 0 |
| C14orf119   | -0,251497681 | -0,11851574  | 0 | N.A. | 0 |
| SFXN1       | -0,251510524 | -0,223126641 | 0 | N.A. | 0 |
| CIR1        | -0,251514124 | 0,211098736  | 0 | N.A. | 0 |
| TAF11       | -0,251789463 | -0,155727224 | 0 | N.A. | 0 |
| SSX2IP      | -0,251832758 | -0,286931068 | 0 | N.A. | 0 |
| UNC119B     | -0,252144001 | -0,137180128 | 0 | N.A. | 0 |
| BCAP31      | -0,252311824 | 0,135836291  | 0 | N.A. | 0 |
| BSG         | -0,252657979 | 0,400199387  | 0 | N.A. | 0 |
| C12orf60    | -0,252770088 | -0,142599063 | 0 | N.A. | 0 |
| SART3       | -0,25282873  | 0,080039858  | 0 | N.A. | 0 |
| DUS2        | -0,252829267 | -0,13721538  | 0 | N.A. | 0 |
| NAA16       | -0,252869953 | -0,139440163 | 0 | N.A. | 0 |
| FTSJ3       | -0,253096787 | -0,120426961 | 0 | N.A. | 0 |
| CTC-459F4.3 | -0,253166652 | 0,000472663  | 0 | N.A. | 0 |
| ZSCAN2      | -0,25317806  | -0,025104141 | 0 | N.A. | 0 |
| GKAP1       | -0,253203667 | 0,064933892  | 0 | N.A. | 0 |
| TOPBP1      | -0,25331061  | -0,222809801 | 0 | N.A. | 0 |
| YIF1A       | -0,25334123  | 0,174948034  | 0 | N.A. | 0 |
| FAM185A     | -0,253424909 | -0,171364476 | 0 | N.A. | 0 |
| CTA-445C9.1 | -0,253535698 | -0,342305675 | 0 | N.A. | 0 |
| POU2F1      | -0,253553969 | 0,180854749  | 0 | N.A. | 0 |
| RP11-279F6. | -0,253693021 | 0,056291145  | 0 | N.A. | 0 |
| PAQR4       | -0,253795062 | 0,456718689  | 0 | N.A. | 0 |

|             |              |              |   |      |   |
|-------------|--------------|--------------|---|------|---|
| MAPKAPK5-A  | -0,253855769 | 0,053400701  | 0 | N.A. | 0 |
| ALDH3A2     | -0,254132483 | 0,026778205  | 0 | N.A. | 0 |
| MTAP        | -0,254169913 | -0,07548164  | 0 | N.A. | 0 |
| CA8         | -0,254177296 | -0,055844661 | 0 | N.A. | 0 |
| C14orf169   | -0,254519194 | 0,100570247  | 0 | N.A. | 0 |
| TASP1       | -0,254699585 | -0,072002545 | 0 | N.A. | 0 |
| YTHDF3-AS1  | -0,254721281 | -0,229655506 | 0 | N.A. | 0 |
| ZNF92       | -0,254762367 | -0,131862125 | 0 | N.A. | 0 |
| TRIM2       | -0,25486887  | 0,042641438  | 0 | N.A. | 0 |
| AC005076.5  | -0,255107677 | 0,099815365  | 0 | N.A. | 0 |
| FTCDNL1     | -0,255592668 | -0,191121839 | 0 | N.A. | 0 |
| ATP2A1-AS1  | -0,255648088 | -0,321903597 | 0 | N.A. | 0 |
| RQCD1       | -0,25574372  | -0,284811656 | 0 | N.A. | 0 |
| SLC39A7     | -0,255900747 | 0,09353133   | 0 | N.A. | 0 |
| BBS7        | -0,255985343 | -0,077655386 | 0 | N.A. | 0 |
| CTD-3184A7. | -0,256165555 | -0,143233975 | 0 | N.A. | 0 |
| PMS2        | -0,256433489 | -0,195817184 | 0 | N.A. | 0 |
| RLN2        | -0,256440523 | -0,186169219 | 0 | N.A. | 0 |
| TP53RK      | -0,256501478 | -0,217335438 | 0 | N.A. | 0 |
| AC011043.1  | -0,256550324 | -0,06829865  | 0 | N.A. | 0 |
| SLC25A33    | -0,256553243 | -0,299069991 | 0 | N.A. | 0 |
| TONSL       | -0,25660545  | -0,101264968 | 0 | N.A. | 0 |
| GSPT2       | -0,256657487 | -0,118409126 | 0 | N.A. | 0 |
| CRTAP       | -0,256689987 | -0,377880629 | 0 | N.A. | 0 |
| NEDD1       | -0,256914953 | -0,336874899 | 0 | N.A. | 0 |
| LRRC34      | -0,256968395 | -0,173814514 | 0 | N.A. | 0 |
| ARPC3       | -0,256997779 | -0,293316689 | 0 | N.A. | 0 |
| BNIP1       | -0,257014185 | -0,121704062 | 0 | N.A. | 0 |
| UBE2G2      | -0,257074488 | -0,184698763 | 0 | N.A. | 0 |
| PPARGC1B    | -0,257113109 | -0,187389858 | 0 | N.A. | 0 |
| PANK2       | -0,257374308 | -0,168091704 | 0 | N.A. | 0 |
| PI4K2B      | -0,257393342 | -0,146664179 | 0 | N.A. | 0 |
| GLB1L2      | -0,2574013   | -0,042522454 | 0 | N.A. | 0 |

|          |              |              |   |      |   |
|----------|--------------|--------------|---|------|---|
| DOK1     | -0,257437404 | -0,039043008 | 0 | N.A. | 0 |
| TAGLN2   | -0,25748256  | -0,12966322  | 0 | N.A. | 0 |
| XPO1     | -0,257529788 | 0,052153666  | 0 | N.A. | 0 |
| RCHY1    | -0,257718478 | 0,038709247  | 0 | N.A. | 0 |
| AGBL5    | -0,257809756 | -0,387809341 | 0 | N.A. | 0 |
| NEIL3    | -0,257814414 | -0,412965719 | 0 | N.A. | 0 |
| CISD2    | -0,257835848 | -0,10748043  | 0 | N.A. | 0 |
| PHYH     | -0,257842739 | 0,034807203  | 0 | N.A. | 0 |
| DHRS7B   | -0,257961398 | 0,018050422  | 0 | N.A. | 0 |
| SLTM     | -0,258129049 | 0,022989264  | 0 | N.A. | 0 |
| TLL12    | -0,258204413 | 0,21104503   | 0 | N.A. | 0 |
| KNTC1    | -0,258252797 | 0,022651544  | 0 | N.A. | 0 |
| PPP2CA   | -0,258529368 | -0,058792089 | 0 | N.A. | 0 |
| RXRB     | -0,258544313 | -0,165076905 | 0 | N.A. | 0 |
| RMI1     | -0,258706413 | -0,158156526 | 0 | N.A. | 0 |
| CASP8AP2 | -0,258713772 | -0,179744633 | 0 | N.A. | 0 |
| MTFP1    | -0,258773055 | -0,09396486  | 0 | N.A. | 0 |
| STRBP    | -0,258954735 | -0,264046872 | 0 | N.A. | 0 |
| ANAPC1   | -0,259010316 | -0,164630512 | 0 | N.A. | 0 |
| NFIA     | -0,259049187 | -0,17781819  | 0 | N.A. | 0 |
| THEM4    | -0,259091771 | -0,31809007  | 0 | N.A. | 0 |
| DCTN2    | -0,25915196  | 0,074290893  | 0 | N.A. | 0 |
| DEF8     | -0,259177664 | -0,036698541 | 0 | N.A. | 0 |
| ERLIN1   | -0,259187654 | 0,054578356  | 0 | N.A. | 0 |
| RINT1    | -0,259232809 | 0,062277696  | 0 | N.A. | 0 |
| TST      | -0,2594804   | 0,059565863  | 0 | N.A. | 0 |
| HOXB-AS3 | -0,25951099  | 0,236855075  | 0 | N.A. | 0 |
| RMDN2    | -0,259596377 | -0,15056322  | 0 | N.A. | 0 |
| POLR1B   | -0,259711752 | -0,13421615  | 0 | N.A. | 0 |
| DNASE2   | -0,259724939 | 0,172715263  | 0 | N.A. | 0 |
| FDFT1    | -0,259766722 | 0,049282594  | 0 | N.A. | 0 |
| IGFBP4   | -0,25982091  | 0,134439982  | 0 | N.A. | 0 |
| TUBGCP4  | -0,259884345 | -0,032994504 | 0 | N.A. | 0 |

|             |              |              |   |      |   |
|-------------|--------------|--------------|---|------|---|
| CCDC112     | -0,260278908 | 0,147518537  | 0 | N.A. | 0 |
| FCF1        | -0,260456001 | -0,330531791 | 0 | N.A. | 0 |
| CCDC18      | -0,260597322 | -0,239844562 | 0 | N.A. | 0 |
| AK3         | -0,26074102  | -0,092853612 | 0 | N.A. | 0 |
| GSTM3       | -0,261024098 | -0,357214358 | 0 | N.A. | 0 |
| RAB15       | -0,261211246 | -0,321789084 | 0 | N.A. | 0 |
| EAPP        | -0,261262631 | -0,098608328 | 0 | N.A. | 0 |
| PLAA        | -0,261293482 | -0,375005295 | 0 | N.A. | 0 |
| IARS        | -0,2613094   | -0,045955364 | 0 | N.A. | 0 |
| NUP43       | -0,261490358 | -0,197032443 | 0 | N.A. | 0 |
| STEAP3      | -0,261566184 | 0,157853533  | 0 | N.A. | 0 |
| ALDH1A1     | -0,261614676 | -0,141998245 | 0 | N.A. | 0 |
| UMODL1      | -0,261723261 | -0,227479349 | 0 | N.A. | 0 |
| SLC18B1     | -0,261792943 | 0,096239954  | 0 | N.A. | 0 |
| RP11-172H24 | -0,261949989 | -0,30180611  | 0 | N.A. | 0 |
| NGDN        | -0,262039723 | -0,055882366 | 0 | N.A. | 0 |
| UBL4A       | -0,26207433  | 0,083053331  | 0 | N.A. | 0 |
| ZNF273      | -0,262166149 | -0,38917745  | 0 | N.A. | 0 |
| CHTOP       | -0,262259712 | -0,063255205 | 0 | N.A. | 0 |
| ELOVL6      | -0,262318458 | -0,046816964 | 0 | N.A. | 0 |
| CMTM8       | -0,262589386 | 0,083960276  | 0 | N.A. | 0 |
| COX16       | -0,26263428  | -0,265318518 | 0 | N.A. | 0 |
| EIF4E2      | -0,262643077 | 0,029513769  | 0 | N.A. | 0 |
| CCDC43      | -0,262714195 | -0,158491531 | 0 | N.A. | 0 |
| PVT1        | -0,262892948 | 0,041044783  | 0 | N.A. | 0 |
| MTPAP       | -0,262915454 | 0,127158774  | 0 | N.A. | 0 |
| CSPP1       | -0,263120996 | -0,096026888 | 0 | N.A. | 0 |
| PRAC2       | -0,263160146 | -0,264459857 | 0 | N.A. | 0 |
| C16orf87    | -0,263210842 | -0,212338722 | 0 | N.A. | 0 |
| MID1IP1     | -0,263223981 | -0,124914279 | 1 | none | 0 |
| PIGK        | -0,263268109 | 0,059684041  | 0 | N.A. | 0 |
| PTGFRN      | -0,263304216 | -0,0539295   | 0 | N.A. | 0 |
| SNX1        | -0,263310288 | -0,107859047 | 0 | N.A. | 0 |

|             |              |              |   |      |   |
|-------------|--------------|--------------|---|------|---|
| THAP10      | -0,263388159 | -0,235655393 | 0 | N.A. | 0 |
| ABHD10      | -0,263388948 | -0,341305451 | 0 | N.A. | 0 |
| TSEN54      | -0,263754793 | 0,176334147  | 0 | N.A. | 0 |
| MOB4        | -0,263774725 | -0,020001208 | 0 | N.A. | 0 |
| CNTLN       | -0,263775477 | -0,22938519  | 0 | N.A. | 0 |
| FAM60A      | -0,263797818 | 0,109369619  | 0 | N.A. | 0 |
| UCP2        | -0,263864441 | -0,55611679  | 0 | N.A. | 0 |
| PTGR1       | -0,26396483  | -0,039683748 | 0 | N.A. | 0 |
| OGG1        | -0,264024037 | 0,107646107  | 0 | N.A. | 0 |
| HDGF        | -0,264079884 | 0,226285576  | 0 | N.A. | 0 |
| ZDHHC16     | -0,264177236 | -0,153830162 | 0 | N.A. | 0 |
| CDC25B      | -0,264359051 | -0,021864267 | 0 | N.A. | 0 |
| MON1A       | -0,264380612 | -0,01512962  | 0 | N.A. | 0 |
| CLUAP1      | -0,264450097 | -0,208943868 | 0 | N.A. | 0 |
| EIF4G1      | -0,264668552 | 0,236105872  | 0 | N.A. | 0 |
| ENOX2       | -0,264729559 | -0,379384826 | 0 | N.A. | 0 |
| DEGS2       | -0,26477538  | 0,275234203  | 0 | N.A. | 0 |
| ELP5        | -0,264891538 | -0,452701072 | 0 | N.A. | 0 |
| ID2         | -0,264910221 | -0,21297408  | 0 | N.A. | 0 |
| ATF7IP2     | -0,26495243  | -0,157057718 | 0 | N.A. | 0 |
| PITX2       | -0,265008257 | -0,074339476 | 0 | N.A. | 0 |
| TMEM160     | -0,265035905 | -0,30457893  | 0 | N.A. | 0 |
| TADA2A      | -0,265176978 | -0,020194256 | 0 | N.A. | 0 |
| SON         | -0,265190697 | 0,516339633  | 0 | N.A. | 0 |
| GS1-124K5.4 | -0,265227703 | -0,179333117 | 0 | N.A. | 0 |
| RNH1        | -0,265272352 | 0,164601437  | 0 | N.A. | 0 |
| FADS1       | -0,265281318 | 0,03073853   | 0 | N.A. | 0 |
| DUS1L       | -0,265293618 | -0,008765695 | 0 | N.A. | 0 |
| COX20       | -0,265622952 | -0,346313356 | 0 | N.A. | 0 |
| KPNA3       | -0,265710032 | -0,153262081 | 0 | N.A. | 0 |
| SNHG7       | -0,265711973 | -0,069693831 | 0 | N.A. | 0 |
| IPO9-AS1    | -0,265775295 | -0,083252888 | 0 | N.A. | 0 |
| PAIP2B      | -0,265940965 | -0,189797064 | 0 | N.A. | 0 |

|             |              |              |   |      |   |
|-------------|--------------|--------------|---|------|---|
| ING5        | -0,265992897 | -0,082643185 | 0 | N.A. | 0 |
| CPNE3       | -0,266069896 | -0,186611648 | 0 | N.A. | 0 |
| RP11-108L7. | -0,266134328 | -0,25311047  | 0 | N.A. | 0 |
| DPP10-AS1   | -0,266254679 | -0,259971526 | 0 | N.A. | 0 |
| PSMA2       | -0,266286259 | -0,102990134 | 0 | N.A. | 0 |
| KPTN        | -0,266293341 | -0,187257704 | 0 | N.A. | 0 |
| PRDX5       | -0,266365598 | -0,215274104 | 0 | N.A. | 0 |
| EFCAB2      | -0,266495269 | -0,397309825 | 0 | N.A. | 0 |
| UBAC2       | -0,266552093 | 0,180665578  | 0 | N.A. | 0 |
| IFT74       | -0,266626572 | -0,520959259 | 0 | N.A. | 0 |
| IRF8        | -0,266636493 | -0,162365565 | 0 | N.A. | 0 |
| TMEM69      | -0,266743459 | -0,259231561 | 0 | N.A. | 0 |
| FAM86B1     | -0,266848407 | 0,18783233   | 0 | N.A. | 0 |
| CBR3        | -0,266855377 | -0,11588124  | 0 | N.A. | 0 |
| CENPQ       | -0,267016724 | -0,21116527  | 0 | N.A. | 0 |
| MSRB1       | -0,26706627  | 0,024699365  | 0 | N.A. | 0 |
| SKIV2L2     | -0,267146535 | -0,116669066 | 0 | N.A. | 0 |
| ZNF302      | -0,26721471  | 0,045661288  | 0 | N.A. | 0 |
| NSRP1       | -0,26728939  | 0,06981736   | 0 | N.A. | 0 |
| GABPB1      | -0,267325507 | -0,176996412 | 0 | N.A. | 0 |
| PAH         | -0,267443943 | -0,162073398 | 0 | N.A. | 0 |
| UNC50       | -0,267560692 | -0,120247204 | 0 | N.A. | 0 |
| CBWD1       | -0,267788427 | -0,021081784 | 0 | N.A. | 0 |
| INTS7       | -0,26781059  | -0,237823778 | 0 | N.A. | 0 |
| SRSF6       | -0,267819195 | -0,088774464 | 0 | N.A. | 0 |
| GTF3C5      | -0,267860319 | -0,134607569 | 0 | N.A. | 0 |
| AC123023.1  | -0,267983895 | -0,263317966 | 0 | N.A. | 0 |
| ANKRD26     | -0,268041381 | -0,052162538 | 0 | N.A. | 0 |
| FANCL       | -0,268069306 | -0,134414578 | 0 | N.A. | 0 |
| INTS12      | -0,268277944 | -0,028637039 | 0 | N.A. | 0 |
| PEPD        | -0,268394455 | 0,030464676  | 0 | N.A. | 0 |
| PLP2        | -0,268412913 | 0,023020836  | 0 | N.A. | 0 |
| FAR2        | -0,268453319 | -0,211859478 | 0 | N.A. | 0 |

|            |              |              |   |      |   |
|------------|--------------|--------------|---|------|---|
| AC091729.9 | -0,268793773 | -0,333218744 | 0 | N.A. | 0 |
| TPP2       | -0,269086399 | -0,061603206 | 0 | N.A. | 0 |
| IGFBP2     | -0,269166179 | 0,081722008  | 0 | N.A. | 0 |
| DOCK11     | -0,269366445 | -0,138215426 | 0 | N.A. | 0 |
| BRIP1      | -0,269489096 | -0,36135503  | 0 | N.A. | 0 |
| QPRT       | -0,269681697 | -0,330250087 | 0 | N.A. | 0 |
| CAMTA1     | -0,269776799 | -0,457763729 | 0 | N.A. | 0 |
| CCDC53     | -0,269945158 | -0,239267246 | 0 | N.A. | 0 |
| CNTRL      | -0,270201012 | -0,198844942 | 0 | N.A. | 0 |
| CKMT1A     | -0,270232615 | -0,035266322 | 0 | N.A. | 0 |
| TADA3      | -0,270374671 | -0,388481415 | 0 | N.A. | 0 |
| FAIM2      | -0,270607203 | -0,251268578 | 0 | N.A. | 0 |
| HDHD2      | -0,270637827 | -0,246296634 | 0 | N.A. | 0 |
| STT3A      | -0,270674715 | -0,187467075 | 0 | N.A. | 0 |
| CNIH1      | -0,270721675 | -0,37437684  | 0 | N.A. | 0 |
| CKMT1B     | -0,270778752 | 0,084688132  | 0 | N.A. | 0 |
| SMTN       | -0,27082721  | -0,195350094 | 0 | N.A. | 0 |
| TBC1D4     | -0,270908009 | -0,071855157 | 0 | N.A. | 0 |
| MTL5       | -0,270925438 | -0,321585442 | 0 | N.A. | 0 |
| TIGD1      | -0,271494424 | -0,0160793   | 0 | N.A. | 0 |
| MNX1-AS1   | -0,271532117 | -0,315966509 | 0 | N.A. | 0 |
| SCML4      | -0,271535    | -0,377998206 | 0 | N.A. | 0 |
| CCBL2      | -0,271667046 | -0,418664247 | 0 | N.A. | 0 |
| DCAF11     | -0,271690164 | 0,010977809  | 0 | N.A. | 0 |
| TMEM199    | -0,271796707 | -0,086431087 | 0 | N.A. | 0 |
| C21orf58   | -0,271821522 | -0,106087403 | 0 | N.A. | 0 |
| GYLTL1B    | -0,272056764 | -0,172332453 | 0 | N.A. | 0 |
| KEAP1      | -0,272198711 | 0,029638772  | 0 | N.A. | 0 |
| UCKL1      | -0,272207921 | 0,26836747   | 0 | N.A. | 0 |
| COIL       | -0,272479322 | -0,060253047 | 0 | N.A. | 0 |
| GEMIN8     | -0,272509978 | -0,034927568 | 0 | N.A. | 0 |
| GSTA4      | -0,272532134 | -0,254336068 | 0 | N.A. | 0 |
| RNF20      | -0,272572454 | -0,305379696 | 0 | N.A. | 0 |



|          |              |              |   |      |   |
|----------|--------------|--------------|---|------|---|
| BRD8     | -0,272618996 | -0,145162428 | 0 | N.A. | 0 |
| PPAP2C   | -0,272631426 | 0,485032051  | 0 | N.A. | 0 |
| CCNF     | -0,272700547 | -0,251678474 | 0 | N.A. | 0 |
| TUBGCP3  | -0,272772778 | -0,232834328 | 0 | N.A. | 0 |
| UBR7     | -0,272877285 | -0,168704104 | 0 | N.A. | 0 |
| ABT1     | -0,273107054 | -0,432452536 | 0 | N.A. | 0 |
| ANAPC10  | -0,273144987 | -0,210614999 | 0 | N.A. | 0 |
| ZNF296   | -0,273145553 | -0,370521983 | 0 | N.A. | 0 |
| TRPM2    | -0,273161653 | -0,186752513 | 0 | N.A. | 0 |
| AGT      | -0,273191594 | -0,050430096 | 0 | N.A. | 0 |
| PTCD2    | -0,273203053 | -0,195646548 | 0 | N.A. | 0 |
| PPP1R14B | -0,27322485  | 0,092500644  | 0 | N.A. | 0 |
| ACTR6    | -0,273424771 | -0,302395365 | 0 | N.A. | 0 |
| MTERF2   | -0,273427944 | -0,481900624 | 0 | N.A. | 0 |
| AGTRAP   | -0,273573355 | 0,196858418  | 0 | N.A. | 0 |
| TRAPPC3  | -0,273736817 | -0,094995076 | 0 | N.A. | 0 |
| ZC3HC1   | -0,273758729 | -0,394458243 | 0 | N.A. | 0 |
| KBTBD6   | -0,273923354 | -0,205197451 | 0 | N.A. | 0 |
| NUDT3    | -0,273978897 | -0,114220526 | 0 | N.A. | 0 |
| PGM2     | -0,274181228 | -0,278127046 | 0 | N.A. | 0 |
| PNPLA4   | -0,274324131 | -0,188550047 | 0 | N.A. | 0 |
| STK25    | -0,274449463 | 0,407774995  | 0 | N.A. | 0 |
| PRPF3    | -0,274456949 | 0,050220068  | 0 | N.A. | 0 |
| RASL11A  | -0,274529507 | -0,304066215 | 0 | N.A. | 0 |
| MED27    | -0,274565639 | -0,285074215 | 0 | N.A. | 0 |
| BOLA1    | -0,274815759 | -0,33279745  | 0 | N.A. | 0 |
| TGFBI    | -0,274847439 | -0,065243806 | 0 | N.A. | 0 |
| GJB1     | -0,274918071 | -0,081273015 | 0 | N.A. | 0 |
| HSPB6    | -0,275008101 | -0,169330139 | 0 | N.A. | 0 |
| PFAS     | -0,275096881 | -0,252802702 | 0 | N.A. | 0 |
| PIDD1    | -0,275210386 | 0,066454897  | 0 | N.A. | 0 |
| POLR3B   | -0,275253788 | -0,227447828 | 0 | N.A. | 0 |
| PTBP1    | -0,27531332  | -0,141240361 | 0 | N.A. | 0 |

|          |              |              |   |      |   |
|----------|--------------|--------------|---|------|---|
| AAGAB    | -0,275364523 | 0,112410965  | 0 | N.A. | 0 |
| HNRNPLL  | -0,275461034 | -0,142701894 | 0 | N.A. | 0 |
| NME6     | -0,275546696 | -0,231045039 | 0 | N.A. | 0 |
| EPHX2    | -0,275562378 | -0,042415245 | 0 | N.A. | 0 |
| DRAP1    | -0,275703327 | -0,240816441 | 0 | N.A. | 0 |
| SRP19    | -0,275711313 | 0,192348476  | 0 | N.A. | 0 |
| PRKAR1B  | -0,275723263 | -0,19098657  | 0 | N.A. | 0 |
| ZCCHC17  | -0,275746916 | -0,097023177 | 0 | N.A. | 0 |
| C12orf73 | -0,275754607 | -0,154772033 | 0 | N.A. | 0 |
| KLHDC4   | -0,275755577 | -0,161793141 | 0 | N.A. | 0 |
| ARL6IP6  | -0,27583644  | 0,112151941  | 0 | N.A. | 0 |
| WRB      | -0,275885329 | -0,1727494   | 0 | N.A. | 0 |
| C19orf40 | -0,275886979 | -0,177842395 | 0 | N.A. | 0 |
| TP53     | -0,27600886  | -0,303219409 | 0 | N.A. | 0 |
| TMEM147  | -0,276046908 | -0,16643131  | 0 | N.A. | 0 |
| EIF3B    | -0,276110679 | 0,236402173  | 0 | N.A. | 0 |
| TRIM59   | -0,276480071 | -0,415899697 | 0 | N.A. | 0 |
| HSD17B7  | -0,276738962 | 0,180700895  | 0 | N.A. | 0 |
| IER3IP1  | -0,276809952 | -0,107229597 | 0 | N.A. | 0 |
| ERCC8    | -0,276841227 | -0,557881001 | 0 | N.A. | 0 |
| NUP188   | -0,276964725 | 0,111875045  | 0 | N.A. | 0 |
| FAP      | -0,277087413 | -0,130659582 | 0 | N.A. | 0 |
| C11orf84 | -0,277473156 | -0,064647564 | 0 | N.A. | 0 |
| ARL17A   | -0,277512133 | 0,044910221  | 0 | N.A. | 0 |
| COQ6     | -0,277789215 | -0,322384352 | 0 | N.A. | 0 |
| GLRX2    | -0,277889456 | 0,191840925  | 0 | N.A. | 0 |
| WNK2     | -0,27790676  | -0,266810557 | 0 | N.A. | 0 |
| GTPBP3   | -0,278010425 | -0,043306031 | 0 | N.A. | 0 |
| ELP4     | -0,278113014 | -0,131268705 | 0 | N.A. | 0 |
| ZFAND1   | -0,278277194 | -0,216376708 | 0 | N.A. | 0 |
| THOC5    | -0,278429288 | -0,462863272 | 0 | N.A. | 0 |
| IMPA2    | -0,278472331 | -0,044109229 | 0 | N.A. | 0 |
| SBSPON   | -0,27857778  | -0,087432911 | 0 | N.A. | 0 |

|         |              |              |   |      |   |
|---------|--------------|--------------|---|------|---|
| OGFOD3  | -0,278605558 | 0,013651838  | 0 | N.A. | 0 |
| KLHL12  | -0,278608884 | 0,001585882  | 0 | N.A. | 0 |
| SMYD3   | -0,278748188 | -0,299546703 | 0 | N.A. | 0 |
| TTC8    | -0,278859836 | 0,038552197  | 0 | N.A. | 0 |
| GNPAT   | -0,278929909 | -3,01248E-05 | 0 | N.A. | 0 |
| CFAP97  | -0,278932647 | -0,22488743  | 0 | N.A. | 0 |
| ADAT2   | -0,279177959 | -0,128036746 | 0 | N.A. | 0 |
| FGGY    | -0,279223845 | -0,244551759 | 0 | N.A. | 0 |
| ATF6B   | -0,279371161 | 0,010442034  | 0 | N.A. | 0 |
| MPP1    | -0,279456469 | -0,07034938  | 0 | N.A. | 0 |
| C14orf1 | -0,279467735 | 0,138103409  | 0 | N.A. | 0 |
| ARMC2   | -0,279610658 | -0,180062555 | 0 | N.A. | 0 |
| TYW1    | -0,279655992 | 0,2302509    | 0 | N.A. | 0 |
| SUMF2   | -0,279698458 | -0,148520307 | 0 | N.A. | 0 |
| METAP1D | -0,27987654  | 0,002240667  | 0 | N.A. | 0 |
| CHMP4A  | -0,279949223 | 0,169564725  | 0 | N.A. | 0 |
| OAZ2    | -0,279954181 | -0,104808711 | 0 | N.A. | 0 |
| DERA    | -0,280042372 | -0,147861546 | 0 | N.A. | 0 |
| TAF5    | -0,280132303 | -0,135777321 | 0 | N.A. | 0 |
| MTO1    | -0,280219845 | -0,263543063 | 0 | N.A. | 0 |
| APEX2   | -0,280222442 | 0,024193345  | 0 | N.A. | 0 |
| GPX1    | -0,280373562 | -0,24469828  | 0 | N.A. | 0 |
| HOXA11  | -0,280457823 | -0,091636142 | 0 | N.A. | 0 |
| SLC19A1 | -0,280480892 | 0,041388027  | 0 | N.A. | 0 |
| COMMD5  | -0,280594498 | -0,066215921 | 0 | N.A. | 0 |
| MT1G    | -0,280702303 | -0,254695544 | 0 | N.A. | 0 |
| DZIP3   | -0,280791945 | -0,189170499 | 0 | N.A. | 0 |
| CCNE2   | -0,280819077 | -0,125303097 | 0 | N.A. | 0 |
| MASTL   | -0,281004795 | 0,074426955  | 0 | N.A. | 0 |
| DMC1    | -0,281007416 | -0,20921984  | 0 | N.A. | 0 |
| HSPH1   | -0,281083215 | 0,140922463  | 0 | N.A. | 0 |
| RNF113A | -0,281259842 | -0,219133795 | 0 | N.A. | 0 |
| RRP7A   | -0,2813448   | -0,2417115   | 0 | N.A. | 0 |

|           |              |              |   |      |   |
|-----------|--------------|--------------|---|------|---|
| NCAPH2    | -0,281353172 | -0,170936466 | 0 | N.A. | 0 |
| DHPS      | -0,281758033 | 0,234757978  | 0 | N.A. | 0 |
| NOSIP     | -0,281777871 | -0,202824447 | 0 | N.A. | 0 |
| PRRT3-AS1 | -0,281781369 | -0,308440162 | 0 | N.A. | 0 |
| LSM14A    | -0,281811288 | -0,36354345  | 0 | N.A. | 0 |
| COASY     | -0,281852805 | 0,170694155  | 0 | N.A. | 0 |
| NOM1      | -0,281890498 | -0,022190037 | 0 | N.A. | 0 |
| PRPF6     | -0,282193583 | 0,189253537  | 0 | N.A. | 0 |
| NUP155    | -0,282254538 | -0,159294521 | 0 | N.A. | 0 |
| ZBTB80S   | -0,282289043 | -0,182091346 | 0 | N.A. | 0 |
| NDRG3     | -0,282349588 | -0,126553718 | 0 | N.A. | 0 |
| TPD52L1   | -0,282504982 | -0,168319132 | 0 | N.A. | 0 |
| KIF21A    | -0,282511952 | 0,428828466  | 0 | N.A. | 0 |
| SMAGP     | -0,2826688   | 0,285733732  | 0 | N.A. | 0 |
| POLE4     | -0,282932226 | -0,325406927 | 0 | N.A. | 0 |
| PCGF6     | -0,283096056 | -0,289649816 | 0 | N.A. | 0 |
| CNOT7     | -0,283175816 | -0,247089906 | 0 | N.A. | 0 |
| ACADSB    | -0,283402906 | 0,062061808  | 0 | N.A. | 0 |
| QTRTD1    | -0,283508259 | -0,158241692 | 0 | N.A. | 0 |
| KDEL1     | -0,283520217 | 0,09572767   | 0 | N.A. | 0 |
| TICRR     | -0,283556448 | -0,184284341 | 0 | N.A. | 0 |
| TFDP2     | -0,283751821 | -0,256568458 | 0 | N.A. | 0 |
| HCFC1     | -0,283934704 | 0,035623904  | 0 | N.A. | 0 |
| PPOX      | -0,284090659 | -0,184196716 | 0 | N.A. | 0 |
| PREB      | -0,284924907 | -0,015973577 | 0 | N.A. | 0 |
| NSMCE2    | -0,285214719 | -0,182683402 | 0 | N.A. | 0 |
| ANKRD46   | -0,285251378 | -0,102707929 | 0 | N.A. | 0 |
| ASMTL     | -0,285291829 | 0,181084038  | 0 | N.A. | 0 |
| WDR36     | -0,285325933 | 0,069809142  | 0 | N.A. | 0 |
| CSK       | -0,28554845  | -0,285589508 | 0 | N.A. | 0 |
| LZTFL1    | -0,285630535 | -0,24283842  | 0 | N.A. | 0 |
| LSM10     | -0,285657561 | -0,215596479 | 0 | N.A. | 0 |
| C8orf33   | -0,285685387 | -0,081627037 | 0 | N.A. | 0 |

|             |              |              |   |      |   |
|-------------|--------------|--------------|---|------|---|
| MED24       | -0,285788032 | -0,049089948 | 0 | N.A. | 0 |
| ZNF572      | -0,285855448 | -0,01834351  | 0 | N.A. | 0 |
| PIGW        | -0,285897768 | -0,392820619 | 0 | N.A. | 0 |
| RBMXL1      | -0,285909149 | -0,117507712 | 0 | N.A. | 0 |
| VWA9        | -0,286198304 | -0,145256884 | 0 | N.A. | 0 |
| CCDC94      | -0,286301932 | -0,067728984 | 0 | N.A. | 0 |
| SPATA33     | -0,286375006 | -0,057022847 | 0 | N.A. | 0 |
| FAM81A      | -0,286437753 | -0,215780337 | 0 | N.A. | 0 |
| TMEM209     | -0,286465152 | -0,038696638 | 0 | N.A. | 0 |
| GALM        | -0,286804437 | -0,027349931 | 0 | N.A. | 0 |
| HIST1H3G    | -0,286932334 | -0,217148938 | 0 | N.A. | 0 |
| ACSL6       | -0,286948274 | -0,26861901  | 0 | N.A. | 0 |
| DNAAF2      | -0,287033957 | -0,213826278 | 0 | N.A. | 0 |
| CCDC47      | -0,287259517 | 0,089061526  | 0 | N.A. | 0 |
| ARPC4       | -0,287413184 | -0,069879525 | 0 | N.A. | 0 |
| POC5        | -0,287433223 | 0,092416627  | 0 | N.A. | 0 |
| UTP20       | -0,287598976 | -0,245620016 | 0 | N.A. | 0 |
| GNB1L       | -0,28767843  | -0,212796685 | 0 | N.A. | 0 |
| RP11-214N9. | -0,287691716 | 0,031535547  | 0 | N.A. | 0 |
| SWI5        | -0,287745789 | -0,096286638 | 0 | N.A. | 0 |
| RP13-582O9. | -0,287832265 | -0,145530548 | 0 | N.A. | 0 |
| STIL        | -0,288131916 | -0,261735747 | 0 | N.A. | 0 |
| DHRS4-AS1   | -0,288168056 | -0,404273363 | 0 | N.A. | 0 |
| BRE         | -0,288171189 | -0,049399793 | 0 | N.A. | 0 |
| UBAP2L      | -0,288729297 | -0,068857295 | 0 | N.A. | 0 |
| DNAJC11     | -0,288771851 | -0,02978871  | 0 | N.A. | 0 |
| ZNF232      | -0,288875152 | -0,291955537 | 0 | N.A. | 0 |
| PDK3        | -0,288877689 | -0,138606873 | 0 | N.A. | 0 |
| HSF2        | -0,288908265 | -0,324237148 | 0 | N.A. | 0 |
| TMX1        | -0,288963971 | -0,180296051 | 0 | N.A. | 0 |
| RP11-132A1. | -0,28896821  | -0,287150002 | 0 | N.A. | 0 |
| HSBP1       | -0,288987988 | -0,351136759 | 0 | N.A. | 0 |
| CDK5        | -0,289010676 | -0,163686971 | 0 | N.A. | 0 |

|            |              |              |   |      |   |
|------------|--------------|--------------|---|------|---|
| UQCR11     | -0,289059287 | -0,285167284 | 0 | N.A. | 0 |
| NUBP1      | -0,289193155 | -0,015638405 | 0 | N.A. | 0 |
| EIF2AK4    | -0,28920345  | 0,200098084  | 0 | N.A. | 0 |
| ACACA      | -0,289265704 | 0,070915265  | 0 | N.A. | 0 |
| SGTA       | -0,289437038 | -0,252611882 | 0 | N.A. | 0 |
| THOC1      | -0,28946002  | -0,065135382 | 0 | N.A. | 0 |
| TRIM65     | -0,289609222 | 0,219680572  | 0 | N.A. | 0 |
| NUDT8      | -0,289853763 | -0,021900342 | 0 | N.A. | 0 |
| RP5-908M14 | -0,289975221 | -0,028582828 | 0 | N.A. | 0 |
| PEF1       | -0,290040505 | -0,08600896  | 0 | N.A. | 0 |
| ACAA2      | -0,290455766 | -0,091246348 | 0 | N.A. | 0 |
| PIGT       | -0,290461499 | 0,063928097  | 0 | N.A. | 0 |
| RP11-785H5 | -0,290498679 | 0,022970506  | 0 | N.A. | 0 |
| AGPS       | -0,290539183 | -0,263086323 | 0 | N.A. | 0 |
| FBXO9      | -0,290583544 | -0,218957706 | 0 | N.A. | 0 |
| RP11-386G1 | -0,290605295 | -0,223135863 | 0 | N.A. | 0 |
| GPALPP1    | -0,29080869  | -0,182943953 | 0 | N.A. | 0 |
| ME2        | -0,290858507 | -0,150395577 | 0 | N.A. | 0 |
| KDELC1     | -0,291165673 | -0,175505095 | 0 | N.A. | 0 |
| GLS2       | -0,291474247 | -0,292537143 | 0 | N.A. | 0 |
| TRAPPC4    | -0,291682459 | -0,16382925  | 0 | N.A. | 0 |
| C9orf40    | -0,291745033 | -0,089217991 | 0 | N.A. | 0 |
| TXNDC17    | -0,292142507 | -0,15196816  | 0 | N.A. | 0 |
| ACADM      | -0,292159784 | -0,333990117 | 0 | N.A. | 0 |
| USP10      | -0,292164075 | -0,120171261 | 0 | N.A. | 0 |
| RSBN1L     | -0,292408864 | -0,012796865 | 0 | N.A. | 0 |
| TBCE       | -0,29244944  | 0,21151809   | 0 | N.A. | 0 |
| ZDHHC4     | -0,292604509 | -0,222780075 | 0 | N.A. | 0 |
| COPS7A     | -0,292644492 | -0,070394814 | 0 | N.A. | 0 |
| TCEAL1     | -0,29291911  | -0,361997896 | 0 | N.A. | 0 |
| TRUB1      | -0,293094091 | -0,412186577 | 0 | N.A. | 0 |
| PHAX       | -0,293196547 | 0,013829896  | 0 | N.A. | 0 |
| NSUN2      | -0,293335048 | -0,102897855 | 0 | N.A. | 0 |

|             |                     |                    |          |             |          |
|-------------|---------------------|--------------------|----------|-------------|----------|
| CDC23       | -0,293400328        | -0,133106423       | 0        | N.A.        | 0        |
| GTPBP8      | -0,293690945        | -0,167074214       | 0        | N.A.        | 0        |
| HN1L        | -0,29374424         | 0,07499602         | 0        | N.A.        | 0        |
| RAD23B      | -0,294004112        | 0,047939762        | 0        | N.A.        | 0        |
| CDK5RAP2    | -0,294325389        | -0,077162629       | 0        | N.A.        | 0        |
| PRPF4B      | -0,294403769        | 0,03612494         | 0        | N.A.        | 0        |
| THUMPD2     | -0,294441502        | 0,081997036        | 0        | N.A.        | 0        |
| PLCB2       | -0,294739037        | -0,228399727       | 0        | N.A.        | 0        |
| AC009005.2  | -0,294768049        | -0,362827659       | 0        | N.A.        | 0        |
| FAM104A     | -0,295163897        | -0,036349777       | 0        | N.A.        | 0        |
| XYLB        | -0,295219418        | -0,211331449       | 0        | N.A.        | 0        |
| MANBAL      | -0,295439505        | 0,009552565        | 0        | N.A.        | 0        |
| ZW10        | -0,295525576        | -0,224822665       | 0        | N.A.        | 0        |
| KIAA1143    | -0,295589044        | -0,168022453       | 0        | N.A.        | 0        |
| TARBP2      | -0,296052245        | -0,430467614       | 0        | N.A.        | 0        |
| GSDMD       | -0,296070969        | 0,155039962        | 0        | N.A.        | 0        |
| TRAPPC6A    | -0,296122809        | -0,417512247       | 0        | N.A.        | 0        |
| SDHAF1      | -0,296279967        | -0,001242344       | 0        | N.A.        | 0        |
| MCCC1       | -0,296343027        | -0,297815996       | 0        | N.A.        | 0        |
| CSTF1       | -0,296511007        | -0,017007043       | 0        | N.A.        | 0        |
| MTA1        | -0,296936081        | 0,146377485        | 0        | N.A.        | 0        |
| NAF1        | -0,297067714        | -0,385042676       | 0        | N.A.        | 0        |
| SND1        | -0,29709998         | -0,003317337       | 0        | N.A.        | 0        |
| DNAJA1      | -0,297145712        | -0,202014433       | 0        | N.A.        | 0        |
| EIF2AK1     | -0,297236332        | -0,09672077        | 0        | N.A.        | 0        |
| TINAG       | -0,297463329        | -0,359905496       | 0        | N.A.        | 0        |
| HTATIP2     | -0,297502049        | 0,126945463        | 0        | N.A.        | 0        |
| CBR4        | -0,297668426        | -0,049703123       | 0        | N.A.        | 0        |
| SSU72       | -0,297726875        | -0,089215217       | 0        | N.A.        | 0        |
| PGAM1       | -0,297956637        | -0,183926169       | 0        | N.A.        | 0        |
| YWHAH       | -0,298028989        | -0,068337262       | 0        | N.A.        | 0        |
| <b>GAS6</b> | <b>-0,298221401</b> | <b>0,138258868</b> | <b>1</b> | <b>none</b> | <b>0</b> |
| ATG4C       | -0,298415017        | -0,233277907       | 0        | N.A.        | 0        |

|          |              |              |   |      |   |
|----------|--------------|--------------|---|------|---|
| UBE2D2   | -0,298456353 | -0,270917148 | 0 | N.A. | 0 |
| RAB4A    | -0,298508179 | -0,349668999 | 0 | N.A. | 0 |
| CDKN2C   | -0,29870276  | -0,358164334 | 0 | N.A. | 0 |
| MLH1     | -0,29896247  | -0,289359433 | 0 | N.A. | 0 |
| AP3M2    | -0,298967647 | 0,105554609  | 0 | N.A. | 0 |
| TMEM52   | -0,298983071 | -0,003908733 | 0 | N.A. | 0 |
| DYNC2LI1 | -0,299082423 | -0,15401563  | 0 | N.A. | 0 |
| NNT-AS1  | -0,299103711 | -0,17335325  | 0 | N.A. | 0 |
| LARS     | -0,299114067 | -0,328651501 | 0 | N.A. | 0 |
| HNRNPH2  | -0,299165854 | -0,126264382 | 0 | N.A. | 0 |
| ZNHIT6   | -0,29918888  | -0,158098809 | 0 | N.A. | 0 |
| MIF      | -0,299307491 | -0,336589981 | 0 | N.A. | 0 |
| OSGEPL1  | -0,29941393  | -0,064212388 | 0 | N.A. | 0 |
| NUP88    | -0,299447087 | -0,199931128 | 0 | N.A. | 0 |
| DAK      | -0,29973919  | 0,023947574  | 0 | N.A. | 0 |
| METTL23  | -0,299780876 | -0,298823183 | 0 | N.A. | 0 |
| CCNG1    | -0,299793085 | -0,590163168 | 0 | N.A. | 0 |
| COPS7B   | -0,300019604 | -0,174335923 | 0 | N.A. | 0 |
| HULC     | -0,300106118 |              | 0 | N.A. | 0 |
| BIVM     | -0,300153788 | -0,121746517 | 0 | N.A. | 0 |
| PTRH1    | -0,300205004 | 0,222839682  | 0 | N.A. | 0 |
| PUSL1    | -0,300331635 | 0,041384906  | 0 | N.A. | 0 |
| GPD1     | -0,300352735 | -0,137733041 | 0 | N.A. | 0 |
| HSD17B12 | -0,300666349 | 0,057762364  | 0 | N.A. | 0 |
| TTI1     | -0,300904733 | -0,23519989  | 0 | N.A. | 0 |
| INIP     | -0,301267651 | -0,220848192 | 0 | N.A. | 0 |
| POP1     | -0,30151846  | -0,100620872 | 0 | N.A. | 0 |
| C1orf86  | -0,3018158   | -0,376203809 | 0 | N.A. | 0 |
| C1orf53  | -0,302129619 | -0,256359442 | 0 | N.A. | 0 |
| AFG3L2   | -0,30220946  | 0,000601204  | 0 | N.A. | 0 |
| NUP133   | -0,302226074 | -0,101417248 | 0 | N.A. | 0 |
| TTC38    | -0,302293336 | 0,114942199  | 0 | N.A. | 0 |
| SURF2    | -0,302369054 | -0,35618328  | 0 | N.A. | 0 |



|             |              |              |   |      |   |
|-------------|--------------|--------------|---|------|---|
| C1orf109    | -0,302430825 | -0,374190096 | 0 | N.A. | 0 |
| GEMIN7      | -0,302501442 | 0,078869701  | 0 | N.A. | 0 |
| NDUFAF3     | -0,302546472 | -0,369199093 | 0 | N.A. | 0 |
| PCBD2       | -0,302562241 | -0,139751814 | 0 | N.A. | 0 |
| PRPF38A     | -0,302691768 | -0,26689335  | 0 | N.A. | 0 |
| VAPB        | -0,302728679 | -0,353973253 | 0 | N.A. | 0 |
| TMEM38B     | -0,302764642 | -0,085130965 | 0 | N.A. | 0 |
| DGAT2       | -0,302788011 | 0,031415481  | 0 | N.A. | 0 |
| ARL14EP     | -0,302804431 | -0,092809485 | 0 | N.A. | 0 |
| MANF        | -0,302893084 | 0,067864596  | 0 | N.A. | 0 |
| METTL7B     | -0,302901343 | 0,158692174  | 0 | N.A. | 0 |
| FANCF       | -0,302918208 | -0,109259079 | 0 | N.A. | 0 |
| MPV17L      | -0,303156418 | -0,075303976 | 0 | N.A. | 0 |
| HEATR1      | -0,303442805 | -0,088576623 | 0 | N.A. | 0 |
| RP11-474D1. | -0,303601908 | -0,220312438 | 0 | N.A. | 0 |
| TCTN1       | -0,303688248 | -0,306731389 | 0 | N.A. | 0 |
| GEN1        | -0,303749184 | -0,108149239 | 0 | N.A. | 0 |
| METTL17     | -0,303760638 | 0,107539597  | 0 | N.A. | 0 |
| RPUSD1      | -0,30380614  | -0,157811843 | 0 | N.A. | 0 |
| AGPAT5      | -0,303865053 | -0,11711006  | 0 | N.A. | 0 |
| RAB13       | -0,304041889 | -0,277227685 | 0 | N.A. | 0 |
| COQ7        | -0,304221661 | 0,063449238  | 0 | N.A. | 0 |
| PNP         | -0,304373722 | 0,116855691  | 0 | N.A. | 0 |
| RFC1        | -0,304539601 | -0,106440491 | 0 | N.A. | 0 |
| POLR3F      | -0,304740491 | -0,165263516 | 0 | N.A. | 0 |
| VPS72       | -0,304863157 | 0,004506557  | 0 | N.A. | 0 |
| EIF2B2      | -0,305057733 | -0,087750398 | 0 | N.A. | 0 |
| RAD50       | -0,305113266 | 0,027879258  | 0 | N.A. | 0 |
| FAHD2B      | -0,305243601 | -0,305040498 | 0 | N.A. | 0 |
| C19orf52    | -0,305270343 | 0,006283853  | 0 | N.A. | 0 |
| INO80E      | -0,305389847 | -0,140847158 | 0 | N.A. | 0 |
| HDGFRP2     | -0,305397793 | -0,025641038 | 0 | N.A. | 0 |
| LYRM2       | -0,305544895 | -0,142734488 | 0 | N.A. | 0 |

|            |              |              |   |      |   |
|------------|--------------|--------------|---|------|---|
| CBWD2      | -0,305714222 | -0,077839182 | 0 | N.A. | 0 |
| PTOV1      | -0,306073267 | 0,357797003  | 0 | N.A. | 0 |
| MPHOSPH8   | -0,306409618 | 0,286702225  | 0 | N.A. | 0 |
| C6orf211   | -0,306478972 | -0,125450965 | 0 | N.A. | 0 |
| CRNDE      | -0,306515031 | -0,188617163 | 0 | N.A. | 0 |
| AIFM3      | -0,306659693 | -0,218459744 | 0 | N.A. | 0 |
| UTP3       | -0,306764896 | 0,016190646  | 0 | N.A. | 0 |
| PROSC      | -0,30689463  | -0,111888123 | 0 | N.A. | 0 |
| CNOT10     | -0,30716217  | 0,085107019  | 0 | N.A. | 0 |
| CBY1       | -0,307522982 | -0,28036989  | 0 | N.A. | 0 |
| EME1       | -0,307537826 | -0,20394589  | 0 | N.A. | 0 |
| TRABD      | -0,308621229 | 0,235581063  | 0 | N.A. | 0 |
| TXNRD2     | -0,308848476 | -0,229186069 | 0 | N.A. | 0 |
| EEFSEC     | -0,309307506 | -0,148719254 | 0 | N.A. | 0 |
| RP5-908M14 | -0,309307825 | -0,210787403 | 0 | N.A. | 0 |
| EIF2A      | -0,309513944 | -0,434945235 | 0 | N.A. | 0 |
| FKBP5      | -0,309660679 | -0,519229729 | 0 | N.A. | 0 |
| NOP2       | -0,309910161 | -0,117943711 | 0 | N.A. | 0 |
| ZRANB2     | -0,309926326 | 0,082472026  | 0 | N.A. | 0 |
| SMKR1      | -0,309965435 | -0,344514066 | 0 | N.A. | 0 |
| MAPRE1     | -0,310408389 | -0,203255546 | 0 | N.A. | 0 |
| AKR7A3     | -0,310414747 | 0,172018119  | 0 | N.A. | 0 |
| PPIL3      | -0,310429116 | -0,213788995 | 0 | N.A. | 0 |
| PEX3       | -0,310449225 | -0,279696194 | 0 | N.A. | 0 |
| LY6E       | -0,31056515  | -0,144140877 | 0 | N.A. | 0 |
| RP11-244M2 | -0,310699349 | -0,369171949 | 0 | N.A. | 0 |
| SLC27A2    | -0,310817186 | -0,129536345 | 0 | N.A. | 0 |
| CS         | -0,310845174 | 0,087885876  | 0 | N.A. | 0 |
| TBL3       | -0,310921247 | -0,231807553 | 0 | N.A. | 0 |
| CTNNA1     | -0,311019312 | -0,173549868 | 0 | N.A. | 0 |
| SPA17      | -0,311205811 | -0,361807763 | 0 | N.A. | 0 |
| HCCS       | -0,311215571 | -0,283099528 | 0 | N.A. | 0 |
| CPVL       | -0,311387946 | -0,07817999  | 0 | N.A. | 0 |

|          |              |              |   |      |   |
|----------|--------------|--------------|---|------|---|
| PDZD11   | -0,311393043 | -0,189025101 | 0 | N.A. | 0 |
| PHF6     | -0,31155809  | -0,223065316 | 0 | N.A. | 0 |
| SF3A2    | -0,311735618 | 0,142318067  | 0 | N.A. | 0 |
| CHPT1    | -0,311859483 | 0,168711669  | 0 | N.A. | 0 |
| SMOC2    | -0,312127845 | -0,190956572 | 0 | N.A. | 0 |
| FGFR4    | -0,312245847 | 0,07127615   | 0 | N.A. | 0 |
| BLM      | -0,312297689 | -0,311260877 | 0 | N.A. | 0 |
| RNMTL1   | -0,312570349 | -0,058225998 | 0 | N.A. | 0 |
| L2HGDH   | -0,312825034 | -0,271577179 | 0 | N.A. | 0 |
| DNAH6    | -0,312876675 | -0,296580906 | 0 | N.A. | 0 |
| HAUS8    | -0,312973086 | -0,175937921 | 0 | N.A. | 0 |
| SLC25A17 | -0,313003655 | -0,113113508 | 0 | N.A. | 0 |
| CFL1     | -0,313130453 | -0,09426089  | 0 | N.A. | 0 |
| HMG20B   | -0,313294276 | -0,217693196 | 0 | N.A. | 0 |
| C19orf43 | -0,31361905  | -0,12982909  | 0 | N.A. | 0 |
| FDXR     | -0,313744753 | -0,207903963 | 0 | N.A. | 0 |
| NPRL2    | -0,314138596 | -0,098095208 | 0 | N.A. | 0 |
| KATNA1   | -0,314303136 | -0,154365144 | 0 | N.A. | 0 |
| CAAP1    | -0,314356148 | -0,259187655 | 0 | N.A. | 0 |
| NDUFAF1  | -0,314548209 | -0,171396521 | 0 | N.A. | 0 |
| RPN2     | -0,314715049 | 0,013144097  | 0 | N.A. | 0 |
| BCL11A   | -0,314761655 | -0,290300075 | 0 | N.A. | 0 |
| MYBBP1A  | -0,314792738 | -0,167518494 | 0 | N.A. | 0 |
| C22orf39 | -0,314834558 | -0,252039374 | 0 | N.A. | 0 |
| MITD1    | -0,31486711  | -0,029498691 | 0 | N.A. | 0 |
| VPS4A    | -0,314899352 | 0,090018219  | 0 | N.A. | 0 |
| NDUFAF7  | -0,314914632 | -0,04091618  | 0 | N.A. | 0 |
| FIGNL1   | -0,315006402 | -0,303012355 | 0 | N.A. | 0 |
| STK32C   | -0,315130183 | -0,289150843 | 0 | N.A. | 0 |
| PHPT1    | -0,315572589 | -0,262080854 | 0 | N.A. | 0 |
| EIF6     | -0,315622914 | -0,050906353 | 0 | N.A. | 0 |
| DNA2     | -0,315845076 | -0,044794185 | 0 | N.A. | 0 |
| KHSRP    | -0,315917512 | 0,049693038  | 0 | N.A. | 0 |

|          |              |              |   |      |   |
|----------|--------------|--------------|---|------|---|
| EBAG9    | -0,316123122 | 0,019310698  | 0 | N.A. | 0 |
| GLMN     | -0,316164102 | -0,15159539  | 0 | N.A. | 0 |
| EIF1AY   | -0,316183656 | -0,274764159 | 0 | N.A. | 0 |
| MAPKAPK5 | -0,316681213 | -0,185226189 | 0 | N.A. | 0 |
| PPP2R5D  | -0,316699151 | -0,264144551 | 0 | N.A. | 0 |
| STARD10  | -0,316702164 | -0,165268866 | 0 | N.A. | 0 |
| LYPLAL1  | -0,316792562 | -0,241144907 | 0 | N.A. | 0 |
| TIMM21   | -0,316885742 | -0,249521726 | 0 | N.A. | 0 |
| CLPB     | -0,317054362 | -0,28224407  | 0 | N.A. | 0 |
| TBC1D31  | -0,317101603 | -0,271453324 | 0 | N.A. | 0 |
| ERCC6L   | -0,317302977 | -0,14552061  | 0 | N.A. | 0 |
| GLE1     | -0,317403609 | -0,324930851 | 0 | N.A. | 0 |
| PLEKHB1  | -0,317706317 | -0,414237899 | 0 | N.A. | 0 |
| NOL12    | -0,317720852 | -0,141406041 | 0 | N.A. | 0 |
| TDP1     | -0,317831725 | -0,161856841 | 0 | N.A. | 0 |
| C7orf73  | -0,317951486 | -0,38608991  | 0 | N.A. | 0 |
| C19orf60 | -0,318003008 | -0,167500223 | 0 | N.A. | 0 |
| IAH1     | -0,31802104  | -0,169768225 | 0 | N.A. | 0 |
| TRMT1    | -0,318103054 | -0,065702462 | 0 | N.A. | 0 |
| CCDC66   | -0,318327249 | 0,163453608  | 0 | N.A. | 0 |
| ATOX1    | -0,318330968 | -0,511057992 | 0 | N.A. | 0 |
| KAT8     | -0,318746977 | -0,198328389 | 0 | N.A. | 0 |
| FBXO4    | -0,318752543 | -0,186118189 | 0 | N.A. | 0 |
| SDCCAG3  | -0,318800417 | -0,02619933  | 0 | N.A. | 0 |
| ACTL8    | -0,318837346 |              | 0 | N.A. | 0 |
| DCAF4    | -0,318896974 | -0,12140132  | 0 | N.A. | 0 |
| BTF3L4   | -0,319050418 | -0,25616149  | 0 | N.A. | 0 |
| TPR      | -0,319275005 | 0,068905027  | 0 | N.A. | 0 |
| UBL7     | -0,319369509 | -0,141814768 | 0 | N.A. | 0 |
| MESDC2   | -0,319382048 | 0,099510618  | 0 | N.A. | 0 |
| TCEAL8   | -0,319412248 | -0,302262024 | 0 | N.A. | 0 |
| MAK16    | -0,319437896 | -0,26837112  | 0 | N.A. | 0 |
| PFDN5    | -0,319438919 | -0,400679685 | 0 | N.A. | 0 |

|            |              |              |   |      |   |
|------------|--------------|--------------|---|------|---|
| OSGEPL1-AS | -0,319471939 | 0,098468111  | 0 | N.A. | 0 |
| ZC3H13     | -0,319585014 | 0,033518588  | 0 | N.A. | 0 |
| HIBADH     | -0,319592681 | -0,163256234 | 0 | N.A. | 0 |
| PSME3      | -0,320297661 | 0,00387381   | 0 | N.A. | 0 |
| CENPJ      | -0,320312341 | -0,253717135 | 0 | N.A. | 0 |
| SPATS2     | -0,321510194 | -0,13714803  | 0 | N.A. | 0 |
| DIS3L      | -0,321715516 | -0,252421101 | 0 | N.A. | 0 |
| ZNF428     | -0,321914036 | -0,249540489 | 0 | N.A. | 0 |
| TMEM11     | -0,321960172 | -0,215485153 | 0 | N.A. | 0 |
| NUP205     | -0,322056847 | -0,015898555 | 0 | N.A. | 0 |
| TAF1A      | -0,322081777 | -0,219918497 | 0 | N.A. | 0 |
| GLA        | -0,322239271 | -0,3020371   | 0 | N.A. | 0 |
| SNHG15     | -0,322425669 | -0,0991778   | 0 | N.A. | 0 |
| GCAT       | -0,322471453 | -0,434208594 | 0 | N.A. | 0 |
| PSMC6      | -0,322474538 | -0,20118069  | 0 | N.A. | 0 |
| MNAT1      | -0,322643343 | -0,148059024 | 0 | N.A. | 0 |
| RPP25      | -0,322655763 | -0,004696713 | 0 | N.A. | 0 |
| MED4       | -0,322733832 | -0,361053711 | 0 | N.A. | 0 |
| BUD13      | -0,322870741 | -0,170456129 | 0 | N.A. | 0 |
| FAM96B     | -0,322963506 | -0,351464798 | 0 | N.A. | 0 |
| HSD17B8    | -0,323410365 | -0,217922484 | 0 | N.A. | 0 |
| SLC39A3    | -0,323701576 | -0,084508074 | 0 | N.A. | 0 |
| EIF4B      | -0,323822288 | -0,459796537 | 0 | N.A. | 0 |
| SLC35G1    | -0,323823142 | -0,153718019 | 0 | N.A. | 0 |
| PPME1      | -0,323953804 | 0,087041739  | 0 | N.A. | 0 |
| YAE1D1     | -0,324015586 | -0,192709811 | 0 | N.A. | 0 |
| WDR33      | -0,324034901 | -0,148459498 | 0 | N.A. | 0 |
| CDKN1B     | -0,324058134 | -0,228660401 | 0 | N.A. | 0 |
| COMMD10    | -0,324088351 | -0,558463087 | 0 | N.A. | 0 |
| GAPDH      | -0,324296261 | -0,275150248 | 0 | N.A. | 0 |
| VPS25      | -0,324403137 | 0,074967395  | 0 | N.A. | 0 |
| ISY1       | -0,324818877 | 0,022426729  | 0 | N.A. | 0 |
| TCEB1      | -0,324849511 | -0,153509221 | 0 | N.A. | 0 |

|            |              |              |   |      |   |
|------------|--------------|--------------|---|------|---|
| RPUSD2     | -0,324883746 | -0,084524018 | 0 | N.A. | 0 |
| TTF2       | -0,324900503 | -0,201373467 | 0 | N.A. | 0 |
| TAF9B      | -0,325274382 | -0,166985003 | 0 | N.A. | 0 |
| FARS2      | -0,325324205 | -0,231937611 | 0 | N.A. | 0 |
| CGREF1     | -0,325367682 | 0,00101514   | 0 | N.A. | 0 |
| WDR54      | -0,325465704 | -0,092064396 | 0 | N.A. | 0 |
| DPEP1      | -0,325698565 | -0,036760743 | 0 | N.A. | 0 |
| RP11-128M1 | -0,325737088 | -0,26934535  | 0 | N.A. | 0 |
| SBNO1      | -0,325752727 | 0,058545616  | 0 | N.A. | 0 |
| TUBB4B     | -0,325899143 | -0,095706492 | 0 | N.A. | 0 |
| PCBP2      | -0,325980398 | -0,410054763 | 0 | N.A. | 0 |
| XRCC3      | -0,32599917  | -0,19344166  | 0 | N.A. | 0 |
| DUSP23     | -0,326062068 | -0,127231134 | 0 | N.A. | 0 |
| UBTF       | -0,326079069 | 0,060111125  | 0 | N.A. | 0 |
| TMEM129    | -0,326200413 | -0,060711923 | 0 | N.A. | 0 |
| SLC25A32   | -0,326293433 | 0,109442706  | 0 | N.A. | 0 |
| ANKRD32    | -0,326359154 | -0,190826428 | 0 | N.A. | 0 |
| SNX27      | -0,326617741 | 0,390558847  | 0 | N.A. | 0 |
| PDCD11     | -0,327084703 | -0,12133456  | 0 | N.A. | 0 |
| CEP83      | -0,327140702 | -0,112415382 | 0 | N.A. | 0 |
| NFIC       | -0,32734616  | -0,369785467 | 0 | N.A. | 0 |
| CRNKL1     | -0,327563019 | -0,063951312 | 0 | N.A. | 0 |
| DDB1       | -0,327626551 | 0,109818562  | 0 | N.A. | 0 |
| PCNP       | -0,327639316 | -0,45544379  | 0 | N.A. | 0 |
| HOXA10     | -0,327671541 | -0,068487543 | 0 | N.A. | 0 |
| VPS9D1-AS1 | -0,327757475 | -0,174962996 | 0 | N.A. | 0 |
| ADA        | -0,32778306  | -0,176140555 | 0 | N.A. | 0 |
| TSEN2      | -0,327903976 | 0,091609445  | 0 | N.A. | 0 |
| IL17RB     | -0,328032131 | -0,043385581 | 0 | N.A. | 0 |
| RIIAD1     | -0,328333558 | -0,338518868 | 0 | N.A. | 0 |
| VPS51      | -0,328370176 | -0,14466301  | 0 | N.A. | 0 |
| NUP62CL    | -0,328460182 | -0,293915588 | 0 | N.A. | 0 |
| PGAM5      | -0,328628491 | 0,151874878  | 0 | N.A. | 0 |

|          |              |              |   |      |   |
|----------|--------------|--------------|---|------|---|
| CDK2     | -0,328636416 | -0,309989407 | 0 | N.A. | 0 |
| COQ5     | -0,328643061 | -0,216573462 | 0 | N.A. | 0 |
| PRCC     | -0,328724624 | 0,0187828    | 0 | N.A. | 0 |
| C16orf91 | -0,328783008 | -0,170483802 | 0 | N.A. | 0 |
| WDHD1    | -0,328885443 | -0,26542232  | 0 | N.A. | 0 |
| RPP38    | -0,329004401 | 0,02616632   | 0 | N.A. | 0 |
| GFM1     | -0,329201541 | 0,100552458  | 0 | N.A. | 0 |
| HOXA7    | -0,329215839 | -0,264135171 | 0 | N.A. | 0 |
| CORO1A   | -0,329255535 | -0,356766051 | 0 | N.A. | 0 |
| ASB9     | -0,329474552 | -0,31819975  | 0 | N.A. | 0 |
| RNF8     | -0,32980028  | -0,175924829 | 0 | N.A. | 0 |
| PAAF1    | -0,329932718 | -0,060004846 | 0 | N.A. | 0 |
| ATP1A1   | -0,330055647 | 0,104580216  | 0 | N.A. | 0 |
| SCAMP3   | -0,330147332 | -0,21083792  | 0 | N.A. | 0 |
| MAP9     | -0,33017088  | -0,211370938 | 0 | N.A. | 0 |
| PAIP2    | -0,330383454 | -0,322190967 | 0 | N.A. | 0 |
| SLC30A5  | -0,330385675 | -0,365782214 | 0 | N.A. | 0 |
| FLAD1    | -0,330758071 | -0,101735387 | 0 | N.A. | 0 |
| FAM192A  | -0,330780805 | -0,04413221  | 0 | N.A. | 0 |
| HOXA9    | -0,330786808 | 0,092803262  | 0 | N.A. | 0 |
| ANKRD39  | -0,330927091 | -0,110276375 | 0 | N.A. | 0 |
| SCLY     | -0,330999713 | -0,478884892 | 0 | N.A. | 0 |
| CDC25A   | -0,331099552 | -0,21504103  | 0 | N.A. | 0 |
| ARMC1    | -0,33127368  | -0,248292957 | 0 | N.A. | 0 |
| H2AFY2   | -0,3314067   | -0,484130125 | 0 | N.A. | 0 |
| WDR92    | -0,33142313  | -0,308440105 | 0 | N.A. | 0 |
| HAX1     | -0,331692468 | -0,114551234 | 0 | N.A. | 0 |
| NDUFV2   | -0,332215428 | -0,225452411 | 0 | N.A. | 0 |
| TSR1     | -0,33225984  | -0,088745542 | 0 | N.A. | 0 |
| THOC2    | -0,33252432  | 0,159101816  | 0 | N.A. | 0 |
| APTX     | -0,332547968 | -0,245433172 | 0 | N.A. | 0 |
| FUNDC1   | -0,332649011 | -0,217949532 | 0 | N.A. | 0 |
| SMARCA5  | -0,333129172 | -0,088430227 | 0 | N.A. | 0 |

|            |              |              |   |      |   |
|------------|--------------|--------------|---|------|---|
| SUCLA2     | -0,333317218 | -0,157972388 | 0 | N.A. | 0 |
| RNF157     | -0,333483128 | -0,104609701 | 0 | N.A. | 0 |
| ATP1B3     | -0,333598801 | 0,210537267  | 0 | N.A. | 0 |
| ANXA7      | -0,333728921 | -0,066192295 | 0 | N.A. | 0 |
| RFXAP      | -0,334067929 | -0,366480259 | 0 | N.A. | 0 |
| ATF1       | -0,33410652  | -0,284581606 | 0 | N.A. | 0 |
| CYB561A3   | -0,334503724 | -0,051913422 | 0 | N.A. | 0 |
| LINC00998  | -0,334588933 | -0,463938591 | 0 | N.A. | 0 |
| LRWD1      | -0,334882054 | 0,012396068  | 0 | N.A. | 0 |
| XRCC1      | -0,334921191 | -0,121197414 | 0 | N.A. | 0 |
| HSP90B1    | -0,335115168 | 0,068844813  | 0 | N.A. | 0 |
| XXYL1      | -0,335205075 | 0,017788598  | 0 | N.A. | 0 |
| KIAA0586   | -0,335358495 | -0,082396215 | 0 | N.A. | 0 |
| NARS       | -0,335388894 | -0,082902102 | 0 | N.A. | 0 |
| LIN9       | -0,335463248 | -0,358440475 | 0 | N.A. | 0 |
| RAD18      | -0,335518498 | -0,082912873 | 0 | N.A. | 0 |
| PXMP4      | -0,335723692 | -0,087830151 | 0 | N.A. | 0 |
| LSG1       | -0,335948099 | 0,04454454   | 0 | N.A. | 0 |
| SRFBP1     | -0,336110039 | -0,116349253 | 0 | N.A. | 0 |
| SMPD4      | -0,336180504 | -0,165508581 | 0 | N.A. | 0 |
| LINC00116  | -0,336248859 | -0,376336036 | 0 | N.A. | 0 |
| GOT1       | -0,336266134 | -0,285803922 | 0 | N.A. | 0 |
| TBC1D30    | -0,336406605 | -0,241748664 | 0 | N.A. | 0 |
| SEH1L      | -0,336478311 | -0,364336046 | 0 | N.A. | 0 |
| CHDH       | -0,336535542 | -0,028301907 | 0 | N.A. | 0 |
| MYO19      | -0,336668877 | -0,085970603 | 0 | N.A. | 0 |
| GPSM2      | -0,336777759 | -0,176551321 | 0 | N.A. | 0 |
| AC002116.7 | -0,337040188 | -0,139469602 | 0 | N.A. | 0 |
| PPFIA3     | -0,337750402 | -0,18502116  | 0 | N.A. | 0 |
| SEPT11     | -0,337763276 | -0,075724465 | 0 | N.A. | 0 |
| NME1-NME2  | -0,338042672 | -0,388817104 | 0 | N.A. | 0 |
| PPAN       | -0,338067933 | -0,155368424 | 0 | N.A. | 0 |
| SNX2       | -0,338170209 | -0,277115033 | 0 | N.A. | 0 |



|              |              |              |   |      |   |
|--------------|--------------|--------------|---|------|---|
| CASC5        | -0,338413274 | -0,303847293 | 0 | N.A. | 0 |
| SUPV3L1      | -0,338862611 | -0,187948356 | 0 | N.A. | 0 |
| METTL9       | -0,339265255 | -0,128750203 | 0 | N.A. | 0 |
| NDUF5F5      | -0,339321113 | -0,160104177 | 0 | N.A. | 0 |
| SLC25A13     | -0,339486827 | -0,037458571 | 0 | N.A. | 0 |
| MGMT         | -0,339818778 | -0,369183028 | 0 | N.A. | 0 |
| NUDT9        | -0,340110263 | 0,059872358  | 0 | N.A. | 0 |
| USP14        | -0,340130461 | -0,300157739 | 0 | N.A. | 0 |
| ELAC2        | -0,340132566 | -0,27397545  | 0 | N.A. | 0 |
| ZNF593       | -0,340148567 | -0,240134678 | 0 | N.A. | 0 |
| EIF5A11      | -0,340621936 | -0,479891392 | 0 | N.A. | 0 |
| TRIM27       | -0,340629661 | -0,117544902 | 0 | N.A. | 0 |
| NUDT6        | -0,340782378 | -0,358716785 | 0 | N.A. | 0 |
| MXD3         | -0,341036176 | -0,209609761 | 0 | N.A. | 0 |
| CHD4         | -0,341167103 | 0,090422262  | 0 | N.A. | 0 |
| RP9          | -0,341337217 | -0,159614761 | 0 | N.A. | 0 |
| MBD4         | -0,34139971  | -0,206468712 | 0 | N.A. | 0 |
| INTS8        | -0,341524323 | 0,027341513  | 0 | N.A. | 0 |
| PDK2         | -0,341755509 | -0,41554706  | 0 | N.A. | 0 |
| GYG2         | -0,342046498 | -0,143244606 | 0 | N.A. | 0 |
| PEMT         | -0,342235573 | -0,26592387  | 0 | N.A. | 0 |
| DDX10        | -0,342442765 | -0,159227292 | 0 | N.A. | 0 |
| PET117       | -0,3425081   | -0,015854499 | 0 | N.A. | 0 |
| RCCD1        | -0,342616154 | -0,108247104 | 0 | N.A. | 0 |
| ALDH4A1      | -0,342696338 | -0,18564118  | 0 | N.A. | 0 |
| COMMD9       | -0,342731964 | -0,409130252 | 0 | N.A. | 0 |
| RP3-325F22.. | -0,342772776 | -0,190554719 | 0 | N.A. | 0 |
| CTA-29F11.1  | -0,342939146 | -0,103588619 | 0 | N.A. | 0 |
| CCNI2        | -0,342971981 | -0,254639573 | 0 | N.A. | 0 |
| SNAPIN       | -0,343855673 | -0,214235161 | 0 | N.A. | 0 |
| TBC1D7       | -0,343991843 | -0,092128066 | 0 | N.A. | 0 |
| TMEM39B      | -0,343996189 | 0,070549878  | 0 | N.A. | 0 |
| PQBP1        | -0,344643835 | 0,06596604   | 0 | N.A. | 0 |

|          |              |              |   |      |   |
|----------|--------------|--------------|---|------|---|
| COA7     | -0,344743552 | -0,122073224 | 0 | N.A. | 0 |
| GNG4     | -0,344826508 | -0,362682726 | 0 | N.A. | 0 |
| TRMT61B  | -0,344899197 | -0,188113285 | 0 | N.A. | 0 |
| ZRANB3   | -0,344939683 | -0,105154062 | 0 | N.A. | 0 |
| SSSCA1   | -0,345140244 | -0,155399333 | 0 | N.A. | 0 |
| MTG2     | -0,345173086 | -0,134197409 | 0 | N.A. | 0 |
| WDR70    | -0,345204992 | -0,36840458  | 0 | N.A. | 0 |
| HAUS6    | -0,345548378 | -0,182235755 | 0 | N.A. | 0 |
| PFN2     | -0,34560651  | -0,309484118 | 0 | N.A. | 0 |
| CLDN2    | -0,34563956  | -0,032630748 | 0 | N.A. | 0 |
| BARD1    | -0,345650207 | -0,385429273 | 0 | N.A. | 0 |
| SKP1     | -0,345688495 | -0,226679389 | 0 | N.A. | 0 |
| MAD2L2   | -0,345752026 | -0,266602805 | 0 | N.A. | 0 |
| CKMT2    | -0,345892539 | -0,426264306 | 0 | N.A. | 0 |
| TOMM5    | -0,346072858 | -0,395241212 | 0 | N.A. | 0 |
| CREB3L4  | -0,346135667 | -0,362273573 | 0 | N.A. | 0 |
| MIF4GD   | -0,346173943 | -0,165568696 | 0 | N.A. | 0 |
| C10orf2  | -0,346558534 | -0,375110376 | 0 | N.A. | 0 |
| CDC16    | -0,346849776 | 0,245858117  | 0 | N.A. | 0 |
| ASPSCR1  | -0,346880575 | -0,271932737 | 0 | N.A. | 0 |
| NENF     | -0,346884404 | -0,182133078 | 0 | N.A. | 0 |
| PDCD7    | -0,346922351 | 0,202037713  | 0 | N.A. | 0 |
| KLHL23   | -0,347090581 | -0,090178367 | 0 | N.A. | 0 |
| HOXB9    | -0,347225732 | -0,165627486 | 0 | N.A. | 0 |
| PLA2G12A | -0,347405344 | -0,285313714 | 0 | N.A. | 0 |
| NEIL2    | -0,347452593 | -0,370400739 | 0 | N.A. | 0 |
| DDX24    | -0,348038736 | -0,1720633   | 0 | N.A. | 0 |
| HOOK1    | -0,348043341 | 0,079029181  | 0 | N.A. | 0 |
| IFT52    | -0,348165976 | -0,41095806  | 0 | N.A. | 0 |
| ORC5     | -0,348422203 | 0,054856226  | 0 | N.A. | 0 |
| NPHP1    | -0,348458406 | -0,095914735 | 0 | N.A. | 0 |
| EFCAB11  | -0,348855301 | -0,429646845 | 0 | N.A. | 0 |
| SURF6    | -0,348955923 | 0,047770523  | 0 | N.A. | 0 |

|          |              |              |   |      |   |
|----------|--------------|--------------|---|------|---|
| RTN4IP1  | -0,34897148  | -0,245817252 | 0 | N.A. | 0 |
| ACD      | -0,349046226 | -0,128381048 | 0 | N.A. | 0 |
| KIF18B   | -0,349140468 | -0,20374881  | 0 | N.A. | 0 |
| METTL8   | -0,349143403 | -0,318280396 | 0 | N.A. | 0 |
| TSNAX    | -0,34924605  | -0,097508274 | 0 | N.A. | 0 |
| MAP7D2   | -0,349410854 | 0,059257918  | 0 | N.A. | 0 |
| RFXANK   | -0,349413792 | -0,24354718  | 0 | N.A. | 0 |
| BCAS2    | -0,349431256 | -0,152156216 | 0 | N.A. | 0 |
| NT5C     | -0,349540826 | 0,181198946  | 0 | N.A. | 0 |
| MTFR2    | -0,349689099 | -0,407720676 | 0 | N.A. | 0 |
| SLC25A12 | -0,349726729 | 0,091376919  | 0 | N.A. | 0 |
| LEO1     | -0,349821456 | -0,109145884 | 0 | N.A. | 0 |
| RNF126   | -0,349838999 | 0,24580081   | 0 | N.A. | 0 |
| POLQ     | -0,349851597 | -0,362198319 | 0 | N.A. | 0 |
| ZNF580   | -0,349939091 | -0,073519408 | 0 | N.A. | 0 |
| PABPN1   | -0,350065622 | 0,202202458  | 0 | N.A. | 0 |
| EHMT2    | -0,350100384 | -0,238347923 | 0 | N.A. | 0 |
| RDH14    | -0,350166227 | -0,203911843 | 0 | N.A. | 0 |
| MAPKAPK3 | -0,350179797 | -0,50763545  | 0 | N.A. | 0 |
| SAPCD2   | -0,350410827 | -0,280615126 | 0 | N.A. | 0 |
| PRKAR2A  | -0,350491515 | -0,109750979 | 0 | N.A. | 0 |
| CISD3    | -0,350498142 | -0,053395291 | 0 | N.A. | 0 |
| FAM161A  | -0,350506912 | -0,110863241 | 0 | N.A. | 0 |
| TXNDC9   | -0,350564505 | -0,308071991 | 0 | N.A. | 0 |
| CHID1    | -0,350934562 | -0,269727071 | 0 | N.A. | 0 |
| SCML1    | -0,350954897 | -0,339396561 | 0 | N.A. | 0 |
| CEP70    | -0,351137059 | -0,125326334 | 0 | N.A. | 0 |
| DNAAF5   | -0,35114029  | -0,156888908 | 0 | N.A. | 0 |
| CHAMP1   | -0,351212501 | -0,189122133 | 0 | N.A. | 0 |
| GANAB    | -0,351413635 | 0,062047532  | 0 | N.A. | 0 |
| RPAP3    | -0,351504406 | -0,335490339 | 0 | N.A. | 0 |
| CCDC167  | -0,351512026 | -0,283051094 | 0 | N.A. | 0 |
| SPOP     | -0,351636992 | 0,061817668  | 0 | N.A. | 0 |

|            |              |              |   |      |   |
|------------|--------------|--------------|---|------|---|
| TARS2      | -0,351707514 | 0,128188732  | 0 | N.A. | 0 |
| RAD1       | -0,351783757 | -0,370755762 | 0 | N.A. | 0 |
| C10orf32   | -0,351884201 | -0,22447334  | 0 | N.A. | 0 |
| JMJD8      | -0,351907758 | 0,239052604  | 0 | N.A. | 0 |
| FRA10AC1   | -0,351925416 | -0,146124066 | 0 | N.A. | 0 |
| RMDN1      | -0,352001867 | -0,0761864   | 0 | N.A. | 0 |
| MEN1       | -0,352060185 | 0,02413296   | 0 | N.A. | 0 |
| PSMD9      | -0,352164136 | -0,261105977 | 0 | N.A. | 0 |
| TMEM161A   | -0,352206716 | -0,039308783 | 0 | N.A. | 0 |
| TMCO1      | -0,352408323 | 0,491894354  | 0 | N.A. | 0 |
| TSPAN6     | -0,352410197 | -0,079102593 | 0 | N.A. | 0 |
| HDAC8      | -0,352535269 | -0,103972509 | 0 | N.A. | 0 |
| EXTL2      | -0,352684492 | -0,330832446 | 0 | N.A. | 0 |
| AP003774.1 | -0,35288468  | -0,411552678 | 0 | N.A. | 0 |
| UBE2E1     | -0,35299209  | -0,388786241 | 0 | N.A. | 0 |
| LAMTOR1    | -0,353145082 | -0,149748742 | 0 | N.A. | 0 |
| OGFOD2     | -0,35342473  | -0,041477022 | 0 | N.A. | 0 |
| CHD1L      | -0,353645191 | -0,162708636 | 0 | N.A. | 0 |
| FBXO5      | -0,353664246 | -0,278953144 | 0 | N.A. | 0 |
| MTFMT      | -0,353728412 | -0,226668767 | 0 | N.A. | 0 |
| USMG5      | -0,353827089 | -0,369452289 | 0 | N.A. | 0 |
| NCBP1      | -0,353919044 | -0,078299559 | 0 | N.A. | 0 |
| CUL1       | -0,353965976 | 0,029610758  | 0 | N.A. | 0 |
| NUDCD1     | -0,354105213 | -0,241244337 | 0 | N.A. | 0 |
| CKLF       | -0,354129576 | -0,255617715 | 0 | N.A. | 0 |
| DYRK4      | -0,354247446 | -0,389401421 | 0 | N.A. | 0 |
| EIF4EBP1   | -0,354432012 | -0,296638917 | 0 | N.A. | 0 |
| C19orf53   | -0,354519984 | -0,089460631 | 0 | N.A. | 0 |
| UBE2J2     | -0,35455966  | 0,06358021   | 0 | N.A. | 0 |
| UTP23      | -0,354813524 | -0,092089958 | 0 | N.A. | 0 |
| TRAIP      | -0,354883072 | -0,415604963 | 0 | N.A. | 0 |
| ENOSF1     | -0,354973069 | -0,139417709 | 0 | N.A. | 0 |
| PSMC4      | -0,355299111 | -0,402996618 | 0 | N.A. | 0 |

|           |              |              |   |      |   |
|-----------|--------------|--------------|---|------|---|
| CCNH      | -0,355544998 | -0,189571363 | 0 | N.A. | 0 |
| FAM162A   | -0,35565808  | -0,225376425 | 0 | N.A. | 0 |
| C17orf75  | -0,355672894 | -0,151364216 | 0 | N.A. | 0 |
| DDX50     | -0,355874135 | -0,257380628 | 0 | N.A. | 0 |
| CIT       | -0,355954944 | -0,37018975  | 0 | N.A. | 0 |
| ELAC1     | -0,356125466 | 0,141681769  | 0 | N.A. | 0 |
| ALKBH4    | -0,356180195 | -0,181499539 | 0 | N.A. | 0 |
| EIF2S3    | -0,356193174 | -0,42620431  | 0 | N.A. | 0 |
| EIF5      | -0,356546522 | -0,185008188 | 0 | N.A. | 0 |
| MSL3      | -0,35664386  | -0,257898093 | 0 | N.A. | 0 |
| TELO2     | -0,356657853 | -0,114290524 | 0 | N.A. | 0 |
| SSBP4     | -0,356912461 | -0,016602941 | 0 | N.A. | 0 |
| PABPC1    | -0,357087297 | -0,503439155 | 0 | N.A. | 0 |
| RSL24D1   | -0,357561832 | -0,435562889 | 0 | N.A. | 0 |
| MAGED1    | -0,357629847 | -0,13109627  | 0 | N.A. | 0 |
| API5      | -0,357739766 | -0,381260807 | 0 | N.A. | 0 |
| DCAKD     | -0,358011433 | -0,211330083 | 0 | N.A. | 0 |
| CDX1      | -0,358064569 | 0,094652007  | 0 | N.A. | 0 |
| EEF2      | -0,358229309 | -0,440714491 | 0 | N.A. | 0 |
| LINC01184 | -0,358234082 | -0,369864674 | 0 | N.A. | 0 |
| CHCHD10   | -0,358250823 | -0,181160371 | 0 | N.A. | 0 |
| MIR762HG  | -0,358341257 | -0,159433788 | 0 | N.A. | 0 |
| CAT       | -0,358559399 | -0,192958883 | 0 | N.A. | 0 |
| DCTD      | -0,358648867 | -0,338889963 | 0 | N.A. | 0 |
| C4orf46   | -0,358705232 | -0,381135375 | 0 | N.A. | 0 |
| PEX7      | -0,358791777 | -0,01955122  | 0 | N.A. | 0 |
| MTDH      | -0,35899315  | 0,041195972  | 0 | N.A. | 0 |
| EIF2B4    | -0,359010482 | -0,018061161 | 0 | N.A. | 0 |
| ABCB7     | -0,359255156 | -0,123796067 | 0 | N.A. | 0 |
| DDX52     | -0,359360843 | -0,163778506 | 0 | N.A. | 0 |
| LRPPRC    | -0,359440927 | -0,192810788 | 0 | N.A. | 0 |
| TIPIN     | -0,359499943 | -0,512155818 | 0 | N.A. | 0 |
| IPO9      | -0,359528349 | -0,22572992  | 0 | N.A. | 0 |

|             |              |              |   |      |   |
|-------------|--------------|--------------|---|------|---|
| NPRL3       | -0,359546724 | -0,286615446 | 0 | N.A. | 0 |
| NUDT2       | -0,35972551  | -0,224761376 | 0 | N.A. | 0 |
| RNASEH1-AS  | -0,359878955 | -0,40843413  | 0 | N.A. | 0 |
| L1TD1       | -0,360037162 | -0,28188791  | 0 | N.A. | 0 |
| PLK4        | -0,360140889 | -0,337563635 | 0 | N.A. | 0 |
| CHRNA5      | -0,360280283 | -0,044713636 | 0 | N.A. | 0 |
| CDC40       | -0,360360793 | -0,225376976 | 0 | N.A. | 0 |
| MDC1        | -0,360951639 | 0,013110157  | 0 | N.A. | 0 |
| RP11-12G12. | -0,36095879  | -0,402124391 | 0 | N.A. | 0 |
| HAUS5       | -0,360983083 | -0,089732126 | 0 | N.A. | 0 |
| CAD         | -0,361008339 | 0,020043107  | 0 | N.A. | 0 |
| EFTUD2      | -0,361051128 | 0,102760807  | 0 | N.A. | 0 |
| MESP1       | -0,361453377 | -0,171528484 | 0 | N.A. | 0 |
| EIF3A       | -0,36151622  | 0,089061161  | 0 | N.A. | 0 |
| BIN1        | -0,361849579 | -0,177015401 | 0 | N.A. | 0 |
| RBFA        | -0,362532802 | -0,062468242 | 0 | N.A. | 0 |
| C19orf24    | -0,362676822 | -0,064320789 | 0 | N.A. | 0 |
| NDUFS1      | -0,362809519 | 0,086347056  | 0 | N.A. | 0 |
| ZNF326      | -0,362870832 | 0,238961255  | 0 | N.A. | 0 |
| FANCD2      | -0,362937632 | -0,241020019 | 0 | N.A. | 0 |
| METTL10     | -0,362959097 | -0,216729214 | 0 | N.A. | 0 |
| PELP1       | -0,363111341 | -0,091132853 | 0 | N.A. | 0 |
| NT5C3B      | -0,363161793 | -0,585115214 | 0 | N.A. | 0 |
| SNHG21      | -0,363598499 | -0,150336934 | 0 | N.A. | 0 |
| TOMM7       | -0,36363494  | -0,529353941 | 0 | N.A. | 0 |
| SF3B4       | -0,363791692 | -0,112953143 | 0 | N.A. | 0 |
| RP11-245D16 | -0,36392907  | -0,354135193 | 0 | N.A. | 0 |
| TMEM18      | -0,363975534 | -0,00954634  | 0 | N.A. | 0 |
| IPO4        | -0,36398088  | 0,134245993  | 0 | N.A. | 0 |
| COMTD1      | -0,364033788 | 0,083432695  | 0 | N.A. | 0 |
| METAP1      | -0,364159526 | -0,185741337 | 0 | N.A. | 0 |
| TOP1        | -0,364206066 | -0,013791272 | 0 | N.A. | 0 |
| PLGRKT      | -0,364559088 | -0,04311471  | 0 | N.A. | 0 |

|             |              |              |   |      |   |
|-------------|--------------|--------------|---|------|---|
| OXA1L       | -0,364588609 | -0,137859244 | 0 | N.A. | 0 |
| RDM1        | -0,364727973 | -0,36991658  | 0 | N.A. | 0 |
| DUSP12      | -0,364956783 | -0,194298613 | 0 | N.A. | 0 |
| PRIM2       | -0,365010375 | -0,322100489 | 0 | N.A. | 0 |
| NBN         | -0,365483305 | -0,292635039 | 0 | N.A. | 0 |
| VCP         | -0,365522103 | -0,175729237 | 0 | N.A. | 0 |
| EMC4        | -0,365888583 | -0,110335435 | 0 | N.A. | 0 |
| TRMT61A     | -0,365991069 | -0,202631254 | 0 | N.A. | 0 |
| HNRNPH1     | -0,36599569  | -0,152824744 | 0 | N.A. | 0 |
| RCL1        | -0,3663186   | -0,089327719 | 0 | N.A. | 0 |
| C1orf174    | -0,366337158 | -0,313707628 | 0 | N.A. | 0 |
| FN3KRP      | -0,366420961 | -0,251701798 | 0 | N.A. | 0 |
| C1GALT1C1   | -0,36648107  | -0,022529784 | 0 | N.A. | 0 |
| BORA        | -0,366737107 | -0,387005202 | 0 | N.A. | 0 |
| NDUFA7      | -0,366766931 | -0,046191678 | 0 | N.A. | 0 |
| SLC29A1     | -0,36677071  | 0,035470602  | 0 | N.A. | 0 |
| DHODH       | -0,367567631 | -0,178628868 | 0 | N.A. | 0 |
| POMP        | -0,367581413 | -0,311962977 | 0 | N.A. | 0 |
| E2F8        | -0,367730865 | -0,444224382 | 0 | N.A. | 0 |
| MMS22L      | -0,367938604 | -0,170991042 | 0 | N.A. | 0 |
| JPX         | -0,367939602 | -0,277099069 | 0 | N.A. | 0 |
| PIGU        | -0,367964309 | 0,029862551  | 0 | N.A. | 0 |
| SLC25A19    | -0,367968502 | -0,420128173 | 0 | N.A. | 0 |
| CMC2        | -0,367995107 | -0,352677829 | 0 | N.A. | 0 |
| FAM98B      | -0,368059915 | -0,02576156  | 0 | N.A. | 0 |
| RP11-329L6. | -0,368174451 | -0,182749819 | 0 | N.A. | 0 |
| KIF5B       | -0,36824294  | 0,091308789  | 0 | N.A. | 0 |
| ZNF771      | -0,36828663  | -0,209589301 | 0 | N.A. | 0 |
| SYPL1       | -0,3684598   | -0,056907371 | 0 | N.A. | 0 |
| PNKD        | -0,368460626 | -0,030396767 | 0 | N.A. | 0 |
| CAMKMT      | -0,368622543 | -0,373066794 | 0 | N.A. | 0 |
| SUV39H1     | -0,36863017  | -0,279013859 | 0 | N.A. | 0 |
| TMEM230     | -0,368720525 | -0,534195762 | 0 | N.A. | 0 |

|           |              |              |   |      |   |
|-----------|--------------|--------------|---|------|---|
| DPH7      | -0,368794003 | -0,329792882 | 0 | N.A. | 0 |
| DONSON    | -0,369052935 | 0,012137867  | 0 | N.A. | 0 |
| CCNE1     | -0,36906618  | -0,173608377 | 0 | N.A. | 0 |
| COPS8     | -0,369121174 | -0,256194683 | 0 | N.A. | 0 |
| EXOSC1    | -0,369138423 | -0,318602411 | 0 | N.A. | 0 |
| POLA1     | -0,369189503 | -0,125980665 | 0 | N.A. | 0 |
| C12orf29  | -0,369247492 | -0,376188725 | 0 | N.A. | 0 |
| GCFC2     | -0,369498749 | -0,34020338  | 0 | N.A. | 0 |
| SFXN2     | -0,369631397 | -0,237932639 | 0 | N.A. | 0 |
| ERI2      | -0,369761287 | -0,191906848 | 0 | N.A. | 0 |
| G6PD      | -0,36988704  | -0,153049472 | 0 | N.A. | 0 |
| PGRMC1    | -0,370010272 | 0,153275376  | 0 | N.A. | 0 |
| FASTKD2   | -0,370043933 | -0,154965186 | 0 | N.A. | 0 |
| MARCKSL1  | -0,370187811 | -0,112239436 | 0 | N.A. | 0 |
| OTUD6B    | -0,370248595 | -0,348237007 | 0 | N.A. | 0 |
| IFT43     | -0,370373185 | -0,13153741  | 0 | N.A. | 0 |
| TMEM205   | -0,370683432 | 0,089284749  | 0 | N.A. | 0 |
| MCM8      | -0,370813666 | -0,112320173 | 0 | N.A. | 0 |
| YBX2      | -0,370987101 | -0,196549518 | 0 | N.A. | 0 |
| DOHH      | -0,371058912 | -0,149077934 | 0 | N.A. | 0 |
| TRIM28    | -0,371398103 | -0,079488395 | 0 | N.A. | 0 |
| GUSB      | -0,371912567 | -0,228875356 | 0 | N.A. | 0 |
| MTHFS     | -0,371913699 | -0,293061201 | 0 | N.A. | 0 |
| RPUSD4    | -0,372083539 | -0,209229461 | 0 | N.A. | 0 |
| ALG6      | -0,372226733 | -0,141263162 | 0 | N.A. | 0 |
| PTTG2     | -0,372267094 | -0,042788703 | 0 | N.A. | 0 |
| ARHGAP11B | -0,372477367 | -0,063093044 | 0 | N.A. | 0 |
| DPH6      | -0,37247861  | -0,023877555 | 0 | N.A. | 0 |
| DUSP2     | -0,372635225 | -0,230732109 | 0 | N.A. | 0 |
| FAHD2A    | -0,372877407 | -0,334748188 | 0 | N.A. | 0 |
| LRRC47    | -0,372949622 | -0,041761023 | 0 | N.A. | 0 |
| IFITM3    | -0,373032341 | -0,443631783 | 0 | N.A. | 0 |
| EIF2S2    | -0,373419188 | 0,004581725  | 0 | N.A. | 0 |



|          |              |              |   |      |   |
|----------|--------------|--------------|---|------|---|
| DPP3     | -0,373511724 | 0,086837108  | 0 | N.A. | 0 |
| TEAD4    | -0,373548547 | -0,2486619   | 0 | N.A. | 0 |
| PRPF4    | -0,373589785 | -0,026052761 | 0 | N.A. | 0 |
| UTP14A   | -0,373809753 | 0,059275117  | 0 | N.A. | 0 |
| SCLT1    | -0,373842261 | -0,31798122  | 0 | N.A. | 0 |
| PHGDH    | -0,374060849 | -0,326382055 | 0 | N.A. | 0 |
| SMYD5    | -0,374074955 | 0,120735559  | 0 | N.A. | 0 |
| CEP78    | -0,374402877 | -0,190388492 | 0 | N.A. | 0 |
| SDHA     | -0,374429511 | -0,041602421 | 0 | N.A. | 0 |
| SUSD3    | -0,374492285 | -0,402721198 | 0 | N.A. | 0 |
| TSSC1    | -0,374516308 | -0,360479159 | 0 | N.A. | 0 |
| RHNO1    | -0,374639835 | -0,198929248 | 0 | N.A. | 0 |
| MRM1     | -0,374724502 | -0,064689935 | 0 | N.A. | 0 |
| IFT22    | -0,37472844  | -0,412439431 | 0 | N.A. | 0 |
| CDC7     | -0,374844882 | -0,294610245 | 0 | N.A. | 0 |
| MEA1     | -0,375006326 | -0,283745685 | 0 | N.A. | 0 |
| POLR1E   | -0,375052762 | -0,188554669 | 0 | N.A. | 0 |
| ACP6     | -0,375186554 | -0,257100878 | 0 | N.A. | 0 |
| NDRG2    | -0,37541008  | -0,002468778 | 0 | N.A. | 0 |
| SSR3     | -0,375441565 | -0,276747125 | 0 | N.A. | 0 |
| ILF3-AS1 | -0,375462458 | -0,001876008 | 0 | N.A. | 0 |
| GEMIN2   | -0,375507973 | -0,407063641 | 0 | N.A. | 0 |
| WRAP53   | -0,37552731  | -0,081824043 | 0 | N.A. | 0 |
| MECR     | -0,375567102 | -0,348508469 | 0 | N.A. | 0 |
| ORMDL1   | -0,375711129 | -0,270488473 | 0 | N.A. | 0 |
| NELFE    | -0,376082886 | -0,228310576 | 0 | N.A. | 0 |
| ACSS1    | -0,376188741 | -0,043143931 | 0 | N.A. | 0 |
| INCENP   | -0,376492231 | -0,287886248 | 0 | N.A. | 0 |
| CEP57    | -0,376622801 | -0,063920832 | 0 | N.A. | 0 |
| ARPC5L   | -0,376731062 | -0,039527372 | 0 | N.A. | 0 |
| TRMT11   | -0,376789221 | -0,308084051 | 0 | N.A. | 0 |
| QTRT1    | -0,376909204 | -0,171920975 | 0 | N.A. | 0 |
| UFD1L    | -0,377598428 | -0,276694099 | 0 | N.A. | 0 |

|          |              |              |   |      |   |
|----------|--------------|--------------|---|------|---|
| AADAT    | -0,377636048 | -0,36220033  | 0 | N.A. | 0 |
| GRK6     | -0,377647754 | -0,281997588 | 0 | N.A. | 0 |
| CEBPZOS  | -0,377713148 | -0,134597038 | 0 | N.A. | 0 |
| RIF1     | -0,377811691 | 0,007570086  | 0 | N.A. | 0 |
| PDIA3    | -0,377823694 | 0,016955702  | 0 | N.A. | 0 |
| PITHD1   | -0,377848889 | -0,314185774 | 0 | N.A. | 0 |
| SARS2    | -0,377879708 | -0,204066149 | 0 | N.A. | 0 |
| C12orf65 | -0,377962143 | -0,233046287 | 0 | N.A. | 0 |
| SEC13    | -0,37826902  | -0,20935466  | 0 | N.A. | 0 |
| NEK6     | -0,378379652 | -0,231854733 | 0 | N.A. | 0 |
| ACAT2    | -0,378406961 | -0,091440343 | 0 | N.A. | 0 |
| CENPI    | -0,378600222 | -0,002171143 | 0 | N.A. | 0 |
| CWC15    | -0,3789084   | -0,27069274  | 0 | N.A. | 0 |
| WVOX     | -0,378916515 | -0,263742463 | 0 | N.A. | 0 |
| KIF14    | -0,378934845 | -0,203588055 | 0 | N.A. | 0 |
| TRIT1    | -0,378940029 | -0,191683387 | 0 | N.A. | 0 |
| PSMC3IP  | -0,379156305 | -0,393885898 | 0 | N.A. | 0 |
| FAM98A   | -0,379206852 | -0,253466463 | 0 | N.A. | 0 |
| MOCS2    | -0,379221203 | -0,392849244 | 0 | N.A. | 0 |
| ALG1     | -0,379275782 | -0,067467702 | 0 | N.A. | 0 |
| ORC3     | -0,379714614 | -0,359773667 | 0 | N.A. | 0 |
| CKAP2L   | -0,379971296 | -0,214944016 | 0 | N.A. | 0 |
| EEF2KMT  | -0,380000336 | -0,191511656 | 0 | N.A. | 0 |
| RTCB     | -0,380031602 | 0,074601522  | 0 | N.A. | 0 |
| HTRA2    | -0,380138896 | -0,299076732 | 0 | N.A. | 0 |
| METTL13  | -0,380308863 | 0,005339365  | 0 | N.A. | 0 |
| PNPO     | -0,380317545 | -0,378533464 | 0 | N.A. | 0 |
| MMADHC   | -0,380779345 | -0,156108076 | 0 | N.A. | 0 |
| PARP2    | -0,380985599 | -0,189268345 | 0 | N.A. | 0 |
| NFYB     | -0,381015139 | -0,40389208  | 0 | N.A. | 0 |
| PRADC1   | -0,381096731 | -0,051419138 | 0 | N.A. | 0 |
| DGCR6L   | -0,381100129 | -0,353470849 | 0 | N.A. | 0 |
| EIF2B1   | -0,381232902 | -0,267610137 | 0 | N.A. | 0 |

|          |              |              |   |      |   |
|----------|--------------|--------------|---|------|---|
| DNTTIP2  | -0,381284165 | -0,150161419 | 0 | N.A. | 0 |
| GIN54    | -0,381424341 | -0,266176942 | 0 | N.A. | 0 |
| NUDT16L1 | -0,381481243 | -0,115068344 | 0 | N.A. | 0 |
| FAM72D   | -0,381716325 | -0,056354487 | 0 | N.A. | 0 |
| FAU      | -0,381835601 | -0,430771275 | 0 | N.A. | 0 |
| SLC25A4  | -0,38194649  | -0,104957893 | 0 | N.A. | 0 |
| FAF1     | -0,382010505 | -0,291145645 | 0 | N.A. | 0 |
| PXMP2    | -0,382205538 | -0,13643861  | 0 | N.A. | 0 |
| PIN4     | -0,382250961 | -0,322582591 | 0 | N.A. | 0 |
| PSMA1    | -0,382270846 | -0,452928397 | 0 | N.A. | 0 |
| CPNE1    | -0,382503393 | -0,01715805  | 0 | N.A. | 0 |
| TOMM20   | -0,382721164 | -0,375956637 | 0 | N.A. | 0 |
| WDR62    | -0,382865336 | -0,045397148 | 0 | N.A. | 0 |
| PNN      | -0,382914777 | 0,068189919  | 0 | N.A. | 0 |
| HMCES    | -0,382953451 | -0,150445665 | 0 | N.A. | 0 |
| SLC25A6  | -0,383100665 | -0,550344732 | 0 | N.A. | 0 |
| KNOP1    | -0,383134964 | 0,018363501  | 0 | N.A. | 0 |
| TRNT1    | -0,383136577 | -0,376402843 | 0 | N.A. | 0 |
| DRG2     | -0,383331756 | -0,11805917  | 0 | N.A. | 0 |
| POLR1C   | -0,38349292  | -0,215027716 | 0 | N.A. | 0 |
| TACO1    | -0,383574997 | -0,063080916 | 0 | N.A. | 0 |
| PYCRL    | -0,383602978 | -0,367761394 | 0 | N.A. | 0 |
| LRRC45   | -0,383624714 | -0,326019983 | 0 | N.A. | 0 |
| WBP11    | -0,383641703 | -0,145313817 | 0 | N.A. | 0 |
| MED21    | -0,38377492  | -0,402776513 | 0 | N.A. | 0 |
| PIGX     | -0,384125796 | 0,142068041  | 0 | N.A. | 0 |
| PSMC1    | -0,384188315 | -0,308013073 | 0 | N.A. | 0 |
| KDELC2   | -0,384500164 | -0,185672197 | 0 | N.A. | 0 |
| FOPNL    | -0,384587595 | -0,320050258 | 0 | N.A. | 0 |
| CREG1    | -0,384610567 | -0,251552173 | 0 | N.A. | 0 |
| HBS1L    | -0,384625071 | -0,149527457 | 0 | N.A. | 0 |
| LIAS     | -0,385073363 | -0,507778447 | 0 | N.A. | 0 |
| DFFA     | -0,385140509 | -0,46828916  | 0 | N.A. | 0 |

|          |              |              |   |      |   |
|----------|--------------|--------------|---|------|---|
| FIS1     | -0,385469253 | -0,248875768 | 0 | N.A. | 0 |
| IDH1     | -0,385943247 | -0,194275861 | 0 | N.A. | 0 |
| COMMD7   | -0,385959177 | -0,367566727 | 0 | N.A. | 0 |
| RWDD4    | -0,386161317 | -0,191189922 | 0 | N.A. | 0 |
| C1orf43  | -0,3862      | 0,135592007  | 0 | N.A. | 0 |
| AKT1S1   | -0,386206119 | -0,240565954 | 0 | N.A. | 0 |
| XRCC6BP1 | -0,386230385 | -0,214098782 | 0 | N.A. | 0 |
| ATP5SL   | -0,386264339 | -0,020497886 | 0 | N.A. | 0 |
| SORD     | -0,386572525 | -0,215623402 | 0 | N.A. | 0 |
| USP48    | -0,386674501 | -0,236012453 | 0 | N.A. | 0 |
| MED28    | -0,386838662 | -0,380057563 | 0 | N.A. | 0 |
| ARF1     | -0,386898891 | 0,057542999  | 0 | N.A. | 0 |
| EIF2B5   | -0,387023402 | -0,197866851 | 0 | N.A. | 0 |
| VPS35    | -0,387107148 | 0,104227157  | 0 | N.A. | 0 |
| PRKAG1   | -0,387129075 | -0,233482492 | 0 | N.A. | 0 |
| CALM1    | -0,387207949 | -0,147346085 | 0 | N.A. | 0 |
| RIOK2    | -0,38727924  | -0,107585007 | 0 | N.A. | 0 |
| MAF1     | -0,387597459 | -0,404916638 | 0 | N.A. | 0 |
| SPR      | -0,387664817 | 0,216458479  | 0 | N.A. | 0 |
| WDR3     | -0,387777894 | -0,20764397  | 0 | N.A. | 0 |
| DYNC1LI1 | -0,387813632 | -0,150685438 | 0 | N.A. | 0 |
| DHRS4L2  | -0,38781819  | -0,064022771 | 0 | N.A. | 0 |
| SLC25A15 | -0,388089065 | -0,239713283 | 0 | N.A. | 0 |
| CDCA2    | -0,388291881 | -0,272090712 | 0 | N.A. | 0 |
| DPH5     | -0,388328268 | -0,520767381 | 0 | N.A. | 0 |
| PRMT5    | -0,388653692 | -0,176094693 | 0 | N.A. | 0 |
| C9orf152 | -0,38865769  | -0,251795739 | 0 | N.A. | 0 |
| THEM6    | -0,388767756 | 0,194339212  | 0 | N.A. | 0 |
| ACTR3B   | -0,388992079 | -0,205312207 | 0 | N.A. | 0 |
| WRAP73   | -0,38899422  | -0,081679637 | 0 | N.A. | 0 |
| ARF5     | -0,389216869 | -0,230678001 | 0 | N.A. | 0 |
| TIPRL    | -0,389266706 | -0,491674549 | 0 | N.A. | 0 |
| TESC     | -0,389395861 | 0,04329681   | 0 | N.A. | 0 |

|          |              |              |   |      |   |
|----------|--------------|--------------|---|------|---|
| PLRG1    | -0,389554694 | -0,372539294 | 0 | N.A. | 0 |
| ARL16    | -0,38986024  | -0,231868556 | 0 | N.A. | 0 |
| NUBPL    | -0,389939634 | -0,247472156 | 0 | N.A. | 0 |
| ANAPC13  | -0,390017568 | -0,425737257 | 0 | N.A. | 0 |
| KDM1A    | -0,390027027 | 0,015686902  | 0 | N.A. | 0 |
| ACAD9    | -0,390208466 | -0,008754904 | 0 | N.A. | 0 |
| DNAJA3   | -0,390219619 | -0,16180095  | 0 | N.A. | 0 |
| THG1L    | -0,390333671 | -0,43610823  | 0 | N.A. | 0 |
| HMOX2    | -0,390342519 | 0,005655056  | 0 | N.A. | 0 |
| PRR7     | -0,390425733 | -0,207118529 | 0 | N.A. | 0 |
| SGOL2    | -0,390534183 | -0,26131201  | 0 | N.A. | 0 |
| TXNL1    | -0,390548155 | -0,327798105 | 0 | N.A. | 0 |
| ZBED3    | -0,390769212 | -0,264469015 | 0 | N.A. | 0 |
| PDHX     | -0,391156243 | -0,188420903 | 0 | N.A. | 0 |
| C9orf114 | -0,391165933 | -0,338984894 | 0 | N.A. | 0 |
| OXCT1    | -0,391525427 | -0,137970831 | 0 | N.A. | 0 |
| NUP107   | -0,391577998 | 0,010902049  | 0 | N.A. | 0 |
| NCBP2    | -0,391584639 | -0,354090382 | 0 | N.A. | 0 |
| NDUFV3   | -0,391615005 | -0,265641213 | 0 | N.A. | 0 |
| MTHFD2L  | -0,391627937 | -0,336917351 | 0 | N.A. | 0 |
| SAP18    | -0,391747703 | -0,244078907 | 0 | N.A. | 0 |
| TGDS     | -0,391941002 | -0,043142264 | 0 | N.A. | 0 |
| DPM2     | -0,39208704  | -0,178174933 | 0 | N.A. | 0 |
| UQCRHL   | -0,392476949 | -0,315276518 | 0 | N.A. | 0 |
| GRHPR    | -0,392838765 | -0,1143684   | 0 | N.A. | 0 |
| RTFDC1   | -0,392851383 | -0,375942795 | 0 | N.A. | 0 |
| MACROD1  | -0,392877136 | -0,325960564 | 0 | N.A. | 0 |
| CENPO    | -0,393020876 | -0,131237258 | 0 | N.A. | 0 |
| POLR2J   | -0,393034508 | -0,213377373 | 0 | N.A. | 0 |
| RRP1     | -0,393049723 | 0,035593998  | 0 | N.A. | 0 |
| NOC4L    | -0,393095155 | -0,33962704  | 0 | N.A. | 0 |
| TMEM183A | -0,393096528 | -0,245436717 | 0 | N.A. | 0 |
| METTL21A | -0,393102844 | -0,217515721 | 0 | N.A. | 0 |

|          |              |              |   |      |   |
|----------|--------------|--------------|---|------|---|
| PBDC1    | -0,393159998 | 0,193896649  | 0 | N.A. | 0 |
| NUP54    | -0,393288602 | -0,214622537 | 0 | N.A. | 0 |
| RNASEH1  | -0,393488686 | -0,072331427 | 0 | N.A. | 0 |
| RALY     | -0,393673245 | -0,169637238 | 0 | N.A. | 0 |
| TMEM223  | -0,393763312 | 0,208123801  | 0 | N.A. | 0 |
| TCEA1    | -0,394085969 | -0,513525004 | 0 | N.A. | 0 |
| SNW1     | -0,394140037 | -0,186368872 | 0 | N.A. | 0 |
| USP2-AS1 | -0,39417088  | -0,300183753 | 0 | N.A. | 0 |
| POLA2    | -0,394234105 | -0,100119572 | 0 | N.A. | 0 |
| NOA1     | -0,394253651 | -0,131131779 | 0 | N.A. | 0 |
| SMYD2    | -0,394354329 | -0,505586968 | 0 | N.A. | 0 |
| PGAP2    | -0,394445329 | -0,300585402 | 0 | N.A. | 0 |
| FDX1L    | -0,394683186 | -0,193738545 | 0 | N.A. | 0 |
| GCA      | -0,395007641 | -0,309197051 | 0 | N.A. | 0 |
| MVK      | -0,395345959 | -0,037696    | 0 | N.A. | 0 |
| GCHFR    | -0,395759625 | -0,094552509 | 0 | N.A. | 0 |
| TCF19    | -0,396257555 | -0,187675915 | 0 | N.A. | 0 |
| STXBP6   | -0,396344326 | -0,116169708 | 0 | N.A. | 0 |
| NT5DC1   | -0,396603089 | -0,207992182 | 0 | N.A. | 0 |
| UTP6     | -0,396690706 | -0,189250646 | 0 | N.A. | 0 |
| GLT8D1   | -0,396760977 | -0,270153193 | 0 | N.A. | 0 |
| VSNL1    | -0,396872885 | -0,36148693  | 0 | N.A. | 0 |
| RRP1B    | -0,396874075 | -0,190654517 | 0 | N.A. | 0 |
| EXOSC4   | -0,397066539 | -0,071629299 | 0 | N.A. | 0 |
| ANLN     | -0,397118491 | -0,271996736 | 0 | N.A. | 0 |
| SCCPDH   | -0,397780407 | -0,145211575 | 0 | N.A. | 0 |
| BRAT1    | -0,398006062 | 0,095131928  | 0 | N.A. | 0 |
| CIAO1    | -0,398193048 | 0,047593155  | 0 | N.A. | 0 |
| TBCD     | -0,398510802 | -0,064986    | 0 | N.A. | 0 |
| FOXRED1  | -0,398768571 | -0,383480142 | 0 | N.A. | 0 |
| IK       | -0,398887247 | -0,215678374 | 0 | N.A. | 0 |
| EXO1     | -0,399073904 | -0,307936644 | 0 | N.A. | 0 |
| OSTC     | -0,39955043  | -0,272661796 | 0 | N.A. | 0 |

|          |              |              |   |      |   |
|----------|--------------|--------------|---|------|---|
| TIMM9    | -0,399578587 | -0,458791835 | 0 | N.A. | 0 |
| HDDC3    | -0,399725191 | -0,166277272 | 0 | N.A. | 0 |
| MGME1    | -0,399947539 | -0,097194883 | 0 | N.A. | 0 |
| MYC      | -0,40001019  | -0,194765038 | 0 | N.A. | 0 |
| KXD1     | -0,400029065 | -0,377021031 | 0 | N.A. | 0 |
| SDAD1    | -0,400086795 | 0,056219446  | 0 | N.A. | 0 |
| NOB1     | -0,400098776 | -0,276576872 | 0 | N.A. | 0 |
| FAM204A  | -0,400108359 | -0,176413258 | 0 | N.A. | 0 |
| TAMM41   | -0,400230295 | -0,283463591 | 0 | N.A. | 0 |
| ORC1     | -0,400238415 | -0,365178745 | 0 | N.A. | 0 |
| TMEM177  | -0,400288201 | -0,13201622  | 0 | N.A. | 0 |
| FRG1     | -0,400338188 | 0,033267338  | 0 | N.A. | 0 |
| FUS      | -0,400388117 | 0,040965407  | 0 | N.A. | 0 |
| HADHB    | -0,400414039 | -0,204105449 | 0 | N.A. | 0 |
| OCIAD1   | -0,400801474 | -0,178842823 | 0 | N.A. | 0 |
| MRE11A   | -0,400844975 | -0,371338777 | 0 | N.A. | 0 |
| RBX1     | -0,401191909 | -0,309465059 | 0 | N.A. | 0 |
| FANCA    | -0,401230898 | -0,116481678 | 0 | N.A. | 0 |
| NKRF     | -0,401261919 | -0,110660089 | 0 | N.A. | 0 |
| ALDH16A1 | -0,401409809 | 0,013489885  | 0 | N.A. | 0 |
| MCRS1    | -0,401495503 | -0,356242382 | 0 | N.A. | 0 |
| H2AFX    | -0,401508736 | -0,38719063  | 0 | N.A. | 0 |
| LRRC59   | -0,401560592 | -0,216376338 | 0 | N.A. | 0 |
| ATRAID   | -0,401785076 | -0,149003057 | 0 | N.A. | 0 |
| SAP30    | -0,40192065  | -0,015827517 | 0 | N.A. | 0 |
| PSPC1    | -0,401995116 | -0,04217888  | 0 | N.A. | 0 |
| ASRGL1   | -0,402038209 | -0,359804607 | 0 | N.A. | 0 |
| BRI3BP   | -0,402515571 | 0,088163922  | 0 | N.A. | 0 |
| THOC6    | -0,402822826 | -0,396484963 | 0 | N.A. | 0 |
| SLC12A2  | -0,4028841   | -0,08540291  | 0 | N.A. | 0 |
| KATNB1   | -0,402932977 | -0,085288784 | 0 | N.A. | 0 |
| SLC38A5  | -0,403300014 | 0,318906968  | 0 | N.A. | 0 |
| ATP6V0E2 | -0,403578499 | -0,1973323   | 0 | N.A. | 0 |

|          |              |              |   |      |   |
|----------|--------------|--------------|---|------|---|
| FANCG    | -0,403840306 | -0,18299477  | 0 | N.A. | 0 |
| UBAC1    | -0,403948688 | -0,223120882 | 0 | N.A. | 0 |
| GAL      | -0,404118176 | -0,252584196 | 0 | N.A. | 0 |
| NDC80    | -0,40441674  | -0,470246481 | 0 | N.A. | 0 |
| FAM216A  | -0,404719327 | -0,316205899 | 0 | N.A. | 0 |
| MCMBP    | -0,40474383  | -0,20606412  | 0 | N.A. | 0 |
| YARS2    | -0,404826202 | -0,253107157 | 0 | N.A. | 0 |
| RECQL4   | -0,404878032 | -0,311947753 | 0 | N.A. | 0 |
| CCDC28B  | -0,405253335 | -0,267628675 | 0 | N.A. | 0 |
| TMEM186  | -0,405407759 | 0,005526581  | 0 | N.A. | 0 |
| ETV4     | -0,405663542 | -0,207312748 | 0 | N.A. | 0 |
| MYL6B    | -0,405689642 | -0,43578862  | 0 | N.A. | 0 |
| CFAP36   | -0,405849843 | -0,244179167 | 0 | N.A. | 0 |
| CCDC137  | -0,40588343  | 0,164157316  | 0 | N.A. | 0 |
| PM20D2   | -0,405894902 | -0,245664455 | 0 | N.A. | 0 |
| FAM58A   | -0,405935662 | -0,18798205  | 0 | N.A. | 0 |
| PTPRO    | -0,406056121 | -0,33727652  | 0 | N.A. | 0 |
| TGS1     | -0,406532577 | 0,169769667  | 0 | N.A. | 0 |
| RFT1     | -0,406746979 | -0,074063529 | 0 | N.A. | 0 |
| KIF18A   | -0,40694898  | -0,097822966 | 0 | N.A. | 0 |
| UBE2I    | -0,406983791 | -0,216834532 | 0 | N.A. | 0 |
| BAG2     | -0,40705039  | -0,516387794 | 0 | N.A. | 0 |
| TMEM109  | -0,407058639 | -0,046193931 | 0 | N.A. | 0 |
| CHORDC1  | -0,407086252 | -0,428487408 | 0 | N.A. | 0 |
| GRWD1    | -0,407268862 | -0,202544176 | 0 | N.A. | 0 |
| EIF4E    | -0,407498459 | -0,4729904   | 0 | N.A. | 0 |
| SMC6     | -0,407530774 | -0,02476793  | 0 | N.A. | 0 |
| MCAT     | -0,407850014 | -0,313416069 | 0 | N.A. | 0 |
| CSTF2    | -0,407897925 | -0,285075267 | 0 | N.A. | 0 |
| TXLNG    | -0,407932686 | -0,129811372 | 0 | N.A. | 0 |
| RPGRIP1L | -0,408105513 | -0,376079586 | 0 | N.A. | 0 |
| MINA     | -0,40817836  | -0,169587615 | 0 | N.A. | 0 |
| GTF2F2   | -0,408559382 | -0,041218819 | 0 | N.A. | 0 |



|           |              |              |   |      |   |
|-----------|--------------|--------------|---|------|---|
| C1orf112  | -0,408574091 | -0,332729263 | 0 | N.A. | 0 |
| TOP1MT    | -0,408974672 | -0,219100635 | 0 | N.A. | 0 |
| MSH2      | -0,409170709 | -0,312439059 | 0 | N.A. | 0 |
| FAIM      | -0,409188483 | -0,078699368 | 0 | N.A. | 0 |
| TAF6      | -0,409237431 | -0,225479203 | 0 | N.A. | 0 |
| PPIE      | -0,409464861 | -0,234328119 | 0 | N.A. | 0 |
| TMEM98    | -0,409639627 | -0,037783993 | 0 | N.A. | 0 |
| MPHOSPH6  | -0,409873641 | -0,487798122 | 0 | N.A. | 0 |
| ZNF695    | -0,409882027 | -0,441323859 | 0 | N.A. | 0 |
| SLC5A6    | -0,409902649 | -0,110222995 | 0 | N.A. | 0 |
| SLC35B2   | -0,410109026 | -0,089139359 | 0 | N.A. | 0 |
| MIS18BP1  | -0,410163031 | -0,307187958 | 0 | N.A. | 0 |
| RGMB      | -0,410328093 | -0,20216373  | 0 | N.A. | 0 |
| TTC26     | -0,410341067 | -0,179321067 | 0 | N.A. | 0 |
| EARS2     | -0,41045316  | -0,207941083 | 0 | N.A. | 0 |
| VIL1      | -0,410606353 | 0,155132596  | 0 | N.A. | 0 |
| TRMU      | -0,410769409 | -0,323887469 | 0 | N.A. | 0 |
| METTL3    | -0,410796877 | -0,218785326 | 0 | N.A. | 0 |
| UQCC1     | -0,410851595 | 0,056676816  | 0 | N.A. | 0 |
| TEX264    | -0,410962184 | 0,118616983  | 0 | N.A. | 0 |
| SNHG19    | -0,41103041  | -0,417978447 | 0 | N.A. | 0 |
| TTC27     | -0,411159382 | -0,255263905 | 0 | N.A. | 0 |
| GLOD4     | -0,411160255 | -0,319814212 | 0 | N.A. | 0 |
| NXT1      | -0,411206871 | -0,325126467 | 0 | N.A. | 0 |
| FUBP1     | -0,411560032 | -0,006263276 | 0 | N.A. | 0 |
| PPP5C     | -0,411759055 | -0,167743036 | 0 | N.A. | 0 |
| PPP2R1A   | -0,412114213 | 0,049981234  | 0 | N.A. | 0 |
| TRAPPC1   | -0,412181688 | -0,380097818 | 0 | N.A. | 0 |
| LINC01315 | -0,412278255 | -0,34324849  | 0 | N.A. | 0 |
| LAPTM4B   | -0,412362633 | 0,007664337  | 0 | N.A. | 0 |
| TMEM9     | -0,412621597 | 0,32005787   | 0 | N.A. | 0 |
| MGST2     | -0,412653459 | 0,093286918  | 0 | N.A. | 0 |
| ABCF1     | -0,412865387 | -0,018482848 | 0 | N.A. | 0 |

|           |              |              |   |      |   |
|-----------|--------------|--------------|---|------|---|
| IDH3G     | -0,413033851 | -0,137846415 | 0 | N.A. | 0 |
| GNPNAT1   | -0,413231064 | -0,488485479 | 0 | N.A. | 0 |
| APPL1     | -0,413272608 | -0,10524491  | 0 | N.A. | 0 |
| FAH       | -0,413362244 | -0,445251184 | 0 | N.A. | 0 |
| INTS10    | -0,413386261 | -0,161492207 | 0 | N.A. | 0 |
| DTWD1     | -0,413427159 | -0,435632425 | 0 | N.A. | 0 |
| JAGN1     | -0,413567027 | 0,075173944  | 0 | N.A. | 0 |
| SPG21     | -0,4136229   | -0,383937336 | 0 | N.A. | 0 |
| ISCU      | -0,413738438 | -0,418265822 | 0 | N.A. | 0 |
| BRCC3     | -0,413857228 | -0,060141696 | 0 | N.A. | 0 |
| R3HDM1    | -0,414110381 | -0,365317956 | 0 | N.A. | 0 |
| CHAF1B    | -0,414297754 | -0,234177841 | 0 | N.A. | 0 |
| FUNDC2    | -0,414307226 | -0,414075078 | 0 | N.A. | 0 |
| RPP25L    | -0,414519024 | -0,187507306 | 0 | N.A. | 0 |
| EPHB2     | -0,414602488 | -0,035147719 | 0 | N.A. | 0 |
| SESN1     | -0,414631309 | -0,261297393 | 0 | N.A. | 0 |
| LARP7     | -0,414752945 | 0,024281485  | 0 | N.A. | 0 |
| COX7A2L   | -0,415028796 | -0,526451659 | 0 | N.A. | 0 |
| TMEM243   | -0,415708379 | -0,587271815 | 0 | N.A. | 0 |
| KIF20A    | -0,415892655 | -0,278100416 | 0 | N.A. | 0 |
| POLR3H    | -0,415912153 | -0,266124529 | 0 | N.A. | 0 |
| WDR76     | -0,41629645  | -0,308592227 | 0 | N.A. | 0 |
| PGD       | -0,416334549 | -0,448432844 | 0 | N.A. | 0 |
| EED       | -0,416703052 | -0,20573988  | 0 | N.A. | 0 |
| BUB1B     | -0,416877341 | -0,242720684 | 0 | N.A. | 0 |
| C14orf142 | -0,4169821   | -0,38776891  | 0 | N.A. | 0 |
| TYSND1    | -0,417036965 | -0,122343062 | 0 | N.A. | 0 |
| CTU2      | -0,417054462 | -0,225101956 | 0 | N.A. | 0 |
| CTNBL1    | -0,417542349 | -0,220879487 | 0 | N.A. | 0 |
| SPCS2     | -0,417810781 | -0,136368335 | 0 | N.A. | 0 |
| FAM195A   | -0,417815736 | -0,141666071 | 0 | N.A. | 0 |
| DDIAS     | -0,418080238 | -0,100704468 | 0 | N.A. | 0 |
| DLEU2     | -0,41826322  | -0,384353658 | 0 | N.A. | 0 |

|            |              |              |   |      |   |
|------------|--------------|--------------|---|------|---|
| RNF187     | -0,418265278 | 0,241303822  | 0 | N.A. | 0 |
| NQO1       | -0,418448309 | -0,022710656 | 0 | N.A. | 0 |
| PUS7       | -0,418577256 | -0,407776139 | 0 | N.A. | 0 |
| HSPA4      | -0,41859691  | -0,172064907 | 0 | N.A. | 0 |
| REEP4      | -0,419239247 | -0,052339821 | 0 | N.A. | 0 |
| TSEN34     | -0,419345791 | 0,193683195  | 0 | N.A. | 0 |
| EMC8       | -0,419581345 | -0,220407279 | 0 | N.A. | 0 |
| WHSC1      | -0,419592311 | -0,115932524 | 0 | N.A. | 0 |
| AURKAIP1   | -0,419675909 | -0,203919257 | 0 | N.A. | 0 |
| ZCRB1      | -0,419880396 | -0,376439412 | 0 | N.A. | 0 |
| MARC1      | -0,419968231 | -0,220030858 | 0 | N.A. | 0 |
| UFC1       | -0,420004051 | -0,467208424 | 0 | N.A. | 0 |
| DUS3L      | -0,420061747 | -0,344485414 | 0 | N.A. | 0 |
| MCTS1      | -0,420101831 | -0,452189672 | 0 | N.A. | 0 |
| SUCLG2     | -0,420195724 | -0,106767542 | 0 | N.A. | 0 |
| NOX1       | -0,420218788 | -0,212651958 | 0 | N.A. | 0 |
| POLD1      | -0,420845591 | -0,316789602 | 0 | N.A. | 0 |
| WDR75      | -0,42112979  | -0,313916176 | 0 | N.A. | 0 |
| TMEM5      | -0,421240228 | -0,00078713  | 0 | N.A. | 0 |
| CNPY3      | -0,421443669 | -0,309074199 | 0 | N.A. | 0 |
| COPZ1      | -0,421613117 | -0,32220033  | 0 | N.A. | 0 |
| RGS16      | -0,421627992 | -0,083485034 | 0 | N.A. | 0 |
| MCCC2      | -0,421868761 | -0,339743566 | 0 | N.A. | 0 |
| KIF11      | -0,421908476 | -0,375787953 | 0 | N.A. | 0 |
| RP11-111M2 | -0,421926626 | -0,427548703 | 0 | N.A. | 0 |
| LINC01224  | -0,422396612 | -0,139322659 | 0 | N.A. | 0 |
| LTA4H      | -0,42248682  | -0,348359286 | 0 | N.A. | 0 |
| SHCBP1     | -0,422488329 | -0,254017731 | 0 | N.A. | 0 |
| CCNB1IP1   | -0,422523521 | -0,416033276 | 0 | N.A. | 0 |
| RAD54L     | -0,422701531 | -0,291082202 | 0 | N.A. | 0 |
| COX6B1     | -0,42304192  | -0,329312929 | 0 | N.A. | 0 |
| EMP2       | -0,423170936 | 0,122212381  | 0 | N.A. | 0 |
| DLAT       | -0,423337956 | -0,411538611 | 0 | N.A. | 0 |

|           |              |              |   |      |   |
|-----------|--------------|--------------|---|------|---|
| ODF2      | -0,423373964 | -0,370621106 | 0 | N.A. | 0 |
| METTL1    | -0,423490205 | -0,350834754 | 0 | N.A. | 0 |
| CDX2      | -0,423556482 | -0,042671768 | 0 | N.A. | 0 |
| YIF1B     | -0,423602549 | -0,255654334 | 0 | N.A. | 0 |
| NTHL1     | -0,42373864  | 0,366423698  | 0 | N.A. | 0 |
| MTIF2     | -0,423878883 | -0,32856495  | 0 | N.A. | 0 |
| CDCA4     | -0,42413477  | -0,325004061 | 0 | N.A. | 0 |
| USP13     | -0,424313627 | 0,152071349  | 0 | N.A. | 0 |
| COA5      | -0,42435433  | -0,304259263 | 0 | N.A. | 0 |
| TYW3      | -0,424405306 | -0,376918119 | 0 | N.A. | 0 |
| SAFB      | -0,424657244 | -0,164862099 | 0 | N.A. | 0 |
| PRKRA     | -0,424860665 | -0,066106389 | 0 | N.A. | 0 |
| C15orf61  | -0,425357825 | -0,29925017  | 0 | N.A. | 0 |
| DHX29     | -0,425544189 | -0,325685969 | 0 | N.A. | 0 |
| SUV39H2   | -0,42600776  | -0,355245428 | 0 | N.A. | 0 |
| CKAP5     | -0,426179131 | -0,33175502  | 0 | N.A. | 0 |
| IQGAP3    | -0,426192264 | -0,090402094 | 0 | N.A. | 0 |
| NFU1      | -0,426295216 | -0,360099974 | 0 | N.A. | 0 |
| RBM42     | -0,426491453 | -0,204252861 | 0 | N.A. | 0 |
| PWP1      | -0,426792336 | -0,163438704 | 0 | N.A. | 0 |
| SCO1      | -0,426868273 | -0,269841911 | 0 | N.A. | 0 |
| PMS1      | -0,427242782 | -0,151019586 | 0 | N.A. | 0 |
| NOL8      | -0,427369822 | -0,149858276 | 0 | N.A. | 0 |
| KIAA0226L | -0,427485307 | -0,534045082 | 0 | N.A. | 0 |
| ZNF22     | -0,427546152 | -0,198836285 | 0 | N.A. | 0 |
| TBCB      | -0,427781936 | -0,284179258 | 0 | N.A. | 0 |
| RPF1      | -0,427831749 | 0,052279573  | 0 | N.A. | 0 |
| DTL       | -0,427968848 | -0,203989767 | 0 | N.A. | 0 |
| NAT10     | -0,428031939 | -0,257028973 | 0 | N.A. | 0 |
| SLC43A1   | -0,428045053 | -0,312115837 | 0 | N.A. | 0 |
| EXOSC9    | -0,428096464 | -0,232676214 | 0 | N.A. | 0 |
| POLR1D    | -0,428139787 | -0,233693236 | 0 | N.A. | 0 |
| TTC1      | -0,428175175 | -0,18688923  | 0 | N.A. | 0 |

|          |              |              |   |      |   |
|----------|--------------|--------------|---|------|---|
| RNF26    | -0,428382917 | -0,047592282 | 0 | N.A. | 0 |
| PPAT     | -0,428390839 | -0,424652506 | 0 | N.A. | 0 |
| LYSMD2   | -0,428411685 | -0,45111841  | 0 | N.A. | 0 |
| BYSL     | -0,428478292 | -0,229796655 | 0 | N.A. | 0 |
| NRM      | -0,429261513 | -0,21749515  | 0 | N.A. | 0 |
| DDX27    | -0,42947469  | -0,107428686 | 0 | N.A. | 0 |
| UBA2     | -0,429723306 | -0,129854193 | 0 | N.A. | 0 |
| TAF9     | -0,429824457 | -0,54599064  | 0 | N.A. | 0 |
| MYB      | -0,430055429 | -0,269217103 | 0 | N.A. | 0 |
| PGP      | -0,430283839 | -0,165692861 | 0 | N.A. | 0 |
| RNASEH2C | -0,430521819 | -0,323155037 | 0 | N.A. | 0 |
| CHCHD7   | -0,431181703 | -0,324871582 | 0 | N.A. | 0 |
| NSMCE4A  | -0,431366031 | -0,19589047  | 0 | N.A. | 0 |
| TRMT6    | -0,431410749 | -0,121890106 | 0 | N.A. | 0 |
| HADHA    | -0,431553723 | -0,300057855 | 0 | N.A. | 0 |
| NOP14    | -0,432009847 | -0,300504983 | 0 | N.A. | 0 |
| TMEM14C  | -0,432266656 | -0,423194747 | 0 | N.A. | 0 |
| DPAGT1   | -0,432347912 | -0,146793529 | 0 | N.A. | 0 |
| GATB     | -0,43236627  | -0,027115761 | 0 | N.A. | 0 |
| EMD      | -0,432677421 | -0,421790625 | 0 | N.A. | 0 |
| ARRB2    | -0,432755628 | -0,404531443 | 0 | N.A. | 0 |
| PRELID1  | -0,432970942 | -0,283463174 | 0 | N.A. | 0 |
| PABPC4   | -0,432981802 | -0,169766338 | 0 | N.A. | 0 |
| LAP3     | -0,433330757 | -0,392995695 | 0 | N.A. | 0 |
| PMVK     | -0,433502874 | 0,043564659  | 0 | N.A. | 0 |
| UBE2E3   | -0,433663719 | -0,020429123 | 0 | N.A. | 0 |
| FTSJ2    | -0,433784824 | -0,508985371 | 0 | N.A. | 0 |
| TSTA3    | -0,433806663 | 0,006664698  | 0 | N.A. | 0 |
| ARHGEF39 | -0,433899711 | -0,228934039 | 0 | N.A. | 0 |
| CINP     | -0,434118741 | -0,410475124 | 0 | N.A. | 0 |
| GTF3C6   | -0,434170947 | -0,25594399  | 0 | N.A. | 0 |
| RANGRF   | -0,434402181 | -0,291382264 | 0 | N.A. | 0 |
| COX6A1   | -0,434472523 | -0,049386003 | 0 | N.A. | 0 |

|          |              |              |   |      |   |
|----------|--------------|--------------|---|------|---|
| ITGB1BP1 | -0,434525923 | -0,387902898 | 0 | N.A. | 0 |
| SMC3     | -0,434534002 | -0,250245994 | 0 | N.A. | 0 |
| PUS1     | -0,434918713 | -0,233827046 | 0 | N.A. | 0 |
| ETFA     | -0,435710144 | -0,293351554 | 0 | N.A. | 0 |
| GPN1     | -0,435719511 | -0,214631448 | 0 | N.A. | 0 |
| SLC39A8  | -0,435782328 | -0,391517075 | 0 | N.A. | 0 |
| NDUFS4   | -0,435783976 | -0,307255476 | 0 | N.A. | 0 |
| AP1M2    | -0,435805091 | -0,000203715 | 0 | N.A. | 0 |
| GSTO2    | -0,435900606 | -0,348162686 | 0 | N.A. | 0 |
| SFPQ     | -0,436060591 | -0,347726007 | 0 | N.A. | 0 |
| NACA     | -0,436308094 | -0,497402896 | 0 | N.A. | 0 |
| FKBP11   | -0,436314948 | -0,467398504 | 0 | N.A. | 0 |
| SKA1     | -0,436402554 | -0,391279588 | 0 | N.A. | 0 |
| TTK      | -0,436688633 | -0,356000655 | 0 | N.A. | 0 |
| SNUPN    | -0,437011446 | -0,167346767 | 0 | N.A. | 0 |
| TIMM44   | -0,437097501 | -0,111575882 | 0 | N.A. | 0 |
| USP5     | -0,437115635 | -0,076500235 | 0 | N.A. | 0 |
| PTRHD1   | -0,437182134 | -0,438210925 | 0 | N.A. | 0 |
| NDUFA6   | -0,437182998 | -0,276817712 | 0 | N.A. | 0 |
| SMARCA4  | -0,437372546 | 0,195444981  | 0 | N.A. | 0 |
| C1orf35  | -0,437498729 | -0,158784554 | 0 | N.A. | 0 |
| BCAT2    | -0,437599611 | -0,132926778 | 0 | N.A. | 0 |
| ACYP1    | -0,437670663 | 0,035672182  | 0 | N.A. | 0 |
| NDUFA13  | -0,437688587 | -0,249805144 | 0 | N.A. | 0 |
| CCDC85B  | -0,437692464 | -0,426965431 | 0 | N.A. | 0 |
| RAD51    | -0,437866531 | -0,317907727 | 0 | N.A. | 0 |
| ATAD5    | -0,438142296 | -0,247065335 | 0 | N.A. | 0 |
| SHMT2    | -0,438148844 | -0,357074618 | 0 | N.A. | 0 |
| UBE2S    | -0,438296913 | -0,252580451 | 0 | N.A. | 0 |
| TUBA4A   | -0,43842943  | -0,052479362 | 0 | N.A. | 0 |
| TUBA1C   | -0,438599455 | -0,16981024  | 0 | N.A. | 0 |
| BUD31    | -0,4387382   | -0,43343123  | 0 | N.A. | 0 |
| TMEM126A | -0,438787692 | -0,248457877 | 0 | N.A. | 0 |

|          |              |              |   |      |   |
|----------|--------------|--------------|---|------|---|
| TMEM70   | -0,439000812 | -0,256026119 | 0 | N.A. | 0 |
| TRABD2A  | -0,4391816   | -0,089105069 | 0 | N.A. | 0 |
| CHCHD4   | -0,439274193 | -0,422596046 | 0 | N.A. | 0 |
| DHX15    | -0,439393012 | 0,033405379  | 0 | N.A. | 0 |
| MED30    | -0,43950245  | -0,432138944 | 0 | N.A. | 0 |
| TCERG1   | -0,439529805 | -0,168820041 | 0 | N.A. | 0 |
| SSNA1    | -0,43997553  | -0,031608418 | 0 | N.A. | 0 |
| GPS1     | -0,440256332 | 0,155846265  | 0 | N.A. | 0 |
| ANAPC7   | -0,440679884 | -0,172387781 | 0 | N.A. | 0 |
| RNF5     | -0,441697683 | -0,189151143 | 0 | N.A. | 0 |
| TMEM237  | -0,441716042 | -0,260135044 | 0 | N.A. | 0 |
| PSME1    | -0,441920275 | -0,238447597 | 0 | N.A. | 0 |
| NOC3L    | -0,442464161 | -0,106541301 | 0 | N.A. | 0 |
| ECI2     | -0,442617812 | -0,208612649 | 0 | N.A. | 0 |
| DPCD     | -0,442627731 | -0,310052969 | 0 | N.A. | 0 |
| GNB2L1   | -0,443424584 | -0,565404051 | 0 | N.A. | 0 |
| THUMPD3  | -0,443428442 | -0,427632079 | 0 | N.A. | 0 |
| TSN      | -0,443664506 | -0,24162892  | 0 | N.A. | 0 |
| CEBPZ    | -0,443761719 | 0,079803199  | 0 | N.A. | 0 |
| CDC25C   | -0,443881906 | -0,232068941 | 0 | N.A. | 0 |
| EPHB3    | -0,444469632 | -0,163868041 | 0 | N.A. | 0 |
| PSMD12   | -0,444506687 | -0,065506896 | 0 | N.A. | 0 |
| HIRIP3   | -0,444630971 | -0,148777728 | 0 | N.A. | 0 |
| LYPLA1   | -0,44476186  | -0,401079406 | 0 | N.A. | 0 |
| APOO     | -0,445341211 | -0,243240055 | 0 | N.A. | 0 |
| PPP1R7   | -0,445697085 | -0,037769803 | 0 | N.A. | 0 |
| SUMO2    | -0,445866769 | -0,259866996 | 0 | N.A. | 0 |
| KIF15    | -0,446116425 | -0,327706489 | 0 | N.A. | 0 |
| EIF3D    | -0,446160301 | -0,434001953 | 0 | N.A. | 0 |
| KIF2C    | -0,446450017 | -0,271975839 | 0 | N.A. | 0 |
| GINS3    | -0,44672852  | -0,385505685 | 0 | N.A. | 0 |
| CDK5RAP1 | -0,446731848 | -0,401765007 | 0 | N.A. | 0 |
| CHTF18   | -0,447114689 | -0,262353455 | 0 | N.A. | 0 |

|         |              |              |   |      |   |
|---------|--------------|--------------|---|------|---|
| PIR     | -0,447355166 | -0,463984273 | 0 | N.A. | 0 |
| CHAC2   | -0,447592911 | -0,268741907 | 0 | N.A. | 0 |
| COPS4   | -0,447748128 | -0,234178597 | 0 | N.A. | 0 |
| EMG1    | -0,447762154 | -0,204138164 | 0 | N.A. | 0 |
| EIF3L   | -0,44779888  | -0,583785916 | 0 | N.A. | 0 |
| GCDH    | -0,447898524 | -0,484802136 | 0 | N.A. | 0 |
| FANCB   | -0,448109006 | -0,213922381 | 0 | N.A. | 0 |
| NAA50   | -0,448135882 | -0,313784954 | 0 | N.A. | 0 |
| TEX30   | -0,448398476 | -0,468335099 | 0 | N.A. | 0 |
| NSL1    | -0,448420956 | -0,376889581 | 0 | N.A. | 0 |
| EIF3E   | -0,448479794 | -0,537032669 | 0 | N.A. | 0 |
| HDAC3   | -0,448627206 | -0,164758534 | 0 | N.A. | 0 |
| UCK2    | -0,448742873 | -0,249919767 | 0 | N.A. | 0 |
| ESCO2   | -0,448758591 | -0,395428471 | 0 | N.A. | 0 |
| ISOC1   | -0,448850017 | -0,322736207 | 0 | N.A. | 0 |
| APMAP   | -0,448877427 | -0,064646247 | 0 | N.A. | 0 |
| NIF3L1  | -0,448904731 | -0,271323918 | 0 | N.A. | 0 |
| PPA1    | -0,44915664  | -0,251394392 | 0 | N.A. | 0 |
| EBP     | -0,449263392 | 0,14248364   | 0 | N.A. | 0 |
| ARL5A   | -0,449263884 | -0,558481305 | 0 | N.A. | 0 |
| DCPS    | -0,449328865 | -0,259623934 | 0 | N.A. | 0 |
| GOLIM4  | -0,44937279  | -0,144548293 | 0 | N.A. | 0 |
| TEFM    | -0,449557078 | 0,070325625  | 0 | N.A. | 0 |
| COMT    | -0,449644538 | 0,039002322  | 0 | N.A. | 0 |
| RHOBTB3 | -0,450188959 | -0,100754036 | 0 | N.A. | 0 |
| PSRC1   | -0,450448174 | -0,371328755 | 0 | N.A. | 0 |
| FAM111B | -0,450475532 | -0,31510781  | 0 | N.A. | 0 |
| ZNF367  | -0,451596981 | -0,319619632 | 0 | N.A. | 0 |
| SF3B3   | -0,451737185 | 0,067750562  | 0 | N.A. | 0 |
| ZC3H8   | -0,451755951 | -0,157124731 | 0 | N.A. | 0 |
| SUMO3   | -0,452004361 | -0,335491234 | 0 | N.A. | 0 |
| NUP85   | -0,452563706 | -0,139417523 | 0 | N.A. | 0 |
| PNPT1   | -0,452986314 | -0,191513533 | 0 | N.A. | 0 |



|          |              |              |   |      |   |
|----------|--------------|--------------|---|------|---|
| QRSL1    | -0,453099647 | -0,45351858  | 0 | N.A. | 0 |
| ASPM     | -0,453216314 | -0,227046889 | 0 | N.A. | 0 |
| UBA5     | -0,453372058 | -0,254587057 | 0 | N.A. | 0 |
| FIP1L1   | -0,453394387 | 0,127811666  | 0 | N.A. | 0 |
| MORN2    | -0,453568366 | -0,320429639 | 0 | N.A. | 0 |
| C12orf10 | -0,453657369 | -0,292013928 | 0 | N.A. | 0 |
| HNRNPUL1 | -0,453694214 | -0,266842682 | 0 | N.A. | 0 |
| NUP210   | -0,454078268 | -0,054713036 | 0 | N.A. | 0 |
| RSRC1    | -0,454239577 | -0,334212675 | 0 | N.A. | 0 |
| DNPEP    | -0,454413749 | 0,029538139  | 0 | N.A. | 0 |
| GYG1     | -0,454422474 | -0,284049742 | 0 | N.A. | 0 |
| PPP1R1B  | -0,454757515 | -0,265433399 | 0 | N.A. | 0 |
| TPI1     | -0,454810997 | -0,302596011 | 0 | N.A. | 0 |
| KHK      | -0,454832206 | -0,05808086  | 0 | N.A. | 0 |
| USP39    | -0,454970214 | -0,347432796 | 0 | N.A. | 0 |
| C1orf123 | -0,455289705 | -0,420714503 | 0 | N.A. | 0 |
| TSR2     | -0,455633775 | -0,440186336 | 0 | N.A. | 0 |
| METTL2A  | -0,455692876 | -0,397535497 | 0 | N.A. | 0 |
| GPAA1    | -0,455704259 | -0,161719854 | 0 | N.A. | 0 |
| AUNIP    | -0,455939145 | -0,438332652 | 0 | N.A. | 0 |
| AASDHPPT | -0,456137172 | -0,405472314 | 0 | N.A. | 0 |
| SRRM1    | -0,456508025 | 0,059027012  | 0 | N.A. | 0 |
| TIMM17A  | -0,456649041 | -0,201263998 | 0 | N.A. | 0 |
| UBE2L3   | -0,456875419 | -0,359265927 | 0 | N.A. | 0 |
| MTX2     | -0,457315239 | -0,319594282 | 0 | N.A. | 0 |
| MSH6     | -0,457358616 | -0,250999891 | 0 | N.A. | 0 |
| UBA52    | -0,457378973 | -0,517388118 | 0 | N.A. | 0 |
| DDC      | -0,457390156 | -0,229608462 | 0 | N.A. | 0 |
| MIPEP    | -0,457402772 | -0,283334363 | 0 | N.A. | 0 |
| JTB      | -0,457759788 | -0,295502751 | 0 | N.A. | 0 |
| DDX49    | -0,457873881 | -0,376226907 | 0 | N.A. | 0 |
| RTF1     | -0,458252469 | -0,178772828 | 0 | N.A. | 0 |
| QARS     | -0,458537811 | -0,340277038 | 0 | N.A. | 0 |

|         |              |              |   |      |   |
|---------|--------------|--------------|---|------|---|
| NCAPD3  | -0,458628066 | -0,283548297 | 0 | N.A. | 0 |
| AKIP1   | -0,459034357 | -0,155758341 | 0 | N.A. | 0 |
| TMEM258 | -0,459176157 | -0,388955195 | 0 | N.A. | 0 |
| BRCA2   | -0,459295139 | -0,16845711  | 0 | N.A. | 0 |
| ATP5E   | -0,459340258 | -0,340679556 | 0 | N.A. | 0 |
| NOL10   | -0,459406732 | -0,275466388 | 0 | N.A. | 0 |
| DIMT1   | -0,459426131 | -0,554273894 | 0 | N.A. | 0 |
| MRRF    | -0,459480163 | -0,095310088 | 0 | N.A. | 0 |
| PINX1   | -0,459490888 | -0,429754929 | 0 | N.A. | 0 |
| EIF2D   | -0,459592332 | -0,362449865 | 0 | N.A. | 0 |
| EIF3H   | -0,459813243 | -0,468782899 | 0 | N.A. | 0 |
| RWDD1   | -0,460145946 | -0,465480394 | 0 | N.A. | 0 |
| PFDN2   | -0,460737966 | -0,194319793 | 0 | N.A. | 0 |
| RPA1    | -0,460963952 | -0,382225475 | 0 | N.A. | 0 |
| PRMT3   | -0,46101615  | -0,237933225 | 0 | N.A. | 0 |
| SLC37A4 | -0,46103375  | -0,160383866 | 0 | N.A. | 0 |
| NMRAL1  | -0,46105879  | 0,075033098  | 0 | N.A. | 0 |
| PPP1CA  | -0,461264804 | -0,234418501 | 0 | N.A. | 0 |
| UTP11L  | -0,461369797 | -0,515481894 | 0 | N.A. | 0 |
| PTRH2   | -0,461471489 | -0,284833404 | 0 | N.A. | 0 |
| CUEDC2  | -0,461715235 | -0,583114638 | 0 | N.A. | 0 |
| HJURP   | -0,46172705  | -0,213950941 | 0 | N.A. | 0 |
| IVD     | -0,461738352 | -0,344931494 | 0 | N.A. | 0 |
| RPE     | -0,462126186 | -0,555029337 | 0 | N.A. | 0 |
| SPAG5   | -0,46216859  | -0,326432426 | 0 | N.A. | 0 |
| ELP6    | -0,462420248 | -0,472101159 | 0 | N.A. | 0 |
| POLE2   | -0,462587791 | -0,38102172  | 0 | N.A. | 0 |
| TIMMDC1 | -0,462686716 | -0,189872065 | 0 | N.A. | 0 |
| CPSF4   | -0,462714677 | -0,360026298 | 0 | N.A. | 0 |
| CDCA8   | -0,463088924 | -0,391594446 | 0 | N.A. | 0 |
| SMIM20  | -0,463291608 | -0,317845761 | 0 | N.A. | 0 |
| DHX9    | -0,463433876 | -0,144793506 | 0 | N.A. | 0 |
| RAD23A  | -0,463440091 | -0,356710459 | 0 | N.A. | 0 |

|           |              |              |   |      |   |
|-----------|--------------|--------------|---|------|---|
| CWC27     | -0,4637461   | -0,21568495  | 0 | N.A. | 0 |
| MPHOSPH10 | -0,463899818 | -0,239563255 | 0 | N.A. | 0 |
| BRMS1     | -0,464449346 | -0,272470998 | 0 | N.A. | 0 |
| STX10     | -0,464505824 | -0,052894982 | 0 | N.A. | 0 |
| FAM105A   | -0,464707766 | -0,150393205 | 0 | N.A. | 0 |
| ALKBH2    | -0,465197756 | -0,359672244 | 0 | N.A. | 0 |
| NCAPD2    | -0,465374907 | -0,251888891 | 0 | N.A. | 0 |
| ODC1      | -0,465385217 | -0,496871191 | 0 | N.A. | 0 |
| PARVB     | -0,46550751  | -0,371287122 | 0 | N.A. | 0 |
| FBXW9     | -0,465570473 | -0,267379246 | 0 | N.A. | 0 |
| CARS2     | -0,465573445 | -0,102732436 | 0 | N.A. | 0 |
| NAP1L4    | -0,465679415 | -0,095523677 | 0 | N.A. | 0 |
| COX5B     | -0,465679831 | -0,283907647 | 0 | N.A. | 0 |
| TDGF1     | -0,466294421 | -0,453523104 | 0 | N.A. | 0 |
| OARD1     | -0,466348027 | -0,327800137 | 0 | N.A. | 0 |
| CCDC25    | -0,466364425 | -0,274429767 | 0 | N.A. | 0 |
| AP1S1     | -0,466572921 | -0,185358064 | 0 | N.A. | 0 |
| HES1      | -0,466724191 | 0,000341786  | 0 | N.A. | 0 |
| HSDL2     | -0,466757495 | -0,385439316 | 0 | N.A. | 0 |
| PPHLN1    | -0,466985959 | -0,337133453 | 0 | N.A. | 0 |
| CLTA      | -0,467224189 | -0,261803082 | 0 | N.A. | 0 |
| MTX1      | -0,467244626 | -0,401301864 | 0 | N.A. | 0 |
| WDR4      | -0,467420657 | -0,153252439 | 0 | N.A. | 0 |
| CRLS1     | -0,467556331 | -0,232677247 | 0 | N.A. | 0 |
| LYRM7     | -0,467750479 | -0,214103344 | 0 | N.A. | 0 |
| TM7SF3    | -0,467858294 | -0,264262123 | 0 | N.A. | 0 |
| ARL3      | -0,467859878 | -0,232112054 | 0 | N.A. | 0 |
| SEPT2     | -0,467914707 | -0,29168911  | 0 | N.A. | 0 |
| NCAPH     | -0,468184433 | -0,302124859 | 0 | N.A. | 0 |
| MLF2      | -0,46832918  | -0,373486497 | 0 | N.A. | 0 |
| POLR2C    | -0,468377313 | -0,007032208 | 0 | N.A. | 0 |
| U2AF2     | -0,468532503 | 0,042469171  | 0 | N.A. | 0 |
| EIF3J     | -0,468584687 | -0,321698609 | 0 | N.A. | 0 |

|         |              |              |   |      |   |
|---------|--------------|--------------|---|------|---|
| REXO4   | -0,468594258 | -0,265391428 | 0 | N.A. | 0 |
| QDPR    | -0,468844687 | -0,47382863  | 0 | N.A. | 0 |
| TPGS2   | -0,468921004 | -0,454958601 | 0 | N.A. | 0 |
| KRR1    | -0,469035253 | -0,235970814 | 0 | N.A. | 0 |
| CCNC    | -0,469105464 | -0,260158386 | 0 | N.A. | 0 |
| PIGF    | -0,46921046  | 0,234770299  | 0 | N.A. | 0 |
| NT5DC2  | -0,469410238 | -0,097230743 | 0 | N.A. | 0 |
| UMPS    | -0,469632978 | -0,103992149 | 0 | N.A. | 0 |
| NOC2L   | -0,469809683 | -0,215264767 | 0 | N.A. | 0 |
| DNAJA2  | -0,469817346 | 0,015002787  | 0 | N.A. | 0 |
| F12     | -0,470196113 | 0,090154766  | 0 | N.A. | 0 |
| ASF1A   | -0,470330966 | -0,327540993 | 0 | N.A. | 0 |
| EXOSC2  | -0,47036197  | -0,325175315 | 0 | N.A. | 0 |
| BRD7    | -0,470609908 | 0,024497553  | 0 | N.A. | 0 |
| AURKA   | -0,470879097 | -0,406437142 | 0 | N.A. | 0 |
| KIF23   | -0,471068757 | -0,335821258 | 0 | N.A. | 0 |
| RABGGTB | -0,471293462 | -0,377017451 | 0 | N.A. | 0 |
| VDAC1   | -0,471585136 | -0,297949445 | 0 | N.A. | 0 |
| DDX55   | -0,471937477 | -0,051369538 | 0 | N.A. | 0 |
| TIMM17B | -0,472215459 | 0,079823389  | 0 | N.A. | 0 |
| NANS    | -0,472266396 | -0,14051971  | 0 | N.A. | 0 |
| GHITM   | -0,472680689 | -0,204247267 | 0 | N.A. | 0 |
| ERAL1   | -0,473251377 | -0,288073987 | 0 | N.A. | 0 |
| GINS1   | -0,47334568  | -0,201504429 | 0 | N.A. | 0 |
| YEATS4  | -0,473550592 | -0,376858156 | 0 | N.A. | 0 |
| SMARCD2 | -0,473704468 | -0,001474487 | 0 | N.A. | 0 |
| ATP5G2  | -0,47389774  | -0,458696591 | 0 | N.A. | 0 |
| POP4    | -0,473955541 | -0,132943274 | 0 | N.A. | 0 |
| NUP35   | -0,474136833 | -0,258149336 | 0 | N.A. | 0 |
| PRPF38B | -0,474351342 | -0,001221347 | 0 | N.A. | 0 |
| GTF2H3  | -0,474448894 | -0,298202142 | 0 | N.A. | 0 |
| DLEU1   | -0,474488336 | -0,562612656 | 0 | N.A. | 0 |
| NDUFAF6 | -0,474862731 | -0,399770292 | 0 | N.A. | 0 |

|            |              |              |   |      |   |
|------------|--------------|--------------|---|------|---|
| ESF1       | -0,475126406 | -0,027568484 | 0 | N.A. | 0 |
| MCM10      | -0,475270135 | -0,295154815 | 0 | N.A. | 0 |
| SS18L2     | -0,475277298 | -0,354524422 | 0 | N.A. | 0 |
| LRR1       | -0,47542732  | -0,469149364 | 0 | N.A. | 0 |
| ALG8       | -0,476089956 | -0,13565657  | 0 | N.A. | 0 |
| CETN3      | -0,476207102 | -0,449048964 | 0 | N.A. | 0 |
| SF3B6      | -0,476341593 | -0,409441599 | 0 | N.A. | 0 |
| POLR3G     | -0,476626575 | -0,338008448 | 0 | N.A. | 0 |
| PDCD2L     | -0,476809894 | -0,308752801 | 0 | N.A. | 0 |
| NUFIP1     | -0,476828653 | -0,267794595 | 0 | N.A. | 0 |
| ABCF2      | -0,476836265 | -0,397061365 | 0 | N.A. | 0 |
| TCTEX1D2   | -0,476849767 | -0,444304559 | 0 | N.A. | 0 |
| RAD21      | -0,476993771 | -0,203666321 | 0 | N.A. | 0 |
| SMIM4      | -0,477697158 | -0,607198631 | 0 | N.A. | 0 |
| CDC45      | -0,477809822 | -0,395659302 | 0 | N.A. | 0 |
| HPDL       | -0,477930047 | -0,228245124 | 0 | N.A. | 0 |
| SASS6      | -0,478111276 | -0,183337126 | 0 | N.A. | 0 |
| NUPL2      | -0,478346932 | -0,361469386 | 0 | N.A. | 0 |
| PKMYT1     | -0,478614881 | -0,27653584  | 0 | N.A. | 0 |
| CDKN2AIPNL | -0,478662806 | -0,500832303 | 0 | N.A. | 0 |
| ARV1       | -0,478807626 | -0,121088159 | 0 | N.A. | 0 |
| BRCA1      | -0,478963072 | 0,049081438  | 0 | N.A. | 0 |
| RBM8A      | -0,479051231 | -0,352002088 | 0 | N.A. | 0 |
| NFS1       | -0,479223463 | -0,523140202 | 0 | N.A. | 0 |
| WDR5       | -0,479332831 | -0,248491354 | 0 | N.A. | 0 |
| ST13       | -0,479361537 | -0,500806503 | 0 | N.A. | 0 |
| OSGEP      | -0,479622736 | -0,190016216 | 0 | N.A. | 0 |
| COQ4       | -0,479653848 | -0,22662107  | 0 | N.A. | 0 |
| SLC27A5    | -0,479764621 | -0,416672965 | 0 | N.A. | 0 |
| CLN6       | -0,479799158 | 0,012587346  | 0 | N.A. | 0 |
| KIFC1      | -0,479799506 | -0,414240631 | 0 | N.A. | 0 |
| NCBP2-AS2  | -0,479847787 | -0,02043099  | 0 | N.A. | 0 |
| UQCC3      | -0,480106985 | -0,005204889 | 0 | N.A. | 0 |

|          |              |              |   |      |   |
|----------|--------------|--------------|---|------|---|
| PMPCB    | -0,480542379 | -0,277373739 | 0 | N.A. | 0 |
| EIF4A3   | -0,480639443 | -0,236216791 | 0 | N.A. | 0 |
| PDRG1    | -0,480707521 | -0,34467189  | 0 | N.A. | 0 |
| TATDN1   | -0,480720198 | -0,385751028 | 0 | N.A. | 0 |
| CDK1     | -0,48088552  | -0,398669705 | 0 | N.A. | 0 |
| SNHG10   | -0,481298479 | -0,037180574 | 0 | N.A. | 0 |
| DEPDC1   | -0,481468018 | -0,373633736 | 0 | N.A. | 0 |
| IMPDH1   | -0,482649106 | -0,252253303 | 0 | N.A. | 0 |
| KIAA1524 | -0,482717241 | -0,398804799 | 0 | N.A. | 0 |
| MRS2     | -0,482905761 | -0,301454198 | 0 | N.A. | 0 |
| ADCK3    | -0,483226477 | -0,209080321 | 0 | N.A. | 0 |
| YWHAB    | -0,483229788 | -0,154444184 | 0 | N.A. | 0 |
| TFB1M    | -0,483318255 | -0,182694802 | 0 | N.A. | 0 |
| pk       | -0,483498445 | -0,354268242 | 0 | N.A. | 0 |
| TXNL4A   | -0,483559308 | -0,012427573 | 0 | N.A. | 0 |
| FBXO22   | -0,483679271 | -0,404762233 | 0 | N.A. | 0 |
| WDR34    | -0,483690597 | -0,048127013 | 0 | N.A. | 0 |
| UBE2V2   | -0,484647609 | -0,480308922 | 0 | N.A. | 0 |
| UXT      | -0,485087109 | -0,540965074 | 0 | N.A. | 0 |
| KNSTRN   | -0,485215458 | -0,47008035  | 0 | N.A. | 0 |
| DARS     | -0,485500013 | -0,221531869 | 0 | N.A. | 0 |
| APIP     | -0,485734087 | -0,530373089 | 0 | N.A. | 0 |
| CDC26    | -0,485840406 | -0,169272183 | 0 | N.A. | 0 |
| LLPH     | -0,485986633 | -0,230764352 | 0 | N.A. | 0 |
| NDC1     | -0,48600044  | -0,304935891 | 0 | N.A. | 0 |
| CAPRIN1  | -0,486045404 | -0,287359454 | 0 | N.A. | 0 |
| HNRNPA0  | -0,486049175 | -0,557308524 | 0 | N.A. | 0 |
| PPT1     | -0,486131712 | -0,015056706 | 0 | N.A. | 0 |
| NDUFB4   | -0,48622682  | -0,179720621 | 0 | N.A. | 0 |
| GART     | -0,486353154 | -0,378412561 | 0 | N.A. | 0 |
| KIF4A    | -0,486675533 | -0,324951701 | 0 | N.A. | 0 |
| URM1     | -0,486760849 | -0,160207507 | 0 | N.A. | 0 |
| HENMT1   | -0,486997838 | -0,481112781 | 0 | N.A. | 0 |

|           |              |              |   |      |   |
|-----------|--------------|--------------|---|------|---|
| MYEOV2    | -0,487040345 | -0,414528459 | 0 | N.A. | 0 |
| ECT2      | -0,48730621  | -0,143113942 | 0 | N.A. | 0 |
| IARS2     | -0,487421694 | 0,169039661  | 0 | N.A. | 0 |
| WDR12     | -0,487575709 | -0,350875915 | 0 | N.A. | 0 |
| ARHGAP11A | -0,488303124 | -0,342105837 | 0 | N.A. | 0 |
| DIAPH3    | -0,48854286  | -0,377484367 | 0 | N.A. | 0 |
| HACL1     | -0,488717042 | -0,42847465  | 0 | N.A. | 0 |
| DDT       | -0,488963912 | -0,312393185 | 0 | N.A. | 0 |
| CHAF1A    | -0,48902735  | -0,093758787 | 0 | N.A. | 0 |
| BUB1      | -0,489166108 | -0,33551227  | 0 | N.A. | 0 |
| C7orf55   | -0,489362828 | -0,392832324 | 0 | N.A. | 0 |
| DSN1      | -0,489561205 | -0,177940594 | 0 | N.A. | 0 |
| HGH1      | -0,489572193 | -0,35164033  | 0 | N.A. | 0 |
| NDUFB5    | -0,489900445 | -0,372894054 | 0 | N.A. | 0 |
| UBXN4     | -0,49026453  | 0,098752409  | 0 | N.A. | 0 |
| TACC3     | -0,490421597 | -0,335369745 | 0 | N.A. | 0 |
| BCLAF1    | -0,490714955 | -0,154661034 | 0 | N.A. | 0 |
| NDUFA1    | -0,491028734 | -0,410639263 | 0 | N.A. | 0 |
| PMPCA     | -0,491146324 | -0,175077403 | 0 | N.A. | 0 |
| ALYREF    | -0,491264643 | -0,102320142 | 0 | N.A. | 0 |
| DARS2     | -0,49159326  | -0,103057411 | 0 | N.A. | 0 |
| ACOT7     | -0,491886909 | -0,098112498 | 0 | N.A. | 0 |
| SSR2      | -0,492247668 | -0,3267787   | 0 | N.A. | 0 |
| FOXP4-AS1 | -0,492460022 | -0,517340393 | 0 | N.A. | 0 |
| PDIA6     | -0,492500091 | 0,007771181  | 0 | N.A. | 0 |
| SUGT1     | -0,492519795 | -0,217322697 | 0 | N.A. | 0 |
| RPP30     | -0,492910238 | -0,416574327 | 0 | N.A. | 0 |
| LMNB2     | -0,492959517 | -0,250448589 | 0 | N.A. | 0 |
| PTPMT1    | -0,493025592 | -0,289149458 | 0 | N.A. | 0 |
| TIMELESS  | -0,493395668 | -0,352786193 | 0 | N.A. | 0 |
| TCEAL4    | -0,493646858 | -0,47187105  | 0 | N.A. | 0 |
| MPV17L2   | -0,493674799 | -0,057571008 | 0 | N.A. | 0 |
| CENPP     | -0,494027833 | -0,389749244 | 0 | N.A. | 0 |

|          |              |              |   |      |   |
|----------|--------------|--------------|---|------|---|
| E2F1     | -0,49404464  | -0,250429938 | 0 | N.A. | 0 |
| GMDS     | -0,494943148 | -0,251994548 | 0 | N.A. | 0 |
| PFDN4    | -0,494993339 | -0,445196717 | 0 | N.A. | 0 |
| ICT1     | -0,495144817 | -0,273868383 | 0 | N.A. | 0 |
| CCDC59   | -0,495313893 | -0,064533076 | 0 | N.A. | 0 |
| RBM25    | -0,495314185 | 0,246921786  | 0 | N.A. | 0 |
| FAM104B  | -0,4959078   | -0,433276704 | 0 | N.A. | 0 |
| NUP93    | -0,495974281 | -0,450492811 | 0 | N.A. | 0 |
| NEK2     | -0,496352925 | -0,332224218 | 0 | N.A. | 0 |
| UCHL5    | -0,496407008 | -0,51736257  | 0 | N.A. | 0 |
| IMP3     | -0,496447534 | -0,067682259 | 0 | N.A. | 0 |
| BCL2L12  | -0,496675529 | -0,276033252 | 0 | N.A. | 0 |
| DDOST    | -0,497214753 | -0,152287411 | 0 | N.A. | 0 |
| ARMC6    | -0,497217367 | -0,091559162 | 0 | N.A. | 0 |
| CNN3     | -0,497399861 | -0,459163252 | 0 | N.A. | 0 |
| HTATSF1  | -0,497447955 | -0,059062891 | 0 | N.A. | 0 |
| DDX21    | -0,497592971 | -0,090933503 | 0 | N.A. | 0 |
| FKBP4    | -0,49767179  | -0,281534049 | 0 | N.A. | 0 |
| LAMTOR2  | -0,497779702 | -0,21883515  | 0 | N.A. | 0 |
| MELK     | -0,497794565 | -0,324606948 | 0 | N.A. | 0 |
| C16orf59 | -0,498172353 | -0,275817519 | 0 | N.A. | 0 |
| SUMO1    | -0,498200761 | -0,450863045 | 0 | N.A. | 0 |
| E2F4     | -0,499013826 | 0,001252715  | 0 | N.A. | 0 |
| NAA15    | -0,49931842  | -0,080110591 | 0 | N.A. | 0 |
| PYCR2    | -0,499321897 | -0,11436949  | 0 | N.A. | 0 |
| WDR43    | -0,49944479  | -0,22565387  | 0 | N.A. | 0 |
| WDR18    | -0,499638346 | -0,235336666 | 0 | N.A. | 0 |
| PIH1D1   | -0,499741282 | -0,27551764  | 0 | N.A. | 0 |
| CCAR1    | -0,499778388 | -0,092113575 | 0 | N.A. | 0 |
| GNL2     | -0,499786304 | -0,402950491 | 0 | N.A. | 0 |
| DECR1    | -0,499979267 | -0,471985091 | 0 | N.A. | 0 |
| CLSPN    | -0,500174448 | -0,356550348 | 0 | N.A. | 0 |
| CMC1     | -0,500252529 | -0,281651907 | 0 | N.A. | 0 |



|          |              |              |   |      |   |
|----------|--------------|--------------|---|------|---|
| N6AMT2   | -0,500485724 | -0,129019631 | 0 | N.A. | 0 |
| ASUN     | -0,500648878 | -0,12872671  | 0 | N.A. | 0 |
| CENPA    | -0,500680299 | -0,434983693 | 0 | N.A. | 0 |
| STARD7   | -0,500792875 | -0,251048406 | 0 | N.A. | 0 |
| ADRM1    | -0,500881953 | -0,18933095  | 0 | N.A. | 0 |
| CDC5L    | -0,501001105 | -0,269875706 | 0 | N.A. | 0 |
| DNAJC7   | -0,501335188 | -0,135992341 | 0 | N.A. | 0 |
| TRA2B    | -0,501348887 | -0,332545464 | 0 | N.A. | 0 |
| HIST1H4C | -0,501462658 | -0,510237832 | 0 | N.A. | 0 |
| THRAP3   | -0,501883579 | -0,031911977 | 0 | N.A. | 0 |
| NUDT21   | -0,501923804 | -0,418315527 | 0 | N.A. | 0 |
| BAZ1B    | -0,502125749 | -0,169560239 | 0 | N.A. | 0 |
| PRR11    | -0,502205455 | -0,363978927 | 0 | N.A. | 0 |
| RACGAP1  | -0,502350665 | -0,400459596 | 0 | N.A. | 0 |
| CPSF6    | -0,502490319 | -0,389535933 | 0 | N.A. | 0 |
| G3BP1    | -0,502830973 | -0,190504223 | 0 | N.A. | 0 |
| APOA1BP  | -0,503076956 | -0,139069513 | 0 | N.A. | 0 |
| PSMC3    | -0,503572673 | -0,453109732 | 0 | N.A. | 0 |
| PHF14    | -0,503734656 | 0,054945858  | 0 | N.A. | 0 |
| FAM83D   | -0,503995922 | -0,351667593 | 0 | N.A. | 0 |
| WBSCR16  | -0,504356493 | -0,106205222 | 0 | N.A. | 0 |
| GTPBP4   | -0,504596016 | -0,274972351 | 0 | N.A. | 0 |
| PSMD1    | -0,504654709 | 0,078736826  | 0 | N.A. | 0 |
| AAMP     | -0,504721442 | -0,095715253 | 0 | N.A. | 0 |
| EMC9     | -0,504923964 | -0,393259479 | 0 | N.A. | 0 |
| RPF2     | -0,504981512 | -0,356044956 | 0 | N.A. | 0 |
| CENPV    | -0,504995922 | 0,220847101  | 0 | N.A. | 0 |
| ENO1     | -0,505045695 | -0,36616126  | 0 | N.A. | 0 |
| SLC25A11 | -0,505664081 | -0,182318585 | 0 | N.A. | 0 |
| SEC11A   | -0,505681201 | -0,383372835 | 0 | N.A. | 0 |
| NCAPG    | -0,505703375 | -0,334084048 | 0 | N.A. | 0 |
| RNPS1    | -0,505778602 | -0,232492063 | 0 | N.A. | 0 |
| MAPK13   | -0,505959855 | -0,219610643 | 0 | N.A. | 0 |

|             |              |              |   |      |   |
|-------------|--------------|--------------|---|------|---|
| TMEM126B    | -0,50598124  | -0,27682972  | 0 | N.A. | 0 |
| DLGAP5      | -0,506029802 | -0,317144407 | 0 | N.A. | 0 |
| ALG5        | -0,506168317 | 0,025617853  | 0 | N.A. | 0 |
| ALDH2       | -0,50618307  | -0,199481186 | 0 | N.A. | 0 |
| PSMD7       | -0,506487605 | -0,0385167   | 0 | N.A. | 0 |
| GTSE1       | -0,507024836 | -0,343780698 | 0 | N.A. | 0 |
| BABAM1      | -0,507176039 | -0,331399935 | 0 | N.A. | 0 |
| PRTFDC1     | -0,507272107 | -0,537072214 | 0 | N.A. | 0 |
| HARS        | -0,507333707 | -0,431343587 | 0 | N.A. | 0 |
| CNPY2       | -0,50764082  | -0,060302456 | 0 | N.A. | 0 |
| ETFB        | -0,507714138 | -0,164412113 | 0 | N.A. | 0 |
| NIP7        | -0,507740988 | -0,456991168 | 0 | N.A. | 0 |
| PFKM        | -0,50821738  | -0,330760924 | 0 | N.A. | 0 |
| GTF2A2      | -0,508246566 | -0,243984053 | 0 | N.A. | 0 |
| SRP14       | -0,508371195 | -0,274728657 | 0 | N.A. | 0 |
| SMARCE1     | -0,508420653 | -0,349945081 | 0 | N.A. | 0 |
| CSTF3       | -0,508432004 | -0,221454365 | 0 | N.A. | 0 |
| WDR46       | -0,508564962 | -0,289616392 | 0 | N.A. | 0 |
| SNX17       | -0,508645535 | -0,30781931  | 0 | N.A. | 0 |
| USP1        | -0,508662691 | -0,288852866 | 0 | N.A. | 0 |
| ABHD14B     | -0,508727188 | -0,342021838 | 0 | N.A. | 0 |
| UHRF1       | -0,508870254 | -0,370405539 | 0 | N.A. | 0 |
| UPF3A       | -0,509759641 | -0,165709397 | 0 | N.A. | 0 |
| C7orf55-LUC | -0,51005428  | -0,198004467 | 0 | N.A. | 0 |
| UQCRCQ      | -0,510846459 | -0,453269224 | 0 | N.A. | 0 |
| ELFN1-AS1   | -0,510919528 | -0,442102366 | 0 | N.A. | 0 |
| SPDL1       | -0,511015167 | -0,276202341 | 0 | N.A. | 0 |
| RBM28       | -0,511161113 | -0,079880732 | 0 | N.A. | 0 |
| RP11-1094M  | -0,511286608 | -0,371780457 | 0 | N.A. | 0 |
| KIAA0020    | -0,511637121 | -0,22611107  | 0 | N.A. | 0 |
| EIF2B3      | -0,511659494 | -0,126561955 | 0 | N.A. | 0 |
| SPC24       | -0,511678867 | -0,426711419 | 0 | N.A. | 0 |
| ECHDC1      | -0,511793584 | -0,54782397  | 0 | N.A. | 0 |

|          |              |              |   |      |   |
|----------|--------------|--------------|---|------|---|
| MZT2B    | -0,511812823 | -0,20366131  | 0 | N.A. | 0 |
| PDCL3    | -0,511860734 | -0,485577673 | 0 | N.A. | 0 |
| PSMD8    | -0,511893843 | -0,380895014 | 0 | N.A. | 0 |
| NCAPG2   | -0,511896924 | -0,30748664  | 0 | N.A. | 0 |
| MTERF3   | -0,511963552 | -0,160941476 | 0 | N.A. | 0 |
| BCL7C    | -0,512007542 | -0,251247899 | 0 | N.A. | 0 |
| NARS2    | -0,512196552 | -0,512184245 | 0 | N.A. | 0 |
| PCCB     | -0,512276728 | -0,326829714 | 0 | N.A. | 0 |
| CENPM    | -0,512361432 | -0,308369029 | 0 | N.A. | 0 |
| DEPDC1B  | -0,512634573 | -0,449265588 | 0 | N.A. | 0 |
| SUPT16H  | -0,512660838 | -0,131004483 | 0 | N.A. | 0 |
| ECH1     | -0,512925732 | -0,263233875 | 0 | N.A. | 0 |
| ILKAP    | -0,513211489 | -0,353120368 | 0 | N.A. | 0 |
| PSMG4    | -0,513422482 | -0,244749429 | 0 | N.A. | 0 |
| NR2C2AP  | -0,513847714 | -0,391216181 | 0 | N.A. | 0 |
| SRPRB    | -0,514356769 | -0,218322812 | 0 | N.A. | 0 |
| GPN3     | -0,51445329  | -0,401599878 | 0 | N.A. | 0 |
| AATF     | -0,514523277 | -0,315225904 | 0 | N.A. | 0 |
| CPSF3    | -0,514581305 | -0,285492432 | 0 | N.A. | 0 |
| ZNHIT3   | -0,514751666 | -0,312230423 | 0 | N.A. | 0 |
| TBRG4    | -0,514920998 | -0,239667395 | 0 | N.A. | 0 |
| DRG1     | -0,515032237 | -0,339773476 | 0 | N.A. | 0 |
| HELLS    | -0,515370221 | -0,278311755 | 0 | N.A. | 0 |
| PMF1     | -0,515503363 | -0,194647029 | 0 | N.A. | 0 |
| COA3     | -0,515784376 | -0,344657296 | 0 | N.A. | 0 |
| C1orf131 | -0,516291763 | -0,045463571 | 0 | N.A. | 0 |
| BAX      | -0,516390232 | -0,62822489  | 0 | N.A. | 0 |
| MNS1     | -0,516406705 | -0,322024394 | 0 | N.A. | 0 |
| HMMR     | -0,516422838 | -0,404568974 | 0 | N.A. | 0 |
| HMGNS5   | -0,516771984 | -0,522923793 | 0 | N.A. | 0 |
| POLR2D   | -0,516846227 | -0,329160168 | 0 | N.A. | 0 |
| GLRX5    | -0,516955736 | 0,003111326  | 0 | N.A. | 0 |
| SF3B2    | -0,517095452 | -0,227721762 | 0 | N.A. | 0 |

|         |              |              |   |      |   |
|---------|--------------|--------------|---|------|---|
| DTD1    | -0,517174478 | -0,255783039 | 0 | N.A. | 0 |
| GPX2    | -0,517191561 | -0,344712896 | 0 | N.A. | 0 |
| C2orf47 | -0,51736622  | -0,410372627 | 0 | N.A. | 0 |
| ALG3    | -0,517398981 | -0,067393315 | 0 | N.A. | 0 |
| TFAP4   | -0,517544353 | -0,41433957  | 0 | N.A. | 0 |
| FAM64A  | -0,51762708  | -0,447874482 | 0 | N.A. | 0 |
| LAMTOR4 | -0,517686238 | -0,270263622 | 0 | N.A. | 0 |
| DBF4    | -0,517761709 | -0,415333842 | 0 | N.A. | 0 |
| XRCC2   | -0,518177637 | -0,356764508 | 0 | N.A. | 0 |
| RIOK1   | -0,518538566 | -0,400905642 | 0 | N.A. | 0 |
| YDJC    | -0,518653039 | -0,087354964 | 0 | N.A. | 0 |
| PRIM1   | -0,518725369 | -0,453729643 | 0 | N.A. | 0 |
| AKR7A2  | -0,519239797 | -0,2784853   | 0 | N.A. | 0 |
| CDCA3   | -0,519302526 | -0,333166098 | 0 | N.A. | 0 |
| DCTN3   | -0,519379462 | -0,466493957 | 0 | N.A. | 0 |
| PSME2   | -0,519578054 | -0,380261822 | 0 | N.A. | 0 |
| GALK1   | -0,519616571 | 0,21056616   | 0 | N.A. | 0 |
| PPIF    | -0,519735445 | -0,345589644 | 0 | N.A. | 0 |
| CETN2   | -0,520387697 | -0,478883244 | 0 | N.A. | 0 |
| CDC6    | -0,520439743 | -0,380841738 | 0 | N.A. | 0 |
| PRC1    | -0,52046809  | -0,295068334 | 0 | N.A. | 0 |
| MYBL2   | -0,52051025  | -0,340120902 | 0 | N.A. | 0 |
| B9D1    | -0,520600232 | -0,418698132 | 0 | N.A. | 0 |
| DLD     | -0,520603408 | -0,267925784 | 0 | N.A. | 0 |
| APEH    | -0,520674736 | -0,106421144 | 0 | N.A. | 0 |
| COQ2    | -0,521047645 | -0,270975621 | 0 | N.A. | 0 |
| EEF1B2  | -0,521171838 | -0,678420843 | 0 | N.A. | 0 |
| EIF3F   | -0,521177749 | -0,549483433 | 0 | N.A. | 0 |
| AURKB   | -0,521206043 | -0,402458318 | 0 | N.A. | 0 |
| MTCH1   | -0,521293716 | -0,264568062 | 0 | N.A. | 0 |
| NDUFA12 | -0,521311048 | -0,365080343 | 0 | N.A. | 0 |
| PLK1    | -0,521360725 | -0,382698039 | 0 | N.A. | 0 |
| COQ3    | -0,521662432 | -0,382225223 | 0 | N.A. | 0 |

|          |              |              |   |      |   |
|----------|--------------|--------------|---|------|---|
| UBE2C    | -0,522199427 | -0,455368214 | 0 | N.A. | 0 |
| IDH3A    | -0,522229873 | -0,373690908 | 0 | N.A. | 0 |
| C6orf203 | -0,52249882  | -0,066787902 | 0 | N.A. | 0 |
| NOL11    | -0,522900675 | -0,196290092 | 0 | N.A. | 0 |
| RBM14    | -0,522909141 | 0,063606312  | 0 | N.A. | 0 |
| KRTCAP3  | -0,522930211 | 0,010848185  | 0 | N.A. | 0 |
| CHEK2    | -0,523111782 | -0,52905332  | 0 | N.A. | 0 |
| TARDBP   | -0,523340955 | -2,6077E-05  | 0 | N.A. | 0 |
| EEF1D    | -0,5234451   | -0,629231565 | 0 | N.A. | 0 |
| HAUS7    | -0,523534838 | -0,277320148 | 0 | N.A. | 0 |
| NAA38    | -0,523670186 | -0,482262771 | 0 | N.A. | 0 |
| ECSIT    | -0,523704749 | -0,363877566 | 0 | N.A. | 0 |
| G6PC3    | -0,523821016 | -0,229091845 | 0 | N.A. | 0 |
| NUSAP1   | -0,524092014 | -0,366976386 | 0 | N.A. | 0 |
| RABEPK   | -0,524275113 | -0,316128929 | 0 | N.A. | 0 |
| PRDX1    | -0,524344971 | -0,439193922 | 0 | N.A. | 0 |
| CHCHD6   | -0,524372288 | -0,282857081 | 0 | N.A. | 0 |
| CEP55    | -0,524397772 | -0,37545891  | 0 | N.A. | 0 |
| GGH      | -0,524621669 | -0,206944421 | 0 | N.A. | 0 |
| DPH2     | -0,525138798 | -0,225268627 | 0 | N.A. | 0 |
| IFRD2    | -0,525265545 | -0,290648893 | 0 | N.A. | 0 |
| CD3EAP   | -0,525282777 | -0,391540854 | 0 | N.A. | 0 |
| DDX54    | -0,525288253 | -0,392597839 | 0 | N.A. | 0 |
| RRP9     | -0,525486696 | -0,239870019 | 0 | N.A. | 0 |
| TUBB     | -0,525535937 | -0,466722586 | 0 | N.A. | 0 |
| ALDH1B1  | -0,525553419 | -0,297309454 | 0 | N.A. | 0 |
| MTHFD1   | -0,525634336 | -0,368726945 | 0 | N.A. | 0 |
| TSEN15   | -0,526387579 | -0,348719674 | 0 | N.A. | 0 |
| NLE1     | -0,526423832 | -0,486259349 | 0 | N.A. | 0 |
| C4orf27  | -0,526702369 | -0,504815401 | 0 | N.A. | 0 |
| POLDIP2  | -0,526871825 | -0,261622504 | 0 | N.A. | 0 |
| RPA2     | -0,527201869 | -0,447992842 | 0 | N.A. | 0 |
| LIG1     | -0,527254703 | -0,355599872 | 0 | N.A. | 0 |

|          |              |              |   |      |   |
|----------|--------------|--------------|---|------|---|
| SEPHS1   | -0,527304242 | -0,381024591 | 0 | N.A. | 0 |
| CCDC74A  | -0,527374492 | -0,16634889  | 0 | N.A. | 0 |
| COX7C    | -0,527423221 | -0,522851784 | 0 | N.A. | 0 |
| TRMT10C  | -0,52758896  | -0,365286519 | 0 | N.A. | 0 |
| BOP1     | -0,527656899 | -0,242159384 | 0 | N.A. | 0 |
| RRM2     | -0,527887571 | -0,444541885 | 0 | N.A. | 0 |
| ARMC10   | -0,52801594  | -0,102445998 | 0 | N.A. | 0 |
| CENPE    | -0,528051356 | -0,250430957 | 0 | N.A. | 0 |
| BID      | -0,528902391 | -0,154290946 | 0 | N.A. | 0 |
| TUBG1    | -0,529057353 | -0,236834378 | 0 | N.A. | 0 |
| COPE     | -0,529284223 | -0,280581227 | 0 | N.A. | 0 |
| IMMT     | -0,52941132  | -0,13292697  | 0 | N.A. | 0 |
| RBMX2    | -0,529653958 | -0,268739598 | 0 | N.A. | 0 |
| SRSF11   | -0,529747849 | 0,215328961  | 0 | N.A. | 0 |
| OIP5     | -0,530162026 | -0,355720186 | 0 | N.A. | 0 |
| MPLKIP   | -0,530716259 | -0,190398812 | 0 | N.A. | 0 |
| GSPT1    | -0,530759802 | -0,212659134 | 0 | N.A. | 0 |
| ASNA1    | -0,530785846 | -0,21946481  | 0 | N.A. | 0 |
| NIPSNAP1 | -0,530802627 | -0,151442675 | 0 | N.A. | 0 |
| FABP6    | -0,530998423 | -0,441395065 | 0 | N.A. | 0 |
| SGOL1    | -0,53103347  | -0,363065571 | 0 | N.A. | 0 |
| VAR5     | -0,531055874 | -0,271244972 | 0 | N.A. | 0 |
| SPC25    | -0,531116963 | -0,426497969 | 0 | N.A. | 0 |
| PSMC2    | -0,531380348 | -0,16342488  | 0 | N.A. | 0 |
| DENR     | -0,531522902 | -0,365054668 | 0 | N.A. | 0 |
| PCMT1    | -0,531657302 | -0,122209047 | 0 | N.A. | 0 |
| TMEM106C | -0,531803276 | -0,105353975 | 0 | N.A. | 0 |
| SMC1A    | -0,532014594 | -0,143300983 | 0 | N.A. | 0 |
| POP5     | -0,532101292 | -0,365835245 | 0 | N.A. | 0 |
| NSUN5    | -0,532230489 | 0,098735637  | 0 | N.A. | 0 |
| NEDD8    | -0,532319053 | -0,4046746   | 0 | N.A. | 0 |
| MLST8    | -0,532448551 | -0,273439832 | 0 | N.A. | 0 |
| UQCR10   | -0,53252828  | -0,392222259 | 0 | N.A. | 0 |

|         |              |              |   |      |   |
|---------|--------------|--------------|---|------|---|
| PARL    | -0,533102357 | -0,225126722 | 0 | N.A. | 0 |
| PUS7L   | -0,533260704 | -0,221283322 | 0 | N.A. | 0 |
| PCID2   | -0,533986239 | -0,217521614 | 0 | N.A. | 0 |
| PSMF1   | -0,534020465 | -0,231389444 | 0 | N.A. | 0 |
| PSMD2   | -0,534064121 | -0,127789223 | 0 | N.A. | 0 |
| RPUSD3  | -0,534656767 | 0,029379963  | 0 | N.A. | 0 |
| UQCRB   | -0,534737079 | -0,580190524 | 0 | N.A. | 0 |
| ARL6IP4 | -0,534956887 | -0,280869938 | 0 | N.A. | 0 |
| HNRNPAB | -0,535044262 | -0,192711911 | 0 | N.A. | 0 |
| SAMM50  | -0,535083307 | -0,255234115 | 0 | N.A. | 0 |
| RPP40   | -0,535347083 | -0,472783034 | 0 | N.A. | 0 |
| GRPEL1  | -0,535891979 | -0,342914173 | 0 | N.A. | 0 |
| EZH2    | -0,53644133  | -0,357164716 | 0 | N.A. | 0 |
| UPF3B   | -0,536524433 | -0,1277548   | 0 | N.A. | 0 |
| NDUFB1  | -0,536596867 | -0,406557811 | 0 | N.A. | 0 |
| CTSC    | -0,537103226 | -0,509498249 | 0 | N.A. | 0 |
| ADH5    | -0,537221814 | -0,548696464 | 0 | N.A. | 0 |
| RFC4    | -0,537248175 | -0,470074638 | 0 | N.A. | 0 |
| ENOPH1  | -0,537438265 | -0,441008728 | 0 | N.A. | 0 |
| CCDC86  | -0,53792965  | -0,489042295 | 0 | N.A. | 0 |
| UBB     | -0,538280717 | -0,371298092 | 0 | N.A. | 0 |
| FANCI   | -0,538493358 | -0,424225767 | 0 | N.A. | 0 |
| AKR1A1  | -0,538692903 | -0,082843957 | 0 | N.A. | 0 |
| GTF2H5  | -0,538826817 | -0,36089869  | 0 | N.A. | 0 |
| DHFR    | -0,539091596 | -0,393661551 | 0 | N.A. | 0 |
| RFC5    | -0,539274877 | -0,388184163 | 0 | N.A. | 0 |
| GLO1    | -0,539587924 | -0,539964319 | 0 | N.A. | 0 |
| ASF1B   | -0,539963266 | -0,387607831 | 0 | N.A. | 0 |
| GEMIN6  | -0,540041804 | -0,348175595 | 0 | N.A. | 0 |
| MKI67   | -0,540062031 | -0,205144352 | 0 | N.A. | 0 |
| COQ9    | -0,540076782 | -0,238049642 | 0 | N.A. | 0 |
| POLR2L  | -0,540396872 | -0,456960444 | 0 | N.A. | 0 |
| C9orf78 | -0,540487117 | -0,234292788 | 0 | N.A. | 0 |

|         |              |              |   |      |   |
|---------|--------------|--------------|---|------|---|
| TOMM34  | -0,540524313 | -0,407981472 | 0 | N.A. | 0 |
| PYURF   | -0,540783992 | -0,520999511 | 0 | N.A. | 0 |
| AIMP1   | -0,541417769 | -0,145993684 | 0 | N.A. | 0 |
| CHEK1   | -0,541588705 | -0,456809638 | 0 | N.A. | 0 |
| CIRH1A  | -0,541908389 | -0,280376778 | 0 | N.A. | 0 |
| CKS1B   | -0,541953421 | -0,412170075 | 0 | N.A. | 0 |
| CD320   | -0,541987811 | -0,184442291 | 0 | N.A. | 0 |
| ERP29   | -0,542010797 | -0,224661163 | 0 | N.A. | 0 |
| SNX5    | -0,542052044 | -0,361072255 | 0 | N.A. | 0 |
| ATAD2   | -0,54235006  | -0,178776337 | 0 | N.A. | 0 |
| CHCHD1  | -0,542357964 | -0,216847988 | 0 | N.A. | 0 |
| NME4    | -0,542431453 | -0,364226062 | 0 | N.A. | 0 |
| KAT2A   | -0,5427193   | 0,004500844  | 0 | N.A. | 0 |
| CCDC124 | -0,542782468 | -0,210032037 | 0 | N.A. | 0 |
| HSD17B4 | -0,542800161 | -0,404739828 | 0 | N.A. | 0 |
| PSMD11  | -0,543014618 | -0,239230367 | 0 | N.A. | 0 |
| LRRCC1  | -0,543154536 | -0,335381577 | 0 | N.A. | 0 |
| PTMS    | -0,543215302 | -0,306966805 | 0 | N.A. | 0 |
| AP2S1   | -0,543384413 | -0,52909414  | 0 | N.A. | 0 |
| RRS1    | -0,544346877 | -0,060526151 | 0 | N.A. | 0 |
| COX8A   | -0,544377635 | -0,411307657 | 0 | N.A. | 0 |
| TXN2    | -0,544384544 | -0,366175963 | 0 | N.A. | 0 |
| HIBCH   | -0,544428962 | -0,492573105 | 0 | N.A. | 0 |
| MZT2A   | -0,544575676 | -0,397683448 | 0 | N.A. | 0 |
| SEPT7   | -0,544869197 | -0,41318731  | 0 | N.A. | 0 |
| CFAP20  | -0,54552417  | -0,259510689 | 0 | N.A. | 0 |
| GRSF1   | -0,545591972 | -0,278802604 | 0 | N.A. | 0 |
| GLRX3   | -0,545631382 | -0,348877386 | 0 | N.A. | 0 |
| BCS1L   | -0,545818098 | -0,339477398 | 0 | N.A. | 0 |
| ZWILCH  | -0,545845379 | -0,480246454 | 0 | N.A. | 0 |
| TMEM14A | -0,545947553 | -0,037444352 | 0 | N.A. | 0 |
| CSNK2B  | -0,545954506 | -0,212626334 | 0 | N.A. | 0 |
| CDC37   | -0,545977958 | -0,189700174 | 0 | N.A. | 0 |



|          |              |              |   |      |   |
|----------|--------------|--------------|---|------|---|
| TOR3A    | -0,546104067 | -0,371656862 | 0 | N.A. | 0 |
| CTPS1    | -0,546230014 | -0,287704996 | 0 | N.A. | 0 |
| TXN      | -0,546268949 | -0,429700017 | 0 | N.A. | 0 |
| GDI2     | -0,546651221 | -0,443650077 | 0 | N.A. | 0 |
| H3F3A    | -0,546768101 | -0,386940398 | 0 | N.A. | 0 |
| NSA2     | -0,546779494 | -0,663856596 | 0 | N.A. | 0 |
| EIF2S1   | -0,546842626 | -0,374205092 | 0 | N.A. | 0 |
| BTF3     | -0,547114992 | -0,554594735 | 0 | N.A. | 0 |
| DCXR     | -0,547155529 | -0,236080582 | 0 | N.A. | 0 |
| ITPA     | -0,54755335  | -0,213328016 | 0 | N.A. | 0 |
| C19orf70 | -0,547606128 | -0,454912822 | 0 | N.A. | 0 |
| PES1     | -0,547813858 | -0,103180055 | 0 | N.A. | 0 |
| YWHAE    | -0,547823543 | -0,1994243   | 0 | N.A. | 0 |
| MRFAP1   | -0,548185394 | -0,192771109 | 0 | N.A. | 0 |
| CENPU    | -0,548282151 | -0,430001795 | 0 | N.A. | 0 |
| DGUOK    | -0,54833289  | -0,257696703 | 0 | N.A. | 0 |
| DNAJC9   | -0,548600368 | -0,382185534 | 0 | N.A. | 0 |
| FOXM1    | -0,548619509 | -0,324903207 | 0 | N.A. | 0 |
| EIF3G    | -0,548854486 | -0,507499677 | 0 | N.A. | 0 |
| PBK      | -0,549297082 | -0,448354926 | 0 | N.A. | 0 |
| PPIB     | -0,549571679 | -0,315160902 | 0 | N.A. | 0 |
| C21orf59 | -0,549813797 | -0,033034087 | 0 | N.A. | 0 |
| AP2M1    | -0,549984886 | -0,140620704 | 0 | N.A. | 0 |
| FXN      | -0,550154651 | -0,544117453 | 0 | N.A. | 0 |
| TMX2     | -0,550284564 | 0,120375619  | 0 | N.A. | 0 |
| BOD1     | -0,55053633  | -0,515083925 | 0 | N.A. | 0 |
| TOP2A    | -0,550845935 | -0,266507102 | 0 | N.A. | 0 |
| RBBP4    | -0,550949234 | -0,478633798 | 0 | N.A. | 0 |
| HRSP12   | -0,551122394 | -0,452096242 | 0 | N.A. | 0 |
| CCNA2    | -0,55143715  | -0,401821708 | 0 | N.A. | 0 |
| MCM6     | -0,551746066 | -0,164207611 | 0 | N.A. | 0 |
| C11orf58 | -0,552040935 | -0,547254098 | 0 | N.A. | 0 |
| MYCBP    | -0,552072363 | -0,357082213 | 0 | N.A. | 0 |

|           |              |              |   |      |   |
|-----------|--------------|--------------|---|------|---|
| PTCD3     | -0,552268729 | -0,16252884  | 0 | N.A. | 0 |
| ATXN10    | -0,552320514 | -0,45847077  | 0 | N.A. | 0 |
| PRDX6     | -0,552344224 | -0,53168157  | 0 | N.A. | 0 |
| TK1       | -0,552793909 | -0,3916313   | 0 | N.A. | 0 |
| EXOSC7    | -0,552882775 | -0,348378753 | 0 | N.A. | 0 |
| SRRT      | -0,553103847 | -0,138485284 | 0 | N.A. | 0 |
| BLMH      | -0,553779194 | -0,589851897 | 0 | N.A. | 0 |
| TIMM23    | -0,553782603 | -0,408244301 | 0 | N.A. | 0 |
| KIF22     | -0,553895167 | -0,275133932 | 0 | N.A. | 0 |
| EIF1AX    | -0,554258486 | -0,359730987 | 0 | N.A. | 0 |
| FEN1      | -0,554429744 | -0,355093685 | 0 | N.A. | 0 |
| SLBP      | -0,554477835 | -0,326430135 | 0 | N.A. | 0 |
| HNRNPA1L2 | -0,554510204 | -0,36202127  | 0 | N.A. | 0 |
| AAAS      | -0,554884639 | -0,391196736 | 0 | N.A. | 0 |
| NUDT15    | -0,555075165 | -0,474222041 | 0 | N.A. | 0 |
| TFB2M     | -0,555172209 | -0,415634119 | 0 | N.A. | 0 |
| LTV1      | -0,55527731  | -0,512860318 | 0 | N.A. | 0 |
| PSMG2     | -0,555497949 | -0,383048666 | 0 | N.A. | 0 |
| SNRPA1    | -0,555503642 | -0,262748549 | 0 | N.A. | 0 |
| NDUFS2    | -0,555871115 | -0,082100617 | 0 | N.A. | 0 |
| CKAP2     | -0,55594037  | -0,458007609 | 0 | N.A. | 0 |
| TIMM8B    | -0,5560712   | -0,466387833 | 0 | N.A. | 0 |
| MAZ       | -0,556568169 | -0,198845223 | 0 | N.A. | 0 |
| NTPCR     | -0,556642202 | -0,437718939 | 0 | N.A. | 0 |
| LSM8      | -0,557134653 | -0,474041417 | 0 | N.A. | 0 |
| TECR      | -0,557192257 | 0,113049129  | 0 | N.A. | 0 |
| COX11     | -0,557424771 | -0,426020228 | 0 | N.A. | 0 |
| KHDRBS1   | -0,557494523 | -0,369936706 | 0 | N.A. | 0 |
| TWISTNB   | -0,557602016 | -0,198703743 | 0 | N.A. | 0 |
| CDT1      | -0,557633662 | -0,362163395 | 0 | N.A. | 0 |
| CDCA5     | -0,557681475 | -0,379908919 | 0 | N.A. | 0 |
| IDH3B     | -0,557969598 | -0,380264225 | 0 | N.A. | 0 |
| MGST1     | -0,557987067 | -0,225208257 | 0 | N.A. | 0 |

|          |              |              |   |      |   |
|----------|--------------|--------------|---|------|---|
| CCNB2    | -0,558065388 | -0,460629163 | 0 | N.A. | 0 |
| SLC25A3  | -0,558126991 | -0,377390053 | 0 | N.A. | 0 |
| PHF19    | -0,558347508 | -0,417369768 | 0 | N.A. | 0 |
| HNRNPH3  | -0,558427659 | -0,458765039 | 0 | N.A. | 0 |
| DDX56    | -0,558474228 | -0,41502213  | 0 | N.A. | 0 |
| UQCRC1   | -0,558542249 | -0,212261203 | 0 | N.A. | 0 |
| NUTF2    | -0,558610599 | -0,285317828 | 0 | N.A. | 0 |
| YWHAQ    | -0,558735118 | -0,241908074 | 0 | N.A. | 0 |
| TERF1    | -0,558887176 | -0,151681734 | 0 | N.A. | 0 |
| MFF      | -0,559158057 | -0,297423403 | 0 | N.A. | 0 |
| POC1A    | -0,559327339 | -0,375445479 | 0 | N.A. | 0 |
| COX7B    | -0,559505395 | -0,461526705 | 0 | N.A. | 0 |
| PSMB6    | -0,559605166 | -0,454704504 | 0 | N.A. | 0 |
| DSCC1    | -0,559782538 | -0,453560972 | 0 | N.A. | 0 |
| MND1     | -0,559892065 | -0,459225271 | 0 | N.A. | 0 |
| DCUN1D5  | -0,560006501 | -0,446163483 | 0 | N.A. | 0 |
| CCDC58   | -0,560111517 | -0,395737893 | 0 | N.A. | 0 |
| DAP3     | -0,560800615 | -0,424396977 | 0 | N.A. | 0 |
| MAGEF1   | -0,561996592 | -0,378185698 | 0 | N.A. | 0 |
| NHP2L1   | -0,562112869 | -0,530069123 | 0 | N.A. | 0 |
| UQCRFS1  | -0,562242895 | -0,430756354 | 0 | N.A. | 0 |
| KLHDC3   | -0,562303181 | -0,394069396 | 0 | N.A. | 0 |
| KPNA2    | -0,562323235 | -0,435522435 | 0 | N.A. | 0 |
| UQCRC2   | -0,562330902 | -0,413118923 | 0 | N.A. | 0 |
| NUF2     | -0,562395859 | -0,302205385 | 0 | N.A. | 0 |
| STIP1    | -0,5625488   | -0,26503112  | 0 | N.A. | 0 |
| SKA3     | -0,562653277 | -0,490423521 | 0 | N.A. | 0 |
| C14orf2  | -0,562939624 | -0,542143851 | 0 | N.A. | 0 |
| CCNB1    | -0,562961892 | -0,444945962 | 0 | N.A. | 0 |
| RCN1     | -0,563238906 | -0,24275832  | 0 | N.A. | 0 |
| TIMM8A   | -0,56325358  | -0,339778846 | 0 | N.A. | 0 |
| TIMM50   | -0,5633055   | -0,441276664 | 0 | N.A. | 0 |
| SLC25A10 | -0,56376413  | -0,127365614 | 0 | N.A. | 0 |

|          |              |              |   |      |   |
|----------|--------------|--------------|---|------|---|
| EXOSC3   | -0,564303129 | -0,385968768 | 0 | N.A. | 0 |
| SDHC     | -0,564532375 | -0,540035665 | 0 | N.A. | 0 |
| SMARCC1  | -0,564571457 | -0,200751399 | 0 | N.A. | 0 |
| TYMS     | -0,56512514  | -0,526957044 | 0 | N.A. | 0 |
| COX4I1   | -0,565353008 | -0,392393658 | 0 | N.A. | 0 |
| MALSU1   | -0,565375049 | -0,386908712 | 0 | N.A. | 0 |
| IMMP1L   | -0,565394871 | -0,367295872 | 0 | N.A. | 0 |
| HDAC1    | -0,565725449 | -0,077091589 | 0 | N.A. | 0 |
| COMMD8   | -0,566195813 | -0,316370011 | 0 | N.A. | 0 |
| RAD51AP1 | -0,566444118 | -0,434315864 | 0 | N.A. | 0 |
| NOP56    | -0,567166624 | -0,251894733 | 0 | N.A. | 0 |
| NOL7     | -0,567663091 | -0,354402339 | 0 | N.A. | 0 |
| RCC1     | -0,567811446 | -0,309540101 | 0 | N.A. | 0 |
| MZT1     | -0,568106496 | -0,450485902 | 0 | N.A. | 0 |
| POP7     | -0,568203645 | -0,440608603 | 0 | N.A. | 0 |
| HINT2    | -0,568318893 | -0,264925613 | 0 | N.A. | 0 |
| HMBS     | -0,568515501 | -0,390988458 | 0 | N.A. | 0 |
| UQCC2    | -0,568625144 | -0,583595748 | 0 | N.A. | 0 |
| CDC20    | -0,568744347 | -0,370327009 | 0 | N.A. | 0 |
| GBAS     | -0,568972623 | -0,535523067 | 0 | N.A. | 0 |
| UHL3     | -0,569129098 | -0,136998777 | 0 | N.A. | 0 |
| RAD51C   | -0,569533534 | -0,369318464 | 0 | N.A. | 0 |
| BCCIP    | -0,569746822 | -0,35067299  | 0 | N.A. | 0 |
| HAT1     | -0,569871232 | -0,289079099 | 0 | N.A. | 0 |
| MKKS     | -0,570035848 | -0,2210748   | 0 | N.A. | 0 |
| POLR2F   | -0,570102883 | -0,503406543 | 0 | N.A. | 0 |
| SMC2     | -0,570197481 | -0,191810558 | 0 | N.A. | 0 |
| PSMD13   | -0,570288975 | -0,197487273 | 0 | N.A. | 0 |
| HES6     | -0,570559183 | -0,378840231 | 0 | N.A. | 0 |
| CDCA7L   | -0,570595269 | -0,570703564 | 0 | N.A. | 0 |
| PRKDC    | -0,570706615 | -0,083534411 | 0 | N.A. | 0 |
| UTP18    | -0,570718991 | -0,336426448 | 0 | N.A. | 0 |
| PNO1     | -0,570962226 | -0,213750887 | 0 | N.A. | 0 |

|          |              |              |   |      |   |
|----------|--------------|--------------|---|------|---|
| NDUFA11  | -0,571111271 | -0,413748658 | 0 | N.A. | 0 |
| PPIG     | -0,571126409 | -0,0446967   | 0 | N.A. | 0 |
| SF3A3    | -0,571273173 | -0,474705312 | 0 | N.A. | 0 |
| TMA16    | -0,571324436 | -0,25210684  | 0 | N.A. | 0 |
| CBX5     | -0,571372337 | -0,291057233 | 0 | N.A. | 0 |
| SAC3D1   | -0,571712111 | -0,228878288 | 0 | N.A. | 0 |
| MCM2     | -0,571914923 | -0,26043133  | 0 | N.A. | 0 |
| TBCA     | -0,572144953 | -0,41580612  | 0 | N.A. | 0 |
| KIAA0101 | -0,572311867 | -0,512659026 | 0 | N.A. | 0 |
| COPS3    | -0,572572384 | -0,405969658 | 0 | N.A. | 0 |
| EIF5A    | -0,572871552 | -0,557385437 | 0 | N.A. | 0 |
| GSS      | -0,572899011 | -0,087298525 | 0 | N.A. | 0 |
| RARS     | -0,572980429 | -0,032478301 | 0 | N.A. | 0 |
| PSMG3    | -0,573464952 | -0,272933343 | 0 | N.A. | 0 |
| LUC7L3   | -0,573464984 | 0,035908126  | 0 | N.A. | 0 |
| PYCR1    | -0,574045202 | -0,315248965 | 0 | N.A. | 0 |
| ANAPC11  | -0,57433739  | -0,329527347 | 0 | N.A. | 0 |
| TCOF1    | -0,574473311 | -0,414194558 | 0 | N.A. | 0 |
| GPATCH4  | -0,574478828 | -0,265016863 | 0 | N.A. | 0 |
| RFC2     | -0,57489471  | -0,444056861 | 0 | N.A. | 0 |
| DEK      | -0,574904962 | -0,159328397 | 0 | N.A. | 0 |
| TOMM22   | -0,575009278 | -0,513785852 | 0 | N.A. | 0 |
| PHF20    | -0,575615242 | -0,245975063 | 0 | N.A. | 0 |
| PSMB7    | -0,576014663 | -0,420150854 | 0 | N.A. | 0 |
| ABCE1    | -0,576118141 | -0,311755321 | 0 | N.A. | 0 |
| TPX2     | -0,576247122 | -0,448924223 | 0 | N.A. | 0 |
| SRP72    | -0,576777091 | -0,285217524 | 0 | N.A. | 0 |
| CHCHD2   | -0,577060753 | -0,446890084 | 0 | N.A. | 0 |
| KIF20B   | -0,577066361 | -0,31142375  | 0 | N.A. | 0 |
| DHRS4    | -0,577234142 | -0,241715237 | 0 | N.A. | 0 |
| C8orf59  | -0,577514875 | -0,311796788 | 0 | N.A. | 0 |
| VPS29    | -0,578848517 | -0,374011556 | 0 | N.A. | 0 |
| PSMD6    | -0,578944365 | -0,365183224 | 0 | N.A. | 0 |

|          |              |              |   |      |   |
|----------|--------------|--------------|---|------|---|
| EIF3M    | -0,578957581 | -0,533774593 | 0 | N.A. | 0 |
| RSL1D1   | -0,579454951 | -0,490302294 | 0 | N.A. | 0 |
| TKT      | -0,579459882 | -0,431575571 | 0 | N.A. | 0 |
| NONO     | -0,579565164 | -0,567410597 | 0 | N.A. | 0 |
| DPM1     | -0,57968125  | -0,310004318 | 0 | N.A. | 0 |
| CENPF    | -0,580365678 | -0,189082737 | 0 | N.A. | 0 |
| SKP2     | -0,580452338 | -0,433635104 | 0 | N.A. | 0 |
| RAE1     | -0,580456835 | -0,384876026 | 0 | N.A. | 0 |
| UQCRH    | -0,580492462 | -0,602488632 | 0 | N.A. | 0 |
| CENPK    | -0,580763749 | -0,479634539 | 0 | N.A. | 0 |
| WDR74    | -0,580813166 | -0,243904889 | 0 | N.A. | 0 |
| RRP15    | -0,581055034 | -0,017347943 | 0 | N.A. | 0 |
| TXNDC12  | -0,581278033 | -0,234447433 | 0 | N.A. | 0 |
| COMMD4   | -0,581741035 | -0,514335147 | 0 | N.A. | 0 |
| CBR1     | -0,58188535  | -0,128748442 | 0 | N.A. | 0 |
| LHX4-AS1 | -0,582024925 | -0,382213108 | 0 | N.A. | 0 |
| RFC3     | -0,582332538 | -0,479122245 | 0 | N.A. | 0 |
| GOT2     | -0,582369813 | -0,364451977 | 0 | N.A. | 0 |
| NIFK     | -0,582619647 | -0,384636643 | 0 | N.A. | 0 |
| OAT      | -0,58287906  | -0,214129922 | 0 | N.A. | 0 |
| VRK1     | -0,582982886 | -0,412951608 | 0 | N.A. | 0 |
| NSMCE1   | -0,583065554 | -0,499485046 | 0 | N.A. | 0 |
| COX6C    | -0,583162046 | -0,441248701 | 0 | N.A. | 0 |
| PSMA7    | -0,583172226 | -0,422020847 | 0 | N.A. | 0 |
| SHMT1    | -0,583314607 | -0,271705394 | 0 | N.A. | 0 |
| SNRPB2   | -0,583336533 | -0,35161918  | 0 | N.A. | 0 |
| PDCD2    | -0,583346607 | -0,381360462 | 0 | N.A. | 0 |
| PRDX4    | -0,583692514 | -0,225090357 | 0 | N.A. | 0 |
| PUF60    | -0,583744737 | -0,362623022 | 0 | N.A. | 0 |
| ATAD3A   | -0,583787973 | -0,343892376 | 0 | N.A. | 0 |
| PARPBP   | -0,584142903 | -0,423285468 | 0 | N.A. | 0 |
| NDUFC1   | -0,584658575 | -0,41026447  | 0 | N.A. | 0 |
| FARSB    | -0,584896892 | -0,336339906 | 0 | N.A. | 0 |

|             |              |              |   |      |   |
|-------------|--------------|--------------|---|------|---|
| UBE2N       | -0,585162608 | -0,520374519 | 0 | N.A. | 0 |
| ENY2        | -0,585167617 | -0,453408738 | 0 | N.A. | 0 |
| PHF5A       | -0,586019046 | -0,385588642 | 0 | N.A. | 0 |
| LMNB1       | -0,586111682 | -0,492625788 | 0 | N.A. | 0 |
| PSMB2       | -0,586451461 | -0,475043822 | 0 | N.A. | 0 |
| PIN1        | -0,586642327 | -0,214471239 | 0 | N.A. | 0 |
| ORC6        | -0,586822499 | -0,32751364  | 0 | N.A. | 0 |
| KPNB1       | -0,586885711 | -0,073465177 | 0 | N.A. | 0 |
| RNPEP       | -0,586996835 | 0,047713235  | 0 | N.A. | 0 |
| CTC-524C5.2 | -0,587210933 | -0,181126803 | 0 | N.A. | 0 |
| ITGAE       | -0,587510097 | -0,573022707 | 0 | N.A. | 0 |
| UROS        | -0,587664737 | -0,307241728 | 0 | N.A. | 0 |
| ATP5I       | -0,5877946   | -0,545888805 | 0 | N.A. | 0 |
| LAS1L       | -0,587823013 | -0,228422577 | 0 | N.A. | 0 |
| RMI2        | -0,587952647 | -0,335900448 | 0 | N.A. | 0 |
| C7orf50     | -0,588092125 | -0,531356106 | 0 | N.A. | 0 |
| SIGMAR1     | -0,588381588 | -0,151357244 | 0 | N.A. | 0 |
| ATP5H       | -0,588556484 | -0,422703992 | 0 | N.A. | 0 |
| POLR2I      | -0,588584556 | -0,297750715 | 0 | N.A. | 0 |
| NDUFB3      | -0,588887354 | -0,457456623 | 0 | N.A. | 0 |
| RRM1        | -0,589709846 | -0,421318248 | 0 | N.A. | 0 |
| NAP1L1      | -0,590025181 | -0,636504802 | 0 | N.A. | 0 |
| ATP5D       | -0,591197387 | -0,505164043 | 0 | N.A. | 0 |
| FARSA       | -0,59135205  | -0,251363129 | 0 | N.A. | 0 |
| NDUFB7      | -0,591539557 | -0,281942518 | 0 | N.A. | 0 |
| PTGES2      | -0,591717646 | -0,28609583  | 0 | N.A. | 0 |
| TROAP       | -0,591929821 | -0,323079802 | 0 | N.A. | 0 |
| RBM3        | -0,591932    | -0,526168627 | 0 | N.A. | 0 |
| TRAPPC2L    | -0,59296084  | -0,338821212 | 0 | N.A. | 0 |
| DPY30       | -0,59351708  | -0,362706256 | 0 | N.A. | 0 |
| DBI         | -0,593550503 | -0,526266715 | 0 | N.A. | 0 |
| SMC4        | -0,593800477 | -0,300982137 | 0 | N.A. | 0 |
| PSMB4       | -0,594433885 | -0,373385793 | 0 | N.A. | 0 |

|          |              |              |   |      |   |
|----------|--------------|--------------|---|------|---|
| SUB1     | -0,594560944 | -0,424285559 | 0 | N.A. | 0 |
| DNAJC2   | -0,594848074 | -0,364881558 | 0 | N.A. | 0 |
| C12orf45 | -0,594954539 | -0,396891446 | 0 | N.A. | 0 |
| HSPBP1   | -0,595626252 | -0,285015818 | 0 | N.A. | 0 |
| SDHB     | -0,595772901 | -0,264336318 | 0 | N.A. | 0 |
| LBR      | -0,595929248 | -0,111349759 | 0 | N.A. | 0 |
| PSMB8    | -0,5961774   | -0,434722644 | 0 | N.A. | 0 |
| ANP32E   | -0,596302293 | -0,41090371  | 0 | N.A. | 0 |
| CENPH    | -0,596710814 | -0,554032846 | 0 | N.A. | 0 |
| PSMD4    | -0,596771064 | -0,34121233  | 0 | N.A. | 0 |
| NUP37    | -0,597068118 | -0,243015563 | 0 | N.A. | 0 |
| COPRS    | -0,597351278 | -0,347074209 | 0 | N.A. | 0 |
| ITGB3BP  | -0,597574315 | -0,421776233 | 0 | N.A. | 0 |
| SNF8     | -0,5977223   | -0,294463749 | 0 | N.A. | 0 |
| MCM5     | -0,598092214 | -0,281953311 | 0 | N.A. | 0 |
| ECE2     | -0,598282799 | -0,426948995 | 0 | N.A. | 0 |
| ALDH7A1  | -0,598498144 | -0,433336906 | 0 | N.A. | 0 |
| ZWINT    | -0,598625182 | -0,411307759 | 0 | N.A. | 0 |
| PSMB5    | -0,598826609 | -0,413113891 | 0 | N.A. | 0 |
| POLR2K   | -0,598854706 | -0,550783895 | 0 | N.A. | 0 |
| OLA1     | -0,599281227 | -0,467128678 | 0 | N.A. | 0 |
| TSFM     | -0,599426322 | -0,461761566 | 0 | N.A. | 0 |
| DAZAP1   | -0,599548193 | -0,192602621 | 0 | N.A. | 0 |
| ADSL     | -0,599968871 | -0,475402666 | 0 | N.A. | 0 |
| C16orf13 | -0,600027873 | -0,3873336   | 0 | N.A. | 0 |
| MMAB     | -0,600445518 | -0,311867601 | 0 | N.A. | 0 |
| TRUB2    | -0,600493338 | -0,391772596 | 0 | N.A. | 0 |
| PPIL1    | -0,600571422 | -0,376916581 | 0 | N.A. | 0 |
| NDUFA5   | -0,600578712 | -0,571684975 | 0 | N.A. | 0 |
| FAM136A  | -0,60069117  | -0,176789783 | 0 | N.A. | 0 |
| NOLC1    | -0,602136448 | -0,286053734 | 0 | N.A. | 0 |
| TIMM10   | -0,602158856 | -0,497096446 | 0 | N.A. | 0 |
| CENPW    | -0,60224508  | -0,423164262 | 0 | N.A. | 0 |



|         |              |              |   |      |   |
|---------|--------------|--------------|---|------|---|
| EIF4H   | -0,602372411 | -0,362008853 | 0 | N.A. | 0 |
| SKA2    | -0,602490689 | -0,476444965 | 0 | N.A. | 0 |
| HSPA14  | -0,602502032 | -0,200802453 | 0 | N.A. | 0 |
| HSPA9   | -0,602660094 | -0,150657087 | 0 | N.A. | 0 |
| CLPP    | -0,603345748 | -0,448386414 | 0 | N.A. | 0 |
| CIAPIN1 | -0,603418598 | -0,299697918 | 0 | N.A. | 0 |
| GINS2   | -0,603443045 | -0,420337819 | 0 | N.A. | 0 |
| MLEC    | -0,603926679 | -0,125982536 | 0 | N.A. | 0 |
| MIS18A  | -0,604242702 | -0,409401412 | 0 | N.A. | 0 |
| NAA10   | -0,604651797 | -0,361636778 | 0 | N.A. | 0 |
| CYCS    | -0,604688465 | -0,513721261 | 0 | N.A. | 0 |
| NABP2   | -0,604917475 | -0,48826828  | 0 | N.A. | 0 |
| PSMA5   | -0,605119504 | -0,299420231 | 0 | N.A. | 0 |
| HPRT1   | -0,605153076 | -0,578645698 | 0 | N.A. | 0 |
| COA4    | -0,605349739 | -0,209107845 | 0 | N.A. | 0 |
| TRIP13  | -0,605392752 | -0,442983423 | 0 | N.A. | 0 |
| ATPAF1  | -0,606010013 | -0,337684722 | 0 | N.A. | 0 |
| ATP5O   | -0,60653683  | -0,35725773  | 0 | N.A. | 0 |
| PSMB3   | -0,607138251 | -0,485546432 | 0 | N.A. | 0 |
| CYB5A   | -0,60725058  | -0,427527983 | 0 | N.A. | 0 |
| PDHB    | -0,607571492 | -0,32293686  | 0 | N.A. | 0 |
| PAK1IP1 | -0,60774656  | -0,360639831 | 0 | N.A. | 0 |
| UBE2T   | -0,607890494 | -0,405466733 | 0 | N.A. | 0 |
| LYRM4   | -0,60868857  | -0,483241528 | 0 | N.A. | 0 |
| PTDSS1  | -0,608693048 | -0,477489115 | 0 | N.A. | 0 |
| DNAJC8  | -0,608999955 | -0,524179758 | 0 | N.A. | 0 |
| CDKN3   | -0,610186344 | -0,440976136 | 0 | N.A. | 0 |
| ATPIF1  | -0,610225873 | -0,437846472 | 0 | N.A. | 0 |
| EIF5B   | -0,610341798 | -0,018365285 | 0 | N.A. | 0 |
| ATG3    | -0,611111758 | -0,392023124 | 0 | N.A. | 0 |
| SDHD    | -0,611263298 | -0,544403492 | 0 | N.A. | 0 |
| TRIAP1  | -0,611458804 | -0,487593249 | 0 | N.A. | 0 |
| WDR61   | -0,612209299 | -0,35975196  | 0 | N.A. | 0 |

|            |              |              |   |      |   |
|------------|--------------|--------------|---|------|---|
| REPIN1     | -0,613263817 | -0,17759325  | 0 | N.A. | 0 |
| GMPS       | -0,613401726 | -0,313596209 | 0 | N.A. | 0 |
| ECHS1      | -0,613584398 | -0,300386074 | 0 | N.A. | 0 |
| SLC25A39   | -0,613811325 | -0,433705651 | 0 | N.A. | 0 |
| MAD2L1     | -0,614092088 | -0,466486826 | 0 | N.A. | 0 |
| PRPF40A    | -0,614358923 | -0,123050021 | 0 | N.A. | 0 |
| SMARCB1    | -0,614455614 | -0,407442147 | 0 | N.A. | 0 |
| SHFM1      | -0,615320663 | -0,498676846 | 0 | N.A. | 0 |
| NOP16      | -0,615414491 | -0,278060073 | 0 | N.A. | 0 |
| SAE1       | -0,615604947 | -0,511903176 | 0 | N.A. | 0 |
| HDDC2      | -0,615791602 | -0,457091509 | 0 | N.A. | 0 |
| HSP90AA1   | -0,615830604 | -0,088997784 | 0 | N.A. | 0 |
| PSMD14     | -0,615905788 | -0,260335072 | 0 | N.A. | 0 |
| ACN9       | -0,616245375 | -0,359235433 | 0 | N.A. | 0 |
| APITD1     | -0,616454275 | -0,420366807 | 0 | N.A. | 0 |
| AIMP2      | -0,616587507 | -0,335766912 | 0 | N.A. | 0 |
| CECR5      | -0,616613399 | -0,2984741   | 0 | N.A. | 0 |
| ARL2       | -0,616669679 | -0,387836491 | 0 | N.A. | 0 |
| PDCD6      | -0,616746175 | -0,329202196 | 0 | N.A. | 0 |
| METTL5     | -0,617420486 | -0,203508318 | 0 | N.A. | 0 |
| COPS5      | -0,617894496 | -0,1348393   | 0 | N.A. | 0 |
| AK2        | -0,618000933 | -0,411805642 | 0 | N.A. | 0 |
| ATP5J      | -0,618076799 | -0,439213674 | 0 | N.A. | 0 |
| GADD45GIP1 | -0,618185994 | -0,371152564 | 0 | N.A. | 0 |
| PRPF31     | -0,618602732 | -0,362601622 | 0 | N.A. | 0 |
| BIRC5      | -0,618886916 | -0,495814881 | 0 | N.A. | 0 |
| FIBP       | -0,618952783 | -0,331892861 | 0 | N.A. | 0 |
| DDX39A     | -0,619009212 | -0,377339302 | 0 | N.A. | 0 |
| C11orf73   | -0,619029874 | -0,324461969 | 0 | N.A. | 0 |
| MEST       | -0,619118647 | -0,313921638 | 0 | N.A. | 0 |
| SRSF9      | -0,619283321 | -0,146193095 | 0 | N.A. | 0 |
| GNL3       | -0,619449225 | -0,304184045 | 0 | N.A. | 0 |
| PDSS1      | -0,619924214 | -0,368079243 | 0 | N.A. | 0 |

|           |              |              |   |      |   |
|-----------|--------------|--------------|---|------|---|
| SRSF10    | -0,620137609 | -0,008823748 | 0 | N.A. | 0 |
| NAA20     | -0,62016852  | -0,34840941  | 0 | N.A. | 0 |
| TMPO      | -0,620521711 | -0,32623003  | 0 | N.A. | 0 |
| NUBP2     | -0,620601326 | -0,378655259 | 0 | N.A. | 0 |
| PPID      | -0,620624968 | -0,30901899  | 0 | N.A. | 0 |
| ADI1      | -0,620647973 | -0,322773518 | 0 | N.A. | 0 |
| ALDH9A1   | -0,621461388 | -0,392444978 | 0 | N.A. | 0 |
| EIF4A1    | -0,622787346 | -0,450745054 | 0 | N.A. | 0 |
| EXOSC8    | -0,62284358  | -0,472672006 | 0 | N.A. | 0 |
| PSMA4     | -0,622854646 | -0,530035252 | 0 | N.A. | 0 |
| POLE3     | -0,622940609 | -0,485842019 | 0 | N.A. | 0 |
| CENPN     | -0,623231839 | -0,521818115 | 0 | N.A. | 0 |
| C14orf166 | -0,623273089 | -0,581386497 | 0 | N.A. | 0 |
| GSTO1     | -0,623734759 | -0,506326732 | 0 | N.A. | 0 |
| U2SURP    | -0,623847113 | 0,101926659  | 0 | N.A. | 0 |
| NDUFS7    | -0,623971598 | -0,579728686 | 0 | N.A. | 0 |
| CNBP      | -0,624230983 | -0,291173436 | 0 | N.A. | 0 |
| LYAR      | -0,624532461 | -0,444646882 | 0 | N.A. | 0 |
| COX14     | -0,624840522 | -0,391370779 | 0 | N.A. | 0 |
| ATIC      | -0,625720911 | -0,396112774 | 0 | N.A. | 0 |
| SFXN4     | -0,626117146 | -0,286973392 | 0 | N.A. | 0 |
| TMEM14B   | -0,626382242 | -0,41714112  | 0 | N.A. | 0 |
| KARS      | -0,626522751 | -0,29029759  | 0 | N.A. | 0 |
| HINT1     | -0,626717883 | -0,489620527 | 0 | N.A. | 0 |
| DNMT1     | -0,627282906 | -0,269792505 | 0 | N.A. | 0 |
| FH        | -0,62738921  | -0,546856943 | 0 | N.A. | 0 |
| C19orf48  | -0,62743633  | -0,505988206 | 0 | N.A. | 0 |
| DTYMK     | -0,627483601 | -0,408510958 | 0 | N.A. | 0 |
| PPP1CC    | -0,627499813 | -0,419053232 | 0 | N.A. | 0 |
| AIFM1     | -0,628275967 | -0,483096492 | 0 | N.A. | 0 |
| NDUFA4    | -0,628455204 | -0,506979857 | 0 | N.A. | 0 |
| UNG       | -0,628516366 | -0,367041598 | 0 | N.A. | 0 |
| PAFAH1B3  | -0,628759775 | -0,275993254 | 0 | N.A. | 0 |

|          |              |              |   |      |   |
|----------|--------------|--------------|---|------|---|
| NIT2     | -0,628909957 | -0,350212327 | 0 | N.A. | 0 |
| SLC25A5  | -0,628962111 | -0,472663295 | 0 | N.A. | 0 |
| MRTO4    | -0,630083357 | -0,504904137 | 0 | N.A. | 0 |
| RNASEH2A | -0,630434382 | -0,39493378  | 0 | N.A. | 0 |
| PPA2     | -0,630502037 | -0,329561826 | 0 | N.A. | 0 |
| STRAP    | -0,630792739 | -0,51133529  | 0 | N.A. | 0 |
| ZNF511   | -0,630869022 | -0,296815606 | 0 | N.A. | 0 |
| NDUFB2   | -0,630985201 | -0,502565335 | 0 | N.A. | 0 |
| PSMB1    | -0,631191237 | -0,398134929 | 0 | N.A. | 0 |
| THYN1    | -0,631353302 | -0,385826854 | 0 | N.A. | 0 |
| MAGOHB   | -0,631499215 | -0,481746131 | 0 | N.A. | 0 |
| GTF3A    | -0,631508015 | -0,502654565 | 0 | N.A. | 0 |
| DDX1     | -0,631647462 | -0,246651224 | 0 | N.A. | 0 |
| ADK      | -0,632145434 | -0,544460501 | 0 | N.A. | 0 |
| CASP6    | -0,63303567  | -0,335173281 | 0 | N.A. | 0 |
| NELFCD   | -0,633252067 | -0,212781171 | 0 | N.A. | 0 |
| APRT     | -0,633338787 | -0,500104015 | 0 | N.A. | 0 |
| MCM3     | -0,633782782 | -0,33781701  | 0 | N.A. | 0 |
| PSMA3    | -0,633793864 | -0,478767616 | 0 | N.A. | 0 |
| BUB3     | -0,634126307 | -0,510046648 | 0 | N.A. | 0 |
| GAR1     | -0,634824179 | -0,319418072 | 0 | N.A. | 0 |
| PTTG1    | -0,636242242 | -0,458141076 | 0 | N.A. | 0 |
| KIF9     | -0,63657288  | -0,360804111 | 0 | N.A. | 0 |
| TALDO1   | -0,636794125 | -0,491639619 | 0 | N.A. | 0 |
| EWSR1    | -0,636876501 | -0,138469696 | 0 | N.A. | 0 |
| XRN2     | -0,637029377 | -0,453145832 | 0 | N.A. | 0 |
| PRPF19   | -0,637077944 | -0,398202428 | 0 | N.A. | 0 |
| PCNA     | -0,637117017 | -0,383244955 | 0 | N.A. | 0 |
| HMGB2    | -0,637460893 | -0,483893487 | 0 | N.A. | 0 |
| TOMM40   | -0,637485783 | -0,279783    | 0 | N.A. | 0 |
| SAAL1    | -0,637532201 | -0,459442982 | 0 | N.A. | 0 |
| TPRKB    | -0,637565361 | -0,462442845 | 0 | N.A. | 0 |
| REXO2    | -0,637621512 | -0,102109372 | 0 | N.A. | 0 |

|         |              |              |   |      |   |
|---------|--------------|--------------|---|------|---|
| PSMC5   | -0,637983272 | -0,415277317 | 0 | N.A. | 0 |
| DCAF13  | -0,6383553   | -0,318690924 | 0 | N.A. | 0 |
| CSE1L   | -0,638550228 | -0,391228916 | 0 | N.A. | 0 |
| ANP32A  | -0,638940273 | -0,432291716 | 0 | N.A. | 0 |
| TFAM    | -0,639670535 | -0,35416402  | 0 | N.A. | 0 |
| RBM17   | -0,639837136 | -0,331531928 | 0 | N.A. | 0 |
| NDUFA9  | -0,639901522 | -0,124572723 | 0 | N.A. | 0 |
| TFDP1   | -0,640045995 | -0,342792334 | 0 | N.A. | 0 |
| VDAC3   | -0,640336252 | -0,321622913 | 0 | N.A. | 0 |
| EXOSC5  | -0,641043026 | -0,377335314 | 0 | N.A. | 0 |
| NDUFC2  | -0,641738799 | -0,177775656 | 0 | N.A. | 0 |
| FKBP3   | -0,642227687 | -0,345968351 | 0 | N.A. | 0 |
| SPCS1   | -0,642248004 | -0,351781642 | 0 | N.A. | 0 |
| POLR2H  | -0,642331725 | -0,36976403  | 0 | N.A. | 0 |
| SNRNP40 | -0,642772579 | -0,505803058 | 0 | N.A. | 0 |
| WDR77   | -0,644105523 | -0,512089473 | 0 | N.A. | 0 |
| TAF15   | -0,64421135  | -0,257833027 | 0 | N.A. | 0 |
| TRAP1   | -0,644578866 | -0,350054922 | 0 | N.A. | 0 |
| HADH    | -0,644933434 | -0,395344763 | 0 | N.A. | 0 |
| SET     | -0,644946507 | -0,266015512 | 0 | N.A. | 0 |
| RUVBL2  | -0,645712762 | -0,318325824 | 0 | N.A. | 0 |
| MCM4    | -0,645915976 | -0,429444592 | 0 | N.A. | 0 |
| STRA13  | -0,646277442 | -0,419206149 | 0 | N.A. | 0 |
| XRCC5   | -0,646288535 | -0,314939614 | 0 | N.A. | 0 |
| PSMD3   | -0,646407113 | -0,309241526 | 0 | N.A. | 0 |
| SRSF2   | -0,646687796 | -0,425808795 | 0 | N.A. | 0 |
| GMNN    | -0,64722473  | -0,341056071 | 0 | N.A. | 0 |
| APEX1   | -0,647326555 | -0,449293391 | 0 | N.A. | 0 |
| COA1    | -0,647737812 | -0,43362902  | 0 | N.A. | 0 |
| RPIA    | -0,647814729 | -0,465254854 | 0 | N.A. | 0 |
| SNRPG   | -0,647925177 | -0,422372882 | 0 | N.A. | 0 |
| HNRNPC  | -0,648478881 | -0,433866949 | 0 | N.A. | 0 |
| PLEKHJ1 | -0,648654204 | -0,066586011 | 0 | N.A. | 0 |

|          |              |              |   |      |   |
|----------|--------------|--------------|---|------|---|
| SRM      | -0,648714077 | -0,425513683 | 0 | N.A. | 0 |
| PDCD5    | -0,648976171 | -0,383112678 | 0 | N.A. | 0 |
| CUTA     | -0,649051499 | -0,620841088 | 0 | N.A. | 0 |
| PFDN6    | -0,649531729 | -0,407953228 | 0 | N.A. | 0 |
| POLR3K   | -0,64982835  | -0,401985974 | 0 | N.A. | 0 |
| C9orf142 | -0,649909511 | -0,219196542 | 0 | N.A. | 0 |
| LSM6     | -0,650104166 | -0,532796398 | 0 | N.A. | 0 |
| TUBA1B   | -0,650178047 | -0,488461564 | 0 | N.A. | 0 |
| PDHA1    | -0,650423091 | -0,428165882 | 0 | N.A. | 0 |
| CHCHD3   | -0,650590764 | -0,404790127 | 0 | N.A. | 0 |
| SNRNP70  | -0,65130684  | -0,361153338 | 0 | N.A. | 0 |
| TCP1     | -0,651349089 | -0,459461695 | 0 | N.A. | 0 |
| MPC2     | -0,651473498 | -0,486844095 | 0 | N.A. | 0 |
| EBNA1BP2 | -0,651652407 | -0,371949723 | 0 | N.A. | 0 |
| BOLA3    | -0,652081138 | -0,386437229 | 0 | N.A. | 0 |
| ASCL2    | -0,652281383 | -0,466991125 | 0 | N.A. | 0 |
| BRX1     | -0,652986383 | -0,397738544 | 0 | N.A. | 0 |
| COA6     | -0,653951072 | -0,399376932 | 0 | N.A. | 0 |
| IPO5     | -0,654531384 | -0,303532151 | 0 | N.A. | 0 |
| ACTL6A   | -0,654633054 | -0,283551543 | 0 | N.A. | 0 |
| NDUFA8   | -0,654825406 | -0,338696034 | 0 | N.A. | 0 |
| IMPDH2   | -0,655036031 | -0,532065601 | 0 | N.A. | 0 |
| AGMAT    | -0,655724173 | -0,399302229 | 0 | N.A. | 0 |
| ATP5C1   | -0,65589197  | -0,422948903 | 0 | N.A. | 0 |
| HNRNPU   | -0,656076517 | -0,239011205 | 0 | N.A. | 0 |
| NPM1     | -0,656080288 | -0,677038746 | 0 | N.A. | 0 |
| EIF3I    | -0,657229122 | -0,482444919 | 0 | N.A. | 0 |
| NASP     | -0,657413214 | -0,455329561 | 0 | N.A. | 0 |
| IDH2     | -0,658178119 | -0,366157632 | 0 | N.A. | 0 |
| DUT      | -0,658824029 | -0,533299663 | 0 | N.A. | 0 |
| IMP4     | -0,659104363 | -0,470558968 | 0 | N.A. | 0 |
| CDCA7    | -0,659266625 | -0,326599282 | 0 | N.A. | 0 |
| ANAPC5   | -0,659408161 | -0,136060656 | 0 | N.A. | 0 |

|          |              |              |   |      |   |
|----------|--------------|--------------|---|------|---|
| SNRPD3   | -0,659455057 | -0,549111027 | 0 | N.A. | 0 |
| ZC3H15   | -0,659521284 | -0,164450073 | 0 | N.A. | 0 |
| ILF3     | -0,659878771 | -0,294727578 | 0 | N.A. | 0 |
| CBX1     | -0,661116676 | -0,369742985 | 0 | N.A. | 0 |
| LAGE3    | -0,661914685 | -0,475185599 | 0 | N.A. | 0 |
| TMEM97   | -0,66220468  | -0,239486895 | 0 | N.A. | 0 |
| GCSH     | -0,662345096 | -0,53327441  | 0 | N.A. | 0 |
| NAE1     | -0,66247114  | -0,338033111 | 0 | N.A. | 0 |
| POLR2E   | -0,662642977 | -0,386014668 | 0 | N.A. | 0 |
| METAP2   | -0,662954666 | -0,405590915 | 0 | N.A. | 0 |
| EIF3K    | -0,663849562 | -0,621569455 | 0 | N.A. | 0 |
| ERI3     | -0,66433271  | -0,457250708 | 0 | N.A. | 0 |
| NUDT5    | -0,66457155  | -0,402253979 | 0 | N.A. | 0 |
| AHSA1    | -0,664799055 | -0,527446408 | 0 | N.A. | 0 |
| NUDT1    | -0,664816032 | -0,485425865 | 0 | N.A. | 0 |
| RPA3     | -0,665588327 | -0,533388631 | 0 | N.A. | 0 |
| FABP5    | -0,665659848 | -0,646019737 | 0 | N.A. | 0 |
| CLNS1A   | -0,666586039 | -0,511157942 | 0 | N.A. | 0 |
| NDUFAF4  | -0,666669329 | -0,340667229 | 0 | N.A. | 0 |
| SYNCRIP  | -0,667812511 | -0,213362002 | 0 | N.A. | 0 |
| YBX1     | -0,667865612 | -0,621774441 | 0 | N.A. | 0 |
| COX5A    | -0,667884606 | -0,489945104 | 0 | N.A. | 0 |
| C11orf31 | -0,668459981 | -0,614994097 | 0 | N.A. | 0 |
| RUVBL1   | -0,668539758 | -0,478378865 | 0 | N.A. | 0 |
| FAM96A   | -0,669551738 | -0,491818192 | 0 | N.A. | 0 |
| PPM1G    | -0,669922263 | -0,421631643 | 0 | N.A. | 0 |
| PPIA     | -0,669969946 | -0,566409175 | 0 | N.A. | 0 |
| FBL      | -0,670171548 | -0,546297738 | 0 | N.A. | 0 |
| DNPH1    | -0,670277347 | -0,530071358 | 0 | N.A. | 0 |
| XRCC6    | -0,670713963 | -0,483696913 | 0 | N.A. | 0 |
| HAUS1    | -0,67078066  | -0,334331579 | 0 | N.A. | 0 |
| COPS6    | -0,671193317 | -0,210716032 | 0 | N.A. | 0 |
| CDC123   | -0,671396528 | -0,501029859 | 0 | N.A. | 0 |

|         |              |              |   |      |   |
|---------|--------------|--------------|---|------|---|
| HNRNPDL | -0,671619441 | -0,34753731  | 0 | N.A. | 0 |
| ATP5J2  | -0,671911118 | -0,521405964 | 0 | N.A. | 0 |
| NDUFA2  | -0,673168534 | -0,680913661 | 0 | N.A. | 0 |
| NDUFA10 | -0,673327892 | -0,542198881 | 0 | N.A. | 0 |
| LSM3    | -0,673593497 | -0,517180688 | 0 | N.A. | 0 |
| SIVA1   | -0,673639546 | -0,355374479 | 0 | N.A. | 0 |
| TMA7    | -0,673757463 | -0,56800456  | 0 | N.A. | 0 |
| MCM7    | -0,675058215 | -0,379486691 | 0 | N.A. | 0 |
| MINOS1  | -0,67525984  | -0,431532667 | 0 | N.A. | 0 |
| C1QBP   | -0,675335758 | -0,587997036 | 0 | N.A. | 0 |
| HNRNPK  | -0,675920496 | -0,447323835 | 0 | N.A. | 0 |
| HMG1    | -0,676205093 | -0,547158807 | 0 | N.A. | 0 |
| CKS2    | -0,676717282 | -0,495257721 | 0 | N.A. | 0 |
| ATP5B   | -0,677261872 | -0,411453993 | 0 | N.A. | 0 |
| NDUFB8  | -0,677274015 | -0,313383143 | 0 | N.A. | 0 |
| SNRPA   | -0,677560837 | -0,354711992 | 0 | N.A. | 0 |
| E124    | -0,677659043 | -0,295113569 | 0 | N.A. | 0 |
| NOP58   | -0,677750661 | -0,245747506 | 0 | N.A. | 0 |
| HNRNPF  | -0,678836678 | -0,355555329 | 0 | N.A. | 0 |
| VBP1    | -0,678863969 | -0,457495148 | 0 | N.A. | 0 |
| ATP5G3  | -0,679409361 | -0,502543008 | 0 | N.A. | 0 |
| CACYBP  | -0,679521317 | -0,42832188  | 0 | N.A. | 0 |
| CMSS1   | -0,679558927 | -0,435713654 | 0 | N.A. | 0 |
| ATP5F1  | -0,680025925 | -0,478913289 | 0 | N.A. | 0 |
| ACP1    | -0,680394805 | -0,360938369 | 0 | N.A. | 0 |
| EBPL    | -0,680985444 | -0,361664097 | 0 | N.A. | 0 |
| SUCLG1  | -0,681360557 | -0,503844247 | 0 | N.A. | 0 |
| MDH2    | -0,682251138 | -0,526607062 | 0 | N.A. | 0 |
| NDUFB9  | -0,682318654 | -0,245032618 | 0 | N.A. | 0 |
| NDUFB10 | -0,68269175  | -0,384037016 | 0 | N.A. | 0 |
| NDUFAF2 | -0,683262619 | -0,596352133 | 0 | N.A. | 0 |
| ANP32B  | -0,683439988 | -0,45081593  | 0 | N.A. | 0 |
| HDAC2   | -0,683524627 | -0,260198113 | 0 | N.A. | 0 |



|          |              |              |   |      |   |
|----------|--------------|--------------|---|------|---|
| PRMT1    | -0,683852932 | -0,405039398 | 0 | N.A. | 0 |
| SNRNP25  | -0,684277953 | -0,451615454 | 0 | N.A. | 0 |
| THOC3    | -0,684587048 | -0,392852407 | 0 | N.A. | 0 |
| ESD      | -0,684773451 | -0,453636613 | 0 | N.A. | 0 |
| PTPLAD1  | -0,684843813 | -0,186087455 | 0 | N.A. | 0 |
| WBSCR22  | -0,684874503 | -0,338926149 | 0 | N.A. | 0 |
| NDUFS3   | -0,685056624 | -0,398363569 | 0 | N.A. | 0 |
| ELAVL1   | -0,686410782 | -0,510209233 | 0 | N.A. | 0 |
| C20orf27 | -0,686467594 | -0,485618151 | 0 | N.A. | 0 |
| HNRNPD   | -0,686536952 | -0,179879731 | 0 | N.A. | 0 |
| PTGES3   | -0,687505539 | -0,555746009 | 0 | N.A. | 0 |
| ENSA     | -0,688266206 | -0,467266032 | 0 | N.A. | 0 |
| ANAPC15  | -0,688683268 | -0,490107426 | 0 | N.A. | 0 |
| RNASEH2B | -0,68896221  | -0,575017056 | 0 | N.A. | 0 |
| H2AFY    | -0,689840735 | -0,152192502 | 0 | N.A. | 0 |
| MAGOH    | -0,689936922 | -0,554521416 | 0 | N.A. | 0 |
| LSM4     | -0,690112303 | -0,462978092 | 0 | N.A. | 0 |
| SNRPB    | -0,690463551 | -0,4303832   | 0 | N.A. | 0 |
| NDUFS8   | -0,690719651 | -0,555640508 | 0 | N.A. | 0 |
| NDUFB11  | -0,69097842  | -0,550007696 | 0 | N.A. | 0 |
| SF3B5    | -0,692210525 | -0,562111015 | 0 | N.A. | 0 |
| HNRNPA1  | -0,692238248 | -0,6240058   | 0 | N.A. | 0 |
| ATP5A1   | -0,69245139  | -0,575153885 | 0 | N.A. | 0 |
| CCT5     | -0,693781179 | -0,291821417 | 0 | N.A. | 0 |
| C17orf89 | -0,694014271 | -0,561667695 | 0 | N.A. | 0 |
| BZW2     | -0,69423564  | -0,537479587 | 0 | N.A. | 0 |
| THOC7    | -0,69453769  | -0,37650952  | 0 | N.A. | 0 |
| CCDC34   | -0,69511074  | -0,511367224 | 0 | N.A. | 0 |
| SNRPD2   | -0,695882722 | -0,670715135 | 0 | N.A. | 0 |
| CCT4     | -0,696371783 | -0,337749758 | 0 | N.A. | 0 |
| TRMT112  | -0,696901926 | -0,568890193 | 0 | N.A. | 0 |
| DDX46    | -0,697246686 | -0,496881644 | 0 | N.A. | 0 |
| MDH1     | -0,697335989 | -0,461170479 | 0 | N.A. | 0 |

|         |              |              |   |      |   |
|---------|--------------|--------------|---|------|---|
| ISOC2   | -0,697947417 | -0,534785282 | 0 | N.A. | 0 |
| SRSF1   | -0,698108973 | -0,197032304 | 0 | N.A. | 0 |
| SSBP1   | -0,698274156 | -0,572901593 | 0 | N.A. | 0 |
| NDUFB6  | -0,698823688 | -0,420737471 | 0 | N.A. | 0 |
| PTMA    | -0,700294005 | -0,511898009 | 0 | N.A. | 0 |
| SOD1    | -0,700801408 | -0,464789814 | 0 | N.A. | 0 |
| PPIH    | -0,70128904  | -0,588414933 | 0 | N.A. | 0 |
| DDX18   | -0,701419924 | -0,294705374 | 0 | N.A. | 0 |
| CCT8    | -0,701759478 | -0,480122194 | 0 | N.A. | 0 |
| LDHB    | -0,702396149 | -0,6815864   | 0 | N.A. | 0 |
| NDUFV1  | -0,702473042 | -0,502291658 | 0 | N.A. | 0 |
| RBMX    | -0,704932969 | -0,674892923 | 0 | N.A. | 0 |
| ATP5L   | -0,705372526 | -0,52046835  | 0 | N.A. | 0 |
| AHCY    | -0,70571762  | -0,502971861 | 0 | N.A. | 0 |
| RCN2    | -0,70658727  | -0,482858335 | 0 | N.A. | 0 |
| CCT7    | -0,708423623 | -0,336827834 | 0 | N.A. | 0 |
| RBBP7   | -0,708834991 | -0,282784095 | 0 | N.A. | 0 |
| TMEM261 | -0,70956767  | -0,480737589 | 0 | N.A. | 0 |
| HMGB3   | -0,710508712 | -0,442247246 | 0 | N.A. | 0 |
| STOML2  | -0,710912409 | -0,522437581 | 0 | N.A. | 0 |
| H2AFZ   | -0,711457312 | -0,530999243 | 0 | N.A. | 0 |
| CISD1   | -0,712783468 | -0,295279421 | 0 | N.A. | 0 |
| POLD2   | -0,712985478 | -0,524656486 | 0 | N.A. | 0 |
| NUDCD2  | -0,713130589 | -0,511819623 | 0 | N.A. | 0 |
| TUFM    | -0,713247164 | -0,438516443 | 0 | N.A. | 0 |
| PAICS   | -0,714012401 | -0,517631976 | 0 | N.A. | 0 |
| PSIP1   | -0,714283043 | -0,496017667 | 0 | N.A. | 0 |
| HMG3    | -0,715404767 | -0,613213572 | 0 | N.A. | 0 |
| NUCKS1  | -0,715423635 | -0,398502653 | 0 | N.A. | 0 |
| POLR2G  | -0,716310572 | -0,635633589 | 0 | N.A. | 0 |
| SLIRP   | -0,716478884 | -0,486812725 | 0 | N.A. | 0 |
| H2AFV   | -0,716950973 | -0,480837955 | 0 | N.A. | 0 |
| SRPK1   | -0,717008058 | -0,376271868 | 0 | N.A. | 0 |

|         |              |              |   |      |   |
|---------|--------------|--------------|---|------|---|
| PHB2    | -0,719112057 | -0,5261422   | 0 | N.A. | 0 |
| CYC1    | -0,71940016  | -0,343475399 | 0 | N.A. | 0 |
| SERBP1  | -0,719445194 | -0,436230606 | 0 | N.A. | 0 |
| MTCH2   | -0,721467818 | -0,32397239  | 0 | N.A. | 0 |
| SSRP1   | -0,724587591 | -0,475084634 | 0 | N.A. | 0 |
| PARP1   | -0,725636857 | -0,489602254 | 0 | N.A. | 0 |
| HNRNPR  | -0,726185925 | -0,359638808 | 0 | N.A. | 0 |
| PCBD1   | -0,726620512 | -0,354690647 | 0 | N.A. | 0 |
| STMN1   | -0,72686478  | -0,538304684 | 0 | N.A. | 0 |
| NUDC    | -0,727268589 | -0,480843497 | 0 | N.A. | 0 |
| CCT6A   | -0,727542843 | -0,269900584 | 0 | N.A. | 0 |
| DNAJC19 | -0,727904454 | -0,415475888 | 0 | N.A. | 0 |
| HNRNPM  | -0,728251999 | -0,454080733 | 0 | N.A. | 0 |
| RAN     | -0,72856265  | -0,464172519 | 0 | N.A. | 0 |
| ACAT1   | -0,731056131 | -0,581421214 | 0 | N.A. | 0 |
| LSM5    | -0,731410284 | -0,522978933 | 0 | N.A. | 0 |
| ILF2    | -0,732429701 | -0,473157886 | 0 | N.A. | 0 |
| CDK4    | -0,733404973 | -0,440097002 | 0 | N.A. | 0 |
| NDUFS5  | -0,73362223  | -0,570470259 | 0 | N.A. | 0 |
| PA2G4   | -0,733903117 | -0,528423289 | 0 | N.A. | 0 |
| CBX3    | -0,734817191 | -0,48935375  | 0 | N.A. | 0 |
| SRSF7   | -0,734872213 | -0,458426197 | 0 | N.A. | 0 |
| PRDX2   | -0,736972108 | -0,594971393 | 0 | N.A. | 0 |
| NDUFAB1 | -0,737282519 | -0,482269214 | 0 | N.A. | 0 |
| NME1    | -0,737305142 | -0,536112394 | 0 | N.A. | 0 |
| NPM3    | -0,73807517  | -0,552054545 | 0 | N.A. | 0 |
| RANBP1  | -0,739583333 | -0,564822966 | 0 | N.A. | 0 |
| PARK7   | -0,740271766 | -0,571958046 | 0 | N.A. | 0 |
| SNRPC   | -0,741143947 | -0,641059499 | 0 | N.A. | 0 |
| SNRPD1  | -0,741273328 | -0,592349311 | 0 | N.A. | 0 |
| PDAP1   | -0,741715154 | -0,545779847 | 0 | N.A. | 0 |
| SSB     | -0,742206445 | -0,469790438 | 0 | N.A. | 0 |
| PRDX3   | -0,743405349 | -0,613746647 | 0 | N.A. | 0 |

|           |              |              |   |      |   |
|-----------|--------------|--------------|---|------|---|
| ATP5G1    | -0,745580714 | -0,635405251 | 0 | N.A. | 0 |
| PHB       | -0,745808122 | -0,532654323 | 0 | N.A. | 0 |
| CCT3      | -0,745871543 | -0,473839278 | 0 | N.A. | 0 |
| HMG2      | -0,747239046 | -0,624312408 | 0 | N.A. | 0 |
| HSPA8     | -0,747369292 | -0,485164269 | 0 | N.A. | 0 |
| SRP9      | -0,749590407 | -0,598496473 | 0 | N.A. | 0 |
| ERH       | -0,74971316  | -0,493705847 | 0 | N.A. | 0 |
| DKC1      | -0,750377121 | -0,381445786 | 0 | N.A. | 0 |
| CCT2      | -0,75067246  | -0,373368388 | 0 | N.A. | 0 |
| PSMG1     | -0,751312062 | -0,474856575 | 0 | N.A. | 0 |
| HSP90AB1  | -0,75157825  | -0,501965769 | 0 | N.A. | 0 |
| HSPD1     | -0,754075008 | -0,579130767 | 0 | N.A. | 0 |
| HNRNPA2B1 | -0,755410177 | -0,48512672  | 0 | N.A. | 0 |
| HSD17B10  | -0,756854631 | -0,44479559  | 0 | N.A. | 0 |
| NDUFS6    | -0,757718302 | -0,415012291 | 0 | N.A. | 0 |
| EEF1E1    | -0,760389823 | -0,487870701 | 0 | N.A. | 0 |
| DCTPP1    | -0,761896286 | -0,36212896  | 0 | N.A. | 0 |
| BANF1     | -0,762570869 | -0,629397181 | 0 | N.A. | 0 |
| NHP2      | -0,76739723  | -0,618069919 | 0 | N.A. | 0 |
| HNRNPA3   | -0,768296729 | -0,559737389 | 0 | N.A. | 0 |
| LSM2      | -0,771096667 | -0,638277336 | 0 | N.A. | 0 |
| NCL       | -0,771770742 | -0,529410481 | 0 | N.A. | 0 |
| SRSF3     | -0,772824956 | -0,538410593 | 0 | N.A. | 0 |
| HMGB1     | -0,780648561 | -0,502585688 | 0 | N.A. | 0 |
| GGCT      | -0,7817603   | -0,506587063 | 0 | N.A. | 0 |
| PEBP1     | -0,784250936 | -0,69111521  | 0 | N.A. | 0 |
| SNRPE     | -0,789133493 | -0,625695256 | 0 | N.A. | 0 |
| SNRPF     | -0,794191165 | -0,597826167 | 0 | N.A. | 0 |
| LSM7      | -0,797421998 | -0,567592616 | 0 | N.A. | 0 |
| HSPE1     | -0,801245001 | -0,624661373 | 0 | N.A. | 0 |
| TIMM13    | -0,80305769  | -0,567037898 | 0 | N.A. | 0 |
| A2M-AS1   |              | 0,158513394  | 0 | N.A. | 0 |
| A4GNT     |              |              | 0 | N.A. | 0 |

|                    |  |              |   |      |   |
|--------------------|--|--------------|---|------|---|
| AADACL2            |  |              | 0 | N.A. | 0 |
| AADACL2-AS1        |  |              | 0 | N.A. | 0 |
| AANAT              |  |              | 0 | N.A. | 0 |
| AARD               |  |              | 0 | N.A. | 0 |
| ABC12-49244600F4.4 |  |              | 0 | N.A. | 0 |
| ABCA4              |  |              | 0 | N.A. | 0 |
| ABCA6              |  | 0,122251418  | 0 | N.A. | 0 |
| ABCA9              |  | 0,159834853  | 0 | N.A. | 0 |
| ABCB5              |  |              | 0 | N.A. | 0 |
| ABCC11             |  | 0,248761503  | 0 | N.A. | 0 |
| ABCC12             |  |              | 0 | N.A. | 0 |
| ABCC9              |  |              | 0 | N.A. | 0 |
| ABCD2              |  | -0,088758096 | 0 | N.A. | 0 |
| ABCG4              |  |              | 0 | N.A. | 0 |
| ABHD14A-ACY1       |  | -0,333224209 | 0 | N.A. | 0 |
| ABHD15-AS1         |  |              | 0 | N.A. | 0 |
| ABHD16B            |  |              | 0 | N.A. | 0 |
| ABRA               |  |              | 0 | N.A. | 0 |
| AC000032.2         |  |              | 0 | N.A. | 0 |
| AC000067.1         |  |              | 0 | N.A. | 0 |
| AC000068.10        |  | 0,067349196  | 0 | N.A. | 0 |
| AC000068.9         |  | 0,162763704  | 0 | N.A. | 0 |
| AC002064.5         |  |              | 0 | N.A. | 0 |
| AC002066.1         |  |              | 0 | N.A. | 0 |
| AC002365.5         |  |              | 0 | N.A. | 0 |
| AC002398.12        |  | 0,008985307  | 0 | N.A. | 0 |
| AC002398.13        |  |              | 0 | N.A. | 0 |
| AC002456.2         |  |              | 0 | N.A. | 0 |
| AC002463.3         |  |              | 0 | N.A. | 0 |
| AC002480.2         |  |              | 0 | N.A. | 0 |
| AC002480.3         |  | 0,044112527  | 0 | N.A. | 0 |
| AC002480.4         |  |              | 0 | N.A. | 0 |
| AC002511.2         |  |              | 0 | N.A. | 0 |

|             |  |              |   |      |   |
|-------------|--|--------------|---|------|---|
| AC002511.3  |  |              | 0 | N.A. | 0 |
| AC002550.5  |  | -0,115437591 | 0 | N.A. | 0 |
| AC003005.2  |  |              | 0 | N.A. | 0 |
| AC003006.7  |  |              | 0 | N.A. | 0 |
| AC003088.1  |  |              | 0 | N.A. | 0 |
| AC003090.1  |  |              | 0 | N.A. | 0 |
| AC003101.1  |  |              | 0 | N.A. | 0 |
| AC003986.6  |  |              | 0 | N.A. | 0 |
| AC003986.7  |  |              | 0 | N.A. | 0 |
| AC004066.3  |  |              | 0 | N.A. | 0 |
| AC004067.5  |  |              | 0 | N.A. | 0 |
| AC004158.1  |  |              | 0 | N.A. | 0 |
| AC004160.4  |  |              | 0 | N.A. | 0 |
| AC004221.2  |  |              | 0 | N.A. | 0 |
| AC004237.1  |  |              | 0 | N.A. | 0 |
| AC004381.7  |  | -0,112500357 | 0 | N.A. | 0 |
| AC004448.5  |  |              | 0 | N.A. | 0 |
| AC004471.10 |  |              | 0 | N.A. | 0 |
| AC004490.1  |  | 0,220585316  | 0 | N.A. | 0 |
| AC004593.3  |  | 0,06761821   | 0 | N.A. | 0 |
| AC004691.5  |  |              | 0 | N.A. | 0 |
| AC004775.5  |  |              | 0 | N.A. | 0 |
| AC004824.2  |  |              | 0 | N.A. | 0 |
| AC004837.5  |  | 0,207835211  | 0 | N.A. | 0 |
| AC004878.8  |  |              | 0 | N.A. | 0 |
| AC004906.3  |  |              | 0 | N.A. | 0 |
| AC004941.3  |  |              | 0 | N.A. | 0 |
| AC004947.2  |  |              | 0 | N.A. | 0 |
| AC004988.1  |  |              | 0 | N.A. | 0 |
| AC005009.1  |  |              | 0 | N.A. | 0 |
| AC005009.2  |  | 0,115490784  | 0 | N.A. | 0 |
| AC005013.5  |  |              | 0 | N.A. | 0 |
| AC005019.3  |  |              | 0 | N.A. | 0 |

|             |  |              |   |      |   |
|-------------|--|--------------|---|------|---|
| AC005042.4  |  |              | 0 | N.A. | 0 |
| AC005082.12 |  |              | 0 | N.A. | 0 |
| AC005197.2  |  |              | 0 | N.A. | 0 |
| AC005220.3  |  |              | 0 | N.A. | 0 |
| AC005237.4  |  | -0,037118778 | 0 | N.A. | 0 |
| AC005253.4  |  |              | 0 | N.A. | 0 |
| AC005276.1  |  | -0,012598741 | 0 | N.A. | 0 |
| AC005281.2  |  | 0,061598112  | 0 | N.A. | 0 |
| AC005304.1  |  |              | 0 | N.A. | 0 |
| AC005307.3  |  | -0,247619467 | 0 | N.A. | 0 |
| AC005324.6  |  | 0,298278559  | 0 | N.A. | 0 |
| AC005355.1  |  |              | 0 | N.A. | 0 |
| AC005477.1  |  | 0,142827328  | 0 | N.A. | 0 |
| AC005498.3  |  |              | 0 | N.A. | 0 |
| AC005498.4  |  |              | 0 | N.A. | 0 |
| AC005522.7  |  | 0,162512936  | 0 | N.A. | 0 |
| AC005540.3  |  | 0,385453666  | 0 | N.A. | 0 |
| AC005546.2  |  |              | 0 | N.A. | 0 |
| AC005592.1  |  |              | 0 | N.A. | 0 |
| AC005592.3  |  |              | 0 | N.A. | 0 |
| AC005606.14 |  |              | 0 | N.A. | 0 |
| AC005606.15 |  |              | 0 | N.A. | 0 |
| AC005609.16 |  |              | 0 | N.A. | 0 |
| AC005616.2  |  |              | 0 | N.A. | 0 |
| AC005624.2  |  | -0,091396266 | 0 | N.A. | 0 |
| AC005625.1  |  |              | 0 | N.A. | 0 |
| AC005703.3  |  |              | 0 | N.A. | 0 |
| AC005754.8  |  |              | 0 | N.A. | 0 |
| AC005932.1  |  |              | 0 | N.A. | 0 |
| AC006007.1  |  |              | 0 | N.A. | 0 |
| AC006042.6  |  |              | 0 | N.A. | 0 |
| AC006126.3  |  | -0,002001467 | 0 | N.A. | 0 |
| AC006126.4  |  |              | 0 | N.A. | 0 |

|             |  |  |              |      |      |   |
|-------------|--|--|--------------|------|------|---|
| AC006129.1  |  |  | 0            | N.A. | 0    |   |
| AC006159.4  |  |  | 0,387970496  | 0    | N.A. | 0 |
| AC006160.5  |  |  | -0,027206994 | 0    | N.A. | 0 |
| AC006369.2  |  |  | 0,133790052  | 0    | N.A. | 0 |
| AC006372.4  |  |  |              | 0    | N.A. | 0 |
| AC006372.5  |  |  |              | 0    | N.A. | 0 |
| AC006449.2  |  |  |              | 0    | N.A. | 0 |
| AC006460.2  |  |  | 0,312475542  | 0    | N.A. | 0 |
| AC006482.1  |  |  |              | 0    | N.A. | 0 |
| AC006547.8  |  |  | -0,03847024  | 0    | N.A. | 0 |
| AC006946.15 |  |  |              | 0    | N.A. | 0 |
| AC006946.16 |  |  |              | 0    | N.A. | 0 |
| AC007040.6  |  |  |              | 0    | N.A. | 0 |
| AC007040.8  |  |  |              | 0    | N.A. | 0 |
| AC007050.17 |  |  |              | 0    | N.A. | 0 |
| AC007064.24 |  |  | -0,097864271 | 0    | N.A. | 0 |
| AC007126.1  |  |  | 0,04418319   | 0    | N.A. | 0 |
| AC007161.5  |  |  |              | 0    | N.A. | 0 |
| AC007163.6  |  |  |              | 0    | N.A. | 0 |
| AC007192.6  |  |  |              | 0    | N.A. | 0 |
| AC007193.8  |  |  |              | 0    | N.A. | 0 |
| AC007193.9  |  |  |              | 0    | N.A. | 0 |
| AC007285.6  |  |  | -0,146684907 | 0    | N.A. | 0 |
| AC007292.4  |  |  |              | 0    | N.A. | 0 |
| AC007319.1  |  |  | -0,13826328  | 0    | N.A. | 0 |
| AC007325.1  |  |  |              | 0    | N.A. | 0 |
| AC007349.5  |  |  |              | 0    | N.A. | 0 |
| AC007349.7  |  |  |              | 0    | N.A. | 0 |
| AC007362.3  |  |  |              | 0    | N.A. | 0 |
| AC007364.1  |  |  |              | 0    | N.A. | 0 |
| AC007365.1  |  |  | -0,072964582 | 0    | N.A. | 0 |
| AC007365.3  |  |  |              | 0    | N.A. | 0 |
| AC007381.2  |  |  |              | 0    | N.A. | 0 |



|             |  |              |   |      |   |
|-------------|--|--------------|---|------|---|
| AC007381.3  |  |              | 0 | N.A. | 0 |
| AC007386.2  |  |              | 0 | N.A. | 0 |
| AC007389.3  |  |              | 0 | N.A. | 0 |
| AC007391.2  |  |              | 0 | N.A. | 0 |
| AC007403.2  |  |              | 0 | N.A. | 0 |
| AC007405.4  |  | -0,007659978 | 0 | N.A. | 0 |
| AC007405.8  |  |              | 0 | N.A. | 0 |
| AC007422.1  |  | 0,034357583  | 0 | N.A. | 0 |
| AC007556.3  |  | 0,306251413  | 0 | N.A. | 0 |
| AC007563.5  |  |              | 0 | N.A. | 0 |
| AC007566.10 |  |              | 0 | N.A. | 0 |
| AC007743.1  |  |              | 0 | N.A. | 0 |
| AC007750.5  |  |              | 0 | N.A. | 0 |
| AC007879.4  |  |              | 0 | N.A. | 0 |
| AC007879.5  |  |              | 0 | N.A. | 0 |
| AC007879.7  |  |              | 0 | N.A. | 0 |
| AC007880.1  |  |              | 0 | N.A. | 0 |
| AC007906.1  |  |              | 0 | N.A. | 0 |
| AC007950.1  |  | 0,256570298  | 0 | N.A. | 0 |
| AC008063.2  |  |              | 0 | N.A. | 0 |
| AC008063.3  |  | 0,263327843  | 0 | N.A. | 0 |
| AC008067.2  |  |              | 0 | N.A. | 0 |
| AC008073.9  |  |              | 0 | N.A. | 0 |
| AC008074.1  |  | 0,124445685  | 0 | N.A. | 0 |
| AC008088.4  |  |              | 0 | N.A. | 0 |
| AC008268.1  |  |              | 0 | N.A. | 0 |
| AC008269.2  |  |              | 0 | N.A. | 0 |
| AC008277.1  |  |              | 0 | N.A. | 0 |
| AC008440.5  |  |              | 0 | N.A. | 0 |
| AC008592.8  |  | 0,266713809  | 0 | N.A. | 0 |
| AC008697.1  |  |              | 0 | N.A. | 0 |
| AC008746.3  |  |              | 0 | N.A. | 0 |
| AC008937.2  |  |              | 0 | N.A. | 0 |

|             |  |              |   |      |   |
|-------------|--|--------------|---|------|---|
| AC008937.3  |  |              | 0 | N.A. | 0 |
| AC009065.4  |  | 0,092205615  | 0 | N.A. | 0 |
| AC009120.4  |  |              | 0 | N.A. | 0 |
| AC009120.5  |  | 0,154617352  | 0 | N.A. | 0 |
| AC009133.17 |  | 0,250858065  | 0 | N.A. | 0 |
| AC009227.2  |  |              | 0 | N.A. | 0 |
| AC009228.1  |  | 0,014959771  | 0 | N.A. | 0 |
| AC009229.5  |  |              | 0 | N.A. | 0 |
| AC009262.2  |  |              | 0 | N.A. | 0 |
| AC009276.4  |  |              | 0 | N.A. | 0 |
| AC009299.2  |  | 0,074697101  | 0 | N.A. | 0 |
| AC009303.1  |  |              | 0 | N.A. | 0 |
| AC009336.19 |  |              | 0 | N.A. | 0 |
| AC009495.4  |  | -0,225163244 | 0 | N.A. | 0 |
| AC009502.4  |  | 0,081790301  | 0 | N.A. | 0 |
| AC009505.2  |  |              | 0 | N.A. | 0 |
| AC009518.4  |  |              | 0 | N.A. | 0 |
| AC009542.2  |  |              | 0 | N.A. | 0 |
| AC009784.3  |  |              | 0 | N.A. | 0 |
| AC010084.1  |  |              | 0 | N.A. | 0 |
| AC010136.2  |  |              | 0 | N.A. | 0 |
| AC010504.2  |  | 0,261199982  | 0 | N.A. | 0 |
| AC010524.4  |  |              | 0 | N.A. | 0 |
| AC010547.9  |  |              | 0 | N.A. | 0 |
| AC010649.1  |  |              | 0 | N.A. | 0 |
| AC010746.3  |  |              | 0 | N.A. | 0 |
| AC010761.13 |  |              | 0 | N.A. | 0 |
| AC010761.6  |  |              | 0 | N.A. | 0 |
| AC010761.9  |  |              | 0 | N.A. | 0 |
| AC010884.1  |  |              | 0 | N.A. | 0 |
| AC010890.1  |  |              | 0 | N.A. | 0 |
| AC010894.5  |  |              | 0 | N.A. | 0 |
| AC010976.2  |  |              | 0 | N.A. | 0 |

|             |  |              |   |      |   |
|-------------|--|--------------|---|------|---|
| AC010987.6  |  |              | 0 | N.A. | 0 |
| AC011247.3  |  |              | 0 | N.A. | 0 |
| AC011290.4  |  |              | 0 | N.A. | 0 |
| AC011294.3  |  |              | 0 | N.A. | 0 |
| AC011738.4  |  |              | 0 | N.A. | 0 |
| AC011747.6  |  |              | 0 | N.A. | 0 |
| AC011893.3  |  |              | 0 | N.A. | 0 |
| AC011899.9  |  |              | 0 | N.A. | 0 |
| AC012123.1  |  |              | 0 | N.A. | 0 |
| AC012314.8  |  | 0,099828457  | 0 | N.A. | 0 |
| AC012358.7  |  |              | 0 | N.A. | 0 |
| AC012442.6  |  |              | 0 | N.A. | 0 |
| AC012462.2  |  |              | 0 | N.A. | 0 |
| AC012494.1  |  |              | 0 | N.A. | 0 |
| AC012531.25 |  |              | 0 | N.A. | 0 |
| AC012593.1  |  |              | 0 | N.A. | 0 |
| AC012613.2  |  | 0,228744416  | 0 | N.A. | 0 |
| AC012668.2  |  |              | 0 | N.A. | 0 |
| AC013264.2  |  |              | 0 | N.A. | 0 |
| AC013275.2  |  | -0,261803509 | 0 | N.A. | 0 |
| AC015688.3  |  |              | 0 | N.A. | 0 |
| AC015691.13 |  | 0,250250155  | 0 | N.A. | 0 |
| AC015849.12 |  |              | 0 | N.A. | 0 |
| AC015849.19 |  |              | 0 | N.A. | 0 |
| AC015849.2  |  | 0,053083561  | 0 | N.A. | 0 |
| AC015922.6  |  |              | 0 | N.A. | 0 |
| AC015933.2  |  |              | 0 | N.A. | 0 |
| AC015936.3  |  |              | 0 | N.A. | 0 |
| AC015969.3  |  | 0,18184655   | 0 | N.A. | 0 |
| AC016629.3  |  |              | 0 | N.A. | 0 |
| AC016683.5  |  |              | 0 | N.A. | 0 |
| AC016700.2  |  |              | 0 | N.A. | 0 |
| AC016722.3  |  | 0,193210016  | 0 | N.A. | 0 |

|             |  |              |   |      |   |
|-------------|--|--------------|---|------|---|
| AC016722.4  |  |              | 0 | N.A. | 0 |
| AC016723.4  |  |              | 0 | N.A. | 0 |
| AC016735.1  |  | -0,065957726 | 0 | N.A. | 0 |
| AC016738.3  |  |              | 0 | N.A. | 0 |
| AC016745.3  |  | -0,146865157 | 0 | N.A. | 0 |
| AC016768.1  |  |              | 0 | N.A. | 0 |
| AC016907.3  |  |              | 0 | N.A. | 0 |
| AC016910.1  |  |              | 0 | N.A. | 0 |
| AC016912.3  |  |              | 0 | N.A. | 0 |
| AC016995.3  |  |              | 0 | N.A. | 0 |
| AC016999.2  |  | 0,213993898  | 0 | N.A. | 0 |
| AC017028.10 |  |              | 0 | N.A. | 0 |
| AC017060.1  |  | 0,373902596  | 0 | N.A. | 0 |
| AC017101.10 |  |              | 0 | N.A. | 0 |
| AC017104.2  |  |              | 0 | N.A. | 0 |
| AC018462.2  |  | 0,361909903  | 0 | N.A. | 0 |
| AC018464.3  |  |              | 0 | N.A. | 0 |
| AC018647.3  |  |              | 0 | N.A. | 0 |
| AC018766.4  |  |              | 0 | N.A. | 0 |
| AC018766.6  |  |              | 0 | N.A. | 0 |
| AC018878.3  |  |              | 0 | N.A. | 0 |
| AC019100.3  |  | 0,317484497  | 0 | N.A. | 0 |
| AC019172.2  |  |              | 0 | N.A. | 0 |
| AC019206.1  |  |              | 0 | N.A. | 0 |
| AC020594.5  |  | 0,075163742  | 0 | N.A. | 0 |
| AC020743.2  |  |              | 0 | N.A. | 0 |
| AC020956.3  |  |              | 0 | N.A. | 0 |
| AC021188.4  |  |              | 0 | N.A. | 0 |
| AC022154.7  |  | -0,146865157 | 0 | N.A. | 0 |
| AC022431.2  |  |              | 0 | N.A. | 0 |
| AC022816.2  |  |              | 0 | N.A. | 0 |
| AC023115.2  |  |              | 0 | N.A. | 0 |
| AC023347.1  |  | 0,035187887  | 0 | N.A. | 0 |

|             |  |              |   |      |   |
|-------------|--|--------------|---|------|---|
| AC024084.1  |  |              | 0 | N.A. | 0 |
| AC024704.2  |  |              | 0 | N.A. | 0 |
| AC026150.8  |  |              | 0 | N.A. | 0 |
| AC026167.1  |  |              | 0 | N.A. | 0 |
| AC026904.1  |  |              | 0 | N.A. | 0 |
| AC027119.1  |  |              | 0 | N.A. | 0 |
| AC027601.1  |  | -0,030411141 | 0 | N.A. | 0 |
| AC034187.2  |  |              | 0 | N.A. | 0 |
| AC055764.1  |  |              | 0 | N.A. | 0 |
| AC061961.2  |  | 0,174463626  | 0 | N.A. | 0 |
| AC062028.1  |  | 0,183547058  | 0 | N.A. | 0 |
| AC064834.2  |  |              | 0 | N.A. | 0 |
| AC064834.3  |  |              | 0 | N.A. | 0 |
| AC067945.2  |  |              | 0 | N.A. | 0 |
| AC067959.1  |  | 0,185622821  | 0 | N.A. | 0 |
| AC068196.1  |  |              | 0 | N.A. | 0 |
| AC068491.2  |  |              | 0 | N.A. | 0 |
| AC068492.1  |  | 0,343588128  | 0 | N.A. | 0 |
| AC068533.7  |  |              | 0 | N.A. | 0 |
| AC068580.6  |  |              | 0 | N.A. | 0 |
| AC068580.7  |  | 0,268151694  | 0 | N.A. | 0 |
| AC068831.15 |  |              | 0 | N.A. | 0 |
| AC068831.3  |  | -0,099218049 | 0 | N.A. | 0 |
| AC068831.6  |  |              | 0 | N.A. | 0 |
| AC069368.3  |  |              | 0 | N.A. | 0 |
| AC073072.5  |  |              | 0 | N.A. | 0 |
| AC073107.1  |  | -0,07971405  | 0 | N.A. | 0 |
| AC073115.6  |  |              | 0 | N.A. | 0 |
| AC073115.7  |  |              | 0 | N.A. | 0 |
| AC073130.3  |  |              | 0 | N.A. | 0 |
| AC073133.1  |  | -0,055489061 | 0 | N.A. | 0 |
| AC073133.2  |  | -0,078135637 | 0 | N.A. | 0 |
| AC073254.1  |  | 0,203166009  | 0 | N.A. | 0 |

|             |  |              |   |      |   |
|-------------|--|--------------|---|------|---|
| AC073316.1  |  |              | 0 | N.A. | 0 |
| AC073316.2  |  |              | 0 | N.A. | 0 |
| AC073333.8  |  |              | 0 | N.A. | 0 |
| AC073342.12 |  |              | 0 | N.A. | 0 |
| AC073343.13 |  |              | 0 | N.A. | 0 |
| AC073641.2  |  |              | 0 | N.A. | 0 |
| AC073657.1  |  | -0,060508802 | 0 | N.A. | 0 |
| AC073834.3  |  | -0,057629436 | 0 | N.A. | 0 |
| AC073842.19 |  | 0,099674316  | 0 | N.A. | 0 |
| AC073934.6  |  | 0,17457869   | 0 | N.A. | 0 |
| AC073957.15 |  |              | 0 | N.A. | 0 |
| AC074363.1  |  | 0,267566087  | 0 | N.A. | 0 |
| AC074366.3  |  |              | 0 | N.A. | 0 |
| AC074391.1  |  | 0,178139772  | 0 | N.A. | 0 |
| AC078941.1  |  |              | 0 | N.A. | 0 |
| AC079135.1  |  |              | 0 | N.A. | 0 |
| AC079145.4  |  |              | 0 | N.A. | 0 |
| AC079354.3  |  |              | 0 | N.A. | 0 |
| AC079610.2  |  |              | 0 | N.A. | 0 |
| AC079630.4  |  |              | 0 | N.A. | 0 |
| AC079742.4  |  |              | 0 | N.A. | 0 |
| AC079767.4  |  |              | 0 | N.A. | 0 |
| AC079776.3  |  |              | 0 | N.A. | 0 |
| AC079988.3  |  |              | 0 | N.A. | 0 |
| AC083949.1  |  | -0,246901544 | 0 | N.A. | 0 |
| AC084082.3  |  |              | 0 | N.A. | 0 |
| AC087430.1  |  |              | 0 | N.A. | 0 |
| AC087491.2  |  | 0,096295576  | 0 | N.A. | 0 |
| AC087499.10 |  |              | 0 | N.A. | 0 |
| AC090154.1  |  | 0,051086021  | 0 | N.A. | 0 |
| AC090505.4  |  |              | 0 | N.A. | 0 |
| AC090617.1  |  |              | 0 | N.A. | 0 |
| AC090627.1  |  | 0,027024748  | 0 | N.A. | 0 |

|             |  |              |   |      |   |
|-------------|--|--------------|---|------|---|
| AC090952.5  |  |              | 0 | N.A. | 0 |
| AC091132.1  |  |              | 0 | N.A. | 0 |
| AC091133.1  |  |              | 0 | N.A. | 0 |
| AC091153.4  |  |              | 0 | N.A. | 0 |
| AC091199.1  |  |              | 0 | N.A. | 0 |
| AC091493.2  |  |              | 0 | N.A. | 0 |
| AC091633.3  |  |              | 0 | N.A. | 0 |
| AC091814.3  |  |              | 0 | N.A. | 0 |
| AC091878.1  |  |              | 0 | N.A. | 0 |
| AC092159.2  |  | -0,073585913 | 0 | N.A. | 0 |
| AC092162.1  |  |              | 0 | N.A. | 0 |
| AC092198.1  |  |              | 0 | N.A. | 0 |
| AC092535.3  |  |              | 0 | N.A. | 0 |
| AC092580.3  |  |              | 0 | N.A. | 0 |
| AC092614.2  |  | 0,047567521  | 0 | N.A. | 0 |
| AC092620.3  |  | 0,05933785   | 0 | N.A. | 0 |
| AC092652.1  |  |              | 0 | N.A. | 0 |
| AC092667.2  |  |              | 0 | N.A. | 0 |
| AC092675.3  |  |              | 0 | N.A. | 0 |
| AC092839.3  |  |              | 0 | N.A. | 0 |
| AC092839.4  |  |              | 0 | N.A. | 0 |
| AC092881.1  |  | 0,078294522  | 0 | N.A. | 0 |
| AC093110.3  |  | -0,264570892 | 0 | N.A. | 0 |
| AC093390.1  |  |              | 0 | N.A. | 0 |
| AC093627.7  |  |              | 0 | N.A. | 0 |
| AC093690.1  |  |              | 0 | N.A. | 0 |
| AC093702.1  |  |              | 0 | N.A. | 0 |
| AC093802.1  |  | 0,011169857  | 0 | N.A. | 0 |
| AC093850.2  |  |              | 0 | N.A. | 0 |
| AC096558.1  |  |              | 0 | N.A. | 0 |
| AC096559.1  |  | 0,10156583   | 0 | N.A. | 0 |
| AC096579.13 |  | 0,291319028  | 0 | N.A. | 0 |
| AC096649.2  |  |              | 0 | N.A. | 0 |

|            |  |              |   |      |   |
|------------|--|--------------|---|------|---|
| AC097381.1 |  |              | 0 | N.A. | 0 |
| AC097467.2 |  |              | 0 | N.A. | 0 |
| AC097495.2 |  |              | 0 | N.A. | 0 |
| AC097713.4 |  |              | 0 | N.A. | 0 |
| AC098617.1 |  |              | 0 | N.A. | 0 |
| AC098820.2 |  |              | 0 | N.A. | 0 |
| AC098820.4 |  | 0,210001999  | 0 | N.A. | 0 |
| AC098823.3 |  |              | 0 | N.A. | 0 |
| AC098828.2 |  | -0,1084766   | 0 | N.A. | 0 |
| AC098973.2 |  | -0,110654708 | 0 | N.A. | 0 |
| AC099342.1 |  | 0,38822783   | 0 | N.A. | 0 |
| AC099344.3 |  | -0,024594426 | 0 | N.A. | 0 |
| AC100830.5 |  | 0,078294522  | 0 | N.A. | 0 |
| AC102953.4 |  |              | 0 | N.A. | 0 |
| AC103563.8 |  |              | 0 | N.A. | 0 |
| AC104024.1 |  |              | 0 | N.A. | 0 |
| AC104024.2 |  |              | 0 | N.A. | 0 |
| AC104076.3 |  |              | 0 | N.A. | 0 |
| AC104088.1 |  | 0,110177933  | 0 | N.A. | 0 |
| AC104134.2 |  | 0,015859071  | 0 | N.A. | 0 |
| AC104135.2 |  |              | 0 | N.A. | 0 |
| AC104653.1 |  | 0,0768443    | 0 | N.A. | 0 |
| AC104655.3 |  | -0,148988748 | 0 | N.A. | 0 |
| AC104699.1 |  |              | 0 | N.A. | 0 |
| AC104809.3 |  |              | 0 | N.A. | 0 |
| AC105339.1 |  | 0,010413208  | 0 | N.A. | 0 |
| AC105402.4 |  |              | 0 | N.A. | 0 |
| AC105760.3 |  | -0,031131404 | 0 | N.A. | 0 |
| AC106053.1 |  |              | 0 | N.A. | 0 |
| AC106786.1 |  |              | 0 | N.A. | 0 |
| AC106869.2 |  | -0,06119256  | 0 | N.A. | 0 |
| AC106873.4 |  | -0,087091051 | 0 | N.A. | 0 |
| AC107218.3 |  |              | 0 | N.A. | 0 |



|             |  |              |   |      |   |
|-------------|--|--------------|---|------|---|
| AC108004.2  |  | -0,025234084 | 0 | N.A. | 0 |
| AC108868.5  |  |              | 0 | N.A. | 0 |
| AC108938.5  |  | 0,057929071  | 0 | N.A. | 0 |
| AC109333.10 |  |              | 0 | N.A. | 0 |
| AC109642.1  |  |              | 0 | N.A. | 0 |
| AC109826.1  |  | 0,253520133  | 0 | N.A. | 0 |
| AC109829.1  |  |              | 0 | N.A. | 0 |
| AC110615.1  |  |              | 0 | N.A. | 0 |
| AC110769.3  |  |              | 0 | N.A. | 0 |
| AC110781.3  |  | -0,015294075 | 0 | N.A. | 0 |
| AC112715.2  |  |              | 0 | N.A. | 0 |
| AC112721.1  |  |              | 0 | N.A. | 0 |
| AC112721.2  |  |              | 0 | N.A. | 0 |
| AC114730.2  |  |              | 0 | N.A. | 0 |
| AC114730.5  |  |              | 0 | N.A. | 0 |
| AC114730.7  |  | -0,030121414 | 0 | N.A. | 0 |
| AC114730.8  |  |              | 0 | N.A. | 0 |
| AC116035.1  |  |              | 0 | N.A. | 0 |
| AC116614.1  |  |              | 0 | N.A. | 0 |
| AC124944.5  |  |              | 0 | N.A. | 0 |
| AC128709.4  |  | 0,175318394  | 0 | N.A. | 0 |
| AC129492.1  |  |              | 0 | N.A. | 0 |
| AC130469.2  |  | -0,054183333 | 0 | N.A. | 0 |
| AC131056.5  |  | 0,269706999  | 0 | N.A. | 0 |
| AC131263.1  |  | 0,257589351  | 0 | N.A. | 0 |
| AC133106.2  |  |              | 0 | N.A. | 0 |
| AC135178.7  |  |              | 0 | N.A. | 0 |
| AC136352.5  |  | 0,182242331  | 0 | N.A. | 0 |
| AC137723.5  |  | 0,040030622  | 0 | N.A. | 0 |
| AC137932.5  |  |              | 0 | N.A. | 0 |
| AC137932.6  |  |              | 0 | N.A. | 0 |
| AC138035.2  |  | -0,060819826 | 0 | N.A. | 0 |
| AC139099.4  |  |              | 0 | N.A. | 0 |

|            |  |              |   |      |   |
|------------|--|--------------|---|------|---|
| AC139099.5 |  |              | 0 | N.A. | 0 |
| AC139100.3 |  |              | 0 | N.A. | 0 |
| AC139887.4 |  | -0,156149809 | 0 | N.A. | 0 |
| AC141272.1 |  |              | 0 | N.A. | 0 |
| AC141928.1 |  | -0,026153694 | 0 | N.A. | 0 |
| AC144836.1 |  |              | 0 | N.A. | 0 |
| AC147651.4 |  | 0,065744066  | 0 | N.A. | 0 |
| AC147651.5 |  |              | 0 | N.A. | 0 |
| AC159540.2 |  |              | 0 | N.A. | 0 |
| AC195454.1 |  |              | 0 | N.A. | 0 |
| AC233755.1 |  |              | 0 | N.A. | 0 |
| AC233755.2 |  |              | 0 | N.A. | 0 |
| AC244230.1 |  | 0,228287442  | 0 | N.A. | 0 |
| ACADL      |  |              | 0 | N.A. | 0 |
| ACBD7      |  | -0,140249552 | 0 | N.A. | 0 |
| ACER1      |  |              | 0 | N.A. | 0 |
| ACMSD      |  |              | 0 | N.A. | 0 |
| ACOT1      |  | 0,221215571  | 0 | N.A. | 0 |
| ACOT12     |  | -0,093160418 | 0 | N.A. | 0 |
| ACSBG1     |  |              | 0 | N.A. | 0 |
| ACSBG2     |  |              | 0 | N.A. | 0 |
| ACSM2A     |  |              | 0 | N.A. | 0 |
| ACSM2B     |  |              | 0 | N.A. | 0 |
| ACSM5      |  | 0,085086587  | 0 | N.A. | 0 |
| ACSM6      |  |              | 0 | N.A. | 0 |
| ACTA2-AS1  |  | -0,012360889 | 0 | N.A. | 0 |
| ACTC1      |  | -0,016227897 | 0 | N.A. | 0 |
| ACTL6B     |  |              | 0 | N.A. | 0 |
| ACTL7A     |  | -0,014083432 | 0 | N.A. | 0 |
| ACTL7B     |  |              | 0 | N.A. | 0 |
| ACTN3      |  |              | 0 | N.A. | 0 |
| AD000091.2 |  |              | 0 | N.A. | 0 |
| AD000671.6 |  |              | 0 | N.A. | 0 |

|             |  |              |   |      |   |
|-------------|--|--------------|---|------|---|
| AD001527.7  |  |              | 0 | N.A. | 0 |
| ADAM11      |  |              | 0 | N.A. | 0 |
| ADAM20      |  | 0,09629621   | 0 | N.A. | 0 |
| ADAM21      |  |              | 0 | N.A. | 0 |
| ADAM23      |  |              | 0 | N.A. | 0 |
| ADAM29      |  |              | 0 | N.A. | 0 |
| ADAM33      |  | -0,280866607 | 0 | N.A. | 0 |
| ADAM7       |  |              | 0 | N.A. | 0 |
| ADAMTS10    |  |              | 0 | N.A. | 0 |
| ADAMTS16    |  | -0,014054397 | 0 | N.A. | 0 |
| ADAMTS18    |  |              | 0 | N.A. | 0 |
| ADAMTS19    |  | -0,091410105 | 0 | N.A. | 0 |
| ADAMTS20    |  |              | 0 | N.A. | 0 |
| ADAMTS3     |  |              | 0 | N.A. | 0 |
| ADAMTS5     |  | -0,237817163 | 0 | N.A. | 0 |
| ADAMTS9-AS1 |  |              | 0 | N.A. | 0 |
| ADAMTSL1    |  | -0,171577683 | 0 | N.A. | 0 |
| ADAMTSL3    |  | -0,006737522 | 0 | N.A. | 0 |
| ADARB2      |  |              | 0 | N.A. | 0 |
| ADARB2-AS1  |  |              | 0 | N.A. | 0 |
| ADCYAP1R1   |  |              | 0 | N.A. | 0 |
| ADD2        |  | 0,103478018  | 0 | N.A. | 0 |
| ADH1B       |  |              | 0 | N.A. | 0 |
| ADORA1      |  | 0,101505268  | 0 | N.A. | 0 |
| ADORA2A     |  |              | 0 | N.A. | 0 |
| ADRA1A      |  |              | 0 | N.A. | 0 |
| ADRB3       |  |              | 0 | N.A. | 0 |
| AF011889.2  |  | 0,210032705  | 0 | N.A. | 0 |
| AF038458.5  |  |              | 0 | N.A. | 0 |
| AF064858.11 |  |              | 0 | N.A. | 0 |
| AF064860.7  |  | 0,222726693  | 0 | N.A. | 0 |
| AF121898.3  |  |              | 0 | N.A. | 0 |
| AF124730.4  |  | 0,148686451  | 0 | N.A. | 0 |

|             |  |              |      |   |
|-------------|--|--------------|------|---|
| AF127577.10 |  | 0            | N.A. | 0 |
| AF127936.5  |  | 0            | N.A. | 0 |
| AF131215.6  |  | 0            | N.A. | 0 |
| AF131216.5  |  | 0            | N.A. | 0 |
| AF131216.6  |  | 0,143789501  | N.A. | 0 |
| AF131217.1  |  | 0            | N.A. | 0 |
| AF146191.4  |  | -0,052154202 | N.A. | 0 |
| AF178030.2  |  | 0            | N.A. | 0 |
| AF196970.3  |  | 0            | N.A. | 0 |
| AF230666.2  |  | 0            | N.A. | 0 |
| AGRP        |  | 0            | N.A. | 0 |
| AGTR1       |  | 0            | N.A. | 0 |
| AHSP        |  | -0,025234084 | N.A. | 0 |
| AICDA       |  | 0            | N.A. | 0 |
| AIPL1       |  | -0,041843372 | N.A. | 0 |
| AJ003147.9  |  | 0,026283336  | N.A. | 0 |
| AJ006998.2  |  | 0,010504664  | N.A. | 0 |
| AJ011932.1  |  | 0            | N.A. | 0 |
| AJ239322.1  |  | 0            | N.A. | 0 |
| AJAP1       |  | 0            | N.A. | 0 |
| AK5         |  | -0,072540193 | N.A. | 0 |
| AKR1B15     |  | 0            | N.A. | 0 |
| AKR1D1      |  | 0            | N.A. | 0 |
| AL022344.5  |  | 0,035082506  | N.A. | 0 |
| AL022344.7  |  | 0            | N.A. | 0 |
| AL022476.2  |  | 0            | N.A. | 0 |
| AL022578.1  |  | 0            | N.A. | 0 |
| AL035610.2  |  | 0            | N.A. | 0 |
| AL109761.5  |  | 0            | N.A. | 0 |
| AL109763.2  |  | 0            | N.A. | 0 |
| AL109767.1  |  | 0            | N.A. | 0 |
| AL122127.25 |  | 0            | N.A. | 0 |
| AL132709.8  |  | 0            | N.A. | 0 |

|             |  |              |   |      |   |
|-------------|--|--------------|---|------|---|
| AL157902.3  |  |              | 0 | N.A. | 0 |
| AL161668.5  |  | -0,036612563 | 0 | N.A. | 0 |
| AL365202.1  |  |              | 0 | N.A. | 0 |
| AL513523.2  |  | -0,262987561 | 0 | N.A. | 0 |
| AL592528.1  |  |              | 0 | N.A. | 0 |
| AL645728.1  |  |              | 0 | N.A. | 0 |
| AL672294.1  |  |              | 0 | N.A. | 0 |
| AL928742.12 |  |              | 0 | N.A. | 0 |
| ALAS2       |  |              | 0 | N.A. | 0 |
| ALB         |  |              | 0 | N.A. | 0 |
| ALDH1L1-AS2 |  |              | 0 | N.A. | 0 |
| ALG13-AS1   |  |              | 0 | N.A. | 0 |
| ALKBH3-AS1  |  | -0,149338531 | 0 | N.A. | 0 |
| ALLC        |  |              | 0 | N.A. | 0 |
| ALOX12      |  |              | 0 | N.A. | 0 |
| ALOX15B     |  | -0,271408439 | 0 | N.A. | 0 |
| ALS2CR11    |  | 0,005755801  | 0 | N.A. | 0 |
| ALX3        |  |              | 0 | N.A. | 0 |
| AMER2       |  |              | 0 | N.A. | 0 |
| AMHR2       |  |              | 0 | N.A. | 0 |
| AMIGO3      |  | 0,191144241  | 0 | N.A. | 0 |
| AMPD1       |  |              | 0 | N.A. | 0 |
| AMPH        |  |              | 0 | N.A. | 0 |
| AMZ1        |  | 0,010336041  | 0 | N.A. | 0 |
| ANGPT1      |  | -0,23751237  | 0 | N.A. | 0 |
| ANGPT4      |  |              | 0 | N.A. | 0 |
| ANGPTL1     |  |              | 0 | N.A. | 0 |
| ANGPTL7     |  |              | 0 | N.A. | 0 |
| ANKRD2      |  |              | 0 | N.A. | 0 |
| ANKRD20A2   |  | 0,050211548  | 0 | N.A. | 0 |
| ANKRD30A    |  |              | 0 | N.A. | 0 |
| ANKRD30BL   |  |              | 0 | N.A. | 0 |
| ANKRD34C    |  |              | 0 | N.A. | 0 |

|             |  |              |   |      |   |
|-------------|--|--------------|---|------|---|
| ANKRD45     |  | 0,269034692  | 0 | N.A. | 0 |
| ANKRD53     |  |              | 0 | N.A. | 0 |
| ANKRD55     |  |              | 0 | N.A. | 0 |
| ANKRD61     |  | -0,044682659 | 0 | N.A. | 0 |
| ANKRD66     |  |              | 0 | N.A. | 0 |
| ANKRD7      |  | 0,035909195  | 0 | N.A. | 0 |
| ANKUB1      |  |              | 0 | N.A. | 0 |
| ANO1-AS1    |  |              | 0 | N.A. | 0 |
| ANO1-AS2    |  |              | 0 | N.A. | 0 |
| ANO2        |  |              | 0 | N.A. | 0 |
| ANO3        |  | 0,28564292   | 0 | N.A. | 0 |
| ANO4        |  |              | 0 | N.A. | 0 |
| ANO5        |  |              | 0 | N.A. | 0 |
| ANP32D      |  |              | 0 | N.A. | 0 |
| AP000223.42 |  |              | 0 | N.A. | 0 |
| AP000233.4  |  |              | 0 | N.A. | 0 |
| AP000255.6  |  |              | 0 | N.A. | 0 |
| AP000265.1  |  | -0,100007591 | 0 | N.A. | 0 |
| AP000266.7  |  |              | 0 | N.A. | 0 |
| AP000289.6  |  | -0,061463922 | 0 | N.A. | 0 |
| AP000304.12 |  | -0,047864984 | 0 | N.A. | 0 |
| AP000318.2  |  | 0,435854968  | 0 | N.A. | 0 |
| AP000320.6  |  | 0,152710136  | 0 | N.A. | 0 |
| AP000343.2  |  | 0,014722007  | 0 | N.A. | 0 |
| AP000345.1  |  |              | 0 | N.A. | 0 |
| AP000349.2  |  | -0,026702031 | 0 | N.A. | 0 |
| AP000350.10 |  | 0,042750086  | 0 | N.A. | 0 |
| AP000355.2  |  |              | 0 | N.A. | 0 |
| AP000438.2  |  | 0,061989084  | 0 | N.A. | 0 |
| AP000439.1  |  |              | 0 | N.A. | 0 |
| AP000442.4  |  |              | 0 | N.A. | 0 |
| AP000473.5  |  |              | 0 | N.A. | 0 |
| AP000473.8  |  |              | 0 | N.A. | 0 |

|             |  |              |   |      |   |
|-------------|--|--------------|---|------|---|
| AP000476.1  |  |              | 0 | N.A. | 0 |
| AP000593.7  |  |              | 0 | N.A. | 0 |
| AP000640.10 |  | 0,287127054  | 0 | N.A. | 0 |
| AP000688.29 |  |              | 0 | N.A. | 0 |
| AP000695.6  |  |              | 0 | N.A. | 0 |
| AP000696.2  |  | 0,23933568   | 0 | N.A. | 0 |
| AP000697.6  |  | 0,008936393  | 0 | N.A. | 0 |
| AP000705.7  |  |              | 0 | N.A. | 0 |
| AP000721.4  |  |              | 0 | N.A. | 0 |
| AP000797.4  |  |              | 0 | N.A. | 0 |
| AP000892.4  |  |              | 0 | N.A. | 0 |
| AP001046.5  |  | 0,143789501  | 0 | N.A. | 0 |
| AP001046.6  |  |              | 0 | N.A. | 0 |
| AP001056.1  |  |              | 0 | N.A. | 0 |
| AP001057.1  |  |              | 0 | N.A. | 0 |
| AP001059.5  |  |              | 0 | N.A. | 0 |
| AP001063.1  |  |              | 0 | N.A. | 0 |
| AP001257.1  |  | 0,195904803  | 0 | N.A. | 0 |
| AP001432.14 |  |              | 0 | N.A. | 0 |
| AP001434.2  |  |              | 0 | N.A. | 0 |
| AP001468.58 |  |              | 0 | N.A. | 0 |
| AP001469.7  |  |              | 0 | N.A. | 0 |
| AP001471.1  |  |              | 0 | N.A. | 0 |
| AP001476.2  |  |              | 0 | N.A. | 0 |
| AP001476.3  |  |              | 0 | N.A. | 0 |
| AP001596.6  |  |              | 0 | N.A. | 0 |
| AP001604.3  |  | -0,338316193 | 0 | N.A. | 0 |
| AP001610.5  |  | -0,046122416 | 0 | N.A. | 0 |
| AP001626.1  |  |              | 0 | N.A. | 0 |
| AP001627.1  |  | -0,10805899  | 0 | N.A. | 0 |
| AP002884.2  |  | 0,044869346  | 0 | N.A. | 0 |
| AP002954.3  |  |              | 0 | N.A. | 0 |
| AP002954.4  |  |              | 0 | N.A. | 0 |

|              |  |              |   |      |   |
|--------------|--|--------------|---|------|---|
| AP003025.2   |  |              | 0 | N.A. | 0 |
| AP003774.4   |  |              | 0 | N.A. | 0 |
| AP003774.6   |  |              | 0 | N.A. | 0 |
| AP004372.1   |  |              | 0 | N.A. | 0 |
| AP005530.2   |  |              | 0 | N.A. | 0 |
| AP006621.8   |  | -0,013811343 | 0 | N.A. | 0 |
| AP006621.9   |  | 0,372198168  | 0 | N.A. | 0 |
| APCDD1L      |  | -0,005973519 | 0 | N.A. | 0 |
| APELA        |  |              | 0 | N.A. | 0 |
| APOA1-AS     |  |              | 0 | N.A. | 0 |
| APOB         |  |              | 0 | N.A. | 0 |
| APOBEC2      |  | 0,062658061  | 0 | N.A. | 0 |
| APOBEC3B-AS1 |  | -0,344885361 | 0 | N.A. | 0 |
| APOBEC4      |  | -0,058329868 | 0 | N.A. | 0 |
| APOC3        |  | 0,026283336  | 0 | N.A. | 0 |
| APOF         |  |              | 0 | N.A. | 0 |
| AQP10        |  |              | 0 | N.A. | 0 |
| AQP2         |  |              | 0 | N.A. | 0 |
| AQP4-AS1     |  |              | 0 | N.A. | 0 |
| ARAP1-AS1    |  |              | 0 | N.A. | 0 |
| ARAP1-AS2    |  |              | 0 | N.A. | 0 |
| ARHGAP20     |  | -0,080387704 | 0 | N.A. | 0 |
| ARHGAP28     |  |              | 0 | N.A. | 0 |
| ARHGEF15     |  |              | 0 | N.A. | 0 |
| ARHGEF33     |  |              | 0 | N.A. | 0 |
| ARL5C        |  |              | 0 | N.A. | 0 |
| ARMC12       |  | -0,233465888 | 0 | N.A. | 0 |
| ARMC3        |  | 0,104895788  | 0 | N.A. | 0 |
| ARMCX3-AS1   |  |              | 0 | N.A. | 0 |
| ARMS2        |  |              | 0 | N.A. | 0 |
| ARPC4-TTLL3  |  | -0,138065558 | 0 | N.A. | 0 |
| ARPP21       |  |              | 0 | N.A. | 0 |
| ARR3         |  |              | 0 | N.A. | 0 |



|              |  |             |   |      |   |
|--------------|--|-------------|---|------|---|
| ARRDC5       |  |             | 0 | N.A. | 0 |
| ART4         |  |             | 0 | N.A. | 0 |
| ASB10        |  |             | 0 | N.A. | 0 |
| ASB11        |  | 0,239831307 | 0 | N.A. | 0 |
| ASB14        |  | 0,058001787 | 0 | N.A. | 0 |
| ASCL4        |  |             | 0 | N.A. | 0 |
| ASIC5        |  |             | 0 | N.A. | 0 |
| ASPA         |  | 0,012990927 | 0 | N.A. | 0 |
| ASPDH        |  |             | 0 | N.A. | 0 |
| ASTL         |  |             | 0 | N.A. | 0 |
| ASTN1        |  |             | 0 | N.A. | 0 |
| ASXL3        |  |             | 0 | N.A. | 0 |
| ASZ1         |  |             | 0 | N.A. | 0 |
| ATP11A-AS1   |  |             | 0 | N.A. | 0 |
| ATP12A       |  | 0,203646366 | 0 | N.A. | 0 |
| ATP13A5      |  |             | 0 | N.A. | 0 |
| ATP1A4       |  |             | 0 | N.A. | 0 |
| ATP1B3-AS1   |  |             | 0 | N.A. | 0 |
| ATP1B4       |  |             | 0 | N.A. | 0 |
| ATP2B2       |  |             | 0 | N.A. | 0 |
| ATP2B3       |  |             | 0 | N.A. | 0 |
| ATP4B        |  |             | 0 | N.A. | 0 |
| ATP5J2-PTCD1 |  |             | 0 | N.A. | 0 |
| ATP6V0D2     |  |             | 0 | N.A. | 0 |
| ATP6V1B1-AS1 |  |             | 0 | N.A. | 0 |
| ATRNL1       |  |             | 0 | N.A. | 0 |
| AVPR2        |  |             | 0 | N.A. | 0 |
| AWAT2        |  |             | 0 | N.A. | 0 |
| B3GAT1       |  |             | 0 | N.A. | 0 |
| B4GALNT1     |  |             | 0 | N.A. | 0 |
| BAALC-AS2    |  |             | 0 | N.A. | 0 |
| BACE2-IT1    |  |             | 0 | N.A. | 0 |
| BAI3         |  |             | 0 | N.A. | 0 |

|             |  |              |   |      |   |
|-------------|--|--------------|---|------|---|
| BANCR       |  |              | 0 | N.A. | 0 |
| BANF2       |  | -0,111496295 | 0 | N.A. | 0 |
| BARX1-AS1   |  |              | 0 | N.A. | 0 |
| BBOX1       |  |              | 0 | N.A. | 0 |
| BCHE        |  | 0,247187261  | 0 | N.A. | 0 |
| BDNF        |  |              | 0 | N.A. | 0 |
| BEAN1-AS1   |  |              | 0 | N.A. | 0 |
| BEND2       |  |              | 0 | N.A. | 0 |
| BEND4       |  | -0,119409565 | 0 | N.A. | 0 |
| BEND5       |  | -0,085913398 | 0 | N.A. | 0 |
| BEND6       |  |              | 0 | N.A. | 0 |
| BEX1        |  |              | 0 | N.A. | 0 |
| BFSP2       |  | -0,130425705 | 0 | N.A. | 0 |
| BFSP2-AS1   |  |              | 0 | N.A. | 0 |
| BHLHA15     |  |              | 0 | N.A. | 0 |
| BHLHA9      |  | 0,086912565  | 0 | N.A. | 0 |
| BHLHE22     |  |              | 0 | N.A. | 0 |
| BHMT        |  | -0,057605904 | 0 | N.A. | 0 |
| BHMT2       |  |              | 0 | N.A. | 0 |
| BIRC6-AS2   |  | 0,231852562  | 0 | N.A. | 0 |
| BLID        |  |              | 0 | N.A. | 0 |
| BMP8A       |  |              | 0 | N.A. | 0 |
| BMPR1B      |  | 0,163781425  | 0 | N.A. | 0 |
| BMPR1B-AS1  |  |              | 0 | N.A. | 0 |
| BNC1        |  |              | 0 | N.A. | 0 |
| bP-218909.3 |  |              | 0 | N.A. | 0 |
| BPIFB1      |  |              | 0 | N.A. | 0 |
| BPIFB4      |  |              | 0 | N.A. | 0 |
| BRDT        |  |              | 0 | N.A. | 0 |
| BSN-AS2     |  |              | 0 | N.A. | 0 |
| BSND        |  |              | 0 | N.A. | 0 |
| BTG4        |  |              | 0 | N.A. | 0 |
| BVES-AS1    |  |              | 0 | N.A. | 0 |

|                 |  |              |   |      |   |
|-----------------|--|--------------|---|------|---|
| BX255923.3      |  |              | 0 | N.A. | 0 |
| BX322559.3      |  | -0,213918434 | 0 | N.A. | 0 |
| C10orf105       |  |              | 0 | N.A. | 0 |
| C10orf90        |  |              | 0 | N.A. | 0 |
| C11orf16        |  |              | 0 | N.A. | 0 |
| C11orf44        |  | -0,018498013 | 0 | N.A. | 0 |
| C11orf52        |  |              | 0 | N.A. | 0 |
| C11orf87        |  |              | 0 | N.A. | 0 |
| C11orf88        |  |              | 0 | N.A. | 0 |
| C11orf91        |  | 0,486274108  | 0 | N.A. | 0 |
| C11orf94        |  | -0,000164059 | 0 | N.A. | 0 |
| C11orf97        |  | 0,177802537  | 0 | N.A. | 0 |
| C12orf40        |  |              | 0 | N.A. | 0 |
| C12orf54        |  | 0,288804646  | 0 | N.A. | 0 |
| C12orf71        |  | 0,024083864  | 0 | N.A. | 0 |
| C12orf74        |  |              | 0 | N.A. | 0 |
| C12orf77        |  |              | 0 | N.A. | 0 |
| C12orf79        |  |              | 0 | N.A. | 0 |
| C12orf80        |  |              | 0 | N.A. | 0 |
| C14orf178       |  |              | 0 | N.A. | 0 |
| C14orf39        |  |              | 0 | N.A. | 0 |
| C15orf38-AP3S2  |  |              | 0 | N.A. | 0 |
| C15orf53        |  |              | 0 | N.A. | 0 |
| C15orf54        |  |              | 0 | N.A. | 0 |
| C15orf59        |  |              | 0 | N.A. | 0 |
| C15orf59-AS1    |  |              | 0 | N.A. | 0 |
| C16orf47        |  |              | 0 | N.A. | 0 |
| C16orf90        |  |              | 0 | N.A. | 0 |
| C16orf96        |  |              | 0 | N.A. | 0 |
| C17orf105       |  |              | 0 | N.A. | 0 |
| C17orf61-PLSCR3 |  | -0,151367356 | 0 | N.A. | 0 |
| C17orf64        |  | -0,025234084 | 0 | N.A. | 0 |
| C18orf42        |  | 0,055796637  | 0 | N.A. | 0 |

|               |  |              |   |      |   |
|---------------|--|--------------|---|------|---|
| C19orf35      |  | 0,171832858  | 0 | N.A. | 0 |
| C19orf71      |  |              | 0 | N.A. | 0 |
| C19orf84      |  |              | 0 | N.A. | 0 |
| C1orf100      |  |              | 0 | N.A. | 0 |
| C1orf140      |  |              | 0 | N.A. | 0 |
| C1orf141      |  | 0,068107124  | 0 | N.A. | 0 |
| C1orf143      |  |              | 0 | N.A. | 0 |
| C1orf145      |  |              | 0 | N.A. | 0 |
| C1orf147      |  | 0,032898196  | 0 | N.A. | 0 |
| C1orf158      |  |              | 0 | N.A. | 0 |
| C1orf189      |  |              | 0 | N.A. | 0 |
| C1orf234      |  | 0,211474217  | 0 | N.A. | 0 |
| C1orf94       |  |              | 0 | N.A. | 0 |
| C1QL3         |  |              | 0 | N.A. | 0 |
| C1QTNF3-AMACR |  |              | 0 | N.A. | 0 |
| C1QTNF5       |  |              | 0 | N.A. | 0 |
| C1QTNF7       |  | -0,209238787 | 0 | N.A. | 0 |
| C1QTNF8       |  |              | 0 | N.A. | 0 |
| C1QTNF9B      |  |              | 0 | N.A. | 0 |
| C20orf141     |  |              | 0 | N.A. | 0 |
| C20orf166-AS1 |  |              | 0 | N.A. | 0 |
| C20orf197     |  |              | 0 | N.A. | 0 |
| C20orf203     |  |              | 0 | N.A. | 0 |
| C22orf15      |  |              | 0 | N.A. | 0 |
| C22orf23      |  | 0,049680117  | 0 | N.A. | 0 |
| C22orf31      |  |              | 0 | N.A. | 0 |
| C22orf34      |  |              | 0 | N.A. | 0 |
| C2orf40       |  |              | 0 | N.A. | 0 |
| C2orf66       |  |              | 0 | N.A. | 0 |
| C2orf73       |  | 0,060210134  | 0 | N.A. | 0 |
| C2orf74       |  | 0,012560558  | 0 | N.A. | 0 |
| C2orf80       |  |              | 0 | N.A. | 0 |
| C2orf83       |  |              | 0 | N.A. | 0 |

|             |  |              |   |      |   |
|-------------|--|--------------|---|------|---|
| C2orf91     |  | 0,059085364  | 0 | N.A. | 0 |
| C3orf20     |  |              | 0 | N.A. | 0 |
| C3orf36     |  |              | 0 | N.A. | 0 |
| C3orf49     |  |              | 0 | N.A. | 0 |
| C3orf67-AS1 |  | 0,218441627  | 0 | N.A. | 0 |
| C3orf80     |  |              | 0 | N.A. | 0 |
| C4B         |  |              | 0 | N.A. | 0 |
| C4orf22     |  |              | 0 | N.A. | 0 |
| C4orf26     |  |              | 0 | N.A. | 0 |
| C4orf50     |  |              | 0 | N.A. | 0 |
| C4orf51     |  |              | 0 | N.A. | 0 |
| C5orf47     |  | 0,034357583  | 0 | N.A. | 0 |
| C6          |  |              | 0 | N.A. | 0 |
| C6orf10     |  |              | 0 | N.A. | 0 |
| C6orf118    |  |              | 0 | N.A. | 0 |
| C6orf165    |  | -0,252894512 | 0 | N.A. | 0 |
| C6orf195    |  |              | 0 | N.A. | 0 |
| C6orf47-AS1 |  | 0,021619     | 0 | N.A. | 0 |
| C6orf58     |  | -0,106231977 | 0 | N.A. | 0 |
| C7orf33     |  |              | 0 | N.A. | 0 |
| C7orf34     |  |              | 0 | N.A. | 0 |
| C7orf69     |  |              | 0 | N.A. | 0 |
| C7orf72     |  |              | 0 | N.A. | 0 |
| C8A         |  |              | 0 | N.A. | 0 |
| C8B         |  |              | 0 | N.A. | 0 |
| C8orf46     |  | 0,042534969  | 0 | N.A. | 0 |
| C8orf48     |  |              | 0 | N.A. | 0 |
| C8orf49     |  | 0,107732166  | 0 | N.A. | 0 |
| C8orf87     |  |              | 0 | N.A. | 0 |
| C8orf88     |  | -0,202447485 | 0 | N.A. | 0 |
| C9          |  |              | 0 | N.A. | 0 |
| C9orf106    |  | 0,10353456   | 0 | N.A. | 0 |
| C9orf129    |  |              | 0 | N.A. | 0 |

|              |  |              |   |      |   |
|--------------|--|--------------|---|------|---|
| C9orf131     |  |              | 0 | N.A. | 0 |
| C9orf139     |  |              | 0 | N.A. | 0 |
| C9orf170     |  |              | 0 | N.A. | 0 |
| C9orf173     |  | -0,261848912 | 0 | N.A. | 0 |
| C9orf173-AS1 |  | 0,173973547  | 0 | N.A. | 0 |
| C9orf47      |  |              | 0 | N.A. | 0 |
| C9orf84      |  | 0,013370774  | 0 | N.A. | 0 |
| C9orf92      |  |              | 0 | N.A. | 0 |
| CA10         |  |              | 0 | N.A. | 0 |
| CA6          |  | 0,073451438  | 0 | N.A. | 0 |
| CACNA1B      |  |              | 0 | N.A. | 0 |
| CACNA1C-AS1  |  | -0,080035384 | 0 | N.A. | 0 |
| CACNA1C-AS2  |  | -0,139939874 | 0 | N.A. | 0 |
| CACNA1G      |  |              | 0 | N.A. | 0 |
| CACNA1G-AS1  |  |              | 0 | N.A. | 0 |
| CACNA1I      |  |              | 0 | N.A. | 0 |
| CACNA1S      |  | 0,056783282  | 0 | N.A. | 0 |
| CACNA2D1     |  | 0,329897066  | 0 | N.A. | 0 |
| CACNG3       |  |              | 0 | N.A. | 0 |
| CACTIN-AS1   |  |              | 0 | N.A. | 0 |
| CADM3        |  |              | 0 | N.A. | 0 |
| CADM3-AS1    |  |              | 0 | N.A. | 0 |
| CAHM         |  |              | 0 | N.A. | 0 |
| CALCB        |  |              | 0 | N.A. | 0 |
| CALCR        |  | 0,024736465  | 0 | N.A. | 0 |
| CALCRL       |  | -0,044453462 | 0 | N.A. | 0 |
| CALHM1       |  |              | 0 | N.A. | 0 |
| CALML3-AS1   |  | 0,184641497  | 0 | N.A. | 0 |
| CALML6       |  |              | 0 | N.A. | 0 |
| CALN1        |  |              | 0 | N.A. | 0 |
| CAMK1G       |  |              | 0 | N.A. | 0 |
| CAMK2A       |  |              | 0 | N.A. | 0 |
| CAND2        |  |              | 0 | N.A. | 0 |

|               |  |              |   |      |   |
|---------------|--|--------------|---|------|---|
| CAPN11        |  | 0,037778938  | 0 | N.A. | 0 |
| CAPSL         |  |              | 0 | N.A. | 0 |
| CARD17        |  |              | 0 | N.A. | 0 |
| CARTPT        |  |              | 0 | N.A. | 0 |
| CASC10        |  |              | 0 | N.A. | 0 |
| CASC18        |  |              | 0 | N.A. | 0 |
| CASK-AS1      |  |              | 0 | N.A. | 0 |
| CASQ1         |  |              | 0 | N.A. | 0 |
| CASR          |  |              | 0 | N.A. | 0 |
| CATIP         |  | -0,113073    | 0 | N.A. | 0 |
| CATSPER4      |  | 0,273978834  | 0 | N.A. | 0 |
| CAV3          |  |              | 0 | N.A. | 0 |
| CBLN2         |  |              | 0 | N.A. | 0 |
| CBY3          |  | 0,346059433  | 0 | N.A. | 0 |
| CC2D2B        |  |              | 0 | N.A. | 0 |
| CCDC103       |  |              | 0 | N.A. | 0 |
| CCDC116       |  | 0,102925216  | 0 | N.A. | 0 |
| CCDC141       |  |              | 0 | N.A. | 0 |
| CCDC144NL-AS1 |  | 0,047142793  | 0 | N.A. | 0 |
| CCDC147-AS1   |  |              | 0 | N.A. | 0 |
| CCDC155       |  |              | 0 | N.A. | 0 |
| CCDC158       |  | -0,057605904 | 0 | N.A. | 0 |
| CCDC160       |  |              | 0 | N.A. | 0 |
| CCDC166       |  | 0,169844441  | 0 | N.A. | 0 |
| CCDC169       |  |              | 0 | N.A. | 0 |
| CCDC178       |  |              | 0 | N.A. | 0 |
| CCDC179       |  |              | 0 | N.A. | 0 |
| CCDC184       |  | -0,054776406 | 0 | N.A. | 0 |
| CCDC26        |  |              | 0 | N.A. | 0 |
| CCDC33        |  | 0,033564399  | 0 | N.A. | 0 |
| CCDC36        |  |              | 0 | N.A. | 0 |
| CCDC38        |  | 0,039558427  | 0 | N.A. | 0 |
| CCDC39        |  | -0,111509386 | 0 | N.A. | 0 |

|             |  |              |   |      |   |
|-------------|--|--------------|---|------|---|
| CCDC42      |  |              | 0 | N.A. | 0 |
| CCDC62      |  | 0,100404708  | 0 | N.A. | 0 |
| CCDC63      |  |              | 0 | N.A. | 0 |
| CCDC65      |  | -0,103696705 | 0 | N.A. | 0 |
| CCDC67      |  | -0,13558316  | 0 | N.A. | 0 |
| CCDC70      |  |              | 0 | N.A. | 0 |
| CCDC73      |  | -0,033236238 | 0 | N.A. | 0 |
| CCDC79      |  | 0,186222427  | 0 | N.A. | 0 |
| CCDC8       |  |              | 0 | N.A. | 0 |
| CCDC83      |  |              | 0 | N.A. | 0 |
| CCDC87      |  | 0,059103248  | 0 | N.A. | 0 |
| CCDC89      |  | -0,056663581 | 0 | N.A. | 0 |
| CCIN        |  |              | 0 | N.A. | 0 |
| CCL1        |  |              | 0 | N.A. | 0 |
| CCL15-CCL14 |  | 0,272992736  | 0 | N.A. | 0 |
| CCL16       |  | 0,118036944  | 0 | N.A. | 0 |
| CCL23       |  |              | 0 | N.A. | 0 |
| CCL27       |  | 0,000705319  | 0 | N.A. | 0 |
| CCM2L       |  |              | 0 | N.A. | 0 |
| CCNA1       |  |              | 0 | N.A. | 0 |
| CCNB3       |  | -0,04776802  | 0 | N.A. | 0 |
| CCR2        |  |              | 0 | N.A. | 0 |
| CCR8        |  |              | 0 | N.A. | 0 |
| CCR9        |  | 0,047550175  | 0 | N.A. | 0 |
| CD180       |  |              | 0 | N.A. | 0 |
| CD1A        |  |              | 0 | N.A. | 0 |
| CD1B        |  |              | 0 | N.A. | 0 |
| CD1D        |  | -0,146847718 | 0 | N.A. | 0 |
| CD1E        |  | -0,308079787 | 0 | N.A. | 0 |
| CD200R1L    |  |              | 0 | N.A. | 0 |
| CD207       |  |              | 0 | N.A. | 0 |
| CD209       |  |              | 0 | N.A. | 0 |
| CD300LD     |  |              | 0 | N.A. | 0 |



|            |  |              |   |      |   |
|------------|--|--------------|---|------|---|
| CD300LG    |  |              | 0 | N.A. | 0 |
| CD33       |  | 0,22885242   | 0 | N.A. | 0 |
| CD5L       |  |              | 0 | N.A. | 0 |
| CDH12      |  |              | 0 | N.A. | 0 |
| CDH18      |  |              | 0 | N.A. | 0 |
| CDH20      |  |              | 0 | N.A. | 0 |
| CDH22      |  |              | 0 | N.A. | 0 |
| CDH6       |  | -0,077890875 | 0 | N.A. | 0 |
| CDH8       |  | 0,169294948  | 0 | N.A. | 0 |
| CDK15      |  |              | 0 | N.A. | 0 |
| CDKN2A-AS1 |  |              | 0 | N.A. | 0 |
| CDO1       |  | -0,05312472  | 0 | N.A. | 0 |
| CDR1-AS    |  | -0,059303777 | 0 | N.A. | 0 |
| CDRT15L2   |  |              | 0 | N.A. | 0 |
| CEACAM16   |  |              | 0 | N.A. | 0 |
| CEACAM18   |  | 0,390905335  | 0 | N.A. | 0 |
| CECR7      |  |              | 0 | N.A. | 0 |
| CELF2-AS1  |  |              | 0 | N.A. | 0 |
| CELF4      |  |              | 0 | N.A. | 0 |
| CELF6      |  |              | 0 | N.A. | 0 |
| CER1       |  | 0,19358288   | 0 | N.A. | 0 |
| CERS3      |  |              | 0 | N.A. | 0 |
| CES5A      |  |              | 0 | N.A. | 0 |
| CETP       |  | -0,19208203  | 0 | N.A. | 0 |
| CFAP126    |  | -0,229634179 | 0 | N.A. | 0 |
| CFAP221    |  |              | 0 | N.A. | 0 |
| CFAP52     |  |              | 0 | N.A. | 0 |
| CFAP61     |  | -0,254079073 | 0 | N.A. | 0 |
| CFC1       |  |              | 0 | N.A. | 0 |
| CFHR1      |  |              | 0 | N.A. | 0 |
| CFHR3      |  | 0,166819163  | 0 | N.A. | 0 |
| CGB2       |  | 0,352993988  | 0 | N.A. | 0 |
| CGB7       |  | -0,065629575 | 0 | N.A. | 0 |

|                |              |   |      |   |
|----------------|--------------|---|------|---|
| CH17-118O6.3   |              | 0 | N.A. | 0 |
| CH17-270A2.2   |              | 0 | N.A. | 0 |
| CH17-302M23.1  |              | 0 | N.A. | 0 |
| CH17-353B19.1  | 0,212313578  | 0 | N.A. | 0 |
| CH17-360D5.3   | 0,481977331  | 0 | N.A. | 0 |
| CH17-437K3.1   |              | 0 | N.A. | 0 |
| CH17-80A12.1   | 0,151026597  | 0 | N.A. | 0 |
| CH507-145C22.1 | -0,159945608 | 0 | N.A. | 0 |
| CH507-210P18.1 | 0,278573823  | 0 | N.A. | 0 |
| CH507-236L23.1 |              | 0 | N.A. | 0 |
| CH507-24F1.1   | -0,06119256  | 0 | N.A. | 0 |
| CH507-254M2.1  | -0,086214174 | 0 | N.A. | 0 |
| CH507-42P11.6  | 0,364379078  | 0 | N.A. | 0 |
| CH507-513H4.1  |              | 0 | N.A. | 0 |
| CH507-513H4.3  | -0,115718355 | 0 | N.A. | 0 |
| CH507-513H4.5  |              | 0 | N.A. | 0 |
| CH507-528H12.1 | 0,271778021  | 0 | N.A. | 0 |
| CH507-9B2.8    |              | 0 | N.A. | 0 |
| CHAD           | 0,372381846  | 0 | N.A. | 0 |
| CHD5           | 0,339428679  | 0 | N.A. | 0 |
| CHODL          |              | 0 | N.A. | 0 |
| CHRD1          | -0,341721309 | 0 | N.A. | 0 |
| CHRD2          | 0,018592192  | 0 | N.A. | 0 |
| CHRM1          | -0,074178516 | 0 | N.A. | 0 |
| CHRM2          |              | 0 | N.A. | 0 |
| CHRM4          |              | 0 | N.A. | 0 |
| CHRM5          |              | 0 | N.A. | 0 |
| CHRNA1         |              | 0 | N.A. | 0 |
| CHRNA6         |              | 0 | N.A. | 0 |
| CHRNA9         |              | 0 | N.A. | 0 |
| CHRN2          |              | 0 | N.A. | 0 |
| CHST2          |              | 0 | N.A. | 0 |
| CHST9          |              | 0 | N.A. | 0 |

|              |  |              |   |      |   |
|--------------|--|--------------|---|------|---|
| CIB3         |  |              | 0 | N.A. | 0 |
| CIDEA        |  |              | 0 | N.A. | 0 |
| CILP         |  |              | 0 | N.A. | 0 |
| CLDN10-AS1   |  | 0,234160984  | 0 | N.A. | 0 |
| CLDN11       |  | -0,295132472 | 0 | N.A. | 0 |
| CLDN22       |  | 0,081138471  | 0 | N.A. | 0 |
| CLDN8        |  | 0,225817442  | 0 | N.A. | 0 |
| CLEC12A      |  | 0,054728317  | 0 | N.A. | 0 |
| CLEC12B      |  |              | 0 | N.A. | 0 |
| CLEC17A      |  |              | 0 | N.A. | 0 |
| CLEC18B      |  |              | 0 | N.A. | 0 |
| CLEC19A      |  |              | 0 | N.A. | 0 |
| CLEC1A       |  |              | 0 | N.A. | 0 |
| CLEC1B       |  |              | 0 | N.A. | 0 |
| CLEC2L       |  |              | 0 | N.A. | 0 |
| CLEC3B       |  |              | 0 | N.A. | 0 |
| CLEC4C       |  |              | 0 | N.A. | 0 |
| CLEC4D       |  |              | 0 | N.A. | 0 |
| CLEC4F       |  |              | 0 | N.A. | 0 |
| CLEC4G       |  |              | 0 | N.A. | 0 |
| CLEC4M       |  |              | 0 | N.A. | 0 |
| CLEC6A       |  |              | 0 | N.A. | 0 |
| CLEC9A       |  | -0,080951034 | 0 | N.A. | 0 |
| CLPSL1       |  |              | 0 | N.A. | 0 |
| CLVS1        |  | 0,024083864  | 0 | N.A. | 0 |
| CLVS2        |  |              | 0 | N.A. | 0 |
| CMA1         |  |              | 0 | N.A. | 0 |
| CMB9-55A18.1 |  |              | 0 | N.A. | 0 |
| CMP21-97G8.1 |  |              | 0 | N.A. | 0 |
| CMP21-97G8.2 |  | -0,021182102 | 0 | N.A. | 0 |
| CMTM1        |  | 0,053293719  | 0 | N.A. | 0 |
| CMTM5        |  |              | 0 | N.A. | 0 |
| CNGA4        |  |              | 0 | N.A. | 0 |

|             |  |              |   |      |   |
|-------------|--|--------------|---|------|---|
| CNGB1       |  | 0,236951663  | 0 | N.A. | 0 |
| CNGB3       |  | -0,350742472 | 0 | N.A. | 0 |
| CNKSR2      |  |              | 0 | N.A. | 0 |
| CNR1        |  |              | 0 | N.A. | 0 |
| CNR2        |  |              | 0 | N.A. | 0 |
| CNRIP1      |  | 0,002381383  | 0 | N.A. | 0 |
| CNTF        |  |              | 0 | N.A. | 0 |
| CNTN1       |  | -0,12642022  | 0 | N.A. | 0 |
| CNTN2       |  |              | 0 | N.A. | 0 |
| CNTN4       |  |              | 0 | N.A. | 0 |
| CNTN5       |  | -0,30847373  | 0 | N.A. | 0 |
| CNTN6       |  |              | 0 | N.A. | 0 |
| CNTNAP5     |  |              | 0 | N.A. | 0 |
| COL18A1-AS1 |  | 0,232150643  | 0 | N.A. | 0 |
| COL19A1     |  |              | 0 | N.A. | 0 |
| COL20A1     |  | 0,002722114  | 0 | N.A. | 0 |
| COL22A1     |  | 0,30937273   | 0 | N.A. | 0 |
| COL23A1     |  |              | 0 | N.A. | 0 |
| COL25A1     |  | 0,175796347  | 0 | N.A. | 0 |
| COL26A1     |  | -0,387758915 | 0 | N.A. | 0 |
| COL4A2-AS1  |  |              | 0 | N.A. | 0 |
| COL4A2-AS2  |  |              | 0 | N.A. | 0 |
| COL4A3      |  |              | 0 | N.A. | 0 |
| COL4A5      |  | -0,147290646 | 0 | N.A. | 0 |
| COL4A6      |  |              | 0 | N.A. | 0 |
| COL6A5      |  | 0,137208041  | 0 | N.A. | 0 |
| COL6A6      |  |              | 0 | N.A. | 0 |
| CORIN       |  | 0,044525659  | 0 | N.A. | 0 |
| CORO2B      |  |              | 0 | N.A. | 0 |
| CORO6       |  | 0,045280893  | 0 | N.A. | 0 |
| CORO7-PAM16 |  |              | 0 | N.A. | 0 |
| CORT        |  | -0,115691727 | 0 | N.A. | 0 |
| COX6A2      |  |              | 0 | N.A. | 0 |

|                   |  |              |   |      |   |
|-------------------|--|--------------|---|------|---|
| COX8C             |  |              | 0 | N.A. | 0 |
| CPA1              |  |              | 0 | N.A. | 0 |
| CPB1              |  |              | 0 | N.A. | 0 |
| CPB2              |  |              | 0 | N.A. | 0 |
| CPEB1             |  |              | 0 | N.A. | 0 |
| CPEB2-AS1         |  |              | 0 | N.A. | 0 |
| CPED1             |  | -0,273111738 | 0 | N.A. | 0 |
| CPLX3             |  | 0,143373481  | 0 | N.A. | 0 |
| CPN2              |  |              | 0 | N.A. | 0 |
| CPO               |  |              | 0 | N.A. | 0 |
| CPZ               |  |              | 0 | N.A. | 0 |
| CR1L              |  |              | 0 | N.A. | 0 |
| CR2               |  | -0,294603043 | 0 | N.A. | 0 |
| CRB1              |  | -0,068684195 | 0 | N.A. | 0 |
| CRHBP             |  | -0,142060103 | 0 | N.A. | 0 |
| CRHR2             |  |              | 0 | N.A. | 0 |
| CRISPLD1          |  |              | 0 | N.A. | 0 |
| CRLF2             |  |              | 0 | N.A. | 0 |
| CRP               |  |              | 0 | N.A. | 0 |
| CRTAC1            |  |              | 0 | N.A. | 0 |
| CRYBA1            |  |              | 0 | N.A. | 0 |
| CRYBB1            |  |              | 0 | N.A. | 0 |
| CRYGD             |  |              | 0 | N.A. | 0 |
| CRYGN             |  |              | 0 | N.A. | 0 |
| CSAG1             |  |              | 0 | N.A. | 0 |
| CSDC2             |  |              | 0 | N.A. | 0 |
| CSE1L-AS1         |  |              | 0 | N.A. | 0 |
| CSMD1             |  |              | 0 | N.A. | 0 |
| CSMD3             |  | 0,04468533   | 0 | N.A. | 0 |
| CSNK1G2-AS1       |  |              | 0 | N.A. | 0 |
| CSNK2B-LY6G5B-562 |  | -0,187972307 | 0 | N.A. | 0 |
| CSRP3             |  |              | 0 | N.A. | 0 |
| CST11             |  |              | 0 | N.A. | 0 |

|              |  |              |   |      |   |
|--------------|--|--------------|---|------|---|
| CST2         |  | -0,212592089 | 0 | N.A. | 0 |
| CST5         |  |              | 0 | N.A. | 0 |
| CT45A10      |  |              | 0 | N.A. | 0 |
| CT55         |  |              | 0 | N.A. | 0 |
| CT62         |  |              | 0 | N.A. | 0 |
| CTA-150C2.13 |  | 0,398138741  | 0 | N.A. | 0 |
| CTA-212D2.2  |  | 0,059340545  | 0 | N.A. | 0 |
| CTA-221G9.11 |  | 0,304673468  | 0 | N.A. | 0 |
| CTA-223H9.9  |  |              | 0 | N.A. | 0 |
| CTA-243E7.2  |  |              | 0 | N.A. | 0 |
| CTA-268H5.14 |  |              | 0 | N.A. | 0 |
| CTA-305I2.1  |  |              | 0 | N.A. | 0 |
| CTA-31J9.2   |  |              | 0 | N.A. | 0 |
| CTA-331P3.1  |  |              | 0 | N.A. | 0 |
| CTA-339C12.1 |  |              | 0 | N.A. | 0 |
| CTA-342B11.1 |  |              | 0 | N.A. | 0 |
| CTA-342B11.2 |  |              | 0 | N.A. | 0 |
| CTA-363E6.5  |  | 0,053870431  | 0 | N.A. | 0 |
| CTA-373H7.7  |  |              | 0 | N.A. | 0 |
| CTA-390C10.9 |  |              | 0 | N.A. | 0 |
| CTA-392E5.1  |  |              | 0 | N.A. | 0 |
| CTA-397H3.3  |  | 9,04937E-06  | 0 | N.A. | 0 |
| CTA-407F11.8 |  |              | 0 | N.A. | 0 |
| CTA-481E9.4  |  | 0,093178046  | 0 | N.A. | 0 |
| CTA-503F6.2  |  |              | 0 | N.A. | 0 |
| CTA-796E4.4  |  |              | 0 | N.A. | 0 |
| CTA-797E19.2 |  |              | 0 | N.A. | 0 |
| CTA-833B7.2  |  |              | 0 | N.A. | 0 |
| CTA-984G1.5  |  |              | 0 | N.A. | 0 |
| CTA-989H11.1 |  | 0,002812394  | 0 | N.A. | 0 |
| CTA-992D9.10 |  |              | 0 | N.A. | 0 |
| CTA-992D9.11 |  |              | 0 | N.A. | 0 |
| CTAG2        |  |              | 0 | N.A. | 0 |

|              |  |              |   |      |   |
|--------------|--|--------------|---|------|---|
| CTAGE1       |  |              | 0 | N.A. | 0 |
| CTAGE15      |  | -0,079735045 | 0 | N.A. | 0 |
| CTAGE4       |  | 0,217808664  | 0 | N.A. | 0 |
| CTAGE6       |  | -0,08211732  | 0 | N.A. | 0 |
| CTAGE8       |  |              | 0 | N.A. | 0 |
| CTB-107G13.1 |  |              | 0 | N.A. | 0 |
| CTB-108O6.2  |  |              | 0 | N.A. | 0 |
| CTB-113P19.1 |  |              | 0 | N.A. | 0 |
| CTB-113P19.4 |  |              | 0 | N.A. | 0 |
| CTB-114C7.4  |  |              | 0 | N.A. | 0 |
| CTB-118P15.2 |  |              | 0 | N.A. | 0 |
| CTB-11I22.1  |  | 0,011035405  | 0 | N.A. | 0 |
| CTB-11I22.2  |  |              | 0 | N.A. | 0 |
| CTB-120L21.1 |  |              | 0 | N.A. | 0 |
| CTB-12A17.3  |  |              | 0 | N.A. | 0 |
| CTB-12O2.1   |  | -0,027339268 | 0 | N.A. | 0 |
| CTB-133G6.1  |  | -0,225163244 | 0 | N.A. | 0 |
| CTB-138E5.1  |  |              | 0 | N.A. | 0 |
| CTB-147C13.1 |  | 0,128160971  | 0 | N.A. | 0 |
| CTB-147C22.8 |  | 0,322187757  | 0 | N.A. | 0 |
| CTB-147C22.9 |  | 0,474446859  | 0 | N.A. | 0 |
| CTB-151G24.1 |  |              | 0 | N.A. | 0 |
| CTB-158D10.3 |  |              | 0 | N.A. | 0 |
| CTB-161M19.4 |  | 0,010450598  | 0 | N.A. | 0 |
| CTB-167B5.1  |  |              | 0 | N.A. | 0 |
| CTB-174D11.1 |  |              | 0 | N.A. | 0 |
| CTB-175E5.7  |  | 0,163464693  | 0 | N.A. | 0 |
| CTB-176F20.3 |  | -0,033059873 | 0 | N.A. | 0 |
| CTB-17P3.4   |  |              | 0 | N.A. | 0 |
| CTB-180A7.3  |  |              | 0 | N.A. | 0 |
| CTB-184G21.3 |  |              | 0 | N.A. | 0 |
| CTB-186G2.1  |  |              | 0 | N.A. | 0 |
| CTB-186G2.4  |  | 0,065040643  | 0 | N.A. | 0 |

|              |              |   |      |   |
|--------------|--------------|---|------|---|
| CTB-186H2.3  |              | 0 | N.A. | 0 |
| CTB-189B5.3  |              | 0 | N.A. | 0 |
| CTB-191K22.6 | 0,058828896  | 0 | N.A. | 0 |
| CTB-193M12.1 |              | 0 | N.A. | 0 |
| CTB-30L5.1   |              | 0 | N.A. | 0 |
| CTB-31N19.5  | 0,032892105  | 0 | N.A. | 0 |
| CTB-31O20.3  | -0,045242429 | 0 | N.A. | 0 |
| CTB-31O20.8  |              | 0 | N.A. | 0 |
| CTB-31O20.9  |              | 0 | N.A. | 0 |
| CTB-33G10.11 |              | 0 | N.A. | 0 |
| CTB-35F21.1  |              | 0 | N.A. | 0 |
| CTB-39G8.2   | 0,059168623  | 0 | N.A. | 0 |
| CTB-41I6.1   |              | 0 | N.A. | 0 |
| CTB-41I6.2   |              | 0 | N.A. | 0 |
| CTB-43P18.1  | -0,267832545 | 0 | N.A. | 0 |
| CTB-49A3.4   | -0,178475295 | 0 | N.A. | 0 |
| CTB-49A3.5   |              | 0 | N.A. | 0 |
| CTB-4E7.1    |              | 0 | N.A. | 0 |
| CTB-50L17.7  |              | 0 | N.A. | 0 |
| CTB-50L17.9  | 0,103604969  | 0 | N.A. | 0 |
| CTB-55O6.10  | 0,283046259  | 0 | N.A. | 0 |
| CTB-55O6.4   |              | 0 | N.A. | 0 |
| CTB-58E17.9  |              | 0 | N.A. | 0 |
| CTB-60B18.10 |              | 0 | N.A. | 0 |
| CTB-78F1.1   |              | 0 | N.A. | 0 |
| CTB-79E8.2   |              | 0 | N.A. | 0 |
| CTB-83J4.1   | 0,035865989  | 0 | N.A. | 0 |
| CTB-91J4.1   |              | 0 | N.A. | 0 |
| CTB-92J24.3  |              | 0 | N.A. | 0 |
| CTC-228N24.2 | -0,261848912 | 0 | N.A. | 0 |
| CTC-232P5.3  |              | 0 | N.A. | 0 |
| CTC-242N15.1 |              | 0 | N.A. | 0 |
| CTC-265F19.3 |              | 0 | N.A. | 0 |



|              |              |   |      |   |
|--------------|--------------|---|------|---|
| CTC-273B12.5 | 0,34389655   | 0 | N.A. | 0 |
| CTC-276P9.4  |              | 0 | N.A. | 0 |
| CTC-281F24.1 |              | 0 | N.A. | 0 |
| CTC-296K1.3  |              | 0 | N.A. | 0 |
| CTC-297N7.1  |              | 0 | N.A. | 0 |
| CTC-297N7.9  |              | 0 | N.A. | 0 |
| CTC-301O7.4  |              | 0 | N.A. | 0 |
| CTC-325H20.4 |              | 0 | N.A. | 0 |
| CTC-325J23.2 |              | 0 | N.A. | 0 |
| CTC-327F10.5 |              | 0 | N.A. | 0 |
| CTC-329D1.3  |              | 0 | N.A. | 0 |
| CTC-338M12.1 | 0,343684064  | 0 | N.A. | 0 |
| CTC-338M12.2 | 0,104962059  | 0 | N.A. | 0 |
| CTC-339O9.1  |              | 0 | N.A. | 0 |
| CTC-340A15.2 |              | 0 | N.A. | 0 |
| CTC-340I23.2 |              | 0 | N.A. | 0 |
| CTC-343N3.1  | -0,028308157 | 0 | N.A. | 0 |
| CTC-344H19.4 | 0,19457346   | 0 | N.A. | 0 |
| CTC-360G5.6  |              | 0 | N.A. | 0 |
| CTC-360G5.9  |              | 0 | N.A. | 0 |
| CTC-366B18.2 |              | 0 | N.A. | 0 |
| CTC-384G19.1 |              | 0 | N.A. | 0 |
| CTC-420A11.2 |              | 0 | N.A. | 0 |
| CTC-429P9.1  | 0,225225324  | 0 | N.A. | 0 |
| CTC-429P9.2  | -0,119409565 | 0 | N.A. | 0 |
| CTC-429P9.4  |              | 0 | N.A. | 0 |
| CTC-431G16.2 | -0,110976234 | 0 | N.A. | 0 |
| CTC-435M10.3 |              | 0 | N.A. | 0 |
| CTC-435M10.6 |              | 0 | N.A. | 0 |
| CTC-436K13.1 |              | 0 | N.A. | 0 |
| CTC-436K13.2 |              | 0 | N.A. | 0 |
| CTC-436P18.1 | -0,099739463 | 0 | N.A. | 0 |
| CTC-441N14.1 |              | 0 | N.A. | 0 |

|               |  |              |      |      |   |
|---------------|--|--------------|------|------|---|
| CTC-441N14.2  |  | 0            | N.A. | 0    |   |
| CTC-444N24.13 |  | -0,030166881 | 0    | N.A. | 0 |
| CTC-448D22.1  |  |              | 0    | N.A. | 0 |
| CTC-453G23.5  |  |              | 0    | N.A. | 0 |
| CTC-453G23.8  |  | -0,17055876  | 0    | N.A. | 0 |
| CTC-454I21.3  |  | -0,099099305 | 0    | N.A. | 0 |
| CTC-457L16.2  |  |              | 0    | N.A. | 0 |
| CTC-458I2.2   |  | -0,08092989  | 0    | N.A. | 0 |
| CTC-459M5.2   |  |              | 0    | N.A. | 0 |
| CTC-467M3.1   |  |              | 0    | N.A. | 0 |
| CTC-479C5.10  |  |              | 0    | N.A. | 0 |
| CTC-482H14.5  |  |              | 0    | N.A. | 0 |
| CTC-487M23.5  |  | 0,044112527  | 0    | N.A. | 0 |
| CTC-487M23.7  |  |              | 0    | N.A. | 0 |
| CTC-492K19.4  |  |              | 0    | N.A. | 0 |
| CTC-493L21.1  |  |              | 0    | N.A. | 0 |
| CTC-497E21.3  |  | 0,096068791  | 0    | N.A. | 0 |
| CTC-498J12.3  |  | 0,029615827  | 0    | N.A. | 0 |
| CTC-499B15.7  |  |              | 0    | N.A. | 0 |
| CTC-499J9.1   |  |              | 0    | N.A. | 0 |
| CTC-506B8.1   |  |              | 0    | N.A. | 0 |
| CTC-510F12.2  |  |              | 0    | N.A. | 0 |
| CTC-510F12.7  |  |              | 0    | N.A. | 0 |
| CTC-518B2.12  |  |              | 0    | N.A. | 0 |
| CTC-523E23.4  |  |              | 0    | N.A. | 0 |
| CTC-523E23.5  |  |              | 0    | N.A. | 0 |
| CTC-529G1.1   |  |              | 0    | N.A. | 0 |
| CTC-542B22.2  |  | -0,099739463 | 0    | N.A. | 0 |
| CTC-546K23.1  |  |              | 0    | N.A. | 0 |
| CTC-548K16.2  |  |              | 0    | N.A. | 0 |
| CTC-548K16.5  |  |              | 0    | N.A. | 0 |
| CTC-558O2.1   |  |              | 0    | N.A. | 0 |
| CTC-558O2.2   |  | 0,09102857   | 0    | N.A. | 0 |

|               |  |              |   |      |   |
|---------------|--|--------------|---|------|---|
| CTC-559E9.4   |  |              | 0 | N.A. | 0 |
| CTC-575N7.1   |  |              | 0 | N.A. | 0 |
| CTC-806A22.1  |  | 0,214361305  | 0 | N.A. | 0 |
| CTCFL         |  |              | 0 | N.A. | 0 |
| CTD-2002J20.1 |  |              | 0 | N.A. | 0 |
| CTD-2003C8.2  |  |              | 0 | N.A. | 0 |
| CTD-2006C1.13 |  |              | 0 | N.A. | 0 |
| CTD-2006K23.2 |  |              | 0 | N.A. | 0 |
| CTD-2008L17.1 |  |              | 0 | N.A. | 0 |
| CTD-2008L17.2 |  |              | 0 | N.A. | 0 |
| CTD-2012K14.3 |  | -0,327681265 | 0 | N.A. | 0 |
| CTD-2012K14.4 |  | -0,314214783 | 0 | N.A. | 0 |
| CTD-2013N17.4 |  |              | 0 | N.A. | 0 |
| CTD-2014B16.3 |  |              | 0 | N.A. | 0 |
| CTD-2017C7.1  |  |              | 0 | N.A. | 0 |
| CTD-2017C7.2  |  |              | 0 | N.A. | 0 |
| CTD-2017F17.1 |  | 0,230731372  | 0 | N.A. | 0 |
| CTD-2021H9.2  |  | 0,402560851  | 0 | N.A. | 0 |
| CTD-2021H9.3  |  | 0,175370843  | 0 | N.A. | 0 |
| CTD-2023M8.1  |  |              | 0 | N.A. | 0 |
| CTD-2024P10.1 |  |              | 0 | N.A. | 0 |
| CTD-2024P10.2 |  |              | 0 | N.A. | 0 |
| CTD-2026D20.2 |  |              | 0 | N.A. | 0 |
| CTD-2026K11.3 |  |              | 0 | N.A. | 0 |
| CTD-2026K11.6 |  | 0,264498552  | 0 | N.A. | 0 |
| CTD-2031P19.5 |  | 0,081138471  | 0 | N.A. | 0 |
| CTD-2034I21.2 |  | -0,146159673 | 0 | N.A. | 0 |
| CTD-2036P10.5 |  | -0,136193838 | 0 | N.A. | 0 |
| CTD-2036P10.6 |  |              | 0 | N.A. | 0 |
| CTD-2044J15.1 |  |              | 0 | N.A. | 0 |
| CTD-2054N24.2 |  |              | 0 | N.A. | 0 |
| CTD-2058B24.2 |  |              | 0 | N.A. | 0 |
| CTD-2061E19.6 |  |              | 0 | N.A. | 0 |

|                |              |   |      |   |
|----------------|--------------|---|------|---|
| CTD-2066L21.3  | -0,047231321 | 0 | N.A. | 0 |
| CTD-2072I24.1  |              | 0 | N.A. | 0 |
| CTD-2083E4.6   |              | 0 | N.A. | 0 |
| CTD-2089N3.2   |              | 0 | N.A. | 0 |
| CTD-2091N23.1  |              | 0 | N.A. | 0 |
| CTD-2105E13.14 | 0,023538198  | 0 | N.A. | 0 |
| CTD-2113L7.1   |              | 0 | N.A. | 0 |
| CTD-2116N17.1  | -0,041233565 | 0 | N.A. | 0 |
| CTD-2117L12.1  |              | 0 | N.A. | 0 |
| CTD-2118P12.1  | 0,073084264  | 0 | N.A. | 0 |
| CTD-2126E3.3   |              | 0 | N.A. | 0 |
| CTD-2126E3.4   |              | 0 | N.A. | 0 |
| CTD-2130O13.1  | 0,179732487  | 0 | N.A. | 0 |
| CTD-2134A5.4   | 0,045817691  | 0 | N.A. | 0 |
| CTD-2135D7.5   |              | 0 | N.A. | 0 |
| CTD-2135J3.3   |              | 0 | N.A. | 0 |
| CTD-2140B24.6  | -0,097864271 | 0 | N.A. | 0 |
| CTD-2142D14.1  | 0,483024011  | 0 | N.A. | 0 |
| CTD-2151A2.1   |              | 0 | N.A. | 0 |
| CTD-2154I11.2  | -0,018967617 | 0 | N.A. | 0 |
| CTD-2162K18.3  |              | 0 | N.A. | 0 |
| CTD-2162K18.4  |              | 0 | N.A. | 0 |
| CTD-2168K21.2  |              | 0 | N.A. | 0 |
| CTD-2171N6.1   | -0,140394041 | 0 | N.A. | 0 |
| CTD-2184D3.3   |              | 0 | N.A. | 0 |
| CTD-2184D3.5   | 0,206870995  | 0 | N.A. | 0 |
| CTD-2184D3.6   |              | 0 | N.A. | 0 |
| CTD-2184D3.7   |              | 0 | N.A. | 0 |
| CTD-2192J16.20 | 0,097114575  | 0 | N.A. | 0 |
| CTD-2192J16.22 | -0,209886889 | 0 | N.A. | 0 |
| CTD-2193P3.2   |              | 0 | N.A. | 0 |
| CTD-2195B23.3  |              | 0 | N.A. | 0 |
| CTD-2196E14.3  |              | 0 | N.A. | 0 |

|               |              |   |      |   |
|---------------|--------------|---|------|---|
| CTD-2199O4.1  | 0,105819084  | 0 | N.A. | 0 |
| CTD-2199O4.6  |              | 0 | N.A. | 0 |
| CTD-2201E9.4  |              | 0 | N.A. | 0 |
| CTD-2201G3.1  |              | 0 | N.A. | 0 |
| CTD-2207P18.2 |              | 0 | N.A. | 0 |
| CTD-2213F21.3 |              | 0 | N.A. | 0 |
| CTD-2215E18.1 | 0,319623583  | 0 | N.A. | 0 |
| CTD-2223O18.1 | -0,230162589 | 0 | N.A. | 0 |
| CTD-2227I18.1 | 0,179732487  | 0 | N.A. | 0 |
| CTD-2231E14.4 |              | 0 | N.A. | 0 |
| CTD-2236F14.1 |              | 0 | N.A. | 0 |
| CTD-2240E14.4 |              | 0 | N.A. | 0 |
| CTD-2240J17.1 |              | 0 | N.A. | 0 |
| CTD-2240J17.3 |              | 0 | N.A. | 0 |
| CTD-2245F17.6 |              | 0 | N.A. | 0 |
| CTD-2246P4.1  |              | 0 | N.A. | 0 |
| CTD-2256P15.5 |              | 0 | N.A. | 0 |
| CTD-2263F21.1 | 0,146140569  | 0 | N.A. | 0 |
| CTD-2265O21.3 |              | 0 | N.A. | 0 |
| CTD-2265O21.7 |              | 0 | N.A. | 0 |
| CTD-2267D19.3 |              | 0 | N.A. | 0 |
| CTD-2269F5.1  |              | 0 | N.A. | 0 |
| CTD-2270F17.1 |              | 0 | N.A. | 0 |
| CTD-2280E9.1  |              | 0 | N.A. | 0 |
| CTD-2281M20.1 |              | 0 | N.A. | 0 |
| CTD-2287O16.4 | 0,047989625  | 0 | N.A. | 0 |
| CTD-2288O8.1  |              | 0 | N.A. | 0 |
| CTD-2291D10.1 |              | 0 | N.A. | 0 |
| CTD-2292M14.1 | -0,13275093  | 0 | N.A. | 0 |
| CTD-2292P10.2 |              | 0 | N.A. | 0 |
| CTD-2296D1.5  |              | 0 | N.A. | 0 |
| CTD-2298J14.2 |              | 0 | N.A. | 0 |
| CTD-2306M5.1  |              | 0 | N.A. | 0 |

|                |  |              |      |      |
|----------------|--|--------------|------|------|
| CTD-2311M21.3  |  | 0            | N.A. | 0    |
| CTD-2313J17.7  |  | 0            | N.A. | 0    |
| CTD-2314B22.1  |  | 0            | N.A. | 0    |
| CTD-2315E11.1  |  | 0            | N.A. | 0    |
| CTD-2320G14.2  |  | 0            | N.A. | 0    |
| CTD-2325A15.5  |  | -0,095581944 | 0    | N.A. |
| CTD-2325P2.3   |  | 0            | N.A. | 0    |
| CTD-2329K10.1  |  | 0            | N.A. | 0    |
| CTD-2330J20.2  |  | 0            | N.A. | 0    |
| CTD-2330K9.3   |  | 0            | N.A. | 0    |
| CTD-2334D19.1  |  | 0            | N.A. | 0    |
| CTD-2337A12.1  |  | 0            | N.A. | 0    |
| CTD-2339F6.1   |  | 0            | N.A. | 0    |
| CTD-2340E1.2   |  | 0            | N.A. | 0    |
| CTD-2341M24.1  |  | 0,109736688  | 0    | N.A. |
| CTD-2342N23.3  |  | 0            | N.A. | 0    |
| CTD-2349P21.11 |  | 0            | N.A. | 0    |
| CTD-2349P21.6  |  | 0            | N.A. | 0    |
| CTD-2353F22.1  |  | 0            | N.A. | 0    |
| CTD-2358C21.3  |  | 0,376494317  | 0    | N.A. |
| CTD-2358C21.4  |  | 0            | N.A. | 0    |
| CTD-2369P2.5   |  | 0            | N.A. | 0    |
| CTD-2369P2.8   |  | 0,088213979  | 0    | N.A. |
| CTD-2373H9.5   |  | 0            | N.A. | 0    |
| CTD-2373N4.5   |  | 0,422594587  | 0    | N.A. |
| CTD-2376I20.1  |  | 0            | N.A. | 0    |
| CTD-2376I4.1   |  | -8,40519E-05 | 0    | N.A. |
| CTD-2377D24.4  |  | -0,107397537 | 0    | N.A. |
| CTD-2378E12.1  |  | 0,162917966  | 0    | N.A. |
| CTD-2378E21.1  |  | 0            | N.A. | 0    |
| CTD-2380F24.1  |  | 0            | N.A. | 0    |
| CTD-2384B11.2  |  | 0,236229665  | 0    | N.A. |
| CTD-2410N18.5  |  | 0            | N.A. | 0    |

|                |              |   |      |   |
|----------------|--------------|---|------|---|
| CTD-2501M5.1   | 0,204747135  | 0 | N.A. | 0 |
| CTD-2506J14.1  |              | 0 | N.A. | 0 |
| CTD-2507G9.1   |              | 0 | N.A. | 0 |
| CTD-2509G16.2  |              | 0 | N.A. | 0 |
| CTD-2509G16.5  |              | 0 | N.A. | 0 |
| CTD-2515H24.2  |              | 0 | N.A. | 0 |
| CTD-2517M22.16 |              | 0 | N.A. | 0 |
| CTD-2521M24.6  | 0,055869398  | 0 | N.A. | 0 |
| CTD-2523D13.2  | 0,266399379  | 0 | N.A. | 0 |
| CTD-2524L6.3   |              | 0 | N.A. | 0 |
| CTD-2525I3.2   |              | 0 | N.A. | 0 |
| CTD-2525I3.3   |              | 0 | N.A. | 0 |
| CTD-2525I3.5   | 0,18479211   | 0 | N.A. | 0 |
| CTD-2528A14.5  |              | 0 | N.A. | 0 |
| CTD-2531D15.4  |              | 0 | N.A. | 0 |
| CTD-2531D15.5  | 0,026295128  | 0 | N.A. | 0 |
| CTD-2532K18.2  | 0,378777871  | 0 | N.A. | 0 |
| CTD-2534I21.8  |              | 0 | N.A. | 0 |
| CTD-2535I10.1  |              | 0 | N.A. | 0 |
| CTD-2535L24.2  | -0,109404982 | 0 | N.A. | 0 |
| CTD-2535L24.3  | -0,027339268 | 0 | N.A. | 0 |
| CTD-2536I1.3   |              | 0 | N.A. | 0 |
| CTD-2537I9.12  | -0,07517481  | 0 | N.A. | 0 |
| CTD-2537I9.16  |              | 0 | N.A. | 0 |
| CTD-2537I9.18  | 0,172741018  | 0 | N.A. | 0 |
| CTD-2540L5.6   | 0,320539817  | 0 | N.A. | 0 |
| CTD-2540M10.1  |              | 0 | N.A. | 0 |
| CTD-2541J13.1  |              | 0 | N.A. | 0 |
| CTD-2541M15.3  | -0,111333376 | 0 | N.A. | 0 |
| CTD-2542L18.1  |              | 0 | N.A. | 0 |
| CTD-2544N14.3  | -0,238373313 | 0 | N.A. | 0 |
| CTD-2545M3.2   |              | 0 | N.A. | 0 |
| CTD-2545M3.8   |              | 0 | N.A. | 0 |

|                |  |              |      |      |   |
|----------------|--|--------------|------|------|---|
| CTD-2547L24.4  |  | 0            | N.A. | 0    |   |
| CTD-2553C6.1   |  | 0            | N.A. | 0    |   |
| CTD-2554C21.2  |  | -0,07201275  | 0    | N.A. | 0 |
| CTD-2554C21.3  |  | 0            | N.A. | 0    |   |
| CTD-2555A7.3   |  | 0            | N.A. | 0    |   |
| CTD-2555O16.1  |  | 0            | N.A. | 0    |   |
| CTD-2555O16.2  |  | 0,209176475  | 0    | N.A. | 0 |
| CTD-2561B21.5  |  | 0            | N.A. | 0    |   |
| CTD-2561B21.7  |  | 0            | N.A. | 0    |   |
| CTD-2561F5.1   |  | 0            | N.A. | 0    |   |
| CTD-2562J17.4  |  | 0            | N.A. | 0    |   |
| CTD-2562J17.7  |  | 0            | N.A. | 0    |   |
| CTD-2583A14.10 |  | -0,108933045 | 0    | N.A. | 0 |
| CTD-2583P5.1   |  | 0            | N.A. | 0    |   |
| CTD-2587H24.5  |  | 0            | N.A. | 0    |   |
| CTD-2589M5.5   |  | 0            | N.A. | 0    |   |
| CTD-2600O9.2   |  | 0,28525821   | 0    | N.A. | 0 |
| CTD-2616J11.11 |  | 0,233884123  | 0    | N.A. | 0 |
| CTD-2616J11.14 |  | -0,295575684 | 0    | N.A. | 0 |
| CTD-2616J11.2  |  | 0            | N.A. | 0    |   |
| CTD-2616J11.9  |  | -0,144708927 | 0    | N.A. | 0 |
| CTD-2619J13.19 |  | -0,013798843 | 0    | N.A. | 0 |
| CTD-2619J13.23 |  | 0            | N.A. | 0    |   |
| CTD-2619J13.3  |  | 0            | N.A. | 0    |   |
| CTD-2619J13.9  |  | 0            | N.A. | 0    |   |
| CTD-2620I22.3  |  | 0            | N.A. | 0    |   |
| CTD-2623N2.11  |  | 0            | N.A. | 0    |   |
| CTD-2630F21.1  |  | 0,045724086  | 0    | N.A. | 0 |
| CTD-2631K10.1  |  | 0            | N.A. | 0    |   |
| CTD-2636A23.2  |  | -0,037820226 | 0    | N.A. | 0 |
| CTD-2639E6.9   |  | 0,203757399  | 0    | N.A. | 0 |
| CTD-2647E9.3   |  | 0            | N.A. | 0    |   |
| CTD-2647L4.5   |  | 0            | N.A. | 0    |   |



|                |              |   |      |   |
|----------------|--------------|---|------|---|
| CTD-2649C14.3  |              | 0 | N.A. | 0 |
| CTD-2651B20.3  |              | 0 | N.A. | 0 |
| CTD-2653D5.1   |              | 0 | N.A. | 0 |
| CTD-2653M23.3  |              | 0 | N.A. | 0 |
| CTD-2655K5.1   | 0,138355364  | 0 | N.A. | 0 |
| CTD-2659N19.2  |              | 0 | N.A. | 0 |
| CTD-2659N19.9  |              | 0 | N.A. | 0 |
| CTD-3020H12.4  |              | 0 | N.A. | 0 |
| CTD-3028N15.1  |              | 0 | N.A. | 0 |
| CTD-3028N15.3  |              | 0 | N.A. | 0 |
| CTD-3032J10.2  |              | 0 | N.A. | 0 |
| CTD-3035D6.2   |              | 0 | N.A. | 0 |
| CTD-3035K23.6  |              | 0 | N.A. | 0 |
| CTD-3035K23.7  | -0,087969201 | 0 | N.A. | 0 |
| CTD-3037G24.5  | 0,132375788  | 0 | N.A. | 0 |
| CTD-3051D23.1  |              | 0 | N.A. | 0 |
| CTD-3064H18.2  |              | 0 | N.A. | 0 |
| CTD-3064H18.4  |              | 0 | N.A. | 0 |
| CTD-3065B20.2  |              | 0 | N.A. | 0 |
| CTD-3065B20.3  | 0,219641412  | 0 | N.A. | 0 |
| CTD-3065J16.6  |              | 0 | N.A. | 0 |
| CTD-3073N11.9  |              | 0 | N.A. | 0 |
| CTD-3076O17.1  |              | 0 | N.A. | 0 |
| CTD-3076O17.2  |              | 0 | N.A. | 0 |
| CTD-3080P12.3  |              | 0 | N.A. | 0 |
| CTD-3099C6.7   | -0,040171218 | 0 | N.A. | 0 |
| CTD-3105H18.18 |              | 0 | N.A. | 0 |
| CTD-3105H18.7  | 0,079582923  | 0 | N.A. | 0 |
| CTD-3110H11.1  | -0,242612079 | 0 | N.A. | 0 |
| CTD-3113P16.5  | 0,007353581  | 0 | N.A. | 0 |
| CTD-3116E22.7  | 0,092101135  | 0 | N.A. | 0 |
| CTD-3116E22.8  |              | 0 | N.A. | 0 |
| CTD-3118D11.2  |              | 0 | N.A. | 0 |

|                |  |              |      |      |   |
|----------------|--|--------------|------|------|---|
| CTD-3137H5.1   |  | 0            | N.A. | 0    |   |
| CTD-3154N5.1   |  | -0,174148215 | 0    | N.A. | 0 |
| CTD-3154N5.2   |  |              | 0    | N.A. | 0 |
| CTD-3162L10.1  |  | 0,001047933  | 0    | N.A. | 0 |
| CTD-3179P9.1   |  |              | 0    | N.A. | 0 |
| CTD-3179P9.2   |  |              | 0    | N.A. | 0 |
| CTD-3187F8.14  |  | 0,140134487  | 0    | N.A. | 0 |
| CTD-3193K9.11  |  |              | 0    | N.A. | 0 |
| CTD-3193O13.11 |  |              | 0    | N.A. | 0 |
| CTD-3193O13.13 |  |              | 0    | N.A. | 0 |
| CTD-3193O13.14 |  |              | 0    | N.A. | 0 |
| CTD-3194G12.1  |  |              | 0    | N.A. | 0 |
| CTD-3194G12.2  |  |              | 0    | N.A. | 0 |
| CTD-3203P2.1   |  | 0,125886042  | 0    | N.A. | 0 |
| CTD-3214H19.16 |  |              | 0    | N.A. | 0 |
| CTD-3214H19.6  |  | 0,094967225  | 0    | N.A. | 0 |
| CTD-3220F14.1  |  | 0,034920916  | 0    | N.A. | 0 |
| CTD-3220F14.3  |  |              | 0    | N.A. | 0 |
| CTD-3224I3.3   |  |              | 0    | N.A. | 0 |
| CTD-3224K15.2  |  | 0,392132009  | 0    | N.A. | 0 |
| CTD-3224K15.3  |  | -0,189787438 | 0    | N.A. | 0 |
| CTD-3234P18.6  |  | 0,318719311  | 0    | N.A. | 0 |
| CTD-3239E11.2  |  |              | 0    | N.A. | 0 |
| CTD-3252C9.2   |  | -0,087515972 | 0    | N.A. | 0 |
| CTNNA3         |  | 0,050167029  | 0    | N.A. | 0 |
| CTNND2         |  |              | 0    | N.A. | 0 |
| CUBN           |  | 0,221072751  | 0    | N.A. | 0 |
| CUX2           |  |              | 0    | N.A. | 0 |
| CUZD1          |  |              | 0    | N.A. | 0 |
| CX3CR1         |  | -0,062156001 | 0    | N.A. | 0 |
| CXCR2          |  |              | 0    | N.A. | 0 |
| CXorf21        |  |              | 0    | N.A. | 0 |
| CXorf22        |  | -0,069489142 | 0    | N.A. | 0 |

|            |  |              |   |      |   |
|------------|--|--------------|---|------|---|
| CXorf58    |  | -0,193214118 | 0 | N.A. | 0 |
| CYP11A1    |  |              | 0 | N.A. | 0 |
| CYP1A2     |  | 0,043898844  | 0 | N.A. | 0 |
| CYP1B1-AS1 |  | -0,061043867 | 0 | N.A. | 0 |
| CYP21A2    |  |              | 0 | N.A. | 0 |
| CYP26C1    |  |              | 0 | N.A. | 0 |
| CYP2A6     |  | 0,018592192  | 0 | N.A. | 0 |
| CYP2C19    |  | 0,086940096  | 0 | N.A. | 0 |
| CYP2C8     |  |              | 0 | N.A. | 0 |
| CYP2F1     |  |              | 0 | N.A. | 0 |
| CYP4A11    |  | 0,123950764  | 0 | N.A. | 0 |
| CYP4A22    |  |              | 0 | N.A. | 0 |
| CYP4F22    |  |              | 0 | N.A. | 0 |
| CYP4F26P   |  |              | 0 | N.A. | 0 |
| CYP7A1     |  | 0,057294996  | 0 | N.A. | 0 |
| CYP7B1     |  |              | 0 | N.A. | 0 |
| CYSLTR2    |  |              | 0 | N.A. | 0 |
| D4S234E    |  | -0,248711153 | 0 | N.A. | 0 |
| DACH2      |  |              | 0 | N.A. | 0 |
| DAO        |  |              | 0 | N.A. | 0 |
| DAW1       |  |              | 0 | N.A. | 0 |
| DAZL       |  |              | 0 | N.A. | 0 |
| DBET       |  | -0,207959664 | 0 | N.A. | 0 |
| DBH        |  |              | 0 | N.A. | 0 |
| DBX2       |  |              | 0 | N.A. | 0 |
| DCANP1     |  |              | 0 | N.A. | 0 |
| DCC        |  | -0,274153029 | 0 | N.A. | 0 |
| DCDC1      |  | 0,075324254  | 0 | N.A. | 0 |
| DCDC2B     |  | 0,322550317  | 0 | N.A. | 0 |
| DCDC2C     |  |              | 0 | N.A. | 0 |
| DCHS2      |  |              | 0 | N.A. | 0 |
| DCLK3      |  |              | 0 | N.A. | 0 |
| DCSTAMP    |  |              | 0 | N.A. | 0 |

|               |  |              |   |      |   |
|---------------|--|--------------|---|------|---|
| DCT           |  |              | 0 | N.A. | 0 |
| DDR1-AS1      |  |              | 0 | N.A. | 0 |
| DDX25         |  | 0,001035877  | 0 | N.A. | 0 |
| DDX4          |  |              | 0 | N.A. | 0 |
| DEFA3         |  |              | 0 | N.A. | 0 |
| DEFB119       |  |              | 0 | N.A. | 0 |
| DEFB124       |  |              | 0 | N.A. | 0 |
| DENND5B-AS1   |  |              | 0 | N.A. | 0 |
| DEPDC1-AS1    |  | 0,143789501  | 0 | N.A. | 0 |
| DGAT2L6       |  |              | 0 | N.A. | 0 |
| DGCR9         |  |              | 0 | N.A. | 0 |
| DHRS7C        |  |              | 0 | N.A. | 0 |
| DIRAS1        |  |              | 0 | N.A. | 0 |
| DIRC1         |  |              | 0 | N.A. | 0 |
| DIRC3         |  | -0,017052547 | 0 | N.A. | 0 |
| DIRC3-AS1     |  |              | 0 | N.A. | 0 |
| DKFZP434A062  |  |              | 0 | N.A. | 0 |
| DKFZP434K028  |  | 0,3562943    | 0 | N.A. | 0 |
| DKFZP434L187  |  |              | 0 | N.A. | 0 |
| DKFZp779M0652 |  |              | 0 | N.A. | 0 |
| DKK2          |  | -0,025234084 | 0 | N.A. | 0 |
| DLEU7         |  | 0,210572473  | 0 | N.A. | 0 |
| DLGAP1-AS5    |  | -0,084834724 | 0 | N.A. | 0 |
| DLX1          |  |              | 0 | N.A. | 0 |
| DLX5          |  |              | 0 | N.A. | 0 |
| DMP1          |  |              | 0 | N.A. | 0 |
| DMRT3         |  |              | 0 | N.A. | 0 |
| DNAH10OS      |  |              | 0 | N.A. | 0 |
| DNAH8         |  |              | 0 | N.A. | 0 |
| DNAI1         |  |              | 0 | N.A. | 0 |
| DNAI2         |  |              | 0 | N.A. | 0 |
| DNAJB13       |  |              | 0 | N.A. | 0 |
| DNAJB5-AS1    |  |              | 0 | N.A. | 0 |

|           |  |              |   |      |   |
|-----------|--|--------------|---|------|---|
| DNAJB7    |  | -0,009238789 | 0 | N.A. | 0 |
| DNAJC5G   |  |              | 0 | N.A. | 0 |
| DNTT      |  |              | 0 | N.A. | 0 |
| DOCK3     |  | 0,322520926  | 0 | N.A. | 0 |
| DOCK4-AS1 |  |              | 0 | N.A. | 0 |
| DOK5      |  |              | 0 | N.A. | 0 |
| DOK6      |  |              | 0 | N.A. | 0 |
| DPEP3     |  |              | 0 | N.A. | 0 |
| DPP6      |  | 0,357671948  | 0 | N.A. | 0 |
| DPP9-AS1  |  |              | 0 | N.A. | 0 |
| DPPA4     |  |              | 0 | N.A. | 0 |
| DPY19L2   |  | 0,109987327  | 0 | N.A. | 0 |
| DPYD-AS1  |  |              | 0 | N.A. | 0 |
| DPYS      |  |              | 0 | N.A. | 0 |
| DPYSL4    |  | 0,008375974  | 0 | N.A. | 0 |
| DPYSL5    |  |              | 0 | N.A. | 0 |
| DRC7      |  | 0,068678829  | 0 | N.A. | 0 |
| DRD5      |  | 0,301828534  | 0 | N.A. | 0 |
| DRICH1    |  | 0,370964876  | 0 | N.A. | 0 |
| DSC1      |  |              | 0 | N.A. | 0 |
| DSCAM     |  |              | 0 | N.A. | 0 |
| DSCAS     |  | 0,07973725   | 0 | N.A. | 0 |
| DSG1      |  | 0,051240824  | 0 | N.A. | 0 |
| DSG1-AS1  |  | 0,06262993   | 0 | N.A. | 0 |
| DUSP13    |  |              | 0 | N.A. | 0 |
| DYDC2     |  |              | 0 | N.A. | 0 |
| EBF2      |  | 0,235984239  | 0 | N.A. | 0 |
| EBF3      |  |              | 0 | N.A. | 0 |
| ECT2L     |  |              | 0 | N.A. | 0 |
| EDDM3A    |  |              | 0 | N.A. | 0 |
| EDNRB-AS1 |  |              | 0 | N.A. | 0 |
| EDRF1-AS1 |  |              | 0 | N.A. | 0 |
| EFCAB1    |  |              | 0 | N.A. | 0 |

|             |  |              |   |      |   |
|-------------|--|--------------|---|------|---|
| EFCAB10     |  | 0,005744592  | 0 | N.A. | 0 |
| EFCAB14-AS1 |  |              | 0 | N.A. | 0 |
| EFCAB3      |  | -0,224426966 | 0 | N.A. | 0 |
| EFCAB9      |  |              | 0 | N.A. | 0 |
| EFS         |  |              | 0 | N.A. | 0 |
| EGFLAM      |  | 0,081230251  | 0 | N.A. | 0 |
| EGFLAM-AS4  |  |              | 0 | N.A. | 0 |
| EHMT2-AS1   |  | 0,044279686  | 0 | N.A. | 0 |
| ELANE       |  |              | 0 | N.A. | 0 |
| ELAVL4      |  | 0,063444968  | 0 | N.A. | 0 |
| ELMOD1      |  |              | 0 | N.A. | 0 |
| ELOVL2      |  |              | 0 | N.A. | 0 |
| ELOVL2-AS1  |  |              | 0 | N.A. | 0 |
| ELOVL4      |  | -0,235290495 | 0 | N.A. | 0 |
| ELSPBP1     |  |              | 0 | N.A. | 0 |
| EMILIN3     |  |              | 0 | N.A. | 0 |
| EMR3        |  |              | 0 | N.A. | 0 |
| EMX2        |  |              | 0 | N.A. | 0 |
| ENAM        |  |              | 0 | N.A. | 0 |
| ENOX1       |  | 0,087504759  | 0 | N.A. | 0 |
| ENPP6       |  |              | 0 | N.A. | 0 |
| ENTHD1      |  |              | 0 | N.A. | 0 |
| EOMES       |  | -0,104937672 | 0 | N.A. | 0 |
| EP300-AS1   |  | -0,141782174 | 0 | N.A. | 0 |
| EPGN        |  |              | 0 | N.A. | 0 |
| EPHA3       |  |              | 0 | N.A. | 0 |
| EPHA5       |  |              | 0 | N.A. | 0 |
| EPHA6       |  |              | 0 | N.A. | 0 |
| EPHA7       |  |              | 0 | N.A. | 0 |
| EPHA8       |  | 0,155969132  | 0 | N.A. | 0 |
| EPO         |  |              | 0 | N.A. | 0 |
| EPPIN       |  | -0,084642708 | 0 | N.A. | 0 |
| EPYC        |  | 0,212739267  | 0 | N.A. | 0 |

|             |  |              |   |      |   |
|-------------|--|--------------|---|------|---|
| ERAS        |  | 0,09048175   | 0 | N.A. | 0 |
| ERCC6-PGBD3 |  |              | 0 | N.A. | 0 |
| ERICH1-AS1  |  | 0,092101135  | 0 | N.A. | 0 |
| ERICH6      |  |              | 0 | N.A. | 0 |
| ERMN        |  | 0,191537343  | 0 | N.A. | 0 |
| ERVFRD-1    |  |              | 0 | N.A. | 0 |
| ERVH-1      |  |              | 0 | N.A. | 0 |
| ERVMER61-1  |  |              | 0 | N.A. | 0 |
| ESR1        |  |              | 0 | N.A. | 0 |
| ESRRB       |  | 0,027369755  | 0 | N.A. | 0 |
| ESX1        |  |              | 0 | N.A. | 0 |
| ETV3L       |  |              | 0 | N.A. | 0 |
| EVC         |  |              | 0 | N.A. | 0 |
| EVC2        |  |              | 0 | N.A. | 0 |
| EVPLL       |  | 0,101221679  | 0 | N.A. | 0 |
| EVX2        |  | -0,133570526 | 0 | N.A. | 0 |
| EXD1        |  |              | 0 | N.A. | 0 |
| EYA4        |  | -0,04779246  | 0 | N.A. | 0 |
| EZR-AS1     |  |              | 0 | N.A. | 0 |
| F10-AS1     |  |              | 0 | N.A. | 0 |
| F11         |  |              | 0 | N.A. | 0 |
| F2          |  |              | 0 | N.A. | 0 |
| F2RL2       |  |              | 0 | N.A. | 0 |
| F8A2        |  |              | 0 | N.A. | 0 |
| FABP12      |  | 0,189663764  | 0 | N.A. | 0 |
| FABP7       |  |              | 0 | N.A. | 0 |
| FAM124B     |  |              | 0 | N.A. | 0 |
| FAM133A     |  |              | 0 | N.A. | 0 |
| FAM135B     |  | -0,001750179 | 0 | N.A. | 0 |
| FAM138B     |  |              | 0 | N.A. | 0 |
| FAM150B     |  | 0,21870844   | 0 | N.A. | 0 |
| FAM151A     |  |              | 0 | N.A. | 0 |
| FAM153A     |  |              | 0 | N.A. | 0 |

|             |  |  |              |              |      |      |   |
|-------------|--|--|--------------|--------------|------|------|---|
| FAM153C     |  |  | 0            | N.A.         | 0    |      |   |
| FAM154A     |  |  | -0,271897679 | 0            | N.A. | 0    |   |
| FAM157B     |  |  | 0,190510123  | 0            | N.A. | 0    |   |
| FAM159B     |  |  | 0,13144423   | 0            | N.A. | 0    |   |
| FAM162B     |  |  |              | 0            | N.A. | 0    |   |
| FAM163A     |  |  |              | 0            | N.A. | 0    |   |
| FAM163B     |  |  | 0,287127054  | 0            | N.A. | 0    |   |
| FAM169B     |  |  | 0,164300885  | 0            | N.A. | 0    |   |
| FAM170A     |  |  |              | 0            | N.A. | 0    |   |
| FAM170B     |  |  |              | 0            | N.A. | 0    |   |
| FAM170B-AS1 |  |  |              | 0            | N.A. | 0    |   |
| FAM180A     |  |  |              | 0            | N.A. | 0    |   |
| FAM180B     |  |  |              | 0            | N.A. | 0    |   |
| FAM182B     |  |  | 0,061048125  | 0            | N.A. | 0    |   |
| FAM196A     |  |  |              | 0            | N.A. | 0    |   |
| FAM198A     |  |  |              | 0            | N.A. | 0    |   |
| FAM19A1     |  |  |              | 0            | N.A. | 0    |   |
| FAM19A4     |  |  |              | 0            | N.A. | 0    |   |
| FAM19A5     |  |  |              | 0            | N.A. | 0    |   |
| FAM20A      |  |  | -0,356598221 | 0            | N.A. | 0    |   |
| FAM216B     |  |  |              | 0            | N.A. | 0    |   |
| FAM221B     |  |  |              | 0            | N.A. | 0    |   |
| FAM222A-AS1 |  |  |              | -0,256395722 | 0    | N.A. | 0 |
| FAM228A     |  |  | 0,004537914  | 0            | N.A. | 0    |   |
| FAM26E      |  |  |              | 0            | N.A. | 0    |   |
| FAM43B      |  |  |              | 0            | N.A. | 0    |   |
| FAM53B-AS1  |  |  |              | 0            | N.A. | 0    |   |
| FAM66A      |  |  |              | 0            | N.A. | 0    |   |
| FAM69C      |  |  |              | 0            | N.A. | 0    |   |
| FAM71B      |  |  |              | 0            | N.A. | 0    |   |
| FAM72B      |  |  | -0,067803276 | 0            | N.A. | 0    |   |
| FAM74A6     |  |  |              | 0            | N.A. | 0    |   |
| FAM81B      |  |  | -0,225859288 | 0            | N.A. | 0    |   |



|            |  |              |      |      |   |
|------------|--|--------------|------|------|---|
| FAM83A-AS1 |  | 0            | N.A. | 0    |   |
| FAM86B2    |  | 0,114512939  | 0    | N.A. | 0 |
| FAM87A     |  | -0,076351601 | 0    | N.A. | 0 |
| FAM87B     |  |              | 0    | N.A. | 0 |
| FAM90A1    |  | 0,243282181  | 0    | N.A. | 0 |
| FAM90A26   |  |              | 0    | N.A. | 0 |
| FAM9B      |  |              | 0    | N.A. | 0 |
| FANCD2OS   |  |              | 0    | N.A. | 0 |
| FARSA-AS1  |  |              | 0    | N.A. | 0 |
| FASLG      |  | 0,122973633  | 0    | N.A. | 0 |
| FAT2       |  |              | 0    | N.A. | 0 |
| FAT3       |  |              | 0    | N.A. | 0 |
| FAT4       |  | -0,290807184 | 0    | N.A. | 0 |
| FATE1      |  |              | 0    | N.A. | 0 |
| FBN3       |  |              | 0    | N.A. | 0 |
| FBXL7      |  |              | 0    | N.A. | 0 |
| FBXO3-AS1  |  | 0,273384089  | 0    | N.A. | 0 |
| FBXO39     |  | 0,159654992  | 0    | N.A. | 0 |
| FBXO40     |  |              | 0    | N.A. | 0 |
| FBXO47     |  |              | 0    | N.A. | 0 |
| FCGR1A     |  | -0,13150946  | 0    | N.A. | 0 |
| FCGR1B     |  | 0,010504664  | 0    | N.A. | 0 |
| FCGR3B     |  | -0,215772573 | 0    | N.A. | 0 |
| FCN2       |  |              | 0    | N.A. | 0 |
| FCRL1      |  |              | 0    | N.A. | 0 |
| FCRL4      |  |              | 0    | N.A. | 0 |
| FCRL6      |  | -0,149803229 | 0    | N.A. | 0 |
| FDCSP      |  | -0,281355771 | 0    | N.A. | 0 |
| FER1L5     |  |              | 0    | N.A. | 0 |
| FFAR1      |  |              | 0    | N.A. | 0 |
| FFAR3      |  |              | 0    | N.A. | 0 |
| FGF1       |  |              | 0    | N.A. | 0 |
| FGF10      |  |              | 0    | N.A. | 0 |

|           |  |              |   |      |   |
|-----------|--|--------------|---|------|---|
| FGF10-AS1 |  |              | 0 | N.A. | 0 |
| FGF12-AS3 |  |              | 0 | N.A. | 0 |
| FGF13-AS1 |  |              | 0 | N.A. | 0 |
| FGF14     |  |              | 0 | N.A. | 0 |
| FGF16     |  |              | 0 | N.A. | 0 |
| FGF23     |  |              | 0 | N.A. | 0 |
| FGF4      |  |              | 0 | N.A. | 0 |
| FGF5      |  |              | 0 | N.A. | 0 |
| FGG       |  | 0,29175436   | 0 | N.A. | 0 |
| FHL5      |  |              | 0 | N.A. | 0 |
| FIBIN     |  | -0,058138904 | 0 | N.A. | 0 |
| FIGLA     |  |              | 0 | N.A. | 0 |
| FKSG59    |  |              | 0 | N.A. | 0 |
| FKSG63    |  | 0,186222427  | 0 | N.A. | 0 |
| FLG-AS1   |  |              | 0 | N.A. | 0 |
| FLG2      |  | 0,009743993  | 0 | N.A. | 0 |
| FLJ16779  |  |              | 0 | N.A. | 0 |
| FLJ33360  |  | 0,037909559  | 0 | N.A. | 0 |
| FLJ35934  |  |              | 0 | N.A. | 0 |
| FLJ38122  |  |              | 0 | N.A. | 0 |
| FLJ39080  |  |              | 0 | N.A. | 0 |
| FLJ40288  |  |              | 0 | N.A. | 0 |
| FLJ41941  |  |              | 0 | N.A. | 0 |
| FLJ42969  |  |              | 0 | N.A. | 0 |
| FLJ43879  |  | 0,257172813  | 0 | N.A. | 0 |
| FLJ45079  |  |              | 0 | N.A. | 0 |
| FLRT1     |  |              | 1 | none | 0 |
| FLRT2     |  |              | 0 | N.A. | 0 |
| FLT3      |  | -0,088935629 | 0 | N.A. | 0 |
| FMN2      |  | -0,099509523 | 0 | N.A. | 0 |
| FMO1      |  | -0,189553819 | 0 | N.A. | 0 |
| FMO2      |  |              | 0 | N.A. | 0 |
| FMO3      |  | 0,352553131  | 0 | N.A. | 0 |

|             |  |              |   |      |   |
|-------------|--|--------------|---|------|---|
| FNDC7       |  | -0,02543432  | 0 | N.A. | 0 |
| FNDC8       |  | -0,095396813 | 0 | N.A. | 0 |
| FNDC9       |  |              | 0 | N.A. | 0 |
| FO538757.3  |  |              | 0 | N.A. | 0 |
| FOLH1       |  |              | 0 | N.A. | 0 |
| FOXB1       |  | 0,057484978  | 0 | N.A. | 0 |
| FOXC2-AS1   |  | -0,126463422 | 0 | N.A. | 0 |
| FOXD3       |  | -0,029286771 | 0 | N.A. | 0 |
| FOXD4L3     |  |              | 0 | N.A. | 0 |
| FOXD4L5     |  |              | 0 | N.A. | 0 |
| FOXE3       |  | -0,289123872 | 0 | N.A. | 0 |
| FOXF2       |  |              | 0 | N.A. | 0 |
| FOXI2       |  |              | 0 | N.A. | 0 |
| FOXI3       |  |              | 0 | N.A. | 0 |
| FOXL2       |  |              | 0 | N.A. | 0 |
| FPGT-TNNI3K |  | -0,040000788 | 0 | N.A. | 0 |
| FREM3       |  | -0,148445782 | 0 | N.A. | 0 |
| FRMD6-AS2   |  |              | 0 | N.A. | 0 |
| FRMD7       |  |              | 0 | N.A. | 0 |
| FRMPD4      |  |              | 0 | N.A. | 0 |
| FRY-AS1     |  |              | 0 | N.A. | 0 |
| FSBP        |  | -0,181421577 | 0 | N.A. | 0 |
| FSD2        |  | 0,269966323  | 0 | N.A. | 0 |
| FTCD        |  |              | 0 | N.A. | 0 |
| FUT5        |  |              | 0 | N.A. | 0 |
| FXYD6-FXYD2 |  |              | 0 | N.A. | 0 |
| G6PC2       |  |              | 0 | N.A. | 0 |
| GABBR2      |  |              | 0 | N.A. | 0 |
| GABRA1      |  |              | 0 | N.A. | 0 |
| GABRA3      |  |              | 0 | N.A. | 0 |
| GABRA5      |  |              | 0 | N.A. | 0 |
| GABRB3      |  | 0,089439317  | 0 | N.A. | 0 |
| GABRD       |  | -0,080218077 | 0 | N.A. | 0 |

|            |  |              |   |      |   |
|------------|--|--------------|---|------|---|
| GABRG3     |  |              | 0 | N.A. | 0 |
| GABRQ      |  |              | 0 | N.A. | 0 |
| GABRR1     |  | -0,018307101 | 0 | N.A. | 0 |
| GADL1      |  |              | 0 | N.A. | 0 |
| GAF3       |  | 0,2607463    | 0 | N.A. | 0 |
| GAGE10     |  |              | 0 | N.A. | 0 |
| GAL3ST2    |  | -0,11173399  | 0 | N.A. | 0 |
| GAL3ST3    |  |              | 0 | N.A. | 0 |
| GALNT13    |  |              | 0 | N.A. | 0 |
| GALNT15    |  | 0,001802683  | 0 | N.A. | 0 |
| GALR1      |  |              | 0 | N.A. | 0 |
| GAP43      |  |              | 0 | N.A. | 0 |
| GAPDHS     |  |              | 0 | N.A. | 0 |
| GAPT       |  | -0,15936099  | 0 | N.A. | 0 |
| GAS8-AS1   |  | -0,036120294 | 0 | N.A. | 0 |
| GATA1      |  |              | 0 | N.A. | 0 |
| GATA5      |  |              | 0 | N.A. | 0 |
| GATSL2     |  | 0,259189226  | 0 | N.A. | 0 |
| GBP6       |  | 0,244280816  | 0 | N.A. | 0 |
| GBP7       |  | -0,042226885 | 0 | N.A. | 0 |
| GC         |  | 0,18726914   | 0 | N.A. | 0 |
| GCGR       |  | 0,030074965  | 0 | N.A. | 0 |
| GCKR       |  |              | 0 | N.A. | 0 |
| GCM1       |  |              | 0 | N.A. | 0 |
| GCSAM      |  |              | 0 | N.A. | 0 |
| GCSAML     |  | -0,086047992 | 0 | N.A. | 0 |
| GCSAML-AS1 |  |              | 0 | N.A. | 0 |
| GDAP1L1    |  |              | 0 | N.A. | 0 |
| GDF3       |  |              | 0 | N.A. | 0 |
| GDF5       |  |              | 0 | N.A. | 0 |
| GDF5OS     |  |              | 0 | N.A. | 0 |
| GDF6       |  |              | 0 | N.A. | 0 |
| GDF7       |  |              | 0 | N.A. | 0 |

|          |  |              |   |      |   |
|----------|--|--------------|---|------|---|
| GDNF     |  |              | 0 | N.A. | 0 |
| GDNF-AS1 |  |              | 0 | N.A. | 0 |
| GDPD4    |  | 0,062658061  | 0 | N.A. | 0 |
| GFRA2    |  |              | 0 | N.A. | 0 |
| GFRA3    |  |              | 0 | N.A. | 0 |
| GGTLC1   |  | 0,284137373  | 0 | N.A. | 0 |
| GH1      |  |              | 0 | N.A. | 0 |
| GHRHR    |  | 0,014871809  | 0 | N.A. | 0 |
| GIMAP6   |  | 0,003154696  | 0 | N.A. | 0 |
| GIMAP8   |  |              | 0 | N.A. | 0 |
| GIP      |  | 0,237871634  | 0 | N.A. | 0 |
| GIPC3    |  |              | 0 | N.A. | 0 |
| GJA5     |  |              | 0 | N.A. | 0 |
| GJB7     |  | 0,134236857  | 0 | N.A. | 0 |
| GJD3     |  |              | 0 | N.A. | 0 |
| GJD4     |  |              | 0 | N.A. | 0 |
| GKN2     |  |              | 0 | N.A. | 0 |
| GLI3     |  | -0,04228731  | 0 | N.A. | 0 |
| GLIPR1L1 |  |              | 0 | N.A. | 0 |
| GLIS1    |  |              | 0 | N.A. | 0 |
| GLP2R    |  |              | 0 | N.A. | 0 |
| GLRA1    |  |              | 0 | N.A. | 0 |
| GLRA3    |  |              | 0 | N.A. | 0 |
| GLRB     |  |              | 0 | N.A. | 0 |
| GLT1D1   |  | 0,374153739  | 0 | N.A. | 0 |
| GLUD2    |  | -0,107421204 | 0 | N.A. | 0 |
| GLYAT    |  |              | 0 | N.A. | 0 |
| GLYATL2  |  |              | 0 | N.A. | 0 |
| GML      |  |              | 0 | N.A. | 0 |
| GNAT1    |  |              | 0 | N.A. | 0 |
| GNAT2    |  | -0,295524546 | 0 | N.A. | 0 |
| GNG3     |  |              | 0 | N.A. | 0 |
| GNRH2    |  |              | 0 | N.A. | 0 |

|          |  |              |   |      |   |
|----------|--|--------------|---|------|---|
| GOLGA6L1 |  |              | 0 | N.A. | 0 |
| GOLGA6L6 |  |              | 0 | N.A. | 0 |
| GOLGA8G  |  |              | 0 | N.A. | 0 |
| GOLGA8H  |  |              | 0 | N.A. | 0 |
| GOLGA8M  |  |              | 0 | N.A. | 0 |
| GOLGA8Q  |  | -0,032138145 | 0 | N.A. | 0 |
| GOLGA8S  |  | 0,34389655   | 0 | N.A. | 0 |
| GOT1L1   |  |              | 0 | N.A. | 0 |
| GP5      |  |              | 0 | N.A. | 0 |
| GP9      |  |              | 0 | N.A. | 0 |
| GPAT2    |  | -0,198857481 | 0 | N.A. | 0 |
| GPC5     |  |              | 0 | N.A. | 0 |
| GPC6     |  | 0,057820363  | 0 | N.A. | 0 |
| GPHA2    |  |              | 0 | N.A. | 0 |
| GPIHBP1  |  |              | 0 | N.A. | 0 |
| GPM6A    |  |              | 0 | N.A. | 0 |
| GPR1     |  |              | 0 | N.A. | 0 |
| GPR111   |  |              | 0 | N.A. | 0 |
| GPR116   |  | 0,169820266  | 0 | N.A. | 0 |
| GPR12    |  |              | 0 | N.A. | 0 |
| GPR141   |  | 0,089715331  | 0 | N.A. | 0 |
| GPR142   |  | -0,195763393 | 0 | N.A. | 0 |
| GPR15    |  |              | 0 | N.A. | 0 |
| GPR156   |  |              | 0 | N.A. | 0 |
| GPR174   |  |              | 0 | N.A. | 0 |
| GPR179   |  |              | 0 | N.A. | 0 |
| GPR182   |  |              | 0 | N.A. | 0 |
| GPR21    |  |              | 0 | N.A. | 0 |
| GPR22    |  | -0,082307229 | 0 | N.A. | 0 |
| GPR27    |  |              | 0 | N.A. | 0 |
| GPR31    |  | -0,094053427 | 0 | N.A. | 0 |
| GPR34    |  | -0,368580876 | 0 | N.A. | 0 |
| GPR42    |  |              | 0 | N.A. | 0 |

|              |  |              |   |      |   |
|--------------|--|--------------|---|------|---|
| GPR52        |  |              | 0 | N.A. | 0 |
| GPR61        |  | 0,044211482  | 0 | N.A. | 0 |
| GPR62        |  |              | 0 | N.A. | 0 |
| GPR68        |  | 0,075301832  | 0 | N.A. | 0 |
| GPR78        |  |              | 0 | N.A. | 0 |
| GPR88        |  | -0,143942637 | 0 | N.A. | 0 |
| GPR97        |  |              | 0 | N.A. | 0 |
| GREM2        |  | -0,04779246  | 0 | N.A. | 0 |
| GRIA3        |  |              | 0 | N.A. | 0 |
| GRIA4        |  |              | 0 | N.A. | 0 |
| GRID2        |  | -0,025234084 | 0 | N.A. | 0 |
| GRIK1-AS1    |  |              | 0 | N.A. | 0 |
| GRIK3        |  |              | 0 | N.A. | 0 |
| GRIK5        |  | 0,068107124  | 0 | N.A. | 0 |
| GRIN2A       |  |              | 0 | N.A. | 0 |
| GRIN3B       |  |              | 0 | N.A. | 0 |
| GRM2         |  |              | 0 | N.A. | 0 |
| GRM5         |  |              | 0 | N.A. | 0 |
| GRM7-AS1     |  |              | 0 | N.A. | 0 |
| GRP          |  |              | 0 | N.A. | 0 |
| GRPEL2-AS1   |  |              | 0 | N.A. | 0 |
| GRPR         |  |              | 0 | N.A. | 0 |
| GS1-114I9.3  |  |              | 0 | N.A. | 0 |
| GS1-120K12.4 |  | 0,082061365  | 0 | N.A. | 0 |
| GS1-166A23.1 |  | 0,014443976  | 0 | N.A. | 0 |
| GS1-204I12.4 |  | 0,000133094  | 0 | N.A. | 0 |
| GS1-24F4.2   |  |              | 0 | N.A. | 0 |
| GS1-304P7.3  |  |              | 0 | N.A. | 0 |
| GS1-57L11.1  |  | 0,151424471  | 0 | N.A. | 0 |
| GS1-72M22.1  |  | -0,05245725  | 0 | N.A. | 0 |
| GSDMC        |  | 0,156228396  | 0 | N.A. | 0 |
| GSG1         |  |              | 0 | N.A. | 0 |
| GSG1L        |  |              | 0 | N.A. | 0 |

|            |  |              |   |      |   |
|------------|--|--------------|---|------|---|
| GSTA2      |  |              | 1 | none | 0 |
| GSTM1      |  | -0,269249097 | 0 | N.A. | 0 |
| GSTM5      |  | -0,0247584   | 0 | N.A. | 0 |
| GTF2A1L    |  |              | 0 | N.A. | 0 |
| GTF3C2-AS1 |  | -0,00166296  | 0 | N.A. | 0 |
| GTSCR1     |  |              | 0 | N.A. | 0 |
| GTSF1      |  | -0,005704487 | 0 | N.A. | 0 |
| GTSF1L     |  |              | 0 | N.A. | 0 |
| GUCA1A     |  | -0,223969799 | 0 | N.A. | 0 |
| GUCA1B     |  | 0,050472017  | 0 | N.A. | 0 |
| GUCY1B3    |  |              | 0 | N.A. | 0 |
| GUCY2F     |  |              | 0 | N.A. | 0 |
| GYPB       |  |              | 0 | N.A. | 0 |
| GYPE       |  |              | 0 | N.A. | 0 |
| H2AFB1     |  |              | 0 | N.A. | 0 |
| H2BFM      |  |              | 0 | N.A. | 0 |
| HAND1      |  |              | 0 | N.A. | 0 |
| HAND2      |  | -0,109964216 | 0 | N.A. | 0 |
| HAO1       |  | 0,074120493  | 0 | N.A. | 0 |
| HAO2       |  |              | 0 | N.A. | 0 |
| HAPLN2     |  | 0,048683863  | 0 | N.A. | 0 |
| HAPLN4     |  | 0,161501152  | 0 | N.A. | 0 |
| HAS1       |  | -0,077078527 | 0 | N.A. | 0 |
| HBD        |  |              | 0 | N.A. | 0 |
| HBG2       |  | 0,048148047  | 0 | N.A. | 0 |
| HBM        |  |              | 0 | N.A. | 0 |
| HBQ1       |  | -0,315595948 | 0 | N.A. | 0 |
| HBZ        |  |              | 0 | N.A. | 0 |
| HCCAT5     |  |              | 0 | N.A. | 0 |
| HCFC1-AS1  |  |              | 0 | N.A. | 0 |
| HCG16      |  |              | 0 | N.A. | 0 |
| HCG21      |  |              | 0 | N.A. | 0 |
| HCG22      |  |              | 0 | N.A. | 0 |



|                |  |              |   |      |   |
|----------------|--|--------------|---|------|---|
| HCG23          |  |              | 0 | N.A. | 0 |
| HCN1           |  | 0,059381636  | 0 | N.A. | 0 |
| HCN4           |  | 0,269706999  | 0 | N.A. | 0 |
| HCRTR1         |  |              | 0 | N.A. | 0 |
| HCRTR2         |  |              | 0 | N.A. | 0 |
| HEATR9         |  |              | 0 | N.A. | 0 |
| HEMGN          |  |              | 0 | N.A. | 0 |
| HEPACAM        |  |              | 0 | N.A. | 0 |
| HEPN1          |  |              | 0 | N.A. | 0 |
| HFE2           |  |              | 0 | N.A. | 0 |
| HFM1           |  | -0,000928656 | 0 | N.A. | 0 |
| HGF            |  |              | 0 | N.A. | 0 |
| HHIP           |  |              | 0 | N.A. | 0 |
| HHIPL2         |  |              | 0 | N.A. | 0 |
| HHLA1          |  | 0,352229869  | 0 | N.A. | 0 |
| HID1-AS1       |  |              | 0 | N.A. | 0 |
| HIF1A-AS1      |  |              | 0 | N.A. | 0 |
| HIGD1B         |  | -0,101869378 | 0 | N.A. | 0 |
| HIPK4          |  |              | 0 | N.A. | 0 |
| HIST1H1A       |  |              | 0 | N.A. | 0 |
| HIST1H1T       |  |              | 0 | N.A. | 0 |
| HIST1H4F       |  |              | 0 | N.A. | 0 |
| HIST1H4L       |  | -0,075746223 | 0 | N.A. | 0 |
| HIST2H3PS2     |  |              | 0 | N.A. | 0 |
| HK3            |  | -0,075287494 | 0 | N.A. | 0 |
| HLA-DQB1-AS1   |  |              | 0 | N.A. | 0 |
| HLX-AS1        |  |              | 0 | N.A. | 0 |
| HMGCLL1        |  |              | 0 | N.A. | 0 |
| HMHB1          |  |              | 0 | N.A. | 0 |
| HMP19          |  |              | 0 | N.A. | 0 |
| HMX2           |  |              | 0 | N.A. | 0 |
| HNRNPUL2-BSCL2 |  | 0,014071285  | 0 | N.A. | 0 |
| HORMAD2        |  |              | 0 | N.A. | 0 |

|             |              |   |      |   |
|-------------|--------------|---|------|---|
| HORMAD2-AS1 |              | 0 | N.A. | 0 |
| HOXB-AS2    |              | 0 | N.A. | 0 |
| HOXB1       | 0,039305884  | 0 | N.A. | 0 |
| HOXC-AS1    |              | 0 | N.A. | 0 |
| HOXC12      |              | 0 | N.A. | 0 |
| HOXC13      | 0,340769968  | 0 | N.A. | 0 |
| HP          |              | 0 | N.A. | 0 |
| HP09025     |              | 0 | N.A. | 0 |
| HPCAL4      | -0,068586    | 0 | N.A. | 0 |
| HPD         |              | 0 | N.A. | 0 |
| HPN-AS1     |              | 0 | N.A. | 0 |
| HPR         |              | 0 | N.A. | 0 |
| HPSE2       |              | 0 | N.A. | 0 |
| HRG         | 0,076765674  | 0 | N.A. | 0 |
| HRH2        |              | 0 | N.A. | 0 |
| HRH4        | 0,047156587  | 0 | N.A. | 0 |
| HRNR        | 0,335806186  | 0 | N.A. | 0 |
| HS3ST2      | 0,460177339  | 0 | N.A. | 0 |
| HS3ST3A1    |              | 0 | N.A. | 0 |
| HSD11B1     | 0,231837217  | 0 | N.A. | 0 |
| HSD3B1      | 0,068526457  | 0 | N.A. | 0 |
| HSD3B2      |              | 0 | N.A. | 0 |
| HSF5        |              | 0 | N.A. | 0 |
| HSPA12B     | 0,084962858  | 0 | N.A. | 0 |
| HSPB2       |              | 0 | N.A. | 0 |
| HSPE1-MOB4  | 0,117225074  | 0 | N.A. | 0 |
| HTN1        |              | 0 | N.A. | 0 |
| HTR2B       | -0,047203356 | 0 | N.A. | 0 |
| HTR3C       |              | 0 | N.A. | 0 |
| HTR6        | 0,136022464  | 0 | N.A. | 0 |
| HTR7        |              | 0 | N.A. | 0 |
| HYAL4       | 0,275571916  | 0 | N.A. | 0 |
| HZGJ        |              | 0 | N.A. | 0 |

|             |  |              |   |      |   |
|-------------|--|--------------|---|------|---|
| IBA57-AS1   |  | 0,078120771  | 0 | N.A. | 0 |
| IBSP        |  | -0,239893348 | 0 | N.A. | 0 |
| IDI2        |  | 0,047932409  | 0 | N.A. | 0 |
| IDO2        |  |              | 0 | N.A. | 0 |
| IFNB1       |  |              | 0 | N.A. | 0 |
| IFNE        |  | 0,430719971  | 0 | N.A. | 0 |
| IFNG-AS1    |  | -0,225163244 | 0 | N.A. | 0 |
| IGDCC4      |  |              | 0 | N.A. | 0 |
| IGFBP7-AS1  |  |              | 0 | N.A. | 0 |
| IGFL3       |  |              | 0 | N.A. | 0 |
| IGFN1       |  | 0,092740075  | 0 | N.A. | 0 |
| IGHE        |  |              | 0 | N.A. | 0 |
| IGHEP1      |  |              | 0 | N.A. | 0 |
| IGHEP2      |  |              | 0 | N.A. | 0 |
| IGHV1-12    |  |              | 0 | N.A. | 0 |
| IGHV1-14    |  |              | 0 | N.A. | 0 |
| IGHV1-17    |  |              | 0 | N.A. | 0 |
| IGHV1-3     |  |              | 0 | N.A. | 0 |
| IGHV1-45    |  |              | 0 | N.A. | 0 |
| IGHV1-46    |  |              | 0 | N.A. | 0 |
| IGHV1-58    |  |              | 0 | N.A. | 0 |
| IGHV1-67    |  |              | 0 | N.A. | 0 |
| IGHV1-69    |  |              | 0 | N.A. | 0 |
| IGHV1OR15-2 |  |              | 0 | N.A. | 0 |
| IGHV1OR15-9 |  |              | 0 | N.A. | 0 |
| IGHV2-26    |  |              | 0 | N.A. | 0 |
| IGHV2-70    |  | -0,078534737 | 0 | N.A. | 0 |
| IGHV2OR16-5 |  |              | 0 | N.A. | 0 |
| IGHV3-11    |  | -0,261928123 | 0 | N.A. | 0 |
| IGHV3-13    |  |              | 0 | N.A. | 0 |
| IGHV3-19    |  |              | 0 | N.A. | 0 |
| IGHV3-20    |  |              | 0 | N.A. | 0 |
| IGHV3-22    |  |              | 0 | N.A. | 0 |

|              |  |              |   |      |   |
|--------------|--|--------------|---|------|---|
| IGHV3-33     |  |              | 0 | N.A. | 0 |
| IGHV3-35     |  |              | 0 | N.A. | 0 |
| IGHV3-41     |  |              | 0 | N.A. | 0 |
| IGHV3-42     |  |              | 0 | N.A. | 0 |
| IGHV3-52     |  |              | 0 | N.A. | 0 |
| IGHV3-62     |  |              | 0 | N.A. | 0 |
| IGHV3-64     |  |              | 0 | N.A. | 0 |
| IGHV3-71     |  |              | 0 | N.A. | 0 |
| IGHV3-72     |  |              | 0 | N.A. | 0 |
| IGHV3OR15-7  |  |              | 0 | N.A. | 0 |
| IGHV3OR16-13 |  |              | 0 | N.A. | 0 |
| IGHV3OR16-8  |  |              | 0 | N.A. | 0 |
| IGHV3OR16-9  |  |              | 0 | N.A. | 0 |
| IGHV4-28     |  |              | 0 | N.A. | 0 |
| IGHV4-31     |  |              | 0 | N.A. | 0 |
| IGHV4-4      |  |              | 0 | N.A. | 0 |
| IGHV4-55     |  |              | 0 | N.A. | 0 |
| IGHV4-61     |  | -0,225163244 | 0 | N.A. | 0 |
| IGHV5-78     |  | -0,000597916 | 0 | N.A. | 0 |
| IGHV6-1      |  |              | 0 | N.A. | 0 |
| IGHV7-34-1   |  |              | 0 | N.A. | 0 |
| IGKV1-13     |  |              | 0 | N.A. | 0 |
| IGKV1-9      |  |              | 0 | N.A. | 0 |
| IGKV1D-12    |  |              | 0 | N.A. | 0 |
| IGKV1D-13    |  |              | 0 | N.A. | 0 |
| IGKV1D-16    |  |              | 0 | N.A. | 0 |
| IGKV1D-33    |  |              | 0 | N.A. | 0 |
| IGKV1D-37    |  |              | 0 | N.A. | 0 |
| IGKV1D-39    |  |              | 0 | N.A. | 0 |
| IGKV1D-42    |  |              | 0 | N.A. | 0 |
| IGKV1D-43    |  |              | 0 | N.A. | 0 |
| IGKV1D-8     |  | -0,291545473 | 0 | N.A. | 0 |
| IGKV1OR-2    |  |              | 0 | N.A. | 0 |

|              |  |              |      |   |
|--------------|--|--------------|------|---|
| IGKV1OR2-108 |  | 0            | N.A. | 0 |
| IGKV2-18     |  | 0            | N.A. | 0 |
| IGKV2-26     |  | 0            | N.A. | 0 |
| IGKV2-28     |  | 0            | N.A. | 0 |
| IGKV2-29     |  | 0            | N.A. | 0 |
| IGKV2D-28    |  | 0            | N.A. | 0 |
| IGKV2D-29    |  | 0            | N.A. | 0 |
| IGKV2D-30    |  | 0            | N.A. | 0 |
| IGKV2D-40    |  | 0            | N.A. | 0 |
| IGKV2OR22-3  |  | 0            | N.A. | 0 |
| IGKV2OR22-4  |  | 0            | N.A. | 0 |
| IGKV3-7      |  | 0            | N.A. | 0 |
| IGKV3D-11    |  | 0            | N.A. | 0 |
| IGKV3D-15    |  | 0            | N.A. | 0 |
| IGKV3D-20    |  | 0            | N.A. | 0 |
| IGKV3OR2-268 |  | 0            | N.A. | 0 |
| IGKV5-2      |  | 0            | N.A. | 0 |
| IGKV6D-21    |  | 0            | N.A. | 0 |
| IGKV6D-41    |  | 0            | N.A. | 0 |
| IGKV7-3      |  | 0            | N.A. | 0 |
| IGLC4        |  | 0            | N.A. | 0 |
| IGLC5        |  | 0            | N.A. | 0 |
| IGLC6        |  | 0            | N.A. | 0 |
| IGLJCOR18    |  | 0            | N.A. | 0 |
| IGLV1-36     |  | 0            | N.A. | 0 |
| IGLV1-41     |  | -0,035408727 | N.A. | 0 |
| IGLV1-50     |  | 0            | N.A. | 0 |
| IGLV10-54    |  | 0            | N.A. | 0 |
| IGLV11-55    |  | 0            | N.A. | 0 |
| IGLV2-18     |  | 0            | N.A. | 0 |
| IGLV2-28     |  | 0            | N.A. | 0 |
| IGLV2-34     |  | 0            | N.A. | 0 |
| IGLV2-5      |  | 0            | N.A. | 0 |

|             |  |              |   |      |   |
|-------------|--|--------------|---|------|---|
| IGLV3-12    |  |              | 0 | N.A. | 0 |
| IGLV3-16    |  |              | 0 | N.A. | 0 |
| IGLV3-27    |  |              | 0 | N.A. | 0 |
| IGLV4-3     |  |              | 0 | N.A. | 0 |
| IGLV4-60    |  |              | 0 | N.A. | 0 |
| IGLV4-69    |  |              | 0 | N.A. | 0 |
| IGLV5-37    |  |              | 0 | N.A. | 0 |
| IGLV5-45    |  |              | 0 | N.A. | 0 |
| IGLV5-48    |  |              | 0 | N.A. | 0 |
| IGLV5-52    |  | 0,373897891  | 0 | N.A. | 0 |
| IGLV7-35    |  |              | 0 | N.A. | 0 |
| IGLV7-43    |  | -0,013291443 | 0 | N.A. | 0 |
| IGLV7-46    |  | -0,111727881 | 0 | N.A. | 0 |
| IGLV9-49    |  |              | 0 | N.A. | 0 |
| IGLVI-70    |  |              | 0 | N.A. | 0 |
| IGLVIV-66-1 |  |              | 0 | N.A. | 0 |
| IGSF10      |  |              | 0 | N.A. | 0 |
| IGSF11      |  | -0,05648196  | 0 | N.A. | 0 |
| IGSF21      |  |              | 0 | N.A. | 0 |
| IGSF5       |  | 0,376867434  | 0 | N.A. | 0 |
| IL12A-AS1   |  |              | 0 | N.A. | 0 |
| IL12B       |  |              | 0 | N.A. | 0 |
| IL12RB2     |  | -0,057605904 | 0 | N.A. | 0 |
| IL13        |  |              | 0 | N.A. | 0 |
| IL17B       |  | -0,075670816 | 0 | N.A. | 0 |
| IL17F       |  |              | 0 | N.A. | 0 |
| IL19        |  |              | 0 | N.A. | 0 |
| IL1RAPL1    |  |              | 0 | N.A. | 0 |
| IL1RAPL2    |  |              | 0 | N.A. | 0 |
| IL20        |  |              | 0 | N.A. | 0 |
| IL21        |  |              | 0 | N.A. | 0 |
| IL21-AS1    |  |              | 0 | N.A. | 0 |
| IL21R-AS1   |  | 0,03408571   | 0 | N.A. | 0 |

|                 |  |              |   |      |   |
|-----------------|--|--------------|---|------|---|
| IL22RA2         |  |              | 0 | N.A. | 0 |
| IL25            |  |              | 0 | N.A. | 0 |
| IL27            |  |              | 0 | N.A. | 0 |
| IL3             |  |              | 0 | N.A. | 0 |
| IL36B           |  |              | 0 | N.A. | 0 |
| IL4             |  |              | 0 | N.A. | 0 |
| IL5RA           |  |              | 0 | N.A. | 0 |
| IL9R            |  |              | 0 | N.A. | 0 |
| IMPG1           |  |              | 0 | N.A. | 0 |
| INA             |  |              | 0 | N.A. | 0 |
| INHA            |  |              | 0 | N.A. | 0 |
| INMT-FAM188B    |  |              | 0 | N.A. | 0 |
| INSL3           |  |              | 0 | N.A. | 0 |
| INSM2           |  |              | 0 | N.A. | 0 |
| IP6K3           |  |              | 0 | N.A. | 0 |
| IQCA1           |  |              | 0 | N.A. | 0 |
| IQCA1-AS1       |  |              | 0 | N.A. | 0 |
| IQCF1           |  | 0,356104625  | 0 | N.A. | 0 |
| IQCJ-SCHIP1     |  | -0,036843357 | 0 | N.A. | 0 |
| IQCJ-SCHIP1-AS1 |  |              | 0 | N.A. | 0 |
| IQSEC3          |  |              | 0 | N.A. | 0 |
| IRG1            |  |              | 0 | N.A. | 0 |
| IRGC            |  |              | 0 | N.A. | 0 |
| IRGM            |  |              | 0 | N.A. | 0 |
| IRX1            |  |              | 0 | N.A. | 0 |
| IRX6            |  |              | 0 | N.A. | 0 |
| ISLR2           |  |              | 0 | N.A. | 0 |
| ISM1            |  |              | 0 | N.A. | 0 |
| ISM1-AS1        |  |              | 0 | N.A. | 0 |
| ITGA8           |  |              | 0 | N.A. | 0 |
| ITGAD           |  |              | 0 | N.A. | 0 |
| ITGB5-AS1       |  |              | 0 | N.A. | 0 |
| ITIH1           |  |              | 0 | N.A. | 0 |

|              |  |              |   |      |   |
|--------------|--|--------------|---|------|---|
| ITIH2        |  |              | 0 | N.A. | 0 |
| ITIH3        |  |              | 0 | N.A. | 0 |
| ITIH4        |  |              | 0 | N.A. | 0 |
| ITIH6        |  | -0,082069374 | 0 | N.A. | 0 |
| ITPR1-AS1    |  |              | 0 | N.A. | 0 |
| IVL          |  | -0,015981438 | 0 | N.A. | 0 |
| JADRR        |  |              | 0 | N.A. | 0 |
| JAKMIP2      |  | 0,142471726  | 0 | N.A. | 0 |
| JAKMIP3      |  |              | 0 | N.A. | 0 |
| JAZF1-AS1    |  |              | 0 | N.A. | 0 |
| JMJD7        |  |              | 0 | N.A. | 0 |
| JPH2         |  |              | 0 | N.A. | 0 |
| JPH3         |  |              | 0 | N.A. | 0 |
| KANK4        |  |              | 0 | N.A. | 0 |
| KB-1043D8.6  |  |              | 0 | N.A. | 0 |
| KB-1107E3.1  |  |              | 0 | N.A. | 0 |
| KB-1184D12.1 |  | 0,197054287  | 0 | N.A. | 0 |
| KB-1254G8.1  |  | -0,047274872 | 0 | N.A. | 0 |
| KB-1410C5.3  |  | 0,214531827  | 0 | N.A. | 0 |
| KB-1440D3.14 |  |              | 0 | N.A. | 0 |
| KB-1448A5.1  |  |              | 0 | N.A. | 0 |
| KB-1458E12.1 |  |              | 0 | N.A. | 0 |
| KB-1466C5.1  |  |              | 0 | N.A. | 0 |
| KB-1507C5.3  |  |              | 0 | N.A. | 0 |
| KB-1507C5.4  |  | 0,101741538  | 0 | N.A. | 0 |
| KB-1592A4.15 |  |              | 0 | N.A. | 0 |
| KB-1615E4.3  |  |              | 0 | N.A. | 0 |
| KB-173C10.1  |  |              | 0 | N.A. | 0 |
| KB-173C10.2  |  |              | 0 | N.A. | 0 |
| KB-1836B5.4  |  |              | 0 | N.A. | 0 |
| KB-431C1.5   |  |              | 0 | N.A. | 0 |
| KC6          |  |              | 0 | N.A. | 0 |
| KCNA1        |  |              | 0 | N.A. | 0 |



|            |  |              |   |      |   |
|------------|--|--------------|---|------|---|
| KCNA2      |  |              | 0 | N.A. | 0 |
| KCNA3      |  | -0,288993621 | 0 | N.A. | 0 |
| KCNA5      |  |              | 0 | N.A. | 0 |
| KCNAB1     |  | 0,177532633  | 0 | N.A. | 0 |
| KCNB1      |  |              | 0 | N.A. | 0 |
| KCNB2      |  |              | 0 | N.A. | 0 |
| KCNC1      |  |              | 0 | N.A. | 0 |
| KCNC4-AS1  |  |              | 0 | N.A. | 0 |
| KCNG2      |  |              | 0 | N.A. | 0 |
| KCNH1      |  |              | 0 | N.A. | 0 |
| KCNH3      |  | 0,303038183  | 0 | N.A. | 0 |
| KCNH4      |  | -0,078184381 | 0 | N.A. | 0 |
| KCNIP1     |  |              | 0 | N.A. | 0 |
| KCNIP4-IT1 |  |              | 0 | N.A. | 0 |
| KCNJ1      |  |              | 0 | N.A. | 0 |
| KCNJ10     |  |              | 0 | N.A. | 0 |
| KCNJ13     |  | -0,083695745 | 0 | N.A. | 0 |
| KCNJ15     |  |              | 0 | N.A. | 0 |
| KCNJ18     |  |              | 0 | N.A. | 0 |
| KCNK13     |  |              | 0 | N.A. | 0 |
| KCNK2      |  |              | 0 | N.A. | 0 |
| KCNK3      |  | -0,060508802 | 1 | none | 0 |
| KCNK4      |  | 0,054655736  | 0 | N.A. | 0 |
| KCNMA1-AS1 |  |              | 0 | N.A. | 0 |
| KCNMA1-AS3 |  |              | 0 | N.A. | 0 |
| KCNQ2      |  | -0,177297527 | 0 | N.A. | 0 |
| KCNQ5      |  |              | 0 | N.A. | 0 |
| KCNS1      |  |              | 0 | N.A. | 0 |
| KCNS2      |  |              | 0 | N.A. | 0 |
| KCNT1      |  |              | 0 | N.A. | 0 |
| KCNT2      |  |              | 0 | N.A. | 0 |
| KCTD19     |  | -0,017987591 | 0 | N.A. | 0 |
| KCTD4      |  |              | 0 | N.A. | 0 |

|            |  |             |   |      |   |
|------------|--|-------------|---|------|---|
| KCTD8      |  |             | 0 | N.A. | 0 |
| KEL        |  |             | 0 | N.A. | 0 |
| KERA       |  |             | 0 | N.A. | 0 |
| KHDC1L     |  | 0,008318853 | 0 | N.A. | 0 |
| KHDRBS2    |  |             | 0 | N.A. | 0 |
| KIAA0408   |  |             | 0 | N.A. | 0 |
| KIAA1024L  |  |             | 0 | N.A. | 0 |
| KIAA1045   |  |             | 0 | N.A. | 0 |
| KIAA1210   |  |             | 0 | N.A. | 0 |
| KIAA1644   |  |             | 0 | N.A. | 0 |
| KIAA1731NL |  | 0,268866575 | 0 | N.A. | 0 |
| KIAA2022   |  |             | 0 | N.A. | 0 |
| KIF25-AS1  |  |             | 0 | N.A. | 0 |
| KIF4B      |  | 0,275485585 | 0 | N.A. | 0 |
| KIF5A      |  | 0,360802572 | 0 | N.A. | 0 |
| KIF6       |  |             | 0 | N.A. | 0 |
| KIR2DL1    |  |             | 0 | N.A. | 0 |
| KIR2DL3    |  |             | 0 | N.A. | 0 |
| KIR3DL1    |  |             | 0 | N.A. | 0 |
| KIR3DL2    |  |             | 0 | N.A. | 0 |
| KIR3DL3    |  |             | 0 | N.A. | 0 |
| KIRREL2    |  |             | 0 | N.A. | 0 |
| KLF14      |  |             | 0 | N.A. | 0 |
| KLF17      |  |             | 0 | N.A. | 0 |
| KLHDC8A    |  | 0,206122488 | 0 | N.A. | 0 |
| KLHL1      |  |             | 0 | N.A. | 0 |
| KLHL10     |  |             | 0 | N.A. | 0 |
| KLHL14     |  |             | 0 | N.A. | 0 |
| KLHL30     |  | 0,40511623  | 0 | N.A. | 0 |
| KLHL4      |  |             | 0 | N.A. | 0 |
| KLHL40     |  |             | 0 | N.A. | 0 |
| CLK9       |  |             | 0 | N.A. | 0 |
| KLRC3      |  |             | 0 | N.A. | 0 |

|             |  |              |   |      |   |
|-------------|--|--------------|---|------|---|
| KLRC4       |  |              | 0 | N.A. | 0 |
| KLRC4-KLRK1 |  |              | 0 | N.A. | 0 |
| KLRF2       |  |              | 0 | N.A. | 0 |
| KLRG2       |  | -0,355803839 | 0 | N.A. | 0 |
| KLRK1       |  |              | 0 | N.A. | 0 |
| KNCN        |  |              | 0 | N.A. | 0 |
| KRT1        |  |              | 0 | N.A. | 0 |
| KRT2        |  |              | 0 | N.A. | 0 |
| KRT222      |  | -0,200298407 | 0 | N.A. | 0 |
| KRT24       |  |              | 0 | N.A. | 0 |
| KRT27       |  |              | 0 | N.A. | 0 |
| KRT3        |  |              | 0 | N.A. | 0 |
| KRT31       |  |              | 0 | N.A. | 0 |
| KRT32       |  |              | 0 | N.A. | 0 |
| KRT33B      |  |              | 0 | N.A. | 0 |
| KRT39       |  | -0,057605904 | 0 | N.A. | 0 |
| KRT6C       |  |              | 0 | N.A. | 0 |
| KRT72       |  |              | 0 | N.A. | 0 |
| KRT73       |  |              | 0 | N.A. | 0 |
| KRT73-AS1   |  |              | 0 | N.A. | 0 |
| KRT74       |  |              | 0 | N.A. | 0 |
| KRT79       |  |              | 0 | N.A. | 0 |
| KRT84       |  |              | 0 | N.A. | 0 |
| KRT85       |  |              | 0 | N.A. | 0 |
| KRT9        |  | -0,202411877 | 0 | N.A. | 0 |
| KRTAP1-5    |  |              | 0 | N.A. | 0 |
| KRTAP10-10  |  |              | 0 | N.A. | 0 |
| KRTAP10-2   |  | 0,033784266  | 0 | N.A. | 0 |
| KRTAP12-1   |  |              | 0 | N.A. | 0 |
| KRTAP12-3   |  |              | 0 | N.A. | 0 |
| KRTAP17-1   |  |              | 0 | N.A. | 0 |
| KRTAP2-2    |  |              | 0 | N.A. | 0 |
| KRTAP21-2   |  |              | 0 | N.A. | 0 |

|                |  |              |   |      |   |
|----------------|--|--------------|---|------|---|
| KRTAP4-12      |  |              | 0 | N.A. | 0 |
| KRTAP4-8       |  |              | 0 | N.A. | 0 |
| KRTAP5-11      |  |              | 0 | N.A. | 0 |
| KRTAP5-4       |  |              | 0 | N.A. | 0 |
| KRTAP5-6       |  |              | 0 | N.A. | 0 |
| KRTAP5-7       |  |              | 0 | N.A. | 0 |
| KY             |  | 0,419462918  | 0 | N.A. | 0 |
| L29074.3       |  | -0,122608884 | 0 | N.A. | 0 |
| L34079.4       |  |              | 0 | N.A. | 0 |
| L3MBTL4-AS1    |  |              | 0 | N.A. | 0 |
| LA16c-306E5.2  |  | 0,198561538  | 0 | N.A. | 0 |
| LA16c-313D11.9 |  |              | 0 | N.A. | 0 |
| LA16c-316G12.2 |  |              | 0 | N.A. | 0 |
| LA16c-329F2.1  |  |              | 0 | N.A. | 0 |
| LA16c-359F1.1  |  |              | 0 | N.A. | 0 |
| LA16c-360A4.1  |  |              | 0 | N.A. | 0 |
| LA16c-360H6.3  |  |              | 0 | N.A. | 0 |
| LA16c-366D1.3  |  |              | 0 | N.A. | 0 |
| LA16c-444G7.1  |  |              | 0 | N.A. | 0 |
| LA16c-83F12.6  |  |              | 0 | N.A. | 0 |
| LAMB4          |  |              | 0 | N.A. | 0 |
| LAMC3          |  |              | 0 | N.A. | 0 |
| LAMP5-AS1      |  |              | 0 | N.A. | 0 |
| LANCL1-AS1     |  |              | 0 | N.A. | 0 |
| LAX1           |  |              | 0 | N.A. | 0 |
| LBX1           |  |              | 0 | N.A. | 0 |
| LCE1B          |  |              | 0 | N.A. | 0 |
| LCE1D          |  | 0,019465074  | 0 | N.A. | 0 |
| LCMT1-AS2      |  | 0,15670665   | 0 | N.A. | 0 |
| LCN1           |  |              | 0 | N.A. | 0 |
| LCN10          |  |              | 0 | N.A. | 0 |
| LCN6           |  | 0,144607419  | 0 | N.A. | 0 |
| LCNL1          |  |              | 0 | N.A. | 0 |

|             |  |              |   |      |   |
|-------------|--|--------------|---|------|---|
| LCT         |  | -0,045242429 | 0 | N.A. | 0 |
| LDHAL6A     |  |              | 0 | N.A. | 0 |
| LDHAL6B     |  |              | 0 | N.A. | 0 |
| LDLRAD4-AS1 |  |              | 0 | N.A. | 0 |
| LDOC1       |  | 0,038696391  | 0 | N.A. | 0 |
| LECT1       |  |              | 0 | N.A. | 0 |
| LENEP       |  |              | 0 | N.A. | 0 |
| LEP         |  |              | 0 | N.A. | 0 |
| LGALS12     |  |              | 0 | N.A. | 0 |
| LGALS14     |  |              | 0 | N.A. | 0 |
| LGI1        |  |              | 0 | N.A. | 0 |
| LGI2        |  | 0,313656259  | 0 | N.A. | 0 |
| LHFPL1      |  |              | 0 | N.A. | 0 |
| LHFPL5      |  | -0,19365632  | 0 | N.A. | 0 |
| LHX2        |  |              | 0 | N.A. | 0 |
| LHX4        |  |              | 0 | N.A. | 0 |
| LHX5        |  | 0,072490566  | 0 | N.A. | 0 |
| LHX6        |  |              | 0 | N.A. | 0 |
| LHX8        |  |              | 0 | N.A. | 0 |
| LHX9        |  |              | 0 | N.A. | 0 |
| LIFR-AS1    |  |              | 0 | N.A. | 0 |
| LILRA1      |  |              | 0 | N.A. | 0 |
| LILRA4      |  |              | 0 | N.A. | 0 |
| LILRA6      |  | 0,089146849  | 0 | N.A. | 0 |
| LILRB5      |  | 0,068107124  | 0 | N.A. | 0 |
| LIM2        |  |              | 0 | N.A. | 0 |
| LIMD1-AS1   |  | -0,059431967 | 0 | N.A. | 0 |
| LIME1       |  | -0,181121351 | 0 | N.A. | 0 |
| LIMS3       |  |              | 0 | N.A. | 0 |
| LIMS3L      |  |              | 0 | N.A. | 0 |
| LIN28A      |  |              | 0 | N.A. | 0 |
| LINC-ROR    |  | -0,225575871 | 0 | N.A. | 0 |
| LINC00028   |  |              | 0 | N.A. | 0 |

|              |  |              |   |      |   |
|--------------|--|--------------|---|------|---|
| LINC00032    |  |              | 0 | N.A. | 0 |
| LINC00087    |  |              | 0 | N.A. | 0 |
| LINC00092    |  |              | 0 | N.A. | 0 |
| LINC00102    |  |              | 0 | N.A. | 0 |
| LINC00111    |  | 0,200186235  | 0 | N.A. | 0 |
| LINC00158    |  |              | 0 | N.A. | 0 |
| LINC00159    |  |              | 0 | N.A. | 0 |
| LINC00163    |  |              | 0 | N.A. | 0 |
| LINC00165    |  |              | 0 | N.A. | 0 |
| LINC00200    |  |              | 0 | N.A. | 0 |
| LINC00211    |  |              | 0 | N.A. | 0 |
| LINC00221    |  |              | 0 | N.A. | 0 |
| LINC00222    |  |              | 0 | N.A. | 0 |
| LINC00237    |  |              | 0 | N.A. | 0 |
| LINC00264    |  |              | 0 | N.A. | 0 |
| LINC00266-4P |  | 0,010348121  | 0 | N.A. | 0 |
| LINC00271    |  | 0,025817047  | 0 | N.A. | 0 |
| LINC00278    |  | 0,130361925  | 0 | N.A. | 0 |
| LINC00298    |  |              | 0 | N.A. | 0 |
| LINC00303    |  |              | 0 | N.A. | 0 |
| LINC00305    |  |              | 0 | N.A. | 0 |
| LINC00310    |  |              | 0 | N.A. | 0 |
| LINC00311    |  |              | 0 | N.A. | 0 |
| LINC00313    |  |              | 0 | N.A. | 0 |
| LINC00316    |  | 0,085710832  | 0 | N.A. | 0 |
| LINC00319    |  |              | 0 | N.A. | 0 |
| LINC00322    |  |              | 0 | N.A. | 0 |
| LINC00327    |  |              | 0 | N.A. | 0 |
| LINC00332    |  |              | 0 | N.A. | 0 |
| LINC00345    |  |              | 0 | N.A. | 0 |
| LINC00352    |  | 0,166949078  | 0 | N.A. | 0 |
| LINC00355    |  | 0,070218576  | 0 | N.A. | 0 |
| LINC00359    |  | -0,007987439 | 0 | N.A. | 0 |

|           |  |              |   |      |   |
|-----------|--|--------------|---|------|---|
| LINC00381 |  | 0,164924072  | 0 | N.A. | 0 |
| LINC00384 |  |              | 0 | N.A. | 0 |
| LINC00390 |  | -0,016890837 | 0 | N.A. | 0 |
| LINC00397 |  |              | 0 | N.A. | 0 |
| LINC00398 |  |              | 0 | N.A. | 0 |
| LINC00403 |  |              | 0 | N.A. | 0 |
| LINC00421 |  |              | 0 | N.A. | 0 |
| LINC00423 |  |              | 0 | N.A. | 0 |
| LINC00426 |  | -0,058646116 | 0 | N.A. | 0 |
| LINC00427 |  | 0,180616052  | 0 | N.A. | 0 |
| LINC00434 |  | 0,164924072  | 0 | N.A. | 0 |
| LINC00443 |  | 0,256120872  | 0 | N.A. | 0 |
| LINC00454 |  |              | 0 | N.A. | 0 |
| LINC00458 |  | -0,265103939 | 0 | N.A. | 0 |
| LINC00461 |  | -0,177926203 | 0 | N.A. | 0 |
| LINC00462 |  | -0,299782322 | 0 | N.A. | 0 |
| LINC00463 |  | 0,082367129  | 0 | N.A. | 0 |
| LINC00470 |  |              | 0 | N.A. | 0 |
| LINC00472 |  |              | 0 | N.A. | 0 |
| LINC00473 |  |              | 0 | N.A. | 0 |
| LINC00484 |  | -0,094053427 | 0 | N.A. | 0 |
| LINC00487 |  | 0,309969438  | 0 | N.A. | 0 |
| LINC00488 |  |              | 0 | N.A. | 0 |
| LINC00491 |  |              | 0 | N.A. | 0 |
| LINC00500 |  |              | 0 | N.A. | 0 |
| LINC00506 |  |              | 0 | N.A. | 0 |
| LINC00507 |  |              | 0 | N.A. | 0 |
| LINC00517 |  |              | 0 | N.A. | 0 |
| LINC00519 |  |              | 0 | N.A. | 0 |
| LINC00521 |  |              | 0 | N.A. | 0 |
| LINC00528 |  | -0,027339268 | 0 | N.A. | 0 |
| LINC00534 |  |              | 0 | N.A. | 0 |
| LINC00536 |  | 0,081138471  | 0 | N.A. | 0 |

|           |  |              |   |      |   |
|-----------|--|--------------|---|------|---|
| LINC00538 |  | 0,178566987  | 0 | N.A. | 0 |
| LINC00544 |  |              | 0 | N.A. | 0 |
| LINC00548 |  |              | 0 | N.A. | 0 |
| LINC00551 |  |              | 0 | N.A. | 0 |
| LINC00563 |  |              | 0 | N.A. | 0 |
| LINC00565 |  |              | 0 | N.A. | 0 |
| LINC00566 |  | 0,096295576  | 0 | N.A. | 0 |
| LINC00572 |  | -0,057571338 | 0 | N.A. | 0 |
| LINC00578 |  |              | 0 | N.A. | 0 |
| LINC00581 |  |              | 0 | N.A. | 0 |
| LINC00582 |  |              | 0 | N.A. | 0 |
| LINC00593 |  |              | 0 | N.A. | 0 |
| LINC00598 |  |              | 0 | N.A. | 0 |
| LINC00601 |  |              | 0 | N.A. | 0 |
| LINC00602 |  |              | 0 | N.A. | 0 |
| LINC00604 |  |              | 0 | N.A. | 0 |
| LINC00605 |  |              | 0 | N.A. | 0 |
| LINC00619 |  | -0,050812401 | 0 | N.A. | 0 |
| LINC00620 |  |              | 0 | N.A. | 0 |
| LINC00621 |  |              | 0 | N.A. | 0 |
| LINC00624 |  | -0,053529758 | 0 | N.A. | 0 |
| LINC00626 |  |              | 0 | N.A. | 0 |
| LINC00632 |  |              | 0 | N.A. | 0 |
| LINC00636 |  |              | 0 | N.A. | 0 |
| LINC00637 |  |              | 0 | N.A. | 0 |
| LINC00640 |  |              | 0 | N.A. | 0 |
| LINC00643 |  |              | 0 | N.A. | 0 |
| LINC00648 |  |              | 0 | N.A. | 0 |
| LINC00652 |  | -0,130701951 | 0 | N.A. | 0 |
| LINC00656 |  |              | 0 | N.A. | 0 |
| LINC00664 |  |              | 0 | N.A. | 0 |
| LINC00670 |  |              | 0 | N.A. | 0 |
| LINC00677 |  |              | 0 | N.A. | 0 |



|           |  |              |   |      |   |
|-----------|--|--------------|---|------|---|
| LINC00678 |  | 0,190988487  | 0 | N.A. | 0 |
| LINC00682 |  | -0,025234084 | 0 | N.A. | 0 |
| LINC00683 |  | 0,010504664  | 0 | N.A. | 0 |
| LINC00686 |  | 0,014722007  | 0 | N.A. | 0 |
| LINC00691 |  | 0,06615666   | 0 | N.A. | 0 |
| LINC00693 |  |              | 0 | N.A. | 0 |
| LINC00698 |  | 0,272093854  | 0 | N.A. | 0 |
| LINC00706 |  |              | 0 | N.A. | 0 |
| LINC00707 |  |              | 0 | N.A. | 0 |
| LINC00839 |  |              | 0 | N.A. | 0 |
| LINC00840 |  |              | 0 | N.A. | 0 |
| LINC00844 |  |              | 0 | N.A. | 0 |
| LINC00856 |  |              | 0 | N.A. | 0 |
| LINC00866 |  |              | 0 | N.A. | 0 |
| LINC00877 |  |              | 0 | N.A. | 0 |
| LINC00883 |  | -0,029487836 | 0 | N.A. | 0 |
| LINC00890 |  |              | 0 | N.A. | 0 |
| LINC00891 |  |              | 0 | N.A. | 0 |
| LINC00895 |  | 0,327133367  | 0 | N.A. | 0 |
| LINC00900 |  |              | 0 | N.A. | 0 |
| LINC00906 |  |              | 0 | N.A. | 0 |
| LINC00908 |  |              | 0 | N.A. | 0 |
| LINC00922 |  |              | 0 | N.A. | 0 |
| LINC00925 |  |              | 0 | N.A. | 0 |
| LINC00927 |  |              | 0 | N.A. | 0 |
| LINC00929 |  |              | 0 | N.A. | 0 |
| LINC00930 |  | -0,051126337 | 0 | N.A. | 0 |
| LINC00935 |  |              | 0 | N.A. | 0 |
| LINC00939 |  | 0,24281335   | 0 | N.A. | 0 |
| LINC00940 |  | -0,108803223 | 0 | N.A. | 0 |
| LINC00961 |  |              | 0 | N.A. | 0 |
| LINC00968 |  |              | 0 | N.A. | 0 |
| LINC00970 |  | 0,09432797   | 0 | N.A. | 0 |

|           |  |              |   |      |   |
|-----------|--|--------------|---|------|---|
| LINC00971 |  |              | 0 | N.A. | 0 |
| LINC00974 |  | -0,125188335 | 0 | N.A. | 0 |
| LINC00976 |  |              | 0 | N.A. | 0 |
| LINC00977 |  |              | 0 | N.A. | 0 |
| LINC00989 |  |              | 0 | N.A. | 0 |
| LINC01010 |  |              | 0 | N.A. | 0 |
| LINC01013 |  |              | 0 | N.A. | 0 |
| LINC01018 |  |              | 0 | N.A. | 0 |
| LINC01030 |  |              | 0 | N.A. | 0 |
| LINC01031 |  |              | 0 | N.A. | 0 |
| LINC01032 |  | 0,016520309  | 0 | N.A. | 0 |
| LINC01033 |  |              | 0 | N.A. | 0 |
| LINC01034 |  | 0,218882564  | 0 | N.A. | 0 |
| LINC01036 |  |              | 0 | N.A. | 0 |
| LINC01037 |  |              | 0 | N.A. | 0 |
| LINC01046 |  |              | 0 | N.A. | 0 |
| LINC01048 |  | 0,024736465  | 0 | N.A. | 0 |
| LINC01050 |  | 0,046009322  | 0 | N.A. | 0 |
| LINC01055 |  |              | 0 | N.A. | 0 |
| LINC01058 |  |              | 0 | N.A. | 0 |
| LINC01072 |  |              | 0 | N.A. | 0 |
| LINC01080 |  | 0,234225929  | 0 | N.A. | 0 |
| LINC01082 |  |              | 0 | N.A. | 0 |
| LINC01085 |  |              | 0 | N.A. | 0 |
| LINC01093 |  |              | 0 | N.A. | 0 |
| LINC01095 |  |              | 0 | N.A. | 0 |
| LINC01096 |  | 0,034637901  | 0 | N.A. | 0 |
| LINC01097 |  |              | 0 | N.A. | 0 |
| LINC01098 |  | 0,113655057  | 0 | N.A. | 0 |
| LINC01102 |  | 0,056783282  | 0 | N.A. | 0 |
| LINC01104 |  |              | 0 | N.A. | 0 |
| LINC01111 |  |              | 0 | N.A. | 0 |
| LINC01114 |  |              | 0 | N.A. | 0 |

|           |  |              |   |      |   |
|-----------|--|--------------|---|------|---|
| LINC01119 |  |              | 0 | N.A. | 0 |
| LINC01120 |  | -0,091076015 | 0 | N.A. | 0 |
| LINC01122 |  |              | 0 | N.A. | 0 |
| LINC01135 |  |              | 0 | N.A. | 0 |
| LINC01139 |  |              | 0 | N.A. | 0 |
| LINC01140 |  | 0,101741538  | 0 | N.A. | 0 |
| LINC01142 |  |              | 0 | N.A. | 0 |
| LINC01150 |  |              | 0 | N.A. | 0 |
| LINC01154 |  |              | 0 | N.A. | 0 |
| LINC01160 |  | -0,045506036 | 0 | N.A. | 0 |
| LINC01163 |  |              | 0 | N.A. | 0 |
| LINC01166 |  | 0,011255996  | 0 | N.A. | 0 |
| LINC01168 |  |              | 0 | N.A. | 0 |
| LINC01180 |  |              | 0 | N.A. | 0 |
| LINC01185 |  |              | 0 | N.A. | 0 |
| LINC01197 |  |              | 0 | N.A. | 0 |
| LINC01204 |  |              | 0 | N.A. | 0 |
| LINC01205 |  |              | 0 | N.A. | 0 |
| LINC01206 |  |              | 0 | N.A. | 0 |
| LINC01208 |  |              | 0 | N.A. | 0 |
| LINC01210 |  | 0,144443728  | 0 | N.A. | 0 |
| LINC01219 |  | 0,138748622  | 0 | N.A. | 0 |
| LINC01227 |  | -0,213758722 | 0 | N.A. | 0 |
| LINC01228 |  | 0,06615666   | 0 | N.A. | 0 |
| LINC01229 |  |              | 0 | N.A. | 0 |
| LINC01230 |  |              | 0 | N.A. | 0 |
| LINC01233 |  |              | 0 | N.A. | 0 |
| LINC01250 |  |              | 0 | N.A. | 0 |
| LINC01251 |  |              | 0 | N.A. | 0 |
| LINC01257 |  |              | 0 | N.A. | 0 |
| LINC01262 |  |              | 0 | N.A. | 0 |
| LINC01264 |  |              | 0 | N.A. | 0 |
| LINC01265 |  |              | 0 | N.A. | 0 |

|           |  |              |   |      |   |
|-----------|--|--------------|---|------|---|
| LINC01266 |  |              | 0 | N.A. | 0 |
| LINC01267 |  |              | 0 | N.A. | 0 |
| LINC01269 |  | 0,071552306  | 0 | N.A. | 0 |
| LINC01271 |  | -0,005094042 | 0 | N.A. | 0 |
| LINC01276 |  | 0,056783282  | 0 | N.A. | 0 |
| LINC01277 |  | 0,192379733  | 0 | N.A. | 0 |
| LINC01281 |  |              | 0 | N.A. | 0 |
| LINC01282 |  |              | 0 | N.A. | 0 |
| LINC01289 |  |              | 0 | N.A. | 0 |
| LINC01293 |  |              | 0 | N.A. | 0 |
| LINC01297 |  |              | 0 | N.A. | 0 |
| LINC01299 |  |              | 0 | N.A. | 0 |
| LINC01300 |  | 0,129434834  | 0 | N.A. | 0 |
| LINC01305 |  |              | 0 | N.A. | 0 |
| LINC01314 |  |              | 0 | N.A. | 0 |
| LINC01317 |  |              | 0 | N.A. | 0 |
| LINC01323 |  |              | 0 | N.A. | 0 |
| LINC01324 |  |              | 0 | N.A. | 0 |
| LINC01330 |  |              | 0 | N.A. | 0 |
| LINC01336 |  |              | 0 | N.A. | 0 |
| LINC01337 |  |              | 0 | N.A. | 0 |
| LINC01340 |  | 0,019117864  | 0 | N.A. | 0 |
| LINC01342 |  | 0,096390144  | 0 | N.A. | 0 |
| LINC01354 |  |              | 0 | N.A. | 0 |
| LINC01361 |  | -0,048429862 | 0 | N.A. | 0 |
| LINC01362 |  | 0,057294996  | 0 | N.A. | 0 |
| LINC01366 |  |              | 0 | N.A. | 0 |
| LINC01374 |  |              | 0 | N.A. | 0 |
| LINC01381 |  |              | 0 | N.A. | 0 |
| LINC01388 |  | 0,15005184   | 0 | N.A. | 0 |
| LINC01394 |  |              | 0 | N.A. | 0 |
| LINC01395 |  |              | 0 | N.A. | 0 |
| LINC01396 |  |              | 0 | N.A. | 0 |

|           |  |              |   |      |   |
|-----------|--|--------------|---|------|---|
| LINC01399 |  | -0,109835195 | 0 | N.A. | 0 |
| LINC01402 |  |              | 0 | N.A. | 0 |
| LINC01412 |  |              | 0 | N.A. | 0 |
| LINC01413 |  | -0,259397978 | 0 | N.A. | 0 |
| LINC01415 |  |              | 0 | N.A. | 0 |
| LINC01419 |  | -0,043967284 | 0 | N.A. | 0 |
| LINC01422 |  |              | 0 | N.A. | 0 |
| LINC01423 |  |              | 0 | N.A. | 0 |
| LINC01429 |  |              | 0 | N.A. | 0 |
| LINC01435 |  | 0,062479862  | 0 | N.A. | 0 |
| LINC01441 |  | 0,02712786   | 0 | N.A. | 0 |
| LINC01446 |  |              | 0 | N.A. | 0 |
| LINC01447 |  |              | 0 | N.A. | 0 |
| LINC01452 |  | -0,08885435  | 0 | N.A. | 0 |
| LINC01470 |  |              | 0 | N.A. | 0 |
| LINC01471 |  |              | 0 | N.A. | 0 |
| LINC01474 |  | 0,172322709  | 0 | N.A. | 0 |
| LINC01475 |  |              | 0 | N.A. | 0 |
| LINC01481 |  | -0,068540659 | 0 | N.A. | 0 |
| LINC01482 |  |              | 0 | N.A. | 0 |
| LINC01484 |  |              | 0 | N.A. | 0 |
| LINC01489 |  |              | 0 | N.A. | 0 |
| LINC01492 |  |              | 0 | N.A. | 0 |
| LINC01497 |  | 0,018448765  | 0 | N.A. | 0 |
| LINC01501 |  |              | 0 | N.A. | 0 |
| LINC01502 |  |              | 0 | N.A. | 0 |
| LINC01506 |  |              | 0 | N.A. | 0 |
| LINC01507 |  |              | 0 | N.A. | 0 |
| LINC01509 |  |              | 0 | N.A. | 0 |
| LINC01513 |  | -0,015820271 | 0 | N.A. | 0 |
| LINC01516 |  |              | 0 | N.A. | 0 |
| LINC01522 |  |              | 0 | N.A. | 0 |
| LINC01527 |  |              | 0 | N.A. | 0 |

|                   |  |              |   |      |   |
|-------------------|--|--------------|---|------|---|
| LINC01529         |  |              | 0 | N.A. | 0 |
| LINC01531         |  |              | 0 | N.A. | 0 |
| LINC01535         |  | 0,205487926  | 0 | N.A. | 0 |
| LINC01537         |  |              | 0 | N.A. | 0 |
| LINC01539         |  |              | 0 | N.A. | 0 |
| LINC01543         |  |              | 0 | N.A. | 0 |
| LINC01546         |  |              | 0 | N.A. | 0 |
| LINC01548         |  | -0,174508826 | 0 | N.A. | 0 |
| LINC01561         |  |              | 0 | N.A. | 0 |
| LINC01562         |  |              | 0 | N.A. | 0 |
| LINC01563         |  |              | 0 | N.A. | 0 |
| LINC01565         |  | 0,107473348  | 0 | N.A. | 0 |
| LINC01567         |  |              | 0 | N.A. | 0 |
| LINC01568         |  |              | 0 | N.A. | 0 |
| LINC01571         |  |              | 0 | N.A. | 0 |
| LINC01574         |  | 0,193940469  | 0 | N.A. | 0 |
| LINC01583         |  |              | 0 | N.A. | 0 |
| LINGO2            |  |              | 0 | N.A. | 0 |
| LINGO4            |  |              | 0 | N.A. | 0 |
| LIPN              |  |              | 0 | N.A. | 0 |
| LIX1              |  |              | 0 | N.A. | 0 |
| LL09NC01-139C3.1  |  |              | 0 | N.A. | 0 |
| LL0XNC01-116E7.2  |  | -0,242234701 | 0 | N.A. | 0 |
| LL0XNC01-16G2.1   |  |              | 0 | N.A. | 0 |
| LL21NC02-1C16.2   |  |              | 0 | N.A. | 0 |
| LL22NC03-102D1.18 |  | 0,279454759  | 0 | N.A. | 0 |
| LL22NC03-104C7.1  |  |              | 0 | N.A. | 0 |
| LL22NC03-63E9.3   |  |              | 0 | N.A. | 0 |
| LLNLF-187D8.1     |  |              | 0 | N.A. | 0 |
| LLNLR-246C6.1     |  |              | 0 | N.A. | 0 |
| LLNLR-249E10.1    |  |              | 0 | N.A. | 0 |
| LLNLR-268E12.1    |  | 0,047523644  | 0 | N.A. | 0 |
| LLNLR-284B4.1     |  |              | 0 | N.A. | 0 |

|               |  |              |      |      |
|---------------|--|--------------|------|------|
| LLNLR-304G9.1 |  | 0            | N.A. | 0    |
| LLNLR-307A6.1 |  | 0            | N.A. | 0    |
| LLPH-AS1      |  | 0            | N.A. | 0    |
| LMF1-AS1      |  | 0            | N.A. | 0    |
| LMLN-AS1      |  | 0            | N.A. | 0    |
| LMO3          |  | 0            | N.A. | 0    |
| LMX1B         |  | 0,226239247  | 0    | N.A. |
| LONRF2        |  | 0            | N.A. | 0    |
| LOR           |  | 0            | N.A. | 0    |
| LOXHD1        |  | 0            | N.A. | 0    |
| LPA           |  | 0,3285535    | 0    | N.A. |
| LPAR3         |  | 0,081138471  | 0    | N.A. |
| LPAR4         |  | 0,005139866  | 0    | N.A. |
| LPHN3         |  | 0            | N.A. | 0    |
| LPP-AS1       |  | 0            | N.A. | 0    |
| LPPR3         |  | -0,067340679 | 0    | N.A. |
| LPPR4         |  | 0            | N.A. | 0    |
| LPPR5         |  | 0,021253186  | 0    | N.A. |
| LRCH2         |  | 0            | N.A. | 0    |
| LRCOL1        |  | -0,297073071 | 0    | N.A. |
| LRFN1         |  | 0            | N.A. | 0    |
| LRFN2         |  | -0,338527874 | 0    | N.A. |
| LRFN5         |  | 0            | N.A. | 0    |
| LRGUK         |  | 0,26594567   | 0    | N.A. |
| LRP1B         |  | 0            | N.A. | 0    |
| LRP2          |  | 0            | N.A. | 0    |
| LRRC15        |  | 0            | N.A. | 0    |
| LRRC18        |  | 0            | N.A. | 0    |
| LRRC2-AS1     |  | 0            | N.A. | 0    |
| LRRC38        |  | 0            | N.A. | 0    |
| LRRC3B        |  | 0            | N.A. | 0    |
| LRRC4B        |  | 0            | N.A. | 0    |
| LRRC4C        |  | -0,056663581 | 0    | N.A. |

|             |  |              |   |      |   |
|-------------|--|--------------|---|------|---|
| LRRC52      |  |              | 0 | N.A. | 0 |
| LRRC55      |  |              | 0 | N.A. | 0 |
| LRRC63      |  |              | 0 | N.A. | 0 |
| LRRC71      |  |              | 0 | N.A. | 0 |
| LRRC9       |  | 0,237980208  | 0 | N.A. | 0 |
| LRRD1       |  | 0,236848587  | 0 | N.A. | 0 |
| LRRK2       |  |              | 0 | N.A. | 0 |
| LRRN4       |  | -0,240700833 | 0 | N.A. | 0 |
| LRRN4CL     |  | -0,017730457 | 0 | N.A. | 0 |
| LRRTM2      |  | -0,215514438 | 0 | N.A. | 0 |
| LRRTM4      |  |              | 0 | N.A. | 0 |
| LRTM2       |  |              | 0 | N.A. | 0 |
| LTA         |  |              | 0 | N.A. | 0 |
| LUC7L2      |  | -0,070650632 | 0 | N.A. | 0 |
| LUZP2       |  |              | 0 | N.A. | 0 |
| LY6G6F      |  |              | 0 | N.A. | 0 |
| LY86-AS1    |  | -0,218431062 | 0 | N.A. | 0 |
| LYPD2       |  |              | 0 | N.A. | 0 |
| LYPLAL1-AS1 |  | 0,035909195  | 0 | N.A. | 0 |
| LYVE1       |  | 0,06900012   | 0 | N.A. | 0 |
| LYZL2       |  |              | 0 | N.A. | 0 |
| LYZL4       |  | 0,172954168  | 0 | N.A. | 0 |
| MAB21L1     |  |              | 0 | N.A. | 0 |
| MAB21L2     |  |              | 0 | N.A. | 0 |
| MACC1-AS1   |  |              | 0 | N.A. | 0 |
| MAFA-AS1    |  | 0,091477809  | 0 | N.A. | 0 |
| MAG         |  | -0,080170565 | 0 | N.A. | 0 |
| MAGEA10     |  |              | 0 | N.A. | 0 |
| MAGEB10     |  |              | 0 | N.A. | 0 |
| MAGED4      |  |              | 0 | N.A. | 0 |
| MAGEE2      |  |              | 0 | N.A. | 0 |
| MAGEL2      |  | -0,133570526 | 0 | N.A. | 0 |
| MAGI1-AS1   |  | 0,228744416  | 0 | N.A. | 0 |



|             |  |              |   |      |   |
|-------------|--|--------------|---|------|---|
| MAL         |  |              | 0 | N.A. | 0 |
| MAMDC2      |  | -0,018957241 | 0 | N.A. | 0 |
| MAP1LC3C    |  |              | 0 | N.A. | 0 |
| MAP3K14-AS1 |  | -0,013510018 | 0 | N.A. | 0 |
| MAP3K15     |  |              | 0 | N.A. | 0 |
| MAPK10      |  | 0,126265388  | 0 | N.A. | 0 |
| MARCH10     |  |              | 0 | N.A. | 0 |
| MARCH4      |  |              | 0 | N.A. | 0 |
| MASP1       |  | 0,117760074  | 0 | N.A. | 0 |
| MASP2       |  | 0,150728695  | 0 | N.A. | 0 |
| MBD3L1      |  |              | 0 | N.A. | 0 |
| MBL2        |  |              | 0 | N.A. | 0 |
| MBOAT4      |  |              | 0 | N.A. | 0 |
| MC4R        |  |              | 0 | N.A. | 0 |
| MCEMP1      |  | 0,065498977  | 0 | N.A. | 0 |
| MCF2        |  |              | 0 | N.A. | 0 |
| MCHR1       |  |              | 0 | N.A. | 0 |
| MCHR2       |  |              | 0 | N.A. | 0 |
| MCIDAS      |  | 0,032213848  | 0 | N.A. | 0 |
| MCM8-AS1    |  |              | 0 | N.A. | 0 |
| MDC1-AS1    |  |              | 0 | N.A. | 0 |
| MDGA2       |  |              | 0 | N.A. | 0 |
| MED12L      |  |              | 0 | N.A. | 0 |
| MED4-AS1    |  | -0,388190246 | 0 | N.A. | 0 |
| MEF2B       |  |              | 0 | N.A. | 0 |
| MEF2C-AS1   |  | -0,034769699 | 0 | N.A. | 0 |
| MEG8        |  |              | 0 | N.A. | 0 |
| MEG9        |  |              | 0 | N.A. | 0 |
| MEGF10      |  |              | 0 | N.A. | 0 |
| MEIKIN      |  | 0,132496596  | 0 | N.A. | 0 |
| MEIS1-AS2   |  | 0,150941019  | 0 | N.A. | 0 |
| MEOX1       |  |              | 0 | N.A. | 0 |
| MEOX2       |  | 0,058015713  | 0 | N.A. | 0 |

|            |  |              |   |      |   |
|------------|--|--------------|---|------|---|
| MEPE       |  |              | 0 | N.A. | 0 |
| MESP2      |  | 0,05643183   | 0 | N.A. | 0 |
| METTLL11B  |  |              | 0 | N.A. | 0 |
| METTLL24   |  |              | 0 | N.A. | 0 |
| MGAM       |  | 0,093180811  | 0 | N.A. | 0 |
| MGAT5B     |  | 0,002652887  | 0 | N.A. | 0 |
| MICU3      |  | 0,09354134   | 0 | N.A. | 0 |
| MIR100HG   |  | -0,056663581 | 0 | N.A. | 0 |
| MIR133A1HG |  |              | 0 | N.A. | 0 |
| MIR1539    |  |              | 0 | N.A. | 0 |
| MIR202HG   |  |              | 0 | N.A. | 0 |
| MIR3179-1  |  |              | 0 | N.A. | 0 |
| MIR3180-1  |  |              | 0 | N.A. | 0 |
| MIR3180-4  |  | 0,075183656  | 0 | N.A. | 0 |
| MIR325HG   |  |              | 0 | N.A. | 0 |
| MIR99AHG   |  |              | 0 | N.A. | 0 |
| MKNK1-AS1  |  |              | 0 | N.A. | 0 |
| MKRN3      |  | -0,017334247 | 0 | N.A. | 0 |
| MKX-AS1    |  |              | 0 | N.A. | 0 |
| MLIP       |  | -0,046146087 | 0 | N.A. | 0 |
| MLNR       |  |              | 0 | N.A. | 0 |
| MMP16      |  |              | 0 | N.A. | 0 |
| MMP20      |  | -0,187980581 | 0 | N.A. | 0 |
| MMP21      |  |              | 0 | N.A. | 0 |
| MMP27      |  |              | 0 | N.A. | 0 |
| MMP8       |  |              | 0 | N.A. | 0 |
| MOBP       |  |              | 0 | N.A. | 0 |
| MORC1      |  |              | 0 | N.A. | 0 |
| MOV10L1    |  | -0,035638133 | 0 | N.A. | 0 |
| MPL        |  | -0,042036555 | 0 | N.A. | 0 |
| MPP4       |  | 0,269992716  | 0 | N.A. | 0 |
| MPPED1     |  |              | 0 | N.A. | 0 |
| MRAP       |  |              | 0 | N.A. | 0 |

|             |  |              |   |      |   |
|-------------|--|--------------|---|------|---|
| MRGPRF      |  | -0,106566266 | 0 | N.A. | 0 |
| MRGPRF-AS1  |  |              | 0 | N.A. | 0 |
| MRGPRX2     |  |              | 0 | N.A. | 0 |
| MRGPRX3     |  |              | 0 | N.A. | 0 |
| MRO         |  | 0,243460549  | 0 | N.A. | 0 |
| MROH9       |  |              | 0 | N.A. | 0 |
| MS4A14      |  |              | 0 | N.A. | 0 |
| MS4A15      |  | 0,06881033   | 0 | N.A. | 0 |
| MS4A3       |  |              | 0 | N.A. | 0 |
| MS4A4E      |  |              | 0 | N.A. | 0 |
| MS4A5       |  |              | 0 | N.A. | 0 |
| MS4A6E      |  |              | 0 | N.A. | 0 |
| MSH5-SAPCD1 |  |              | 0 | N.A. | 0 |
| MSTRB3      |  | -0,02340041  | 0 | N.A. | 0 |
| MT1B        |  | 0,119661661  | 0 | N.A. | 0 |
| MT4         |  | -0,049692811 | 0 | N.A. | 0 |
| MTMR7       |  | -0,082307229 | 0 | N.A. | 0 |
| MTNR1A      |  |              | 0 | N.A. | 0 |
| MUM1L1      |  |              | 0 | N.A. | 0 |
| MUSK        |  |              | 0 | N.A. | 0 |
| MYBPC2      |  |              | 0 | N.A. | 0 |
| MYBPH       |  |              | 0 | N.A. | 0 |
| MYBPHL      |  | 0,246723535  | 0 | N.A. | 0 |
| MYCT1       |  | -0,19774898  | 0 | N.A. | 0 |
| MYF6        |  |              | 0 | N.A. | 0 |
| MYH6        |  |              | 0 | N.A. | 0 |
| MYH7        |  |              | 0 | N.A. | 0 |
| MYHAS       |  |              | 0 | N.A. | 0 |
| MYL10       |  |              | 0 | N.A. | 0 |
| MYL2        |  |              | 0 | N.A. | 0 |
| MYL3        |  | 0,037114613  | 0 | N.A. | 0 |
| MYL4        |  | -0,141801331 | 0 | N.A. | 0 |
| MYL7        |  |              | 0 | N.A. | 0 |

|              |  |              |   |      |   |
|--------------|--|--------------|---|------|---|
| MYLK-AS2     |  |              | 0 | N.A. | 0 |
| MYLK2        |  |              | 0 | N.A. | 0 |
| MYO16        |  | -0,109266923 | 0 | N.A. | 0 |
| MYO16-AS1    |  | 0,124035059  | 0 | N.A. | 0 |
| MYO1H        |  |              | 0 | N.A. | 0 |
| MYO3A        |  |              | 0 | N.A. | 0 |
| MYOC         |  |              | 0 | N.A. | 0 |
| MYOCD        |  |              | 0 | N.A. | 0 |
| MYOZ1        |  |              | 0 | N.A. | 0 |
| MYOZ2        |  |              | 0 | N.A. | 0 |
| MYOZ3        |  |              | 0 | N.A. | 0 |
| NAALAD2      |  |              | 0 | N.A. | 0 |
| NAALADL2-AS2 |  |              | 0 | N.A. | 0 |
| NADK2-AS1    |  |              | 0 | N.A. | 0 |
| NALCN        |  |              | 0 | N.A. | 0 |
| NALCN-AS1    |  |              | 0 | N.A. | 0 |
| NAMA         |  | 0,249183174  | 0 | N.A. | 0 |
| NANOGNB      |  |              | 0 | N.A. | 0 |
| NAP1L2       |  |              | 0 | N.A. | 0 |
| NAP1L3       |  |              | 0 | N.A. | 0 |
| NAP1L6       |  |              | 0 | N.A. | 0 |
| NAT8L        |  | 0,077626177  | 0 | N.A. | 0 |
| NAV2-AS2     |  |              | 0 | N.A. | 0 |
| NAV3         |  | -0,03392888  | 0 | N.A. | 0 |
| NBAT1        |  |              | 0 | N.A. | 0 |
| NBPF4        |  |              | 0 | N.A. | 0 |
| NCAM2        |  |              | 0 | N.A. | 0 |
| NCAN         |  |              | 0 | N.A. | 0 |
| NCBP2-AS1    |  |              | 0 | N.A. | 0 |
| NCBP2L       |  |              | 0 | N.A. | 0 |
| NCR1         |  |              | 0 | N.A. | 0 |
| NCR2         |  |              | 0 | N.A. | 0 |
| NCRNA00250   |  | 0,162514099  | 0 | N.A. | 0 |

|               |  |              |   |      |   |
|---------------|--|--------------|---|------|---|
| NDST3         |  | -0,089246263 | 0 | N.A. | 0 |
| NDUFC2-KCTD14 |  |              | 0 | N.A. | 0 |
| NECAB1        |  |              | 0 | N.A. | 0 |
| NECAB2        |  |              | 0 | N.A. | 0 |
| NEDD8-MDP1    |  | 0,035909195  | 0 | N.A. | 0 |
| NEFH          |  | -0,234497338 | 0 | N.A. | 0 |
| NEFM          |  |              | 0 | N.A. | 0 |
| NELL1         |  |              | 0 | N.A. | 0 |
| NETO1         |  |              | 0 | N.A. | 0 |
| NEXN-AS1      |  |              | 0 | N.A. | 0 |
| NFE4          |  |              | 0 | N.A. | 0 |
| NFIA-AS2      |  |              | 0 | N.A. | 0 |
| NGF           |  |              | 0 | N.A. | 0 |
| NHS-AS1       |  |              | 0 | N.A. | 0 |
| NIM1K         |  | -0,056663581 | 0 | N.A. | 0 |
| NKAIN2        |  | -0,038637595 | 0 | N.A. | 0 |
| NKAIN4        |  |              | 0 | N.A. | 0 |
| NKAPL         |  |              | 0 | N.A. | 0 |
| NKX2-1        |  |              | 0 | N.A. | 0 |
| NKX2-1-AS1    |  |              | 0 | N.A. | 0 |
| NKX2-3        |  |              | 0 | N.A. | 0 |
| NKX3-2        |  |              | 0 | N.A. | 0 |
| NKX6-2        |  |              | 0 | N.A. | 0 |
| NKX6-3        |  |              | 0 | N.A. | 0 |
| NLGN4X        |  |              | 0 | N.A. | 0 |
| NLGN4Y        |  | -0,087091051 | 0 | N.A. | 0 |
| NLRC4         |  |              | 0 | N.A. | 0 |
| NLRP12        |  | -0,025417325 | 0 | N.A. | 0 |
| NLRP14        |  |              | 0 | N.A. | 0 |
| NLRP4         |  |              | 0 | N.A. | 0 |
| NLRP7         |  |              | 0 | N.A. | 0 |
| NLRP8         |  |              | 0 | N.A. | 0 |
| NMBR          |  |              | 0 | N.A. | 0 |

|           |  |              |   |      |   |
|-----------|--|--------------|---|------|---|
| NME2      |  | -0,030121414 | 0 | N.A. | 0 |
| NME8      |  |              | 0 | N.A. | 0 |
| NME9      |  | 0,129800483  | 0 | N.A. | 0 |
| NMRK2     |  |              | 0 | N.A. | 0 |
| NMS       |  |              | 0 | N.A. | 0 |
| NNAT      |  | 0,067065763  | 0 | N.A. | 0 |
| NOG       |  |              | 0 | N.A. | 0 |
| NOS1      |  |              | 0 | N.A. | 0 |
| NOX3      |  |              | 0 | N.A. | 0 |
| NOX5      |  |              | 0 | N.A. | 0 |
| NPAS4     |  |              | 0 | N.A. | 0 |
| NPFFR2    |  |              | 0 | N.A. | 0 |
| NPHP3-AS1 |  | -0,338316193 | 0 | N.A. | 0 |
| NPIPA7    |  |              | 0 | N.A. | 0 |
| NPIPA8    |  |              | 0 | N.A. | 0 |
| NPIP3     |  | 0,330183392  | 0 | N.A. | 0 |
| NPIP7     |  |              | 0 | N.A. | 0 |
| NPIP8     |  | 0,001544495  | 0 | N.A. | 0 |
| NPIP9     |  |              | 0 | N.A. | 0 |
| NPPA      |  | 0,072729628  | 0 | N.A. | 0 |
| NPR1      |  |              | 0 | N.A. | 0 |
| NPY       |  |              | 0 | N.A. | 0 |
| NPY4R     |  |              | 0 | N.A. | 0 |
| NPY5R     |  |              | 0 | N.A. | 0 |
| NR0B1     |  | -0,025234084 | 0 | N.A. | 0 |
| NR2E1     |  |              | 0 | N.A. | 0 |
| NR5A1     |  |              | 0 | N.A. | 0 |
| NRG1      |  | 0,055374917  | 0 | N.A. | 0 |
| NRG3      |  |              | 0 | N.A. | 0 |
| NRIP2     |  | 0,083283446  | 0 | N.A. | 0 |
| NRK       |  |              | 0 | N.A. | 0 |
| NRN1L     |  |              | 0 | N.A. | 0 |
| NRSN1     |  |              | 0 | N.A. | 0 |

|            |  |              |   |      |   |
|------------|--|--------------|---|------|---|
| NTF4       |  |              | 0 | N.A. | 0 |
| NTM        |  | 0,056882882  | 0 | N.A. | 0 |
| NTNG1      |  |              | 0 | N.A. | 0 |
| NTRK1      |  |              | 0 | N.A. | 0 |
| NTRK3      |  |              | 0 | N.A. | 0 |
| NUCB1-AS1  |  |              | 0 | N.A. | 0 |
| NUDT10     |  | -0,013567514 | 0 | N.A. | 0 |
| NUGGC      |  |              | 0 | N.A. | 0 |
| NUP210L    |  |              | 0 | N.A. | 0 |
| NUTM2A     |  | -0,072506321 | 0 | N.A. | 0 |
| NUTM2B     |  |              | 0 | N.A. | 0 |
| NUTM2D     |  |              | 0 | N.A. | 0 |
| NUTM2E     |  | 0,008710349  | 0 | N.A. | 0 |
| NUTM2G     |  |              | 0 | N.A. | 0 |
| NXNL2      |  |              | 0 | N.A. | 0 |
| NXPH1      |  | 0,153433482  | 0 | N.A. | 0 |
| OCIAD1-AS1 |  |              | 0 | N.A. | 0 |
| OCM        |  | -0,03596857  | 0 | N.A. | 0 |
| OCSTAMP    |  |              | 0 | N.A. | 0 |
| ODF1       |  |              | 0 | N.A. | 0 |
| OFCC1      |  | -0,153389838 | 0 | N.A. | 0 |
| OGFRP1     |  | -0,375276435 | 0 | N.A. | 0 |
| OLIG1      |  |              | 0 | N.A. | 0 |
| OLIG2      |  |              | 0 | N.A. | 0 |
| OMD        |  | -0,221404202 | 0 | N.A. | 0 |
| OMG        |  |              | 0 | N.A. | 0 |
| OPA1-AS1   |  |              | 0 | N.A. | 0 |
| OPCML      |  |              | 0 | N.A. | 0 |
| OPN1SW     |  |              | 0 | N.A. | 0 |
| OPN4       |  |              | 0 | N.A. | 0 |
| OPN5       |  |              | 0 | N.A. | 0 |
| OPRM1      |  |              | 0 | N.A. | 0 |
| OR10A4     |  | 0,266713809  | 0 | N.A. | 0 |

|           |  |              |   |      |   |
|-----------|--|--------------|---|------|---|
| OR10A5    |  |              | 0 | N.A. | 0 |
| OR10P1    |  |              | 0 | N.A. | 0 |
| OR13A1    |  |              | 0 | N.A. | 0 |
| OR13C5    |  |              | 0 | N.A. | 0 |
| OR1J1     |  |              | 0 | N.A. | 0 |
| OR2A7     |  |              | 0 | N.A. | 0 |
| OR2C3     |  |              | 0 | N.A. | 0 |
| OR2D2     |  |              | 0 | N.A. | 0 |
| OR2L13    |  |              | 0 | N.A. | 0 |
| OR4C6     |  |              | 0 | N.A. | 0 |
| OR51E2    |  |              | 0 | N.A. | 0 |
| OR52K2    |  |              | 0 | N.A. | 0 |
| OR52N4    |  |              | 0 | N.A. | 0 |
| OR5M11    |  |              | 0 | N.A. | 0 |
| OR7A5     |  |              | 0 | N.A. | 0 |
| OR7D2     |  |              | 0 | N.A. | 0 |
| OR8D4     |  |              | 0 | N.A. | 0 |
| OR8G1     |  |              | 0 | N.A. | 0 |
| OR8S1     |  |              | 0 | N.A. | 0 |
| OSTN      |  |              | 0 | N.A. | 0 |
| OSTN-AS1  |  |              | 0 | N.A. | 0 |
| OTOF      |  |              | 0 | N.A. | 0 |
| OTOG      |  |              | 0 | N.A. | 0 |
| OTOP2     |  |              | 0 | N.A. | 0 |
| OTOR      |  |              | 0 | N.A. | 0 |
| OTOS      |  |              | 0 | N.A. | 0 |
| OVCA2     |  | -0,208540971 | 0 | N.A. | 0 |
| OVCH1     |  | 0,019552565  | 0 | N.A. | 0 |
| OVCH1-AS1 |  |              | 0 | N.A. | 0 |
| P2RX1     |  |              | 0 | N.A. | 0 |
| P2RX2     |  |              | 0 | N.A. | 0 |
| P2RX3     |  |              | 0 | N.A. | 0 |
| P2RY12    |  |              | 0 | N.A. | 0 |



|             |  |              |   |      |   |
|-------------|--|--------------|---|------|---|
| P2RY13      |  | 0,21061856   | 0 | N.A. | 0 |
| P2RY14      |  | -0,080170565 | 0 | N.A. | 0 |
| P2RY6       |  | -0,244866579 | 0 | N.A. | 0 |
| P3H2-AS1    |  |              | 0 | N.A. | 0 |
| P4HA2-AS1   |  |              | 0 | N.A. | 0 |
| PABPC4L     |  |              | 0 | N.A. | 0 |
| PABPN1L     |  |              | 0 | N.A. | 0 |
| PACERR      |  |              | 0 | N.A. | 0 |
| PACSIN1     |  |              | 0 | N.A. | 0 |
| PADI4       |  | -0,049490728 | 0 | N.A. | 0 |
| PADI6       |  |              | 0 | N.A. | 0 |
| PAGE2       |  |              | 0 | N.A. | 0 |
| PAGE2B      |  |              | 0 | N.A. | 0 |
| PAGE3       |  |              | 0 | N.A. | 0 |
| PAK7        |  | -0,067340679 | 0 | N.A. | 0 |
| PALM2-AKAP2 |  |              | 0 | N.A. | 0 |
| PAMR1       |  | 0,112524993  | 0 | N.A. | 0 |
| PANDAR      |  |              | 0 | N.A. | 0 |
| PAPL        |  | 0,092101135  | 0 | N.A. | 0 |
| PAPOLB      |  | 0,074764166  | 0 | N.A. | 0 |
| PAPPA-AS1   |  |              | 0 | N.A. | 0 |
| PAPPA-AS2   |  | -0,04779246  | 0 | N.A. | 0 |
| PAPPA2      |  |              | 0 | N.A. | 0 |
| PAQR9-AS1   |  |              | 0 | N.A. | 0 |
| PATE1       |  | 0,34389655   | 0 | N.A. | 0 |
| PAX1        |  |              | 0 | N.A. | 0 |
| PAX3        |  |              | 0 | N.A. | 0 |
| PBOV1       |  | 0,011689245  | 0 | N.A. | 0 |
| PCA3        |  |              | 0 | N.A. | 0 |
| PCAT14      |  |              | 0 | N.A. | 0 |
| PCAT18      |  | 0,119613478  | 0 | N.A. | 0 |
| PCDH12      |  | 0,049988878  | 0 | N.A. | 0 |
| PCDH18      |  |              | 0 | N.A. | 0 |

|            |  |              |   |      |   |
|------------|--|--------------|---|------|---|
| PCDH20     |  |              | 0 | N.A. | 0 |
| PCDHA1     |  |              | 0 | N.A. | 0 |
| PCDHA11    |  |              | 0 | N.A. | 0 |
| PCDHA12    |  |              | 0 | N.A. | 0 |
| PCDHA13    |  |              | 0 | N.A. | 0 |
| PCDHA2     |  |              | 0 | N.A. | 0 |
| PCDHA3     |  |              | 0 | N.A. | 0 |
| PCDHA6     |  |              | 0 | N.A. | 0 |
| PCDHA7     |  |              | 0 | N.A. | 0 |
| PCDHA9     |  | 0,012735721  | 0 | N.A. | 0 |
| PCDHAC1    |  |              | 0 | N.A. | 0 |
| PCDHAC2    |  | -0,103762047 | 0 | N.A. | 0 |
| PCDHB1     |  |              | 0 | N.A. | 0 |
| PCDHB3     |  | -0,087091051 | 0 | N.A. | 0 |
| PCDHB4     |  | 0,026570911  | 0 | N.A. | 0 |
| PCDHB5     |  |              | 0 | N.A. | 0 |
| PCDHB6     |  |              | 0 | N.A. | 0 |
| PCDHB8     |  |              | 0 | N.A. | 0 |
| PCDHGA12   |  | 0,111203572  | 0 | N.A. | 0 |
| PCDHGA2    |  | -0,023750482 | 0 | N.A. | 0 |
| PCDHGA4    |  | 0,391339458  | 0 | N.A. | 0 |
| PCDHGA9    |  | 0,059888376  | 0 | N.A. | 0 |
| PCDHGB1    |  | -0,020876396 | 0 | N.A. | 0 |
| PCDHGB2    |  | -0,127001163 | 0 | N.A. | 0 |
| PCDHGB3    |  | 0,21817745   | 0 | N.A. | 0 |
| PCDHGB7    |  |              | 0 | N.A. | 0 |
| PCDHGC4    |  |              | 0 | N.A. | 0 |
| PCDHGC5    |  |              | 0 | N.A. | 0 |
| PCOLCE-AS1 |  | -0,051365804 | 0 | N.A. | 0 |
| PCSK2      |  | 0,322029999  | 0 | N.A. | 0 |
| PCSK6-AS1  |  |              | 0 | N.A. | 0 |
| PDC        |  | 0,255234424  | 0 | N.A. | 0 |
| PDCD1LG2   |  |              | 0 | N.A. | 0 |

|            |  |              |   |      |   |
|------------|--|--------------|---|------|---|
| PDE1C      |  |              | 0 | N.A. | 0 |
| PDE2A      |  |              | 0 | N.A. | 0 |
| PDE6H      |  |              | 0 | N.A. | 0 |
| PDE7B      |  | 0,069225607  | 0 | N.A. | 0 |
| PDX1-AS1   |  | -0,033632365 | 0 | N.A. | 0 |
| PDZD4      |  |              | 0 | N.A. | 0 |
| PDZD9      |  |              | 0 | N.A. | 0 |
| PDZRN3-AS1 |  | 0,128899395  | 0 | N.A. | 0 |
| PDZRN4     |  |              | 0 | N.A. | 0 |
| PEG3       |  |              | 0 | N.A. | 0 |
| PENK       |  |              | 0 | N.A. | 0 |
| PEX5L-AS1  |  |              | 0 | N.A. | 0 |
| PF4V1      |  |              | 0 | N.A. | 0 |
| PFKFB1     |  |              | 0 | N.A. | 0 |
| PFN3       |  |              | 0 | N.A. | 0 |
| PGA3       |  |              | 0 | N.A. | 0 |
| PGA5       |  |              | 0 | N.A. | 0 |
| PGLYRP1    |  | 0,03116295   | 0 | N.A. | 0 |
| PGLYRP2    |  |              | 0 | N.A. | 0 |
| PGLYRP4    |  | -0,087163387 | 0 | N.A. | 0 |
| PGM5-AS1   |  |              | 0 | N.A. | 0 |
| PGM5P3-AS1 |  |              | 0 | N.A. | 0 |
| PGM5P4-AS1 |  |              | 0 | N.A. | 0 |
| PGPEP1L    |  |              | 0 | N.A. | 0 |
| PGR        |  |              | 0 | N.A. | 0 |
| PHF21B     |  |              | 0 | N.A. | 0 |
| PHKA2-AS1  |  |              | 0 | N.A. | 0 |
| PHOSPHO1   |  |              | 0 | N.A. | 0 |
| PIANP      |  |              | 0 | N.A. | 0 |
| PIEZO2     |  | -0,033730152 | 0 | N.A. | 0 |
| PIH1D3     |  |              | 0 | N.A. | 0 |
| PIK3C2G    |  | 0,154952171  | 0 | N.A. | 0 |
| PIK3CD-AS1 |  |              | 0 | N.A. | 0 |

|             |  |              |   |      |   |
|-------------|--|--------------|---|------|---|
| PIK3R5      |  | -0,370437798 | 0 | N.A. | 0 |
| PISRT1      |  | 0,001075161  | 0 | N.A. | 0 |
| PITRM1-AS1  |  | 0,555664003  | 0 | N.A. | 0 |
| PITX3       |  |              | 0 | N.A. | 0 |
| PKD1L2      |  | -0,14073666  | 0 | N.A. | 0 |
| PKD1L3      |  |              | 0 | N.A. | 0 |
| PKD2L1      |  |              | 0 | N.A. | 0 |
| PKDREJ      |  |              | 0 | N.A. | 0 |
| PKHD1       |  | 0,035909195  | 0 | N.A. | 0 |
| PKHD1L1     |  |              | 0 | N.A. | 0 |
| PKNOX2      |  |              | 0 | N.A. | 0 |
| PLA2G4B     |  |              | 0 | N.A. | 0 |
| PLA2G4E     |  | 0,087042122  | 0 | N.A. | 0 |
| PLA2G4E-AS1 |  |              | 0 | N.A. | 0 |
| PLA2G5      |  |              | 0 | N.A. | 0 |
| PLAC1       |  | -0,131997209 | 0 | N.A. | 0 |
| PLCD4       |  | 0,17446872   | 0 | N.A. | 0 |
| PLCE1-AS1   |  |              | 0 | N.A. | 0 |
| PLCL2-AS1   |  |              | 0 | N.A. | 0 |
| PLEKHG4B    |  |              | 0 | N.A. | 0 |
| PLG         |  | -0,2168217   | 0 | N.A. | 0 |
| PLK5        |  |              | 0 | N.A. | 0 |
| PLXNA4      |  |              | 0 | N.A. | 0 |
| PM20D1      |  |              | 0 | N.A. | 0 |
| PMP2        |  |              | 0 | N.A. | 0 |
| PNLIPRP1    |  |              | 0 | N.A. | 0 |
| PNLIPRP3    |  |              | 0 | N.A. | 0 |
| PNMA3       |  |              | 0 | N.A. | 0 |
| PNMA5       |  |              | 0 | N.A. | 0 |
| PNMAL1      |  |              | 0 | N.A. | 0 |
| PNMAL2      |  | 0,312425052  | 0 | N.A. | 0 |
| PODN        |  | 0,054826697  | 0 | N.A. | 0 |
| POMK        |  | 0,131702667  | 0 | N.A. | 0 |

|              |  |              |   |      |   |
|--------------|--|--------------|---|------|---|
| POTEF        |  | 0,242678817  | 0 | N.A. | 0 |
| POTEI        |  | 0,09102857   | 0 | N.A. | 0 |
| POTEJ        |  | 0,275189364  | 0 | N.A. | 0 |
| POTEM        |  | 0,126983831  | 0 | N.A. | 0 |
| POU3F2       |  |              | 0 | N.A. | 0 |
| POU3F3       |  | -0,044032151 | 0 | N.A. | 0 |
| POU6F2-AS2   |  | 0,025571874  | 0 | N.A. | 0 |
| PP12613      |  |              | 0 | N.A. | 0 |
| PP2D1        |  | -0,033964715 | 0 | N.A. | 0 |
| PPAN-P2RY11  |  |              | 0 | N.A. | 0 |
| PPAPDC3      |  |              | 0 | N.A. | 0 |
| PPEF1        |  |              | 0 | N.A. | 0 |
| PPEF2        |  |              | 0 | N.A. | 0 |
| PPFIA2       |  |              | 0 | N.A. | 0 |
| PPIAL4B      |  |              | 0 | N.A. | 0 |
| PPIAL4C      |  | 0,078294522  | 0 | N.A. | 0 |
| PPIAL4E      |  |              | 0 | N.A. | 0 |
| PPM1E        |  |              | 0 | N.A. | 0 |
| PPP1R17      |  |              | 0 | N.A. | 0 |
| PPP1R3C      |  |              | 0 | N.A. | 0 |
| PPP2R2B      |  |              | 0 | N.A. | 0 |
| PPY          |  |              | 0 | N.A. | 0 |
| PRAM1        |  |              | 0 | N.A. | 0 |
| PRB2         |  | -0,01125164  | 0 | N.A. | 0 |
| PRB3         |  | 0,005267169  | 0 | N.A. | 0 |
| PRC1-AS1     |  | -0,025280353 | 0 | N.A. | 0 |
| PRCD         |  |              | 0 | N.A. | 0 |
| PRDM14       |  |              | 0 | N.A. | 0 |
| PREX2        |  |              | 0 | N.A. | 0 |
| PRG2         |  | -0,14073666  | 0 | N.A. | 0 |
| PRG4         |  |              | 0 | N.A. | 0 |
| PRH1-PRR4    |  |              | 0 | N.A. | 0 |
| PRICKLE2-AS3 |  |              | 0 | N.A. | 0 |

|             |  |              |   |      |   |
|-------------|--|--------------|---|------|---|
| PRIMA1      |  |              | 0 | N.A. | 0 |
| PRKCA-AS1   |  | 0,13744339   | 0 | N.A. | 0 |
| PRKG1-AS1   |  |              | 0 | N.A. | 0 |
| PRL         |  |              | 0 | N.A. | 0 |
| PRLHR       |  |              | 0 | N.A. | 0 |
| PRND        |  |              | 0 | N.A. | 0 |
| PROK1       |  |              | 0 | N.A. | 0 |
| PROK2       |  | -0,22700888  | 0 | N.A. | 0 |
| PROKR1      |  |              | 0 | N.A. | 0 |
| PROSER2-AS1 |  |              | 0 | N.A. | 0 |
| PROX2       |  |              | 0 | N.A. | 0 |
| PRPH2       |  |              | 0 | N.A. | 0 |
| PRR23C      |  |              | 0 | N.A. | 0 |
| PRR29       |  |              | 0 | N.A. | 0 |
| PRR35       |  | 0,192749775  | 0 | N.A. | 0 |
| PRRG3       |  | -0,087746453 | 0 | N.A. | 0 |
| PRSS38      |  |              | 0 | N.A. | 0 |
| PRSS42      |  | 0,196547295  | 0 | N.A. | 0 |
| PRSS48      |  |              | 0 | N.A. | 0 |
| PRSS50      |  |              | 0 | N.A. | 0 |
| PRSS51      |  | 0,069225508  | 0 | N.A. | 0 |
| PRSS55      |  |              | 0 | N.A. | 0 |
| PRTG        |  |              | 0 | N.A. | 0 |
| PSD2        |  | 0,243777137  | 0 | N.A. | 0 |
| PSG1        |  |              | 0 | N.A. | 0 |
| PSG3        |  |              | 0 | N.A. | 0 |
| PSG4        |  |              | 0 | N.A. | 0 |
| PSG8        |  |              | 0 | N.A. | 0 |
| PSMA8       |  |              | 0 | N.A. | 0 |
| PTCHD1-AS   |  |              | 0 | N.A. | 0 |
| PTCRA       |  |              | 0 | N.A. | 0 |
| PTCSC3      |  |              | 0 | N.A. | 0 |
| PTENP1-AS   |  |              | 0 | N.A. | 0 |

|                |  |              |   |      |   |
|----------------|--|--------------|---|------|---|
| PTF1A          |  | -0,024375969 | 0 | N.A. | 0 |
| PTGER3         |  | 0,073126338  | 0 | N.A. | 0 |
| PTGES3L-AARSD1 |  |              | 0 | N.A. | 0 |
| PTGFR          |  |              | 0 | N.A. | 0 |
| PTH1R          |  |              | 0 | N.A. | 0 |
| PTH2R          |  | -0,053698773 | 0 | N.A. | 0 |
| PTOV1-AS2      |  |              | 0 | N.A. | 0 |
| PTPN5          |  |              | 0 | N.A. | 0 |
| PTPRCAP        |  | -0,225163244 | 0 | N.A. | 0 |
| PTPRQ          |  |              | 0 | N.A. | 0 |
| PTPRZ1         |  |              | 0 | N.A. | 0 |
| PURG           |  |              | 0 | N.A. | 0 |
| PVALB          |  |              | 0 | N.A. | 0 |
| PVRIG          |  |              | 0 | N.A. | 0 |
| PWRN1          |  |              | 0 | N.A. | 0 |
| PXT1           |  |              | 0 | N.A. | 0 |
| PYDC1          |  |              | 0 | N.A. | 0 |
| PYDC2          |  | -0,083023222 | 0 | N.A. | 0 |
| PYGO1          |  |              | 0 | N.A. | 0 |
| PYY            |  |              | 0 | N.A. | 0 |
| PZP            |  |              | 0 | N.A. | 0 |
| QRFP           |  |              | 0 | N.A. | 0 |
| QRFPR          |  | 0,029803283  | 0 | N.A. | 0 |
| R3HDML         |  | 0,059290145  | 0 | N.A. | 0 |
| RAB19          |  | -0,382749673 | 0 | N.A. | 0 |
| RAB40A         |  | -0,090753943 | 0 | N.A. | 0 |
| RAB4B-EGLN2    |  |              | 0 | N.A. | 0 |
| RANBP3L        |  |              | 0 | N.A. | 0 |
| RAPGEF4-AS1    |  |              | 0 | N.A. | 0 |
| RASGEF1C       |  |              | 0 | N.A. | 0 |
| RASGRF2-AS1    |  | -0,068586    | 0 | N.A. | 0 |
| RASGRP4        |  |              | 0 | N.A. | 0 |
| RAX            |  |              | 0 | N.A. | 0 |

|           |  |              |   |      |   |
|-----------|--|--------------|---|------|---|
| RBAKDN    |  | -0,034147717 | 0 | N.A. | 0 |
| RBFOX3    |  | -0,000164059 | 0 | N.A. | 0 |
| RBM20     |  |              | 0 | N.A. | 0 |
| RBM46     |  |              | 0 | N.A. | 0 |
| RBM5-AS1  |  |              | 0 | N.A. | 0 |
| RBMS3-AS2 |  |              | 0 | N.A. | 0 |
| RBMS3-AS3 |  | -0,220132295 | 0 | N.A. | 0 |
| RBMXL2    |  |              | 0 | N.A. | 0 |
| RBP3      |  | 0,211220851  | 0 | N.A. | 0 |
| RBP5      |  | 0,083283446  | 0 | N.A. | 0 |
| RBPMS2    |  |              | 0 | N.A. | 0 |
| RCSD1     |  | -0,181822692 | 0 | N.A. | 0 |
| RCVRN     |  |              | 0 | N.A. | 0 |
| RDH8      |  |              | 0 | N.A. | 0 |
| REC114    |  |              | 0 | N.A. | 0 |
| RELN      |  |              | 0 | N.A. | 0 |
| RERGL     |  | 0,161501152  | 0 | N.A. | 0 |
| RFPL1S    |  |              | 0 | N.A. | 0 |
| RFPL2     |  |              | 0 | N.A. | 0 |
| RFTN2     |  | 0,024597141  | 0 | N.A. | 0 |
| RFX4      |  | -0,062707975 | 0 | N.A. | 0 |
| RFX8      |  |              | 0 | N.A. | 0 |
| RGAG1     |  |              | 0 | N.A. | 0 |
| RGPD2     |  | -0,015674807 | 0 | N.A. | 0 |
| RGPD3     |  |              | 0 | N.A. | 0 |
| RGPD4     |  |              | 0 | N.A. | 0 |
| RGPD4-AS1 |  | 0,120332208  | 0 | N.A. | 0 |
| RGPD6     |  | -0,020463653 | 0 | N.A. | 0 |
| RGS18     |  |              | 0 | N.A. | 0 |
| RGS22     |  | 0,021957073  | 0 | N.A. | 0 |
| RGS7BP    |  |              | 0 | N.A. | 0 |
| RGSL1     |  | -0,025234084 | 0 | N.A. | 0 |
| RHD       |  |              | 0 | N.A. | 0 |



|              |  |              |   |      |   |
|--------------|--|--------------|---|------|---|
| RHO          |  |              | 0 | N.A. | 0 |
| RIMBP3C      |  |              | 0 | N.A. | 0 |
| RIMS1        |  |              | 0 | N.A. | 0 |
| RIMS4        |  |              | 0 | N.A. | 0 |
| RIPPLY2      |  | 0,107473348  | 0 | N.A. | 0 |
| RIT2         |  |              | 0 | N.A. | 0 |
| RMDN2-AS1    |  |              | 0 | N.A. | 0 |
| RNASE10      |  |              | 0 | N.A. | 0 |
| RNASE2       |  |              | 0 | N.A. | 0 |
| RNASE3       |  |              | 0 | N.A. | 0 |
| RNF103-CHMP3 |  | 0,036189464  | 0 | N.A. | 0 |
| RNF150       |  |              | 0 | N.A. | 0 |
| RNF17        |  |              | 0 | N.A. | 0 |
| RNF175       |  |              | 0 | N.A. | 0 |
| RNF212B      |  |              | 0 | N.A. | 0 |
| RNF219-AS1   |  | 0,151043365  | 0 | N.A. | 0 |
| RNF224       |  | 0,090361061  | 0 | N.A. | 0 |
| ROPN1        |  |              | 0 | N.A. | 0 |
| ROPN1B       |  | -0,133291339 | 0 | N.A. | 0 |
| ROPN1L       |  | -0,066373777 | 0 | N.A. | 0 |
| RORB         |  |              | 0 | N.A. | 0 |
| ROS1         |  | 0,057866813  | 0 | N.A. | 0 |
| RP1          |  | 0,281968515  | 0 | N.A. | 0 |
| RP1-101G11.3 |  | 0,329926764  | 0 | N.A. | 0 |
| RP1-101K10.6 |  |              | 0 | N.A. | 0 |
| RP1-102D24.5 |  |              | 0 | N.A. | 0 |
| RP1-102G20.5 |  |              | 0 | N.A. | 0 |
| RP1-102K2.6  |  | 0,030490663  | 0 | N.A. | 0 |
| RP1-111B22.3 |  |              | 0 | N.A. | 0 |
| RP1-111C20.3 |  |              | 0 | N.A. | 0 |
| RP1-111D6.2  |  |              | 0 | N.A. | 0 |
| RP1-111D6.3  |  |              | 0 | N.A. | 0 |
| RP1-118J21.5 |  | -0,149805262 | 0 | N.A. | 0 |

|              |  |              |   |      |   |
|--------------|--|--------------|---|------|---|
| RP1-122K4.3  |  |              | 0 | N.A. | 0 |
| RP1-122O8.7  |  | -0,21966926  | 0 | N.A. | 0 |
| RP1-124C6.1  |  |              | 0 | N.A. | 0 |
| RP1-127D3.4  |  |              | 0 | N.A. | 0 |
| RP1-127L4.7  |  |              | 0 | N.A. | 0 |
| RP1-12G14.9  |  | -0,079793303 | 0 | N.A. | 0 |
| RP1-135L22.1 |  |              | 0 | N.A. | 0 |
| RP1-136B1.1  |  | -0,088807712 | 0 | N.A. | 0 |
| RP1-137D17.1 |  |              | 0 | N.A. | 0 |
| RP1-137D17.2 |  | 0,091423349  | 0 | N.A. | 0 |
| RP1-137K2.2  |  | 0,037302611  | 0 | N.A. | 0 |
| RP1-142L7.5  |  |              | 0 | N.A. | 0 |
| RP1-142L7.9  |  | 0,27530734   | 0 | N.A. | 0 |
| RP1-148H17.1 |  |              | 0 | N.A. | 0 |
| RP1-149A16.3 |  |              | 0 | N.A. | 0 |
| RP1-149L1.1  |  |              | 0 | N.A. | 0 |
| RP1-151B14.6 |  |              | 0 | N.A. | 0 |
| RP1-153P14.5 |  |              | 0 | N.A. | 0 |
| RP1-153P14.8 |  |              | 0 | N.A. | 0 |
| RP1-154K9.2  |  |              | 0 | N.A. | 0 |
| RP1-155D22.2 |  |              | 0 | N.A. | 0 |
| RP1-15D23.2  |  |              | 0 | N.A. | 0 |
| RP1-163M9.7  |  |              | 0 | N.A. | 0 |
| RP1-166H4.2  |  |              | 0 | N.A. | 0 |
| RP1-167A14.2 |  | -0,216713575 | 0 | N.A. | 0 |
| RP1-17K7.2   |  |              | 0 | N.A. | 0 |
| RP1-193H18.3 |  |              | 0 | N.A. | 0 |
| RP1-197B17.4 |  |              | 0 | N.A. | 0 |
| RP1-207H1.3  |  |              | 0 | N.A. | 0 |
| RP1-212P9.3  |  |              | 0 | N.A. | 0 |
| RP1-225E12.2 |  |              | 0 | N.A. | 0 |
| RP1-232P20.1 |  |              | 0 | N.A. | 0 |
| RP1-23E21.2  |  |              | 0 | N.A. | 0 |

|              |  |              |      |      |
|--------------|--|--------------|------|------|
| RP1-241P17.1 |  | 0            | N.A. | 0    |
| RP1-249F5.3  |  | 0            | N.A. | 0    |
| RP1-253P7.4  |  | -0,028490556 | 0    | N.A. |
| RP1-256G22.2 |  | 0            | N.A. | 0    |
| RP1-265C24.8 |  | 0            | N.A. | 0    |
| RP1-267L14.3 |  | 0            | N.A. | 0    |
| RP1-278C19.8 |  | 0,305838193  | 0    | N.A. |
| RP1-27K12.4  |  | 0            | N.A. | 0    |
| RP1-283K11.3 |  | 0            | N.A. | 0    |
| RP1-286D6.5  |  | -0,112237429 | 0    | N.A. |
| RP1-28O10.1  |  | -0,284561521 | 0    | N.A. |
| RP1-290I10.7 |  | 0            | N.A. | 0    |
| RP1-292B18.3 |  | 0            | N.A. | 0    |
| RP1-29C18.10 |  | 0            | N.A. | 0    |
| RP1-29C18.9  |  | 0            | N.A. | 0    |
| RP1-309F20.4 |  | -0,087716437 | 0    | N.A. |
| RP1-30E17.2  |  | 0,341393322  | 0    | N.A. |
| RP1-30M3.6   |  | 0            | N.A. | 0    |
| RP1-310O13.7 |  | 0            | N.A. | 0    |
| RP1-313L4.3  |  | 0            | N.A. | 0    |
| RP1-34H18.1  |  | 0            | N.A. | 0    |
| RP1-35C21.1  |  | 0            | N.A. | 0    |
| RP1-37E16.12 |  | 0,256013796  | 0    | N.A. |
| RP1-38C16.2  |  | 0            | N.A. | 0    |
| RP1-41P2.7   |  | 0            | N.A. | 0    |
| RP1-45C12.1  |  | 0            | N.A. | 0    |
| RP1-45N11.1  |  | 0,147060278  | 0    | N.A. |
| RP1-55C23.7  |  | 0            | N.A. | 0    |
| RP1-56K13.3  |  | 0            | N.A. | 0    |
| RP1-56K13.5  |  | 0            | N.A. | 0    |
| RP1-59D14.10 |  | 0,255234424  | 0    | N.A. |
| RP1-59D14.5  |  | -0,025234084 | 0    | N.A. |
| RP1-506.5    |  | 0,096817909  | 0    | N.A. |

|                |  |              |      |      |   |
|----------------|--|--------------|------|------|---|
| RP1-60O19.2    |  | 0            | N.A. | 0    |   |
| RP1-65P5.5     |  | 0            | N.A. | 0    |   |
| RP1-69D17.3    |  | -0,002393069 | 0    | N.A. | 0 |
| RP1-69D17.4    |  | 0            | N.A. | 0    |   |
| RP1-69M21.2    |  | -0,257169163 | 0    | N.A. | 0 |
| RP1-78O14.1    |  | -0,005496725 | 0    | N.A. | 0 |
| RP1-81P11.1    |  | 0            | N.A. | 0    |   |
| RP1-90G24.11   |  | 0            | N.A. | 0    |   |
| RP1-90J20.8    |  | 0            | N.A. | 0    |   |
| RP1-90J4.1     |  | 0            | N.A. | 0    |   |
| RP1-90K10.4    |  | 0            | N.A. | 0    |   |
| RP1-90L14.1    |  | 0            | N.A. | 0    |   |
| RP1-90L6.3     |  | 0            | N.A. | 0    |   |
| RP1-91J24.3    |  | 0            | N.A. | 0    |   |
| RP1-92O14.6    |  | -0,073596332 | 0    | N.A. | 0 |
| RP1-93H18.1    |  | 0,098657128  | 0    | N.A. | 0 |
| RP1-97G4.1     |  | 0            | N.A. | 0    |   |
| RP11-1006G14.2 |  | 0,142124569  | 0    | N.A. | 0 |
| RP11-1008C21.1 |  | 0            | N.A. | 0    |   |
| RP11-100L22.1  |  | 0            | N.A. | 0    |   |
| RP11-100N20.1  |  | 0,09592698   | 0    | N.A. | 0 |
| RP11-1012A1.4  |  | 0            | N.A. | 0    |   |
| RP11-1018N14.5 |  | 0            | N.A. | 0    |   |
| RP11-101C11.1  |  | 0            | N.A. | 0    |   |
| RP11-101E5.1   |  | 0            | N.A. | 0    |   |
| RP11-1026M7.2  |  | 0,010413208  | 0    | N.A. | 0 |
| RP11-1029J19.4 |  | 0,254986171  | 0    | N.A. | 0 |
| RP11-1029J19.5 |  | 0,187771762  | 0    | N.A. | 0 |
| RP11-102G14.1  |  | 0,089814695  | 0    | N.A. | 0 |
| RP11-102L12.2  |  | 0            | N.A. | 0    |   |
| RP11-102N11.1  |  | 0            | N.A. | 0    |   |
| RP11-1030E3.1  |  | 0            | N.A. | 0    |   |
| RP11-1035H13.3 |  | 0            | N.A. | 0    |   |

|                 |              |   |      |   |
|-----------------|--------------|---|------|---|
| RP11-1038A11.2  | 0,273065756  | 0 | N.A. | 0 |
| RP11-1038A11.3  |              | 0 | N.A. | 0 |
| RP11-103C16.2   |              | 0 | N.A. | 0 |
| RP11-103H7.2    |              | 0 | N.A. | 0 |
| RP11-103H7.5    | -0,157360424 | 0 | N.A. | 0 |
| RP11-104E19.1   |              | 0 | N.A. | 0 |
| RP11-104H15.8   |              | 0 | N.A. | 0 |
| RP11-104H15.9   |              | 0 | N.A. | 0 |
| RP11-1055B8.3   | 0,113042075  | 0 | N.A. | 0 |
| RP11-105N14.3   |              | 0 | N.A. | 0 |
| RP11-1060G2.1   | -0,040945974 | 0 | N.A. | 0 |
| RP11-106M3.2    |              | 0 | N.A. | 0 |
| RP11-106M3.3    | -0,085459169 | 0 | N.A. | 0 |
| RP11-106M7.1    | 0,001047933  | 0 | N.A. | 0 |
| RP11-1070N10.3  |              | 0 | N.A. | 0 |
| RP11-1072C15.4  | 0,02755381   | 0 | N.A. | 0 |
| RP11-1079K10.3  |              | 0 | N.A. | 0 |
| RP11-107F6.3    |              | 0 | N.A. | 0 |
| RP11-1080G15.1  |              | 0 | N.A. | 0 |
| RP11-1081L13.4  | 0,322029999  | 0 | N.A. | 0 |
| RP11-1084A12.2  |              | 0 | N.A. | 0 |
| RP11-1084E5.1   | 0,096481216  | 0 | N.A. | 0 |
| RP11-108E14.1   | 0,057294996  | 0 | N.A. | 0 |
| RP11-108K14.12  |              | 0 | N.A. | 0 |
| RP11-108K14.8   |              | 0 | N.A. | 0 |
| RP11-108L7.14   | -0,121763428 | 0 | N.A. | 0 |
| RP11-108L7.4    | 0,226462937  | 0 | N.A. | 0 |
| RP11-108M9.3    |              | 0 | N.A. | 0 |
| RP11-108O10.2   |              | 0 | N.A. | 0 |
| RP11-108P20.4   |              | 0 | N.A. | 0 |
| RP11-1090M7.1   | 0,178645822  | 0 | N.A. | 0 |
| RP11-1094M14.12 |              | 0 | N.A. | 0 |
| RP11-1096G20.5  |              | 0 | N.A. | 0 |

|                |              |   |      |   |
|----------------|--------------|---|------|---|
| RP11-109A6.3   | 0,04178844   | 0 | N.A. | 0 |
| RP11-109E24.1  |              | 0 | N.A. | 0 |
| RP11-109E24.2  |              | 0 | N.A. | 0 |
| RP11-109M19.1  |              | 0 | N.A. | 0 |
| RP11-109P14.10 |              | 0 | N.A. | 0 |
| RP11-109P14.9  | 0,014194687  | 0 | N.A. | 0 |
| RP11-10A14.9   | -0,111240054 | 0 | N.A. | 0 |
| RP11-10C8.2    |              | 0 | N.A. | 0 |
| RP11-10J21.4   |              | 0 | N.A. | 0 |
| RP11-10J21.5   |              | 0 | N.A. | 0 |
| RP11-10J5.1    |              | 0 | N.A. | 0 |
| RP11-10K17.6   |              | 0 | N.A. | 0 |
| RP11-10L7.1    | 0,014722007  | 0 | N.A. | 0 |
| RP11-10N23.2   |              | 0 | N.A. | 0 |
| RP11-10N23.5   | 0,017038737  | 0 | N.A. | 0 |
| RP11-1102P16.1 | -0,118437992 | 0 | N.A. | 0 |
| RP11-1105G2.4  | -0,120232798 | 0 | N.A. | 0 |
| RP11-1109F11.3 |              | 0 | N.A. | 0 |
| RP11-110I1.12  | 0,056783282  | 0 | N.A. | 0 |
| RP11-111A22.1  |              | 0 | N.A. | 0 |
| RP11-111E14.1  |              | 0 | N.A. | 0 |
| RP11-111I12.1  | -0,153881635 | 0 | N.A. | 0 |
| RP11-111M22.5  |              | 0 | N.A. | 0 |
| RP11-112L6.3   | 0,223442761  | 0 | N.A. | 0 |
| RP11-1134I14.8 |              | 0 | N.A. | 0 |
| RP11-1136G4.1  | 0,342649228  | 0 | N.A. | 0 |
| RP11-1136J12.1 | 0,070361615  | 0 | N.A. | 0 |
| RP11-113K21.4  |              | 0 | N.A. | 0 |
| RP11-113O24.3  |              | 0 | N.A. | 0 |
| RP11-1144P22.1 |              | 0 | N.A. | 0 |
| RP11-1149M10.1 |              | 0 | N.A. | 0 |
| RP11-1149M10.2 |              | 0 | N.A. | 0 |
| RP11-114B7.6   | -0,270373881 | 0 | N.A. | 0 |

|                |  |              |      |      |   |
|----------------|--|--------------|------|------|---|
| RP11-114F10.2  |  | 0            | N.A. | 0    |   |
| RP11-114G11.5  |  | -0,242626229 | 0    | N.A. | 0 |
| RP11-114G22.1  |  |              | 0    | N.A. | 0 |
| RP11-114H23.1  |  | 0,138491791  | 0    | N.A. | 0 |
| RP11-114H23.2  |  | -0,055873899 | 0    | N.A. | 0 |
| RP11-114H24.6  |  |              | 0    | N.A. | 0 |
| RP11-114J13.1  |  |              | 0    | N.A. | 0 |
| RP11-114M1.1   |  | -0,038099692 | 0    | N.A. | 0 |
| RP11-114M1.2   |  |              | 0    | N.A. | 0 |
| RP11-114N19.3  |  | -0,021143245 | 0    | N.A. | 0 |
| RP11-114O18.1  |  | 0,322102716  | 0    | N.A. | 0 |
| RP11-1151B14.3 |  |              | 0    | N.A. | 0 |
| RP11-1152H15.1 |  |              | 0    | N.A. | 0 |
| RP11-115D19.2  |  | 0,062658061  | 0    | N.A. | 0 |
| RP11-115H18.1  |  |              | 0    | N.A. | 0 |
| RP11-115J16.1  |  |              | 0    | N.A. | 0 |
| RP11-115J16.2  |  | 0,2878873    | 0    | N.A. | 0 |
| RP11-115J23.1  |  | 0,257463765  | 0    | N.A. | 0 |
| RP11-115N4.1   |  |              | 0    | N.A. | 0 |
| RP11-1167A19.2 |  |              | 0    | N.A. | 0 |
| RP11-116D17.3  |  | 0,091636392  | 0    | N.A. | 0 |
| RP11-116D17.4  |  |              | 0    | N.A. | 0 |
| RP11-117D22.2  |  |              | 0    | N.A. | 0 |
| RP11-117L5.4   |  | 0,260547928  | 0    | N.A. | 0 |
| RP11-118B18.2  |  |              | 0    | N.A. | 0 |
| RP11-118B22.4  |  |              | 0    | N.A. | 0 |
| RP11-118F19.1  |  |              | 0    | N.A. | 0 |
| RP11-1191J2.2  |  |              | 0    | N.A. | 0 |
| RP11-1191J2.5  |  |              | 0    | N.A. | 0 |
| RP11-119D18.1  |  |              | 0    | N.A. | 0 |
| RP11-119J18.1  |  | -0,235849003 | 0    | N.A. | 0 |
| RP11-11C20.3   |  |              | 0    | N.A. | 0 |
| RP11-11N7.5    |  | 0,053219496  | 0    | N.A. | 0 |

|                |              |   |      |   |
|----------------|--------------|---|------|---|
| RP11-120C12.3  |              | 0 | N.A. | 0 |
| RP11-120K9.2   |              | 0 | N.A. | 0 |
| RP11-1212A22.4 | 0,113661337  | 0 | N.A. | 0 |
| RP11-121A14.2  |              | 0 | N.A. | 0 |
| RP11-121A8.1   |              | 0 | N.A. | 0 |
| RP11-1228E12.1 |              | 0 | N.A. | 0 |
| RP11-1228E12.2 | 0,056217302  | 0 | N.A. | 0 |
| RP11-122K13.12 | -0,083651207 | 0 | N.A. | 0 |
| RP11-122L4.1   |              | 0 | N.A. | 0 |
| RP11-122M14.1  | -0,145824683 | 0 | N.A. | 0 |
| RP11-123O22.1  |              | 0 | N.A. | 0 |
| RP11-124N2.1   | 0,197796069  | 0 | N.A. | 0 |
| RP11-125O15.3  |              | 0 | N.A. | 0 |
| RP11-125O18.1  |              | 0 | N.A. | 0 |
| RP11-1260E13.1 | -0,016227897 | 0 | N.A. | 0 |
| RP11-1260E13.3 |              | 0 | N.A. | 0 |
| RP11-126H7.4   | -0,051717513 | 0 | N.A. | 0 |
| RP11-126K1.8   |              | 0 | N.A. | 0 |
| RP11-126K15.1  |              | 0 | N.A. | 0 |
| RP11-126O1.2   |              | 0 | N.A. | 0 |
| RP11-126O1.6   |              | 0 | N.A. | 0 |
| RP11-127B16.1  | -0,159945608 | 0 | N.A. | 0 |
| RP11-127I20.5  | 0,241254325  | 0 | N.A. | 0 |
| RP11-128A17.2  | 0,082131203  | 0 | N.A. | 0 |
| RP11-129I19.2  |              | 0 | N.A. | 0 |
| RP11-129J12.1  |              | 0 | N.A. | 0 |
| RP11-129K12.1  |              | 0 | N.A. | 0 |
| RP11-129M6.1   |              | 0 | N.A. | 0 |
| RP11-12A2.3    |              | 0 | N.A. | 0 |
| RP11-12D24.10  |              | 0 | N.A. | 0 |
| RP11-12J10.4   |              | 0 | N.A. | 0 |
| RP11-12M5.3    |              | 0 | N.A. | 0 |
| RP11-12M5.4    | 0,034357583  | 0 | N.A. | 0 |



|                |  |              |   |      |   |
|----------------|--|--------------|---|------|---|
| RP11-130C6.1   |  | -0,231788321 | 0 | N.A. | 0 |
| RP11-131K5.1   |  |              | 0 | N.A. | 0 |
| RP11-131K5.2   |  |              | 0 | N.A. | 0 |
| RP11-131L12.4  |  | 0,07146445   | 0 | N.A. | 0 |
| RP11-132N15.2  |  | 0,111156675  | 0 | N.A. | 0 |
| RP11-132N15.3  |  |              | 0 | N.A. | 0 |
| RP11-1336O20.2 |  | 0,271802512  | 0 | N.A. | 0 |
| RP11-133F8.2   |  |              | 0 | N.A. | 0 |
| RP11-133K1.6   |  | -0,081060161 | 0 | N.A. | 0 |
| RP11-133L14.5  |  |              | 0 | N.A. | 0 |
| RP11-134N1.2   |  |              | 0 | N.A. | 0 |
| RP11-134O21.1  |  | -0,176074872 | 0 | N.A. | 0 |
| RP11-135A1.3   |  |              | 0 | N.A. | 0 |
| RP11-135A24.4  |  | 0,285222157  | 0 | N.A. | 0 |
| RP11-135D11.2  |  |              | 0 | N.A. | 0 |
| RP11-136F16.1  |  |              | 0 | N.A. | 0 |
| RP11-136H19.1  |  |              | 0 | N.A. | 0 |
| RP11-1376P16.1 |  |              | 0 | N.A. | 0 |
| RP11-138B4.1   |  |              | 0 | N.A. | 0 |
| RP11-138H10.2  |  |              | 0 | N.A. | 0 |
| RP11-138H8.2   |  |              | 0 | N.A. | 0 |
| RP11-138I18.1  |  |              | 0 | N.A. | 0 |
| RP11-13A1.1    |  |              | 0 | N.A. | 0 |
| RP11-13A1.3    |  |              | 0 | N.A. | 0 |
| RP11-13J8.1    |  | -0,037106033 | 0 | N.A. | 0 |
| RP11-13K12.2   |  |              | 0 | N.A. | 0 |
| RP11-13P5.1    |  |              | 0 | N.A. | 0 |
| RP11-13P5.2    |  |              | 0 | N.A. | 0 |
| RP11-1406H17.1 |  |              | 0 | N.A. | 0 |
| RP11-141M1.3   |  | -0,001925526 | 0 | N.A. | 0 |
| RP11-142A12.1  |  |              | 0 | N.A. | 0 |
| RP11-142A23.1  |  |              | 0 | N.A. | 0 |
| RP11-142C4.6   |  |              | 0 | N.A. | 0 |

|               |              |   |      |   |
|---------------|--------------|---|------|---|
| RP11-142G1.3  |              | 0 | N.A. | 0 |
| RP11-142M10.2 |              | 0 | N.A. | 0 |
| RP11-143I21.1 | 0,08109109   | 0 | N.A. | 0 |
| RP11-143J12.3 |              | 0 | N.A. | 0 |
| RP11-143K11.7 |              | 0 | N.A. | 0 |
| RP11-143M1.3  |              | 0 | N.A. | 0 |
| RP11-144F15.1 |              | 0 | N.A. | 0 |
| RP11-144G7.2  |              | 0 | N.A. | 0 |
| RP11-145A3.1  |              | 0 | N.A. | 0 |
| RP11-145E17.2 |              | 0 | N.A. | 0 |
| RP11-145G20.1 |              | 0 | N.A. | 0 |
| RP11-145M9.5  |              | 0 | N.A. | 0 |
| RP11-145M9.6  | -0,011449508 | 0 | N.A. | 0 |
| RP11-146F11.5 | 0,045074285  | 0 | N.A. | 0 |
| RP11-146I2.1  |              | 0 | N.A. | 0 |
| RP11-146N23.4 |              | 0 | N.A. | 0 |
| RP11-147L13.8 |              | 0 | N.A. | 0 |
| RP11-148B6.1  | -0,09039104  | 0 | N.A. | 0 |
| RP11-148K1.10 |              | 0 | N.A. | 0 |
| RP11-148K1.12 | -0,189416607 | 0 | N.A. | 0 |
| RP11-148L24.1 |              | 0 | N.A. | 0 |
| RP11-149I23.3 |              | 0 | N.A. | 0 |
| RP11-14C22.3  |              | 0 | N.A. | 0 |
| RP11-14C22.6  |              | 0 | N.A. | 0 |
| RP11-150D20.5 |              | 0 | N.A. | 0 |
| RP11-150O12.1 |              | 0 | N.A. | 0 |
| RP11-150O12.4 |              | 0 | N.A. | 0 |
| RP11-152H18.3 |              | 0 | N.A. | 0 |
| RP11-152P23.2 | 0,32078436   | 0 | N.A. | 0 |
| RP11-153M7.5  |              | 0 | N.A. | 0 |
| RP11-154B12.3 |              | 0 | N.A. | 0 |
| RP11-154D17.1 |              | 0 | N.A. | 0 |
| RP11-154H12.2 |              | 0 | N.A. | 0 |

|                |              |   |      |   |
|----------------|--------------|---|------|---|
| RP11-154H12.3  |              | 0 | N.A. | 0 |
| RP11-155L15.1  |              | 0 | N.A. | 0 |
| RP11-155O18.6  |              | 0 | N.A. | 0 |
| RP11-156K13.3  |              | 0 | N.A. | 0 |
| RP11-157B13.7  |              | 0 | N.A. | 0 |
| RP11-157D23.2  |              | 0 | N.A. | 0 |
| RP11-157E16.1  | 0,064575337  | 0 | N.A. | 0 |
| RP11-157E21.1  |              | 0 | N.A. | 0 |
| RP11-157I4.4   | -0,080264754 | 0 | N.A. | 0 |
| RP11-157J24.2  | -0,015387699 | 0 | N.A. | 0 |
| RP11-158D2.2   | 0,025583232  | 0 | N.A. | 0 |
| RP11-158I9.5   |              | 0 | N.A. | 0 |
| RP11-158M2.2   |              | 0 | N.A. | 0 |
| RP11-158M2.3   | -0,077666804 | 0 | N.A. | 0 |
| RP11-158M2.4   |              | 0 | N.A. | 0 |
| RP11-159D12.10 |              | 0 | N.A. | 0 |
| RP11-159F24.6  | 0,044112527  | 0 | N.A. | 0 |
| RP11-159H22.2  | 0,254233288  | 0 | N.A. | 0 |
| RP11-15A1.2    |              | 0 | N.A. | 0 |
| RP11-15B17.1   |              | 0 | N.A. | 0 |
| RP11-15B24.4   |              | 0 | N.A. | 0 |
| RP11-15B24.5   |              | 0 | N.A. | 0 |
| RP11-15E1.5    |              | 0 | N.A. | 0 |
| RP11-15F12.3   | 0,018448765  | 0 | N.A. | 0 |
| RP11-15I11.2   |              | 0 | N.A. | 0 |
| RP11-15I20.1   |              | 0 | N.A. | 0 |
| RP11-15L13.4   | 0,214937481  | 0 | N.A. | 0 |
| RP11-160E2.11  |              | 0 | N.A. | 0 |
| RP11-160E2.17  |              | 0 | N.A. | 0 |
| RP11-160E2.19  | -0,173304306 | 0 | N.A. | 0 |
| RP11-160N1.10  |              | 0 | N.A. | 0 |
| RP11-161D15.1  |              | 0 | N.A. | 0 |
| RP11-161D15.2  |              | 0 | N.A. | 0 |

|               |              |   |      |   |
|---------------|--------------|---|------|---|
| RP11-161H23.5 | 0,236858659  | 0 | N.A. | 0 |
| RP11-161H23.9 |              | 0 | N.A. | 0 |
| RP11-161I2.1  | -0,03847024  | 0 | N.A. | 0 |
| RP11-161I6.2  | 0,36768246   | 0 | N.A. | 0 |
| RP11-164O23.8 |              | 0 | N.A. | 0 |
| RP11-165F24.3 | -0,189787438 | 0 | N.A. | 0 |
| RP11-166A12.1 |              | 0 | N.A. | 0 |
| RP11-166B2.5  |              | 0 | N.A. | 0 |
| RP11-166B2.7  |              | 0 | N.A. | 0 |
| RP11-166N17.1 |              | 0 | N.A. | 0 |
| RP11-167B3.3  |              | 0 | N.A. | 0 |
| RP11-167H9.4  |              | 0 | N.A. | 0 |
| RP11-167J8.3  | 0,066328557  | 0 | N.A. | 0 |
| RP11-167N4.2  |              | 0 | N.A. | 0 |
| RP11-168K11.2 |              | 0 | N.A. | 0 |
| RP11-168L22.2 |              | 0 | N.A. | 0 |
| RP11-169D4.2  |              | 0 | N.A. | 0 |
| RP11-169K16.4 | 0,008710349  | 0 | N.A. | 0 |
| RP11-169K17.3 |              | 0 | N.A. | 0 |
| RP11-169K17.4 |              | 0 | N.A. | 0 |
| RP11-16B13.1  |              | 0 | N.A. | 0 |
| RP11-16C1.1   | 0,072565575  | 0 | N.A. | 0 |
| RP11-16C1.3   |              | 0 | N.A. | 0 |
| RP11-16E23.5  |              | 0 | N.A. | 0 |
| RP11-16L21.7  |              | 0 | N.A. | 0 |
| RP11-16N2.1   | 0,142027372  | 0 | N.A. | 0 |
| RP11-16P20.3  |              | 0 | N.A. | 0 |
| RP11-170M17.1 |              | 0 | N.A. | 0 |
| RP11-170N16.3 | 0,044789428  | 0 | N.A. | 0 |
| RP11-171I2.1  |              | 0 | N.A. | 0 |
| RP11-171I2.3  |              | 0 | N.A. | 0 |
| RP11-171I2.4  | 0,070361615  | 0 | N.A. | 0 |
| RP11-172E10.1 |              | 0 | N.A. | 0 |

|               |  |              |      |      |
|---------------|--|--------------|------|------|
| RP11-172E9.2  |  | 0            | N.A. | 0    |
| RP11-173A16.1 |  | 0            | N.A. | 0    |
| RP11-173M1.4  |  | -0,248262729 | 0    | N.A. |
| RP11-173P15.3 |  | -0,023656369 | 0    | N.A. |
| RP11-174G6.1  |  | 0,005283039  | 0    | N.A. |
| RP11-174J11.1 |  | 0            | N.A. | 0    |
| RP11-175D17.3 |  | -0,139420794 | 0    | N.A. |
| RP11-175K6.1  |  | 0            | N.A. | 0    |
| RP11-175P13.2 |  | 0            | N.A. | 0    |
| RP11-177F15.1 |  | 0,055374917  | 0    | N.A. |
| RP11-177G23.2 |  | 0,136220507  | 0    | N.A. |
| RP11-178F10.2 |  | 0            | N.A. | 0    |
| RP11-178L8.3  |  | 0            | N.A. | 0    |
| RP11-178L8.9  |  | 0            | N.A. | 0    |
| RP11-179A16.1 |  | 0            | N.A. | 0    |
| RP11-179B15.6 |  | 0            | N.A. | 0    |
| RP11-17A1.3   |  | 0,027887752  | 0    | N.A. |
| RP11-17A4.2   |  | -0,142826893 | 0    | N.A. |
| RP11-180C16.1 |  | -0,028103058 | 0    | N.A. |
| RP11-180I4.2  |  | 0            | N.A. | 0    |
| RP11-180M15.4 |  | 0            | N.A. | 0    |
| RP11-180O5.2  |  | 0            | N.A. | 0    |
| RP11-180P8.3  |  | 0            | N.A. | 0    |
| RP11-181B11.2 |  | 0            | N.A. | 0    |
| RP11-181G12.4 |  | 0            | N.A. | 0    |
| RP11-181K12.2 |  | 0,462789983  | 0    | N.A. |
| RP11-181K3.4  |  | 0,378514221  | 0    | N.A. |
| RP11-182J1.1  |  | 0            | N.A. | 0    |
| RP11-182J1.13 |  | 0            | N.A. | 0    |
| RP11-182J1.17 |  | 0            | N.A. | 0    |
| RP11-182M20.2 |  | 0            | N.A. | 0    |
| RP11-182N22.8 |  | 0,125515091  | 0    | N.A. |
| RP11-184A2.2  |  | -0,092226719 | 0    | N.A. |

|               |              |   |      |   |
|---------------|--------------|---|------|---|
| RP11-184A2.3  |              | 0 | N.A. | 0 |
| RP11-184M15.1 | 0,348770047  | 0 | N.A. | 0 |
| RP11-184M15.2 | 0,237871634  | 0 | N.A. | 0 |
| RP11-185E12.2 |              | 0 | N.A. | 0 |
| RP11-185E8.1  | 0,03281444   | 0 | N.A. | 0 |
| RP11-187A9.3  |              | 0 | N.A. | 0 |
| RP11-187O7.3  |              | 0 | N.A. | 0 |
| RP11-188C12.3 |              | 0 | N.A. | 0 |
| RP11-188D8.1  | 0,044323418  | 0 | N.A. | 0 |
| RP11-18B16.2  |              | 0 | N.A. | 0 |
| RP11-18I14.11 | 0,065282108  | 0 | N.A. | 0 |
| RP11-190P13.2 |              | 0 | N.A. | 0 |
| RP11-191N8.2  |              | 0 | N.A. | 0 |
| RP11-192H23.5 |              | 0 | N.A. | 0 |
| RP11-192H23.7 | -0,007192592 | 0 | N.A. | 0 |
| RP11-192P3.4  |              | 0 | N.A. | 0 |
| RP11-193M21.1 |              | 0 | N.A. | 0 |
| RP11-195M16.3 |              | 0 | N.A. | 0 |
| RP11-196E1.3  |              | 0 | N.A. | 0 |
| RP11-196H14.2 |              | 0 | N.A. | 0 |
| RP11-197K3.1  | 0,096295576  | 0 | N.A. | 0 |
| RP11-197N18.7 |              | 0 | N.A. | 0 |
| RP11-19N8.4   |              | 0 | N.A. | 0 |
| RP11-1B20.1   |              | 0 | N.A. | 0 |
| RP11-1C8.6    |              | 0 | N.A. | 0 |
| RP11-1E22.1   |              | 0 | N.A. | 0 |
| RP11-1H15.2   |              | 0 | N.A. | 0 |
| RP11-1M18.1   |              | 0 | N.A. | 0 |
| RP11-200A1.1  | 0,042118838  | 0 | N.A. | 0 |
| RP11-201E8.1  |              | 0 | N.A. | 0 |
| RP11-202G11.2 | 0,41735398   | 0 | N.A. | 0 |
| RP11-202G18.1 |              | 0 | N.A. | 0 |
| RP11-203B7.2  |              | 0 | N.A. | 0 |

|               |             |   |      |   |
|---------------|-------------|---|------|---|
| RP11-203E8.1  |             | 0 | N.A. | 0 |
| RP11-203J24.8 | 0,177497689 | 0 | N.A. | 0 |
| RP11-203M5.2  |             | 0 | N.A. | 0 |
| RP11-203M5.7  |             | 0 | N.A. | 0 |
| RP11-204L24.2 | 0,119636986 | 0 | N.A. | 0 |
| RP11-205K6.1  |             | 0 | N.A. | 0 |
| RP11-205M3.3  |             | 0 | N.A. | 0 |
| RP11-206M11.7 |             | 0 | N.A. | 0 |
| RP11-209D14.2 |             | 0 | N.A. | 0 |
| RP11-209E8.1  | 0,236229665 | 0 | N.A. | 0 |
| RP11-20B24.2  |             | 0 | N.A. | 0 |
| RP11-20B24.4  |             | 0 | N.A. | 0 |
| RP11-20B24.5  |             | 0 | N.A. | 0 |
| RP11-20B24.6  |             | 0 | N.A. | 0 |
| RP11-20B24.7  |             | 0 | N.A. | 0 |
| RP11-20B7.1   |             | 0 | N.A. | 0 |
| RP11-20G13.2  |             | 0 | N.A. | 0 |
| RP11-20G6.2   |             | 0 | N.A. | 0 |
| RP11-20I23.3  |             | 0 | N.A. | 0 |
| RP11-20J15.3  |             | 0 | N.A. | 0 |
| RP11-20J15.5  |             | 0 | N.A. | 0 |
| RP11-210K20.2 |             | 0 | N.A. | 0 |
| RP11-211G3.2  |             | 0 | N.A. | 0 |
| RP11-211G3.3  |             | 0 | N.A. | 0 |
| RP11-211N11.5 |             | 0 | N.A. | 0 |
| RP11-212D19.4 | 0,226985603 | 0 | N.A. | 0 |
| RP11-212I21.2 |             | 0 | N.A. | 0 |
| RP11-212I21.5 |             | 0 | N.A. | 0 |
| RP11-213G6.2  |             | 0 | N.A. | 0 |
| RP11-213H15.4 |             | 0 | N.A. | 0 |
| RP11-214O1.2  |             | 0 | N.A. | 0 |
| RP11-214O1.3  |             | 0 | N.A. | 0 |
| RP11-215P8.4  |             | 0 | N.A. | 0 |

|                |  |              |      |   |
|----------------|--|--------------|------|---|
| RP11-216B9.9   |  | 0            | N.A. | 0 |
| RP11-216L13.17 |  | 0            | N.A. | 0 |
| RP11-216N14.9  |  | 0            | N.A. | 0 |
| RP11-217B7.3   |  | 0            | N.A. | 0 |
| RP11-218C14.5  |  | 0            | N.A. | 0 |
| RP11-218C14.8  |  | 0,223328552  | N.A. | 0 |
| RP11-218E20.3  |  | 0            | N.A. | 0 |
| RP11-218I7.2   |  | 0,142027372  | N.A. | 0 |
| RP11-218L14.4  |  | 0,004287949  | N.A. | 0 |
| RP11-218M22.2  |  | 0            | N.A. | 0 |
| RP11-219B4.3   |  | 0            | N.A. | 0 |
| RP11-219E7.1   |  | 0            | N.A. | 0 |
| RP11-219E7.3   |  | 0            | N.A. | 0 |
| RP11-21A7A.4   |  | 0            | N.A. | 0 |
| RP11-21C4.1    |  | 0            | N.A. | 0 |
| RP11-21K12.3   |  | 0            | N.A. | 0 |
| RP11-21L19.1   |  | 0            | N.A. | 0 |
| RP11-221J22.1  |  | 0            | N.A. | 0 |
| RP11-222K16.1  |  | 0            | N.A. | 0 |
| RP11-222K16.2  |  | -0,225987027 | N.A. | 0 |
| RP11-223P11.3  |  | -0,078534737 | N.A. | 0 |
| RP11-225H22.4  |  | 0            | N.A. | 0 |
| RP11-225N10.1  |  | 0            | N.A. | 0 |
| RP11-227D13.1  |  | 0            | N.A. | 0 |
| RP11-227D13.4  |  | 0,047932409  | N.A. | 0 |
| RP11-227D13.5  |  | 0            | N.A. | 0 |
| RP11-227G15.11 |  | 0,051650015  | N.A. | 0 |
| RP11-227G15.9  |  | 0            | N.A. | 0 |
| RP11-227H4.5   |  | 0            | N.A. | 0 |
| RP11-228B15.4  |  | 0,03158775   | N.A. | 0 |
| RP11-229E13.4  |  | 0            | N.A. | 0 |
| RP11-229P13.15 |  | 0            | N.A. | 0 |
| RP11-229P13.22 |  | 0,070250011  | N.A. | 0 |



|               |              |   |      |   |
|---------------|--------------|---|------|---|
| RP11-22P4.2   |              | 0 | N.A. | 0 |
| RP11-230B22.1 |              | 0 | N.A. | 0 |
| RP11-230C9.2  |              | 0 | N.A. | 0 |
| RP11-230C9.3  | 0,266497112  | 0 | N.A. | 0 |
| RP11-231C14.4 | -0,060494999 | 0 | N.A. | 0 |
| RP11-231N3.1  | 0,272497937  | 0 | N.A. | 0 |
| RP11-234G16.4 |              | 0 | N.A. | 0 |
| RP11-234G16.5 |              | 0 | N.A. | 0 |
| RP11-234K19.1 |              | 0 | N.A. | 0 |
| RP11-234K24.3 | 0,285224053  | 0 | N.A. | 0 |
| RP11-235C23.5 |              | 0 | N.A. | 0 |
| RP11-235G24.1 |              | 0 | N.A. | 0 |
| RP11-236B18.2 |              | 0 | N.A. | 0 |
| RP11-236B18.5 |              | 0 | N.A. | 0 |
| RP11-236L14.2 |              | 0 | N.A. | 0 |
| RP11-238K6.1  |              | 0 | N.A. | 0 |
| RP11-239E10.2 |              | 0 | N.A. | 0 |
| RP11-239E10.3 |              | 0 | N.A. | 0 |
| RP11-239H6.2  |              | 0 | N.A. | 0 |
| RP11-239L20.6 | 0,131601708  | 0 | N.A. | 0 |
| RP11-23E10.3  |              | 0 | N.A. | 0 |
| RP11-23N2.4   | 0,211323737  | 0 | N.A. | 0 |
| RP11-23P13.4  |              | 0 | N.A. | 0 |
| RP11-240G22.4 |              | 0 | N.A. | 0 |
| RP11-240M16.1 |              | 0 | N.A. | 0 |
| RP11-242F24.1 | 0,097264344  | 0 | N.A. | 0 |
| RP11-242G20.1 | -0,170847167 | 0 | N.A. | 0 |
| RP11-242J7.1  | -0,059055527 | 0 | N.A. | 0 |
| RP11-242P2.1  |              | 0 | N.A. | 0 |
| RP11-243J16.7 | 0,042909635  | 0 | N.A. | 0 |
| RP11-244F12.2 | 0,180184152  | 0 | N.A. | 0 |
| RP11-244N9.4  | 0,160506141  | 0 | N.A. | 0 |
| RP11-245P10.4 | 0,006801153  | 0 | N.A. | 0 |

|                |              |   |      |   |
|----------------|--------------|---|------|---|
| RP11-245P10.6  | 0,211323737  | 0 | N.A. | 0 |
| RP11-246A10.1  |              | 0 | N.A. | 0 |
| RP11-246K15.1  |              | 0 | N.A. | 0 |
| RP11-247C2.2   | -0,201814824 | 0 | N.A. | 0 |
| RP11-247I13.11 |              | 0 | N.A. | 0 |
| RP11-247L20.3  |              | 0 | N.A. | 0 |
| RP11-248G5.9   |              | 0 | N.A. | 0 |
| RP11-248J23.7  |              | 0 | N.A. | 0 |
| RP11-249C24.10 |              | 0 | N.A. | 0 |
| RP11-249C24.12 |              | 0 | N.A. | 0 |
| RP11-24C3.2    |              | 0 | N.A. | 0 |
| RP11-24N18.1   |              | 0 | N.A. | 0 |
| RP11-252C15.1  |              | 0 | N.A. | 0 |
| RP11-252E2.1   | -0,092369789 | 0 | N.A. | 0 |
| RP11-253A20.1  |              | 0 | N.A. | 0 |
| RP11-253D19.1  |              | 0 | N.A. | 0 |
| RP11-253I19.3  |              | 0 | N.A. | 0 |
| RP11-253M7.4   | 0,016508802  | 0 | N.A. | 0 |
| RP11-254F7.3   |              | 0 | N.A. | 0 |
| RP11-254I22.1  | 0,394520592  | 0 | N.A. | 0 |
| RP11-254I22.3  | 0,138707048  | 0 | N.A. | 0 |
| RP11-255C15.3  | 0,072923356  | 0 | N.A. | 0 |
| RP11-255G12.3  |              | 0 | N.A. | 0 |
| RP11-255H23.4  |              | 0 | N.A. | 0 |
| RP11-255P5.3   |              | 0 | N.A. | 0 |
| RP11-256I23.1  |              | 0 | N.A. | 0 |
| RP11-256I23.2  | 0,011204681  | 0 | N.A. | 0 |
| RP11-256I23.3  |              | 0 | N.A. | 0 |
| RP11-256L11.3  | -0,152118175 | 0 | N.A. | 0 |
| RP11-256L6.2   |              | 0 | N.A. | 0 |
| RP11-257O5.4   | 0,300528089  | 0 | N.A. | 0 |
| RP11-259O2.1   |              | 0 | N.A. | 0 |
| RP11-25I15.3   |              | 0 | N.A. | 0 |

|               |  |              |   |      |   |
|---------------|--|--------------|---|------|---|
| RP11-25L3.3   |  |              | 0 | N.A. | 0 |
| RP11-260E18.1 |  |              | 0 | N.A. | 0 |
| RP11-261P24.2 |  | -0,157360424 | 0 | N.A. | 0 |
| RP11-263K19.6 |  | -0,146560342 | 0 | N.A. | 0 |
| RP11-263K4.3  |  |              | 0 | N.A. | 0 |
| RP11-263K4.5  |  |              | 0 | N.A. | 0 |
| RP11-264B14.1 |  |              | 0 | N.A. | 0 |
| RP11-264B17.5 |  |              | 0 | N.A. | 0 |
| RP11-264E18.1 |  |              | 0 | N.A. | 0 |
| RP11-264E20.1 |  |              | 0 | N.A. | 0 |
| RP11-264E20.2 |  |              | 0 | N.A. | 0 |
| RP11-264I13.2 |  |              | 0 | N.A. | 0 |
| RP11-264L1.4  |  |              | 0 | N.A. | 0 |
| RP11-264M12.2 |  |              | 0 | N.A. | 0 |
| RP11-265D17.2 |  | 0,062151335  | 0 | N.A. | 0 |
| RP11-265D19.6 |  |              | 0 | N.A. | 0 |
| RP11-265N6.2  |  | -0,323634211 | 0 | N.A. | 0 |
| RP11-265N7.2  |  |              | 0 | N.A. | 0 |
| RP11-265P11.1 |  | 0,2878873    | 0 | N.A. | 0 |
| RP11-266A24.1 |  |              | 0 | N.A. | 0 |
| RP11-266K4.13 |  |              | 0 | N.A. | 0 |
| RP11-266K4.14 |  | 0,000299764  | 0 | N.A. | 0 |
| RP11-266N13.2 |  |              | 0 | N.A. | 0 |
| RP11-267A15.3 |  |              | 0 | N.A. | 0 |
| RP11-268F1.3  |  |              | 0 | N.A. | 0 |
| RP11-268G12.3 |  |              | 0 | N.A. | 0 |
| RP11-268P4.5  |  | 0,179732487  | 0 | N.A. | 0 |
| RP11-269C23.5 |  |              | 0 | N.A. | 0 |
| RP11-269F21.2 |  |              | 0 | N.A. | 0 |
| RP11-269G24.4 |  |              | 0 | N.A. | 0 |
| RP11-269M20.3 |  |              | 0 | N.A. | 0 |
| RP11-26J3.4   |  | -0,015440016 | 0 | N.A. | 0 |
| RP11-26M5.3   |  |              | 0 | N.A. | 0 |

|                |              |   |      |   |
|----------------|--------------|---|------|---|
| RP11-271C24.2  | 0,105420048  | 0 | N.A. | 0 |
| RP11-271M24.2  |              | 0 | N.A. | 0 |
| RP11-274H2.3   | 0,2878873    | 0 | N.A. | 0 |
| RP11-274H24.1  |              | 0 | N.A. | 0 |
| RP11-274J16.5  |              | 0 | N.A. | 0 |
| RP11-275I4.1   |              | 0 | N.A. | 0 |
| RP11-275I4.2   |              | 0 | N.A. | 0 |
| RP11-276H1.3   |              | 0 | N.A. | 0 |
| RP11-276H19.1  |              | 0 | N.A. | 0 |
| RP11-276M12.1  | 0,026520097  | 0 | N.A. | 0 |
| RP11-277P12.10 |              | 0 | N.A. | 0 |
| RP11-277P12.6  |              | 0 | N.A. | 0 |
| RP11-278A23.4  |              | 0 | N.A. | 0 |
| RP11-278H7.1   |              | 0 | N.A. | 0 |
| RP11-278I4.2   | 0,095121315  | 0 | N.A. | 0 |
| RP11-281A20.2  | -0,04457274  | 0 | N.A. | 0 |
| RP11-281O15.4  |              | 0 | N.A. | 0 |
| RP11-282A11.3  | -0,084834724 | 0 | N.A. | 0 |
| RP11-282I1.1   |              | 0 | N.A. | 0 |
| RP11-282O18.3  | 0,375782278  | 0 | N.A. | 0 |
| RP11-283C24.1  | -0,01444344  | 0 | N.A. | 0 |
| RP11-283G6.5   |              | 0 | N.A. | 0 |
| RP11-283I3.2   |              | 0 | N.A. | 0 |
| RP11-284F21.8  |              | 0 | N.A. | 0 |
| RP11-284G10.1  |              | 0 | N.A. | 0 |
| RP11-284H18.1  |              | 0 | N.A. | 0 |
| RP11-284H19.1  |              | 0 | N.A. | 0 |
| RP11-285E23.2  | 0,064051713  | 0 | N.A. | 0 |
| RP11-285J16.1  |              | 0 | N.A. | 0 |
| RP11-286B14.2  |              | 0 | N.A. | 0 |
| RP11-286H15.1  |              | 0 | N.A. | 0 |
| RP11-286N3.1   |              | 0 | N.A. | 0 |
| RP11-286N3.2   |              | 0 | N.A. | 0 |

|               |  |              |      |      |
|---------------|--|--------------|------|------|
| RP11-286O18.1 |  | 0            | N.A. | 0    |
| RP11-287D1.3  |  | 0            | N.A. | 0    |
| RP11-287D1.4  |  | 0            | N.A. | 0    |
| RP11-287F9.2  |  | 0            | N.A. | 0    |
| RP11-288I21.1 |  | 0            | N.A. | 0    |
| RP11-288L9.4  |  | 0            | N.A. | 0    |
| RP11-289H16.1 |  | 0            | N.A. | 0    |
| RP11-28G8.1   |  | 0            | N.A. | 0    |
| RP11-290C10.1 |  | -0,029872433 | 0    | N.A. |
| RP11-290H9.5  |  | 0            | N.A. | 0    |
| RP11-290L1.5  |  | 0,05926896   | 0    | N.A. |
| RP11-290M5.2  |  | 0            | N.A. | 0    |
| RP11-290O12.2 |  | 0            | N.A. | 0    |
| RP11-291B21.2 |  | 0            | N.A. | 0    |
| RP11-292E2.1  |  | 0            | N.A. | 0    |
| RP11-293M10.1 |  | 0            | N.A. | 0    |
| RP11-293M10.2 |  | 0            | N.A. | 0    |
| RP11-295I5.4  |  | 0            | N.A. | 0    |
| RP11-295K2.3  |  | 0,047152119  | 0    | N.A. |
| RP11-295M18.6 |  | 0            | N.A. | 0    |
| RP11-296A18.6 |  | 0            | N.A. | 0    |
| RP11-297B17.3 |  | 0            | N.A. | 0    |
| RP11-297C4.3  |  | 0,015366641  | 0    | N.A. |
| RP11-297H3.3  |  | 0            | N.A. | 0    |
| RP11-297J22.1 |  | 0            | N.A. | 0    |
| RP11-298E2.2  |  | 0            | N.A. | 0    |
| RP11-298H24.1 |  | 0            | N.A. | 0    |
| RP11-298J23.5 |  | 0            | N.A. | 0    |
| RP11-298O21.2 |  | 0            | N.A. | 0    |
| RP11-298O21.3 |  | 0            | N.A. | 0    |
| RP11-299D14.2 |  | 0,256972614  | 0    | N.A. |
| RP11-299L17.3 |  | 0            | N.A. | 0    |
| RP11-29B2.6   |  | 0,092928954  | 0    | N.A. |

|               |  |              |      |      |   |
|---------------|--|--------------|------|------|---|
| RP11-29P20.1  |  | 0            | N.A. | 0    |   |
| RP11-2A4.4    |  | 0,047874308  | 0    | N.A. | 0 |
| RP11-2E11.5   |  | -0,111916395 | 0    | N.A. | 0 |
| RP11-2H8.2    |  | 0,113879707  | 0    | N.A. | 0 |
| RP11-2N1.2    |  |              | 0    | N.A. | 0 |
| RP11-2N1.3    |  |              | 0    | N.A. | 0 |
| RP11-300E4.2  |  | 0,342649228  | 0    | N.A. | 0 |
| RP11-300J18.2 |  |              | 0    | N.A. | 0 |
| RP11-301G19.1 |  |              | 0    | N.A. | 0 |
| RP11-301L8.2  |  |              | 0    | N.A. | 0 |
| RP11-302F12.3 |  | -0,104526445 | 0    | N.A. | 0 |
| RP11-302M6.5  |  |              | 0    | N.A. | 0 |
| RP11-303E16.3 |  | 0,177567937  | 0    | N.A. | 0 |
| RP11-303E16.6 |  | -0,1885341   | 0    | N.A. | 0 |
| RP11-304L19.2 |  | 0,181068383  | 0    | N.A. | 0 |
| RP11-304L19.4 |  |              | 0    | N.A. | 0 |
| RP11-304M2.5  |  | 0,155612844  | 0    | N.A. | 0 |
| RP11-305D15.8 |  |              | 0    | N.A. | 0 |
| RP11-305F18.1 |  | -0,29087456  | 0    | N.A. | 0 |
| RP11-305O4.3  |  |              | 0    | N.A. | 0 |
| RP11-306O13.1 |  | 0,117704282  | 0    | N.A. | 0 |
| RP11-307C18.1 |  | 0,185868719  | 0    | N.A. | 0 |
| RP11-307C19.2 |  |              | 0    | N.A. | 0 |
| RP11-307L3.4  |  |              | 0    | N.A. | 0 |
| RP11-308B5.2  |  | 0,273895799  | 0    | N.A. | 0 |
| RP11-308N19.1 |  |              | 0    | N.A. | 0 |
| RP11-309N24.1 |  |              | 0    | N.A. | 0 |
| RP11-30J20.1  |  |              | 0    | N.A. | 0 |
| RP11-30K9.5   |  |              | 0    | N.A. | 0 |
| RP11-310E22.4 |  |              | 0    | N.A. | 0 |
| RP11-310H4.1  |  |              | 0    | N.A. | 0 |
| RP11-310H4.3  |  |              | 0    | N.A. | 0 |
| RP11-310N16.1 |  | 0,267086423  | 0    | N.A. | 0 |

|               |              |   |      |   |
|---------------|--------------|---|------|---|
| RP11-310P5.1  | 0,223442761  | 0 | N.A. | 0 |
| RP11-311F12.1 |              | 0 | N.A. | 0 |
| RP11-313A24.1 |              | 0 | N.A. | 0 |
| RP11-313F23.4 | -0,051768428 | 0 | N.A. | 0 |
| RP11-313P22.1 | -0,002911468 | 0 | N.A. | 0 |
| RP11-314B1.2  | 0,224410612  | 0 | N.A. | 0 |
| RP11-315A16.1 |              | 0 | N.A. | 0 |
| RP11-315D16.2 | -0,276397522 | 0 | N.A. | 0 |
| RP11-315D16.4 | 0,081092198  | 0 | N.A. | 0 |
| RP11-315I20.3 | 0,253520133  | 0 | N.A. | 0 |
| RP11-316M1.12 | -0,092706521 | 0 | N.A. | 0 |
| RP11-316M1.3  |              | 0 | N.A. | 0 |
| RP11-316M20.1 |              | 0 | N.A. | 0 |
| RP11-316M21.6 |              | 0 | N.A. | 0 |
| RP11-317G6.1  |              | 0 | N.A. | 0 |
| RP11-317J19.1 |              | 0 | N.A. | 0 |
| RP11-317N8.3  |              | 0 | N.A. | 0 |
| RP11-318A15.8 |              | 0 | N.A. | 0 |
| RP11-318C2.1  |              | 0 | N.A. | 0 |
| RP11-318G21.4 | -0,059028607 | 0 | N.A. | 0 |
| RP11-318K12.2 | 0,21872104   | 0 | N.A. | 0 |
| RP11-319G6.3  |              | 0 | N.A. | 0 |
| RP11-311L22.3 |              | 0 | N.A. | 0 |
| RP11-320G10.1 |              | 0 | N.A. | 0 |
| RP11-320G24.1 |              | 0 | N.A. | 0 |
| RP11-320M16.2 |              | 0 | N.A. | 0 |
| RP11-320N21.1 | 0,226082094  | 0 | N.A. | 0 |
| RP11-320N21.2 | 0,213660211  | 0 | N.A. | 0 |
| RP11-320P7.2  |              | 0 | N.A. | 0 |
| RP11-321A17.4 |              | 0 | N.A. | 0 |
| RP11-321E2.4  |              | 0 | N.A. | 0 |
| RP11-321P16.1 |              | 0 | N.A. | 0 |
| RP11-322D14.2 |              | 0 | N.A. | 0 |

|               |  |              |      |      |   |
|---------------|--|--------------|------|------|---|
| RP11-322J23.1 |  | 0            | N.A. | 0    |   |
| RP11-323C15.2 |  | 0            | N.A. | 0    |   |
| RP11-323I15.5 |  | -0,007987439 | 0    | N.A. | 0 |
| RP11-323N12.5 |  | 0,326952629  | 0    | N.A. | 0 |
| RP11-324E6.6  |  |              | 0    | N.A. | 0 |
| RP11-324I22.2 |  |              | 0    | N.A. | 0 |
| RP11-324L17.1 |  | -0,111558622 | 0    | N.A. | 0 |
| RP11-325L12.6 |  |              | 0    | N.A. | 0 |
| RP11-325L12.7 |  |              | 0    | N.A. | 0 |
| RP11-325N19.3 |  |              | 0    | N.A. | 0 |
| RP11-326A19.4 |  |              | 0    | N.A. | 0 |
| RP11-326C3.13 |  |              | 0    | N.A. | 0 |
| RP11-326C3.15 |  |              | 0    | N.A. | 0 |
| RP11-326I11.4 |  | -0,149906808 | 0    | N.A. | 0 |
| RP11-326N17.2 |  |              | 0    | N.A. | 0 |
| RP11-327F22.1 |  |              | 0    | N.A. | 0 |
| RP11-327F22.2 |  | 0,070361615  | 0    | N.A. | 0 |
| RP11-327F22.4 |  |              | 0    | N.A. | 0 |
| RP11-327I22.5 |  |              | 0    | N.A. | 0 |
| RP11-327J17.9 |  |              | 0    | N.A. | 0 |
| RP11-327L3.3  |  |              | 0    | N.A. | 0 |
| RP11-328J14.1 |  | 0,093457013  | 0    | N.A. | 0 |
| RP11-328N19.1 |  | -0,002060108 | 0    | N.A. | 0 |
| RP11-329B9.1  |  |              | 0    | N.A. | 0 |
| RP11-329B9.3  |  | -0,086888337 | 0    | N.A. | 0 |
| RP11-329J18.3 |  |              | 0    | N.A. | 0 |
| RP11-329N22.1 |  |              | 0    | N.A. | 0 |
| RP11-32B5.8   |  |              | 0    | N.A. | 0 |
| RP11-330A16.1 |  |              | 0    | N.A. | 0 |
| RP11-331F9.4  |  |              | 0    | N.A. | 0 |
| RP11-332H14.1 |  | -0,09608963  | 0    | N.A. | 0 |
| RP11-332H18.5 |  |              | 0    | N.A. | 0 |
| RP11-332K15.1 |  |              | 0    | N.A. | 0 |



|               |              |   |      |   |
|---------------|--------------|---|------|---|
| RP11-333A23.4 | 0,063724129  | 0 | N.A. | 0 |
| RP11-333O1.1  |              | 0 | N.A. | 0 |
| RP11-334A14.5 |              | 0 | N.A. | 0 |
| RP11-334C17.6 |              | 0 | N.A. | 0 |
| RP11-334E6.10 |              | 0 | N.A. | 0 |
| RP11-334E6.3  |              | 0 | N.A. | 0 |
| RP11-335K5.2  |              | 0 | N.A. | 0 |
| RP11-335L23.5 |              | 0 | N.A. | 0 |
| RP11-335O4.3  | -0,050539792 | 0 | N.A. | 0 |
| RP11-336A10.2 |              | 0 | N.A. | 0 |
| RP11-336A10.4 |              | 0 | N.A. | 0 |
| RP11-336K24.5 | 0,043355161  | 0 | N.A. | 0 |
| RP11-337N6.1  |              | 0 | N.A. | 0 |
| RP11-338C15.3 | 0,281308341  | 0 | N.A. | 0 |
| RP11-338E21.3 |              | 0 | N.A. | 0 |
| RP11-338K13.1 |              | 0 | N.A. | 0 |
| RP11-338L22.2 |              | 0 | N.A. | 0 |
| RP11-338N10.1 |              | 0 | N.A. | 0 |
| RP11-33A14.1  |              | 0 | N.A. | 0 |
| RP11-33B1.3   |              | 0 | N.A. | 0 |
| RP11-33B1.4   |              | 0 | N.A. | 0 |
| RP11-33N14.3  | 0,135297074  | 0 | N.A. | 0 |
| RP11-33O4.2   | 0,064713371  | 0 | N.A. | 0 |
| RP11-340E6.1  |              | 0 | N.A. | 0 |
| RP11-340F14.6 |              | 0 | N.A. | 0 |
| RP11-340I6.8  |              | 0 | N.A. | 0 |
| RP11-342D11.2 |              | 0 | N.A. | 0 |
| RP11-342D11.3 |              | 0 | N.A. | 0 |
| RP11-342K6.3  |              | 0 | N.A. | 0 |
| RP11-342M3.5  |              | 0 | N.A. | 0 |
| RP11-343B18.2 |              | 0 | N.A. | 0 |
| RP11-343H19.1 |              | 0 | N.A. | 0 |
| RP11-343K8.3  |              | 0 | N.A. | 0 |

|               |              |   |      |   |
|---------------|--------------|---|------|---|
| RP11-344A16.2 |              | 0 | N.A. | 0 |
| RP11-344B5.2  |              | 0 | N.A. | 0 |
| RP11-344B5.3  |              | 0 | N.A. | 0 |
| RP11-344B5.4  |              | 0 | N.A. | 0 |
| RP11-344F13.1 |              | 0 | N.A. | 0 |
| RP11-344P13.4 | 0,061936771  | 0 | N.A. | 0 |
| RP11-344P13.6 |              | 0 | N.A. | 0 |
| RP11-345J4.3  | 0,342684972  | 0 | N.A. | 0 |
| RP11-346C20.4 |              | 0 | N.A. | 0 |
| RP11-346C4.3  |              | 0 | N.A. | 0 |
| RP11-346D19.1 | 0,144093466  | 0 | N.A. | 0 |
| RP11-347C12.3 | 0,18760206   | 0 | N.A. | 0 |
| RP11-347C18.5 | 0,046070765  | 0 | N.A. | 0 |
| RP11-348F1.2  |              | 0 | N.A. | 0 |
| RP11-348F1.3  |              | 0 | N.A. | 0 |
| RP11-348J12.2 |              | 0 | N.A. | 0 |
| RP11-348N5.9  | -0,11784272  | 0 | N.A. | 0 |
| RP11-349A8.3  |              | 0 | N.A. | 0 |
| RP11-34A14.3  |              | 0 | N.A. | 0 |
| RP11-34C15.2  |              | 0 | N.A. | 0 |
| RP11-34D15.2  |              | 0 | N.A. | 0 |
| RP11-34F13.2  |              | 0 | N.A. | 0 |
| RP11-350G8.9  |              | 0 | N.A. | 0 |
| RP11-350N15.3 |              | 0 | N.A. | 0 |
| RP11-350N15.4 |              | 0 | N.A. | 0 |
| RP11-350N15.6 |              | 0 | N.A. | 0 |
| RP11-351A11.1 |              | 0 | N.A. | 0 |
| RP11-351I24.1 | -0,00080375  | 0 | N.A. | 0 |
| RP11-352D13.5 |              | 0 | N.A. | 0 |
| RP11-352D13.6 | -0,247219715 | 0 | N.A. | 0 |
| RP11-352D3.2  |              | 0 | N.A. | 0 |
| RP11-353N14.3 | 0,21760698   | 0 | N.A. | 0 |
| RP11-353N14.7 | -0,133570526 | 0 | N.A. | 0 |

|               |  |              |      |      |   |
|---------------|--|--------------|------|------|---|
| RP11-353N4.5  |  | 0            | N.A. | 0    |   |
| RP11-353N4.6  |  | -0,081774836 | 0    | N.A. | 0 |
| RP11-354A14.1 |  |              | 0    | N.A. | 0 |
| RP11-354K1.1  |  |              | 0    | N.A. | 0 |
| RP11-354K4.2  |  |              | 0    | N.A. | 0 |
| RP11-354M1.2  |  |              | 0    | N.A. | 0 |
| RP11-354M20.3 |  |              | 0    | N.A. | 0 |
| RP11-354P11.2 |  |              | 0    | N.A. | 0 |
| RP11-354P11.4 |  |              | 0    | N.A. | 0 |
| RP11-354P11.8 |  |              | 0    | N.A. | 0 |
| RP11-355F16.1 |  | 0,310729108  | 0    | N.A. | 0 |
| RP11-355F22.1 |  | 0,062890705  | 0    | N.A. | 0 |
| RP11-356I2.1  |  |              | 0    | N.A. | 0 |
| RP11-356K23.1 |  |              | 0    | N.A. | 0 |
| RP11-356K23.2 |  |              | 0    | N.A. | 0 |
| RP11-356N1.2  |  | -0,28915815  | 0    | N.A. | 0 |
| RP11-356O9.1  |  |              | 0    | N.A. | 0 |
| RP11-357N13.3 |  |              | 0    | N.A. | 0 |
| RP11-358B23.5 |  |              | 0    | N.A. | 0 |
| RP11-358H9.1  |  |              | 0    | N.A. | 0 |
| RP11-359D14.2 |  |              | 0    | N.A. | 0 |
| RP11-359G22.2 |  |              | 0    | N.A. | 0 |
| RP11-359I18.5 |  | 0,062135647  | 0    | N.A. | 0 |
| RP11-359J14.2 |  |              | 0    | N.A. | 0 |
| RP11-359J6.1  |  |              | 0    | N.A. | 0 |
| RP11-359P5.1  |  | 0,219262558  | 0    | N.A. | 0 |
| RP11-35G9.5   |  | 0,042534969  | 0    | N.A. | 0 |
| RP11-35J1.2   |  | 0,361765386  | 0    | N.A. | 0 |
| RP11-360F5.3  |  |              | 0    | N.A. | 0 |
| RP11-360I2.1  |  |              | 0    | N.A. | 0 |
| RP11-360L9.8  |  |              | 0    | N.A. | 0 |
| RP11-360O19.4 |  |              | 0    | N.A. | 0 |
| RP11-361D15.2 |  |              | 0    | N.A. | 0 |

|                |              |   |      |   |
|----------------|--------------|---|------|---|
| RP11-362A1.1   |              | 0 | N.A. | 0 |
| RP11-362A9.3   |              | 0 | N.A. | 0 |
| RP11-362J17.1  |              | 0 | N.A. | 0 |
| RP11-362K14.5  | 0,154461644  | 0 | N.A. | 0 |
| RP11-362K14.7  |              | 0 | N.A. | 0 |
| RP11-362K2.2   |              | 0 | N.A. | 0 |
| RP11-363E6.4   |              | 0 | N.A. | 0 |
| RP11-363J20.2  |              | 0 | N.A. | 0 |
| RP11-363N22.2  | 0,217112093  | 0 | N.A. | 0 |
| RP11-365N19.2  | -0,02882133  | 0 | N.A. | 0 |
| RP11-365O16.6  | 0,222541272  | 0 | N.A. | 0 |
| RP11-366H4.3   | -0,000867714 | 0 | N.A. | 0 |
| RP11-366L20.2  | -0,222511887 | 0 | N.A. | 0 |
| RP11-367F23.2  |              | 0 | N.A. | 0 |
| RP11-367H1.1   | 0,398677535  | 0 | N.A. | 0 |
| RP11-367J11.2  | -0,119628571 | 0 | N.A. | 0 |
| RP11-367J7.3   |              | 0 | N.A. | 0 |
| RP11-369E15.3  |              | 0 | N.A. | 0 |
| RP11-36B15.1   |              | 0 | N.A. | 0 |
| RP11-370F5.4   |              | 0 | N.A. | 0 |
| RP11-370I10.10 |              | 0 | N.A. | 0 |
| RP11-370I10.11 | 0,121080697  | 0 | N.A. | 0 |
| RP11-370I10.6  | 0,119017588  | 0 | N.A. | 0 |
| RP11-371A19.2  |              | 0 | N.A. | 0 |
| RP11-371E8.4   |              | 0 | N.A. | 0 |
| RP11-372H2.1   |              | 0 | N.A. | 0 |
| RP11-373N22.3  | -0,184791168 | 0 | N.A. | 0 |
| RP11-374A4.1   | 0,188289691  | 0 | N.A. | 0 |
| RP11-374M1.5   | -0,102629604 | 0 | N.A. | 0 |
| RP11-375A5.1   |              | 0 | N.A. | 0 |
| RP11-375H19.2  |              | 0 | N.A. | 0 |
| RP11-375O18.2  |              | 0 | N.A. | 0 |
| RP11-377G16.2  |              | 0 | N.A. | 0 |

|                |              |   |      |   |
|----------------|--------------|---|------|---|
| RP11-378E13.4  |              | 0 | N.A. | 0 |
| RP11-378I6.1   |              | 0 | N.A. | 0 |
| RP11-379C10.1  | 0,03644643   | 0 | N.A. | 0 |
| RP11-379C10.4  | 0,315932116  | 0 | N.A. | 0 |
| RP11-379F12.3  |              | 0 | N.A. | 0 |
| RP11-379F12.4  |              | 0 | N.A. | 0 |
| RP11-379F4.6   | 0,044848866  | 0 | N.A. | 0 |
| RP11-379K17.4  |              | 0 | N.A. | 0 |
| RP11-379K22.3  | 0,262194424  | 0 | N.A. | 0 |
| RP11-37N22.1   | -0,019819473 | 0 | N.A. | 0 |
| RP11-380B4.3   | 0,278477694  | 0 | N.A. | 0 |
| RP11-380F14.2  |              | 0 | N.A. | 0 |
| RP11-380I10.4  |              | 0 | N.A. | 0 |
| RP11-380L11.4  |              | 0 | N.A. | 0 |
| RP11-380P13.1  | 0,269706999  | 0 | N.A. | 0 |
| RP11-381N20.1  | 0,020152359  | 0 | N.A. | 0 |
| RP11-381N20.2  |              | 0 | N.A. | 0 |
| RP11-381P6.1   |              | 0 | N.A. | 0 |
| RP11-382A20.4  |              | 0 | N.A. | 0 |
| RP11-382A20.5  |              | 0 | N.A. | 0 |
| RP11-382A20.7  |              | 0 | N.A. | 0 |
| RP11-383C6.2   | 0,122970203  | 0 | N.A. | 0 |
| RP11-383I23.2  |              | 0 | N.A. | 0 |
| RP11-384F7.1   | -0,235068607 | 0 | N.A. | 0 |
| RP11-384K6.8   |              | 0 | N.A. | 0 |
| RP11-384P7.7   |              | 0 | N.A. | 0 |
| RP11-386G11.8  |              | 0 | N.A. | 0 |
| RP11-386M24.10 |              | 0 | N.A. | 0 |
| RP11-386M24.9  |              | 0 | N.A. | 0 |
| RP11-387A1.5   | 0,229168662  | 0 | N.A. | 0 |
| RP11-387D10.4  | -0,03847024  | 0 | N.A. | 0 |
| RP11-387H17.4  | -0,0008111   | 0 | N.A. | 0 |
| RP11-388P9.2   |              | 0 | N.A. | 0 |

|                |  |              |      |      |   |
|----------------|--|--------------|------|------|---|
| RP11-38G5.2    |  | 0            | N.A. | 0    |   |
| RP11-38L15.3   |  | 0            | N.A. | 0    |   |
| RP11-38L15.8   |  | 0            | N.A. | 0    |   |
| RP11-390F4.10  |  | 0            | N.A. | 0    |   |
| RP11-392O1.4   |  | 0            | N.A. | 0    |   |
| RP11-392O17.1  |  | 0            | N.A. | 0    |   |
| RP11-393I23.4  |  | 0            | N.A. | 0    |   |
| RP11-393J16.4  |  | 0            | N.A. | 0    |   |
| RP11-394I13.1  |  | 0            | N.A. | 0    |   |
| RP11-394I13.3  |  | 0            | N.A. | 0    |   |
| RP11-394J1.2   |  | -0,099938085 | 0    | N.A. | 0 |
| RP11-394O2.3   |  | 0            | N.A. | 0    |   |
| RP11-394O4.3   |  | 0            | N.A. | 0    |   |
| RP11-394O4.6   |  | 0            | N.A. | 0    |   |
| RP11-395E19.6  |  | 0            | N.A. | 0    |   |
| RP11-395L14.3  |  | 0            | N.A. | 0    |   |
| RP11-397A16.1  |  | 0            | N.A. | 0    |   |
| RP11-397O8.7   |  | 0            | N.A. | 0    |   |
| RP11-398A8.5   |  | 0            | N.A. | 0    |   |
| RP11-398E10.1  |  | 0            | N.A. | 0    |   |
| RP11-398J10.2  |  | 0            | N.A. | 0    |   |
| RP11-399E6.1   |  | 0,043898844  | 0    | N.A. | 0 |
| RP11-399K21.14 |  | 0            | N.A. | 0    |   |
| RP11-39M21.1   |  | 0            | N.A. | 0    |   |
| RP11-3B7.1     |  | 0            | N.A. | 0    |   |
| RP11-3D4.4     |  | 0,21760698   | 0    | N.A. | 0 |
| RP11-3L21.2    |  | 0            | N.A. | 0    |   |
| RP11-400K9.4   |  | 0            | N.A. | 0    |   |
| RP11-400L8.2   |  | -0,082307229 | 0    | N.A. | 0 |
| RP11-400N13.1  |  | 0,042972404  | 0    | N.A. | 0 |
| RP11-401O9.3   |  | -0,07273132  | 0    | N.A. | 0 |
| RP11-401P9.1   |  | 0            | N.A. | 0    |   |
| RP11-401P9.6   |  | 0,018904876  | 0    | N.A. | 0 |

|               |  |              |      |      |
|---------------|--|--------------|------|------|
| RP11-402P6.11 |  | 0            | N.A. | 0    |
| RP11-403A21.1 |  | 0            | N.A. | 0    |
| RP11-403A3.2  |  | 0            | N.A. | 0    |
| RP11-403A3.3  |  | 0            | N.A. | 0    |
| RP11-403B2.7  |  | 0            | N.A. | 0    |
| RP11-403I13.7 |  | -0,054258389 | 0    | N.A. |
| RP11-404E16.1 |  | 0            | N.A. | 0    |
| RP11-404O13.1 |  | 0            | N.A. | 0    |
| RP11-404P21.6 |  | 0            | N.A. | 0    |
| RP11-405M12.3 |  | 0            | N.A. | 0    |
| RP11-405M12.4 |  | 0            | N.A. | 0    |
| RP11-406H21.2 |  | 0,006599937  | 0    | N.A. |
| RP11-406O23.2 |  | 0            | N.A. | 0    |
| RP11-407G23.1 |  | 0,001047933  | 0    | N.A. |
| RP11-407G23.7 |  | 0,365523305  | 0    | N.A. |
| RP11-407H12.8 |  | 0            | N.A. | 0    |
| RP11-407N17.3 |  | 0            | N.A. | 0    |
| RP11-408B11.2 |  | 0,020829773  | 0    | N.A. |
| RP11-408N14.1 |  | 0            | N.A. | 0    |
| RP11-408O19.5 |  | 0            | N.A. | 0    |
| RP11-409I10.2 |  | 0            | N.A. | 0    |
| RP11-409K20.6 |  | 0            | N.A. | 0    |
| RP11-40E6.2   |  | -0,047984723 | 0    | N.A. |
| RP11-410K21.2 |  | 0            | N.A. | 0    |
| RP11-411H5.1  |  | 0,143010787  | 0    | N.A. |
| RP11-412B14.1 |  | 0            | N.A. | 0    |
| RP11-412P11.1 |  | 0            | N.A. | 0    |
| RP11-413P11.1 |  | 0            | N.A. | 0    |
| RP11-415D17.3 |  | 0            | N.A. | 0    |
| RP11-415D17.4 |  | 0            | N.A. | 0    |
| RP11-415F23.4 |  | 0            | N.A. | 0    |
| RP11-415I12.3 |  | 0,119636986  | 0    | N.A. |
| RP11-415J8.3  |  | -0,111020608 | 0    | N.A. |

|                |              |   |      |   |
|----------------|--------------|---|------|---|
| RP11-415J8.5   | -0,012605976 | 0 | N.A. | 0 |
| RP11-417E7.2   | 0,105420048  | 0 | N.A. | 0 |
| RP11-417F21.1  |              | 0 | N.A. | 0 |
| RP11-417L19.4  | -0,065845984 | 0 | N.A. | 0 |
| RP11-418H16.1  |              | 0 | N.A. | 0 |
| RP11-419I17.1  | 0,153907623  | 0 | N.A. | 0 |
| RP11-420K14.8  |              | 0 | N.A. | 0 |
| RP11-421F16.3  | -0,023311432 | 0 | N.A. | 0 |
| RP11-422N16.3  |              | 0 | N.A. | 0 |
| RP11-423H2.4   |              | 0 | N.A. | 0 |
| RP11-424G14.1  |              | 0 | N.A. | 0 |
| RP11-424I19.2  | 0,255630337  | 0 | N.A. | 0 |
| RP11-425A23.1  |              | 0 | N.A. | 0 |
| RP11-425D17.1  |              | 0 | N.A. | 0 |
| RP11-426A6.5   |              | 0 | N.A. | 0 |
| RP11-426C22.4  | 0,088023239  | 0 | N.A. | 0 |
| RP11-426C22.6  |              | 0 | N.A. | 0 |
| RP11-426C22.8  |              | 0 | N.A. | 0 |
| RP11-426L16.10 |              | 0 | N.A. | 0 |
| RP11-427J23.1  |              | 0 | N.A. | 0 |
| RP11-428C19.4  |              | 0 | N.A. | 0 |
| RP11-428C19.5  |              | 0 | N.A. | 0 |
| RP11-428G5.5   | -0,238373313 | 0 | N.A. | 0 |
| RP11-428J1.4   |              | 0 | N.A. | 0 |
| RP11-429E11.2  |              | 0 | N.A. | 0 |
| RP11-429E11.3  |              | 0 | N.A. | 0 |
| RP11-429J17.4  |              | 0 | N.A. | 0 |
| RP11-429J17.7  | -0,255001554 | 0 | N.A. | 0 |
| RP11-429J17.8  | 0,108407135  | 0 | N.A. | 0 |
| RP11-429P3.3   |              | 0 | N.A. | 0 |
| RP11-430C1.1   | 0,175441588  | 0 | N.A. | 0 |
| RP11-430C7.4   |              | 0 | N.A. | 0 |
| RP11-431K24.3  | 0,394520592  | 0 | N.A. | 0 |



|               |  |              |      |   |
|---------------|--|--------------|------|---|
| RP11-431K24.4 |  | 0            | N.A. | 0 |
| RP11-431M7.3  |  | 0            | N.A. | 0 |
| RP11-432I5.8  |  | -0,166730128 | N.A. | 0 |
| RP11-432J24.3 |  | 0            | N.A. | 0 |
| RP11-432J9.6  |  | 0            | N.A. | 0 |
| RP11-433A10.3 |  | 0            | N.A. | 0 |
| RP11-433J20.1 |  | 0            | N.A. | 0 |
| RP11-433M22.2 |  | 0            | N.A. | 0 |
| RP11-434D11.4 |  | -0,086161026 | N.A. | 0 |
| RP11-434H14.1 |  | 0            | N.A. | 0 |
| RP11-434I12.2 |  | 0,000653148  | N.A. | 0 |
| RP11-434P11.2 |  | 0            | N.A. | 0 |
| RP11-435D7.3  |  | 0            | N.A. | 0 |
| RP11-435O5.7  |  | -0,131570781 | N.A. | 0 |
| RP11-436D23.1 |  | 0            | N.A. | 0 |
| RP11-436I24.1 |  | 0            | N.A. | 0 |
| RP11-437J19.1 |  | 0            | N.A. | 0 |
| RP11-438F14.3 |  | 0            | N.A. | 0 |
| RP11-439A17.9 |  | 0            | N.A. | 0 |
| RP11-439C15.4 |  | 0,001656132  | N.A. | 0 |
| RP11-439H8.4  |  | 0,194152528  | N.A. | 0 |
| RP11-439K3.3  |  | 0,083669845  | N.A. | 0 |
| RP11-439L18.1 |  | 0            | N.A. | 0 |
| RP11-439L18.2 |  | 0            | N.A. | 0 |
| RP11-43D2.2   |  | 0            | N.A. | 0 |
| RP11-43F13.3  |  | 0,146691391  | N.A. | 0 |
| RP11-43N5.1   |  | 0,082367129  | N.A. | 0 |
| RP11-440G9.1  |  | 0            | N.A. | 0 |
| RP11-440I14.2 |  | 0            | N.A. | 0 |
| RP11-440L14.3 |  | 0            | N.A. | 0 |
| RP11-441F2.5  |  | 0,333407989  | N.A. | 0 |
| RP11-442J21.2 |  | 0            | N.A. | 0 |
| RP11-442O1.3  |  | 0            | N.A. | 0 |

|               |              |   |      |   |
|---------------|--------------|---|------|---|
| RP11-442O1.4  | 0,01704278   | 0 | N.A. | 0 |
| RP11-443C10.1 |              | 0 | N.A. | 0 |
| RP11-444D3.1  |              | 0 | N.A. | 0 |
| RP11-444E17.6 |              | 0 | N.A. | 0 |
| RP11-445F12.1 |              | 0 | N.A. | 0 |
| RP11-445F6.2  | -0,225163244 | 0 | N.A. | 0 |
| RP11-445K13.2 |              | 0 | N.A. | 0 |
| RP11-445L6.3  |              | 0 | N.A. | 0 |
| RP11-445N18.5 | 0,071290923  | 0 | N.A. | 0 |
| RP11-445N20.3 | 0,117760074  | 0 | N.A. | 0 |
| RP11-445O16.3 |              | 0 | N.A. | 0 |
| RP11-445P17.8 |              | 0 | N.A. | 0 |
| RP11-445P19.3 |              | 0 | N.A. | 0 |
| RP11-446E24.4 |              | 0 | N.A. | 0 |
| RP11-446F17.3 |              | 0 | N.A. | 0 |
| RP11-446H18.5 |              | 0 | N.A. | 0 |
| RP11-446H18.6 |              | 0 | N.A. | 0 |
| RP11-446J8.1  |              | 0 | N.A. | 0 |
| RP11-448G15.1 |              | 0 | N.A. | 0 |
| RP11-449J1.1  |              | 0 | N.A. | 0 |
| RP11-44B19.1  |              | 0 | N.A. | 0 |
| RP11-44F21.3  | 0,064431072  | 0 | N.A. | 0 |
| RP11-44K6.3   |              | 0 | N.A. | 0 |
| RP11-44K6.4   |              | 0 | N.A. | 0 |
| RP11-44N12.2  | -0,09039104  | 0 | N.A. | 0 |
| RP11-44N12.5  |              | 0 | N.A. | 0 |
| RP11-452C13.1 | 0,03408571   | 0 | N.A. | 0 |
| RP11-452C8.1  |              | 0 | N.A. | 0 |
| RP11-452H21.1 |              | 0 | N.A. | 0 |
| RP11-452I5.2  | -0,087482772 | 0 | N.A. | 0 |
| RP11-452K12.7 | 0,419325582  | 0 | N.A. | 0 |
| RP11-452L6.8  |              | 0 | N.A. | 0 |
| RP11-454K7.3  |              | 0 | N.A. | 0 |

|                |              |   |      |   |
|----------------|--------------|---|------|---|
| RP11-455F5.6   | 0,012206386  | 0 | N.A. | 0 |
| RP11-455J20.3  | 0,223414127  | 0 | N.A. | 0 |
| RP11-455O6.8   |              | 0 | N.A. | 0 |
| RP11-455P21.3  | -0,344885361 | 0 | N.A. | 0 |
| RP11-456D7.1   |              | 0 | N.A. | 0 |
| RP11-456K23.1  |              | 0 | N.A. | 0 |
| RP11-456O19.2  |              | 0 | N.A. | 0 |
| RP11-457I16.2  |              | 0 | N.A. | 0 |
| RP11-457M11.7  |              | 0 | N.A. | 0 |
| RP11-459F6.3   |              | 0 | N.A. | 0 |
| RP11-459I19.1  | -0,006775496 | 0 | N.A. | 0 |
| RP11-45A12.1   |              | 0 | N.A. | 0 |
| RP11-45A17.4   |              | 0 | N.A. | 0 |
| RP11-45L9.1    |              | 0 | N.A. | 0 |
| RP11-45M22.3   |              | 0 | N.A. | 0 |
| RP11-460I13.2  |              | 0 | N.A. | 0 |
| RP11-461A8.5   | 0,191296245  | 0 | N.A. | 0 |
| RP11-461L13.3  | 0,089323976  | 0 | N.A. | 0 |
| RP11-461M2.2   |              | 0 | N.A. | 0 |
| RP11-461O7.1   |              | 0 | N.A. | 0 |
| RP11-462B18.2  |              | 0 | N.A. | 0 |
| RP11-462P6.1   |              | 0 | N.A. | 0 |
| RP11-463D19.1  |              | 0 | N.A. | 0 |
| RP11-463J10.3  |              | 0 | N.A. | 0 |
| RP11-463J10.4  | 0,140134487  | 0 | N.A. | 0 |
| RP11-463O12.3  | -0,091218544 | 0 | N.A. | 0 |
| RP11-463O9.9   |              | 0 | N.A. | 0 |
| RP11-464C19.3  |              | 0 | N.A. | 0 |
| RP11-464F9.22  | 0,156819904  | 0 | N.A. | 0 |
| RP11-465L10.10 |              | 0 | N.A. | 0 |
| RP11-466A19.1  | 0,067312438  | 0 | N.A. | 0 |
| RP11-466F5.10  | -0,035438338 | 0 | N.A. | 0 |
| RP11-466F5.8   | -0,007271558 | 0 | N.A. | 0 |

|                |  |              |      |      |   |
|----------------|--|--------------|------|------|---|
| RP11-466L17.1  |  | 0            | N.A. | 0    |   |
| RP11-466P24.6  |  | -0,107483555 | 0    | N.A. | 0 |
| RP11-467I17.1  |  |              | 0    | N.A. | 0 |
| RP11-467J12.4  |  | -0,010486578 | 0    | N.A. | 0 |
| RP11-467L19.16 |  |              | 0    | N.A. | 0 |
| RP11-468E2.2   |  |              | 0    | N.A. | 0 |
| RP11-469A15.2  |  | -0,059431967 | 0    | N.A. | 0 |
| RP11-469N6.1   |  |              | 0    | N.A. | 0 |
| RP11-46F15.2   |  | -0,060783053 | 0    | N.A. | 0 |
| RP11-470M17.2  |  |              | 0    | N.A. | 0 |
| RP11-472G21.2  |  |              | 0    | N.A. | 0 |
| RP11-472N13.3  |  |              | 0    | N.A. | 0 |
| RP11-472N19.3  |  |              | 0    | N.A. | 0 |
| RP11-473C18.3  |  | 0,253107376  | 0    | N.A. | 0 |
| RP11-473E2.3   |  |              | 0    | N.A. | 0 |
| RP11-473E2.4   |  |              | 0    | N.A. | 0 |
| RP11-473O4.3   |  | -0,106226008 | 0    | N.A. | 0 |
| RP11-473O4.4   |  | -0,082307229 | 0    | N.A. | 0 |
| RP11-474B12.1  |  |              | 0    | N.A. | 0 |
| RP11-474C8.8   |  |              | 0    | N.A. | 0 |
| RP11-474D1.4   |  | -0,050932012 | 0    | N.A. | 0 |
| RP11-474I16.8  |  | 0,115491748  | 0    | N.A. | 0 |
| RP11-474N24.6  |  | 0,237871634  | 0    | N.A. | 0 |
| RP11-474P2.4   |  |              | 0    | N.A. | 0 |
| RP11-475B2.1   |  |              | 0    | N.A. | 0 |
| RP11-476B1.1   |  |              | 0    | N.A. | 0 |
| RP11-478K15.6  |  |              | 0    | N.A. | 0 |
| RP11-479J7.2   |  |              | 0    | N.A. | 0 |
| RP11-47I22.1   |  |              | 0    | N.A. | 0 |
| RP11-47J17.3   |  | 0,182392106  | 0    | N.A. | 0 |
| RP11-47P18.1   |  |              | 0    | N.A. | 0 |
| RP11-47P18.2   |  | -0,054183333 | 0    | N.A. | 0 |
| RP11-480D4.6   |  |              | 0    | N.A. | 0 |

|               |  |              |      |      |   |
|---------------|--|--------------|------|------|---|
| RP11-481G8.2  |  | 0            | N.A. | 0    |   |
| RP11-481J13.1 |  | -0,067456333 | 0    | N.A. | 0 |
| RP11-482D24.3 |  |              | 0    | N.A. | 0 |
| RP11-482M8.1  |  |              | 0    | N.A. | 0 |
| RP11-483P21.2 |  |              | 0    | N.A. | 0 |
| RP11-484D2.2  |  | 0,118354217  | 0    | N.A. | 0 |
| RP11-484L8.1  |  |              | 0    | N.A. | 0 |
| RP11-484N16.1 |  | 0,097793156  | 0    | N.A. | 0 |
| RP11-484O2.1  |  |              | 0    | N.A. | 0 |
| RP11-485G7.6  |  |              | 0    | N.A. | 0 |
| RP11-486F17.1 |  | 0,215322647  | 0    | N.A. | 0 |
| RP11-486L19.2 |  |              | 0    | N.A. | 0 |
| RP11-486M23.1 |  |              | 0    | N.A. | 0 |
| RP11-486M23.2 |  |              | 0    | N.A. | 0 |
| RP11-488C13.6 |  |              | 0    | N.A. | 0 |
| RP11-489O18.1 |  |              | 0    | N.A. | 0 |
| RP11-48G14.1  |  |              | 0    | N.A. | 0 |
| RP11-48G14.3  |  | 0,249967027  | 0    | N.A. | 0 |
| RP11-490E15.2 |  |              | 0    | N.A. | 0 |
| RP11-492I21.1 |  | 0,235248939  | 0    | N.A. | 0 |
| RP11-493E12.1 |  |              | 0    | N.A. | 0 |
| RP11-493L12.5 |  |              | 0    | N.A. | 0 |
| RP11-493L12.7 |  |              | 0    | N.A. | 0 |
| RP11-493P1.2  |  |              | 0    | N.A. | 0 |
| RP11-494O16.4 |  |              | 0    | N.A. | 0 |
| RP11-495K9.3  |  |              | 0    | N.A. | 0 |
| RP11-495O10.1 |  |              | 0    | N.A. | 0 |
| RP11-495P10.3 |  | 0,252066648  | 0    | N.A. | 0 |
| RP11-495P10.6 |  |              | 0    | N.A. | 0 |
| RP11-497E19.1 |  |              | 0    | N.A. | 0 |
| RP11-497E19.2 |  |              | 0    | N.A. | 0 |
| RP11-497H17.1 |  |              | 0    | N.A. | 0 |
| RP11-497K21.1 |  |              | 0    | N.A. | 0 |

|                |  |              |   |      |   |
|----------------|--|--------------|---|------|---|
| RP11-498C9.16  |  | -0,239476269 | 0 | N.A. | 0 |
| RP11-498M15.1  |  | 0,325137988  | 0 | N.A. | 0 |
| RP11-499O7.7   |  | 0,026295128  | 0 | N.A. | 0 |
| RP11-49I4.3    |  |              | 0 | N.A. | 0 |
| RP11-49K24.8   |  |              | 0 | N.A. | 0 |
| RP11-4B16.3    |  | 0,051967137  | 0 | N.A. | 0 |
| RP11-4C20.3    |  |              | 0 | N.A. | 0 |
| RP11-4K16.2    |  |              | 0 | N.A. | 0 |
| RP11-4L24.3    |  |              | 0 | N.A. | 0 |
| RP11-4M23.3    |  |              | 0 | N.A. | 0 |
| RP11-500G10.5  |  |              | 0 | N.A. | 0 |
| RP11-500G22.5  |  | 0,22741539   | 0 | N.A. | 0 |
| RP11-500M8.7   |  | 0,258208655  | 0 | N.A. | 0 |
| RP11-501J20.5  |  |              | 0 | N.A. | 0 |
| RP11-503C24.2  |  |              | 0 | N.A. | 0 |
| RP11-503C24.4  |  | -0,03847024  | 0 | N.A. | 0 |
| RP11-503L19.1  |  |              | 0 | N.A. | 0 |
| RP11-503P10.1  |  | -0,072942913 | 0 | N.A. | 0 |
| RP11-504I13.3  |  |              | 0 | N.A. | 0 |
| RP11-504P24.9  |  | 0,35147641   | 0 | N.A. | 0 |
| RP11-505E24.2  |  |              | 0 | N.A. | 0 |
| RP11-506H21.5  |  | 0,239362366  | 0 | N.A. | 0 |
| RP11-506M12.1  |  | 0,177497689  | 0 | N.A. | 0 |
| RP11-507B12.2  |  |              | 0 | N.A. | 0 |
| RP11-507K2.2   |  | 0,070218576  | 0 | N.A. | 0 |
| RP11-507K2.3   |  | -0,017118869 | 0 | N.A. | 0 |
| RP11-508N12.2  |  | -0,047107715 | 0 | N.A. | 0 |
| RP11-508N22.12 |  | 0,091697578  | 0 | N.A. | 0 |
| RP11-508N22.13 |  | 0,014959771  | 0 | N.A. | 0 |
| RP11-508N22.9  |  |              | 0 | N.A. | 0 |
| RP11-50B3.4    |  | 0,140822044  | 0 | N.A. | 0 |
| RP11-50D16.4   |  |              | 0 | N.A. | 0 |
| RP11-50D9.3    |  | -0,054793905 | 0 | N.A. | 0 |

|                  |  |              |      |      |   |
|------------------|--|--------------|------|------|---|
| RP11-510M2.2     |  | 0            | N.A. | 0    |   |
| RP11-510M2.6     |  | -0,211213254 | 0    | N.A. | 0 |
| RP11-513D5.2     |  | -0,112269064 | 0    | N.A. | 0 |
| RP11-513D5.5     |  |              | 0    | N.A. | 0 |
| RP11-513G11.4    |  | 0,034357583  | 0    | N.A. | 0 |
| RP11-513G19.1    |  |              | 0    | N.A. | 0 |
| RP11-513H8.1     |  |              | 0    | N.A. | 0 |
| RP11-513M1.1     |  |              | 0    | N.A. | 0 |
| RP11-513N24.1    |  |              | 0    | N.A. | 0 |
| RP11-513O17.2    |  | 0,189648562  | 0    | N.A. | 0 |
| RP11-514D23.3    |  |              | 0    | N.A. | 0 |
| RP11-515O17.3    |  |              | 0    | N.A. | 0 |
| RP11-516C1.1     |  | 0,146193425  | 0    | N.A. | 0 |
| RP11-517A5.5     |  |              | 0    | N.A. | 0 |
| RP11-517A5.7     |  |              | 0    | N.A. | 0 |
| RP11-517C16.2    |  |              | 0    | N.A. | 0 |
| RP11-517C16.4    |  |              | 0    | N.A. | 0 |
| RP11-517I3.1     |  | -0,021734083 | 0    | N.A. | 0 |
| RP11-517O13.3    |  |              | 0    | N.A. | 0 |
| RP11-51J9.4      |  |              | 0    | N.A. | 0 |
| RP11-520A21.1    |  | 0,082359308  | 0    | N.A. | 0 |
| RP11-521B24.5    |  |              | 0    | N.A. | 0 |
| RP11-521C20.5    |  | 0,184091022  | 0    | N.A. | 0 |
| RP11-521D12.1    |  |              | 0    | N.A. | 0 |
| RP11-521D12.5    |  |              | 0    | N.A. | 0 |
| RP11-521O16.1    |  |              | 0    | N.A. | 0 |
| RP11-521O16.2    |  |              | 0    | N.A. | 0 |
| RP11-523H20.3    |  | 0,233204855  | 0    | N.A. | 0 |
| RP11-523H24.3    |  | 0,153076372  | 0    | N.A. | 0 |
| RP11-524D16--A.3 |  | 0,399090323  | 0    | N.A. | 0 |
| RP11-524N5.1     |  |              | 0    | N.A. | 0 |
| RP11-525G13.2    |  | -0,103598713 | 0    | N.A. | 0 |
| RP11-527F13.1    |  |              | 0    | N.A. | 0 |

|               |              |   |      |   |
|---------------|--------------|---|------|---|
| RP11-527N22.2 | 0,228744416  | 0 | N.A. | 0 |
| RP11-528G1.2  | 0,160213458  | 0 | N.A. | 0 |
| RP11-529E10.7 |              | 0 | N.A. | 0 |
| RP11-529E15.1 |              | 0 | N.A. | 0 |
| RP11-529G21.2 |              | 0 | N.A. | 0 |
| RP11-529K1.4  |              | 0 | N.A. | 0 |
| RP11-530C5.1  |              | 0 | N.A. | 0 |
| RP11-530C5.2  |              | 0 | N.A. | 0 |
| RP11-530N7.3  |              | 0 | N.A. | 0 |
| RP11-531H8.2  |              | 0 | N.A. | 0 |
| RP11-532E4.2  | 0,201200549  | 0 | N.A. | 0 |
| RP11-532F6.4  | -0,081060161 | 0 | N.A. | 0 |
| RP11-532N4.2  |              | 0 | N.A. | 0 |
| RP11-535M15.1 | 0,242866184  | 0 | N.A. | 0 |
| RP11-536C5.2  | -0,025234084 | 0 | N.A. | 0 |
| RP11-536I6.2  |              | 0 | N.A. | 0 |
| RP11-536K7.5  |              | 0 | N.A. | 0 |
| RP11-536O18.1 |              | 0 | N.A. | 0 |
| RP11-537A6.9  |              | 0 | N.A. | 0 |
| RP11-537H15.3 |              | 0 | N.A. | 0 |
| RP11-538D16.2 |              | 0 | N.A. | 0 |
| RP11-538I12.3 |              | 0 | N.A. | 0 |
| RP11-539E17.5 |              | 0 | N.A. | 0 |
| RP11-53B2.4   |              | 0 | N.A. | 0 |
| RP11-53B5.1   |              | 0 | N.A. | 0 |
| RP11-540O11.1 | -0,022286942 | 0 | N.A. | 0 |
| RP11-541P9.3  | -0,223041116 | 0 | N.A. | 0 |
| RP11-542A14.1 |              | 0 | N.A. | 0 |
| RP11-542A14.2 |              | 0 | N.A. | 0 |
| RP11-542B15.1 |              | 0 | N.A. | 0 |
| RP11-542C16.1 |              | 0 | N.A. | 0 |
| RP11-542C16.2 |              | 0 | N.A. | 0 |
| RP11-542G1.1  | 0,252359688  | 0 | N.A. | 0 |



|                 |              |   |      |   |
|-----------------|--------------|---|------|---|
| RP11-542K23.7   | -0,045506036 | 0 | N.A. | 0 |
| RP11-542M13.2   |              | 0 | N.A. | 0 |
| RP11-542M13.3   |              | 0 | N.A. | 0 |
| RP11-543C4.1    | 0,021255301  | 0 | N.A. | 0 |
| RP11-543D10.2   |              | 0 | N.A. | 0 |
| RP11-543D5.1    | -0,267728939 | 0 | N.A. | 0 |
| RP11-544D21.2   |              | 0 | N.A. | 0 |
| RP11-544L8--B.4 |              | 0 | N.A. | 0 |
| RP11-544M22.8   |              | 0 | N.A. | 0 |
| RP11-545J16.1   | 0,196712056  | 0 | N.A. | 0 |
| RP11-545N8.3    | 0,094912245  | 0 | N.A. | 0 |
| RP11-545P7.4    | 0,303217865  | 0 | N.A. | 0 |
| RP11-546B15.1   | -0,114832045 | 0 | N.A. | 0 |
| RP11-546M21.6   | -0,068586    | 0 | N.A. | 0 |
| RP11-546O6.4    | -0,111916395 | 0 | N.A. | 0 |
| RP11-547D23.1   |              | 0 | N.A. | 0 |
| RP11-548P2.2    |              | 0 | N.A. | 0 |
| RP11-549L6.3    |              | 0 | N.A. | 0 |
| RP11-54A9.1     |              | 0 | N.A. | 0 |
| RP11-54O15.3    |              | 0 | N.A. | 0 |
| RP11-54O7.11    |              | 0 | N.A. | 0 |
| RP11-54O7.16    |              | 0 | N.A. | 0 |
| RP11-54O7.18    | 0,129694057  | 0 | N.A. | 0 |
| RP11-54O7.2     |              | 0 | N.A. | 0 |
| RP11-54O7.3     |              | 0 | N.A. | 0 |
| RP11-550P17.5   |              | 0 | N.A. | 0 |
| RP11-552D4.1    |              | 0 | N.A. | 0 |
| RP11-552F3.10   |              | 0 | N.A. | 0 |
| RP11-552F3.12   |              | 0 | N.A. | 0 |
| RP11-552F3.13   |              | 0 | N.A. | 0 |
| RP11-553A10.1   | -0,021674945 | 0 | N.A. | 0 |
| RP11-553K8.2    |              | 0 | N.A. | 0 |
| RP11-553K8.5    |              | 0 | N.A. | 0 |

|               |              |   |      |   |
|---------------|--------------|---|------|---|
| RP11-553L6.2  |              | 0 | N.A. | 0 |
| RP11-553P9.2  | 0,015297525  | 0 | N.A. | 0 |
| RP11-554A11.7 |              | 0 | N.A. | 0 |
| RP11-554A11.9 | -0,01079708  | 0 | N.A. | 0 |
| RP11-554D13.1 |              | 0 | N.A. | 0 |
| RP11-554D14.8 |              | 0 | N.A. | 0 |
| RP11-554D15.1 |              | 0 | N.A. | 0 |
| RP11-554D15.3 | 0,042126362  | 0 | N.A. | 0 |
| RP11-554E23.2 |              | 0 | N.A. | 0 |
| RP11-554F20.1 |              | 0 | N.A. | 0 |
| RP11-554I8.1  |              | 0 | N.A. | 0 |
| RP11-554I8.2  | 0,081232597  | 0 | N.A. | 0 |
| RP11-556I14.1 |              | 0 | N.A. | 0 |
| RP11-556O15.1 | 0,200508491  | 0 | N.A. | 0 |
| RP11-557H15.4 |              | 0 | N.A. | 0 |
| RP11-557L19.1 |              | 0 | N.A. | 0 |
| RP11-560I19.1 | -0,047696839 | 0 | N.A. | 0 |
| RP11-561O23.5 |              | 0 | N.A. | 0 |
| RP11-561O23.8 |              | 0 | N.A. | 0 |
| RP11-561P12.5 |              | 0 | N.A. | 0 |
| RP11-562A8.4  | -0,072506321 | 0 | N.A. | 0 |
| RP11-563D10.1 |              | 0 | N.A. | 0 |
| RP11-563N12.2 |              | 0 | N.A. | 0 |
| RP11-563P16.1 |              | 0 | N.A. | 0 |
| RP11-565N2.2  |              | 0 | N.A. | 0 |
| RP11-566K11.4 |              | 0 | N.A. | 0 |
| RP11-567G11.1 | 0,313378805  | 0 | N.A. | 0 |
| RP11-567I13.1 |              | 0 | N.A. | 0 |
| RP11-567J20.2 |              | 0 | N.A. | 0 |
| RP11-567J20.3 |              | 0 | N.A. | 0 |
| RP11-567M16.2 |              | 0 | N.A. | 0 |
| RP11-569A11.1 | 0,017447498  | 0 | N.A. | 0 |
| RP11-56B16.4  |              | 0 | N.A. | 0 |

|                |              |   |      |   |
|----------------|--------------|---|------|---|
| RP11-56B16.5   | -0,085469688 | 0 | N.A. | 0 |
| RP11-56G10.2   |              | 0 | N.A. | 0 |
| RP11-56N19.5   |              | 0 | N.A. | 0 |
| RP11-571E6.3   |              | 0 | N.A. | 0 |
| RP11-571I18.5  | 0,116204999  | 0 | N.A. | 0 |
| RP11-571M6.15  |              | 0 | N.A. | 0 |
| RP11-571M6.7   | 0,156388106  | 0 | N.A. | 0 |
| RP11-572C15.5  |              | 0 | N.A. | 0 |
| RP11-572C21.1  |              | 0 | N.A. | 0 |
| RP11-572M11.3  |              | 0 | N.A. | 0 |
| RP11-572M11.4  | -0,003416197 | 0 | N.A. | 0 |
| RP11-572O6.1   | 0,145422675  | 0 | N.A. | 0 |
| RP11-573G6.6   |              | 0 | N.A. | 0 |
| RP11-573G6.8   |              | 0 | N.A. | 0 |
| RP11-573G6.9   |              | 0 | N.A. | 0 |
| RP11-574F21.3  | 0,119861328  | 0 | N.A. | 0 |
| RP11-574H6.1   |              | 0 | N.A. | 0 |
| RP11-574K11.31 |              | 0 | N.A. | 0 |
| RP11-574K11.5  |              | 0 | N.A. | 0 |
| RP11-574O7.1   |              | 0 | N.A. | 0 |
| RP11-575L7.4   |              | 0 | N.A. | 0 |
| RP11-576D8.4   |              | 0 | N.A. | 0 |
| RP11-576I22.2  | -0,016228904 | 0 | N.A. | 0 |
| RP11-578F21.6  |              | 0 | N.A. | 0 |
| RP11-579D7.2   |              | 0 | N.A. | 0 |
| RP11-57C13.3   | -0,006340534 | 0 | N.A. | 0 |
| RP11-582J16.3  | 0,105962394  | 0 | N.A. | 0 |
| RP11-583F2.2   | 0,13570527   | 0 | N.A. | 0 |
| RP11-586D19.1  | -0,000626971 | 0 | N.A. | 0 |
| RP11-586D19.2  |              | 0 | N.A. | 0 |
| RP11-586K2.1   |              | 0 | N.A. | 0 |
| RP11-587P21.2  | 0,025295251  | 0 | N.A. | 0 |
| RP11-589B3.6   | 0,044112527  | 0 | N.A. | 0 |

|                |  |              |      |      |   |
|----------------|--|--------------|------|------|---|
| RP11-589C21.5  |  | 0            | N.A. | 0    |   |
| RP11-589M4.1   |  | 0            | N.A. | 0    |   |
| RP11-58K22.5   |  | 0            | N.A. | 0    |   |
| RP11-593F23.1  |  | 0            | N.A. | 0    |   |
| RP11-594N15.2  |  | 0            | N.A. | 0    |   |
| RP11-597D13.8  |  | -0,087091051 | 0    | N.A. | 0 |
| RP11-597M12.2  |  |              | 0    | N.A. | 0 |
| RP11-598F7.4   |  | 0,085710832  | 0    | N.A. | 0 |
| RP11-598F7.5   |  |              | 0    | N.A. | 0 |
| RP11-599B13.3  |  | 0,220915941  | 0    | N.A. | 0 |
| RP11-59N23.1   |  |              | 0    | N.A. | 0 |
| RP11-600L4.1   |  | 0,014501726  | 0    | N.A. | 0 |
| RP11-603J24.14 |  | 0,083333248  | 0    | N.A. | 0 |
| RP11-603J24.4  |  |              | 0    | N.A. | 0 |
| RP11-603J24.5  |  | 0,216279624  | 0    | N.A. | 0 |
| RP11-60I3.4    |  |              | 0    | N.A. | 0 |
| RP11-611O2.5   |  | -0,238862676 | 0    | N.A. | 0 |
| RP11-613C6.2   |  |              | 0    | N.A. | 0 |
| RP11-613D13.8  |  | 0,107473348  | 0    | N.A. | 0 |
| RP11-613M10.6  |  |              | 0    | N.A. | 0 |
| RP11-613M10.8  |  |              | 0    | N.A. | 0 |
| RP11-613M10.9  |  | -0,265781989 | 0    | N.A. | 0 |
| RP11-614F17.2  |  |              | 0    | N.A. | 0 |
| RP11-615I2.1   |  |              | 0    | N.A. | 0 |
| RP11-616M22.11 |  |              | 0    | N.A. | 0 |
| RP11-616M22.12 |  |              | 0    | N.A. | 0 |
| RP11-616M22.3  |  |              | 0    | N.A. | 0 |
| RP11-618K13.2  |  |              | 0    | N.A. | 0 |
| RP11-618L22.1  |  | -0,039671105 | 0    | N.A. | 0 |
| RP11-619A14.3  |  |              | 0    | N.A. | 0 |
| RP11-619L19.2  |  |              | 0    | N.A. | 0 |
| RP11-61E11.2   |  |              | 0    | N.A. | 0 |
| RP11-61F12.1   |  |              | 0    | N.A. | 0 |

|               |  |              |      |      |   |
|---------------|--|--------------|------|------|---|
| RP11-61G19.1  |  | 0            | N.A. | 0    |   |
| RP11-61I13.3  |  | 0            | N.A. | 0    |   |
| RP11-61J19.3  |  | 0            | N.A. | 0    |   |
| RP11-61K9.2   |  | 0            | N.A. | 0    |   |
| RP11-61O1.2   |  | 0            | N.A. | 0    |   |
| RP11-621L6.3  |  | 0            | N.A. | 0    |   |
| RP11-622A1.2  |  | 0            | N.A. | 0    |   |
| RP11-624C23.1 |  | 0,086912565  | 0    | N.A. | 0 |
| RP11-624D11.2 |  | 0            | N.A. | 0    |   |
| RP11-624J12.1 |  | -0,067456333 | 0    | N.A. | 0 |
| RP11-624L4.2  |  | -0,086157723 | 0    | N.A. | 0 |
| RP11-624M8.1  |  | 0            | N.A. | 0    |   |
| RP11-625L16.1 |  | 0            | N.A. | 0    |   |
| RP11-625L16.3 |  | 0            | N.A. | 0    |   |
| RP11-626G11.4 |  | 0            | N.A. | 0    |   |
| RP11-626H12.1 |  | 0,202715135  | 0    | N.A. | 0 |
| RP11-626H12.3 |  | 0            | N.A. | 0    |   |
| RP11-626I20.3 |  | 0            | N.A. | 0    |   |
| RP11-627G18.1 |  | 0            | N.A. | 0    |   |
| RP11-629G13.1 |  | 0,260618853  | 0    | N.A. | 0 |
| RP11-629N8.3  |  | 0,232150643  | 0    | N.A. | 0 |
| RP11-62C7.2   |  | 0            | N.A. | 0    |   |
| RP11-62F24.1  |  | 0            | N.A. | 0    |   |
| RP11-62F24.2  |  | 0,021619     | 0    | N.A. | 0 |
| RP11-62H20.1  |  | 0            | N.A. | 0    |   |
| RP11-62I21.1  |  | 0            | N.A. | 0    |   |
| RP11-62J1.4   |  | 0,025924663  | 0    | N.A. | 0 |
| RP11-632K5.3  |  | 0            | N.A. | 0    |   |
| RP11-632L2.2  |  | 0            | N.A. | 0    |   |
| RP11-634B7.4  |  | 0            | N.A. | 0    |   |
| RP11-635L1.3  |  | 0            | N.A. | 0    |   |
| RP11-638I2.4  |  | 0            | N.A. | 0    |   |
| RP11-638I2.6  |  | 0,04890826   | 0    | N.A. | 0 |

|               |              |   |      |   |
|---------------|--------------|---|------|---|
| RP11-63A1.1   |              | 0 | N.A. | 0 |
| RP11-63A2.2   |              | 0 | N.A. | 0 |
| RP11-63B13.1  |              | 0 | N.A. | 0 |
| RP11-63G10.3  |              | 0 | N.A. | 0 |
| RP11-63N8.3   |              | 0 | N.A. | 0 |
| RP11-640I15.1 |              | 0 | N.A. | 0 |
| RP11-640L9.1  | 0,092101135  | 0 | N.A. | 0 |
| RP11-643C9.2  |              | 0 | N.A. | 0 |
| RP11-644C3.1  | 0,208223365  | 0 | N.A. | 0 |
| RP11-644F5.10 |              | 0 | N.A. | 0 |
| RP11-644K8.1  | 0,043640545  | 0 | N.A. | 0 |
| RP11-646E18.4 | -0,004177906 | 0 | N.A. | 0 |
| RP11-647K16.1 | -0,177462839 | 0 | N.A. | 0 |
| RP11-647P12.1 |              | 0 | N.A. | 0 |
| RP11-649E7.5  |              | 0 | N.A. | 0 |
| RP11-64B16.3  |              | 0 | N.A. | 0 |
| RP11-64C1.1   |              | 0 | N.A. | 0 |
| RP11-64D22.5  | 0,099417652  | 0 | N.A. | 0 |
| RP11-64D24.4  |              | 0 | N.A. | 0 |
| RP11-64P14.7  |              | 0 | N.A. | 0 |
| RP11-650L12.1 | 0,182120548  | 0 | N.A. | 0 |
| RP11-650L12.2 |              | 0 | N.A. | 0 |
| RP11-651P23.5 | 0,360693745  | 0 | N.A. | 0 |
| RP11-654D12.3 | 0,195904803  | 0 | N.A. | 0 |
| RP11-655C2.3  |              | 0 | N.A. | 0 |
| RP11-656D10.5 |              | 0 | N.A. | 0 |
| RP11-656D10.6 |              | 0 | N.A. | 0 |
| RP11-656E20.5 |              | 0 | N.A. | 0 |
| RP11-65B7.2   |              | 0 | N.A. | 0 |
| RP11-65D17.1  |              | 0 | N.A. | 0 |
| RP11-65D24.2  |              | 0 | N.A. | 0 |
| RP11-65G9.1   | 0,01262946   | 0 | N.A. | 0 |
| RP11-65J21.1  | 0,129379736  | 0 | N.A. | 0 |

|                |  |              |      |      |
|----------------|--|--------------|------|------|
| RP11-65J21.4   |  | 0            | N.A. | 0    |
| RP11-65J3.2    |  | 0            | N.A. | 0    |
| RP11-65J3.3    |  | 0            | N.A. | 0    |
| RP11-65L19.4   |  | 0            | N.A. | 0    |
| RP11-65M17.3   |  | 0            | N.A. | 0    |
| RP11-660M5.1   |  | 0            | N.A. | 0    |
| RP11-661A12.12 |  | -5,82055E-05 | 0    | N.A. |
| RP11-661A12.4  |  | -0,072224274 | 0    | N.A. |
| RP11-661A12.9  |  | 0,095441582  | 0    | N.A. |
| RP11-661C8.3   |  | 0            | N.A. | 0    |
| RP11-662G23.1  |  | 0            | N.A. | 0    |
| RP11-662I13.2  |  | 0            | N.A. | 0    |
| RP11-662J14.2  |  | 0            | N.A. | 0    |
| RP11-663P9.1   |  | 0            | N.A. | 0    |
| RP11-665C16.5  |  | 0            | N.A. | 0    |
| RP11-665C16.6  |  | 0,13694583   | 0    | N.A. |
| RP11-665G4.1   |  | 0            | N.A. | 0    |
| RP11-665J16.1  |  | 0            | N.A. | 0    |
| RP11-666A8.8   |  | -0,074771848 | 0    | N.A. |
| RP11-667K14.4  |  | 0,304138734  | 0    | N.A. |
| RP11-667K14.5  |  | 0            | N.A. | 0    |
| RP11-669M16.1  |  | 0            | N.A. | 0    |
| RP11-66B24.1   |  | 0            | N.A. | 0    |
| RP11-66B24.9   |  | 0            | N.A. | 0    |
| RP11-66N24.7   |  | 0            | N.A. | 0    |
| RP11-672A2.5   |  | 0            | N.A. | 0    |
| RP11-672A2.6   |  | 0            | N.A. | 0    |
| RP11-673E1.1   |  | 0            | N.A. | 0    |
| RP11-673P17.4  |  | 0            | N.A. | 0    |
| RP11-674P19.2  |  | 0            | N.A. | 0    |
| RP11-675F6.3   |  | 0            | N.A. | 0    |
| RP11-676J12.6  |  | 0,063444968  | 0    | N.A. |
| RP11-676J12.7  |  | 0            | N.A. | 0    |

|               |  |              |      |   |
|---------------|--|--------------|------|---|
| RP11-676J15.1 |  | 0            | N.A. | 0 |
| RP11-677I18.3 |  | 0            | N.A. | 0 |
| RP11-678G14.2 |  | -0,312107551 | N.A. | 0 |
| RP11-678G14.3 |  | 0            | N.A. | 0 |
| RP11-678G14.4 |  | 0            | N.A. | 0 |
| RP11-679B17.2 |  | 0            | N.A. | 0 |
| RP11-679B19.1 |  | 0            | N.A. | 0 |
| RP11-679B19.2 |  | 0            | N.A. | 0 |
| RP11-679C8.2  |  | 0            | N.A. | 0 |
| RP11-67H24.2  |  | 0            | N.A. | 0 |
| RP11-67L3.5   |  | -0,007771366 | N.A. | 0 |
| RP11-680C21.1 |  | 0            | N.A. | 0 |
| RP11-680F20.6 |  | 0            | N.A. | 0 |
| RP11-680F20.9 |  | 0            | N.A. | 0 |
| RP11-680G24.6 |  | 0,110328733  | N.A. | 0 |
| RP11-684B21.1 |  | 0            | N.A. | 0 |
| RP11-685M7.3  |  | -0,210071283 | N.A. | 0 |
| RP11-685N10.1 |  | 0            | N.A. | 0 |
| RP11-686D22.4 |  | 0            | N.A. | 0 |
| RP11-686D22.5 |  | 0            | N.A. | 0 |
| RP11-686F15.2 |  | 0            | N.A. | 0 |
| RP11-686G8.5  |  | 0            | N.A. | 0 |
| RP11-686O6.1  |  | -0,118104084 | N.A. | 0 |
| RP11-687F6.5  |  | 0            | N.A. | 0 |
| RP11-688I9.4  |  | 0            | N.A. | 0 |
| RP11-689B22.2 |  | 0            | N.A. | 0 |
| RP11-68I3.5   |  | 0            | N.A. | 0 |
| RP11-68I3.7   |  | 0            | N.A. | 0 |
| RP11-690P14.4 |  | 0            | N.A. | 0 |
| RP11-693J15.5 |  | 0            | N.A. | 0 |
| RP11-693J15.6 |  | 0            | N.A. | 0 |
| RP11-693L9.2  |  | 0            | N.A. | 0 |
| RP11-697E2.11 |  | 0            | N.A. | 0 |



|               |  |              |      |      |   |
|---------------|--|--------------|------|------|---|
| RP11-697E22.1 |  | 0            | N.A. | 0    |   |
| RP11-697E22.2 |  | -0,133299686 | 0    | N.A. | 0 |
| RP11-697H9.3  |  |              | 0    | N.A. | 0 |
| RP11-698F20.3 |  |              | 0    | N.A. | 0 |
| RP11-699L21.1 |  | 0,301406611  | 0    | N.A. | 0 |
| RP11-69C13.1  |  | 0,086580496  | 0    | N.A. | 0 |
| RP11-69G7.1   |  |              | 0    | N.A. | 0 |
| RP11-69I8.2   |  | 0,107929843  | 0    | N.A. | 0 |
| RP11-69L16.4  |  |              | 0    | N.A. | 0 |
| RP11-6D1.3    |  | 0,064361634  | 0    | N.A. | 0 |
| RP11-6L6.7    |  |              | 0    | N.A. | 0 |
| RP11-6N17.2   |  | 0,29175436   | 0    | N.A. | 0 |
| RP11-6O2.2    |  | 0,09102857   | 0    | N.A. | 0 |
| RP11-6O2.3    |  |              | 0    | N.A. | 0 |
| RP11-6O2.4    |  |              | 0    | N.A. | 0 |
| RP11-700J17.1 |  |              | 0    | N.A. | 0 |
| RP11-701P16.2 |  |              | 0    | N.A. | 0 |
| RP11-702F3.1  |  |              | 0    | N.A. | 0 |
| RP11-702F3.3  |  |              | 0    | N.A. | 0 |
| RP11-702F3.4  |  | -0,016863589 | 0    | N.A. | 0 |
| RP11-702H23.4 |  |              | 0    | N.A. | 0 |
| RP11-702H23.6 |  |              | 0    | N.A. | 0 |
| RP11-703G6.1  |  | 0,268551018  | 0    | N.A. | 0 |
| RP11-703I16.1 |  |              | 0    | N.A. | 0 |
| RP11-703M24.5 |  | -0,075276129 | 0    | N.A. | 0 |
| RP11-704M14.1 |  |              | 0    | N.A. | 0 |
| RP11-705C15.4 |  |              | 0    | N.A. | 0 |
| RP11-705O24.1 |  |              | 0    | N.A. | 0 |
| RP11-706C16.8 |  |              | 0    | N.A. | 0 |
| RP11-706D8.3  |  |              | 0    | N.A. | 0 |
| RP11-707P17.2 |  | 0,174649506  | 0    | N.A. | 0 |
| RP11-709D24.5 |  |              | 0    | N.A. | 0 |
| RP11-70D24.2  |  |              | 0    | N.A. | 0 |

|               |              |   |      |   |
|---------------|--------------|---|------|---|
| RP11-70D24.3  |              | 0 | N.A. | 0 |
| RP11-70F11.8  | 0,053561122  | 0 | N.A. | 0 |
| RP11-70L8.4   |              | 0 | N.A. | 0 |
| RP11-710C12.1 |              | 0 | N.A. | 0 |
| RP11-710E1.2  |              | 0 | N.A. | 0 |
| RP11-712L6.7  | -0,082307229 | 0 | N.A. | 0 |
| RP11-713D19.1 |              | 0 | N.A. | 0 |
| RP11-713N11.5 |              | 0 | N.A. | 0 |
| RP11-713P17.4 |              | 0 | N.A. | 0 |
| RP11-714L20.1 | 0,260618853  | 0 | N.A. | 0 |
| RP11-715J22.3 | -0,011199851 | 0 | N.A. | 0 |
| RP11-715J22.4 |              | 0 | N.A. | 0 |
| RP11-718O11.1 |              | 0 | N.A. | 0 |
| RP11-71E19.1  |              | 0 | N.A. | 0 |
| RP11-71G12.1  |              | 0 | N.A. | 0 |
| RP11-71N10.1  |              | 0 | N.A. | 0 |
| RP11-720L2.4  |              | 0 | N.A. | 0 |
| RP11-723D22.3 | -0,115044285 | 0 | N.A. | 0 |
| RP11-723O4.6  | 0,222388481  | 0 | N.A. | 0 |
| RP11-724N1.1  |              | 0 | N.A. | 0 |
| RP11-728F11.4 | 0,08690519   | 0 | N.A. | 0 |
| RP11-728K20.3 | 0,060385538  | 0 | N.A. | 0 |
| RP11-729L2.2  |              | 0 | N.A. | 0 |
| RP11-72L22.1  |              | 0 | N.A. | 0 |
| RP11-731D1.4  | 0,243666365  | 0 | N.A. | 0 |
| RP11-731F5.2  | -0,225163244 | 0 | N.A. | 0 |
| RP11-731K22.1 | -0,081774836 | 0 | N.A. | 0 |
| RP11-732A19.5 |              | 0 | N.A. | 0 |
| RP11-732A19.8 | 0,036877935  | 0 | N.A. | 0 |
| RP11-732A19.9 |              | 0 | N.A. | 0 |
| RP11-732A21.2 |              | 0 | N.A. | 0 |
| RP11-733O18.1 |              | 0 | N.A. | 0 |
| RP11-734K21.3 | -0,091972288 | 0 | N.A. | 0 |

|                |  |              |      |      |   |
|----------------|--|--------------|------|------|---|
| RP11-734K23.9  |  | 0            | N.A. | 0    |   |
| RP11-735G4.1   |  | 0            | N.A. | 0    |   |
| RP11-736N17.10 |  | 0            | N.A. | 0    |   |
| RP11-737O24.2  |  | 0            | N.A. | 0    |   |
| RP11-737O24.5  |  | 0            | N.A. | 0    |   |
| RP11-739N20.2  |  | -0,054302529 | 0    | N.A. | 0 |
| RP11-73G16.2   |  | 0,237871634  | 0    | N.A. | 0 |
| RP11-73M14.1   |  |              | 0    | N.A. | 0 |
| RP11-73M7.6    |  | 0,346986164  | 0    | N.A. | 0 |
| RP11-73M7.9    |  | -0,099739463 | 0    | N.A. | 0 |
| RP11-73O6.3    |  |              | 0    | N.A. | 0 |
| RP11-742B18.1  |  |              | 0    | N.A. | 0 |
| RP11-744J10.3  |  |              | 0    | N.A. | 0 |
| RP11-745C15.2  |  | 0,044112527  | 0    | N.A. | 0 |
| RP11-745O10.4  |  |              | 0    | N.A. | 0 |
| RP11-746M1.1   |  |              | 0    | N.A. | 0 |
| RP11-74E22.5   |  |              | 0    | N.A. | 0 |
| RP11-74M11.2   |  |              | 0    | N.A. | 0 |
| RP11-750H9.5   |  | 0,005824376  | 0    | N.A. | 0 |
| RP11-752D24.3  |  |              | 0    | N.A. | 0 |
| RP11-752L20.5  |  |              | 0    | N.A. | 0 |
| RP11-753D20.3  |  |              | 0    | N.A. | 0 |
| RP11-753H16.3  |  |              | 0    | N.A. | 0 |
| RP11-753H16.5  |  |              | 0    | N.A. | 0 |
| RP11-754B17.1  |  |              | 0    | N.A. | 0 |
| RP11-755B10.2  |  | 0,044112527  | 0    | N.A. | 0 |
| RP11-755F10.3  |  |              | 0    | N.A. | 0 |
| RP11-755O11.2  |  |              | 0    | N.A. | 0 |
| RP11-756G20.1  |  |              | 0    | N.A. | 0 |
| RP11-756P10.2  |  |              | 0    | N.A. | 0 |
| RP11-757A13.1  |  | 0,021619     | 0    | N.A. | 0 |
| RP11-757G1.6   |  |              | 0    | N.A. | 0 |
| RP11-758M4.4   |  | 0,033111108  | 0    | N.A. | 0 |

|               |              |   |      |   |
|---------------|--------------|---|------|---|
| RP11-758P17.2 | 0,057650746  | 0 | N.A. | 0 |
| RP11-75C10.9  |              | 0 | N.A. | 0 |
| RP11-75L1.1   |              | 0 | N.A. | 0 |
| RP11-761I4.5  |              | 0 | N.A. | 0 |
| RP11-761N21.1 |              | 0 | N.A. | 0 |
| RP11-762E8.1  |              | 0 | N.A. | 0 |
| RP11-762H8.1  |              | 0 | N.A. | 0 |
| RP11-762H8.3  |              | 0 | N.A. | 0 |
| RP11-762I7.5  | 0,031294157  | 0 | N.A. | 0 |
| RP11-764E7.1  |              | 0 | N.A. | 0 |
| RP11-764K9.1  |              | 0 | N.A. | 0 |
| RP11-767I20.1 |              | 0 | N.A. | 0 |
| RP11-767N15.1 |              | 0 | N.A. | 0 |
| RP11-768B22.2 |              | 0 | N.A. | 0 |
| RP11-768G7.2  |              | 0 | N.A. | 0 |
| RP11-769N22.1 |              | 0 | N.A. | 0 |
| RP11-769O8.1  | 0,205487926  | 0 | N.A. | 0 |
| RP11-769O8.2  |              | 0 | N.A. | 0 |
| RP11-76E17.3  | -0,087091051 | 0 | N.A. | 0 |
| RP11-76E17.4  |              | 0 | N.A. | 0 |
| RP11-76I14.1  |              | 0 | N.A. | 0 |
| RP11-770E5.1  |              | 0 | N.A. | 0 |
| RP11-770E5.3  |              | 0 | N.A. | 0 |
| RP11-773H22.4 | -0,169313749 | 0 | N.A. | 0 |
| RP11-774D14.1 |              | 0 | N.A. | 0 |
| RP11-775C24.3 |              | 0 | N.A. | 0 |
| RP11-775H9.3  |              | 0 | N.A. | 0 |
| RP11-77A13.1  |              | 0 | N.A. | 0 |
| RP11-77I22.2  | 0,007570482  | 0 | N.A. | 0 |
| RP11-77K12.1  | 0,1175721    | 0 | N.A. | 0 |
| RP11-77K12.7  | 0,07734317   | 0 | N.A. | 0 |
| RP11-780K2.1  |              | 0 | N.A. | 0 |
| RP11-781A6.1  |              | 0 | N.A. | 0 |

|               |  |              |   |      |   |
|---------------|--|--------------|---|------|---|
| RP11-789C2.1  |  | -0,180700722 | 0 | N.A. | 0 |
| RP11-78A19.4  |  | 0,242696037  | 0 | N.A. | 0 |
| RP11-78F17.1  |  |              | 0 | N.A. | 0 |
| RP11-791M20.1 |  |              | 0 | N.A. | 0 |
| RP11-794M8.1  |  |              | 0 | N.A. | 0 |
| RP11-794P6.6  |  |              | 0 | N.A. | 0 |
| RP11-797D24.3 |  | 0,119613478  | 0 | N.A. | 0 |
| RP11-797D24.4 |  | 0,160985156  | 0 | N.A. | 0 |
| RP11-798G7.5  |  |              | 0 | N.A. | 0 |
| RP11-798K3.3  |  |              | 0 | N.A. | 0 |
| RP11-799B12.2 |  |              | 0 | N.A. | 0 |
| RP11-799M12.2 |  |              | 0 | N.A. | 0 |
| RP11-799N11.1 |  |              | 0 | N.A. | 0 |
| RP11-79M19.2  |  |              | 0 | N.A. | 0 |
| RP11-79N23.1  |  |              | 0 | N.A. | 0 |
| RP11-7F17.3   |  |              | 0 | N.A. | 0 |
| RP11-7F17.5   |  |              | 0 | N.A. | 0 |
| RP11-7F17.7   |  |              | 0 | N.A. | 0 |
| RP11-7I15.3   |  | -0,019996083 | 0 | N.A. | 0 |
| RP11-800A3.3  |  |              | 0 | N.A. | 0 |
| RP11-804A23.4 |  |              | 0 | N.A. | 0 |
| RP11-805I24.3 |  |              | 0 | N.A. | 0 |
| RP11-806L2.2  |  |              | 0 | N.A. | 0 |
| RP11-806L2.6  |  |              | 0 | N.A. | 0 |
| RP11-807H22.7 |  |              | 0 | N.A. | 0 |
| RP11-809H16.5 |  |              | 0 | N.A. | 0 |
| RP11-809N8.2  |  |              | 0 | N.A. | 0 |
| RP11-80A15.1  |  | 0,142867239  | 0 | N.A. | 0 |
| RP11-80H5.9   |  | 0,006800455  | 0 | N.A. | 0 |
| RP11-810P12.5 |  |              | 0 | N.A. | 0 |
| RP11-814H16.2 |  |              | 0 | N.A. | 0 |
| RP11-815J21.2 |  |              | 0 | N.A. | 0 |
| RP11-815J21.3 |  |              | 0 | N.A. | 0 |

|                |              |   |      |   |
|----------------|--------------|---|------|---|
| RP11-815J21.4  | -0,087091051 | 0 | N.A. | 0 |
| RP11-815M8.1   | 0,060602299  | 0 | N.A. | 0 |
| RP11-816J6.3   | 0,076215755  | 0 | N.A. | 0 |
| RP11-817G13.3  |              | 0 | N.A. | 0 |
| RP11-817J15.3  | 0,295846442  | 0 | N.A. | 0 |
| RP11-81H14.1   |              | 0 | N.A. | 0 |
| RP11-81H3.2    | 0,271131357  | 0 | N.A. | 0 |
| RP11-81K2.1    |              | 0 | N.A. | 0 |
| RP11-820I16.1  |              | 0 | N.A. | 0 |
| RP11-820I16.3  | 0,234723945  | 0 | N.A. | 0 |
| RP11-829H16.3  |              | 0 | N.A. | 0 |
| RP11-82L7.4    |              | 0 | N.A. | 0 |
| RP11-82O19.1   | -0,059298536 | 0 | N.A. | 0 |
| RP11-830F9.5   |              | 0 | N.A. | 0 |
| RP11-834C11.11 | 0,118826305  | 0 | N.A. | 0 |
| RP11-834C11.4  |              | 0 | N.A. | 0 |
| RP11-834C11.5  |              | 0 | N.A. | 0 |
| RP11-834C11.6  |              | 0 | N.A. | 0 |
| RP11-834C11.8  |              | 0 | N.A. | 0 |
| RP11-837J7.4   | 0,147611564  | 0 | N.A. | 0 |
| RP11-839D17.3  |              | 0 | N.A. | 0 |
| RP11-839G9.1   | 0,275497721  | 0 | N.A. | 0 |
| RP11-83M16.6   |              | 0 | N.A. | 0 |
| RP11-83N9.6    |              | 0 | N.A. | 0 |
| RP11-840I19.3  |              | 0 | N.A. | 0 |
| RP11-843A23.1  |              | 0 | N.A. | 0 |
| RP11-843B15.2  |              | 0 | N.A. | 0 |
| RP11-844P9.2   | -0,086628904 | 0 | N.A. | 0 |
| RP11-845C23.3  |              | 0 | N.A. | 0 |
| RP11-845M18.6  |              | 0 | N.A. | 0 |
| RP11-845M18.7  |              | 0 | N.A. | 0 |
| RP11-847H18.2  | 0,022160425  | 0 | N.A. | 0 |
| RP11-847H18.3  | 0,005147662  | 0 | N.A. | 0 |

|               |              |   |      |   |
|---------------|--------------|---|------|---|
| RP11-848P1.3  |              | 0 | N.A. | 0 |
| RP11-849F2.5  |              | 0 | N.A. | 0 |
| RP11-84A14.5  |              | 0 | N.A. | 0 |
| RP11-84A19.2  | 0,230640844  | 0 | N.A. | 0 |
| RP11-84C10.2  |              | 0 | N.A. | 0 |
| RP11-84C13.2  | -0,052794271 | 0 | N.A. | 0 |
| RP11-84D1.1   |              | 0 | N.A. | 0 |
| RP11-84D1.2   |              | 0 | N.A. | 0 |
| RP11-854K16.3 |              | 0 | N.A. | 0 |
| RP11-855A2.3  |              | 0 | N.A. | 0 |
| RP11-855A2.5  |              | 0 | N.A. | 0 |
| RP11-856M7.6  | 0,01456601   | 0 | N.A. | 0 |
| RP11-857B24.5 | 0,044112527  | 0 | N.A. | 0 |
| RP11-85B7.4   |              | 0 | N.A. | 0 |
| RP11-85B7.5   | 0,041839506  | 0 | N.A. | 0 |
| RP11-85E16.1  |              | 0 | N.A. | 0 |
| RP11-85G18.6  |              | 0 | N.A. | 0 |
| RP11-85I21.1  |              | 0 | N.A. | 0 |
| RP11-860B13.1 |              | 0 | N.A. | 0 |
| RP11-861E21.2 |              | 0 | N.A. | 0 |
| RP11-862G15.2 |              | 0 | N.A. | 0 |
| RP11-862P13.1 |              | 0 | N.A. | 0 |
| RP11-863H1.1  |              | 0 | N.A. | 0 |
| RP11-863P13.1 |              | 0 | N.A. | 0 |
| RP11-863P13.4 |              | 0 | N.A. | 0 |
| RP11-863P13.5 |              | 0 | N.A. | 0 |
| RP11-864G5.3  | -0,076351601 | 0 | N.A. | 0 |
| RP11-864I4.1  | -0,238862676 | 0 | N.A. | 0 |
| RP11-864I4.4  | 0,041400317  | 0 | N.A. | 0 |
| RP11-865I6.2  |              | 0 | N.A. | 0 |
| RP11-867G2.5  | 0,146185406  | 0 | N.A. | 0 |
| RP11-867G2.8  | 0,035222078  | 0 | N.A. | 0 |
| RP11-867G23.2 |              | 0 | N.A. | 0 |

|               |              |   |      |   |
|---------------|--------------|---|------|---|
| RP11-867G23.3 |              | 0 | N.A. | 0 |
| RP11-867O8.5  | 0,301828534  | 0 | N.A. | 0 |
| RP11-875O11.2 |              | 0 | N.A. | 0 |
| RP11-876N24.2 |              | 0 | N.A. | 0 |
| RP11-879F14.1 |              | 0 | N.A. | 0 |
| RP11-879F14.2 | -0,263525398 | 0 | N.A. | 0 |
| RP11-879F14.3 |              | 0 | N.A. | 0 |
| RP11-87E22.2  |              | 0 | N.A. | 0 |
| RP11-87F15.2  | 0,286663739  | 0 | N.A. | 0 |
| RP11-881L2.1  | 0,241452567  | 0 | N.A. | 0 |
| RP11-881M11.1 | -0,014715036 | 0 | N.A. | 0 |
| RP11-881M11.2 |              | 0 | N.A. | 0 |
| RP11-881M11.4 |              | 0 | N.A. | 0 |
| RP11-883A18.3 | 0,069314768  | 0 | N.A. | 0 |
| RP11-885B4.2  |              | 0 | N.A. | 0 |
| RP11-885N19.6 |              | 0 | N.A. | 0 |
| RP11-886P16.6 |              | 0 | N.A. | 0 |
| RP11-887P2.5  |              | 0 | N.A. | 0 |
| RP11-888D10.3 |              | 0 | N.A. | 0 |
| RP11-88E10.4  |              | 0 | N.A. | 0 |
| RP11-88G17.6  |              | 0 | N.A. | 0 |
| RP11-88H9.2   |              | 0 | N.A. | 0 |
| RP11-893F2.13 |              | 0 | N.A. | 0 |
| RP11-893F2.14 |              | 0 | N.A. | 0 |
| RP11-893F2.15 |              | 0 | N.A. | 0 |
| RP11-893F2.5  |              | 0 | N.A. | 0 |
| RP11-893F2.6  |              | 0 | N.A. | 0 |
| RP11-894J14.5 |              | 0 | N.A. | 0 |
| RP11-895M11.3 |              | 0 | N.A. | 0 |
| RP11-89C3.4   |              | 0 | N.A. | 0 |
| RP11-89H19.1  |              | 0 | N.A. | 0 |
| RP11-89N17.1  |              | 0 | N.A. | 0 |
| RP11-8L8.2    |              | 0 | N.A. | 0 |



|               |  |              |      |      |   |
|---------------|--|--------------|------|------|---|
| RP11-900F13.2 |  | 0            | N.A. | 0    |   |
| RP11-900F13.3 |  | -0,093920636 | 0    | N.A. | 0 |
| RP11-903H12.3 |  | 0,101926428  | 0    | N.A. | 0 |
| RP11-903H12.5 |  | 0,287638428  | 0    | N.A. | 0 |
| RP11-905K4.1  |  |              | 0    | N.A. | 0 |
| RP11-90B22.1  |  | 0,272093854  | 0    | N.A. | 0 |
| RP11-90C1.1   |  |              | 0    | N.A. | 0 |
| RP11-90J7.2   |  |              | 0    | N.A. | 0 |
| RP11-90J7.4   |  |              | 0    | N.A. | 0 |
| RP11-90L20.2  |  |              | 0    | N.A. | 0 |
| RP11-90P13.1  |  |              | 0    | N.A. | 0 |
| RP11-90P5.2   |  | 0,319402286  | 0    | N.A. | 0 |
| RP11-91A18.4  |  |              | 0    | N.A. | 0 |
| RP11-91I20.2  |  |              | 0    | N.A. | 0 |
| RP11-91I20.3  |  |              | 0    | N.A. | 0 |
| RP11-91I20.4  |  |              | 0    | N.A. | 0 |
| RP11-91I8.3   |  |              | 0    | N.A. | 0 |
| RP11-91J19.3  |  | -0,338316193 | 0    | N.A. | 0 |
| RP11-91K8.5   |  | 0,284521957  | 0    | N.A. | 0 |
| RP11-91K9.1   |  |              | 0    | N.A. | 0 |
| RP11-91P24.5  |  |              | 0    | N.A. | 0 |
| RP11-91P24.6  |  | -0,105785875 | 0    | N.A. | 0 |
| RP11-91P24.7  |  | -0,030506586 | 0    | N.A. | 0 |
| RP11-923I11.3 |  |              | 0    | N.A. | 0 |
| RP11-923I11.5 |  |              | 0    | N.A. | 0 |
| RP11-923I11.6 |  |              | 0    | N.A. | 0 |
| RP11-923I11.8 |  |              | 0    | N.A. | 0 |
| RP11-92C4.3   |  | 0,104529206  | 0    | N.A. | 0 |
| RP11-92K15.1  |  |              | 0    | N.A. | 0 |
| RP11-930P14.1 |  |              | 0    | N.A. | 0 |
| RP11-932O9.7  |  | -0,049240528 | 0    | N.A. | 0 |
| RP11-932O9.8  |  | 0,013324742  | 0    | N.A. | 0 |
| RP11-932O9.9  |  |              | 0    | N.A. | 0 |

|                |  |              |      |      |   |
|----------------|--|--------------|------|------|---|
| RP11-93I21.3   |  | 0            | N.A. | 0    |   |
| RP11-93K22.6   |  | -0,040132196 | 0    | N.A. | 0 |
| RP11-944L7.4   |  |              | 0    | N.A. | 0 |
| RP11-946L16.2  |  |              | 0    | N.A. | 0 |
| RP11-946L20.2  |  | 0,364379078  | 0    | N.A. | 0 |
| RP11-94A24.1   |  | 0,401970305  | 0    | N.A. | 0 |
| RP11-94B19.3   |  |              | 0    | N.A. | 0 |
| RP11-94C24.13  |  |              | 0    | N.A. | 0 |
| RP11-94H18.1   |  |              | 0    | N.A. | 0 |
| RP11-950C14.3  |  |              | 0    | N.A. | 0 |
| RP11-950C14.7  |  | -0,179645805 | 0    | N.A. | 0 |
| RP11-955H22.1  |  |              | 0    | N.A. | 0 |
| RP11-956E11.1  |  |              | 0    | N.A. | 0 |
| RP11-95H3.1    |  |              | 0    | N.A. | 0 |
| RP11-95I16.6   |  | 0,089738762  | 0    | N.A. | 0 |
| RP11-95M5.1    |  | -0,108258475 | 0    | N.A. | 0 |
| RP11-960L18.1  |  |              | 0    | N.A. | 0 |
| RP11-961A15.1  |  |              | 0    | N.A. | 0 |
| RP11-962G15.1  |  | -0,209276001 | 0    | N.A. | 0 |
| RP11-968A15.2  |  |              | 0    | N.A. | 0 |
| RP11-96A15.1   |  | 0,194997311  | 0    | N.A. | 0 |
| RP11-96B2.1    |  | 0,294749356  | 0    | N.A. | 0 |
| RP11-96B5.3    |  | 0,018448765  | 0    | N.A. | 0 |
| RP11-96C21.1   |  | -0,23918289  | 0    | N.A. | 0 |
| RP11-96K19.2   |  | -0,225987027 | 0    | N.A. | 0 |
| RP11-96P7.1    |  |              | 0    | N.A. | 0 |
| RP11-973H7.1   |  |              | 0    | N.A. | 0 |
| RP11-973H7.4   |  |              | 0    | N.A. | 0 |
| RP11-976B16.1  |  |              | 0    | N.A. | 0 |
| RP11-977G19.10 |  | 0,018448765  | 0    | N.A. | 0 |
| RP11-977G19.14 |  |              | 0    | N.A. | 0 |
| RP11-981G7.2   |  |              | 0    | N.A. | 0 |
| RP11-982M15.2  |  | 0,17181073   | 0    | N.A. | 0 |

|                 |              |   |      |   |
|-----------------|--------------|---|------|---|
| RP11-982M15.7   |              | 0 | N.A. | 0 |
| RP11-982M15.8   |              | 0 | N.A. | 0 |
| RP11-989F5.1    |              | 0 | N.A. | 0 |
| RP11-989F5.3    |              | 0 | N.A. | 0 |
| RP11-98D18.1    | 0,01926779   | 0 | N.A. | 0 |
| RP11-98D18.15   |              | 0 | N.A. | 0 |
| RP11-98F14.11   | 0,132468456  | 0 | N.A. | 0 |
| RP11-991C1.1    |              | 0 | N.A. | 0 |
| RP11-998D10.4   |              | 0 | N.A. | 0 |
| RP11-99E15.2    | 0,314760534  | 0 | N.A. | 0 |
| RP11-99J16--A.2 | -0,094981875 | 0 | N.A. | 0 |
| RP11-99L13.2    |              | 0 | N.A. | 0 |
| RP11-9G1.3      |              | 0 | N.A. | 0 |
| RP11-9M16.2     |              | 0 | N.A. | 0 |
| RP11-9N20.3     | 0,126983831  | 0 | N.A. | 0 |
| RP13-1016M1.2   |              | 0 | N.A. | 0 |
| RP13-1039J1.3   |              | 0 | N.A. | 0 |
| RP13-126P21.2   |              | 0 | N.A. | 0 |
| RP13-143G15.4   |              | 0 | N.A. | 0 |
| RP13-16H11.2    | -0,266207112 | 0 | N.A. | 0 |
| RP13-16H11.5    | -0,088907486 | 0 | N.A. | 0 |
| RP13-228J13.1   |              | 0 | N.A. | 0 |
| RP13-270P17.2   | 0,047601491  | 0 | N.A. | 0 |
| RP13-297E16.4   |              | 0 | N.A. | 0 |
| RP13-349O20.2   |              | 0 | N.A. | 0 |
| RP13-379O24.2   |              | 0 | N.A. | 0 |
| RP13-436F16.1   | -0,126200059 | 0 | N.A. | 0 |
| RP13-444H2.1    |              | 0 | N.A. | 0 |
| RP13-465B17.4   |              | 0 | N.A. | 0 |
| RP13-465B17.5   | -0,113438735 | 0 | N.A. | 0 |
| RP13-476E20.1   |              | 0 | N.A. | 0 |
| RP13-49I15.6    | 0,289394926  | 0 | N.A. | 0 |
| RP13-514E23.2   |              | 0 | N.A. | 0 |

|               |              |   |      |   |
|---------------|--------------|---|------|---|
| RP13-516M14.2 |              | 0 | N.A. | 0 |
| RP13-578N3.3  |              | 0 | N.A. | 0 |
| RP13-614K11.2 |              | 0 | N.A. | 0 |
| RP13-631K18.2 | 0,335806186  | 0 | N.A. | 0 |
| RP13-631K18.3 |              | 0 | N.A. | 0 |
| RP13-631K18.5 |              | 0 | N.A. | 0 |
| RP13-638C3.3  | 0,098314877  | 0 | N.A. | 0 |
| RP13-672B3.2  | 0,282586412  | 0 | N.A. | 0 |
| RP13-735L24.1 |              | 0 | N.A. | 0 |
| RP13-766D20.2 | -0,019422578 | 0 | N.A. | 0 |
| RP13-820C6.2  | -0,089380209 | 0 | N.A. | 0 |
| RP13-884E18.2 | 0,161501152  | 0 | N.A. | 0 |
| RP13-884E18.4 |              | 0 | N.A. | 0 |
| RP13-895J2.2  | 0,085348244  | 0 | N.A. | 0 |
| RP13-895J2.6  | 0,144277124  | 0 | N.A. | 0 |
| RP13-941N14.1 |              | 0 | N.A. | 0 |
| RP13-977J11.8 |              | 0 | N.A. | 0 |
| RP13-977J11.9 |              | 0 | N.A. | 0 |
| RP13-991F5.2  |              | 0 | N.A. | 0 |
| RP3-322G13.7  | -0,310739126 | 0 | N.A. | 0 |
| RP3-323N1.2   |              | 0 | N.A. | 0 |
| RP3-325F22.3  |              | 0 | N.A. | 0 |
| RP3-329A5.8   |              | 0 | N.A. | 0 |
| RP3-330M21.5  |              | 0 | N.A. | 0 |
| RP3-331H24.5  |              | 0 | N.A. | 0 |
| RP3-332B22.1  | -0,025234084 | 0 | N.A. | 0 |
| RP3-333A15.1  |              | 0 | N.A. | 0 |
| RP3-333B15.5  | -0,148589307 | 0 | N.A. | 0 |
| RP3-337H4.8   |              | 0 | N.A. | 0 |
| RP3-340N1.2   |              | 0 | N.A. | 0 |
| RP3-355L5.4   |              | 0 | N.A. | 0 |
| RP3-359N14.2  |              | 0 | N.A. | 0 |
| RP3-369A17.4  |              | 0 | N.A. | 0 |

|               |  |              |      |      |   |
|---------------|--|--------------|------|------|---|
| RP3-388M5.9   |  | 0            | N.A. | 0    |   |
| RP3-395M20.2  |  | 0            | N.A. | 0    |   |
| RP3-400B16.1  |  | 0            | N.A. | 0    |   |
| RP3-400B16.4  |  | 0            | N.A. | 0    |   |
| RP3-403L10.3  |  | 0            | N.A. | 0    |   |
| RP3-405J10.4  |  | 0            | N.A. | 0    |   |
| RP3-406P24.3  |  | -0,030121414 | 0    | N.A. | 0 |
| RP3-413H6.2   |  | 0            | N.A. | 0    |   |
| RP3-425P12.1  |  | 0            | N.A. | 0    |   |
| RP3-425P12.5  |  | 0            | N.A. | 0    |   |
| RP3-428L16.1  |  | 0            | N.A. | 0    |   |
| RP3-429O6.1   |  | 0            | N.A. | 0    |   |
| RP3-430N8.11  |  | 0,212849304  | 0    | N.A. | 0 |
| RP3-434P1.6   |  | 0,084366803  | 0    | N.A. | 0 |
| RP3-438O4.4   |  | 0,456794633  | 0    | N.A. | 0 |
| RP3-439F8.1   |  | 0,02386129   | 0    | N.A. | 0 |
| RP3-441A12.1  |  | -0,063223559 | 0    | N.A. | 0 |
| RP3-448I9.2   |  | 0            | N.A. | 0    |   |
| RP3-449H6.1   |  | 0            | N.A. | 0    |   |
| RP3-449M8.6   |  | 0            | N.A. | 0    |   |
| RP3-462D8.2   |  | 0            | N.A. | 0    |   |
| RP3-466P17.2  |  | 0            | N.A. | 0    |   |
| RP3-467K16.7  |  | 0            | N.A. | 0    |   |
| RP3-468B3.2   |  | 0            | N.A. | 0    |   |
| RP3-470B24.5  |  | 0            | N.A. | 0    |   |
| RP3-471M13.2  |  | 0,322723805  | 0    | N.A. | 0 |
| RP3-483K16.4  |  | 0            | N.A. | 0    |   |
| RP3-486I3.5   |  | 0            | N.A. | 0    |   |
| RP3-486I3.7   |  | -0,080325017 | 0    | N.A. | 0 |
| RP3-495K2.2   |  | 0            | N.A. | 0    |   |
| RP3-508I15.10 |  | 0            | N.A. | 0    |   |
| RP3-508I15.19 |  | 0            | N.A. | 0    |   |
| RP3-510H16.3  |  | 0            | N.A. | 0    |   |

|               |  |              |   |      |   |
|---------------|--|--------------|---|------|---|
| RP3-512E2.2   |  |              | 0 | N.A. | 0 |
| RP3-522J7.6   |  | 0,057897758  | 0 | N.A. | 0 |
| RP3-522P13.3  |  |              | 0 | N.A. | 0 |
| RP3-523C21.2  |  | 0,077261407  | 0 | N.A. | 0 |
| RP3-525N10.2  |  |              | 0 | N.A. | 0 |
| RP4-529N6.1   |  |              | 0 | N.A. | 0 |
| RP4-530I15.6  |  |              | 0 | N.A. | 0 |
| RP4-530I15.9  |  |              | 0 | N.A. | 0 |
| RP4-535B20.4  |  | -0,102742458 | 0 | N.A. | 0 |
| RP4-536B24.2  |  |              | 0 | N.A. | 0 |
| RP4-536B24.3  |  |              | 0 | N.A. | 0 |
| RP4-537K23.4  |  | 0,382408213  | 0 | N.A. | 0 |
| RP4-539M6.14  |  |              | 0 | N.A. | 0 |
| RP4-539M6.19  |  |              | 0 | N.A. | 0 |
| RP4-543J13.1  |  |              | 0 | N.A. | 0 |
| RP4-549F15.1  |  |              | 0 | N.A. | 0 |
| RP4-550H1.4   |  |              | 0 | N.A. | 0 |
| RP4-553F4.2   |  |              | 0 | N.A. | 0 |
| RP4-555D20.2  |  |              | 0 | N.A. | 0 |
| RP4-555D20.4  |  |              | 0 | N.A. | 0 |
| RP4-555L14.4  |  |              | 0 | N.A. | 0 |
| RP4-575N6.4   |  |              | 0 | N.A. | 0 |
| RP4-580N22.2  |  |              | 0 | N.A. | 0 |
| RP4-583P15.16 |  |              | 0 | N.A. | 0 |
| RP4-584D14.5  |  | -0,220869649 | 0 | N.A. | 0 |
| RP4-584D14.6  |  |              | 0 | N.A. | 0 |
| RP4-585I14.3  |  |              | 0 | N.A. | 0 |
| RP4-594A5.1   |  | 0,05426266   | 0 | N.A. | 0 |
| RP4-598P13.1  |  |              | 0 | N.A. | 0 |
| RP4-601P9.2   |  |              | 0 | N.A. | 0 |
| RP4-604G5.1   |  |              | 0 | N.A. | 0 |
| RP4-604K5.3   |  |              | 0 | N.A. | 0 |
| RP4-607I7.1   |  |              | 0 | N.A. | 0 |

|                 |  |              |      |      |   |
|-----------------|--|--------------|------|------|---|
| RP4-613B23.5    |  | 0            | N.A. | 0    |   |
| RP4-614O4.11    |  | 0,35469583   | 0    | N.A. | 0 |
| RP4-616B8.5     |  | 0,042809058  | 0    | N.A. | 0 |
| RP4-620F22.2    |  |              | 0    | N.A. | 0 |
| RP4-621B10.8    |  | 0,311341217  | 0    | N.A. | 0 |
| RP4-633I8.4     |  |              | 0    | N.A. | 0 |
| RP4-633O19--A.1 |  | 0,023762925  | 0    | N.A. | 0 |
| RP4-639J15.3    |  |              | 0    | N.A. | 0 |
| RP4-640H8.2     |  |              | 0    | N.A. | 0 |
| RP4-644L1.2     |  |              | 0    | N.A. | 0 |
| RP4-647C14.2    |  |              | 0    | N.A. | 0 |
| RP4-655C5.4     |  |              | 0    | N.A. | 0 |
| RP4-660H19.1    |  | 0,273853928  | 0    | N.A. | 0 |
| RP4-663N10.1    |  |              | 0    | N.A. | 0 |
| RP4-668J24.2    |  |              | 0    | N.A. | 0 |
| RP4-669P10.16   |  | 0,133483091  | 0    | N.A. | 0 |
| RP4-669P10.20   |  |              | 0    | N.A. | 0 |
| RP4-676J13.2    |  |              | 0    | N.A. | 0 |
| RP4-678D15.1    |  | 0,03776502   | 0    | N.A. | 0 |
| RP4-680D5.9     |  |              | 0    | N.A. | 0 |
| RP4-681N20.5    |  |              | 0    | N.A. | 0 |
| RP4-682C21.5    |  |              | 0    | N.A. | 0 |
| RP4-684O24.5    |  |              | 0    | N.A. | 0 |
| RP4-686C3.7     |  |              | 0    | N.A. | 0 |
| RP4-694A7.2     |  |              | 0    | N.A. | 0 |
| RP4-706G24.1    |  |              | 0    | N.A. | 0 |
| RP4-712E4.1     |  | 0,107001707  | 0    | N.A. | 0 |
| RP4-712E4.2     |  | 0,087656925  | 0    | N.A. | 0 |
| RP4-715N11.2    |  |              | 0    | N.A. | 0 |
| RP4-724E16.2    |  | 0,02498731   | 0    | N.A. | 0 |
| RP4-734C18.1    |  |              | 0    | N.A. | 0 |
| RP4-735C1.4     |  |              | 0    | N.A. | 0 |
| RP4-736L20.3    |  | -0,168168316 | 0    | N.A. | 0 |

|               |  |              |      |      |   |
|---------------|--|--------------|------|------|---|
| RP4-738P15.1  |  | 0            | N.A. | 0    |   |
| RP4-742J24.2  |  | 0            | N.A. | 0    |   |
| RP4-745E8.2   |  | 0            | N.A. | 0    |   |
| RP4-751H13.7  |  | 0            | N.A. | 0    |   |
| RP4-752I6.1   |  | 0            | N.A. | 0    |   |
| RP4-760C5.5   |  | 0            | N.A. | 0    |   |
| RP4-765H13.1  |  | 0            | N.A. | 0    |   |
| RP4-769N13.7  |  | -0,082307229 | 0    | N.A. | 0 |
| RP4-771M4.3   |  | 0            | N.A. | 0    |   |
| RP4-777L9.3   |  | 0            | N.A. | 0    |   |
| RP4-777O23.1  |  | 0            | N.A. | 0    |   |
| RP4-777O23.3  |  | -0,330646628 | 0    | N.A. | 0 |
| RP4-778K6.3   |  | 0            | N.A. | 0    |   |
| RP4-781K5.5   |  | 0            | N.A. | 0    |   |
| RP4-781K5.6   |  | 0            | N.A. | 0    |   |
| RP4-784A16.5  |  | 0            | N.A. | 0    |   |
| RP4-791M13.3  |  | 0            | N.A. | 0    |   |
| RP4-798A10.4  |  | 0            | N.A. | 0    |   |
| RP4-799D16.1  |  | 0            | N.A. | 0    |   |
| RP4-806M20.3  |  | 0            | N.A. | 0    |   |
| RP4-806M20.4  |  | 0            | N.A. | 0    |   |
| RP4-809F18.2  |  | 0            | N.A. | 0    |   |
| RP4-813D12.3  |  | -0,234142143 | 0    | N.A. | 0 |
| RP4-816N1.7   |  | 0,107840651  | 0    | N.A. | 0 |
| RP5-1011O1.3  |  | 0            | N.A. | 0    |   |
| RP5-1017F8.2  |  | 0            | N.A. | 0    |   |
| RP5-1018K9.1  |  | 0,14797175   | 0    | N.A. | 0 |
| RP5-1021I20.2 |  | 0            | N.A. | 0    |   |
| RP5-1021I20.4 |  | -0,070338456 | 0    | N.A. | 0 |
| RP5-1021I20.5 |  | 0,175796347  | 0    | N.A. | 0 |
| RP5-1021I20.8 |  | 0,128298425  | 0    | N.A. | 0 |
| RP5-1022P6.5  |  | 0            | N.A. | 0    |   |
| RP5-1022P6.7  |  | -0,153902306 | 0    | N.A. | 0 |



|                |              |   |      |   |
|----------------|--------------|---|------|---|
| RP5-1024C24.1  |              | 0 | N.A. | 0 |
| RP5-1024G6.2   |              | 0 | N.A. | 0 |
| RP5-1024N4.2   |              | 0 | N.A. | 0 |
| RP5-1024N4.4   | 0,011169857  | 0 | N.A. | 0 |
| RP5-1029F21.3  |              | 0 | N.A. | 0 |
| RP5-1031D4.2   |              | 0 | N.A. | 0 |
| RP5-1039K5.17  | -0,299354089 | 0 | N.A. | 0 |
| RP5-1039K5.18  |              | 0 | N.A. | 0 |
| RP5-1042K10.13 |              | 0 | N.A. | 0 |
| RP5-1050D4.2   |              | 0 | N.A. | 0 |
| RP5-1050D4.4   | 0,339502795  | 0 | N.A. | 0 |
| RP5-1050E16.2  |              | 0 | N.A. | 0 |
| RP5-1052I5.2   |              | 0 | N.A. | 0 |
| RP5-1056L3.1   |              | 0 | N.A. | 0 |
| RP5-1057B20.3  |              | 0 | N.A. | 0 |
| RP5-1065P14.2  |              | 0 | N.A. | 0 |
| RP5-1066H13.4  |              | 0 | N.A. | 0 |
| RP5-1068H6.6   |              | 0 | N.A. | 0 |
| RP5-1069C8.2   |              | 0 | N.A. | 0 |
| RP5-1071N3.1   |              | 0 | N.A. | 0 |
| RP5-1077I2.3   | 0,105416771  | 0 | N.A. | 0 |
| RP5-1087E8.3   | -0,100625426 | 0 | N.A. | 0 |
| RP5-1092A11.5  |              | 0 | N.A. | 0 |
| RP5-1092A3.5   |              | 0 | N.A. | 0 |
| RP5-1096D14.3  |              | 0 | N.A. | 0 |
| RP5-1096J16.1  |              | 0 | N.A. | 0 |
| RP5-1101C3.1   | 0,251966183  | 0 | N.A. | 0 |
| RP5-1102E8.3   |              | 0 | N.A. | 0 |
| RP5-1103G7.10  |              | 0 | N.A. | 0 |
| RP5-1113E3.3   |              | 0 | N.A. | 0 |
| RP5-1115A15.1  | 0,143789501  | 0 | N.A. | 0 |
| RP5-1116H23.3  | 0,044112527  | 0 | N.A. | 0 |
| RP5-1116H23.5  |              | 0 | N.A. | 0 |

|               |  |              |      |      |   |
|---------------|--|--------------|------|------|---|
| RP5-1116H23.6 |  | 0            | N.A. | 0    |   |
| RP5-1120P11.3 |  | 0            | N.A. | 0    |   |
| RP5-1121H13.4 |  | 0            | N.A. | 0    |   |
| RP5-1142A6.10 |  | 0            | N.A. | 0    |   |
| RP5-1142A6.2  |  | 0            | N.A. | 0    |   |
| RP5-1142A6.9  |  | 0            | N.A. | 0    |   |
| RP5-1142J19.1 |  | 0            | N.A. | 0    |   |
| RP5-1172A22.1 |  | 0            | N.A. | 0    |   |
| RP5-1172N10.2 |  | -0,088928456 | 0    | N.A. | 0 |
| RP5-1180E21.4 |  | 0,097617444  | 0    | N.A. | 0 |
| RP5-1182A14.5 |  | 0            | N.A. | 0    |   |
| RP5-1184F4.5  |  | -0,100152379 | 0    | N.A. | 0 |
| RP5-1184F4.7  |  | 0            | N.A. | 0    |   |
| RP5-1185H19.2 |  | -0,136494867 | 0    | N.A. | 0 |
| RP5-823G15.5  |  | -0,048863145 | 0    | N.A. | 0 |
| RP5-828H9.1   |  | 0            | N.A. | 0    |   |
| RP5-836J3.1   |  | 0            | N.A. | 0    |   |
| RP5-837I24.4  |  | 0            | N.A. | 0    |   |
| RP5-839B4.8   |  | -0,050139777 | 0    | N.A. | 0 |
| RP5-855D21.1  |  | 0            | N.A. | 0    |   |
| RP5-856G1.1   |  | -0,150347513 | 0    | N.A. | 0 |
| RP5-864K19.6  |  | 0,360634656  | 0    | N.A. | 0 |
| RP5-867C24.5  |  | 0            | N.A. | 0    |   |
| RP5-881P19.7  |  | 0            | N.A. | 0    |   |
| RP5-884C9.2   |  | 0            | N.A. | 0    |   |
| RP5-887A10.1  |  | 0            | N.A. | 0    |   |
| RP5-890E16.5  |  | 0            | N.A. | 0    |   |
| RP5-899B16.1  |  | 0,101741538  | 0    | N.A. | 0 |
| RP5-901A4.1   |  | 0            | N.A. | 0    |   |
| RP5-902P8.10  |  | 0,030548322  | 0    | N.A. | 0 |
| RP5-902P8.12  |  | -0,120597876 | 0    | N.A. | 0 |
| RP5-905N1.2   |  | 0            | N.A. | 0    |   |
| RP5-906C1.1   |  | 0            | N.A. | 0    |   |

|              |  |              |      |      |   |
|--------------|--|--------------|------|------|---|
| RP5-907D15.3 |  | 0            | N.A. | 0    |   |
| RP5-907D15.4 |  | 0,121777708  | 0    | N.A. | 0 |
| RP5-919F19.5 |  |              | 0    | N.A. | 0 |
| RP5-921G16.1 |  | 0,214110073  | 0    | N.A. | 0 |
| RP5-921G16.2 |  |              | 0    | N.A. | 0 |
| RP5-930J4.2  |  |              | 0    | N.A. | 0 |
| RP5-940J5.3  |  |              | 0    | N.A. | 0 |
| RP5-940J5.8  |  |              | 0    | N.A. | 0 |
| RP5-947P14.1 |  |              | 0    | N.A. | 0 |
| RP5-952N6.1  |  |              | 0    | N.A. | 0 |
| RP5-956O18.3 |  |              | 0    | N.A. | 0 |
| RP5-965F6.2  |  |              | 0    | N.A. | 0 |
| RP5-966M1.6  |  | -0,195763393 | 0    | N.A. | 0 |
| RP5-968D22.1 |  |              | 0    | N.A. | 0 |
| RP5-971N18.3 |  |              | 0    | N.A. | 0 |
| RP5-973N23.4 |  |              | 0    | N.A. | 0 |
| RP5-981O7.2  |  | -0,055489061 | 0    | N.A. | 0 |
| RP5-991G20.2 |  | -0,072500795 | 0    | N.A. | 0 |
| RP5-991G20.6 |  | -0,178047786 | 0    | N.A. | 0 |
| RP5-997D24.3 |  |              | 0    | N.A. | 0 |
| RP5-998N21.4 |  |              | 0    | N.A. | 0 |
| RP6-109B7.2  |  |              | 0    | N.A. | 0 |
| RP6-114E22.1 |  | -0,042302686 | 0    | N.A. | 0 |
| RP6-159A1.4  |  | 0,251277806  | 0    | N.A. | 0 |
| RP6-191P20.4 |  |              | 0    | N.A. | 0 |
| RP6-74O6.2   |  |              | 0    | N.A. | 0 |
| RP6-91H8.2   |  |              | 0    | N.A. | 0 |
| RP6-91H8.5   |  |              | 0    | N.A. | 0 |
| RPEL1        |  | -0,150198417 | 0    | N.A. | 0 |
| RPGRIP1      |  |              | 0    | N.A. | 0 |
| RPH3A        |  |              | 0    | N.A. | 0 |
| RRH          |  |              | 0    | N.A. | 0 |
| RRM1-AS1     |  |              | 0    | N.A. | 0 |

|            |  |              |   |      |   |
|------------|--|--------------|---|------|---|
| RSPH4A     |  |              | 0 | N.A. | 0 |
| RSPO1      |  | 0,047658527  | 0 | N.A. | 0 |
| RSPO4      |  | -0,05083931  | 0 | N.A. | 0 |
| RTCA-AS1   |  | -0,066195532 | 0 | N.A. | 0 |
| RTEL1      |  | 0,055551195  | 0 | N.A. | 0 |
| RTP1       |  |              | 0 | N.A. | 0 |
| RTP5       |  |              | 0 | N.A. | 0 |
| RUFY4      |  | 0,04909427   | 0 | N.A. | 0 |
| RUVBL1-AS1 |  |              | 0 | N.A. | 0 |
| RXFP1      |  |              | 0 | N.A. | 0 |
| RXRG       |  |              | 0 | N.A. | 0 |
| RYR1       |  |              | 0 | N.A. | 0 |
| RYR3       |  |              | 0 | N.A. | 0 |
| S100G      |  | -0,008452583 | 0 | N.A. | 0 |
| S1PR5      |  |              | 0 | N.A. | 0 |
| SAA2-SAA4  |  | 0,301828534  | 0 | N.A. | 0 |
| SACS-AS1   |  |              | 0 | N.A. | 0 |
| SAGE1      |  |              | 0 | N.A. | 0 |
| SALL1      |  |              | 0 | N.A. | 0 |
| SALL2      |  |              | 0 | N.A. | 0 |
| SAMD7      |  |              | 0 | N.A. | 0 |
| SAMSN1-AS1 |  |              | 0 | N.A. | 0 |
| SAPCD1     |  | -0,123447259 | 0 | N.A. | 0 |
| SARDH      |  |              | 0 | N.A. | 0 |
| SBK3       |  |              | 0 | N.A. | 0 |
| SCARA5     |  |              | 0 | N.A. | 0 |
| SCARNA9    |  | -0,192592473 | 0 | N.A. | 0 |
| SCGB1A1    |  |              | 0 | N.A. | 0 |
| SCGB1D2    |  |              | 0 | N.A. | 0 |
| SCGB2A2    |  |              | 0 | N.A. | 0 |
| SCGB2B2    |  |              | 0 | N.A. | 0 |
| SCGB3A1    |  | 0,262738574  | 0 | N.A. | 0 |
| SCHIP1     |  |              | 0 | N.A. | 0 |

|              |  |              |   |      |   |
|--------------|--|--------------|---|------|---|
| SCHLAP1      |  |              | 0 | N.A. | 0 |
| SCIMP        |  | -0,238678317 | 0 | N.A. | 0 |
| SCN2A        |  |              | 0 | N.A. | 0 |
| SCN2B        |  |              | 0 | N.A. | 0 |
| SCN4B        |  | 0,221072751  | 0 | N.A. | 0 |
| SCN5A        |  |              | 0 | N.A. | 0 |
| SCN7A        |  |              | 0 | N.A. | 0 |
| SCUBE1       |  |              | 0 | N.A. | 0 |
| SDK1         |  |              | 0 | N.A. | 0 |
| SDPR         |  | 0,178485334  | 0 | N.A. | 0 |
| SDR9C7       |  | 0,012371259  | 0 | N.A. | 0 |
| SEC14L5      |  | 0,139011887  | 0 | N.A. | 0 |
| SEC14L6      |  |              | 0 | N.A. | 0 |
| SEC62-AS1    |  | 0,04509252   | 0 | N.A. | 0 |
| SEL1L2       |  | 0,275184814  | 0 | N.A. | 0 |
| SELP         |  |              | 0 | N.A. | 0 |
| SELV         |  |              | 0 | N.A. | 0 |
| SEMA3E       |  |              | 0 | N.A. | 0 |
| SEMA3F-AS1   |  |              | 0 | N.A. | 0 |
| SEMA5B       |  |              | 0 | N.A. | 0 |
| SENCR        |  | -0,338316193 | 0 | N.A. | 0 |
| SENP3-EIF4A1 |  |              | 0 | N.A. | 0 |
| SEPT4-AS1    |  | -0,282912902 | 0 | N.A. | 0 |
| SERPINA3     |  |              | 0 | N.A. | 0 |
| SERPINA5     |  |              | 0 | N.A. | 0 |
| SERPINA9     |  |              | 0 | N.A. | 0 |
| SERPINB13    |  |              | 0 | N.A. | 0 |
| SERPINC1     |  | 0,04503565   | 0 | N.A. | 0 |
| SERPINE3     |  |              | 0 | N.A. | 0 |
| SERPINI2     |  |              | 0 | N.A. | 0 |
| SERTM1       |  |              | 0 | N.A. | 0 |
| SEZ6L        |  |              | 0 | N.A. | 0 |
| SFMBT2       |  | 0,279288119  | 0 | N.A. | 0 |

|             |  |              |   |      |   |
|-------------|--|--------------|---|------|---|
| SFTPB       |  | 0,085086587  | 0 | N.A. | 0 |
| SFTPD       |  |              | 0 | N.A. | 0 |
| SGCA        |  | -0,168610581 | 0 | N.A. | 0 |
| SGCD        |  |              | 0 | N.A. | 0 |
| SGCG        |  |              | 0 | N.A. | 0 |
| SGIP1       |  | 0,042606676  | 0 | N.A. | 0 |
| SH2D1B      |  |              | 0 | N.A. | 0 |
| SH2D7       |  | -0,174508826 | 0 | N.A. | 0 |
| SH3GL3      |  |              | 0 | N.A. | 0 |
| SH3RF3-AS1  |  |              | 0 | N.A. | 0 |
| SHANK1      |  |              | 0 | N.A. | 0 |
| SHCBP1L     |  |              | 0 | N.A. | 0 |
| SHE         |  | -0,110941701 | 0 | N.A. | 0 |
| SHOX        |  | 0,020125584  | 0 | N.A. | 0 |
| SIAH2-AS1   |  |              | 0 | N.A. | 0 |
| SIAH3       |  |              | 0 | N.A. | 0 |
| SIGLEC11    |  |              | 0 | N.A. | 0 |
| SIGLEC14    |  |              | 0 | N.A. | 0 |
| SIGLEC5     |  |              | 0 | N.A. | 0 |
| SIGLEC6     |  | -0,080170565 | 0 | N.A. | 0 |
| SIGLEC8     |  |              | 0 | N.A. | 0 |
| SIM1        |  |              | 0 | N.A. | 0 |
| SIRPB2      |  |              | 0 | N.A. | 0 |
| SIRPD       |  |              | 0 | N.A. | 0 |
| SIRPG-AS1   |  |              | 0 | N.A. | 0 |
| SLC10A1     |  |              | 0 | N.A. | 0 |
| SLC10A4     |  | -0,073585913 | 0 | N.A. | 0 |
| SLC10A6     |  |              | 0 | N.A. | 0 |
| SLC12A1     |  |              | 0 | N.A. | 0 |
| SLC12A3     |  |              | 0 | N.A. | 0 |
| SLC14A2-AS1 |  |              | 0 | N.A. | 0 |
| SLC16A6     |  | -0,048345425 | 0 | N.A. | 0 |
| SLC16A8     |  |              | 0 | N.A. | 0 |

|             |  |              |   |      |   |
|-------------|--|--------------|---|------|---|
| SLC17A3     |  |              | 0 | N.A. | 0 |
| SLC1A6      |  |              | 0 | N.A. | 0 |
| SLC22A10    |  |              | 0 | N.A. | 0 |
| SLC22A13    |  |              | 0 | N.A. | 0 |
| SLC22A16    |  |              | 0 | N.A. | 0 |
| SLC22A9     |  |              | 0 | N.A. | 0 |
| SLC24A2     |  | 0,344148805  | 0 | N.A. | 0 |
| SLC24A4     |  | 0,154953718  | 0 | N.A. | 0 |
| SLC24A5     |  |              | 0 | N.A. | 0 |
| SLC25A2     |  |              | 0 | N.A. | 0 |
| SLC25A31    |  |              | 0 | N.A. | 0 |
| SLC25A52    |  |              | 0 | N.A. | 0 |
| SLC26A4-AS1 |  |              | 0 | N.A. | 0 |
| SLC26A5     |  |              | 0 | N.A. | 0 |
| SLC27A6     |  |              | 0 | N.A. | 0 |
| SLC28A1     |  |              | 0 | N.A. | 0 |
| SLC2A7      |  |              | 0 | N.A. | 0 |
| SLC30A10    |  | 0,157179603  | 0 | N.A. | 0 |
| SLC30A8     |  |              | 0 | N.A. | 0 |
| SLC32A1     |  |              | 0 | N.A. | 0 |
| SLC34A1     |  | 0,063444968  | 0 | N.A. | 0 |
| SLC34A2     |  |              | 0 | N.A. | 0 |
| SLC35F1     |  | -0,159945608 | 0 | N.A. | 0 |
| SLC35F3     |  |              | 0 | N.A. | 0 |
| SLC35F4     |  |              | 0 | N.A. | 0 |
| SLC35G3     |  |              | 0 | N.A. | 0 |
| SLC35G6     |  |              | 0 | N.A. | 0 |
| SLC36A3     |  |              | 0 | N.A. | 0 |
| SLC39A12    |  |              | 0 | N.A. | 0 |
| SLC46A2     |  | 0,143789501  | 0 | N.A. | 0 |
| SLC47A2     |  |              | 0 | N.A. | 0 |
| SLC4A5      |  | 0,070301307  | 0 | N.A. | 0 |
| SLC5A10     |  |              | 0 | N.A. | 0 |

|            |  |              |   |      |   |
|------------|--|--------------|---|------|---|
| SLC5A11    |  | -0,102180935 | 0 | N.A. | 0 |
| SLC5A4     |  |              | 0 | N.A. | 0 |
| SLC5A5     |  |              | 0 | N.A. | 0 |
| SLC5A7     |  |              | 0 | N.A. | 0 |
| SLC5A8     |  | 0,035672988  | 0 | N.A. | 0 |
| SLC6A1     |  | 0,312425052  | 0 | N.A. | 0 |
| SLC6A11    |  |              | 0 | N.A. | 0 |
| SLC6A13    |  |              | 0 | N.A. | 0 |
| SLC6A17    |  |              | 0 | N.A. | 0 |
| SLC6A2     |  |              | 0 | N.A. | 0 |
| SLC6A3     |  |              | 0 | N.A. | 0 |
| SLC7A3     |  |              | 0 | N.A. | 0 |
| SLC8A1-AS1 |  |              | 0 | N.A. | 0 |
| SLC8A3     |  |              | 0 | N.A. | 0 |
| SLC9A4     |  | 0,238671282  | 0 | N.A. | 0 |
| SLC9A9     |  | -0,245427736 | 0 | N.A. | 0 |
| SLCO1A2    |  | -0,002060108 | 0 | N.A. | 0 |
| SLCO1B7    |  | 0,09102857   | 0 | N.A. | 0 |
| SLCO1C1    |  |              | 0 | N.A. | 0 |
| SLCO4C1    |  | -0,112667106 | 0 | N.A. | 0 |
| SLFN12     |  | -0,116348445 | 0 | N.A. | 0 |
| SLFN12L    |  | -0,088758096 | 0 | N.A. | 0 |
| SLIT2      |  | 0,063174968  | 0 | N.A. | 0 |
| SLIT3      |  | -0,020100757 | 0 | N.A. | 0 |
| SLITRK1    |  |              | 0 | N.A. | 0 |
| SLITRK3    |  |              | 0 | N.A. | 0 |
| SLITRK4    |  |              | 0 | N.A. | 0 |
| SMAD1-AS1  |  | 0,253088171  | 0 | N.A. | 0 |
| SMC1B      |  | 0,021220447  | 0 | N.A. | 0 |
| SMCO3      |  |              | 0 | N.A. | 0 |
| SMCR2      |  | 0,016520309  | 0 | N.A. | 0 |
| SMIM17     |  |              | 0 | N.A. | 0 |
| SMIM18     |  |              | 0 | N.A. | 0 |



|            |  |              |   |      |   |
|------------|--|--------------|---|------|---|
| SMIM2      |  |              | 0 | N.A. | 0 |
| SMLR1      |  | 0,238271556  | 0 | N.A. | 0 |
| SNAP25-AS1 |  |              | 0 | N.A. | 0 |
| SNAP91     |  |              | 0 | N.A. | 0 |
| SNCB       |  | 0,373156579  | 0 | N.A. | 0 |
| SNHG24     |  |              | 0 | N.A. | 0 |
| SNTG2      |  |              | 0 | N.A. | 0 |
| SNX31      |  | 0,068107124  | 0 | N.A. | 0 |
| SOAT2      |  | 0,043898844  | 0 | N.A. | 0 |
| SOGA3      |  |              | 0 | N.A. | 0 |
| SOHLH1     |  |              | 0 | N.A. | 0 |
| SOHLH2     |  |              | 0 | N.A. | 0 |
| SORCS1     |  |              | 0 | N.A. | 0 |
| SORCS2     |  |              | 0 | N.A. | 0 |
| SORCS3     |  |              | 0 | N.A. | 0 |
| SOST       |  |              | 0 | N.A. | 0 |
| SOX11      |  | 0,120081917  | 0 | N.A. | 0 |
| SOX21      |  |              | 0 | N.A. | 0 |
| SOX21-AS1  |  |              | 0 | N.A. | 0 |
| SP7        |  |              | 0 | N.A. | 0 |
| SPACA6P-AS |  | 0,167970965  | 0 | N.A. | 0 |
| SPAG17     |  | 0,175991341  | 0 | N.A. | 0 |
| SPAG6      |  |              | 0 | N.A. | 0 |
| SPANXN3    |  | -0,240700833 | 0 | N.A. | 0 |
| SPATA21    |  | -0,316757176 | 0 | N.A. | 0 |
| SPATA22    |  |              | 0 | N.A. | 0 |
| SPATA25    |  | -0,020118889 | 0 | N.A. | 0 |
| SPATA3-AS1 |  |              | 0 | N.A. | 0 |
| SPATA32    |  | -0,060300726 | 0 | N.A. | 0 |
| SPATA4     |  |              | 0 | N.A. | 0 |
| SPATA42    |  |              | 0 | N.A. | 0 |
| SPATA45    |  |              | 0 | N.A. | 0 |
| SPATA8     |  |              | 0 | N.A. | 0 |

|                 |  |              |   |      |   |
|-----------------|--|--------------|---|------|---|
| SPATC1          |  |              | 0 | N.A. | 0 |
| SPECC1L-ADORA2A |  |              | 0 | N.A. | 0 |
| SPEM1           |  |              | 0 | N.A. | 0 |
| SPG20-AS1       |  |              | 0 | N.A. | 0 |
| SPHKAP          |  |              | 0 | N.A. | 0 |
| SPIC            |  |              | 0 | N.A. | 0 |
| SPIN4-AS1       |  | 0,119636986  | 0 | N.A. | 0 |
| SPINK13         |  | 0,014204854  | 0 | N.A. | 0 |
| SPOCK3          |  |              | 0 | N.A. | 0 |
| SPP2            |  |              | 0 | N.A. | 0 |
| SPRN            |  |              | 0 | N.A. | 0 |
| SPRR2F          |  |              | 0 | N.A. | 0 |
| SPSB4           |  |              | 0 | N.A. | 0 |
| SPTA1           |  |              | 0 | N.A. | 0 |
| SPX             |  |              | 0 | N.A. | 0 |
| SRD5A2          |  | 0,292571474  | 0 | N.A. | 0 |
| SRGAP2-AS1      |  |              | 0 | N.A. | 0 |
| SRGAP3-AS4      |  |              | 0 | N.A. | 0 |
| SRL             |  |              | 0 | N.A. | 0 |
| SRRM4           |  |              | 0 | N.A. | 0 |
| SSBP3-AS1       |  |              | 0 | N.A. | 0 |
| SSPO            |  |              | 0 | N.A. | 0 |
| SSTR3           |  |              | 0 | N.A. | 0 |
| SSTR5           |  | 0,07310785   | 0 | N.A. | 0 |
| SSX5            |  | 0,067041463  | 0 | N.A. | 0 |
| ST3GAL5-AS1     |  | -0,080170565 | 0 | N.A. | 0 |
| ST8SIA2         |  |              | 0 | N.A. | 0 |
| ST8SIA5         |  |              | 0 | N.A. | 0 |
| STAB2           |  | 0,264286056  | 0 | N.A. | 0 |
| STAC            |  |              | 0 | N.A. | 0 |
| STAR            |  | 0,027369755  | 0 | N.A. | 0 |
| STARD6          |  | 0,176752677  | 0 | N.A. | 0 |
| STAU2-AS1       |  | 0,016298992  | 0 | N.A. | 0 |

|               |  |              |   |      |   |
|---------------|--|--------------|---|------|---|
| STEAP1B       |  |              | 0 | N.A. | 0 |
| STEAP3-AS1    |  | 0,096295576  | 0 | N.A. | 0 |
| STK32B        |  |              | 0 | N.A. | 0 |
| STMN2         |  | -0,110127447 | 0 | N.A. | 0 |
| STON1-GTF2A1L |  |              | 0 | N.A. | 0 |
| STOX2         |  | -0,146865157 | 0 | N.A. | 0 |
| STPG2         |  | -0,023499093 | 0 | N.A. | 0 |
| STT3A-AS1     |  | -0,073931452 | 0 | N.A. | 0 |
| STXBP5L       |  | 0,033170905  | 0 | N.A. | 0 |
| SUCNR1        |  |              | 0 | N.A. | 0 |
| SULT1C3       |  | -0,108009806 | 0 | N.A. | 0 |
| SUSD5         |  |              | 0 | N.A. | 0 |
| SV2B          |  |              | 0 | N.A. | 0 |
| SVEP1         |  | -0,175273273 | 0 | N.A. | 0 |
| SYCE1         |  |              | 0 | N.A. | 0 |
| SYCP2L        |  | 0,222525733  | 0 | N.A. | 0 |
| SYNDIG1       |  |              | 0 | N.A. | 0 |
| SYNDIG1L      |  | 0,294969809  | 0 | N.A. | 0 |
| SYNE1-AS1     |  |              | 0 | N.A. | 0 |
| SYNPO2        |  | 0,21227799   | 0 | N.A. | 0 |
| SYP-AS1       |  | -0,003948478 | 0 | N.A. | 0 |
| SYPL2         |  | 0,188762453  | 0 | N.A. | 0 |
| SYS1-DBNDD2   |  | -0,356418153 | 0 | N.A. | 0 |
| SYT10         |  |              | 0 | N.A. | 0 |
| SYT14         |  |              | 0 | N.A. | 0 |
| SYT16         |  |              | 0 | N.A. | 0 |
| SYT2          |  | -0,260957727 | 0 | N.A. | 0 |
| SYT3          |  |              | 0 | N.A. | 0 |
| SYT4          |  |              | 0 | N.A. | 0 |
| SYT6          |  |              | 0 | N.A. | 0 |
| SYT9          |  |              | 0 | N.A. | 0 |
| SZT2-AS1      |  | 0,342555136  | 0 | N.A. | 0 |
| T             |  |              | 0 | N.A. | 0 |

|                  |  |              |   |      |   |
|------------------|--|--------------|---|------|---|
| TAB3-AS1         |  |              | 0 | N.A. | 0 |
| TAB3-AS2         |  |              | 0 | N.A. | 0 |
| TAC4             |  |              | 0 | N.A. | 0 |
| TACR1            |  |              | 0 | N.A. | 0 |
| TAF1L            |  |              | 0 | N.A. | 0 |
| TARID            |  |              | 0 | N.A. | 0 |
| TAS2R10          |  | -0,012313719 | 0 | N.A. | 0 |
| TAS2R13          |  |              | 0 | N.A. | 0 |
| TAS2R19          |  |              | 0 | N.A. | 0 |
| TAS2R20          |  |              | 0 | N.A. | 0 |
| TAS2R31          |  | -0,037004223 | 0 | N.A. | 0 |
| TAS2R43          |  | 0,218441627  | 0 | N.A. | 0 |
| TAS2R46          |  |              | 0 | N.A. | 0 |
| TAS2R5           |  | -0,025275429 | 0 | N.A. | 0 |
| TAT              |  |              | 0 | N.A. | 0 |
| TBC1D29          |  | 0,207348597  | 0 | N.A. | 0 |
| TBC1D3C          |  | 0,394769127  | 0 | N.A. | 0 |
| TBC1D3P1-DHX40P1 |  | -0,13735241  | 0 | N.A. | 0 |
| TBL1XR1-AS1      |  | 0,156038902  | 0 | N.A. | 0 |
| TBL1Y            |  | -0,186192533 | 0 | N.A. | 0 |
| TBPL2            |  |              | 0 | N.A. | 0 |
| TBX4             |  | 0,240580767  | 0 | N.A. | 0 |
| TBX5             |  |              | 0 | N.A. | 0 |
| TBX5-AS1         |  |              | 0 | N.A. | 0 |
| TCEAL2           |  | 0,217722414  | 0 | N.A. | 0 |
| TCEAL3-AS1       |  | 0,033784266  | 0 | N.A. | 0 |
| TCEAL5           |  |              | 0 | N.A. | 0 |
| TCEAL6           |  |              | 0 | N.A. | 0 |
| TCERG1L          |  |              | 0 | N.A. | 0 |
| TCERG1L-AS1      |  |              | 0 | N.A. | 0 |
| TCF15            |  |              | 0 | N.A. | 0 |
| TCF23            |  |              | 0 | N.A. | 0 |
| TCL1B            |  |              | 0 | N.A. | 0 |

|           |  |              |   |      |   |
|-----------|--|--------------|---|------|---|
| TCP10     |  | -0,165555393 | 0 | N.A. | 0 |
| TDRD1     |  |              | 0 | N.A. | 0 |
| TDRD10    |  |              | 0 | N.A. | 0 |
| TDRD12    |  |              | 0 | N.A. | 0 |
| TDRD15    |  |              | 0 | N.A. | 0 |
| TDRD9     |  |              | 0 | N.A. | 0 |
| TECTA     |  | 0,005882012  | 0 | N.A. | 0 |
| TEK       |  | -0,140628863 | 0 | N.A. | 0 |
| TEN1      |  | -0,107750357 | 0 | N.A. | 0 |
| TENM1     |  |              | 0 | N.A. | 0 |
| TENM2     |  |              | 0 | N.A. | 0 |
| TENM3     |  | 0,255547056  | 0 | N.A. | 0 |
| TENM4     |  |              | 0 | N.A. | 0 |
| TEPP      |  |              | 0 | N.A. | 0 |
| TESC-AS1  |  |              | 0 | N.A. | 0 |
| TET2-AS1  |  |              | 0 | N.A. | 0 |
| TEX19     |  | -0,087085477 | 0 | N.A. | 0 |
| TEX26     |  | -0,025234084 | 0 | N.A. | 0 |
| TEX26-AS1 |  |              | 0 | N.A. | 0 |
| TEX28     |  |              | 0 | N.A. | 0 |
| TEX35     |  |              | 0 | N.A. | 0 |
| TEX38     |  |              | 0 | N.A. | 0 |
| TEX41     |  |              | 0 | N.A. | 0 |
| TEX43     |  | 0,031578778  | 0 | N.A. | 0 |
| TF        |  | 0,330854972  | 0 | N.A. | 0 |
| TGFB2-AS1 |  |              | 0 | N.A. | 0 |
| TGM5      |  |              | 0 | N.A. | 0 |
| TGM7      |  |              | 0 | N.A. | 0 |
| THEGL     |  |              | 0 | N.A. | 0 |
| THEM5     |  |              | 0 | N.A. | 0 |
| THPO      |  |              | 0 | N.A. | 0 |
| THRIL     |  |              | 0 | N.A. | 0 |
| THSD7B    |  |              | 0 | N.A. | 0 |

|                  |  |              |   |      |   |
|------------------|--|--------------|---|------|---|
| TICAM2           |  | 0,265803224  | 0 | N.A. | 0 |
| TIFAB            |  |              | 0 | N.A. | 0 |
| TIMD4            |  |              | 0 | N.A. | 0 |
| TISP43           |  |              | 0 | N.A. | 0 |
| TKTL2            |  | 0,100954369  | 0 | N.A. | 0 |
| TLL1             |  |              | 0 | N.A. | 0 |
| TLR7             |  | -0,027339268 | 0 | N.A. | 0 |
| TLR8             |  |              | 0 | N.A. | 0 |
| TLR8-AS1         |  |              | 0 | N.A. | 0 |
| TLX2             |  | 0,383735275  | 0 | N.A. | 0 |
| TLX3             |  | -0,084677314 | 0 | N.A. | 0 |
| TM4SF19          |  | -0,021493375 | 0 | N.A. | 0 |
| TM4SF19-TCTEX1D2 |  | 0,212035923  | 0 | N.A. | 0 |
| TMCO2            |  |              | 0 | N.A. | 0 |
| TMED7-TICAM2     |  | 0,085400064  | 0 | N.A. | 0 |
| TMEFF2           |  |              | 0 | N.A. | 0 |
| TMEM100          |  |              | 0 | N.A. | 0 |
| TMEM108          |  |              | 0 | N.A. | 0 |
| TMEM114          |  |              | 0 | N.A. | 0 |
| TMEM132E         |  |              | 0 | N.A. | 0 |
| TMEM155          |  |              | 0 | N.A. | 0 |
| TMEM169          |  | -0,211175551 | 0 | N.A. | 0 |
| TMEM190          |  | 0,093704124  | 0 | N.A. | 0 |
| TMEM200C         |  |              | 0 | N.A. | 0 |
| TMEM212          |  |              | 0 | N.A. | 0 |
| TMEM215          |  |              | 0 | N.A. | 0 |
| TMEM229A         |  |              | 0 | N.A. | 0 |
| TMEM233          |  | -0,073352714 | 0 | N.A. | 0 |
| TMEM244          |  |              | 0 | N.A. | 0 |
| TMEM246-AS1      |  |              | 0 | N.A. | 0 |
| TMEM247          |  |              | 0 | N.A. | 0 |
| TMEM255A         |  | 0,315932116  | 0 | N.A. | 0 |
| TMEM26           |  |              | 0 | N.A. | 0 |

|             |  |              |      |      |   |
|-------------|--|--------------|------|------|---|
| TMEM26-AS1  |  | 0            | N.A. | 0    |   |
| TMEM262     |  | 0,211993442  | 0    | N.A. | 0 |
| TMEM5-AS1   |  | 0            | N.A. | 0    |   |
| TMEM52B     |  | 0            | N.A. | 0    |   |
| TMEM72-AS1  |  | 0            | N.A. | 0    |   |
| TMEM78      |  | -0,083023222 | 0    | N.A. | 0 |
| TMEM8C      |  | 0            | N.A. | 0    |   |
| TMIGD1      |  | 0,272838829  | 0    | N.A. | 0 |
| TMLHE-AS1   |  | -0,031426129 | 0    | N.A. | 0 |
| TMPRSS11A   |  | 0            | N.A. | 0    |   |
| TMPRSS11B   |  | 0            | N.A. | 0    |   |
| TMPRSS12    |  | 0            | N.A. | 0    |   |
| TMX2-CTNND1 |  | 0            | N.A. | 0    |   |
| TNFAIP8L2   |  | 0,151392207  | 0    | N.A. | 0 |
| TNFRSF8     |  | 0            | N.A. | 0    |   |
| TNFSF18     |  | 0            | N.A. | 0    |   |
| TNNT3       |  | 0            | N.A. | 0    |   |
| TNR         |  | 0            | N.A. | 0    |   |
| TP53TG3D    |  | 0            | N.A. | 0    |   |
| TP63        |  | 0            | N.A. | 0    |   |
| TP73-AS1    |  | 0            | N.A. | 0    |   |
| TPBGL       |  | 0            | N.A. | 0    |   |
| TPH2        |  | -0,001750179 | 0    | N.A. | 0 |
| TPPP2       |  | -0,188003524 | 0    | N.A. | 0 |
| TPRG1-AS1   |  | 0,009364661  | 0    | N.A. | 0 |
| TPSD1       |  | 0            | N.A. | 0    |   |
| TRAPPC3L    |  | 0,314760534  | 0    | N.A. | 0 |
| TRAV1-1     |  | 0            | N.A. | 0    |   |
| TRAV1-2     |  | 0            | N.A. | 0    |   |
| TRAV10      |  | 0            | N.A. | 0    |   |
| TRAV11      |  | 0            | N.A. | 0    |   |
| TRAV12-1    |  | 0            | N.A. | 0    |   |
| TRAV12-2    |  | -0,088758096 | 0    | N.A. | 0 |

|             |  |              |   |      |   |
|-------------|--|--------------|---|------|---|
| TRAV12-3    |  |              | 0 | N.A. | 0 |
| TRAV13-1    |  |              | 0 | N.A. | 0 |
| TRAV13-2    |  | -0,081466483 | 0 | N.A. | 0 |
| TRAV14DV4   |  |              | 0 | N.A. | 0 |
| TRAV16      |  |              | 0 | N.A. | 0 |
| TRAV17      |  |              | 0 | N.A. | 0 |
| TRAV18      |  |              | 0 | N.A. | 0 |
| TRAV19      |  |              | 0 | N.A. | 0 |
| TRAV2       |  |              | 0 | N.A. | 0 |
| TRAV20      |  |              | 0 | N.A. | 0 |
| TRAV21      |  |              | 0 | N.A. | 0 |
| TRAV22      |  |              | 0 | N.A. | 0 |
| TRAV23DV6   |  |              | 0 | N.A. | 0 |
| TRAV24      |  |              | 0 | N.A. | 0 |
| TRAV25      |  |              | 0 | N.A. | 0 |
| TRAV26-1    |  |              | 0 | N.A. | 0 |
| TRAV26-2    |  |              | 0 | N.A. | 0 |
| TRAV27      |  |              | 0 | N.A. | 0 |
| TRAV29DV5   |  |              | 0 | N.A. | 0 |
| TRAV3       |  |              | 0 | N.A. | 0 |
| TRAV30      |  | -0,087163387 | 0 | N.A. | 0 |
| TRAV33      |  | 0,201319142  | 0 | N.A. | 0 |
| TRAV34      |  |              | 0 | N.A. | 0 |
| TRAV35      |  |              | 0 | N.A. | 0 |
| TRAV36DV7   |  | -0,225163244 | 0 | N.A. | 0 |
| TRAV38-1    |  | 0,136022464  | 0 | N.A. | 0 |
| TRAV38-2DV8 |  | 0,152179561  | 0 | N.A. | 0 |
| TRAV4       |  |              | 0 | N.A. | 0 |
| TRAV40      |  |              | 0 | N.A. | 0 |
| TRAV41      |  | 0,243316397  | 0 | N.A. | 0 |
| TRAV5       |  |              | 0 | N.A. | 0 |
| TRAV6       |  |              | 0 | N.A. | 0 |
| TRAV8-1     |  |              | 0 | N.A. | 0 |



|             |  |              |   |      |   |
|-------------|--|--------------|---|------|---|
| TRAV8-2     |  |              | 0 | N.A. | 0 |
| TRAV8-3     |  |              | 0 | N.A. | 0 |
| TRAV8-4     |  |              | 0 | N.A. | 0 |
| TRAV8-5     |  |              | 0 | N.A. | 0 |
| TRAV8-6     |  |              | 0 | N.A. | 0 |
| TRAV9-2     |  |              | 0 | N.A. | 0 |
| TRBV10-1    |  |              | 0 | N.A. | 0 |
| TRBV10-3    |  | -0,088758096 | 0 | N.A. | 0 |
| TRBV11-2    |  |              | 0 | N.A. | 0 |
| TRBV11-3    |  |              | 0 | N.A. | 0 |
| TRBV12-3    |  |              | 0 | N.A. | 0 |
| TRBV12-4    |  |              | 0 | N.A. | 0 |
| TRBV13      |  |              | 0 | N.A. | 0 |
| TRBV14      |  |              | 0 | N.A. | 0 |
| TRBV15      |  |              | 0 | N.A. | 0 |
| TRBV16      |  |              | 0 | N.A. | 0 |
| TRBV18      |  |              | 0 | N.A. | 0 |
| TRBV19      |  |              | 0 | N.A. | 0 |
| TRBV2       |  |              | 0 | N.A. | 0 |
| TRBV20-1    |  | -0,029872433 | 0 | N.A. | 0 |
| TRBV21-1    |  |              | 0 | N.A. | 0 |
| TRBV23-1    |  |              | 0 | N.A. | 0 |
| TRBV24-1    |  |              | 0 | N.A. | 0 |
| TRBV27      |  |              | 0 | N.A. | 0 |
| TRBV28      |  |              | 0 | N.A. | 0 |
| TRBV29-1    |  |              | 0 | N.A. | 0 |
| TRBV29OR9-2 |  |              | 0 | N.A. | 0 |
| TRBV3-1     |  |              | 0 | N.A. | 0 |
| TRBV30      |  |              | 0 | N.A. | 0 |
| TRBV4-1     |  |              | 0 | N.A. | 0 |
| TRBV4-2     |  |              | 0 | N.A. | 0 |
| TRBV5-1     |  |              | 0 | N.A. | 0 |
| TRBV5-3     |  |              | 0 | N.A. | 0 |

|         |  |              |   |      |   |
|---------|--|--------------|---|------|---|
| TRBV5-4 |  |              | 0 | N.A. | 0 |
| TRBV5-6 |  |              | 0 | N.A. | 0 |
| TRBV5-7 |  |              | 0 | N.A. | 0 |
| TRBV6-1 |  |              | 0 | N.A. | 0 |
| TRBV6-5 |  |              | 0 | N.A. | 0 |
| TRBV6-8 |  |              | 0 | N.A. | 0 |
| TRBV7-3 |  | 0,058015713  | 0 | N.A. | 0 |
| TRBV7-4 |  |              | 0 | N.A. | 0 |
| TRBV7-6 |  |              | 0 | N.A. | 0 |
| TRBV7-7 |  |              | 0 | N.A. | 0 |
| TRBV7-9 |  |              | 0 | N.A. | 0 |
| TRBV9   |  |              | 0 | N.A. | 0 |
| TRBVB   |  |              | 0 | N.A. | 0 |
| TRDN    |  | 0,272093854  | 0 | N.A. | 0 |
| TRDV1   |  |              | 0 | N.A. | 0 |
| TRDV2   |  |              | 0 | N.A. | 0 |
| TRDV3   |  |              | 0 | N.A. | 0 |
| TREML1  |  |              | 0 | N.A. | 0 |
| TREML4  |  |              | 0 | N.A. | 0 |
| TRERNA1 |  | 0,142027372  | 0 | N.A. | 0 |
| TREX2   |  | -0,102934901 | 0 | N.A. | 0 |
| TRG-AS1 |  |              | 0 | N.A. | 0 |
| TRGV11  |  |              | 0 | N.A. | 0 |
| TRGV2   |  |              | 0 | N.A. | 0 |
| TRGV3   |  |              | 0 | N.A. | 0 |
| TRGV4   |  |              | 0 | N.A. | 0 |
| TRGV6   |  |              | 0 | N.A. | 0 |
| TRGV7   |  |              | 0 | N.A. | 0 |
| TRGV8   |  |              | 0 | N.A. | 0 |
| TRGV9   |  |              | 0 | N.A. | 0 |
| TRH     |  |              | 0 | N.A. | 0 |
| TRIM17  |  |              | 0 | N.A. | 0 |
| TRIM34  |  | 0,134810663  | 0 | N.A. | 0 |

|           |  |              |   |      |   |
|-----------|--|--------------|---|------|---|
| TRIM50    |  |              | 0 | N.A. | 0 |
| TRIM55    |  |              | 0 | N.A. | 0 |
| TRIM6     |  |              | 0 | N.A. | 0 |
| TRIM61    |  | -0,249101905 | 0 | N.A. | 0 |
| TRIM63    |  |              | 0 | N.A. | 0 |
| TRIM67    |  |              | 0 | N.A. | 0 |
| TRIM71    |  |              | 0 | N.A. | 0 |
| TRIM74    |  | 0,141239978  | 0 | N.A. | 0 |
| TRIML2    |  |              | 0 | N.A. | 0 |
| TRO       |  |              | 0 | N.A. | 0 |
| TRPC3     |  |              | 0 | N.A. | 0 |
| TRPC50S   |  | 0,285224053  | 0 | N.A. | 0 |
| TRPC6     |  |              | 0 | N.A. | 0 |
| TRPM1     |  |              | 0 | N.A. | 0 |
| TRPM8     |  | 0,03119994   | 0 | N.A. | 0 |
| TRPV5     |  | 0,164490215  | 0 | N.A. | 0 |
| TSGA10IP  |  |              | 0 | N.A. | 0 |
| TSGA13    |  |              | 0 | N.A. | 0 |
| TSHR      |  | -0,236901237 | 0 | N.A. | 0 |
| TSKS      |  |              | 0 | N.A. | 0 |
| TSPAN11   |  |              | 0 | N.A. | 0 |
| TSPAN16   |  |              | 0 | N.A. | 0 |
| TSPAN19   |  | 0,271802512  | 0 | N.A. | 0 |
| TSSK1B    |  |              | 0 | N.A. | 0 |
| TSSK4     |  | 0,078334459  | 0 | N.A. | 0 |
| TTC23L    |  | -0,032524591 | 0 | N.A. | 0 |
| TTC24     |  |              | 0 | N.A. | 0 |
| TLL10-AS1 |  |              | 0 | N.A. | 0 |
| TLL11-IT1 |  | -0,071246    | 0 | N.A. | 0 |
| TLL9      |  | 0,285607377  | 0 | N.A. | 0 |
| TTY10     |  |              | 0 | N.A. | 0 |
| TUB       |  | -0,097966469 | 0 | N.A. | 0 |
| TUBA3D    |  |              | 0 | N.A. | 0 |

|            |  |              |   |      |   |
|------------|--|--------------|---|------|---|
| TUBA4B     |  |              | 0 | N.A. | 0 |
| TUBB8      |  | 0,301868235  | 0 | N.A. | 0 |
| TULP1      |  |              | 0 | N.A. | 0 |
| TULP2      |  |              | 0 | N.A. | 0 |
| TUNAR      |  |              | 0 | N.A. | 0 |
| TUSC5      |  |              | 0 | N.A. | 0 |
| TXNDC2     |  |              | 0 | N.A. | 0 |
| U51244.2   |  | -0,021494531 | 0 | N.A. | 0 |
| U52111.14  |  | -0,09943123  | 0 | N.A. | 0 |
| U82695.9   |  |              | 0 | N.A. | 0 |
| U91324.1   |  |              | 0 | N.A. | 0 |
| U91328.21  |  |              | 0 | N.A. | 0 |
| U91328.22  |  | 0,075381666  | 0 | N.A. | 0 |
| UBE2E1-AS1 |  | -0,120898451 | 0 | N.A. | 0 |
| UBE2E2-AS1 |  |              | 0 | N.A. | 0 |
| UBE2Q1-AS1 |  |              | 0 | N.A. | 0 |
| UBE2Q2L    |  |              | 0 | N.A. | 0 |
| UBE2U      |  |              | 0 | N.A. | 0 |
| UCP1       |  |              | 0 | N.A. | 0 |
| UFL1-AS1   |  | -0,016092559 | 0 | N.A. | 0 |
| UG0898H09  |  | 0,001658786  | 0 | N.A. | 0 |
| UGT1A10    |  | -0,042508007 | 0 | N.A. | 0 |
| UGT1A6     |  |              | 0 | N.A. | 0 |
| UGT1A7     |  | 0,276829026  | 0 | N.A. | 0 |
| UGT1A8     |  | -0,064556059 | 0 | N.A. | 0 |
| UGT3A2     |  | -0,099084565 | 0 | N.A. | 0 |
| UNC13C     |  | -0,057449403 | 0 | N.A. | 0 |
| UNC45B     |  |              | 0 | N.A. | 0 |
| UNC5C      |  |              | 0 | N.A. | 0 |
| UNC5D      |  |              | 0 | N.A. | 0 |
| UNC80      |  |              | 0 | N.A. | 0 |
| UPB1       |  |              | 0 | N.A. | 0 |
| UPK1A      |  |              | 0 | N.A. | 0 |

|            |  |              |   |      |   |
|------------|--|--------------|---|------|---|
| UPK1A-AS1  |  |              | 0 | N.A. | 0 |
| USH2A      |  | 0,014722007  | 0 | N.A. | 0 |
| USP12-AS1  |  |              | 0 | N.A. | 0 |
| USP12-AS2  |  |              | 0 | N.A. | 0 |
| USP29      |  |              | 0 | N.A. | 0 |
| USP50      |  |              | 0 | N.A. | 0 |
| UST        |  | -0,061197777 | 0 | N.A. | 0 |
| UTF1       |  |              | 0 | N.A. | 0 |
| UTS2B      |  | -0,154530481 | 0 | N.A. | 0 |
| VAC14-AS1  |  | 0,275972871  | 0 | N.A. | 0 |
| VAT1L      |  |              | 0 | N.A. | 0 |
| VAV3-AS1   |  |              | 0 | N.A. | 0 |
| VAX2       |  |              | 0 | N.A. | 0 |
| VCX3B      |  | -0,094981875 | 0 | N.A. | 0 |
| VEGFC      |  | -0,021037317 | 0 | N.A. | 0 |
| VGLL2      |  |              | 0 | N.A. | 0 |
| VIP        |  |              | 0 | N.A. | 0 |
| VIPR1-AS1  |  | 0,002728852  | 0 | N.A. | 0 |
| VIT        |  | 0,192628106  | 0 | N.A. | 0 |
| VN1R1      |  |              | 0 | N.A. | 0 |
| VN1R2      |  | -0,09118431  | 0 | N.A. | 0 |
| VPREB1     |  |              | 0 | N.A. | 0 |
| VPS13A-AS1 |  |              | 0 | N.A. | 0 |
| VRTN       |  | 0,014333731  | 0 | N.A. | 0 |
| VSTM1      |  |              | 0 | N.A. | 0 |
| VSTM2A     |  | -0,009828198 | 0 | N.A. | 0 |
| VWA3B      |  | -0,297876844 | 0 | N.A. | 0 |
| VWA5B1     |  | 0,063417205  | 0 | N.A. | 0 |
| VWA8-AS1   |  | -0,153404062 | 0 | N.A. | 0 |
| VWC2       |  |              | 0 | N.A. | 0 |
| WARS2-IT1  |  |              | 0 | N.A. | 0 |
| WASF3-AS1  |  |              | 0 | N.A. | 0 |
| WASIR1     |  |              | 0 | N.A. | 0 |

|                    |  |              |   |      |   |
|--------------------|--|--------------|---|------|---|
| WDR17              |  |              | 0 | N.A. | 0 |
| WDR38              |  | 0,046907151  | 0 | N.A. | 0 |
| WDR49              |  |              | 0 | N.A. | 0 |
| WDR64              |  | -0,025057886 | 0 | N.A. | 0 |
| WDR86              |  |              | 0 | N.A. | 0 |
| WDR88              |  |              | 0 | N.A. | 0 |
| WEE2               |  |              | 0 | N.A. | 0 |
| WFDC10A            |  | 0,259901402  | 0 | N.A. | 0 |
| WFDC11             |  | 0,093276329  | 0 | N.A. | 0 |
| WFDC6              |  |              | 0 | N.A. | 0 |
| WFDC9              |  | -0,081836753 | 0 | N.A. | 0 |
| WFIKKN2            |  | -0,025234084 | 0 | N.A. | 0 |
| WI2-1959D15.1      |  |              | 0 | N.A. | 0 |
| WI2-80269A6.1      |  |              | 0 | N.A. | 0 |
| WNK3               |  |              | 0 | N.A. | 0 |
| WNT1               |  |              | 0 | N.A. | 0 |
| WNT16              |  |              | 0 | N.A. | 0 |
| WNT2               |  | 0,038478195  | 0 | N.A. | 0 |
| WNT3A              |  |              | 0 | N.A. | 0 |
| WNT5A-AS1          |  |              | 0 | N.A. | 0 |
| WNT9B              |  |              | 0 | N.A. | 0 |
| WSCD2              |  |              | 0 | N.A. | 0 |
| WT1-AS             |  |              | 0 | N.A. | 0 |
| WWC3-AS1           |  |              | 0 | N.A. | 0 |
| XAGE3              |  | -0,220082512 | 0 | N.A. | 0 |
| XIAP-AS1           |  |              | 0 | N.A. | 0 |
| XIRP1              |  | 0,196335573  | 0 | N.A. | 0 |
| XIRP2              |  | 0,075400901  | 0 | N.A. | 0 |
| XX-C00717C00720L.1 |  |              | 0 | N.A. | 0 |
| XX-C283C717.1      |  |              | 0 | N.A. | 0 |
| XX-CR54.1          |  |              | 0 | N.A. | 0 |
| XX-FW83128A1.2     |  | -0,004232293 | 0 | N.A. | 0 |
| XXbac-B33L19.12    |  | -0,231788321 | 0 | N.A. | 0 |

|                     |              |   |      |   |
|---------------------|--------------|---|------|---|
| XXbac-B33L19.4      |              | 0 | N.A. | 0 |
| XXbac-B444P24.8     | 0,000112058  | 0 | N.A. | 0 |
| XXbac-BPG13B8.10    |              | 0 | N.A. | 0 |
| XXbac-BPG181M17.6   |              | 0 | N.A. | 0 |
| XXbac-BPG249D20.9   | 0,114314435  | 0 | N.A. | 0 |
| XXbac-BPGBPG55C20.3 |              | 0 | N.A. | 0 |
| XXyac-YM21GA2.7     |              | 0 | N.A. | 0 |
| XXyac-YR29IB3.1     |              | 0 | N.A. | 0 |
| XXyac-YX155B6.5     | 0,284263809  | 0 | N.A. | 0 |
| XXYL1-AS1           |              | 0 | N.A. | 0 |
| YEATS2-AS1          | 0,082587823  | 0 | N.A. | 0 |
| YIPF7               |              | 0 | N.A. | 0 |
| Z69666.2            | -0,119640818 | 0 | N.A. | 0 |
| Z83001.1            |              | 0 | N.A. | 0 |
| Z99756.1            |              | 0 | N.A. | 0 |
| ZAR1                |              | 0 | N.A. | 0 |
| ZBBX                | -0,16424845  | 0 | N.A. | 0 |
| ZBTB12              | 0,062238835  | 0 | N.A. | 0 |
| ZBTB16              |              | 0 | N.A. | 0 |
| ZBTB20-AS1          |              | 0 | N.A. | 0 |
| ZBTB20-AS3          |              | 0 | N.A. | 0 |
| ZBTB8B              |              | 0 | N.A. | 0 |
| ZCCHC5              |              | 0 | N.A. | 0 |
| ZDHC15              |              | 0 | N.A. | 0 |
| ZDHC19              |              | 0 | N.A. | 0 |
| ZFH4-AS1            |              | 0 | N.A. | 0 |
| ZFP42               |              | 0 | N.A. | 0 |
| ZFP92               |              | 0 | N.A. | 0 |
| ZFR2                |              | 0 | N.A. | 0 |
| ZFY-AS1             | 0,383735275  | 0 | N.A. | 0 |
| ZIC4                |              | 0 | N.A. | 0 |
| ZIK1                | -0,0220966   | 0 | N.A. | 0 |
| ZIM2                | -0,056663581 | 0 | N.A. | 0 |

|               |  |              |   |      |   |
|---------------|--|--------------|---|------|---|
| ZIM2-AS1      |  |              | 0 | N.A. | 0 |
| ZIM3          |  |              | 0 | N.A. | 0 |
| ZMAT4         |  |              | 0 | N.A. | 0 |
| ZMYM4-AS1     |  | -0,16210987  | 0 | N.A. | 0 |
| ZMYM6NB       |  | 0,071583608  | 0 | N.A. | 0 |
| ZNF132        |  | -0,225163244 | 0 | N.A. | 0 |
| ZNF135        |  |              | 0 | N.A. | 0 |
| ZNF154        |  |              | 0 | N.A. | 0 |
| ZNF157        |  |              | 0 | N.A. | 0 |
| ZNF197-AS1    |  |              | 0 | N.A. | 0 |
| ZNF208        |  |              | 0 | N.A. | 0 |
| ZNF221        |  | 0,245616325  | 0 | N.A. | 0 |
| ZNF229        |  | -0,086157723 | 0 | N.A. | 0 |
| ZNF295-AS1    |  | 0,100954369  | 0 | N.A. | 0 |
| ZNF30-AS1     |  |              | 0 | N.A. | 0 |
| ZNF32-AS1     |  | -0,045646278 | 0 | N.A. | 0 |
| ZNF32-AS2     |  | -0,094078587 | 0 | N.A. | 0 |
| ZNF350-AS1    |  |              | 0 | N.A. | 0 |
| ZNF354C       |  |              | 0 | N.A. | 0 |
| ZNF366        |  | -0,097593405 | 0 | N.A. | 0 |
| ZNF382        |  | -0,092677992 | 0 | N.A. | 0 |
| ZNF385B       |  |              | 0 | N.A. | 0 |
| ZNF418        |  |              | 0 | N.A. | 0 |
| ZNF474        |  |              | 0 | N.A. | 0 |
| ZNF536        |  |              | 0 | N.A. | 0 |
| ZNF559-ZNF177 |  |              | 0 | N.A. | 0 |
| ZNF560        |  |              | 0 | N.A. | 0 |
| ZNF582-AS1    |  |              | 0 | N.A. | 0 |
| ZNF625-ZNF20  |  |              | 0 | N.A. | 0 |
| ZNF649-AS1    |  |              | 0 | N.A. | 0 |
| ZNF667        |  | -0,025850064 | 0 | N.A. | 0 |
| ZNF667-AS1    |  | 0,029062871  | 0 | N.A. | 0 |
| ZNF676        |  | -0,216067753 | 0 | N.A. | 0 |



|            |  |              |   |      |   |
|------------|--|--------------|---|------|---|
| ZNF705A    |  |              | 0 | N.A. | 0 |
| ZNF705G    |  | 0,009265806  | 0 | N.A. | 0 |
| ZNF716     |  | 0,337693264  | 0 | N.A. | 0 |
| ZNF727     |  | -0,234497338 | 0 | N.A. | 0 |
| ZNF732     |  | -0,086310764 | 0 | N.A. | 0 |
| ZNF781     |  |              | 0 | N.A. | 0 |
| ZNF790-AS1 |  | 0,081138471  | 0 | N.A. | 0 |
| ZNF804A    |  | -0,154574615 | 0 | N.A. | 0 |
| ZNF812     |  |              | 0 | N.A. | 0 |
| ZNF829     |  |              | 0 | N.A. | 0 |
| ZNF831     |  | 0,136022464  | 0 | N.A. | 0 |
| ZNF835     |  |              | 0 | N.A. | 0 |
| ZNF888     |  | -0,043498837 | 0 | N.A. | 0 |
| ZNF98      |  |              | 0 | N.A. | 0 |
| ZNF99      |  |              | 0 | N.A. | 0 |
| ZP1        |  | 0,14117977   | 0 | N.A. | 0 |
| ZPBP       |  |              | 0 | N.A. | 0 |
| ZPBP2      |  |              | 0 | N.A. | 0 |
| ZRANB2-AS1 |  |              | 0 | N.A. | 0 |
| ZSCAN1     |  |              | 0 | N.A. | 0 |
| ZSCAN23    |  |              | 0 | N.A. | 0 |
| ZSCAN4     |  | -0,057605904 | 0 | N.A. | 0 |
| ZSCAN5B    |  |              | 0 | N.A. | 0 |
| ZSWIM2     |  |              | 0 | N.A. | 0 |
| ZYG11A     |  |              | 0 | N.A. | 0 |

**Supplementary Table 3.** Correlation of basal pancreatic genes with Ep

| <b>gene</b> | <b>Mean_SMC_Cohort</b> | <b>Mean_KUL_Cohort</b> |
|-------------|------------------------|------------------------|
| EMP1        | 0,869356026            | 0,853861678            |
| ITGA3       | 0,76369857             | 0,922465825            |
| AHNAK2      | 0,720598585            | 0,794526483            |
| SLC2A1      | 0,711780311            | 0,850531314            |
| KRT19       | 0,662218606            | 0,839990568            |
| KRT7        | 0,62052748             | 0,49344304             |
| CAST        | 0,603443421            | 0,72383654             |
| DHRS9       | 0,577439569            | 0,62814721             |
| ANXA1       | 0,577071676            | 0,335263196            |
| F3          | 0,504995258            | 0,75042491             |
| KRT15       | 0,504451152            | 0,432809164            |
| S100A2      | 0,498329069            | 0,354499252            |
| KRT17       | 0,493230731            | 0,568491862            |
| SCEL        | 0,473439109            | 0,631357019            |
| SPRR1B      | 0,469394784            | 0,452490938            |
| ANXA2       | 0,448203252            | 0,452065675            |
| SEMA3C      | 0,436193003            | 0,309821044            |
| LY6D        | 0,406274892            | 0,336809208            |
| CAP1        | 0,369989178            | 0,504539576            |
| KRT6A       | 0,348487892            | 0,538086096            |
| CAV1        | 0,333017431            | 0,000136606            |
| GPR87       | 0,332369568            | 0,260654866            |
| CD109       | 0,33109085             | 0,521307369            |
| CST6        | 0,328104392            | 0,415487183            |
| FAM83A      | 0,297027805            | 0,110919615            |
| FLNA        | 0,2863217              | 0,281339764            |
| GJB5        | 0,163833734            | 0,570084996            |
| KRT13       | 0,154437221            | 0,124386989            |
| DDIT4       | 0,153804183            | 0,625657038            |
| PTPN13      | 0,141352241            | 0,129005636            |
| KRT5        | 0,136223892            |                        |
| COL7A1      | 0,041286735            | 0,277151037            |
| PKP1        | 0,025231937            | 0,305685037            |
| FRMD6       | 0,023146377            | 0,143794203            |
| SLITRK6     | 0,014825454            | 0,02057934             |
| AQP3        | -0,005496947           | 0,03482334             |
| MTSS1       | -0,02568104            | -0,052508472           |
| CSTA        | -0,047702527           | -0,245026463           |
| MT2A        | -0,066201053           | -0,20710425            |
| PVRL1       | -0,0977537             | -0,071148221           |
| YBX3        | -0,184074128           | -0,025807553           |
| CD44        | -0,18524605            | -0,321441415           |
| GAPDH       | -0,324296261           | -0,275150248           |
| HSP90AA1    | -0,615830604           | -0,088997784           |
| LDHB        | -0,702396149           | -0,6815864             |

descriptives by dataset

Descriptives of clinical info by dataset

|                                       |               | TCGA<br>(538)  | GSE38832<br>(122) | GSE44076<br>(98) | GSE33113<br>(90) | GSE14333<br>(290) | GSE39582<br>(562) | GSE37892<br>(130) | TOTAL<br>(1830) |
|---------------------------------------|---------------|----------------|-------------------|------------------|------------------|-------------------|-------------------|-------------------|-----------------|
| Gender                                | Male          | 280<br>(52.0%) |                   | 71<br>(72.4%)    | 42<br>(46.7%)    | 164<br>(56.6%)    | 307<br>(54.6%)    | 69<br>(53.1%)     | 933<br>(54.6%)  |
|                                       | Female        | 258<br>(48.0%) |                   | 27<br>(27.6%)    | 48<br>(53.3%)    | 126<br>(43.4%)    | 255<br>(45.4%)    | 61<br>(46.9%)     | 775<br>(45.4%)  |
|                                       | Miss.         | 0<br>(0.0%)    | 122<br>(100.0%)   | 0<br>(0.0%)      | 0<br>(0.0%)      | 0<br>(0.0%)       | 0<br>(0.0%)       | 0<br>(0.0%)       | 122<br>(6.7%)   |
| Age at diagnosis                      | Mean (Sd)     | 65.36 (12.87)  |                   | 70.54 (9.02)     | 70.39 (12.95)    | 65.96 (12.52)     | 66.84 (13.28)     | 68.25 (12.69)     | 66.73 (12.83)   |
|                                       | Miss.         | 0 (0.0%)       | 122 (100.0%)      | 0 (0.0%)         | 1 (1.1%)         | 0 (0.0%)          | 1 (0.2%)          | 0 (0.0%)          | 124 (6.8%)      |
| Tumor location                        | Right         | 191<br>(41.9%) |                   | 38<br>(38.8%)    |                  | 125<br>(43.7%)    | 222<br>(39.5%)    | 57<br>(44.2%)     | 633<br>(41.3%)  |
|                                       | Left          | 117<br>(25.7%) |                   | 60<br>(61.2%)    |                  | 122<br>(42.7%)    | 340<br>(60.5%)    | 72<br>(55.8%)     | 711<br>(46.4%)  |
|                                       | Rectum        | 148<br>(32.5%) |                   | 0<br>(0.0%)      |                  | 39<br>(13.6%)     | 0<br>(0.0%)       | 0<br>(0.0%)       | 187<br>(12.2%)  |
|                                       | Miss.         | 82<br>(15.2%)  | 122<br>(100.0%)   | 0<br>(0.0%)      | 90<br>(100.0%)   | 4<br>(1.4%)       | 0<br>(0.0%)       | 1<br>(0.8%)       | 299<br>(16.3%)  |
| Stage                                 | Stage I       | 93<br>(17.9%)  | 18<br>(14.8%)     | 0<br>(0.0%)      | 0<br>(0.0%)      | 44<br>(15.2%)     | 33<br>(5.9%)      | 0<br>(0.0%)       | 188<br>(10.4%)  |
|                                       | Stage II      | 198<br>(38.1%) | 35<br>(28.7%)     | 98<br>(100.0%)   | 90<br>(100.0%)   | 94<br>(32.4%)     | 264<br>(47.0%)    | 73<br>(56.2%)     | 852<br>(47.0%)  |
|                                       | Stage III     | 157<br>(30.2%) | 39<br>(32.0%)     | 0<br>(0.0%)      | 0<br>(0.0%)      | 91<br>(31.4%)     | 205<br>(36.5%)    | 57<br>(43.8%)     | 549<br>(30.3%)  |
|                                       | Stage IV      | 72<br>(13.8%)  | 30<br>(24.6%)     | 0<br>(0.0%)      | 0<br>(0.0%)      | 61<br>(21.0%)     | 60<br>(10.7%)     | 0<br>(0.0%)       | 223<br>(12.3%)  |
|                                       | Miss.         | 18<br>(3.3%)   | 0<br>(0.0%)       | 0<br>(0.0%)      | 0<br>(0.0%)      | 0<br>(0.0%)       | 0<br>(0.0%)       | 0<br>(0.0%)       | 18<br>(1.0%)    |
| MSI status                            | MSS           | 462<br>(85.9%) | 99<br>(81.1%)     | 98<br>(100.0%)   | 61<br>(67.8%)    | 240<br>(82.8%)    | 483<br>(85.9%)    | 130<br>(100.0%)   | 1573<br>(86.0%) |
|                                       | MSI           | 76<br>(14.1%)  | 23<br>(18.9%)     | 0<br>(0.0%)      | 29<br>(32.2%)    | 50<br>(17.2%)     | 79<br>(14.1%)     | 0<br>(0.0%)       | 257<br>(14.0%)  |
| Time of follow-up (years, not events) | Median (MAD)  | 1.63 (1.28)    | 3.34 (2.44)       |                  | 3.64 (1.62)      | 3.96 (2.22)       | 5.33 (2.72)       | 4.17 (1.45)       | 3.83 (2.85)     |
| Recurrence                            | No recurrence | 214<br>(53.4%) | 89<br>(96.7%)     |                  | 71<br>(79.8%)    | 176<br>(77.9%)    | 353<br>(71.6%)    | 93<br>(71.5%)     | 996<br>(69.6%)  |
|                                       | Recurrence    | 187<br>(46.6%) | 3<br>(3.3%)       |                  | 18<br>(20.2%)    | 50<br>(22.1%)     | 140<br>(28.4%)    | 37<br>(28.5%)     | 435<br>(30.4%)  |
|                                       | Miss.         | 137<br>(25.5%) | 30<br>(24.6%)     | 98<br>(100.0%)   | 1<br>(1.1%)      | 64<br>(22.1%)     | 69<br>(12.3%)     | 0<br>(0.0%)       | 399<br>(21.8%)  |

**Supplementary Table 4.** Functional enrichment of cell population across metastatic relapse

|                                    | HRCs Krt20- | HRCs     | Krt20+   | Lgr5+ Ki67+ | Lgr5+ Ki67- | Ki67+      |
|------------------------------------|-------------|----------|----------|-------------|-------------|------------|
| HALLMARK_HYPOXIA                   | 30,77551    | 28,51489 | 24,49159 | 0,00000953  | 0,365992236 | 0,00000013 |
| HALLMARK_INTERFERON_GAMMA_RESPON   | 27,24515    | 0,11966  | 2,392422 | 1,96519     | 7,252677237 | 10,05199   |
| HALLMARK_INTERFERON_ALPHA_RESPONS  | 27,08662    | 0,401881 | 3,995807 | 0,319878    | 2,933395069 | 8,80403    |
| HALLMARK_PROTEIN_SECRETION         | 22,67438    | 15,56462 | 10,9052  | 3,123357    | 4,558567337 | 0,772295   |
| HALLMARK_P53_PATHWAY               | 18,93139    | 25,27526 | 17,88514 | 1,778619    | 2,870020336 | 0,645644   |
| HALLMARK_TNFA_SIGNALING_VIA_NFKB   | 16,59663    | 16,20497 | 13,53301 | 1,703204    | 3,2177386   | 0,00000013 |
| HALLMARK_MTORC1_SIGNALING          | 14,88045    | 6,63137  | 4,64339  | 21,25053    | 7,277966985 | 24,52802   |
| HALLMARK_HEME_METABOLISM           | 11,34406    | 16,20497 | 4,674632 | 5,592432    | 5,311753414 | 0,645644   |
| HALLMARK_PI3K_AKT_MTOR_SIGNALING   | 11,27813    | 6,387765 | 1,453124 | 7,845002    | 2,701581061 | 5,015559   |
| HALLMARK_APOPTOSIS                 | 10,80282    | 9,180745 | 11,42646 | 1,4938      | 0,987132255 | 0,570294   |
| HALLMARK_GLYCOLYSIS                | 9,019813    | 4,354255 | 14,36281 | 7,590663    | 6,126240202 | 4,014588   |
| HALLMARK_CHOLESTEROL_HOMEOSTASIS   | 8,625716    | 4,585903 | 6,37011  | 2,994341    | 2,526837643 | 4,361533   |
| HALLMARK_ESTROGEN_RESPONSE_EARLY   | 8,557877    | 10,28148 | 12,46381 | 5,03259     | 4,740939108 | 0,098036   |
| HALLMARK_MITOTIC_SPINDLE           | 7,668918    | 7,230265 | 3,552531 | 20,55275    | 8,059405272 | 17,07332   |
| HALLMARK_IL6_JAK_STAT3_SIGNALING   | 7,668918    | 3,331595 | 2,237264 | 0,535035    | 1,959874483 | 0,00000013 |
| HALLMARK_TGF_BETA_SIGNALING        | 7,042241    | 16,20497 | 11,69304 | 0,660831    | 1,353016091 | 0,09087    |
| HALLMARK_IL2_STAT5_SIGNALING       | 6,645344    | 5,213776 | 9,269553 | 0,98998     | 1,485501807 | 0,922308   |
| HALLMARK_COMPLEMENT                | 6,368495    | 3,695182 | 6,340621 | 0,606537    | 0,922220161 | 0,00000013 |
| HALLMARK_UV_RESPONSE_UP            | 5,505433    | 5,397965 | 2,934072 | 10,0022     | 3,877119378 | 6,020873   |
| HALLMARK_ADIPOGENESIS              | 5,249682    | 2,868029 | 5,259809 | 17,30318    | 24,36033264 | 10,76306   |
| HALLMARK_INFLAMMATORY_RESPONSE     | 4,4299      | 1,400033 | 1,684921 | 0,14728     | 0,392267326 | 0,00000013 |
| HALLMARK_PEROXISOME                | 4,055169    | 0,366073 | 3,756669 | 5,055622    | 3,205736293 | 2,362712   |
| HALLMARK_ESTROGEN_RESPONSE_LATE    | 3,951758    | 5,748746 | 6,813605 | 5,728767    | 1,618858153 | 0,911483   |
| HALLMARK_UV_RESPONSE_DN            | 3,903646    | 8,424758 | 6,591048 | 1,122393    | 2,785328073 | 0,00000013 |
| HALLMARK_APICAL_JUNCTION           | 3,533321    | 3,986106 | 8,154383 | 0,054254    | 1,027041775 | 0,00000013 |
| HALLMARK_ANDROGEN_RESPONSE         | 2,995932    | 7,787059 | 3,756669 | 3,346517    | 2,526837643 | 1,881757   |
| HALLMARK_ALLOGRAFT_REJECTION       | 2,685821    | 0,04328  | 0,3748   | 0,701148    | 1,197507354 | 0,563962   |
| HALLMARK_UNFOLDED_PROTEIN_RESPONS  | 2,576666    | 4,792946 | 0,227096 | 25,0262     | 11,18767232 | 15,61567   |
| HALLMARK_MYOGENESIS                | 2,456178    | 4,463978 | 3,076006 | 0,001661    | 0,052043943 | 0,00000013 |
| HALLMARK_REACTIVE_OXIGEN_SPECIES_P | 2,423762    | 0,589527 | 4,064399 | 3,307276    | 2,872328616 | 4,006558   |
| HALLMARK_DNA_REPAIR                | 2,368222    | 2,946959 | 5,260527 | 12,23167    | 5,122950873 | 29,83106   |
| HALLMARK_KRAS_SIGNALING_UP         | 2,242744    | 3,618786 | 6,961996 | 0,070233    | 0,309559477 | 0,00000013 |

|                                    |          |           |          |            |             |            |
|------------------------------------|----------|-----------|----------|------------|-------------|------------|
| HALLMARK_NOTCH_SIGNALING           | 2,142473 | 1,642963  | 3,579575 | 1,246696   | 1,412167843 | 0,098036   |
| HALLMARK_XENOBIOTIC_METABOLISM     | 2,102266 | 2,406661  | 5,479666 | 1,793864   | 2,084393126 | 0,019761   |
| HALLMARK_COAGULATION               | 2,046873 | 3,041721  | 4,929165 | 0,001661   | 0,194433174 | 0,00000013 |
| HALLMARK_FATTY_ACID_METABOLISM     | 1,902755 | 0,208192  | 4,326749 | 13,50998   | 11,11401738 | 3,659594   |
| HALLMARK_BILE_ACID_METABOLISM      | 1,343289 | 0,372908  | 3,141794 | 0,918788   | 1,795154356 | 0,00000013 |
| HALLMARK_APICAL_SURFACE            | 0,85983  | 1,172019  | 0,361201 | 1,131127   | 0,553831016 | 0,123749   |
| HALLMARK_EPITHELIAL_MESENCHYMAL_TF | 0,636127 | 2,83392   | 4,315474 | 0,00000953 | 0,000240402 | 0,00000013 |
| HALLMARK_OXIDATIVE_PHOSPHORYLATION | 0,37211  | 0,407994  | 2,850124 | 35,31482   | 54,13666626 | 48,62552   |
| HALLMARK_WNT_BETA_CATENIN_SIGNALIN | 0,251852 | 0,401881  | 1,050288 | 2,507028   | 2,933395069 | 0,448749   |
| HALLMARK_HEDGEHOG_SIGNALING        | 0,086565 | 0,18715   | 0,361201 | 0,27066    | 0,76134047  | 0,00000013 |
| HALLMARK_ANGIOGENESIS              | 0,080679 | 1,097841  | 3,776017 | 0,054254   | 0,117023297 | 0,00000013 |
| HALLMARK_SPERMATOGENESIS           | 0,001514 | 0,04328   | 0,148403 | 3,044301   | 0,434988119 | 2,432845   |
| HALLMARK_PANCREAS_BETA_CELLS       | 0,000683 | 0,18715   | 0,361201 | 0,001661   | 0,028567473 | 0,00000013 |
| HALLMARK_KRAS_SIGNALING_DN         | 0,000683 | 0,099957  | 0,103034 | 0,00000953 | 0,000240402 | 0,00000013 |
| HALLMARK_G2M_CHECKPOINT            | 0,000683 | 0,052428  | 1,68E-10 | 69,47117   | 1,28069982  | 74,42111   |
| HALLMARK_E2F_TARGETS               | 0        | 0,0000367 | 1,68E-10 | 96,74523   | 0,194433174 | 103,056    |
| HALLMARK_MYC_TARGETS_V1            | 0        | 0,0000367 | 1,68E-10 | 78,9164    | 30,09305613 | 95,51818   |
| HALLMARK_MYC_TARGETS_V2            | 0        | 0,0000367 | 1,68E-10 | 26,75196   | 18,55265426 | 24,62721   |

**Supplementary Table 5. Genotyping primers**

| Gene  | Site                        | Sequence                      |
|-------|-----------------------------|-------------------------------|
| mEmp1 | 5' specific integration PCR | F: CTAATGCTCCTGGTTCTGTCTTG    |
|       |                             | R: AAGACGGCAATATGGTGGAAAAT    |
|       | 3' specific integration PCR | F: GCATTGTCTGAGTAGGTGTCATT    |
|       |                             | R: AGTGTGATGAAAGCTGTTGAGAG    |
| mLgr5 | 5' specific integration PCR | F: GCACCTATTTGGTAGCTGGCTGATCC |
|       |                             | R: GCTACAGACGTTGTTTGTCTTCAA   |
|       | 3' specific integration PCR | F: ATGCTGGGGATGCGGTGGGCTCTAT  |
|       |                             | R: AGAAGCATGCTCCTACTCAGAAATAA |

**Supplementary Table 6. Immunofluorescence protocol**

| <b>Antibody</b>                 | <b>Company</b>   | <b>Reference</b> | <b>Antigen retrieval</b> | <b>Dilution</b> | <b>Time inc.</b> | <b>Host</b> |
|---------------------------------|------------------|------------------|--------------------------|-----------------|------------------|-------------|
| tdTomato                        | Rockland         | 600-401-379      | Tris-EDTA                | 1/100           | ON 4°C           | Rabbit      |
| tdTomato                        | Sicgen           | AB8181-200       | Tris-EDTA                | 1/100           | ON 4°C           | Goat        |
| GFP                             | Abcam            | ab6673           | Tris-EDTA                | 1/200           | 2h RT            | Goat        |
| E-Cadherin                      | BD               | 610182           | Tris-EDTA                | 1/300           | ON 4°C           | Mouse       |
| CD31                            | Abcam            | ab28364          | Tris-EDTA                | 1/300           | ON 4°C           | Rabbit      |
| KRT20                           | Sigma            | HPA024309        | Tris-EDTA                | 1/100           | ON 4°C           | Rabbit      |
| KRT17                           | Sigma            | HPA000453        | Tris-EDTA                | 1/100           | ON 4°C           | Rabbit      |
| a-SMA                           | Abcam            | ab7817           | Tris-EDTA                | 1/200           | ON 4°C           | Mouse       |
| CD3                             | ABCAM            | ab16669          | Tris-EDTA                | 1/500 + T       | ON 4°C           | Rabbit      |
| EpCAM                           | R&D (Bio-techne) | AF960            | Tris-EDTA                | 1/50            | ON 4°C           | Goat        |
| LAMC2                           | Sigma            | AMAB91098        | Tris-EDTA                | 1/100           | ON 4°C           | Mouse       |
| Alexa Fluor 647 anti-Rabbit IgG | Thermo Fisher    | A31573           |                          | 1/400           | 1h RT            | Donkey      |
| Alexa Fluor 647 anti-Mouse IgG  | Thermo Fisher    | A31571           |                          | 1/400           | 1h RT            | Donkey      |

**Supplementary Table 7. Gene signatures used in this study**

| <b>All-HR</b> | <b>TME-HR</b> | <b>EpiHR</b> | <b>Lgr5 signature</b> | <b>Wnt ON signature (Morral et al. 2020)</b> | <b>mKi67 (Basak et al. 2014)</b> |
|---------------|---------------|--------------|-----------------------|----------------------------------------------|----------------------------------|
| PABPC5        | PABPC5        | NGRN         | BCL11B                | ASCL2                                        | CDKN1B                           |
| RBM46         | RBM46         | FBXL13       | AXIN2                 | AXIN2                                        | PIF1                             |
| TAS2R8        | TAS2R8        | ITGA3        | LGR5                  | LGR5                                         | CCNA1                            |
| IFNA5         | IFNA5         | SLC25A25     | ASCL2                 | KIAA1199                                     | GTSE1                            |
| COL1A1        | COL1A1        | SEMA4B       | LRIG1                 | SP5                                          | CEP55                            |
| LUM           | LUM           | MAPK3        |                       | AXIN2                                        | KIF20B                           |
| TPT1          | TPT1          | RIN1         |                       | CACHD1                                       | CENPE                            |
| ZDHHC15       | ZDHHC15       | PNPLA2       |                       | CST1                                         | KIF18A                           |
| C11orf96      | C11orf96      | RHOD         |                       | LGR5                                         | BUB1                             |
| VCAN          | VCAN          | MID1IP1      |                       | SMOC2                                        | CDC25B                           |
| DCN           | DCN           | DDR1         |                       | FAM216A                                      | GJB3                             |
| IGFBP5        | IGFBP5        | LAMB3        |                       | LEF1                                         | KNSTRN                           |
| IGFBP7        | IGFBP7        | FLRT1        |                       | CYP4X1                                       | CDCA3                            |
| USP44         | USP44         | PRSS22       |                       | SLC12A2                                      | KIF18B                           |
| SRP14         | SRP14         | LAMC2        |                       | ASCL2                                        | MELK                             |
| ANTXR1        | ANTXR1        | HOXA4        |                       | DPEP1                                        | TROAP                            |
| CTSK          | CTSK          | FAM83A       |                       | NKD1                                         | DDIAS                            |
| COL3A1        | COL3A1        | EXOC7        |                       | LRP4                                         | CKAP2                            |
| HYAL2         | HYAL2         | TNFRSF21     |                       | ZNRF3                                        | KIF20A                           |
| COL5A1        | COL5A1        | RIPK4        |                       | PTPRO                                        | MIS18BP1                         |
| CALD1         | CALD1         | PRPH         |                       | APCDD1                                       | CCNB2                            |
| POSTN         | POSTN         | KRT19        |                       | TNFRSF19                                     | CDC20                            |
| FXR2          | FXR2          | COLEC10      |                       | SLC12A2                                      | CKAP2L                           |
| SPARC         | SPARC         | SPINT1       |                       | SOX2                                         | CCNB1                            |
| ADAMTS2       | ADAMTS2       | VGLL1        |                       | PTCH1                                        | CRYM                             |
| THBS2         | THBS2         | ZNF185       |                       | TSPAN5                                       | TPX2                             |
| COL1A2        | COL1A2        | GJB3         |                       | MYRIP                                        | DLGAP5                           |
| CYFIP1        | CYFIP1        | PAEP         |                       | CDK6                                         | BORA                             |
| TIMP2         | TIMP2         | RIMBP2       |                       | ITGA9                                        | NEK2                             |
| PLAT          | PLAT          | WFDC3        |                       | H19                                          | CDKN3                            |
| C1S           | C1S           | GAS6         |                       | PPP2R2C                                      | ASPM                             |



|           |           |           |              |          |
|-----------|-----------|-----------|--------------|----------|
| VAMP2     | VAMP2     | HTR2C     | IGFL2        | PSRC1    |
| CCDC80    | CCDC80    | MROH6     | CHI3L1       | KIF23    |
| TWF2      | TWF2      | CAPN12    | FRY          | PCSK6    |
| FAM129B   | FAM129B   | FBXL14    | CXCR4        | OSCP1    |
| ISLR      | ISLR      | MAGI2     | SLC28A3      | SLC28A3  |
| CDH10     | CDH10     | ANXA3     | SACS         | NRARP    |
| ING4      | ING4      | PPL       | HAS2         | CENPA    |
| GPNMB     | GPNMB     | BAIAP2    | SP8          | ALPP     |
| TSG101    | TSG101    | LINGO1    | NKD1         | ALPP     |
| AXL       | AXL       | KLK7      | AXIN2        | ALPP     |
| COL8A1    | COL8A1    | EPHA2     | LOC100505730 | SHCBP1   |
| TNS1      | TNS1      | KRT17     | AXIN2        | ARHGEF39 |
| LINC00472 | LINC00472 | SCGN      | CDCA7        | ANLN     |
| ABHD4     | ABHD4     | KLK5      | LOC100134361 | HMMR     |
| MXRA5     | MXRA5     | LAMA3     | CDCA7        | PARPBP   |
| COL6A1    | COL6A1    | EPS8L1    | CDK6         | TLR1     |
| GREM1     | GREM1     | FXYD4     | ETS2         | CDC25C   |
| CERS5     | CERS5     | SNX24     | SOX4         | CCNF     |
| PRRX2     | PRRX2     | SLC22A18  | VSNL1        | AURKA    |
| NRG3      | NRG3      | KLK8      | CADM1        | PRC1     |
| EFEMP1    | EFEMP1    | KCNN4     | PTCH1        | CENPF    |
| NXN       | NXN       | RASAL1    | SLC7A8       | GSDMC    |
| CTHRC1    | CTHRC1    | LEMD1     | ZNF704       | SPC25    |
| FBN1      | FBN1      | KCNK3     | FAM46C       | KIF2C    |
| CAV1      | CAV1      | RNF39     | FAM43A       | KIF14    |
| C1R       | C1R       | HIST2H2BE | PROX1        | EFCAB11  |
| COL5A2    | COL5A2    | LMO7      | NRXN3        | PRR11    |
| MMP2      | MMP2      | C1orf116  | FGF18        | KIF22    |
| CRISPLD2  | CRISPLD2  | PSORS1C1  | LYZ          | GSDMC    |
| COL12A1   | COL12A1   | GPRC5A    | BAMBI        | PLK1     |
| CYGB      | CYGB      | SEZ6L2    | CADM1        |          |
| TAGLN     | TAGLN     | C19orf33  | AMACR        |          |
| MGP       | MGP       | GDPD3     | LRIG1        |          |

|          |          |          |          |
|----------|----------|----------|----------|
| TCF4     | TCF4     | KLK10    | NAV2     |
| RORB     | RORB     | SLC20A1  | TSPAN5   |
| FSTL1    | FSTL1    | KLK11    | KREMEN1  |
| LOXL4    | LOXL4    | KLK6     | ETS2     |
| DKK3     | DKK3     | SCEL     | HAS2     |
| SPON2    | SPON2    | KCNJ16   | KCNJ2    |
| COL6A3   | COL6A3   | KRT80    | PROX1    |
| PDGFC    | PDGFC    | CAMK2N1  | SLC16A10 |
| BASP1    | BASP1    | KRT6A    | TSPAN5   |
| BGN      | BGN      | DISP2    | PRSS23   |
| TMEM51   | TMEM51   | SLC2A1   | C21orf63 |
| PMP22    | PMP22    | SCNN1A   | RGMB     |
| SEMA3D   | SEMA3D   | TM4SF4   | PROX1    |
| LGALS1   | LGALS1   | MSLN     | RTKN2    |
| NNMT     | NNMT     | COL17A1  | FREM2    |
| FN1      | FN1      | FAM155A  | KCNJ2    |
| IL1R1    | IL1R1    | KRT6B    | OXGR1    |
| PDGFRA   | PDGFRA   | PLA2G10  | ABCC4    |
| CCNDBP1  | CCNDBP1  | MYBPC1   | SLC7A8   |
| LRAT     | LRAT     | SFTA2    | MME      |
| CES5A    | CES5A    | SLPI     | VSNL1    |
| MMP19    | MMP19    | VSIG2    | KCNJ8    |
| SFRP2    | SFRP2    | RHBDL2   | RGMB     |
| CYR61    | CYR61    | SERPINB5 | RGMB     |
| SERPINF1 | SERPINF1 | S100A2   | ZNF704   |
| ARHGEF2  | ARHGEF2  | MMP7     | ASB4     |
| INHBA    | INHBA    | CTSE     |          |
| FIBIN    | FIBIN    | NXF3     |          |
| GAS7     | GAS7     | GSTA2    |          |
| STARD6   | STARD6   | GSTA1    |          |
| PHC1     | PHC1     | CLSTN2   |          |
| STAC     | STAC     | HOXB8    |          |
| GAS1     | GAS1     | GABRP    |          |

|          |          |         |
|----------|----------|---------|
| SDC2     | SDC2     | TACSTD2 |
| COL15A1  | COL15A1  | DUSP27  |
| LOXL2    | LOXL2    |         |
| ARL8A    | ARL8A    |         |
| THY1     | THY1     |         |
| NOTCH4   | NOTCH4   |         |
| ALDH3B1  | ALDH3B1  |         |
| TNC      | TNC      |         |
| ASPN     | ASPN     |         |
| GJA1     | GJA1     |         |
| ARMCX6   | ARMCX6   |         |
| SPAG7    | SPAG7    |         |
| VIM      | VIM      |         |
| SLC24A3  | SLC24A3  |         |
| TRIM55   | TRIM55   |         |
| PLAU     | PLAU     |         |
| WBP2     | WBP2     |         |
| TNFAIP6  | TNFAIP6  |         |
| UNC5B    | UNC5B    |         |
| RAB31    | RAB31    |         |
| COL4A2   | COL4A2   |         |
| EFEMP2   | EFEMP2   |         |
| MRC2     | MRC2     |         |
| CYBRD1   | CYBRD1   |         |
| GNPTG    | GNPTG    |         |
| DNASE1L1 | DNASE1L1 |         |
| ITGBL1   | ITGBL1   |         |
| CTGF     | CTGF     |         |
| PALLD    | PALLD    |         |
| INPP5K   | INPP5K   |         |
| PDGFB    | PDGFB    |         |
| IGFBP3   | IGFBP3   |         |
| ANGPTL2  | ANGPTL2  |         |

|          |           |
|----------|-----------|
| FBLN1    | FBLN1     |
| PDPN     | PDPN      |
| ITGAV    | ITGAV     |
| PRKAG1   | PRKAG1    |
| AEBP1    | AEBP1     |
| SPARCL1  | SPARCL1   |
| WDFY3-AS | WDFY3-AS2 |
| FNDC1    | FNDC1     |
| PXDN     | PXDN      |
| MCAM     | MCAM      |
| POLD4    | POLD4     |
| SERPING1 | SERPING1  |
| COL4A1   | COL4A1    |
| NFAM1    | NFAM1     |
| TMEM119  | TMEM119   |
| PRRX1    | PRRX1     |
| CLMP     | CLMP      |
| BAALC    | BAALC     |
| TMEM63B  | TMEM63B   |
| MFAP4    | MFAP4     |
| ACTA2    | ACTA2     |
| NOTCH3   | NOTCH3    |
| TWIST1   | TWIST1    |
| LHFP     | LHFP      |
| RELB     | RELB      |
| SUSD5    | SUSD5     |
| COL14A1  | COL14A1   |
| LRRN4CL  | LRRN4CL   |
| NGRN     | COL5A3    |
| COL5A3   | PLD2      |
| PLD2     | SERTAD2   |
| SERTAD2  | TIMP1     |
| TIMP1    | PTPRS     |

|         |         |
|---------|---------|
| PTPRS   | ALDH1A3 |
| ALDH1A3 | TFPI    |
| TFPI    | STOM    |
| STOM    | EDNRA   |
| EDNRA   | CCL2    |
| CCL2    | S100A11 |
| S100A11 | A2M     |
| A2M     | COL6A2  |
| COL6A2  | IFI27L2 |
| IFI27L2 | PLXDC1  |
| PLXDC1  | OLFML2A |
| OLFML2A | COL18A1 |
| COL18A1 | FERMT2  |
| FERMT2  | SPHK1   |
| SPHK1   | DCBLD1  |
| FBXL13  | MYO9B   |
| DCBLD1  | TUBB6   |
| MYO9B   | ZFP92   |
| TUBB6   | SLC27A1 |
| ZFP92   | ADAMTS1 |
| SLC27A1 | FEZ2    |
| ADAMTS1 | HTRA1   |
| FEZ2    | PTGDS   |
| HTRA1   | S1PR3   |
| PTGDS   | PPP1R11 |
| ITGA3   | OLFML3  |
| S1PR3   | MXRA8   |
| PPP1R11 | EFHD2   |
| OLFML3  | SLIT2   |
| MXRA8   | MAFB    |
| EFHD2   | PCOLCE  |
| SLIT2   | LRCH4   |
| MAFB    | LAMC1   |

|           |                     |
|-----------|---------------------|
| PCOLCE    | FZD8                |
| LRCH4     | TIMP3               |
| LAMC1     | IL4R                |
| FZD8      | EDIL3               |
| TIMP3     | PDLIM7              |
| IL4R      | PTPN14              |
| EDIL3     | MYH10               |
| PDLIM7    | RNF167              |
| PTPN14    | ITGB5               |
| MYH10     | DRAM1               |
| RNF167    | FILIP1L             |
| ITGB5     | SLITRK3             |
| DRAM1     | KCNQ5               |
| FILIP1L   | SULF1               |
| SLITRK3   | EPAS1               |
| KCNQ5     | LAMA2               |
| SULF1     | FAP                 |
| EPAS1     | FHL3                |
| LAMA2     | GEM                 |
| FAP       | GPX8                |
| FHL3      | LMBRD1              |
| GEM       | EVA1B               |
| GPX8      | CHST15              |
| LMBRD1    | NID1                |
| EVA1B     | GIPC1               |
| CHST15    | WISP1-OT1     WISP1 |
| NID1      | C10orf10            |
| GIPC1     | IL6ST               |
| WISP1-OT1 | TJP1                |
| C10orf10  | GPSM3               |
| IL6ST     | COL11A1             |
| TJP1      | LAMB2               |
| GPSM3     | TMEM204             |

|          |         |
|----------|---------|
| COL11A1  | SALL2   |
| LAMB2    | LOX     |
| TMEM204  | FSCN1   |
| SALL2    | PDLIM3  |
| LOX      | PPARD   |
| FSCN1    | MMP11   |
| PDLIM3   | GPX3    |
| PPARD    | GPR124  |
| MMP11    | LATS2   |
| GPX3     | NTM     |
| GPR124   | HEYL    |
| LATS2    | ZCCHC24 |
| NTM      | GLIPR2  |
| HEYL     | HSPG2   |
| ZCCHC24  | OBSL1   |
| GLIPR2   | FZD1    |
| SLC25A25 | PTRF    |
| HSPG2    | LOXL1   |
| OBSL1    | AP1B1   |
| FZD1     | JAM3    |
| PTRF     | KLF9    |
| LOXL1    | COL10A1 |
| AP1B1    | LAMA4   |
| JAM3     | MSN     |
| KLF9     | COX7A1  |
| COL10A1  | MFAP5   |
| LAMA4    | COLEC12 |
| MSN      | DIO2    |
| COX7A1   | MEX3B   |
| MFAP5    | HOXB4   |
| COLEC12  | SOX13   |
| DIO2     | CCDC28A |
| MEX3B    | RAB34   |

|         |         |
|---------|---------|
| HOXB4   | GLIS2   |
| SOX13   | AKT3    |
| CCDC28A | CILP    |
| RAB34   | ITIH5   |
| GLIS2   | CDH11   |
| AKT3    | FGFR1   |
| CILP    | CCDC107 |
| ITIH5   | DYSF    |
| CDH11   | NRP2    |
| FGFR1   | SFRP4   |
| SEMA4B  | OSMR    |
| CCDC107 | UNC5D   |
| DYSF    | ABTB1   |
| NRP2    | OLFML2B |
| SFRP4   | GSN     |
| OSMR    | ATP6V0C |
| UNC5D   | FAM198B |
| ABTB1   | DPYSL3  |
| OLFML2B | SNED1   |
| GSN     | ELN     |
| ATP6V0C | RGS5    |
| FAM198B | THBS1   |
| DPYSL3  | NDN     |
| SNED1   | ADAP2   |
| ELN     | RARRES2 |
| RGS5    | ROGDI   |
| THBS1   | CBX6    |
| NDN     | RUNX1T1 |
| ADAP2   | SSPN    |
| RARRES2 | CD34    |
| ROGDI   | NLGN4Y  |
| CBX6    | DLC1    |
| RUNX1T1 | RBMS1   |



|          |          |
|----------|----------|
| SSPN     | FHL1     |
| CD34     | RFTN1    |
| NLGN4Y   | SPOCK1   |
| DLC1     | CLCF1    |
| RBMS1    | SH2B1    |
| FHL1     | PFDN1    |
| RFTN1    | IKBKG    |
| SPOCK1   | DACT1    |
| CLCF1    | COPZ2    |
| SH2B1    | PDLIM4   |
| PFDN1    | MSRA     |
| IKBKG    | FLNA     |
| DACT1    | TMEM45A  |
| COPZ2    | PPP1R14A |
| PDLIM4   | CCDC160  |
| MSRA     | BTBD19   |
| FLNA     | SNAI2    |
| TMEM45A  | UBE2E2   |
| PPP1R14A | NRP1     |
| CCDC160  | LBH      |
| BTBD19   | PHLDB2   |
| SNAI2    | GUCY1B3  |
| UBE2E2   | APLP1    |
| NRP1     | SLC43A3  |
| LBH      | RNF111   |
| PHLDB2   | A4GALT   |
| GUCY1B3  | ZNF132   |
| APLP1    | VIPAS39  |
| SLC43A3  | SESN2    |
| RNF111   | BNC2     |
| A4GALT   | PHLDA1   |
| ZNF132   | PPAP2A   |
| VIPAS39  | ZEB1     |

|          |          |
|----------|----------|
| SESN2    | FAM20C   |
| BNC2     | RGS16    |
| PHLDA1   | ARMCX1   |
| PPAP2A   | CTSL     |
| ZEB1     | KCNE2    |
| FAM20C   | GNB4     |
| RGS16    | EFS      |
| ARMCX1   | UBTD1    |
| CTSL     | SHISA2   |
| KCNE2    | C15orf52 |
| GNB4     | SETBP1   |
| EFS      | FAM101B  |
| UBTD1    | CSPG4    |
| SHISA2   | CACNB3   |
| C15orf52 | LEF1     |
| SETBP1   | SVEP1    |
| FAM101B  | MED11    |
| CSPG4    | ZMAT3    |
| CACNB3   | CHSY1    |
| LEF1     | LAMB1    |
| SVEP1    | MOAP1    |
| MED11    | IFFO1    |
| ZMAT3    | MSRB3    |
| CHSY1    | FBLN5    |
| LAMB1    | BTBD10   |
| MOAP1    | TMBIM1   |
| IFFO1    | TPM2     |
| MSRB3    | CTSO     |
| FBLN5    | GGT5     |
| BTBD10   | CERCAM   |
| TMBIM1   | TSPAN4   |
| TPM2     | KANK2    |
| CTSO     | PTPLAD2  |

|          |          |
|----------|----------|
| GGT5     | MFAP2    |
| CERCAM   | GLT8D2   |
| TSPAN4   | CCL13    |
| KANK2    | TNFAIP2  |
| PTPLAD2  | ABCA1    |
| MFAP2    | ANXA5    |
| GLT8D2   | CTNNBIP1 |
| CCL13    | GPR176   |
| TNFAIP2  | CLIC4    |
| ABCA1    | GLIPR1   |
| ANXA5    | PER1     |
| CTNNBIP1 | ECM1     |
| GPR176   | BEST1    |
| CLIC4    | ADAM28   |
| GLIPR1   | GJC1     |
| PER1     | MRVI1    |
| ECM1     | NOP10    |
| BEST1    | CHST3    |
| ADAM28   | ELK3     |
| GJC1     | DSE      |
| MRVI1    | KIAA0430 |
| NOP10    | YIPF3    |
| CHST3    | LMO2     |
| ELK3     | SLC8A1   |
| MAPK3    | PLXDC2   |
| DSE      | SCN1B    |
| KIAA0430 | SPRED3   |
| YIPF3    | LRRC32   |
| LMO2     | MYLK     |
| SLC8A1   | SH3PXD2B |
| PLXDC2   | IGF1     |
| SCN1B    | MEIS1    |
| SPRED3   | VCAM1    |

|          |          |
|----------|----------|
| LRRC32   | TUBA1A   |
| MYLK     | RGS2     |
| SH3PXD2B | NOG      |
| IGF1     | IGSF11   |
| MEIS1    | CD248    |
| VCAM1    | PIAS1    |
| TUBA1A   | KIRREL   |
| RGS2     | TRO      |
| NOG      | CTSC     |
| IGSF11   | ADAMTSL4 |
| CD248    | ABCA8    |
| PIAS1    | CALU     |
| KIRREL   | COMP     |
| TRO      | BCL6B    |
| CTSC     | FAM3C    |
| ADAMTSL4 | CYB5R1   |
| ABCA8    | EGR3     |
| CALU     | GPX7     |
| COMP     | TCN2     |
| BCL6B    | PDGFRB   |
| FAM3C    | ATP6AP1  |
| CYB5R1   | ADAM12   |
| EGR3     | MAN1C1   |
| GPX7     | AKAP12   |
| TCN2     | BTG1     |
| PDGFRB   | GUCY1A3  |
| ATP6AP1  | JOSD1    |
| ADAM12   | VAMP8    |
| MAN1C1   | C16orf86 |
| AKAP12   | AATK     |
| BTG1     | TSC22D3  |
| GUCY1A3  | IFI16    |
| JOSD1    | MYD88    |

|          |          |
|----------|----------|
| VAMP8    | BCAM     |
| C16orf86 | SOBP     |
| AATK     | DSEL     |
| TSC22D3  | B3GALT4  |
| IFI16    | FBLN2    |
| MYD88    | MITF     |
| BCAM     | BCAT1    |
| SOBP     | SGCE     |
| DSEL     | DNM1     |
| B3GALT4  | TAGLN3   |
| FBLN2    | MIR143HG |
| MITF     | C4orf3   |
| BCAT1    | NES      |
| SGCE     | PTAFR    |
| DNM1     | MAP6     |
| TAGLN3   | PPAP2B   |
| MIR143HG | LMO4     |
| C4orf3   | AP2A2    |
| NES      | EMP1     |
| PTAFR    | CTNNA3   |
| MAP6     | FZD4     |
| PPAP2B   | BICC1    |
| LMO4     | GNAO1    |
| AP2A2    | OLFML1   |
| EMP1     | SPSB3    |
| CTNNA3   | SRPX     |
| FZD4     | DEDD2    |
| BICC1    | ATP8A2   |
| GNAO1    | RGL2     |
| OLFML1   | EMP3     |
| SPSB3    | DNAJC4   |
| SRPX     | CD68     |
| DEDD2    | MYOF     |

|          |          |
|----------|----------|
| ATP8A2   | ZNF410   |
| RGL2     | TRIM17   |
| EMP3     | RAB5B    |
| DNAJC4   | ACTG2    |
| CD68     | TBC1D25  |
| MYOF     | LDB2     |
| ZNF410   | ST3GAL1  |
| TRIM17   | HIC1     |
| RAB5B    | C16orf62 |
| ACTG2    | LHPP     |
| TBC1D25  | PDGFD    |
| LDB2     | RAI14    |
| ST3GAL1  | ADAM19   |
| HIC1     | DPYSL2   |
| C16orf62 | GRIPAP1  |
| LHPP     | DBN1     |
| PDGFD    | CERS2    |
| RAI14    | THBD     |
| ADAM19   | NFIC     |
| DPYSL2   | STX1A    |
| GRIPAP1  | ST5      |
| DBN1     | COL8A2   |
| CERS2    | MMP14    |
| THBD     | RHOJ     |
| NFIC     | SPG20    |
| RIN1     | GPR108   |
| STX1A    | RILP     |
| ST5      | SIM1     |
| COL8A2   | HIF1A    |
| MMP14    | NR2F1    |
| RHOJ     | ZDHHC7   |
| SPG20    | TUSC3    |
| GPR108   | UCHL1    |

|          |                                              |
|----------|----------------------------------------------|
| RILP     | ROR2                                         |
| SIM1     | LRRC15                                       |
| HIF1A    | ARHGEF17                                     |
| NR2F1    | TTC28                                        |
| ZDHHC7   | ARL4C                                        |
| TUSC3    | APCDD1L                                      |
| UCHL1    | PPP1R18                                      |
| ROR2     | TGFB1                                        |
| LRRC15   | FLRT2                                        |
| ARHGEF17 | CRMP1                                        |
| TTC28    | ITGA1                                        |
| ARL4C    | CAV2                                         |
| APCDD1L  | HGSNAT                                       |
| PPP1R18  | HEG1                                         |
| TGFB1    | TSHZ3                                        |
| FLRT2    | PTGIS                                        |
| CRMP1    | SH3BP5                                       |
| ITGA1    | ZNF428                                       |
| CAV2     | PTPRM                                        |
| HGSNAT   | LTBP1                                        |
| HEG1     | FAM196B                                      |
| TSHZ3    | FUT11                                        |
| PTGIS    | TMEM242                                      |
| SH3BP5   | CRLF1                                        |
| ZNF428   | DDR2                                         |
| PTPRM    | QKI                                          |
| LTBP1    | LSP1                                         |
| FAM196B  | ATP2B4                                       |
| FUT11    | PLD3                                         |
| TMEM242  | RSPH3                                        |
| CRLF1    | PCDHGC5     PCDHGA8     PCDHGA11     PCDHGC3 |
| DDR2     | PRELP                                        |
| QKI      | FRMD6                                        |

|          |          |
|----------|----------|
| LSP1     | PAMR1    |
| ATP2B4   | KCNE4    |
| PLD3     | SERPINE1 |
| RSPH3    | RBMS3    |
| PCDHGC5  | NR2F2    |
| PRELP    | TRIP4    |
| FRMD6    | MOXD1    |
| PAMR1    | NID2     |
| KCNE4    | GNG11    |
| SERPINE1 | PPIC     |
| PNPLA2   | ZSCAN18  |
| RBMS3    | DAB2     |
| NR2F2    | MXRA7    |
| TRIP4    | TCF25    |
| MOXD1    | ACVR1    |
| NID2     | WWTR1    |
| GNG11    | PLXNC1   |
| PPIC     | CCDC102B |
| ZSCAN18  | EVC      |
| DAB2     | KIF3C    |
| MXRA7    | FOLR2    |
| TCF25    | RCN3     |
| ACVR1    | ARHGAP24 |
| WWTR1    | PIAS3    |
| PLXNC1   | PLEKHG2  |
| CCDC102B | ENTPD1   |
| EVC      | DPT      |
| KIF3C    | ANGPT2   |
| FOLR2    | CLEC2B   |
| RCN3     | TCEAL3   |
| ARHGAP24 | DNAJB2   |
| PIAS3    | THSD7B   |
| PLEKHG2  | KAL1     |



|          |            |
|----------|------------|
| ENTPD1   | DDA1       |
| DPT      | SLC12A6    |
| ANGPT2   | CLU        |
| CLEC2B   | VAMP3      |
| TCEAL3   | ATG14      |
| DNAJB2   | MYL9       |
| THSD7B   | PRICKLE1   |
| KAL1     | CSGALNACT2 |
| DDA1     | SYDE1      |
| SLC12A6  | EHD2       |
| CLU      | ZNF521     |
| VAMP3    | LRP1       |
| ATG14    | LGI1       |
| MYL9     | SLITRK4    |
| PRICKLE1 | SEPP1      |
| CSGALNAC | ZMIZ1      |
| SYDE1    | SMIM3      |
| EHD2     | PLBD2      |
| ZNF521   | CCDC3      |
| LRP1     | CLTB       |
| LGI1     | CMTM3      |
| SLITRK4  | PRDM1      |
| SEPP1    | EID1       |
| ZMIZ1    | CDKN1C     |
| SMIM3    | ABCA6      |
| PLBD2    | LYPD3      |
| CCDC3    | NOTCH2     |
| CLTB     | SULF2      |
| CMTM3    | GXYLT2     |
| PRDM1    | FBXL7      |
| EID1     | WLS        |
| CDKN1C   | CRYAB      |
| ABCA6    | KLHDC8A    |

|          |           |
|----------|-----------|
| LYPD3    | PKD2      |
| NOTCH2   | PAM       |
| SULF2    | BAI3      |
| GXYLT2   | PPAPDC1A  |
| FBXL7    | MSC       |
| WLS      | PRR24     |
| CRYAB    | DACT3     |
| KLHDC8A  | PCBP4     |
| PKD2     | NLGN2     |
| PAM      | ASAP1     |
| BAI3     | ADAMTS12  |
| PPAPDC1A | AKR1B1    |
| MSC      | MAB21L2   |
| PRR24    | CHPF      |
| DACT3    | RENBP     |
| PCBP4    | GOS2      |
| NLGN2    | TSPYL4    |
| ASAP1    | AMOTL1    |
| ADAMTS12 | IGFBP4    |
| AKR1B1   | RGL1      |
| MAB21L2  | ITPRIP    |
| CHPF     | CSRP2     |
| RENBP    | ANK2      |
| GOS2     | SHISA4    |
| TSPYL4   | MPPE1     |
| RHOD     | LINC00839 |
| AMOTL1   | LRRTM1    |
| IGFBP4   | GPR68     |
| RGL1     | 38231     |
| ITPRIP   | NEXN      |
| CSRP2    | CXCL12    |
| ANK2     | FAM218A   |
| SHISA4   | FBLIM1    |

MPPE1 ANXA6  
LINC00839 GALNT10  
LRRTM1 SPATS2L  
GPR68 KLK13  
sep-04 BACE1  
NEXN MAP1A  
CXCL12 GPSM1  
FAM218A PTGER3  
FBLIM1 RCAN2  
ANXA6 GPR4  
GALNT10 SMARCD3  
SPATS2L ARHGEF3  
KLK13 CNKSR2  
BACE1 ZFYVE19  
MAP1A LTBP2  
GPSM1 LMCD1  
PTGER3 MDFI  
RCAN2 WDR13  
GPR4 SPON1  
SMARCD3 PEA15  
ARHGEF3 ZNF438  
CNKSR2 MYH11  
ZFYVE19 MAML2  
LTBP2 FLT1  
HLX  
LMCD1 MAFF  
MDFI PRKCDBP  
WDR13 FYN  
MID1IP1 NFATC1  
SPON1 TENM1  
PEA15 CD109  
ZNF438 BHLHE41  
MYH11 CLIP4

|         |         |
|---------|---------|
| MAML2   | HDAC9   |
| FLT1    | RNF144A |
| HLX     | SGCB    |
| MAFF    | PORCN   |
| PRKCDBP | TRIB2   |
| FYN     | SHC1    |
| NFATC1  | PJA2    |
| TENM1   | TACC1   |
| CD109   | SKI     |
| BHLHE41 | TMEM175 |
| CLIP4   | FRY     |
| HDAC9   | ATXN1   |
| RNF144A | MEDAG   |
| SGCB    | CNRIP1  |
| PORCN   | RELA    |
| TRIB2   | GFPT2   |
| SHC1    | PBX3    |
| PJA2    | MRAS    |
| TACC1   | UBE2R2  |
| SKI     | CD151   |
| TMEM175 | CPQ     |
| FRY     | PTPN21  |
| ATXN1   | TPST1   |
| MEDAG   | TPP1    |
| CNRIP1  | TXNDC15 |
| DDR1    | PCDHB11 |
| RELA    | PLCD1   |
| GFPT2   | PLK3    |
| PBX3    | C7orf57 |
| MRAS    | ULK3    |
| UBE2R2  | EBF1    |
| CD151   | CLSTN3  |
| CPQ     | MCC     |

|          |          |
|----------|----------|
| PTPN21   | MPDZ     |
| TPST1    | GADD45B  |
| TPP1     | ATP10A   |
| TXNDC15  | CMTM7    |
| PCDHB11  | YIPF1    |
| PLCD1    | GINM1    |
| PLK3     | UGCG     |
| C7orf57  | HOPX     |
| ULK3     | ADIPOR1  |
| EBF1     | DEGS1    |
| CLSTN3   | ADM      |
| MCC      | PEAK1    |
| MPDZ     | ZNF469   |
| GADD45B  | ADAM8    |
| ATP10A   | YPEL3    |
| LAMB3    | UPP1     |
| CMTM7    | EVL      |
| YIPF1    | SERPINH1 |
| GINM1    | ANKRD50  |
| UGCG     | SNAPC2   |
| HOPX     | DNAJB5   |
| ADIPOR1  | C1QTNF6  |
| DEGS1    | EGR2     |
| ADM      | NR4A3    |
| PEAK1    | METRNL   |
| ZNF469   | CEP170   |
| ADAM8    | CEBPB    |
| YPEL3    | ARPP19   |
| UPP1     | C1orf85  |
| EVL      | AHNAK2   |
| SERPINH1 | BHLHE40  |
| ANKRD50  | FAM110D  |
| SNAPC2   | MEA1     |

|          |          |
|----------|----------|
| DNAJB5   | WIPF1    |
| C1QTNF6  | SCD5     |
| EGR2     | ADAMTS10 |
| NR4A3    | SLC9A1   |
| METRNL   | DCBLD2   |
| CEP170   | TMEM108  |
| CEBPB    | PLEKHM3  |
| ARPP19   | SYNPO2   |
| C1orf85  | CHST11   |
| AHNAK2   | CTSB     |
| BHLHE40  | TOM1L2   |
| FAM110D  | ENPEP    |
| MEA1     | CAPG     |
| WIPF1    | TRPS1    |
| SCD5     | PRNP     |
| ADAMTS10 | EPHA3    |
| SLC9A1   | FAM110B  |
| DCBLD2   | SLFN11   |
| TMEM108  | EML1     |
| PLEKHM3  | FAM129A  |
| SYNPO2   | STAT6    |
| CHST11   | LAYN     |
| CTSB     | NPTX1    |
| TOM1L2   | HSPB8    |
| ENPEP    | BCAR3    |
| CAPG     | TMEM245  |
| TRPS1    | TGFB3    |
| PRNP     | KIF26B   |
| EPHA3    | VSTM4    |
| FAM110B  | C6orf226 |
| SLFN11   | MAGEH1   |
| EML1     | CYTH3    |
| FAM129A  | TECPR1   |

|           |           |
|-----------|-----------|
| STAT6     | SNX18     |
| LAYN      | HIVEP2    |
| NPTX1     | IGFBP6    |
| HSPB8     | C20orf194 |
| BCAR3     | CDK14     |
| TMEM245   | TGFB111   |
| TGFB3     | RNF217    |
| KIF26B    | MR1       |
| VSTM4     | SAT1      |
| C6orf226  | POLR3GL   |
| MAGEH1    | SPSB1     |
| CYTH3     | KIAA1467  |
| TECPR1    | LY86      |
| FLRT1     | MSRB2     |
| SNX18     | CD99L2    |
| HIVEP2    | ITM2B     |
| IGFBP6    | APOE      |
| C20orf194 | HDAC6     |
| CDK14     | MAP1B     |
| TGFB111   | RIN2      |
| RNF217    | FAM19A5   |
| MR1       | UACA      |
| SAT1      | TGFB2     |
| POLR3GL   | AKT1      |
| SPSB1     | RASA3     |
| KIAA1467  | FAM127A   |
| LY86      | TM2D2     |
| MSRB2     | CD276     |
| CD99L2    | FTO       |
| ITM2B     | JDP2      |
| APOE      | BRD2      |
| HDAC6     | STX4      |
| MAP1B     | STX7      |

|         |          |
|---------|----------|
| RIN2    | LIMS1    |
| FAM19A5 | PLOD1    |
| UACA    | RNF112   |
| TGFB2   | PIK3IP1  |
| AKT1    | CLDN11   |
| RASA3   | RXFP1    |
| FAM127A | HEY1     |
| TM2D2   | PCDH7    |
| CD276   | PRKCH    |
| FTO     | CYB5R3   |
| JDP2    | SPP1     |
| BRD2    | RANGRF   |
| STX4    | TSPYL5   |
| STX7    | LPHN2    |
| LIMS1   | ARL4D    |
| PLOD1   | GNG2     |
| RNF112  | VASP     |
| PIK3IP1 | VAMP5    |
| CLDN11  | ANTXR2   |
| RXFP1   | MARCKS   |
| HEY1    | PABPC4L  |
| PCDH7   | INSIG2   |
| PRKCH   | KIAA2022 |
| CYB5R3  | WFDC1    |
| SPP1    | BPGM     |
| RANGRF  | MAP7D1   |
| TSPYL5  | PGR      |
| LPHN2   | DTX3     |
| ARL4D   | AAK1     |
| GNG2    | LRRRC8C  |
| VASP    | TSHZ1    |
| VAMP5   | VPS9D1   |
| ANTXR2  | CSRP1    |



MARCKS FAM126A  
PABPC4L FAM114A1  
INSIG2 ARID5A  
KIAA2022 APBB2  
WFDC1 FAM171B  
BPGM CLEC14A  
MAP7D1 DENND5A  
PGR AKTIP  
DTX3 ATL3  
AAK1 LEPR ||| LEPROT  
LRRC8C RAB9A  
TSHZ1 TAF7  
VPS9D1 FGD5  
CSRP1 RUNX2  
FAM126A DUSP1  
FAM114A1AP1S2  
ARID5A SELPLG  
APBB2 ARMC9  
FAM171B KDM6B  
CLEC14A AFAP1L2  
PRSS22 RAP2B  
DENND5A KCTD7  
AKTIP ZBTB47  
ATL3 SLC38A2  
LEPR ||| L CYP1B1  
RAB9A RASSF8  
TAF7 FKBP10  
FGD5 SGSM2  
RUNX2 PRKACA  
LAMC2 CFL2  
DUSP1 MATK  
AP1S2 STAB1  
SELPLG CBLN3

|          |          |
|----------|----------|
| ARMC9    | DENND3   |
| KDM6B    | RGMA     |
| AFAP1L2  | RABAC1   |
| RAP2B    | MYADM    |
| KCTD7    | DCTN1    |
| ZBTB47   | DFNA5    |
| SLC38A2  | FAM20A   |
| CYP1B1   | TPBG     |
| RASSF8   | PVRL2    |
| FKBP10   | CCDC155  |
| SGSM2    | FKBP7    |
| PRKACA   | DIP2C    |
| CFL2     | SLC10A3  |
| MATK     | ARHGAP23 |
| STAB1    | WWC2     |
| CBLN3    | PDLIM2   |
| DENND3   | THBS3    |
| RGMA     | MINK1    |
| RABAC1   | HDLBP    |
| MYADM    | ACTN1    |
| DCTN1    | NFKBIA   |
| DFNA5    | C12orf57 |
| FAM20A   | ETS1     |
| TPBG     | ZFP36L1  |
| PVRL2    | MAF      |
| CCDC155  | ARHGAP15 |
| FKBP7    | L3MBTL3  |
| DIP2C    | BAG3     |
| SLC10A3  | RPS6KA2  |
| ARHGAP23 | PNRC1    |
| WWC2     | EXTL2    |
| PDLIM2   | ATG4A    |
| THBS3    | OGN      |

|          |          |
|----------|----------|
| MINK1    | TLDC1    |
| HDLBP    | AOC3     |
| ACTN1    | CNPY4    |
| NFKBIA   | CXorf40A |
| C12orf57 | GABRG2   |
| ETS1     | PPEF1    |
| ZFP36L1  | CRHBP    |
| MAF      | GATS     |
| ARHGAP15 | BOC      |
| L3MBTL3  | THBS4    |
| BAG3     | HS3ST2   |
| RPS6KA2  | AP1M1    |
| PNRC1    | RAP2C    |
| EXTL2    | PCDHGA11 |
| ATG4A    | KLHDC8B  |
| OGN      | GLT8D1   |
| TLDC1    | MFGE8    |
| AOC3     | SERINC1  |
| CNPY4    | SVIL     |
| CXorf40A | PXDC1    |
| GABRG2   | DGKA     |
| PPEF1    | OSBPL1A  |
| CRHBP    | JUNB     |
| GATS     | KCND2    |
| BOC      | PPP1R13L |
| THBS4    | MTSS1L   |
| HS3ST2   | PAFAH1B1 |
| AP1M1    | VAT1     |
| RAP2C    | FMOD     |
| PCDHGA11 | SYNE1    |
| KLHDC8B  | PAPPA    |
| GLT8D1   | EHBP1L1  |
| MFGE8    | RORA     |

|          |         |
|----------|---------|
| SERINC1  | SSBP2   |
| SVIL     | UROD    |
| PXDC1    | ID4     |
| DGKA     | ENG     |
| OSBPL1A  | KAT6A   |
| HOXA4    | NAGK    |
| JUNB     | HERC1   |
| KCND2    | NUAK1   |
| PPP1R13L | CBLB    |
| MTSS1L   | LTC4S   |
| PAFAH1B1 | KLHL5   |
| FAM83A   | MOSPD2  |
| VAT1     | STOML1  |
| FMOD     | PODXL   |
| SYNE1    | XYLT1   |
| PAPPA    | DAAM2   |
| EHBP1L1  | RASL12  |
| RORA     | MN1     |
| SSBP2    | SIGIRR  |
| UROD     | DNAJB4  |
| ID4      | PDK4    |
| ENG      | ITGA5   |
| KAT6A    | ZBBX    |
| NAGK     | BMPR2   |
| HERC1    | DCHS1   |
| NUAK1    | CLDN5   |
| CBLB     | KLF8    |
| LTC4S    | ZBTB20  |
| KLHL5    | SCARA3  |
| MOSPD2   | ARL2BP  |
| EXOC7    | TGFBR2  |
| STOML1   | SMARCA1 |
| PODXL    | SH2D3C  |

|          |         |
|----------|---------|
| XYLT1    | FAM131A |
| DAAM2    | MORF4L1 |
| RASL12   | SPRY1   |
| MN1      | SNX33   |
| SIGIRR   | KCNMB1  |
| DNAJB4   | ZNF362  |
| PDK4     | ITGA4   |
| ITGA5    | GLI2    |
| ZBBX     | RGS10   |
| BMPR2    | VGLL4   |
| DCHS1    | SCGB3A2 |
| CLDN5    | WSB1    |
| KLF8     | STC1    |
| ZBTB20   | CXorf36 |
| SCARA3   | SGIP1   |
| ARL2BP   | S100A4  |
| TGFBR2   | INPP5F  |
| SMARCA1  | S100A16 |
| SH2D3C   | CDKN1A  |
| FAM131A  | MFSD1   |
| MORF4L1  | DHRS3   |
| SPRY1    | LDOC1   |
| SNX33    | VEGFC   |
| KCNMB1   | SYNPO   |
| TNFRSF21 | BNIP3L  |
| ZNF362   | ADAMTS6 |
| ITGA4    | PIGB    |
| GLI2     | KDR     |
| RGS10    | ITGB1   |
| VGLL4    | FRMD4B  |
| SCGB3A2  | ARMCX2  |
| WSB1     | PLEKHM2 |
| STC1     | PNMA1   |

|         |          |
|---------|----------|
| CXorf36 | MYO5A    |
| SGIP1   | PFKFB3   |
| S100A4  | BNIP2    |
| INPP5F  | BEND6    |
| S100A16 | SERTAD1  |
| CDKN1A  | TMEM88   |
| MFSD1   | PARVA    |
| DHRS3   | EGR1     |
| LDOC1   | PCDHGA3  |
| VEGFC   | SPIN1    |
| SYNPO   | GNAI2    |
| BNIP3L  | SMTN     |
| ADAMTS6 | FAT4     |
| PIGB    | SWI5     |
| KDR     | ZBTB46   |
| RIPK4   | UBQLN2   |
| ITGB1   | PHLDA3   |
| FRMD4B  | AKAP13   |
| ARMCX2  | ZNF281   |
| PLEKHM2 | LAT2     |
| PNMA1   | MID2     |
| MYO5A   | MYCT1    |
| PFKFB3  | GRIA2    |
| BNIP2   | ERRF1    |
| BEND6   | TEK      |
| SERTAD1 | CLSTN1   |
| TMEM88  | KIAA0247 |
| PARVA   | STEAP4   |
| EGR1    | EFHC1    |
| PCDHGA3 | TPRG1L   |
| SPIN1   | RASSF4   |
| GNAI2   | AMPH     |
| SMTN    | ADAMTSL3 |

|          |          |
|----------|----------|
| FAT4     | C1QTNF7  |
| SWI5     | PLCD3    |
| ZBTB46   | SLC27A6  |
| UBQLN2   | KCNMB2   |
| PRPH     | C16orf45 |
| PHLDA3   | PPP2R2B  |
| AKAP13   | GALNT15  |
| ZNF281   | UST      |
| LAT2     | ZNF331   |
| MID2     | SLC39A13 |
| MYCT1    | KIAA1462 |
| GRIA2    | LIMS2    |
| ERRFI1   | SEC31A   |
| TEK      | VCL      |
| CLSTN1   | FAM63B   |
| KIAA0247 | GPC1     |
| STEAP4   | CCL8     |
| EFHC1    | DUSP5    |
| KRT19    | MAP1LC3B |
| TPRG1L   | PIEZO2   |
| RASSF4   | APOD     |
| AMPH     | GLG1     |
| COLEC10  | TMEM8A   |
| ADAMTSL3 | UNC93B1  |
| C1QTNF7  | CNTNAP1  |
| PLCD3    | CD36     |
| SPINT1   | SGCD     |
| SLC27A6  | TXNIP    |
| KCNMB2   | DYNLT3   |
| C16orf45 | TNFSF8   |
| PPP2R2B  | IGSF5    |
| GALNT15  | SLC24A2  |
| UST      | THSD4    |

|          |          |
|----------|----------|
| ZNF331   | C7       |
| SLC39A13 | CLEC1A   |
| VGLL1    | GLI3     |
| KIAA1462 | PPP1R15A |
| LIMS2    | NALCN    |
| SEC31A   | TBC1D9   |
| VCL      | CHST14   |
| FAM63B   | ADD1     |
| GPC1     | PELO     |
| CCL8     | GJB2     |
| DUSP5    | LILRA2   |
| MAP1LC3B | CD4      |
| PIEZO2   | CITED2   |
| APOD     | C1orf216 |
| GLG1     | TP73-AS1 |
| TMEM8A   | WDR45    |
| UNC93B1  | LRRC4C   |
| CNTNAP1  | USP11    |
| CD36     | DDIT3    |
| ZNF185   | PCDHB7   |
| SGCD     | TMED4    |
| TXNIP    | PLVAP    |
| DYNLT3   | LY96     |
| TNFSF8   | CXCR4    |
| IGSF5    | PAX8     |
| SLC24A2  | ISCU     |
| THSD4    | TM4SF1   |
| C7       | NDST1    |
| CLEC1A   | SOX15    |
| GLI3     | JAKMIP2  |
| PPP1R15A | NCKAP5L  |
| NALCN    | LPL      |
| TBC1D9   | FHL2     |



|          |           |
|----------|-----------|
| CHST14   | FEZ1      |
| ADD1     | NR3C1     |
| PELO     | EFNB2     |
| GJB2     | ADCYAP1R1 |
| LILRA2   | FOSL2     |
| CD4      | CLEC11A   |
| CITED2   | ALDH1L2   |
| C1orf216 | CACNA2D4  |
| TP73-AS1 | MAPKAPK2  |
| WDR45    | FRMD4A    |
| LRRC4C   | PBX1      |
| USP11    | AHR       |
| DDIT3    | RBPM5     |
| PCDHB7   | MURC      |
| TMED4    | PSAP      |
| PLVAP    | CAPZB     |
| LY96     | DYRK3     |
| CXCR4    | EYA4      |
| PAX8     | PACS1     |
| ISCU     | BMP4      |
| TM4SF1   | NRBF2     |
| NDST1    | GOLGA2    |
| SOX15    | TRPV2     |
| JAKMIP2  | NPTN      |
| NCKAP5L  | CCDC88A   |
| LPL      | ZNF365    |
| FHL2     | TLN1      |
| FEZ1     | ADAMTS3   |
| NR3C1    | SAMD4A    |
| EFNB2    | MICAL2    |
| ADCYAP1R | NEFM      |
| FOSL2    | PURA      |
| CLEC11A  | ACSS3     |

|          |           |
|----------|-----------|
| GJB3     | CRABP2    |
| ALDH1L2  | CREM      |
| CACNA2D4 | ENDOD1    |
| MAPKAPK2 | SH3PXD2A  |
| FRMD4A   | PCED1B    |
| PBX1     | TCEA2     |
| AHR      | HTR7P1    |
| RBPMS    | TFEB      |
| MURC     | PDZD2     |
| PSAP     | LRRC17    |
| CAPZB    | SUSD4     |
| PAEP     | LRCH3     |
| DYRK3    | GPRC5B    |
| EYA4     | ACADVL    |
| PACS1    | NTAN1     |
| BMP4     | ABHD2     |
| NRBF2    | YAP1      |
| GOLGA2   | EBF4      |
| TRPV2    | NAV1      |
| NPTN     | NDEL1     |
| CCDC88A  | TNFSF4    |
| ZNF365   | TMEM30A   |
| TLN1     | SNN       |
| ADAMTS3  | FOSB      |
| SAMD4A   | HMOX1     |
| MICAL2   | SDCCAG8   |
| NEFM     | CCNA1     |
| PURA     | PLAUR     |
| ACSS3    | GABARAPL1 |
| CRABP2   | KLF2      |
| CREM     | ZNRF1     |
| ENDOD1   | BCL9L     |
| SH3PXD2A | MEF2D     |

|           |           |
|-----------|-----------|
| PCED1B    | RGCC      |
| TCEA2     | CNGA3     |
| HTR7P1    | TNFRSF12A |
| TFEB      | GRAMD1B   |
| PDZD2     | HTR1F     |
| LRRC17    | PCDHB10   |
| SUSD4     | TSPAN2    |
| LRCH3     | TMEM136   |
| GPRC5B    | SASH1     |
| ACADVL    | GPR161    |
| NTAN1     | UNC5C     |
| ABHD2     | LAMA5     |
| YAP1      | NGFRAP1   |
| EBF4      | AP3M2     |
| NAV1      | NTSR1     |
| NDEL1     | GPRASP1   |
| TNFSF4    | ZNF532    |
| TMEM30A   | BRI3      |
| SNN       | MBD5      |
| FOSB      | TP53BP1   |
| HMOX1     | LIX1L     |
| SDCCAG8   | PKM       |
| CCNA1     | CALHM2    |
| PLAUR     | MAGED2    |
| GABARAPL  | SLC2A10   |
| KLF2      | SLC35G2   |
| ZNRF1     | COL13A1   |
| BCL9L     | CASC1     |
| MEF2D     | BEX4      |
| RGCC      | CD93      |
| CNGA3     | STON1     |
| TNFRSF12/ | ISYNA1    |
| GRAMD1B   | IGSF10    |

|         |          |
|---------|----------|
| HTR1F   | PRPF8    |
| PCDHB10 | AIF1     |
| TSPAN2  | PRKD1    |
| TMEM136 | ARHGAP29 |
| SASH1   | GPR116   |
| GPR161  | GAD2     |
| UNC5C   | RBFOX2   |
| LAMA5   | ALCAM    |
| NGFRAP1 | PTHLH    |
| AP3M2   | ISG15    |
| NTSR1   | YIPF5    |
| GPRASP1 | CFH      |
| ZNF532  | ARHGEF6  |
| BRI3    | PTX3     |
| MBD5    | BBX      |
| TP53BP1 | GRP      |
| LIX1L   | FJX1     |
| PKM     | PLXND1   |
| CALHM2  | OAZ2     |
| RIMBP2  | SLIT3    |
| MAGED2  | CNIH3    |
| SLC2A10 | LIF      |
| SLC35G2 | LRRC8A   |
| COL13A1 | SOX5     |
| CASC1   | SLC15A3  |
| WFDC3   | MAP3K6   |
| BEX4    | CAMTA2   |
| CD93    | RHOQ     |
| STON1   | LSAMP    |
| ISYNA1  | CNTN4    |
| IGSF10  | PRPH2    |
| PRPF8   | FBXL5    |
| AIF1    | TUBB2A   |

|          |         |
|----------|---------|
| PRKD1    | LPAR1   |
| ARHGAP29 | RNH1    |
| GPR116   | STK17A  |
| GAD2     | ECSCR   |
| RBFOX2   | BCL6    |
| ALCAM    | ZBTB4   |
| PTHLH    | ZNF275  |
| GAS6     | PRRG1   |
| ISG15    | HEXA    |
| YIPF5    | DZIP1   |
| CFH      | NPR3    |
| ARHGEF6  | SSH1    |
| PTX3     | HSD17B2 |
| BBX      | CHD3    |
| GRP      | CHODL   |
| FJX1     | TBX15   |
| PLXND1   | CCM2L   |
| OAZ2     | EZR     |
| SLIT3    | PRDM6   |
| CNIH3    | ASAP2   |
| LIF      | METRN   |
| LRRC8A   | NEFH    |
| SOX5     | ZNF436  |
| SLC15A3  | DOK5    |
| MAP3K6   | TK2     |
| CAMTA2   | CTF1    |
| RHOQ     | ITPKB   |
| LSAMP    | PPP2CB  |
| CNTN4    | PDE2A   |
| PRPH2    | MEGF10  |
| FBXL5    | FOXF2   |
| TUBB2A   | CAMSAP2 |
| LPAR1    | SUGCT   |

|         |          |
|---------|----------|
| RNH1    | LHFPL2   |
| STK17A  | PLEKHO2  |
| ECSCR   | NCK2     |
| BCL6    | ADORA3   |
| ZBTB4   | AHNAK    |
| ZNF275  | ACYP2    |
| PRRG1   | HSPA12B  |
| HEXA    | PDGFRL   |
| DZIP1   | KLHL21   |
| NPR3    | JAZF1    |
| SSH1    | TMTC1    |
| HTR2C   | ZFHX4    |
| HSD17B2 | ITPRIPL2 |
| CHD3    | DUSP6    |
| CHODL   | ASPHD1   |
| TBX15   | RIT1     |
| CCM2L   | ARHGAP33 |
| EZR     | TEAD2    |
| PRDM6   | ZNF134   |
| ASAP2   | ARHGAP1  |
| METRN   | VKORC1   |
| NEFH    | PPP1R12B |
| ZNF436  | SRGAP2   |
| DOK5    | MAP4K4   |
| TK2     | NRXN1    |
| CTF1    | P4HA3    |
| ITPKB   | NT5E     |
| PPP2CB  | RARB     |
| PDE2A   | ZHX2     |
| MEGF10  | COL16A1  |
| FOXF2   | RIMKLB   |
| CAMSAP2 | C1orf198 |
| SUGCT   | NREP     |

LHFPL2 SPTAN1  
PLEKHO2 ETV1  
NCK2 TGFA  
ADORA3 CRIP2  
AHNAK ANO2  
ACYP2 UBE2E3  
HSPA12B CDH6  
PDGFRL FAM124B  
KLHL21 FAM49A  
JAZF1 LTBP4  
TMTC1 ABCC9  
ZFHX4 PTN  
ITPRIPL2 CPNE8  
DUSP6 STX2  
MROH6 ZFP28  
ASPHD1 MAST4  
RIT1 PARVG  
ARHGAP33 FAM46A  
TEAD2 BACH1-IT1 ||| BACH1  
ZNF134 TCEAL1  
ARHGAP1 TBX2  
VKORC1 STOX2  
PPP1R12B TEAD1  
SRGAP2 SLC7A7  
MAP4K4 CDKN2C  
NRXN1 IQGAP1  
P4HA3 INHBB  
NT5E C1RL  
RARB KIAA1644  
ZHX2 VSIG4  
COL16A1 WBP5  
RIMKLB ERG  
C1orf198 SYT11

|           |         |
|-----------|---------|
| NREP      | TENM4   |
| SPTAN1    | ELFN2   |
| ETV1      | S100A13 |
| TGFA      | NAB2    |
| CRIP2     | GULP1   |
| ANO2      | PLA2G5  |
| UBE2E3    | PPP1R3C |
| CDH6      | ST3GAL6 |
| FAM124B   | MEIS2   |
| FAM49A    | PTPRZ1  |
| LTBP4     | NFATC4  |
| ABCC9     | ENOX1   |
| PTN       | C1orf54 |
| CPNE8     | HAO2    |
| STX2      | TOM1    |
| ZFP28     | C6orf15 |
| MAST4     | ZNF449  |
| PARVG     | LONRF2  |
| CAPN12    | HES4    |
| FAM46A    | PCDHB4  |
| BACH1-IT1 | RASSF5  |
| TCEAL1    | TLE4    |
| TBX2      | POLM    |
| STOX2     | EGFLAM  |
| TEAD1     | ELTD1   |
| SLC7A7    | CCDC8   |
| CDKN2C    | PLEKHO1 |
| IQGAP1    | ALPL    |
| INHBB     | MYH9    |
| C1RL      | PCDHB15 |
| KIAA1644  | PBXIP1  |
| VSIG4     | PTGFRN  |
| WBP5      | ANGPT1  |



|         |               |
|---------|---------------|
| ERG     | CYR1          |
| SYT11   | TMEM47        |
| TENM4   | RDX           |
| ELFN2   | ZNF677        |
| S100A13 | TRIM8         |
| NAB2    | SCARF1        |
| GULP1   | NKX3-2        |
| PLA2G5  | IDS           |
| PPP1R3C | GNS           |
| ST3GAL6 | RECK          |
| MEIS2   | ACE           |
| PTPRZ1  | CDC42BPA      |
| NFATC4  | TMEM200B      |
| ENOX1   | RNF207        |
| C1orf54 | PTMS          |
| HAO2    | HOXB2         |
| TOM1    | ZIM2     PEG3 |
| C6orf15 | ERC1          |
| ZNF449  | C1QTNF3       |
| LONRF2  | PRMT2         |
| HES4    | EHBP1         |
| PCDHB4  | PREX2         |
| RASSF5  | ZNF423        |
| TLE4    | RBPM2         |
| POLM    | NAV3          |
| EGFLAM  | LRCH1         |
| ELTD1   | FAM195B       |
| CCDC8   | SCN4B         |
| PLEKHO1 | MSANTD3       |
| ALPL    | CCDC85A       |
| FBXL14  | VWF           |
| MYH9    | SCARF2        |
| PCDHB15 | TCEAL7        |

|          |                       |
|----------|-----------------------|
| PBXIP1   | GPR87                 |
| PTGFRN   | TSHZ2                 |
| ANGPT1   | NDUFAF1               |
| CYR1     | CSTB                  |
| TMEM47   | PAPSS1                |
| RDX      | PCSK5                 |
| ZNF677   | SFXN3                 |
| TRIM8    | INMT     INMT-FAM188B |
| SCARF1   | MTMR9                 |
| NKX3-2   | PIP4K2A               |
| IDS      | RASIP1                |
| GNS      | MMRN2                 |
| RECK     | IRF2BPL               |
| ACE      | IL10RB                |
| CDC42BPA | TREM2                 |
| TMEM200  | HTRA3                 |
| RNF207   | SDS                   |
| PTMS     | VAT1L                 |
| MAGI2    | LETM2                 |
| HOXB2    | KIF7                  |
| ZIM2     | PNAP1L3               |
| ERC1     | MARCO                 |
| C1QTNF3  | MAPKBP1               |
| PRMT2    | PLSCR4                |
| EHBP1    | MEF2A                 |
| PREX2    | LRP10                 |
| ZNF423   | CD99                  |
| BPMS2    | FXYD1                 |
| NAV3     | CHST7                 |
| LRCH1    | ACKR3                 |
| FAM195B  | ROBO4                 |
| SCN4B    | KANK4                 |
| MSANTD3  | SPTBN5                |

|         |           |
|---------|-----------|
| CCDC85A | COL22A1   |
| VWF     | PLS3      |
| SCARF2  | TUBG2     |
| TCEAL7  | SPRY4     |
| GPR87   | CHRD      |
| TSHZ2   | LINC00478 |
| NDUFAF1 | SH3GLB1   |
| CSTB    | CDC42EP3  |
| PAPSS1  | ANXA1     |
| PCSK5   | PCDH9     |
| SFXN3   | TLR5      |
| INMT    | C4orf47   |
| MTMR9   | PHYHD1    |
| PIP4K2A | FBXL3     |
| RASIP1  | FAM65A    |
| MMRN2   | ANKRD35   |
| IRF2BPL | PPM1F     |
| IL10RB  | CREBRF    |
| TREM2   | RAB8B     |
| HTRA3   | MLLT11    |
| SDS     | PCGF2     |
| VAT1L   | ICMT      |
| LETM2   | MED15     |
| KIF7    | RIOK3     |
| NAP1L3  | TFE3      |
| MARCO   | CDKN2B    |
| MAPKBP1 | C19orf66  |
| PLSCR4  | OR1A1     |
| MEF2A   | RANBP9    |
| LRP10   | ILK       |
| CD99    | NEGR1     |
| FXD1    | UNC13D    |
| CHST7   | ISG20     |

|           |           |
|-----------|-----------|
| ACKR3     | KCNJ15    |
| ROBO4     | ITGB1BP2  |
| KANK4     | CCDC50    |
| SPTBN5    | MAN2B1    |
| ANXA3     | SLFN12    |
| COL22A1   | AGPAT4    |
| PLS3      | TMEM55A   |
| TUBG2     | ARSI      |
| SPRY4     | BICD2     |
| CHRD      | RASGRP3   |
| LINC00478 | HAND2-AS1 |
| SH3GLB1   | SLC20A2   |
| PPL       | FAM19A2   |
| CDC42EP3  | TMEM140   |
| ANXA1     | PRKG1     |
| PCDH9     | CD59      |
| TLR5      | CYP27C1   |
| C4orf47   | SNCA      |
| PHYHD1    | GYPC      |
| FBXL3     | FHOD3     |
| FAM65A    | CHSY3     |
| ANKRD35   | ROR1      |
| PPM1F     | SH3KBP1   |
| CREBRF    | TREM1     |
| RAB8B     | CD33      |
| MLLT11    | APLNR     |
| PCGF2     | ZFYVE1    |
| ICMT      | DVL3      |
| MED15     | PLK2      |
| RIOK3     | GPC6      |
| BAIAP2    | GNB5      |
| TFE3      | SYN1      |
| CDKN2B    | 36951     |

|          |          |
|----------|----------|
| C19orf66 | PLCD4    |
| OR1A1    | ECE1     |
| RANBP9   | VASH1    |
| ILK      | REEP3    |
| NEGR1    | RNF144B  |
| UNC13D   | STX12    |
| ISG20    | ARHGEF37 |
| KCNJ15   | MFNG     |
| ITGB1BP2 | KCNJ8    |
| CCDC50   | SMAD7    |
| MAN2B1   | SLC9A9   |
| SLFN12   | PRND     |
| AGPAT4   | WDFY3    |
| TMEM55A  | SIRPB1   |
| ARSI     | ARRDC3   |
| BICD2    | HIGD1B   |
| RASGRP3  | SLC11A1  |
| HAND2-AS | SERPINA5 |
| SLC20A2  | SUSD2    |
| FAM19A2  | CD81     |
| TMEM140  | LYRM5    |
| PRKG1    | UBXN6    |
| CD59     | LAPTM4A  |
| CYP27C1  | CDYL2    |
| SNCA     | DDAH2    |
| GYPC     | NCOR2    |
| FHOD3    | SV2A     |
| CHSY3    | CPXM2    |
|          | SH3BGRL  |
| ROR1     | CRAT     |
| SH3KBP1  | RHBDD2   |
| TREM1    | CREB3    |
| CD33     | MAGED1   |

|          |           |
|----------|-----------|
| APLNR    | ADAM9     |
| ZFYVE1   | FKBP8     |
| DVL3     | SOX11     |
| PLK2     | VTCN1     |
| GPC6     | CDK2AP1   |
| GNB5     | SMPD1     |
| SYN1     | GRIK2     |
| mar-01   | SGK1      |
| PLCD4    | CDKN2A    |
| ECE1     | DDHD2     |
| VASH1    | KIAA1024  |
| REEP3    | IBSP      |
| RNF144B  | PPAPDC3   |
| STX12    | MIR22HG   |
| ARHGEF37 | WT1-AS    |
| MFNG     | SCG5      |
| KCNJ8    | FAM46B    |
| SMAD7    | HSPB1     |
| SLC9A9   | ARMCX3    |
| PRND     | NR1D2     |
| WDFY3    | UBE2QL1   |
| SIRPB1   | ZYX       |
| ARRDC3   | AVPR1A    |
| HIGD1B   | PLEKHA5   |
| SLC11A1  | RNF11     |
| SERPINA5 | NR2F1-AS1 |
| SUSD2    | SLC17A5   |
| CD81     | RNF7      |
| LYRM5    | RND2      |
| UBXN6    | SH3BGRL3  |
| LAPTM4A  | AGRN      |
| CDYL2    | FLNC      |
| DDAH2    | CARD6     |

|          |          |
|----------|----------|
| NCOR2    | NAP1L2   |
| SV2A     | EHD3     |
| CPXM2    | FXYD5    |
| SH3BGRL  | RRAS     |
| CRAT     | FGD6     |
| RHBDD2   | SNX9     |
| CREB3    | CDC42BPB |
| MAGED1   | TMEM106A |
| ADAM9    | IP6K3    |
| FKBP8    | PEAR1    |
| SOX11    | TSPYL2   |
| VTCN1    | FCN1     |
| CDK2AP1  | WWC3     |
| LINGO1   | PLA2G16  |
| SMPD1    | RELL1    |
| GRIK2    | RUFY3    |
| SGK1     | ITSN1    |
| CDKN2A   | LRFN5    |
| DDHD2    | LEPRE1   |
| KIAA1024 | FAT3     |
| IBSP     | SCG2     |
| PPAPDC3  | PI15     |
| MIR22HG  | LZTS1    |
| WT1-AS   | BATF     |
| SCG5     | RSPO3    |
| FAM46B   | ARL6IP5  |
| HSPB1    | CBX4     |
| ARMCX3   | MRGPRF   |
| NR1D2    | LY6H     |
| UBE2QL1  | LYPD1    |
| ZYX      | TPM1     |
| AVPR1A   | TRAPPC6B |
| PLEKHA5  | KLF7     |

|           |           |
|-----------|-----------|
| RNF11     | SKAP1     |
| NR2F1-AS1 | SH2B3     |
| SLC17A5   | ALPP      |
| RNF7      | C10orf54  |
| RND2      | TRIOBP    |
| SH3BGRL3  | ARL10     |
| AGRN      | TUB       |
| FLNC      | AAED1     |
| CARD6     | ARHGDIB   |
| NAP1L2    | USP51     |
| EHD3      | FAM107A   |
| FXD5      | C10orf128 |
| RRAS      | SIGLEC7   |
| FGD6      | THEMIS2   |
| SNX9      | BTBD16    |
| CDC42BPB  | C10orf25  |
| TMEM106   | FAXDC2    |
| IP6K3     | VIMP      |
| PEAR1     | FAM198A   |
| TSPYL2    | SLC39A1   |
| FCN1      | C14orf37  |
| WWC3      | NPAS3     |
| PLA2G16   | NOS1      |
| RELL1     | SNX29     |
| RUFY3     | AP3B2     |
| ITSN1     | VGLL3     |
| LRFN5     | FAM50A    |
| LEPRE1    | KCTD1     |
| FAT3      | LPP       |
| SCG2      | SYNGR1    |
| PI15      | MARK4     |
| LZTS1     | LYST      |
| BATF      | RASGRF2   |



|           |          |
|-----------|----------|
| RSPO3     | ATF3     |
| ARL6IP5   | CD14     |
| CBX4      | NPC2     |
| MRGPRF    | CCR1     |
| LY6H      | SGMS2    |
| LYPD1     | RASSF2   |
| TPM1      | BCL2L1   |
| TRAPPC6B  | SLC46A3  |
| KLF7      | CCPG1    |
| SKAP1     | PTPN12   |
| SH2B3     | C19orf59 |
| ALPP      | FBXO32   |
| C10orf54  | GLI1     |
| TRIOBP    | FLT4     |
| ARL10     | CTNNA1   |
| TUB       | DCLK1    |
| AAED1     | PDE1A    |
| ARHGDIB   | MAP4     |
| USP51     | YWHAE    |
| FAM107A   | P2RX7    |
| C10orf128 | VEGFB    |
| SIGLEC7   | CCDC92   |
| THEMIS2   | ITGAM    |
| BTBD16    | MEF2C    |
| C10orf25  | HCK      |
| FAXDC2    | WBP1L    |
| VIMP      | ZNF404   |
| FAM198A   | ZFPM2    |
| SLC39A1   | APOC1    |
| C14orf37  | SOX17    |
| NPAS3     | ADAMTS5  |
| NOS1      | PECAM1   |
| SNX29     | PHF1     |

|          |          |
|----------|----------|
| AP3B2    | TCEAL4   |
| VGLL3    | LZTS2    |
| FAM50A   | NCF2     |
| KCTD1    | SLA      |
| LPP      | ZFAND3   |
| SYNGR1   | ISM1     |
| MARK4    | HMCN1    |
| LYST     | ANGPTL4  |
| RASGRF2  | PPP2R4   |
| ATF3     | FAM89B   |
| CD14     | FILIP1   |
| NPC2     | CSF1R    |
|          | TCEAL8   |
| CCR1     | VAMP4    |
| SGMS2    | SLC16A3  |
| RASSF2   | FAM229B  |
| BCL2L1   | C5AR1    |
| SLC46A3  | TSPAN9   |
| CCPG1    | RNF150   |
| PTPN12   | KRAS     |
| KLK7     | CD163L1  |
| C19orf59 | CECR1    |
| FBXO32   | FKBP9    |
| EPHA2    | GALNT1   |
| GLI1     | LEPR     |
| FLT4     | NLRP1    |
| CTNNA1   | SNX3     |
| DCLK1    | RGS4     |
| PDE1A    | GLRB     |
| MAP4     | LAIR1    |
| YWHAE    | LMNA     |
| P2RX7    | IL10     |
| VEGFB    | CRISPLD1 |

|         |          |
|---------|----------|
| CCDC92  | SIGLEC1  |
| ITGAM   | LIMCH1   |
| MEF2C   | NFKB2    |
| HCK     | ZEB2     |
| WBP1L   | ITGA7    |
| ZNF404  | NPC1     |
| ZFPM2   | NCALD    |
| APOC1   | GJA4     |
| SOX17   | THSD7A   |
| ADAMTS5 | TNFRSF1A |
| PECAM1  | HIP1     |
| PHF1    | TRPC1    |
| TCEAL4  | SLC38A6  |
| LZTS2   | FBP1     |
| NCF2    | NGFR     |
| SLA     | SYNC     |
| ZFAND3  | SYCP2    |
| ISM1    | LAMP5    |
| HMCN1   | ABCA9    |
| ANGPTL4 | ZNF25    |
| PPP2R4  | EBF2     |
| FAM89B  | TBC1D1   |
| KRT17   | PIM1     |
| FILIP1  | TEAD3    |
| CSF1R   | SLC37A2  |
| TCEAL8  | GNA15    |
| VAMP4   | GUCY1A2  |
| SLC16A3 | CORO1A   |
| FAM229B | FGD1     |
| C5AR1   | JAM2     |
| TSPAN9  | MOSPD1   |
| RNF150  | TRERF1   |
| KRAS    | CPEB4    |

|          |          |
|----------|----------|
| CD163L1  | LRRC49   |
| SCGN     | WDR81    |
| CECR1    | CSRNP1   |
| FKBP9    | F8       |
| GALNT1   | PLCL1    |
| LEPR     | CD55     |
| NLRP1    | SERPINB2 |
| SNX3     | S100A3   |
| RGS4     | RERGL    |
| GLRB     | PHACTR1  |
| LAIR1    | MPRIP    |
| LMNA     | CAP2     |
| IL10     | IL20RB   |
| CRISPLD1 | ITPR1    |
| SIGLEC1  | UBE2G1   |
| LIMCH1   | PARP8    |
| NFKB2    | TPM4     |
| ZEB2     | SEMA3A   |
| ITGA7    | DCAF5    |
| NPC1     | IKBIP    |
| NCALD    | TTC9     |
| GJA4     | MS4A7    |
| THSD7A   | HSPA6    |
| KLK5     | POLR2A   |
| TNFRSF1A | PPM1M    |
| HIP1     | SIGLEC10 |
| TRPC1    | CAPN2    |
| SLC38A6  | LPXN     |
| FBP1     | ENO2     |
| NGFR     | DST      |
| SYNC     | RING1    |
| LAMA3    | GAA      |
| SYCP2    | AP2M1    |

|          |            |
|----------|------------|
| LAMP5    | NTN1       |
| ABCA9    | TENC1      |
| ZNF25    | ST6GALNAC5 |
| EBF2     | KIF1B      |
| TBC1D1   | PTTG1IP    |
| PIM1     | ETV5       |
| TEAD3    | TYROBP     |
| SLC37A2  | ALOX5AP    |
| EPS8L1   | DOCK4      |
| GNA15    | FES        |
| GUCY1A2  | MDFIC      |
| CORO1A   | SNHG14     |
| FGD1     | SPI1       |
| JAM2     | GAP43      |
| MOSPD1   | CSF3R      |
| TRERF1   | SPRED1     |
| CPEB4    | MEGF6      |
| LRRC49   | TTC7B      |
| WDR81    | ZNF385A    |
| FXYD4    | RBMS2      |
| CSRNP1   | ZNF83      |
| F8       | TNKS1BP1   |
| PLCL1    | PRKAB2     |
| CD55     | TINF2      |
| SERPINB2 | ENPP2      |
| S100A3   | CACNA2D1   |
| RERGL    | COPS7A     |
| PHACTR1  | PRICKLE2   |
| MPRIP    | MGAT1      |
| CAP2     | WDR7       |
| IL20RB   | PLN        |
| ITPR1    | KLC1       |
| SNX24    | TP53INP2   |

|          |         |
|----------|---------|
| UBE2G1   | OSBPL8  |
| PARP8    | PKN1    |
| TPM4     | 37316   |
| SEMA3A   | ESAM    |
| DCAF5    | CSRNP2  |
| IKBIP    | CCNI    |
| TTC9     | ULK2    |
| MS4A7    | SRPX2   |
| HSPA6    | PFDN5   |
| POLR2A   | RRAGA   |
| PPM1M    | PCDHB13 |
| SIGLEC10 | MYOT    |
| CAPN2    | QSOX1   |
| LPXN     | ARF4    |
| SLC22A18 | CTDNEP1 |
| ENO2     | WDR47   |
| DST      | ZNF697  |
| RING1    | VWDE    |
| GAA      | PINK1   |
| AP2M1    | COL24A1 |
| NTN1     | NOX4    |
| TENC1    | GLIS3   |
| ST6GALNA | ADCY2   |
| KIF1B    | RBP7    |
| PTTG1IP  | SCN3B   |
| ETV5     | C3AR1   |
| TYROBP   | RNF185  |
| ALOX5AP  | ITGA11  |
| DOCK4    | SAT2    |
| FES      | PRRG3   |
| MDFIC    | NRSN2   |
| SNHG14   | DAP     |
| SPI1     | C2orf74 |

|          |          |
|----------|----------|
| GAP43    | CYTL1    |
| CSF3R    | KLHL15   |
| SPRED1   | SCUBE2   |
| MEGF6    | TIE1     |
| TTC7B    | FST      |
| ZNF385A  | CPM      |
| RBMS2    | OR51E2   |
| ZNF83    | HBEGF    |
| TNKS1BP1 | DMPK     |
| PRKAB2   | ZFAND2A  |
| TINF2    | CD63     |
| ENPP2    | KCNB1    |
| CACNA2D1 | ESM1     |
| COPS7A   | FOSL1    |
| PRICKLE2 | TDRP     |
| MGAT1    | CDR2L    |
| WDR7     | CD300LF  |
| PLN      | PHLDB1   |
| KLC1     | HCFC2    |
| TP53INP2 | RRAGC    |
| OSBPL8   | CYLD     |
| PKN1     | TTYH3    |
| mar-02   | IVNS1ABP |
| ESAM     | MAOB     |
| KLK8     | KLRF1    |
| CSRNP2   | CDH5     |
| CCNI     | PI4KB    |
| ULK2     | ARAP3    |
| SRPX2    | TCP11L1  |
| PFDN5    | HOOK3    |
| RRAGA    | B3GNT9   |
| KCNN4    | MPPED2   |
| PCDHB13  | ARHGAP31 |

|         |          |
|---------|----------|
| MYOT    | PDZRN3   |
| QSOX1   | ANO5     |
| ARF4    | SNAP25   |
| CTDNBP1 | SCUBE3   |
| WDR47   | MS4A6A   |
| ZNF697  | SLMAP    |
| VWDE    | C2orf40  |
| PINK1   | PNMAL1   |
| COL24A1 | CCR10    |
| NOX4    | ZFH3     |
| GLIS3   | CALCRL   |
| ADCY2   | PPFIBP1  |
| RBP7    | WASF1    |
| SCN3B   | OPTN     |
| C3AR1   | APBB1    |
| RNF185  | CAND2    |
| ITGA11  | FAM120C  |
| SAT2    | TMEM107  |
| PRRG3   | ABI3BP   |
| NRSN2   | ZNF117   |
| DAP     | SOX4     |
| C2orf74 | ATP6V1D  |
| CYTL1   | LAMP2    |
| KLHL15  | TRPC4    |
| SCUBE2  | ANKDD1A  |
| TIE1    | CCBE1    |
| FST     | PRAF2    |
| CPM     | FOXC1    |
| OR51E2  | NLGN4X   |
| HBEGF   | PCOLCE2  |
| RASAL1  | C11orf68 |
| DMPK    | PJA1     |
| ZFAND2A | FTH1     |



|          |          |
|----------|----------|
| CD63     | PPP4R1   |
| KCNB1    | GPR137B  |
| ESM1     | NDUFA4L2 |
| FOSL1    | ARHGAP10 |
| TDRP     | RRAGB    |
| CDR2L    | RHOC     |
| CD300LF  | ECM2     |
| PHLDB1   | TRIP10   |
| HCFC2    | ZSWIM4   |
| RRAGC    | DAPK1    |
| CYLD     | STX8     |
| TTYH3    | AR       |
| IVNS1ABP | TMEM255A |
| MAOB     | SDPR     |
| KLRF1    | DNAJC1   |
| LEMD1    | C1QC     |
| CDH5     | JPH2     |
| PI4KB    | KIAA1377 |
| ARAP3    | DCTN2    |
| KCNK3    | ABCA13   |
| TCP11L1  | GPBAR1   |
| HOOK3    | HSPB7    |
| RNF39    | CX3CR1   |
| B3GNT9   | DNER     |
| MPPED2   | CCNG2    |
| ARHGAP31 | SLC16A6  |
| PDZRN3   | CD72     |
| ANO5     | SRGAP1   |
| SNAP25   | CALB2    |
| SCUBE3   | NDFIP1   |
| MS4A6A   | RTN2     |
| SLMAP    | MMP16    |
| C2orf40  | TNIP1    |

PNMAL1 KLF12  
CCR10 HIVEP3  
ZFHX3 DMXL2  
TTLL7  
HIST2H2BE PCDHGA4  
CALCRL SYNDIG1  
PPFIBP1 BACH2  
WASF1 SLC16A2  
OPTN DYNC1LI2  
APBB1 SOX18  
LMO7 RFTN2  
CAND2 SLCO2A1  
FAM120C KIDINS220  
TMEM107 PCDH17  
ABI3BP GADD45A  
ZNF117 PDZRN4  
SOX4 VASN  
ATP6V1D TM4SF18  
LAMP2 LMOD1  
TRPC4 EMCN  
ANKDD1A KCTD11  
CCBE1 ABLIM3  
C1orf116 EVI2B  
PSORS1C1 MAPRE2  
PRAF2 VPS18  
FOXC1 AQP1  
NLGN4X NEK7  
PCOLCE2 PLEC  
C11orf68 EFHD1  
PJA1 TMSB15A ||| TMSB15B  
FTH1 EPHB6  
PPP4R1 ZNF382  
GPR137B ABCG2

NDUFA4L2 EMC4  
ARHGAP1C FNDC4  
RRAGB CORIN  
RHOC RERG  
ECM2 IGFL1  
GPRC5A MDK  
SEZ6L2 SMAD3  
TRIP10 CTDSP1  
ZSWIM4 DPYD  
DAPK1 PILRA  
STX8 HAS2  
AR GRN  
TMEM255, GYG1  
SDPR C6orf89  
DNAJC1 CD84  
C1QC BEAN1  
JPH2 TLR7  
KIAA1377 ZNF580  
DCTN2 GGTA1P  
ABCA13 MYO1C  
GPBAR1 C1QA  
HSPB7 PDE7B  
CX3CR1 DIXDC1  
DNER FLI1  
CCNG2 ANKRD6  
SLC16A6 CADM1  
CD72 RAB38  
SRGAP1 CLIC2  
CALB2 YPEL5  
NDFIP1 SLC44A2  
RTN2 KCNT2  
MMP16 CORO2B  
TNIP1 ARF3

|           |          |
|-----------|----------|
| KLF12     | RILPL1   |
| HIVEP3    | C1orf51  |
| DMXL2     | HDAC7    |
| TLL7      | ZNF667   |
| PCDHGA4   | SEC14L1  |
| SYNDIG1   | FIGN     |
| C19orf33  | RYR1     |
| BACH2     | TERF2IP  |
| SLC16A2   | HECW2    |
| DYNC1LI2  | CHRNA1   |
| SOX18     | EPYC     |
| RFTN2     | ARNT2    |
| SLCO2A1   | SYT17    |
| KIDINS220 | PLP1     |
| PCDH17    | BVES     |
| GADD45A   | PHF23    |
| PDZRN4    | KIAA0040 |
| VASN      | ZNF641   |
| TM4SF18   | LAPTM5   |
| LMOD1     | WNK1     |
| EMCN      | NRIP3    |
| KCTD11    | AKR1C1   |
| ABLIM3    | PALMD    |
| EVI2B     | CLIP3    |
| MAPRE2    | COL21A1  |
| VPS18     | NHSL2    |
| AQP1      | RAB2B    |
| NEK7      | PGM2L1   |
| PLEC      | MATN3    |
| EFHD1     | CALCOCO1 |
| TMSB15A   | TM6SF1   |
| EPHB6     | KLF6     |
| ZNF382    | ZNF542   |

|         |                |
|---------|----------------|
| ABCG2   | XKR4           |
| GDPD3   | HAS1           |
| EMC4    | PPM1L          |
| FNDC4   | ACTG1     ACTB |
| CORIN   | CSGALNACT1     |
| RERG    | ACTC1          |
| IGFL1   | ZNF829         |
| MDK     | OS9            |
| SMAD3   | ERMN           |
| KLK10   | ARHGAP20       |
| CTDSP1  | KIAA1549L      |
| DPYD    | OSCAR          |
| PILRA   | MCOLN1         |
| HAS2    | AVEN           |
| GRN     | NR1H2          |
| GYG1    | LCA5           |
| C6orf89 | ANKRD52        |
| CD84    | AK5            |
| BEAN1   | RCBTB2         |
| TLR7    | APBB1IP        |
| SLC20A1 | HPGDS          |
| ZNF580  | PHF13          |
| GGTA1P  | TNIK           |
| MYO1C   | PCDH19         |
| C1QA    | ZNF853         |
| PDE7B   | FAM219B        |
| DIXDC1  | RNASE6         |
| FLI1    | RIMS2          |
| ANKRD6  | OBFC1          |
| CADM1   | SLC7A2         |
| RAB38   | COLGALT2       |
| CLIC2   | NDP            |
| YPEL5   | HCFC1R1        |

|          |           |
|----------|-----------|
| SLC44A2  | LARP6     |
| KCNT2    | ZNF304    |
| CORO2B   | SOX7      |
| ARF3     | TANC2     |
| RILPL1   | INPP4B    |
| C1orf51  | SLC22A17  |
| HDAC7    | ATP8B2    |
| ZNF667   | ORAI3     |
| SEC14L1  | SOCS5     |
| FIGN     | PALM2     |
| RYR1     | TPRG1     |
| TERF2IP  | LTBP3     |
| HECW2    | NFE2L1    |
| CHRNA1   | MMP8      |
| KLK11    | CDA       |
| KLK6     | HECTD2    |
| EPYC     | LYVE1     |
| ARNT2    | DUSP4     |
| SCEL     | GPM6B     |
| SYT17    | WAS       |
| PLP1     | GAL3ST4   |
| KCNJ16   | C1orf123  |
| BVES     | NINJ2     |
| PHF23    | ZBED2     |
| KIAA0040 | CD163     |
| ZNF641   | CNTN1     |
| LAPTM5   | SIPA1     |
| WNK1     | MIDN      |
| NRIP3    | MMP28     |
| AKR1C1   | PLAC9     |
| PALMD    | FGF1      |
| KRT80    | FMO1      |
| CLIP3    | SECISBP2L |

COL21A1 PCDHB2  
NHSL2 GCNT2  
RAB2B ZNF257  
PGM2L1 DOK6  
MATN3 HOMER3  
CALCOCO1TENM3  
TM6SF1 ZFP82  
KLF6 AK1  
ZNF542 GNB1  
XKR4 PI4K2A  
HAS1 UBR4  
PPM1L STX11  
ACTG1 ||| ENTPD3  
CSGALNAC FPR3  
ACTC1 LPAR6  
ZNF829 SCG3  
OS9 CHRNA3  
ERMN FOXC2  
ARHGAP2C PCMTD1  
KIAA1549L DTWD1  
OSCAR PMEPA1  
MCOLN1 RNF180  
CAMK2N1 EFNA5  
AVEN CR1  
NR1H2 MAP2  
LCA5 PELI2  
ANKRD52 TBC1D19  
AK5 ST6GALNAC2  
RCBTB2 RAB3B  
APBB1P SLC22A15  
HPGDS C1orf122  
PHF13 TCEAL2  
TNIK HAVCR2

|          |          |
|----------|----------|
| PCDH19   | IER5L    |
| ZNF853   | CDH19    |
| FAM219B  | PCDHB18  |
| RNASE6   | FSTL3    |
| RIMS2    | GREM2    |
| OBFC1    | HSD17B14 |
| SLC7A2   | RAB5C    |
| COLGALT2 | FAM214B  |
| NDP      | DOC2B    |
| HCFC1R1  | KCNMA1   |
| LARP6    | DOCK5    |
| ZNF304   | NRK      |
| SOX7     | DDIT4L   |
| TANC2    | ACTR1A   |
| INPP4B   | LRCH2    |
| SLC22A17 | GIMAP4   |
| ATP8B2   | HEY2     |
| ORAI3    | DDIT4    |
| SOCS5    | THRSP    |
| PALM2    | CNN1     |
| TPRG1    | AMIGO2   |
| LTBP3    | C1orf162 |
| NFE2L1   | VLDLR    |
| MMP8     | TCF7L1   |
| CDA      | POU6F1   |
| HECTD2   | CERK     |
| LYVE1    | STMN2    |
| DUSP4    | SCRG1    |
| GPM6B    | C3orf18  |
| WAS      | RHBDF1   |
| GAL3ST4  | F13A1    |
| C1orf123 | SAV1     |
| KRT6A    | KDM5B    |



|           |           |
|-----------|-----------|
| NINJ2     | LGMN      |
| ZBED2     | EPB41L4A  |
| CD163     | OMD       |
| CNTN1     | GPAT2     |
| SIPA1     | ITGB2     |
| MIDN      | SEC11A    |
| MMP28     | KCNAB1    |
| PLAC9     | FGF7      |
| FGF1      | MS4A4A    |
| FMO1      | AKR1C2    |
| SECISBP2L | MSR1      |
| PCDHB2    | RASSF9    |
| GCNT2     | ZNF366    |
| ZNF257    | VAV2      |
| DOK6      | MAN2B2    |
| HOMER3    | IL10RA    |
| TENM3     | FKBP1B    |
| ZFP82     | PLIN3     |
| DISP2     | FGF2      |
| AK1       | FCER1G    |
| GNB1      | FAM13C    |
| PI4K2A    | MRC1      |
| UBR4      | PLCG2     |
| STX11     | GNPDA2    |
| ENTPD3    | NOV       |
| FPR3      | GPR183    |
| LPAR6     | EPHA4     |
| SCG3      | HIST1H2AC |
| CHRNA3    | GABARAP   |
| FOXC2     | CTSZ      |
| PCMTD1    | ANO1      |
| DTWD1     | TRAPPC1   |
| PMEPA1    | TRNP1     |

|          |         |
|----------|---------|
| RNF180   | BHMT2   |
| EFNA5    | EMX2    |
| CR1      | MUC16   |
| MAP2     | SLC16A4 |
| PELI2    | C1QTNF2 |
| TBC1D19  | EMILIN1 |
| ST6GALNA | TMEM35  |
| RAB3B    | RILPL2  |
| SLC22A15 | ZMAT1   |
| C1orf122 | MMP13   |
| TCEAL2   | MEOX2   |
| HAVCR2   | DKK2    |
| IER5L    | SIX1    |
| CDH19    | C1QB    |
| PCDHB18  | DOK3    |
| FSTL3    | CACNA1C |
| GREM2    | RAI2    |
| HSD17B14 | FPR1    |
| RAB5C    | CST6    |
| FAM214B  | PYGM    |
| DOC2B    | ANGPTL1 |
| KCNMA1   | TNFSF12 |
| DOCK5    | IL1RN   |
| NRK      | TULP3   |
| DDIT4L   | DCTN3   |
| ACTR1A   | AFAP1L1 |
| LRCH2    | CHL1    |
| GIMAP4   | GUK1    |
| HEY2     | GSTM3   |
| DDIT4    | RHOG    |
| THRSP    | SNX1    |
| CNN1     | FMO2    |
| AMIGO2   | DOCK10  |

|          |           |
|----------|-----------|
| C1orf162 | TMEM127   |
| VLDLR    | LRP12     |
| TCF7L1   | CD86      |
| POU6F1   | SSC5D     |
| CERK     | PRIMA1    |
| STMN2    | MALL      |
| SCRG1    | ZNF805    |
| C3orf18  | ULBP2     |
| RHBDF1   | CGNL1     |
| F13A1    | FAM214A   |
| SAV1     | HOXA5     |
| KDM5B    | RGS19     |
| LGMN     | FBXO10    |
| EPB41L4A | CCL7      |
| OMD      | ST8SIA4   |
| GPAT2    | OLR1      |
| ITGB2    | PLEKHG1   |
| SEC11A   | HOXC10    |
| KCNAB1   | SERF2     |
| FGF7     | CTSD      |
| MS4A4A   | FCGR2B    |
| AKR1C2   | CA11      |
| MSR1     | SPOCD1    |
| RASSF9   | IGF1R     |
| ZNF366   | GABARAPL2 |
| VAV2     | PKHD1     |
| MAN2B2   | RNF115    |
| IL10RA   | SORCS1    |
| FKBP1B   | ADAMTS16  |
| PLIN3    | KCNA2     |
| SLC2A1   | ATP6AP2   |
| FGF2     | PELI1     |
| FCER1G   | CDIPT     |

|           |          |
|-----------|----------|
| FAM13C    | CD53     |
| MRC1      | PCDHB6   |
| PLCG2     | SMG6     |
| GNPDA2    | KIAA1279 |
| NOV       | RHOA     |
| GPR183    | GSTM5    |
| EPHA4     | ZNF781   |
| HIST1H2AC | IFNGR2   |
| GABARAP   | HTR2B    |
| CTSZ      | TTC7A    |
| ANO1      | UBE2H    |
| TRAPPC1   | PCDHB12  |
| TRNP1     | ADRB2    |
| BHMT2     | KCTD10   |
| EMX2      | FGF13    |
| MUC16     | CD37     |
| SLC16A4   | ZNF655   |
| C1QTNF2   | RMDN3    |
| EMILIN1   | CDKL5    |
| TMEM35    | BMF      |
| RILPL2    | DCUN1D3  |
| ZMAT1     | ANXA2    |
| MMP13     | ZNF471   |
| MEOX2     | LIFR     |
| DKK2      | NOVA1    |
| SIX1      | DIRAS3   |
| C1QB      | AGPAT1   |
| DOK3      | PODN     |
| CACNA1C   | GPR110   |
| RAI2      | MICU3    |
| FPR1      | RGAG4    |
| CST6      | RGS17    |
| PYGM      | NCKAP1L  |

ANGPTL1 ARPC2  
TNFSF12 PITPNM3  
IL1RN ADCY7  
TULP3 AGTR1  
DCTN3 KIFC3  
AFAP1L1 LMO3  
CHL1 GLDN  
GUK1 FAM168A  
GSTM3 ADPRM  
RHOG GPR158  
SNX1 HLA-DPA1  
FMO2 SLC14A1  
DOCK10 CAP1  
TMEM127 MFSD7  
LRP12 CRYZL1  
CD86 IL17RD  
SSC5D ANKRD65  
PRIMA1 LMF1  
MALL BICD1  
SCNN1A FCER1A  
ZNF805 HIST1H2BC ||| HIST1H2BE ||| HIST1H2BF ||| HIST1H2BG ||| HIST1H2BI  
ULBP2 RTN1  
CGNL1 SMOC2  
FAM214A DOCK2  
HOXA5 KRT7  
RGS19 CD74  
FBXO10 KATNAL1  
CCL7 ARHGEF25  
ST8SIA4 SERPINA3  
TM4SF4 ATP1A2  
OLR1 CHGB  
MSLN RNF181  
PLEKHG1 ST6GALNAC6

|          |          |
|----------|----------|
| HOXC10   | LRRK2    |
| SERF2    | TYRP1    |
| COL17A1  | LACTB    |
| CTSD     | MORN4    |
| FCGR2B   | BMPR1B   |
| CA11     | CPEB1    |
| SPOCD1   | STXBP1   |
| IGF1R    | FOXP2    |
| GABARAPL | CDO1     |
| PKHD1    | MFSD11   |
| RNF115   | MICU1    |
| SORCS1   | TNNT1    |
| ADAMTS1  | FOXJ2    |
| KCNA2    | AADAC    |
| ATP6AP2  | GPR34    |
| PELI1    | CD82     |
| CDIPT    | OR51E1   |
| CD53     | ZFP90    |
| PCDHB6   | EPHA7    |
| SMG6     | UBASH3B  |
| KIAA1279 | DTNA     |
| RHOA     | RAMP1    |
| GSTM5    | OLFM1    |
| ZNF781   | GJB5     |
| IFNGR2   | ADRA2A   |
| HTR2B    | MAMDC2   |
| FAM155A  | C5orf46  |
| TTC7A    | EVI2A    |
| UBE2H    | HIST1H1C |
| PCDHB12  | SRGN     |
| ADRB2    | FGFR2    |
| KCTD10   | PCDHB16  |
| FGF13    | ANXA2P2  |

|          |                   |
|----------|-------------------|
| CD37     | TRIM6             |
| ZNF655   | DKK1              |
| RMDN3    | MAP2K1            |
| CDKL5    | IGFL2             |
| BMF      | PTPRN2            |
| DCUN1D3  | RAI1              |
| ANXA2    | TLR1              |
| ZNF471   | SWAP70            |
| LIFR     | CACHD1            |
| NOVA1    | CPE               |
| DIRAS3   | ATL1              |
| AGPAT1   | MUM1L1            |
| PODN     | MYOCD             |
| GPR110   | PCDHB5            |
| MICU3    | SUN2              |
| RGAG4    | ACOT9             |
| RGS17    | PRKACB            |
| NCKAP1L  | POPDC2            |
| ARPC2    | PALM              |
| PITPNM3  | LDB3              |
| ADCY7    | NPY1R             |
| AGTR1    | FAM26E            |
| KIFC3    | ALOX5             |
| LMO3     | DARC              |
| GLDN     | CDH2              |
| FAM168A  | RAB11FIP5         |
| ADPRM    | SLC4A11           |
| GPR158   | SEMA4C            |
| HLA-DPA1 | DDX24             |
| SLC14A1  | DHRS9             |
| CAP1     | CLDN10            |
| MFSD7    | GNAI1             |
| CRYZL1   | FCGR1A     FCGR1B |

IL17RD RXRB  
ANKRD65 FOLR1  
LMF1 CLEC7A  
KRT6B C6orf1  
BICD1 C2orf76  
FCER1A STX5  
HIST1H2BC ANXA10  
RTN1 PKIA  
SMOC2 CMAHP  
DOCK2 FLOT1  
KRT7 COMMD1  
CD74 HOXC6  
KATNAL1 PIP5K1C  
ARHGEF25 ARPC1B  
SERPINA3 NECAP2  
ATP1A2 TMEM71  
CHGB MAGEL2  
RNF181 RRAGD  
ST6GALNA HBP1  
LRRK2 FLII  
TYRP1 ELOVL4  
LACTB CIC  
MORN4 FRMD5  
BMPR1B CLEC5A  
CPEB1 BCHE  
STXBP1 FLRT3  
FOXP2 AGPAT9  
CDO1 KLHDC1  
MFSD11 CYS1  
MICU1 FABP4  
TNNT1 CPA3  
FOXJ2 GSTA2 ||| GSTA1  
AADAC CLIC3



GPR34 GATM  
CD82 DPP4  
OR51E1 FLYWCH1  
ZFP90 C3orf14  
EPA7 SYT1  
UBASH3B PSMB6  
DTNA FRAS1  
RAMP1 TFF2  
OLFM1 UBC  
GJB5 SPRR1B  
ADRA2A SIX4  
MAMDC2 ADIPOQ  
C5orf46 ST6GAL2  
EVI2A GHR  
HIST1H1C TMPRSS3  
SRGN L1CAM  
FGFR2 SNX27  
PCDHB16 GDI1  
PLA2G10 PKIB  
ANXA2P2 NLRP2  
TRIM6 CALM3 ||| CALM2 ||| CALM1  
DKK1 NTRK2  
MAP2K1 ATP6V1E1  
IGFL2 MAGEA12  
PTPRN2  
RAI1  
MYBPC1  
TLR1  
SWAP70  
CACHD1  
CPE  
SFTA2  
ATL1

MUM1L1  
MYOCD  
SLPI  
PCDHB5  
SUN2  
ACOT9  
PRKACB  
POPDC2  
PALM  
LDB3  
NPY1R  
FAM26E  
ALOX5  
DARC  
VSIG2  
CDH2  
RAB11FIP5  
SLC4A11  
SEMA4C  
DDX24  
DHRS9  
CLDN10  
GNAI1  
FCGR1A ||| FCGR1B  
RHBDL2  
RXRB  
FOLR1  
CLEC7A  
C6orf1  
C2orf76  
STX5  
ANXA10  
PKIA

CMAHP  
FLOT1  
COMMD1  
HOXC6  
PIP5K1C  
ARPC1B  
NECAP2  
SERPINB5  
TMEM71  
MAGEL2  
RRAGD  
HBP1  
S100A2  
FLII  
ELOVL4  
CIC  
FRMD5  
CLEC5A  
BCHE  
FLRT3  
AGPAT9  
KLHDC1  
MMP7  
CTSE  
CYS1  
NXF3  
FABP4  
CPA3  
GSTA2 ||| GSTA1  
CLIC3  
GATM  
DPP4  
FLYWCH1

CLSTN2  
C3orf14  
SYT1  
PSMB6  
FRAS1  
TFF2  
UBC  
SPRR1B  
SIX4  
ADIPOQ  
ST6GAL2  
GHR  
TMPRSS3  
L1CAM  
SNX27  
GDI1  
HOXB8  
PKIB  
NLRP2  
CALM3 ||| CALM2 ||| CALM1  
NTRK2  
ATP6V1E1  
GABRP  
MAGEA12  
TACSTD2  
DUSP27

**Basal pancreatic cancer cells (Raghavan et al. 2021) YAP\_22 (Wang et al. 2021) Fetal (Mustata et al. 2013) coreHRC**

|         |          |         |            |
|---------|----------|---------|------------|
| KRT6A   | CYR61    | SPP1    | LAMB3      |
| S100A2  | CTGF     | GJA1    | SDCBP2     |
| KRT13   | AMOTL2   | BASP1   | EMP1       |
| KRT17   | ANKRD1   | TACSTD2 | EPS8L1     |
| LY6D    | IGFBP3   | SFTPD   | JUP        |
| KRT7    | F3       | MAL     | LMO7       |
| KRT5    | FJX1     | CLU     | MYOF       |
| FAM83A  | NUAK2    | WFDC2   | ITGB4      |
| CD109   | LATS2    | MSLN    | GPRC5A     |
| GAPDH   | CRIM1    | VSIG1   | AHNAK      |
| CSTA    | GADD45A  | TUBB6   | CAMK2N1    |
| PTPN13  | TGFB2    | CRIP2   | C19orf33   |
| MTSS1   | PTPN14   | ANXA1   | MYH14      |
| SPRR1B  | NT5E     | COL4A1  | CD55       |
| SLC2A1  | FOXF2    | IL33    | RHOF       |
| CAV1    | AXL      | COL4A2  | TMBIM1     |
| EMP1    | DOCK5    | KRT4    | SEMA3B     |
| SEMA3C  | ASAP1    | IGFBP7  | TINAGL1    |
| DHRS9   | RBMS3    | AKAP13  | MISP       |
| CAST    | MYOF     | ECSCR   | COL17A1    |
| FLNA    | ARHGEF17 | GKN1    | PLEC       |
| SLITRK6 | CCDC80   | CDH13   | TSPAN1     |
| COL7A1  |          | SLC45A3 | ABHD11-AS1 |
| AQP3    |          | EFNA5   | PTPRH      |
| MT2A    |          | ANXA8   | CRB3       |
| AHNAK2  |          | ACSM3   | ITGA3      |
| KRT19   |          | PPIC    | RIOK3      |
| PKP1    |          | ANXA3   | LAMC2      |
| YBX3    |          | EDA2R   | CYP3A5     |
| GJB5    |          | S100A6  | FA2H       |
|         |          | EFEMP1  | RRAS       |

|          |          |
|----------|----------|
| DDIT4L   | MUC13    |
| PDZK1IP1 | CEACAM1  |
| LY6D     | TMPRSS2  |
| LAPTM5   | SERINC2  |
| PLEKHS1  | SLC44A4  |
| HS6ST2   | PCDH1    |
| SLC4A11  | USP53    |
| CRYAB    | C1orf106 |
| SH3KBP1  | FLNB     |
| SAMD5    | CXCL16   |
| PHLDA3   | EZR      |
| KRT7     | TNFRSF21 |
| IL1RN    | CDA      |
| CCND1    | ADAM9    |
| PLAUR    | RNF103   |
| SYT8     | KRT80    |
| TMEM40   | EFNB1    |
| PTP4A3   | SMAD3    |
| GPX2     | PDZK1IP1 |
| PSAPL1   | LRP10    |
| S100A11  | PRSS22   |
| PSCA     | AHNAK2   |
| SOX21    | B4GALT1  |
| FABP5    | ANXA11   |
| COL18A1  | BAIAP2L1 |
| CD14     | F11R     |
| PMM1     | DUSP5    |
| PLK2     | DDR1     |
| CLIC3    | ITGB1    |
| NCMAP    | SLC2A1   |
| EREG     | CDKN2B   |
| ICAM1    | PLAUR    |
| CCNG1    | ITGA2    |

|         |             |
|---------|-------------|
| RBMS1   | CDCP1       |
| MGAT4C  | CD59        |
| RDH10   | DSG2        |
| ENAH    | KLK10       |
| VNN1    | ARFGAP3     |
| EPHA4   | CD68        |
| PDLIM4  | CGN         |
| TNNI2   | TM4SF1      |
| IER3    | PPP2CB      |
| GLIPR1  | HEBP2       |
| IL17RE  | UGCG        |
| PRSS22  | GBP3        |
| TSPAN6  | TIMP2       |
| TNS4    | PINK1       |
| S100A14 | CYSTM1      |
| LAMC2   | SLC6A8      |
| ECM1    | PPARD       |
| SCEL    | LIPH        |
| OSBPL5  | CLIC3       |
| TLR4    | SPINT1      |
| TIMP2   | PTK6        |
| TREX2   | TJP3        |
| GATM    | STK24       |
| ZIC4    | AC009133.12 |
| ARL4C   | CEACAM5     |
| WWTR1   | MXD1        |
| AQP5    | SNX9        |
| CAPN2   | ERO1L       |
| CCP110  | SSFA2       |
| EMP2    | TSPAN3      |
| ABCC4   | SLPI        |
| HYAL1   | BMP2        |
| IFT57   | GJB3        |

SLC25A48  
PSRC1  
SLC44A2  
HSPA1A  
PPL  
MGMT  
CXCL16  
P2RY6  
DDAH1  
PMEPA1  
GCNT1  
CGNL1  
EMP1  
BOK  
ILDR1  
ARHGEF3  
MSN  
DCXR  
SPATA6  
ARHGAP44  
RGS19  
NOXO1  
VANGL1  
S100A4  
TSPAN4  
GPR137B  
CCND2  
TTC9  
PDRG1  
VAMP5  
FAR1  
SERPINB5  
CTSH

LAMA3  
TMPRSS4  
B4GALNT3



AKR1B10  
RAB15  
ZMAT3  
AHNAK  
KRT18  
DAPK1  
FLOT2  
AVPI1  
RAB11FIP5  
PAQR8  
SERPINB11  
PRKAR1A  
LAMA3  
TINAGL1  
MCAM  
NFE2L3  
SH3BGR2  
LMNA  
SCMH1  
PDLIM7  
FOXQ1  
GCNT3  
TMEM43  
MDM2  
GTSE1  
GPC1  
CAMSAP2  
HSPB1  
EPS8L1  
CKAP2  
GOLGA8S  
PLAT  
WWC2

INF2  
MRAS  
CHRNA1  
ANXA5  
AK1  
VAX1  
TEAD4  
DYRK3  
ITGB4  
BAX  
ARL1  
RHOD  
MSANTD3  
KLRG2  
CLCF1  
ID2  
SGCB  
AEN  
ABCC5  
FLNC  
PIR  
FMNL2  
CD44  
SLC39A10  
ENDOD1  
MBOAT1  
KIF3  
CCDC92  
SUSD4  
CNN2  
GNAI1  
RAB27B  
TSPAN2

USP46  
P2RY2  
CD55  
KRT23  
GSN  
S100A16  
TBC1D2  
SORL1  
FKBP9  
AAAS  
EPN3  
FRMD6  
ALCAM  
ABI3  
B9D1  
ZBTB32  
GJB3  
PLCD3  
BTG2  
SLC19A2  
SLCO4A1  
BAIAP2  
BIVM-ERCC5  
ABHD4  
KCNN4  
DHH  
AP1S3  
WNT4  
GLIS3  
TNFAIP8  
MLKL  
PHLDA2  
FOSL1

DUSP22  
HSPA2  
WTIP  
KLHL13  
CAMKK1  
CAPN5  
ICA1  
TNFRSF10B  
GADD45B  
EXOC4  
RGS17  
STX11  
RPS19  
GUSB  
SERPINH1  
CPT1C  
BTBD11  
FAM149A
