# Supplementary material for: Metastatic recurrence in colorectal cancer arises from residual EMP1+ cells
Source: PubMed Central journal article supplement (PMC7616986; doi:10.1038/s41586-022-05402-9), 2022-11-09

Supplementary Data 1. Uncropped Western Blot related to Ext.Fig.9g

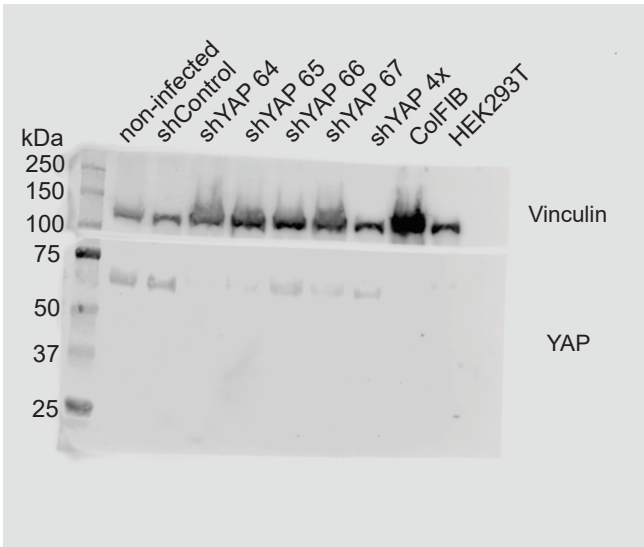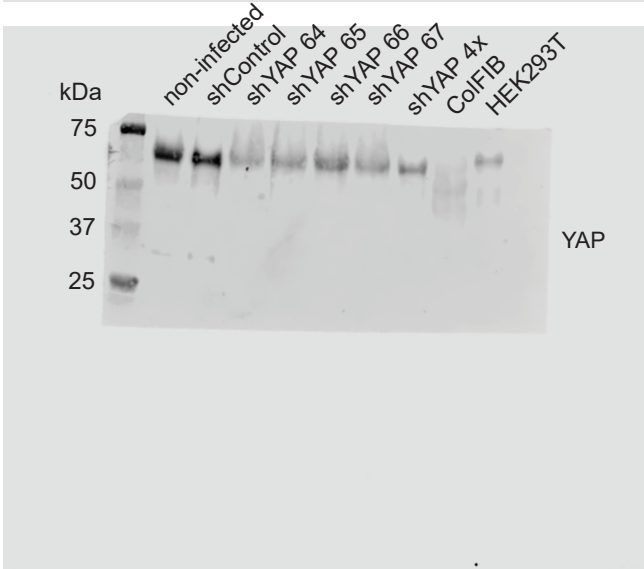

## Supplementary Data 2. Example of gating strategy

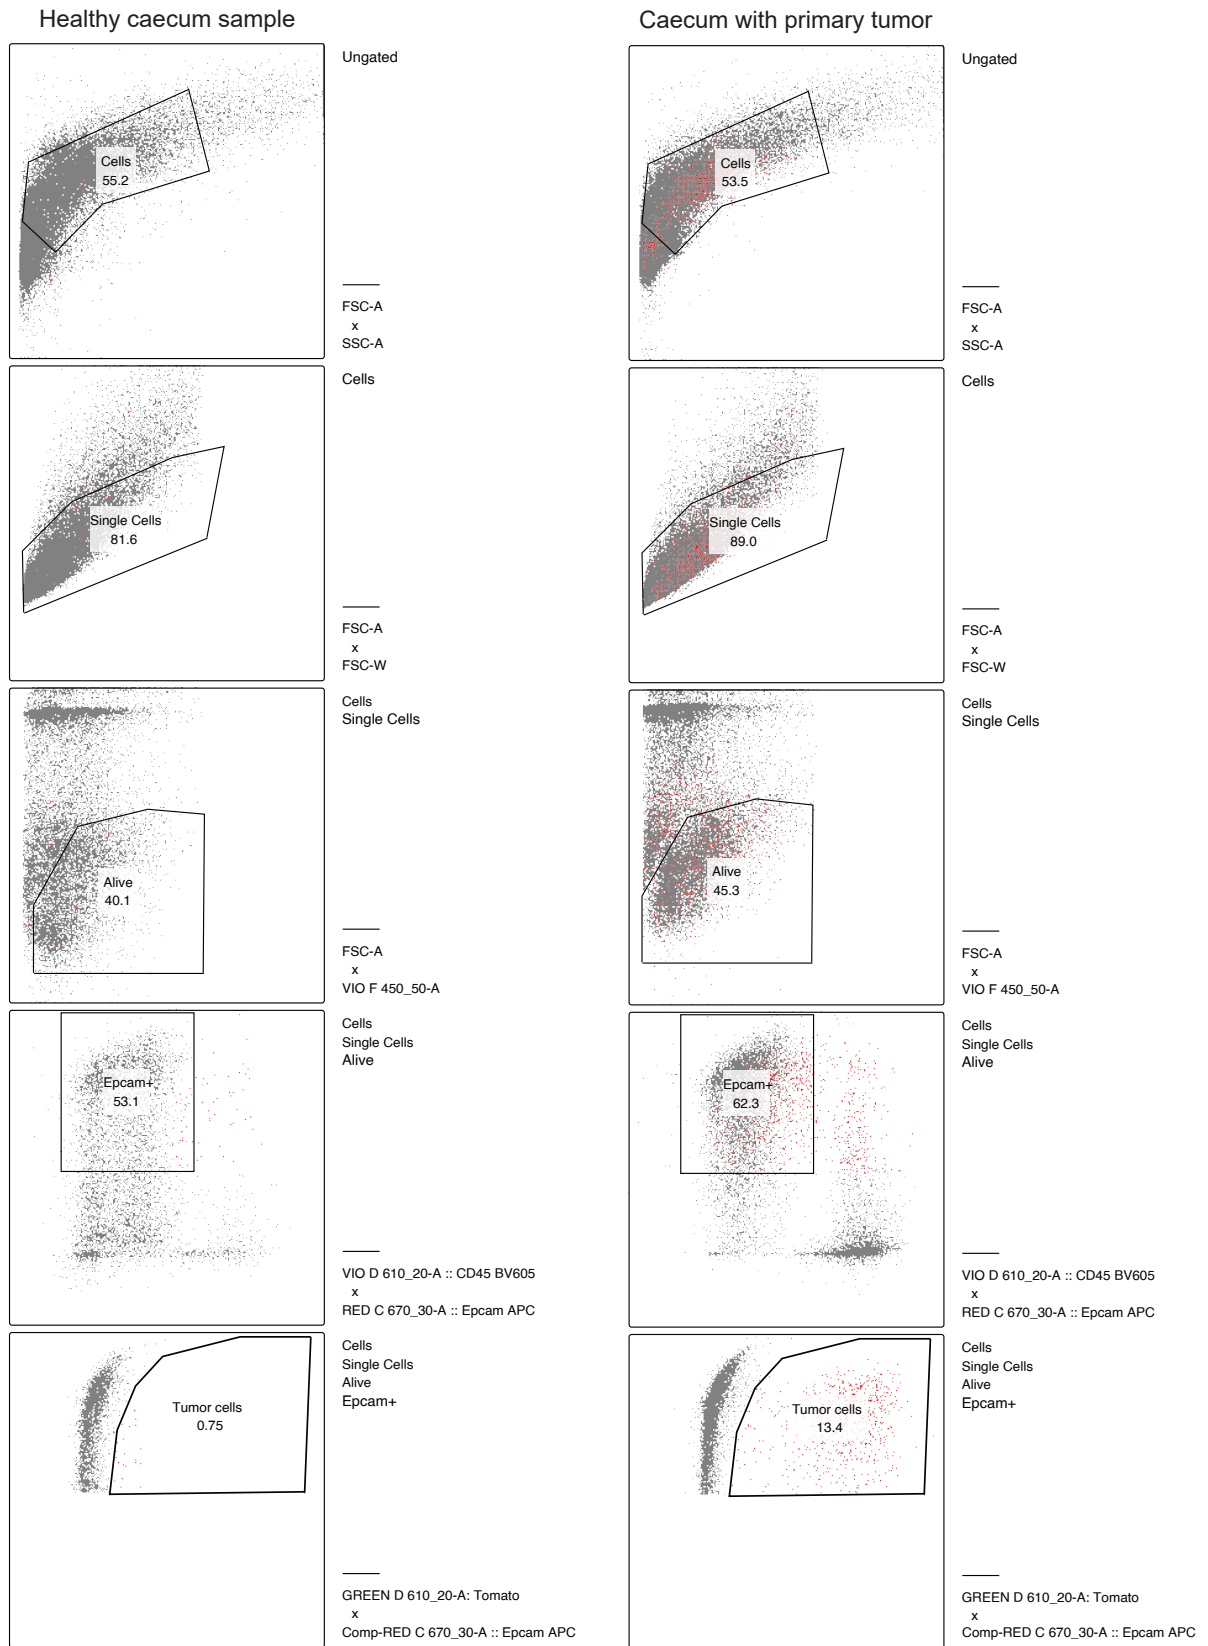

Supplement: EMS181817-supplement-Supplementary_Data.pdf [file EMS181817-supplement-Supplementary_Data.pdf]
